# Supplementary material for: SARS-CoV-2 Genetic Diversity and Lineage Dynamics in Egypt during the First 18 Months of the Pandemic
Source: MDPI journal article supplement (doi:10.3390/v14091878), 2022-08-25
Supplement: s1 [file s1]

A)

Number of Introductions

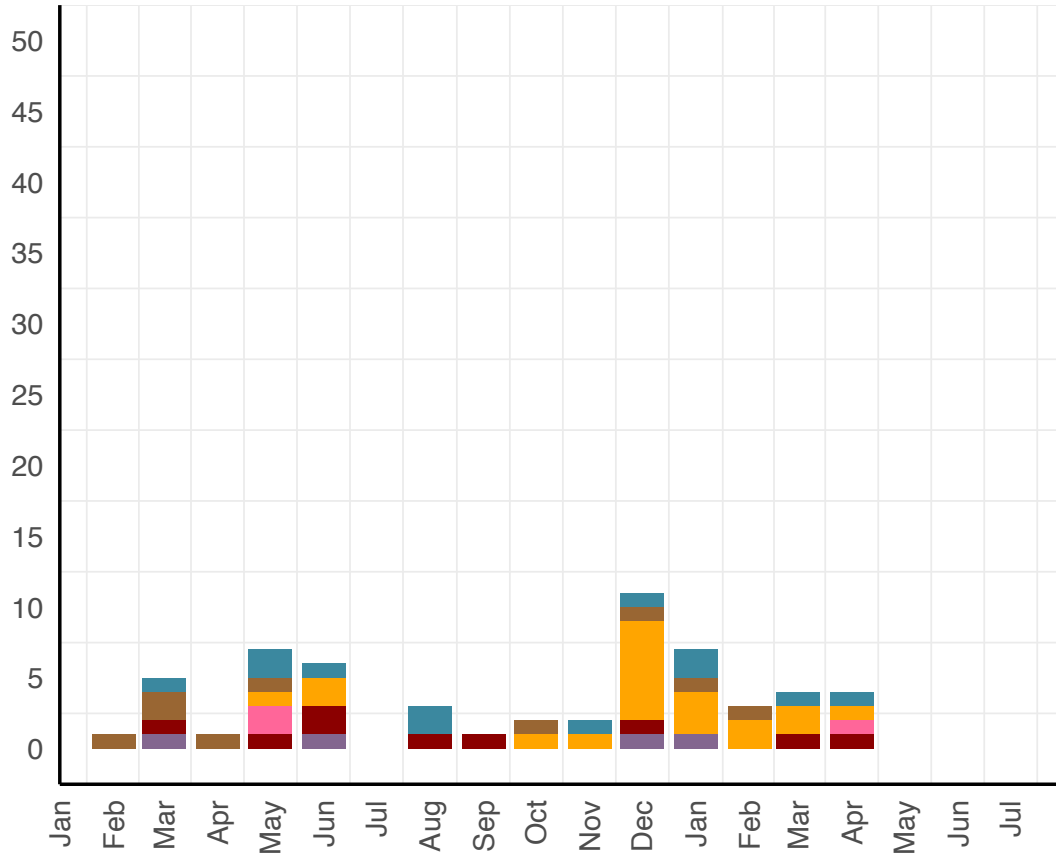

2020

2021

Asia

Oceania

North America

Europe

South America

Africa

B)

Number of Exports

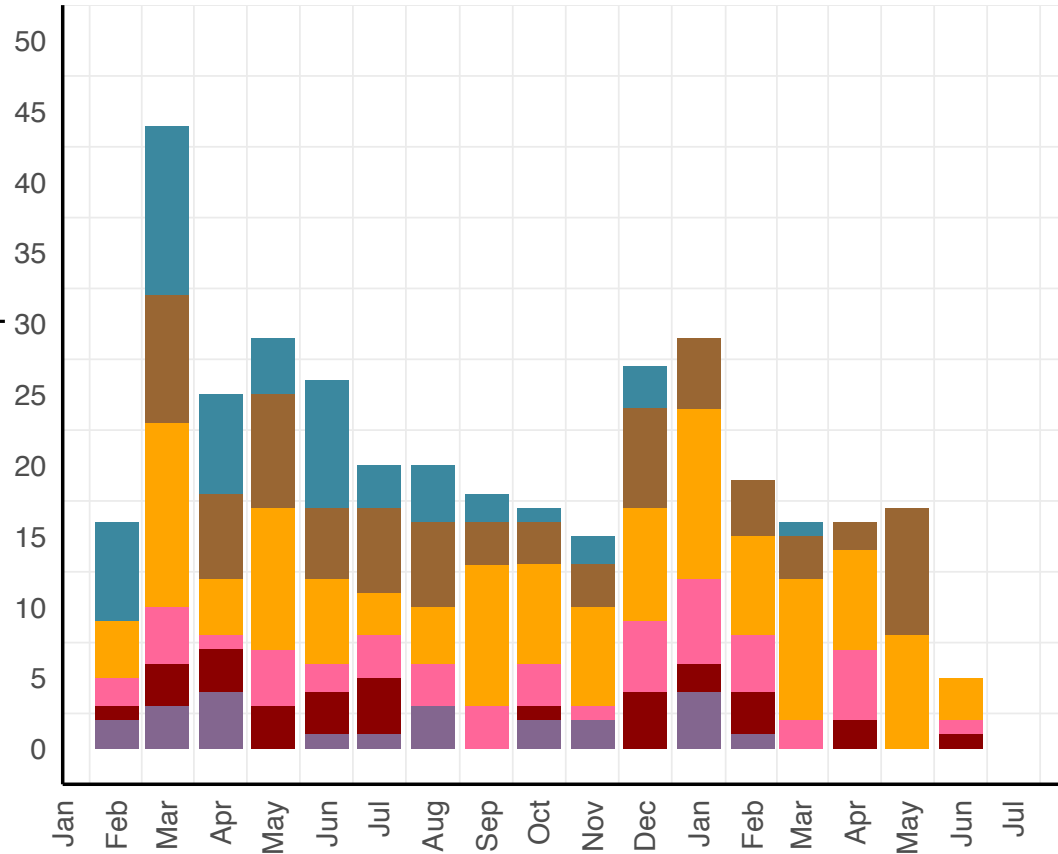

2020

2021

Asia

Oceania

North America

Europe

South America

Africa
