# Supplementary material for: SARS-CoV-2 Genetic Diversity and Lineage Dynamics in Egypt during the First 18 Months of the Pandemic
Source: MDPI journal article supplement (doi:10.3390/v14091878), 2022-08-25
Supplement: s1 [file s1]

We gratefully acknowledge the following Authors from the Originating laboratories responsible for obtaining the specimens, as well as the Submitting laboratories where the genome data were generated and shared via GISAID, on which this research is based.

All Submitters of data may be contacted directly via [www.gisaid.org](http://www.gisaid.org)

Authors are sorted alphabetically.

| Accession ID                                                                   | Originating Laboratory                                                                                                                                                                                                                                                                                                                                                                                                                                                                                                                                                                                                                                                                                                                                                            | Submitting Laboratory                                                                                                                                                                                                                                                                                                                                                    | Authors                                                                                                                                                                                                                                                                                                                                                                                                                                                                                                                                                                                                                                                                                                                                                                                                                                                                                                                                                                                                                                                                                                                                                                                                                                                                          |
|--------------------------------------------------------------------------------|-----------------------------------------------------------------------------------------------------------------------------------------------------------------------------------------------------------------------------------------------------------------------------------------------------------------------------------------------------------------------------------------------------------------------------------------------------------------------------------------------------------------------------------------------------------------------------------------------------------------------------------------------------------------------------------------------------------------------------------------------------------------------------------|--------------------------------------------------------------------------------------------------------------------------------------------------------------------------------------------------------------------------------------------------------------------------------------------------------------------------------------------------------------------------|----------------------------------------------------------------------------------------------------------------------------------------------------------------------------------------------------------------------------------------------------------------------------------------------------------------------------------------------------------------------------------------------------------------------------------------------------------------------------------------------------------------------------------------------------------------------------------------------------------------------------------------------------------------------------------------------------------------------------------------------------------------------------------------------------------------------------------------------------------------------------------------------------------------------------------------------------------------------------------------------------------------------------------------------------------------------------------------------------------------------------------------------------------------------------------------------------------------------------------------------------------------------------------|
| EPI_ISL_1167045                                                                | "Dr. Andrija Stampar" Teaching Institute of Public Health, Department of Clinical Microbiology                                                                                                                                                                                                                                                                                                                                                                                                                                                                                                                                                                                                                                                                                    | Istituto di Genomica Applicata                                                                                                                                                                                                                                                                                                                                           | Davide Scaglione; Eleonora Paparelli; Fedrica Cattonaro; Gabriele Magris; Irena Jurman; Jasmina Vranes; Michele Morgante; Slobodanka Radovic; Vera Vendramin                                                                                                                                                                                                                                                                                                                                                                                                                                                                                                                                                                                                                                                                                                                                                                                                                                                                                                                                                                                                                                                                                                                     |
| EPI_ISL_993056, EPI_ISL_994661, EPI_ISL_996004                                 | "Dr. Andrija Stampar" Teaching Institute of Public Health, Department of Clinical Microbiology                                                                                                                                                                                                                                                                                                                                                                                                                                                                                                                                                                                                                                                                                    | Institute of Applied Genomics                                                                                                                                                                                                                                                                                                                                            | Federica Cattonaro; Jasmina Vranes; Michele Morgante                                                                                                                                                                                                                                                                                                                                                                                                                                                                                                                                                                                                                                                                                                                                                                                                                                                                                                                                                                                                                                                                                                                                                                                                                             |
| EPI_ISL_2438647                                                                | "National Center of Expertise" CSEC MH RK in Kostanay region                                                                                                                                                                                                                                                                                                                                                                                                                                                                                                                                                                                                                                                                                                                      | Reference laboratory for the control of viral infections                                                                                                                                                                                                                                                                                                                 | Aidar Ussebayev; Aknur Mutalijeva; Andrey Komissarov; Artem Fadeev; Azamat Kenessov; Bekzhan Maikotov; Gaukhar Nussupbayeva; Madina Tleubergenova; Maria Pisareva; Nazym Tleumbetova                                                                                                                                                                                                                                                                                                                                                                                                                                                                                                                                                                                                                                                                                                                                                                                                                                                                                                                                                                                                                                                                                             |
| EPI_ISL_2438606                                                                | "National Center of Expertise" CSEC MH RK in Kyzylorda Region                                                                                                                                                                                                                                                                                                                                                                                                                                                                                                                                                                                                                                                                                                                     | Reference laboratory for the control of viral infections                                                                                                                                                                                                                                                                                                                 | Aidar Ussebayev; Aknur Mutalijeva; Andrey Komissarov; Artem Fadeev; Azamat Kenessov; Bekzhan Maikotov; Gaukhar Nussupbayeva; Madina Tleubergenova; Maria Pisareva; Nazym Tleumbetova                                                                                                                                                                                                                                                                                                                                                                                                                                                                                                                                                                                                                                                                                                                                                                                                                                                                                                                                                                                                                                                                                             |
| EPI_ISL_2438655                                                                | "National Center of Expertise" CSEC MH RK in West Kazakhstan Region                                                                                                                                                                                                                                                                                                                                                                                                                                                                                                                                                                                                                                                                                                               | Reference laboratory for the control of viral infections                                                                                                                                                                                                                                                                                                                 | Aidar Ussebayev; Aknur Mutalijeva; Andrey Komissarov; Artem Fadeev; Azamat Kenessov; Bekzhan Maikotov; Gaukhar Nussupbayeva; Madina Tleubergenova; Maria Pisareva; Nazym Tleumbetova                                                                                                                                                                                                                                                                                                                                                                                                                                                                                                                                                                                                                                                                                                                                                                                                                                                                                                                                                                                                                                                                                             |
| EPI_ISL_2840043                                                                | "Sangius" LLP                                                                                                                                                                                                                                                                                                                                                                                                                                                                                                                                                                                                                                                                                                                                                                     | Reference laboratory for the control of viral infections                                                                                                                                                                                                                                                                                                                 | Aidar Ussebayev; Aknur Mutalijeva; Andrey Komissarov; Artem Fadeev; Azamat Kenessov; Bekzhan Maikotov; Gaukhar Nussupbayeva; Madina Tleubergenova; Maria Pisareva; Nazym Tleumbetova                                                                                                                                                                                                                                                                                                                                                                                                                                                                                                                                                                                                                                                                                                                                                                                                                                                                                                                                                                                                                                                                                             |
| EPI_ISL_632310                                                                 | 1-Laboratory of Microbiology, National Reference Lab, Charles Nicolle Hospital; 2-University of Tunis ElManar, Faculty of Medicine of Tunis, LR99E509, Tunis, Tunisia                                                                                                                                                                                                                                                                                                                                                                                                                                                                                                                                                                                                             | 1-Clinical and Experimental Pharmacology Lab, LR16SP02, National Center of Pharmacovigilance, University of Tunis El Manar, Tunis, Tunisia. 2-Neurodegenerative diseases and psychiatric troubles, LR18SP03, Razi Hospital, University of Tunis El Manar, Tunis, Tunisia. 3- Ministry of Health, National Observatory of New and Emerging Diseases, 1006, Tunis, Tunisia | Alia Ben Kahla; Gaies Emma; Ilhem Boutiba-Ben Boubaker; Imen Kacem; Imen Mkada; Jalila Ben Khelil; Maher Kharrat; Mouna Ben Sassi; Mouna Safer; Nissaf Ben Alaya; Riadh Daghfous; Riadh Gouider.; Salma Abid; Sameh Trabelsi; Sana Ferjani; Soumaya RammeH                                                                                                                                                                                                                                                                                                                                                                                                                                                                                                                                                                                                                                                                                                                                                                                                                                                                                                                                                                                                                       |
| EPI_ISL_635059, EPI_ISL_707698, EPI_ISL_733500, EPI_ISL_763065, EPI_ISL_794736 | 1-Laboratory of Microbiology, National Reference Lab, Charles Nicolle Hospital; 2-University of Tunis ElManar, Faculty of Medicine of Tunis, LR99E509, Tunis, Tunisia                                                                                                                                                                                                                                                                                                                                                                                                                                                                                                                                                                                                             | 1-Clinical and Experimental Pharmacology Lab, LR16SP02, National Center of Pharmacovigilance, University of Tunis El Manar, Tunis, Tunisia. 2-Neurodegenerative diseases and psychiatric troubles, LR18SP03, Razi Hospital, University of Tunis El Manar, Tunis, Tunisia. 3- Ministry of Health, National Observatory of New and Emerging Diseases, 1006, Tunis, Tunisia | Alia Ben Kahla; Alia BenKahla; Asma Ferjani; Awatef El Moussi; Gaies Emma; Guedi Ali Barreh; Habiba Ben Romdhane; Hanen El Jebari; Ilhem Boutiba-Ben Boubaker; Imen Kacem; Imen Mkada; Ines Mdihi; Jalila Ben Khelil; Maher Kharrat; Mouna Ben Sassi; Mouna Safer; Nissaf Ben Alaya; Riadh Daghfous; Riadh Gouider.; Rouaa Ben Othman; Salma Abid; Sameh Trabelsi; Sana Ferjani; Sarra Chamman; Souissi Amira; Soumaya RammeH; ZaineB Hamzaoui                                                                                                                                                                                                                                                                                                                                                                                                                                                                                                                                                                                                                                                                                                                                                                                                                                   |
| EPI_ISL_492072                                                                 | 1. ViroGenetics - BSL3 Laboratory of Virology, Malopolska Centre of Biotechnology, Jagiellonian University; 2. II Department of Internal Medicine, Faculty of Medicine, Jagiellonian University Medical College; 3. Narodowy Instytut Zdrowia Publicznego - Państwowy Zakład Higieny (NIZP-PZH)                                                                                                                                                                                                                                                                                                                                                                                                                                                                                   | 1. ViroGenetics - BSL3 Laboratory of Virology, Malopolska Centre of Biotechnology, Jagiellonian University; 2. II Department of Internal Medicine, Faculty of Medicine, Jagiellonian University Medical College; 3. Narodowy Instytut Zdrowia Publicznego - Państwowy Zakład Higieny (NIZP-PZH).                                                                         | Agnieszka Kolakowska-Kulesza; Aleksandra A. Zasada; Aleksandra Milewska; Ewelina Hallman-Szelińska; Katarzyna Owczarek; Katarzyna Pancer; Katarzyna Zacharczuk; Krzysztof Pyrc; Magdalena Rzeczowska; Marek Sanak; Natalia Wolaniuk; Pawel P Labaj; Tomasz Wolkowicz; Wojciech Branicki                                                                                                                                                                                                                                                                                                                                                                                                                                                                                                                                                                                                                                                                                                                                                                                                                                                                                                                                                                                          |
| EPI_ISL_877029                                                                 | 1.AO Universitaria 'S. Giovanni di Dio e Ruggi D'Aragona, Scuola Medica Salernitana' Hospital / 2.UOOC di Virologia e Microbiologia, Università della Campania 'L. Vanvitelli' / 3.AO Universitaria 'Federico II' Napoli Hospital / 4.AORN 'San Giuseppe Moscati' Avellino Hospital / 5.AO 'San Pio - presidio G. Rummo' Benevento Hospital / 6.AO 'Sant'Anna e San Sebastiano' Caserta Hospital / 7.PO 'Maria Santissima Addolorata' Eboli Hospital / 8.Biogen Istituto di Ricerche Genetiche                                                                                                                                                                                                                                                                                    | 1. Genome Research Center for Health (CRGS) / 2. Laboratory of Molecular Medicine and Genomics(LMGE) / 3. Center for Research in Pure and Applied Mathematics (CRMPA)                                                                                                                                                                                                    | Alessandro Weisz (Corresponding Author); Alessia Cossu; Aniello Gentile; Annamaria Salvati; Antonello Saccomanno; Arnolfo Petruzziello; Assunta Sellitto; Carlo Ferravante; Domenico Memoli; Elena Alexandrova; Emilia Vaccaro; Francesca Marciano; Francesca Rizzo (Corresponding Author); Gianluigi Franci; Giorgio Giurato (Corresponding Author); Giovanni Nassa; Giovanni Pecoraro; Giuseppe Fenza; Giuseppe Portella; Gregorio Goffredi; Ilaria Terenzi; Jessica Lamberti; Maddalena Schioppa; Maria Grazia Foti; Maria Landi; Marianna Scrima; Mariarosaria Ingino; Mariarosaria Ingino; Massimiliano Galdiero; Maurizio Fumi; Michèle Caraglia; Michele Cennamo; Oriana Strianese; Pasquale Pagliano; Rita Greco; Roberta Tarallo; Sonia Amabile; Teresa Rocco; Valeria Mirici Cappa; Vincenzo Rocco; Viola Melone; Vittoria Letizia; Ylenia D'Agostino                                                                                                                                                                                                                                                                                                                                                                                                                  |
| EPI_ISL_1361596, EPI_ISL_1547392                                               | 1.AO Universitaria 'S. Giovanni di Dio e Ruggi D'Aragona, Scuola Medica Salernitana' Hospital / 2.UOOC di Virologia e Microbiologia, Università della Campania 'L. Vanvitelli' / 3.AO Universitaria 'Federico II' Napoli Hospital / 4.AORN 'San Giuseppe Moscati' Avellino Hospital / 5.AO 'San Pio - presidio G. Rummo' Benevento Hospital / 6.AO 'Sant'Anna e San Sebastiano' Caserta Hospital / 7.PO 'Maria Santissima Addolorata' Eboli Hospital / 8.Biogen Istituto di Ricerche Genetiche / 9. U.O.C. di Genetica Medica e di Laboratorio A.O.R.N., Azienda Ospedaliera di Rilievo Nazionale Antonio Cardarelli, Napoli / 10. Centro di riferimento Oncologico della Basilicata (IRCCS-CROB), Rionero in Vulture (PZ) / 11. Presidio Ospedaliero di Agropoli, Agropoli (SA). | 1. Genome Research Center for Health (CRGS) / 2. Laboratory of Molecular Medicine and Genomics(LMGE) / 3. Center for Research in Pure and Applied Mathematics (CRMPA)                                                                                                                                                                                                    | Alessandro Weisz; Alessandro Weisz (Corresponding Author); Alessia Cossu; Andreina Baj; Aniello Gentile; Annamaria Salvati; Antonello Saccomanno; Arnolfo Petruzziello; Assunta Sellitto; Caivano Antonella; Carlo Ferravante; D'Auria Fiorella; De Luca Luciana.; Domenico Memoli; Domenico Palumbo; Edmondo Adorisio; Elena Alexandrova; Emilia Vaccaro; Fausto Sessa; Francesca Marciano; Francesca Rizzo; Francesca Rizzo (Corresponding Author); Francesco Curcio; Gianluigi Franci; Giorgio Dirani; Giorgio Giurato; Giorgio Giurato (Corresponding Author); Giovanni Nassa; Giovanni Pecoraro; Giuseppe Fenza; Giuseppe Portella; Giusy Giordano; Gregorio Goffredi; Ilaria Terenzi; Jessica Lamberti; Maddalena Schioppa; Marcello Ametrano; Maria Grazia Foti; Maria Landi; Marianna Scrima; Mariano Fiorenza; Mariarosaria Ingino; Marina Tarsitano; Massimiliano Chetta; Massimiliano Galdiero; Maurizio Fumi; Michela Iacobellis; Michele Caraglia; Michele Cennamo; Morena D'Avenia; Oriana Strianese; Pasquale Pagliano; Rita Greco; Roberta Tarallo; Rosanna Pilusico; Silvia Zanoli; Simona Sempini; Sonia Amabile; Stefania Marzinnotti; Teresa Rocco; Valeria Mirici Cappa; Vincenzo Rocco; Viola Melone; Vittoria Letizia; Vittorio Sambri; Ylenia D'Agostino |
| EPI_ISL_2140715                                                                | 2 Military Hospital wc MAA                                                                                                                                                                                                                                                                                                                                                                                                                                                                                                                                                                                                                                                                                                                                                        | NHLS/UCT                                                                                                                                                                                                                                                                                                                                                                 | Arash Iranzadeh; Bruna Galvao; Carolyn Williamson; Deelan Doolabh; Diana Hardie; Innocent Mudau; Innocent Mudau; Lynn Tyers; Marvin Hsiao; Stephen Korsman                                                                                                                                                                                                                                                                                                                                                                                                                                                                                                                                                                                                                                                                                                                                                                                                                                                                                                                                                                                                                                                                                                                       |
| EPI_ISL_2547411                                                                | 2 Military Hospital wc MAA                                                                                                                                                                                                                                                                                                                                                                                                                                                                                                                                                                                                                                                                                                                                                        | National Health Laboratory Service/University of Cape Town (NHLS/UCT)                                                                                                                                                                                                                                                                                                    | Arash Iranzadeh; Bruna Galvao; Carolyn Williamson; Deelan Doolabh; Diana Hardie; Gert Marais; Innocent Mudau; Lynn Tyers; Marvin Hsiao; Stephen Korsman                                                                                                                                                                                                                                                                                                                                                                                                                                                                                                                                                                                                                                                                                                                                                                                                                                                                                                                                                                                                                                                                                                                          |
| EPI_ISL_2646244                                                                | ACM Bio                                                                                                                                                                                                                                                                                                                                                                                                                                                                                                                                                                                                                                                                                                                                                                           | Carba lab                                                                                                                                                                                                                                                                                                                                                                | Aude Lessenne; Bénédicte Roquebert; Emmanuel Lecorche; Kader Merah; Laura Verdumre; Patrice Herisson; Sabine Trombert-Paolantoni; Stéphanie Haïm-Boukobza; Thierry Collin                                                                                                                                                                                                                                                                                                                                                                                                                                                                                                                                                                                                                                                                                                                                                                                                                                                                                                                                                                                                                                                                                                        |
| EPI_ISL_2621213                                                                | ADILAB                                                                                                                                                                                                                                                                                                                                                                                                                                                                                                                                                                                                                                                                                                                                                                            | Universidad Nacional de Colombia - Laboratorio Genómico One Health                                                                                                                                                                                                                                                                                                       | Andres F. Cardona-Rios; Carlos Franco-Muñoz; Carolina Muñoz-Arango; Celeny Ortiz; Daniel O. Maldonado-Perez; Diego A. Álvarez-Díaz; Hector Alejandro Ruiz-Moreno; Idabely Betancur Ortiz; Jorge E. Osorio; Juan P. Hernandez-Ortiz; Karl A Ciuderis; Katherine Laiton-Donato; Laura Silvana Perez; Lina M. Hurtado; Marcela Mercado-Reyes; Maria Angélica Maya; Maria Stella López; Rita Almanza Payares; Sandra Ines Cano; Simón Villegas Velásquez                                                                                                                                                                                                                                                                                                                                                                                                                                                                                                                                                                                                                                                                                                                                                                                                                             |
| EPI_ISL_2617039, EPI_ISL_2617056                                               | AFRICA_CDC - Angola (Ship 12)                                                                                                                                                                                                                                                                                                                                                                                                                                                                                                                                                                                                                                                                                                                                                     | CERI, Centre for Epidemic Response and Innoation, Stellenbosch University and KRISP, KZN Research Innovation and Sequencing Platform, UKZN.                                                                                                                                                                                                                              | Afonso P; David K; Emmanuel SJ; Freitas RH; Giandhari J; Inglês L; Lutucuta S; Miranda J; Morais J; Mufinda M; Naidoo Y; Neto Z; Paulo A Carralero RR Paixão JP; Pereira A; Pillay S; Tegally H; Wilkinson E; de Oliveira T                                                                                                                                                                                                                                                                                                                                                                                                                                                                                                                                                                                                                                                                                                                                                                                                                                                                                                                                                                                                                                                      |
| EPI_ISL_918437, EPI_ISL_918438                                                 | AIID                                                                                                                                                                                                                                                                                                                                                                                                                                                                                                                                                                                                                                                                                                                                                                              | Irish Coronavirus Sequencing Consortium-Teagasc Grange                                                                                                                                                                                                                                                                                                                   | Ajjandro Abner Garcia Leon; Calum Walsh; Fiona Crispie; Gabriel Gonzalez; John Kenny; Matthew McCabe; Michael Carr; Patrick Mallon; Paul Cotter                                                                                                                                                                                                                                                                                                                                                                                                                                                                                                                                                                                                                                                                                                                                                                                                                                                                                                                                                                                                                                                                                                                                  |
| EPI_ISL_2018254                                                                | AK State Public Health Lab, State Health Department                                                                                                                                                                                                                                                                                                                                                                                                                                                                                                                                                                                                                                                                                                                               | Centers for Disease Control and Prevention Division of Viral Diseases, Pathogen Discovery                                                                                                                                                                                                                                                                                | Alison Lauffer Halpin; Ben L. Rambo-Martin; Clinton R. Paden; Dakota Howard; Darlene Wagner; Dave Wentworth; Dhvani Batra; Jasmine Padilla; Justin Lee; Katie Dillon; Krista Queen; Kristen Nripe; Kristine Lacey; Mark Burroughs; Matthew Schmerer; Mili Sheth; Peter Cook; Sam Shepard; Sarah Nobles; Shoshona Le; Suxiang Tong; Vivien Dugan; Yvette Unoarumhi Akbar Kanji; Asghar Nasir; Rumina Hasan; Safina A. Razzak; Sayed Ali Raza; Zahra Hasan                                                                                                                                                                                                                                                                                                                                                                                                                                                                                                                                                                                                                                                                                                                                                                                                                         |
| EPI_ISL_2608418                                                                | AKUH Laboratories, Karachi, Pakistan                                                                                                                                                                                                                                                                                                                                                                                                                                                                                                                                                                                                                                                                                                                                              | AKUH Laboratories, Karachi, Pakistan                                                                                                                                                                                                                                                                                                                                     |                                                                                                                                                                                                                                                                                                                                                                                                                                                                                                                                                                                                                                                                                                                                                                                                                                                                                                                                                                                                                                                                                                                                                                                                                                                                                  |
| EPI_ISL_2383982                                                                | AL Dept. of Public Health Bureau of Clinical Laboratories                                                                                                                                                                                                                                                                                                                                                                                                                                                                                                                                                                                                                                                                                                                         | Centers for Disease Control and Prevention Division of Viral Diseases, Pathogen Discovery                                                                                                                                                                                                                                                                                | Alison Lauffer Halpin; Ben L. Rambo-Martin; Clinton R. Paden; Dakota Howard; Darlene Wagner; Dave Wentworth; Dhvani Batra; Jasmine Padilla; Justin Lee; Katie Dillon; Krista Queen; Kristen Nripe; Kristine Lacey; Mark Burroughs; Matthew Schmerer; Mili Sheth; Peter Cook; Sam Shepard; Sarah Nobles; Shoshona Le; Suxiang Tong; Vivien Dugan; Yvette Unoarumhi                                                                                                                                                                                                                                                                                                                                                                                                                                                                                                                                                                                                                                                                                                                                                                                                                                                                                                                |
| EPI_ISL_2868624                                                                | ALBANY MEDICAL CENTER                                                                                                                                                                                                                                                                                                                                                                                                                                                                                                                                                                                                                                                                                                                                                             | Wadsworth Center, New York State Department of Health                                                                                                                                                                                                                                                                                                                    | Alexis Russell; Catharine Prussing; Daryl M. Lamson; Erasmus Schneider; Erica Lasek-Nesselquist; John Kelly; Jonathan Pitnick; Kirsten St. George; Matthew Shudt; Melissa A Leisner; Navjot Singh                                                                                                                                                                                                                                                                                                                                                                                                                                                                                                                                                                                                                                                                                                                                                                                                                                                                                                                                                                                                                                                                                |
| EPI_ISL_2493041                                                                | AMPATH                                                                                                                                                                                                                                                                                                                                                                                                                                                                                                                                                                                                                                                                                                                                                                            | CERI, Centre for Epidemic Response and Innoation, Stellenbosch University and KRISP, KZN Research Innovation and Sequencing Platform, UKZN.                                                                                                                                                                                                                              | Emmanuel SJ; Giandhari J; Khan S; Lessells R; Mdalose K; Naidoo Y; Pillay S; Ramphal U; Tegally H; Wilkinson E; York D; de Oliveira T                                                                                                                                                                                                                                                                                                                                                                                                                                                                                                                                                                                                                                                                                                                                                                                                                                                                                                                                                                                                                                                                                                                                            |
| EPI_ISL_2086992, EPI_ISL_2087012, EPI_ISL_2087018                              | AMPATH LABORATORIES                                                                                                                                                                                                                                                                                                                                                                                                                                                                                                                                                                                                                                                                                                                                                               | National Institute for Communicable Diseases of the National Health Laboratory Service                                                                                                                                                                                                                                                                                   | Amoako DG; Bhiman JN; Ismail A; Mahlangu B; Mohale T; Ntuli N; Scheepers C                                                                                                                                                                                                                                                                                                                                                                                                                                                                                                                                                                                                                                                                                                                                                                                                                                                                                                                                                                                                                                                                                                                                                                                                       |
| EPI_ISL_2658283                                                                | AREA DE SALUD ALAJUELITA                                                                                                                                                                                                                                                                                                                                                                                                                                                                                                                                                                                                                                                                                                                                                          | Incienza, Instituto Costarricense de Investigación y Enseñanza en Nutrición y Salud                                                                                                                                                                                                                                                                                      | Adriana Godínez; Claudio Soto-Garita; Estela Cordero; Francisco Duarte; Hebleen Porras; José Luis Vargas; Mariela Gutiérrez & Joselyn Prado; Melany Calderón                                                                                                                                                                                                                                                                                                                                                                                                                                                                                                                                                                                                                                                                                                                                                                                                                                                                                                                                                                                                                                                                                                                     |
| EPI_ISL_3037812                                                                | AREA DE SALUD BAGACES                                                                                                                                                                                                                                                                                                                                                                                                                                                                                                                                                                                                                                                                                                                                                             | Incienza, Instituto Costarricense de Investigación y Enseñanza en Nutrición y Salud                                                                                                                                                                                                                                                                                      | Adriana Godínez; Caterina Guzmán; Claudio Soto-Garita; Estela Cordero; Francisco Duarte; Hebleen Porras; José Luis Vargas; Mariela Gutiérrez Joselyn Prado; Melany Calderón; Nazareth Ruiz & Adriana Bermúdez                                                                                                                                                                                                                                                                                                                                                                                                                                                                                                                                                                                                                                                                                                                                                                                                                                                                                                                                                                                                                                                                    |
| EPI_ISL_3037817                                                                | AREA DE SALUD BELEN-FLORES - CLINICA DR. JORGE VOLIO                                                                                                                                                                                                                                                                                                                                                                                                                                                                                                                                                                                                                                                                                                                              | Incienza, Instituto Costarricense de Investigación y Enseñanza en Nutrición y Salud                                                                                                                                                                                                                                                                                      | Adriana Godínez; Caterina Guzmán; Claudio Soto-Garita; Estela Cordero; Francisco Duarte; Hebleen Porras; José Luis Vargas; Mariela Gutiérrez Joselyn Prado; Melany Calderón; Nazareth Ruiz & Sandra Mora Leitón                                                                                                                                                                                                                                                                                                                                                                                                                                                                                                                                                                                                                                                                                                                                                                                                                                                                                                                                                                                                                                                                  |
| EPI_ISL_2272981                                                                | AREA DE SALUD CARRILLO                                                                                                                                                                                                                                                                                                                                                                                                                                                                                                                                                                                                                                                                                                                                                            | Incienza, Instituto Costarricense de Investigación y Enseñanza en Nutrición y Salud                                                                                                                                                                                                                                                                                      | Adriana Godínez; Claudio Soto-Garita; Estela Cordero; Francisco Duarte; Hebleen Porras; Joselyn Prado & Adriana Bermúdez Espinoza; José Luis Vargas; Mariela Gutiérrez; Melany Calderón                                                                                                                                                                                                                                                                                                                                                                                                                                                                                                                                                                                                                                                                                                                                                                                                                                                                                                                                                                                                                                                                                          |
| EPI_ISL_2658271                                                                | AREA DE SALUD CHOMES - MONTEVERDE                                                                                                                                                                                                                                                                                                                                                                                                                                                                                                                                                                                                                                                                                                                                                 | Incienza, Instituto Costarricense de Investigación y Enseñanza en Nutrición y Salud                                                                                                                                                                                                                                                                                      | Adriana Godínez; Claudio Soto-Garita; Estela Cordero; Francisco Duarte; Hebleen Porras; Joselyn Prado & Javier Zárate-León; José Luis Vargas; Mariela Gutiérrez; Melany Calderón                                                                                                                                                                                                                                                                                                                                                                                                                                                                                                                                                                                                                                                                                                                                                                                                                                                                                                                                                                                                                                                                                                 |

|                                                                                                                                                                                                                                                                                                                                                                                                                                                                                                                                                                                                                                                                                                                                          |                                                                                                                                                                                                                                                                                                                                                                                                                                   |                                                                                                                                             |                                                                                                                                                                                                                                                                                                                                  |
|------------------------------------------------------------------------------------------------------------------------------------------------------------------------------------------------------------------------------------------------------------------------------------------------------------------------------------------------------------------------------------------------------------------------------------------------------------------------------------------------------------------------------------------------------------------------------------------------------------------------------------------------------------------------------------------------------------------------------------------|-----------------------------------------------------------------------------------------------------------------------------------------------------------------------------------------------------------------------------------------------------------------------------------------------------------------------------------------------------------------------------------------------------------------------------------|---------------------------------------------------------------------------------------------------------------------------------------------|----------------------------------------------------------------------------------------------------------------------------------------------------------------------------------------------------------------------------------------------------------------------------------------------------------------------------------|
| EPI_ISL_3037821                                                                                                                                                                                                                                                                                                                                                                                                                                                                                                                                                                                                                                                                                                                          | AREA DE SALUD COTO BRUS                                                                                                                                                                                                                                                                                                                                                                                                           | Incienza, Instituto Costarricense de Investigación y Enseñanza en Nutrición y Salud                                                         | Adriana Godínez; Caterina Guzmán; Claudio Soto-Garita; Estela Cordero; Francisco Duarte; Hebleen Porras; José Luis Vargas; Mariela Gutiérrez; Joselyn Prado; Melany Calderón; Nazareth Ruiz & María Fernanda Matamoros                                                                                                           |
| EPI_ISL_2502748                                                                                                                                                                                                                                                                                                                                                                                                                                                                                                                                                                                                                                                                                                                          | AREA DE SALUD DESAMPARADOS 2 (COOPESALUD)                                                                                                                                                                                                                                                                                                                                                                                         | Incienza, Instituto Costarricense de Investigación y Enseñanza en Nutrición y Salud                                                         | Adriana Godínez; Claudio Soto-Garita; Estela Cordero; Francisco Duarte; Hebleen Porras; Jose Luis Vargas; Joselyn Prado & Paola Sánchez-Traña; Mariela Gutierrez; Melany CalderOn                                                                                                                                                |
| EPI_ISL_3026033                                                                                                                                                                                                                                                                                                                                                                                                                                                                                                                                                                                                                                                                                                                          | AREA DE SALUD Desamparados 1 - CLINICA DR. MARCIAL FALLAS [GRIFO ALTO/Desamparados/San Jose]                                                                                                                                                                                                                                                                                                                                      | Incienza, Instituto Costarricense de Investigación y Enseñanza en Nutrición y Salud                                                         | Adriana Godínez; Caterina Guzmán; Claudio Soto-Garita; Estela Cordero; Francisco Duarte; Hebleen Porras; Joselyn Prado; José Luis Vargas; Mariela Gutiérrez; Melany Calderón; Nazareth Ruiz                                                                                                                                      |
| EPI_ISL_3026022                                                                                                                                                                                                                                                                                                                                                                                                                                                                                                                                                                                                                                                                                                                          | AREA DE SALUD EL GUARCO [EL GUARCO/CARTAGO]                                                                                                                                                                                                                                                                                                                                                                                       | Incienza, Instituto Costarricense de Investigación y Enseñanza en Nutrición y Salud                                                         | Adriana Godínez; Caterina Guzmán; Claudio Soto-Garita; Estela Cordero; Francisco Duarte; Hebleen Porras; Joselyn Prado; José Luis Vargas; Mariela Gutiérrez; Melany Calderón; Nazareth Ruiz & Mónica Charpentier                                                                                                                 |
| EPI_ISL_3026027                                                                                                                                                                                                                                                                                                                                                                                                                                                                                                                                                                                                                                                                                                                          | AREA DE SALUD FORTUNA [San Carlos/ALAJUELA]                                                                                                                                                                                                                                                                                                                                                                                       | Incienza, Instituto Costarricense de Investigación y Enseñanza en Nutrición y Salud                                                         | Adriana Godínez; Caterina Guzmán; Claudio Soto-Garita; Estela Cordero; Francisco Duarte; Hebleen Porras; Joselyn Prado; José Luis Vargas; Mariela Gutiérrez; Melany Calderón; Nazareth Ruiz & Carolina Arrieta                                                                                                                   |
| EPI_ISL_2828000                                                                                                                                                                                                                                                                                                                                                                                                                                                                                                                                                                                                                                                                                                                          | AREA DE SALUD GARABITO                                                                                                                                                                                                                                                                                                                                                                                                            | Incienza, Instituto Costarricense de Investigación y Enseñanza en Nutrición y Salud                                                         | Adriana Godínez; Claudio Soto-Garita; Estela Cordero; Francisco Duarte; Hebleen Porras; Joselyn Prado & María José Gómez; José Luis Vargas; Mariela Gutiérrez; Melany Calderón                                                                                                                                                   |
| EPI_ISL_2502755                                                                                                                                                                                                                                                                                                                                                                                                                                                                                                                                                                                                                                                                                                                          | AREA DE SALUD GOICOECHEA 2 - CLINICA DR. JIMENEZ NUÑEZ                                                                                                                                                                                                                                                                                                                                                                            | Incienza, Instituto Costarricense de Investigación y Enseñanza en Nutrición y Salud                                                         | Adriana Godínez; Claudio Soto-Garita; Estela Cordero; Francisco Duarte; Hebleen Porras; Jose Luis Vargas; Joselyn Prado & Alberto Madrigal-Vega; Mariela Gutierrez; Melany CalderOn                                                                                                                                              |
| EPI_ISL_2502736                                                                                                                                                                                                                                                                                                                                                                                                                                                                                                                                                                                                                                                                                                                          | AREA DE SALUD GUATUSO                                                                                                                                                                                                                                                                                                                                                                                                             | Incienza, Instituto Costarricense de Investigación y Enseñanza en Nutrición y Salud                                                         | Adriana Godínez; Claudio Soto-Garita; Estela Cordero; Francisco Duarte; Hebleen Porras; Jose Luis Vargas; Joselyn Prado & Francisco ChacOn-Valverde; Mariela Gutierrez; Melany CalderOn                                                                                                                                          |
| EPI_ISL_3026031                                                                                                                                                                                                                                                                                                                                                                                                                                                                                                                                                                                                                                                                                                                          | AREA DE SALUD Guatuso [Guatuso/ALAJUELA]                                                                                                                                                                                                                                                                                                                                                                                          | Incienza, Instituto Costarricense de Investigación y Enseñanza en Nutrición y Salud                                                         | Adriana Godínez; Caterina Guzmán; Claudio Soto-Garita; Estela Cordero; Francisco Duarte; Hebleen Porras; Joselyn Prado; José Luis Vargas; Mariela Gutiérrez; Melany Calderón; Nazareth Ruiz & Francisco Chacón                                                                                                                   |
| EPI_ISL_2272966                                                                                                                                                                                                                                                                                                                                                                                                                                                                                                                                                                                                                                                                                                                          | AREA DE SALUD HATILLO - CLINICA DR. SOLON NUÑEZ                                                                                                                                                                                                                                                                                                                                                                                   | Incienza, Instituto Costarricense de Investigación y Enseñanza en Nutrición y Salud                                                         | Adriana Godínez; Claudio Soto-Garita; Estela Cordero; Francisco Duarte; Hebleen Porras; Joselyn Prado & Roberto Brilla-Ferrer; José Luis Vargas; Mariela Gutiérrez; Melany Calderón                                                                                                                                              |
| EPI_ISL_2502739                                                                                                                                                                                                                                                                                                                                                                                                                                                                                                                                                                                                                                                                                                                          | AREA DE SALUD MATA REDONDA -HOSPITAL -CLINICA DR. MORENO CAÑAS                                                                                                                                                                                                                                                                                                                                                                    | Incienza, Instituto Costarricense de Investigación y Enseñanza en Nutrición y Salud                                                         | Adriana Godínez; Claudio Soto-Garita; Estela Cordero; Francisco Duarte; Hebleen Porras; Jose Luis Vargas; Joselyn Prado & Carolina Duarte; Mariela Gutierrez; Melany CalderOn                                                                                                                                                    |
| EPI_ISL_3037838                                                                                                                                                                                                                                                                                                                                                                                                                                                                                                                                                                                                                                                                                                                          | AREA DE SALUD MATA REDONDA-HOSPITAL - CLINICA DR. MORENO CAÑAS                                                                                                                                                                                                                                                                                                                                                                    | Incienza, Instituto Costarricense de Investigación y Enseñanza en Nutrición y Salud                                                         | & Nazareth Ruiz; Adriana Godínez; Caterina Guzmán; Claudio Soto-Garita; Estela Cordero; Francisco Duarte; Hebleen Porras; José Luis Vargas; Mariela Gutiérrez; Joselyn Prado; Melany Calderón                                                                                                                                    |
| EPI_ISL_2502720                                                                                                                                                                                                                                                                                                                                                                                                                                                                                                                                                                                                                                                                                                                          | AREA DE SALUD MORAVIA                                                                                                                                                                                                                                                                                                                                                                                                             | Incienza, Instituto Costarricense de Investigación y Enseñanza en Nutrición y Salud                                                         | Adriana Godínez; Claudio Soto-Garita; Estela Cordero; Francisco Duarte; Hebleen Porras; Jose Luis Vargas; Joselyn Prado & Marie! LOpez; Mariela Gutierrez; Melany CalderOn                                                                                                                                                       |
| EPI_ISL_3037845                                                                                                                                                                                                                                                                                                                                                                                                                                                                                                                                                                                                                                                                                                                          | AREA DE SALUD PAQUERA                                                                                                                                                                                                                                                                                                                                                                                                             | Incienza, Instituto Costarricense de Investigación y Enseñanza en Nutrición y Salud                                                         | Adriana Godínez; Caterina Guzmán; Claudio Soto-Garita; Estela Cordero; Francisco Duarte; Hebleen Porras; José Luis Vargas; Mariela Gutiérrez; Joselyn Prado; Melany Calderón; Nazareth Ruiz & Andre Moreno Carvajal                                                                                                              |
| EPI_ISL_2502757                                                                                                                                                                                                                                                                                                                                                                                                                                                                                                                                                                                                                                                                                                                          | AREA DE SALUD PARAISO-CERVANTES                                                                                                                                                                                                                                                                                                                                                                                                   | Incienza, Instituto Costarricense de Investigación y Enseñanza en Nutrición y Salud                                                         | Adriana Godínez; Claudio Soto-Garita; Estela Cordero; Francisco Duarte; Hebleen Porras; Jose Luis Vargas; Joselyn Prado & Mónica Charpentier; Mariela Gutierrez; Melany CalderOn                                                                                                                                                 |
| EPI_ISL_2502750                                                                                                                                                                                                                                                                                                                                                                                                                                                                                                                                                                                                                                                                                                                          | AREA DE SALUD PEREZ ZELEDON                                                                                                                                                                                                                                                                                                                                                                                                       | Incienza, Instituto Costarricense de Investigación y Enseñanza en Nutrición y Salud                                                         | Adriana Godínez; Claudio Soto-Garita; Estela Cordero; Francisco Duarte; Hebleen Porras; Jose Luis Vargas; Joselyn Prado & Fabricio Aguilar; Mariela Gutierrez; Melany CalderOn                                                                                                                                                   |
| EPI_ISL_3037819                                                                                                                                                                                                                                                                                                                                                                                                                                                                                                                                                                                                                                                                                                                          | AREA DE SALUD PEREZ ZELEDON                                                                                                                                                                                                                                                                                                                                                                                                       | Incienza, Instituto Costarricense de Investigación y Enseñanza en Nutrición y Salud                                                         | Adriana Godínez; Caterina Guzmán; Claudio Soto-Garita; Estela Cordero; Francisco Duarte; Hebleen Porras; José Luis Vargas; Mariela Gutiérrez; Joselyn Prado; Melany Calderón; Nazareth Ruiz & Yendry Ramírez                                                                                                                     |
| EPI_ISL_2658272, EPI_ISL_2658275                                                                                                                                                                                                                                                                                                                                                                                                                                                                                                                                                                                                                                                                                                         | AREA DE SALUD SAN RAFAEL                                                                                                                                                                                                                                                                                                                                                                                                          | Incienza, Instituto Costarricense de Investigación y Enseñanza en Nutrición y Salud                                                         | Adriana Godínez; Claudio Soto-Garita; Estela Cordero; Francisco Duarte; Hebleen Porras; Joselyn Prado & Javier Zárate-León; José Luis Vargas; Mariela Gutiérrez; Melany Calderón                                                                                                                                                 |
| EPI_ISL_2828008                                                                                                                                                                                                                                                                                                                                                                                                                                                                                                                                                                                                                                                                                                                          | AREA DE SALUD SAN RAMON                                                                                                                                                                                                                                                                                                                                                                                                           | Incienza, Instituto Costarricense de Investigación y Enseñanza en Nutrición y Salud                                                         | Adriana Godínez; Claudio Soto-Garita; Estela Cordero; Francisco Duarte; Hebleen Porras; José Luis Vargas; Mariela Gutiérrez & Joselyn Prado; Melany Calderón                                                                                                                                                                     |
| EPI_ISL_2272993                                                                                                                                                                                                                                                                                                                                                                                                                                                                                                                                                                                                                                                                                                                          | AREA DE SALUD SANTO DOMINGO                                                                                                                                                                                                                                                                                                                                                                                                       | Incienza, Instituto Costarricense de Investigación y Enseñanza en Nutrición y Salud                                                         | Adriana Godínez; Claudio Soto-Garita; Estela Cordero; Francisco Duarte; Hebleen Porras; Joselyn Prado & Margarita Lee-Lui; José Luis Vargas; Mariela Gutiérrez; Melany Calderón                                                                                                                                                  |
| EPI_ISL_2502744                                                                                                                                                                                                                                                                                                                                                                                                                                                                                                                                                                                                                                                                                                                          | AREA DE SALUD SIQUIRRRES                                                                                                                                                                                                                                                                                                                                                                                                          | Incienza, Instituto Costarricense de Investigación y Enseñanza en Nutrición y Salud                                                         | Adriana Godínez; Claudio Soto-Garita; Estela Cordero; Francisco Duarte; Hebleen Porras; Jose Luis Vargas; Joselyn Prado & Karla LOpez; Mariela Gutierrez; Melany CalderOn                                                                                                                                                        |
| EPI_ISL_2103384, EPI_ISL_2272958, EPI_ISL_2272977                                                                                                                                                                                                                                                                                                                                                                                                                                                                                                                                                                                                                                                                                        | AREA DE SALUD SIQUIRRRES                                                                                                                                                                                                                                                                                                                                                                                                          | Incienza, Instituto Costarricense de Investigación y Enseñanza en Nutrición y Salud                                                         | Adriana Godínez; Caterina Guzmán; Claudio Soto-Garita; Estela Cordero; Francisco Duarte; Hebleen Porras; Joselyn Prado; Joselyn Prado & Ileana Chaves-Peraza; José Luis Vargas; Mariela Gutiérrez; Melany Calderón; Nazareth Ruiz & Ileana Chaves-Peraza                                                                         |
| EPI_ISL_3037825                                                                                                                                                                                                                                                                                                                                                                                                                                                                                                                                                                                                                                                                                                                          | AREA DE SALUD TURRIALBA-JIMENEZ                                                                                                                                                                                                                                                                                                                                                                                                   | Incienza, Instituto Costarricense de Investigación y Enseñanza en Nutrición y Salud                                                         | Adriana Godínez; Caterina Guzmán; Claudio Soto-Garita; Estela Cordero; Francisco Duarte; Hebleen Porras; José Luis Vargas; Mariela Gutiérrez; Joselyn Prado; Melany Calderón; Nazareth Ruiz & Mónica Charpentier                                                                                                                 |
| EPI_ISL_2502758                                                                                                                                                                                                                                                                                                                                                                                                                                                                                                                                                                                                                                                                                                                          | AREA DE SALUD ZAPOTE-CATEDRAL - CLINICA DR. CARLOS DURAN                                                                                                                                                                                                                                                                                                                                                                          | Incienza, Instituto Costarricense de Investigación y Enseñanza en Nutrición y Salud                                                         | Adriana Godínez; Claudio Soto-Garita; Estela Cordero; Francisco Duarte; Hebleen Porras; Jose Luis Vargas; Joselyn Prado & Marco Cháves-Otárola; Mariela Gutierrez; Melany CalderOn                                                                                                                                               |
| EPI_ISL_1067612                                                                                                                                                                                                                                                                                                                                                                                                                                                                                                                                                                                                                                                                                                                          | AREA DE SALUD ZAPOTE-CATEDRAL - CLINICA DR. CARLOS DURAN                                                                                                                                                                                                                                                                                                                                                                          | Incienza, Instituto Costarricense de Investigación y Enseñanza en Nutrición y Salud                                                         | Adriana Godínez; Caterina Guzmán; Claudio Soto-Garita; Estela Cordero; Francisco Duarte; Hebleen Porras; Melany Calderón; Nazareth Ruiz & Melissa Carazo-Gutiérrez                                                                                                                                                               |
| EPI_ISL_2695444                                                                                                                                                                                                                                                                                                                                                                                                                                                                                                                                                                                                                                                                                                                          | ARS Archive - Laboratorio Laura Ayres                                                                                                                                                                                                                                                                                                                                                                                             | Instituto Nacional de Saude (INSA)                                                                                                          | Borges et al                                                                                                                                                                                                                                                                                                                     |
| EPI_ISL_517616, EPI_ISL_518802                                                                                                                                                                                                                                                                                                                                                                                                                                                                                                                                                                                                                                                                                                           | Academic Hospital Paramaribo                                                                                                                                                                                                                                                                                                                                                                                                      | Erasmus Medical Center                                                                                                                      | Bas Oude Munnink; Dion Gajadin; Ed Ijzerman; Emmanuelle Munger; Gary Gummels; Ingrid Krishnadhath; Lycke Woititz; Marion Koopmans; Mireille Van de Veer; Princes Wongsowidjojo; Radjesh Ori; Rohma Banwari; Stephen Vredend                                                                                                      |
| EPI_ISL_2833781                                                                                                                                                                                                                                                                                                                                                                                                                                                                                                                                                                                                                                                                                                                          | Adan Hospital                                                                                                                                                                                                                                                                                                                                                                                                                     | Kuwait Cancer Control Center                                                                                                                | Mona Alateeqi; Shakir Bahzad                                                                                                                                                                                                                                                                                                     |
| EPI_ISL_1445665, EPI_ISL_1650426, EPI_ISL_1689082, EPI_ISL_1702837, EPI_ISL_1737563, EPI_ISL_1835211, EPI_ISL_1837090, EPI_ISL_1837760, EPI_ISL_2040167, EPI_ISL_2040637, EPI_ISL_2040648, EPI_ISL_2040827, EPI_ISL_2041273, EPI_ISL_2042434, EPI_ISL_2090019, EPI_ISL_2090085, EPI_ISL_2146197, EPI_ISL_2148186, EPI_ISL_2148720, EPI_ISL_2148847, EPI_ISL_2150374, EPI_ISL_2158859, EPI_ISL_2159079, EPI_ISL_2159334, EPI_ISL_2180676, EPI_ISL_2187388, EPI_ISL_2201288, EPI_ISL_2202065, EPI_ISL_2203267, EPI_ISL_2243536, EPI_ISL_2280370, EPI_ISL_2368234, EPI_ISL_2370070, EPI_ISL_2421780, EPI_ISL_2489181, EPI_ISL_2489215, EPI_ISL_2528269, EPI_ISL_2600307, EPI_ISL_2687055, EPI_ISL_2687316, EPI_ISL_2687343, EPI_ISL_2709524 | Adrian Paskey; Alec Vest; Benjamin Rambo-Martin; Christopher Gulvick; Clinton R. Paden; Cyndi Clark; Dakota Howard; Darlene Wagner; Dhvani Batra; Dillon Nall; Duncan MacCannell; Ethan Sanders; Holly Houdeshell; Jason Caravas; Kara Moser; Matthew Hardison; Matthew Schmeer; Ola Kvalvaag; Patrick Campbell; Peter W. Cook; Rob Case; Scott Sammons; Shatavia Morrison; Shaun Westlund; Vikramsinh Ghorpade; Yvette Unoarumhi |                                                                                                                                             |                                                                                                                                                                                                                                                                                                                                  |
| see above                                                                                                                                                                                                                                                                                                                                                                                                                                                                                                                                                                                                                                                                                                                                | Aegis Sciences Corporation                                                                                                                                                                                                                                                                                                                                                                                                        | Centers for Disease Control and Prevention Division of Viral Diseases, Pathogen Discovery                                                   | Auld A; Chilima B; Chiwaula M; Emmanuel SJ; Giandhari J; Kaba M; Kampira E; Kasambara W; Kim L; Lessells R; Maida A; Mvula B; Mwangomba W; Naidoo Y; Panja L; Pillay S; Tegally H; Wadonda N; Wilkinson E; de Oliveira T                                                                                                         |
| EPI_ISL_2617050                                                                                                                                                                                                                                                                                                                                                                                                                                                                                                                                                                                                                                                                                                                          | Africa_CDC - Malawi P4 S2                                                                                                                                                                                                                                                                                                                                                                                                         | CERI, Centre for Epidemic Response and Innoation, Stellenbosch University and KRISP, KZN Research Innovation and Sequencing Platform, UKZN. | Auld A; Chilima B; Chiwaula M; Emmanuel SJ; Giandhari J; Kaba M; Kampira E; Kasambara W; Kim L; Lessells R; Maida A; Mvula B; Mwangomba W; Naidoo Y; Panja L; Pillay S; Tegally H; Wadonda N; Wilkinson E; de Oliveira T                                                                                                         |
| EPI_ISL_2617090                                                                                                                                                                                                                                                                                                                                                                                                                                                                                                                                                                                                                                                                                                                          | Africa_CDC - Malawi P6 S2                                                                                                                                                                                                                                                                                                                                                                                                         | CERI, Centre for Epidemic Response and Innoation, Stellenbosch University and KRISP, KZN Research Innovation and Sequencing Platform, UKZN. | Auld A; Chilima B; Chiwaula M; Emmanuel SJ; Giandhari J; Kaba M; Kampira E; Kasambara W; Kim L; Lessells R; Maida A; Mvula B; Mwangomba W; Naidoo Y; Panja L; Pillay S; Tegally H; Wadonda N; Wilkinson E; de Oliveira T                                                                                                         |
| EPI_ISL_2360250, EPI_ISL_2360251                                                                                                                                                                                                                                                                                                                                                                                                                                                                                                                                                                                                                                                                                                         | Afzalipoor Hospital                                                                                                                                                                                                                                                                                                                                                                                                               | National Influenza Center                                                                                                                   | A Nejadi; F Ajaminejad and T Mokhtari Azad; J Yavarian; K Sadeghi; N Ghavvami; NZ Shafiei Jandaghi; V Salimi                                                                                                                                                                                                                     |
| EPI_ISL_528935                                                                                                                                                                                                                                                                                                                                                                                                                                                                                                                                                                                                                                                                                                                           | Agenzia di Tutela della Salute di Bergamo                                                                                                                                                                                                                                                                                                                                                                                         | Istituto Zooprofilattico Sperimentale dell'Abruzzo e Molise "G.Caporale"                                                                    | Ancora M; Cammà C; Curini V; Di Domenico M; Di Pasquale A; Lorusso A; Mangone I; Marcacci M; Puglia I; Rinaldi A; Savini G.                                                                                                                                                                                                      |
| EPI_ISL_500783, EPI_ISL_590952, EPI_ISL_775387, EPI_ISL_1820053, EPI_ISL_2333261                                                                                                                                                                                                                                                                                                                                                                                                                                                                                                                                                                                                                                                         | Akershus University Hospital, Department for Microbiology and Infectious Disease Control                                                                                                                                                                                                                                                                                                                                          | Norwegian Institute of Public Health, Department of Virology                                                                                | *Kathrine Stene-Johansen; Atiya R Ali; Debec Nadia; Engebretsen Serina Beate; Garcia Llorente Ignacio; Hilde Elshaug; Hilde Voilan; Jon Bråte; Kamilla Heddeland Instefjord; Karoline Bragstad; Kathrine Stene-Johansen; Line Victoria Moen; Marie Paulsen Madsen; Olav Hungnes; Pedersen Benedikte Nevjen; Rasmus Riis Kopperud |
| EPI_ISL_625613                                                                                                                                                                                                                                                                                                                                                                                                                                                                                                                                                                                                                                                                                                                           | Alameda County Public Health Lab                                                                                                                                                                                                                                                                                                                                                                                                  | Chan-Zuckerberg Biohub                                                                                                                      | CZB Cliahub Consortium                                                                                                                                                                                                                                                                                                           |
| EPI_ISL_1483588, EPI_ISL_2626698, EPI_ISL_2987166                                                                                                                                                                                                                                                                                                                                                                                                                                                                                                                                                                                                                                                                                        | Alaska State Virology Laboratory                                                                                                                                                                                                                                                                                                                                                                                                  | Alaska State Virology Laboratory                                                                                                            | Elva House; Jack Chen; Jacob Zidek; Lisa Smith; Ph.D.; Stephanie DeRonde                                                                                                                                                                                                                                                         |
| EPI_ISL_2163060, EPI_ISL_2169909                                                                                                                                                                                                                                                                                                                                                                                                                                                                                                                                                                                                                                                                                                         | Alberta Precision Labs (APL)                                                                                                                                                                                                                                                                                                                                                                                                      | Public Health Agency of Canada (PHAC) National Microbiology Laboratory                                                                      | Buss; Croxen M; Deo A; Dieu P; E; Ferrato C; Gill K; Khan F; Koleva P; Li V; Lloyd C; Lynch T; Ma R; Murphy S; Pabbaraju K; Shokoples S; Thayer J; Tipples G; Whitehouse M; Wong A; Yu C; Zelyas N                                                                                                                               |
| EPI_ISL_2375924                                                                                                                                                                                                                                                                                                                                                                                                                                                                                                                                                                                                                                                                                                                          | Albow Gardens Clinic wc ALB                                                                                                                                                                                                                                                                                                                                                                                                       | NHLS/UCT                                                                                                                                    | Arash Iranzadeh; Bruna Galvao; Carolyn Williamson; Deelan Doolabh; Diana Hardie; Innocent Mudau; Kruger Marais; Lynn Tyers; Marvin Hsiao; Stephen Korsman                                                                                                                                                                        |
| EPI_ISL_1385811                                                                                                                                                                                                                                                                                                                                                                                                                                                                                                                                                                                                                                                                                                                          | Alfa Diagnostica LLC                                                                                                                                                                                                                                                                                                                                                                                                              | ONCOGENE LLC                                                                                                                                | ONCOGENE LLC                                                                                                                                                                                                                                                                                                                     |
| EPI_ISL_508174                                                                                                                                                                                                                                                                                                                                                                                                                                                                                                                                                                                                                                                                                                                           | All india institute of Medical Sciences Rishikesh                                                                                                                                                                                                                                                                                                                                                                                 | National Institute of Biomedical Genomics                                                                                                   | Amit Mangla; Arindam Maitra; Deepjyoti Kalita; Ravi Kant; Saumitra Das                                                                                                                                                                                                                                                           |
| EPI_ISL_2375992                                                                                                                                                                                                                                                                                                                                                                                                                                                                                                                                                                                                                                                                                                                          | Alma CDC wc AHC                                                                                                                                                                                                                                                                                                                                                                                                                   | NHLS/UCT                                                                                                                                    | Arash Iranzadeh; Bruna Galvao; Carolyn Williamson; Deelan Doolabh; Diana Hardie; Innocent Mudau; Kruger Marais; Lynn Tyers; Marvin Hsiao; Stephen Korsman                                                                                                                                                                        |
| EPI_ISL_2854052                                                                                                                                                                                                                                                                                                                                                                                                                                                                                                                                                                                                                                                                                                                          | Ampang Hospital                                                                                                                                                                                                                                                                                                                                                                                                                   | Institute for Medical Research, Infectious Disease Research Centre, National Institutes of Health, Ministry of Health Malaysia              | Anasir MI; Azizan MA; Kamel K; Mohd Zawawi Z; Ramly N; Robert F; Suppiah J; Thayan R                                                                                                                                                                                                                                             |
| EPI_ISL_2727238                                                                                                                                                                                                                                                                                                                                                                                                                                                                                                                                                                                                                                                                                                                          | Ampath Greenacres Hospital                                                                                                                                                                                                                                                                                                                                                                                                        | KRISP, KZn Research Innovation and Sequencing Platform                                                                                      | Giandhari Jennifer; Naidoo Yesnhnee; Pillay Sureshnee; San James; Tegally Houriyah; Tshabuila Derek; Wilkinson Eduan; Yajna Ramphal; de Oliveira Tulio                                                                                                                                                                           |
| EPI_ISL_2178783, EPI_ISL_2178785, EPI_ISL_2178788, EPI_ISL_2178789, EPI_ISL_2178793, EPI_ISL_2178794, EPI_ISL_2193359                                                                                                                                                                                                                                                                                                                                                                                                                                                                                                                                                                                                                    | see above                                                                                                                                                                                                                                                                                                                                                                                                                         | Ampath Laboratories                                                                                                                         | Amoako DG; Bhiman JN; Glass A; Gottberg A; Mahlangu B; Marshall T; Mohale T; Ntuli N; Scheepers C; Viana R                                                                                                                                                                                                                       |

| Health Laboratory Service                                                                                                                                                                                                                                                                                                                                                                                                                                                                                                                                                                                                                                                            |                                                                                                       |                                                                                                                                                                                                                                                                                                                                              |                                                                                                                                                                                                                                                                                                                                                                                                                                                                                                                                                                  |
|--------------------------------------------------------------------------------------------------------------------------------------------------------------------------------------------------------------------------------------------------------------------------------------------------------------------------------------------------------------------------------------------------------------------------------------------------------------------------------------------------------------------------------------------------------------------------------------------------------------------------------------------------------------------------------------|-------------------------------------------------------------------------------------------------------|----------------------------------------------------------------------------------------------------------------------------------------------------------------------------------------------------------------------------------------------------------------------------------------------------------------------------------------------|------------------------------------------------------------------------------------------------------------------------------------------------------------------------------------------------------------------------------------------------------------------------------------------------------------------------------------------------------------------------------------------------------------------------------------------------------------------------------------------------------------------------------------------------------------------|
| EPI_ISL_1324593                                                                                                                                                                                                                                                                                                                                                                                                                                                                                                                                                                                                                                                                      | Anteja laboratorija (UAB Diagnostikos laboratorija)                                                   | Vilnius University Hospital Santaros Klinikos, Center of Laboratory Medicine                                                                                                                                                                                                                                                                 | Daniel Naumovas; Dovile Ezerskyte; Gytis Dudas; Ingrida Olen draite; Laimonas Griskevicius; Ligita Raugaite; Mindaugas Stoksus; Monika Katenaite; Rimvydas Norvilas                                                                                                                                                                                                                                                                                                                                                                                              |
| EPI_ISL_1483700                                                                                                                                                                                                                                                                                                                                                                                                                                                                                                                                                                                                                                                                      | Area of Virology, Serology and Virology Division (SAVID), New South Wales Health Pathology Randwick   | Area of Virology, Serology and Virology Division (SAVID), New South Wales Health Pathology Randwick                                                                                                                                                                                                                                          | Au, J.; Bull, R.; Deveson, I.; Foster, C.; Jean, T.; Rawlinson, W.; Ruiz Silva, M.; Van Haal, S.                                                                                                                                                                                                                                                                                                                                                                                                                                                                 |
| EPI_ISL_678312, EPI_ISL_678327, EPI_ISL_678328, EPI_ISL_707898, EPI_ISL_717702, EPI_ISL_1121974, EPI_ISL_1121975, EPI_ISL_1494718, EPI_ISL_1494722, EPI_ISL_1543926, EPI_ISL_1615594, EPI_ISL_1633353, EPI_ISL_2650011                                                                                                                                                                                                                                                                                                                                                                                                                                                               | Area of Virology, Serology and Virology Division (SAVID), New South Wales Health Pathology Randwick   | Virology Research Laboratory; Area of Virology, Serology and Virology Division (SAVID), New South Wales Health Pathology Randwick                                                                                                                                                                                                            | Au, J.; Bull, R.; Deveson, I.; Foster, C.; Rawlinson, W.; Ruiz Silva, M.; Van Hal, S.                                                                                                                                                                                                                                                                                                                                                                                                                                                                            |
| EPI_ISL_2931537, EPI_ISL_2931586                                                                                                                                                                                                                                                                                                                                                                                                                                                                                                                                                                                                                                                     | Arkansas Public Health Laboratory, Arkansas Department of Health                                      | University of Minnesota Genomics Center                                                                                                                                                                                                                                                                                                      | Corbin Dirx; Daryl M. Gohl; Jaquelyn Kuriger-Laber; John Garbe                                                                                                                                                                                                                                                                                                                                                                                                                                                                                                   |
| EPI_ISL_1315065                                                                                                                                                                                                                                                                                                                                                                                                                                                                                                                                                                                                                                                                      | Armed Forces Medical Research Laboratories and Blood Bank, Egypt                                      | Department of Microbial Biotechnology, Genetic Engineering Division, National Research Centre                                                                                                                                                                                                                                                | Ahmed Elsayed; Ahmed Taha; Ayman Farghaly; Mohamed Khalifa; Mohamed Shemis; Reham Dawood                                                                                                                                                                                                                                                                                                                                                                                                                                                                         |
| EPI_ISL_1315064                                                                                                                                                                                                                                                                                                                                                                                                                                                                                                                                                                                                                                                                      | Armed Forces Medical Research Laboratories and Blood Bank, Egypt                                      | Department of Microbial Biotechnology, Genetic Engineering Division, National Research Centre                                                                                                                                                                                                                                                | Ahmed Elsayed; Ahmed Taha; Ayman Farghaly; Mohamed Khalifa; Mohamed Shemis; Reham Dawood                                                                                                                                                                                                                                                                                                                                                                                                                                                                         |
| EPI_ISL_2849763                                                                                                                                                                                                                                                                                                                                                                                                                                                                                                                                                                                                                                                                      | Artic Network workflow-EPI2ME labs                                                                    | King Khalid Bin Abdul Aziz street, South Surra, Kuwait City                                                                                                                                                                                                                                                                                  | Anfal Al-Adwani; Ebaa Al-Adwadi; Hussain Safar; Nada Madi                                                                                                                                                                                                                                                                                                                                                                                                                                                                                                        |
| EPI_ISL_2423528                                                                                                                                                                                                                                                                                                                                                                                                                                                                                                                                                                                                                                                                      | Atlanta VA Medical Center                                                                             | Genomics and Discovery, Respiratory Viruses Branch, Division of Viral Diseases, Centers for Disease Control and Prevention                                                                                                                                                                                                                   | Adam Retchless; Anna Kelleher; Anna Uehara; Brian Lynch; Clinton R. Paden; Dhvani Batra; Haibin Wang; Han Jia Justin Ng; Jasmine Padilla; Jing Zhang; Justin Lee; Krista Queen; Mark Burroughs; Mili Sheth; Morgan Davis; Peter Cook; Rachel Marine; Sarah Nobles; Suxiang Tong; Tara Coalter; Yan Li; Ying Tao                                                                                                                                                                                                                                                  |
| EPI_ISL_413490                                                                                                                                                                                                                                                                                                                                                                                                                                                                                                                                                                                                                                                                       | Auckland Hospital                                                                                     | Institute of Environmental Science and Research (ESR)                                                                                                                                                                                                                                                                                        | Erasmus Smit; Gary McAuliffe; Joep de Lig; Lauren Jelly; Matt Storey; Matthew Blakiston; Sally Roberts; Xiaoyun Ren                                                                                                                                                                                                                                                                                                                                                                                                                                              |
| EPI_ISL_853964, EPI_ISL_1671058, EPI_ISL_1840870, EPI_ISL_1840872, EPI_ISL_1840952, EPI_ISL_1840962, EPI_ISL_2137339, EPI_ISL_2232813, EPI_ISL_2232857, EPI_ISL_2232886, EPI_ISL_2232895, EPI_ISL_2324297, EPI_ISL_2324298, EPI_ISL_2324300, EPI_ISL_2427162, EPI_ISL_2485020, EPI_ISL_2485157, EPI_ISL_2616224, EPI_ISL_2616312, EPI_ISL_2616365, EPI_ISL_2657417, EPI_ISL_2757990, EPI_ISL_2757992, EPI_ISL_2758026, EPI_ISL_2887420, EPI_ISL_2887619, EPI_ISL_2887630, EPI_ISL_2985444, EPI_ISL_3039920, EPI_ISL_3039925                                                                                                                                                          | Berghaler laboratory, CeMM Research Center for Molecular Medicine of the Austrian Academy of Sciences | Alexander Lercher; Alexandra Popa; Andreas Berghaler; Anna Schedl; Bekir Erguner; Benedikt Agerer; Christoph Bock; Christoph Bock; Fabian Amman; Jakob-Wendelin Genger; Jan Laine; Lukas Enderler; Maelle Le Moing; Martin Senekowitsch; Martin Senekowitsch; Matthew Thornton; Michael Schuster; Michael Schuster; Petr Triska; Thomas Penz |                                                                                                                                                                                                                                                                                                                                                                                                                                                                                                                                                                  |
| EPI_ISL_1670599, EPI_ISL_1919625                                                                                                                                                                                                                                                                                                                                                                                                                                                                                                                                                                                                                                                     | Azienda Ospedaliera Terni                                                                             | Istituto Zooprofilattico Sperimentale dell'Abruzzo e Molise "G. Caporale"                                                                                                                                                                                                                                                                    | Ancora M; Calistri P; Cammà C; Caporale M; Curini V; Delli Compagni E; Di Domenico M; Di Lollo Valeria; Di Pasquale A; Lorusso A; Mangone I; Marcacci M; Palumbo M; Puglia I; Rinaldi A; Savini G; Scaccetti A; Scialabba S                                                                                                                                                                                                                                                                                                                                      |
| EPI_ISL_1222791, EPI_ISL_1489770                                                                                                                                                                                                                                                                                                                                                                                                                                                                                                                                                                                                                                                     | Azienda Sanitaria dell'Alto Adige Laboratorio Aziendale di Microbiologia e Virologia                  | Istituto di Genomica Applicata                                                                                                                                                                                                                                                                                                               | Davide Scaglione; Eleonora Paparelli; Elisa Masi; Elisabetta Giacobazzi; Elisabetta Pagani; Gabriele Magris; Irena Jurman; Irene Bianconi; Michele Morgante; Stefanie Wieser; Vera Vendramin                                                                                                                                                                                                                                                                                                                                                                     |
| EPI_ISL_467044                                                                                                                                                                                                                                                                                                                                                                                                                                                                                                                                                                                                                                                                       | B.J. Medical College and Civil hospital                                                               | Gujarat Biotechnology Research Centre                                                                                                                                                                                                                                                                                                        | ; A M Kadri; Ankit Hinsu; Apurvasinh Puvar; Chaitanya Joshi; Dinesh Kumar; Harsh Bakshi; Janvi Raval; Kamlesh J Upadhyay; Komal Patel; Labdhi Pandya; Madhvi Joshi; Maharshi Pandya; Monika Gandhi; Nidhi Patel; Nirav Mungalpara; Nitin Savaliya; Pinal Trivedi; Pranay Shah; Pritesh Sabara; Priti Pandya; R D Dixit; Raghavendra Kumar; Snehal Bagatharia; Tejas Shah; Zarra Patel; Zuber Saied                                                                                                                                                               |
| EPI_ISL_2710311                                                                                                                                                                                                                                                                                                                                                                                                                                                                                                                                                                                                                                                                      | BARC / Lancet                                                                                         | KRISP, KZN Research Innovation and Sequencing Platform                                                                                                                                                                                                                                                                                       | Gandhari Jennifer; Naidoo Yesheene; Pillay Sureshnee; San James; Sisonke; Tegally Houriiyah; Tshabula Derek; Wilkinson Eduan; Yajna Ramphal; de Oliveira Tulio                                                                                                                                                                                                                                                                                                                                                                                                   |
| EPI_ISL_2842230                                                                                                                                                                                                                                                                                                                                                                                                                                                                                                                                                                                                                                                                      | BBMP Urban                                                                                            | INSACOG-KA, NIMHANS                                                                                                                                                                                                                                                                                                                          | Ananthapadmanabha Kotambal; Anita S Desai; Anson Kunjumin George; Chetan G K; Chitra Pattabiraman; Darshan Sreenivas; Ellango Ramasamy; Gautham Arunachal Udipi; Mahesh Kumar.C.S; Sony Sharma; V Ravi                                                                                                                                                                                                                                                                                                                                                           |
| EPI_ISL_1169048                                                                                                                                                                                                                                                                                                                                                                                                                                                                                                                                                                                                                                                                      | BBTKLPP Banjarbaru, Kalimantan Selatan                                                                | National Institute of Health Research and Development                                                                                                                                                                                                                                                                                        | Arie Ardiansyah Nugraha; Hana Aparsi Pawestri; Hartanti Dian Ikawati; Kartika Dewi Puspa; Nelly Puspandari; Subangkit; Vivi Setiawaty                                                                                                                                                                                                                                                                                                                                                                                                                            |
| EPI_ISL_415577, EPI_ISL_418828, EPI_ISL_968754, EPI_ISL_974610, EPI_ISL_974630, EPI_ISL_974656, EPI_ISL_974661, EPI_ISL_975034, EPI_ISL_2499685, EPI_ISL_2522213, EPI_ISL_2530954                                                                                                                                                                                                                                                                                                                                                                                                                                                                                                    | BCCDC Public Health Laboratory                                                                        | BCCDC Public Health Laboratory                                                                                                                                                                                                                                                                                                               | Ana Pacagnella; Choi; Corinne Ng; Dan Fornika; Gilmore; Harrigan; Hoang; John Tyson; Kamelian; Kim Macdonald; Kimia Kamelian; Krajden; Lapointe; Lee; Levett; Li; Linda Hoang; Loman; Loretta Janz; Mel Krajden; Prystajecy; Prystajecy Natalie; Quick; Robert Azana; Robert Azana Terry Snutch; Sekirov; Shannon Russell; Snutch; Tyson                                                                                                                                                                                                                         |
| EPI_ISL_3032332, EPI_ISL_3032333                                                                                                                                                                                                                                                                                                                                                                                                                                                                                                                                                                                                                                                     | BIOFAST                                                                                               | Instituto Butantan                                                                                                                                                                                                                                                                                                                           | Antonio Jorge Martins; Claudia Renata dos Santos Barros; David Schlesinger; Debora Boteguio Moretti; Dimas Tadeu Covas; Elaine Cristina Marquese; Elaine Vieira Santos; Evandra Strazza Rodrigues; Heidge Fukumasu; Jayme Augusto de Souza-Neto; José Salvatore Leister Patané; Luiz Alcantara; Luiz Lehmann Coutinho; Maria Carolina Elias; Maurício Lacerda Nogueira; Rafael dos Santos Bezerra; Raul Machado Neto; Rejane Maria Tommasini Grotto; Ricardo Haddad; Sandra Cocuzzo Sampaio Vessoni; Simone Kashima; Svetoslav Nanev Slavov; Vincent Louis Viala |
| EPI_ISL_2933674                                                                                                                                                                                                                                                                                                                                                                                                                                                                                                                                                                                                                                                                      | BIOMNIS LYON                                                                                          | CNR Virus des Infections Respiratoires - France SUD                                                                                                                                                                                                                                                                                          | Antonin Bal; Bruno Lina; Gregory Destras; Gwendolyne Burfin; Hadrien Regue; Laurence Josset; Martine Valette; Quentin Semanas                                                                                                                                                                                                                                                                                                                                                                                                                                    |
| EPI_ISL_2141965                                                                                                                                                                                                                                                                                                                                                                                                                                                                                                                                                                                                                                                                      | BIOR                                                                                                  | Latvian Biomedical Research and Study Centre                                                                                                                                                                                                                                                                                                 | Daina Pule; Davids Fridmanis; Elina Dimina; Guntars Zarins; Irena Meistere; Ivars Silamikelis; Janis Klovinis; Janis Pjalkovskis; Juris Persevickovs; Kaspars Megnis; Laila Silamikele; Lauma Freimane; Laura Ansona; Liga Birzniece; Monta Ustinova; Nikita Zrelous; Uga Dumpis; Una Krumina; Vita Rovite                                                                                                                                                                                                                                                       |
| EPI_ISL_859567, EPI_ISL_859573, EPI_ISL_859607, EPI_ISL_859642, EPI_ISL_859646, EPI_ISL_859668, EPI_ISL_859695, EPI_ISL_859735, EPI_ISL_859896, EPI_ISL_859900, EPI_ISL_859910, EPI_ISL_859951, EPI_ISL_860061, EPI_ISL_860068, EPI_ISL_860081                                                                                                                                                                                                                                                                                                                                                                                                                                       | BTC, Khalifa University                                                                               | BTC, Khalifa University                                                                                                                                                                                                                                                                                                                      | Al Safar et al                                                                                                                                                                                                                                                                                                                                                                                                                                                                                                                                                   |
| EPI_ISL_1263459                                                                                                                                                                                                                                                                                                                                                                                                                                                                                                                                                                                                                                                                      | BTCLPP Ambon                                                                                          | National Institute of Health Research and Development                                                                                                                                                                                                                                                                                        | Arie Ardiansyah Nugraha; Hana Aparsi Pawestri; Hartanti Dian Ikawati; Kartika Dewi Puspa; Krisna Pangesti; Nelly Puspandari; Subangkit; Vivi Setiawaty                                                                                                                                                                                                                                                                                                                                                                                                           |
| EPI_ISL_2970354                                                                                                                                                                                                                                                                                                                                                                                                                                                                                                                                                                                                                                                                      | Bacterial and Viral Diseases & Biotechnology and Bioinformatics, Armauer Hansen Research Institute    | Bacterial and Viral Diseases & Biotechnology and Bioinformatics, Armauer Hansen Research Institute                                                                                                                                                                                                                                           | A.A.; A.G.; Abdissa, A.; Abebe, M.; Adnew, B.; Alemayehu; Alemu, F.; Bayih; Beyene, D.A.; D.H.; G.; Gelanew, T.; Mihrete, A.; Mulu, A.; Negash; Seyoum, T.; Tefera                                                                                                                                                                                                                                                                                                                                                                                               |
| EPI_ISL_1159375                                                                                                                                                                                                                                                                                                                                                                                                                                                                                                                                                                                                                                                                      | Bahman Hospital                                                                                       | Laboratory of Molecular Biology and Cancer Immunology, Lebanese University Public Health England                                                                                                                                                                                                                                             | Fadi Abdel Sater; Steven Pullan                                                                                                                                                                                                                                                                                                                                                                                                                                                                                                                                  |
| EPI_ISL_2544801                                                                                                                                                                                                                                                                                                                                                                                                                                                                                                                                                                                                                                                                      | Balai Besar Penelitian dan Pengembangan dan Reservoir Penyakit, Salatiga                              | Genomik Solidaritas Indonesia Laboratorium                                                                                                                                                                                                                                                                                                   | Alfin Mohammad Abdullah; Anindya Pradipta Susanto; Annisa Muthiah Sukirman; Anuraj Shankar; Ariel Pradipta; Budi Wieweko; Carissa Sintca Wijaya; Dhalhia Agustina Cahyono; Gracia Felias Enos Korompis; Joko Waluyo; Louisa Markus; Meutia Ayuputeri Kumaheri; Normastuti Adhini Tanty; Pratiwi Sudarmono; Vania Gavriila Wikasa; Yuditirita Aditya Rahmat                                                                                                                                                                                                       |
| EPI_ISL_2343223                                                                                                                                                                                                                                                                                                                                                                                                                                                                                                                                                                                                                                                                      | Banteay Meanchey Rapid Response Team                                                                  | Virology Unit, Institut Pasteur du Cambodge                                                                                                                                                                                                                                                                                                  | Cecile Troupin; Chau Darapeak; Chin Savuth; Erik A Karlsson; Jurre Y Siegers; Kraing Sidonn; Leakhena Pum; Ly Sovann; Veasna Duong; Yi Sengdoeurn                                                                                                                                                                                                                                                                                                                                                                                                                |
| EPI_ISL_766645                                                                                                                                                                                                                                                                                                                                                                                                                                                                                                                                                                                                                                                                       | Barnakuten                                                                                            | The Public Health Agency of Sweden                                                                                                                                                                                                                                                                                                           | Department of Microbiology; The Public Health Agency of Sweden                                                                                                                                                                                                                                                                                                                                                                                                                                                                                                   |
| EPI_ISL_833333                                                                                                                                                                                                                                                                                                                                                                                                                                                                                                                                                                                                                                                                       | Batangas City Health Office                                                                           | Research Institute for Tropical Medicine                                                                                                                                                                                                                                                                                                     | Catalino Demetria; Daria Manalo; Edelwisa Mercado; Francisco Gerardo Polotan; Hannah Leah Morito; Inez Andrea Medado; John Leonard Chan; Kirstyn Brunker; Ma Angelica Tujan; Othniel Jan Onza                                                                                                                                                                                                                                                                                                                                                                    |
| EPI_ISL_2406459, EPI_ISL_2406460                                                                                                                                                                                                                                                                                                                                                                                                                                                                                                                                                                                                                                                     | Battambang Provincial Laboratory                                                                      | Virology Unit, Institut Pasteur du Cambodge                                                                                                                                                                                                                                                                                                  | Cecile Troupin; Chau Darapeak; Chin Savuth; Erik A Karlsson; Jurre Y Siegers; Kraing Sidonn; Leakhena Pum; Ly Sovann; Veasna Duong; Yi Sengdoeurn                                                                                                                                                                                                                                                                                                                                                                                                                |
| EPI_ISL_1117377                                                                                                                                                                                                                                                                                                                                                                                                                                                                                                                                                                                                                                                                      | Beijing Center for Disease Prevention and Control                                                     | Beijing Center for Disease Prevention and Control                                                                                                                                                                                                                                                                                            | Bing Lyu; Daitao Zhang; Fu Li; Lijuan Chen; Quanyi Wang; Shujuan Cui; Yang Pan; Zhaomin Feng; Zhichao Liu                                                                                                                                                                                                                                                                                                                                                                                                                                                        |
| EPI_ISL_529216                                                                                                                                                                                                                                                                                                                                                                                                                                                                                                                                                                                                                                                                       | Beijing Institute of Microbiology and Epidemiology                                                    | Beijing Institute of Microbiology and Epidemiology                                                                                                                                                                                                                                                                                           | Cui, Y.; Fan; Guo, Y.; Hang; Hou, J.; Li, B.; Mi, Z.; Mu, J.; Qin, E.; Song; Teng; Wu, Y.; Xu, Z.; Yajun.; Yang, R.; Yong, Y.; Yue; Zhang, X.                                                                                                                                                                                                                                                                                                                                                                                                                    |
| EPI_ISL_509712                                                                                                                                                                                                                                                                                                                                                                                                                                                                                                                                                                                                                                                                       | Belize Ministry of Health                                                                             | Pathogen Discovery, Respiratory Viruses Branch, Division of Viral Diseases, Centers for Disease Control and Prevention                                                                                                                                                                                                                       | Anna Uehara; Clinton Paden; Haibin Wang; Jing Zhang; Krista Queen; Suxiang Tong; Yan Li; Ying Tao                                                                                                                                                                                                                                                                                                                                                                                                                                                                |
| EPI_ISL_780383, EPI_ISL_780384, EPI_ISL_780398                                                                                                                                                                                                                                                                                                                                                                                                                                                                                                                                                                                                                                       | Bermuda Government Molecular Diagnostics Laboratory (MDL)                                             | Respiratory Virus Unit, National Infection Service, Public Health England                                                                                                                                                                                                                                                                    | Dr Ayoola Oyinloye (Bermuda); Dr Carika Weldon (Bermuda); PHE Covid Sequencing Team                                                                                                                                                                                                                                                                                                                                                                                                                                                                              |
| EPI_ISL_2802860                                                                                                                                                                                                                                                                                                                                                                                                                                                                                                                                                                                                                                                                      | BioMoLab                                                                                              | Microbiologia Molecular, Instituto SELADIS, Universidad Mayor de San Andrés                                                                                                                                                                                                                                                                  | Aneth Vasquez Michel; Carmen Delgado Barrera; Oscar M. Rollano-Peñaloza; Sandra Miranda Sardon                                                                                                                                                                                                                                                                                                                                                                                                                                                                   |
| EPI_ISL_2802858, EPI_ISL_2802859, EPI_ISL_2802863                                                                                                                                                                                                                                                                                                                                                                                                                                                                                                                                                                                                                                    | BioMoLab                                                                                              | Molecular Genetics Laboratory, Instituto de Investigaciones Químicas, Universidad Mayor de San Andrés                                                                                                                                                                                                                                        | Aneth Vasquez Michel; Carmen Delgado Barrera; Oscar M. Rollano-Peñaloza; Sandra Miranda Sardon                                                                                                                                                                                                                                                                                                                                                                                                                                                                   |
| EPI_ISL_1502568, EPI_ISL_1502570, EPI_ISL_2107513, EPI_ISL_2107517                                                                                                                                                                                                                                                                                                                                                                                                                                                                                                                                                                                                                   | Biochemistry and Molecular Biology Department-Faculty of Medicine, Al-Quds University                 | Biochemistry and Molecular Biology Department-Faculty of Medicine, Al-Quds University                                                                                                                                                                                                                                                        | Al-Jawabreh, A.; Dumaidi, K.; Ereqat, S.; Naserddin, A.; Nasereddin, A.                                                                                                                                                                                                                                                                                                                                                                                                                                                                                          |
| EPI_ISL_1707927, EPI_ISL_2878346, EPI_ISL_2878383                                                                                                                                                                                                                                                                                                                                                                                                                                                                                                                                                                                                                                    | Biogroup Bio Lam-CLDC Saint-Denis                                                                     | Department of Virology, Henri Mondor University Hospital, Assistance Publique Hôpitaux de Paris, Université Paris-Est Créteil, INSERM U955                                                                                                                                                                                                   | Alexandre Soulier; Christophe Rodriguez; Elisabeth Trawinski; Guillaume Gricourt; Jean-Michel Pawlowsky; Melissa N'Debi; Slim Fourati; Vanessa Demontant                                                                                                                                                                                                                                                                                                                                                                                                         |
| EPI_ISL_429995, EPI_ISL_430011, EPI_ISL_635778, EPI_ISL_635781, EPI_ISL_730270, EPI_ISL_730479, EPI_ISL_730558, EPI_ISL_730559, EPI_ISL_730562, EPI_ISL_755242, EPI_ISL_878477                                                                                                                                                                                                                                                                                                                                                                                                                                                                                                       | see above                                                                                             | Bioblab Diagnostic Laboratories                                                                                                                                                                                                                                                                                                              | Andersen lab at Scripps Research                                                                                                                                                                                                                                                                                                                                                                                                                                                                                                                                 |
| EPI_ISL_977602, EPI_ISL_1406195, EPI_ISL_1406239, EPI_ISL_1822601, EPI_ISL_1823120, EPI_ISL_1823177, EPI_ISL_1823202, EPI_ISL_2105674, EPI_ISL_2105676, EPI_ISL_2105677, EPI_ISL_2105678, EPI_ISL_2105679, EPI_ISL_2105680, EPI_ISL_2105681, EPI_ISL_2105682, EPI_ISL_2105683, EPI_ISL_2105684, EPI_ISL_2105685, EPI_ISL_2105686, EPI_ISL_2105687, EPI_ISL_2105688, EPI_ISL_2105689, EPI_ISL_2105690, EPI_ISL_2105691, EPI_ISL_2105692, EPI_ISL_2105693, EPI_ISL_2105694, EPI_ISL_2105695, EPI_ISL_2105696, EPI_ISL_2105697, EPI_ISL_2105698, EPI_ISL_2105699, EPI_ISL_2105700, EPI_ISL_2105701, EPI_ISL_2105702, EPI_ISL_2105703, EPI_ISL_2105704, EPI_ISL_2105705, EPI_ISL_2105706 | see above                                                                                             | Bioblab Diagnostic Laboratories                                                                                                                                                                                                                                                                                                              | Ahmad Tibi; Amid Abdelnour with SEARCH Alliance San Diego; Issa Abu-Dayyeh; Lama Hussein; Lina Mohammad; Zein Naber                                                                                                                                                                                                                                                                                                                                                                                                                                              |
| EPI_ISL_527007                                                                                                                                                                                                                                                                                                                                                                                                                                                                                                                                                                                                                                                                       | Biological Prevention, Army                                                                           | Biological Prevention, Army                                                                                                                                                                                                                                                                                                                  | Ahmad Tibi; Amid Abdelnour; Badia Saddedin; Eiad Atwa; Issa Abu-Dayyeh; Lama Hussein; Shaima Ali; Shayma Ali                                                                                                                                                                                                                                                                                                                                                                                                                                                     |
| EPI_ISL_526975, EPI_ISL_526976, EPI_ISL_526977, EPI_ISL_526978, EPI_ISL_526979, EPI_ISL_526980, EPI_ISL_526981, EPI_ISL_526982, EPI_ISL_526983, EPI_ISL_526984, EPI_ISL_526985, EPI_ISL_526986, EPI_ISL_526987, EPI_ISL_526988, EPI_ISL_526989, EPI_ISL_526990, EPI_ISL_526991, EPI_ISL_526992, EPI_ISL_526993, EPI_ISL_526994, EPI_ISL_526995, EPI_ISL_526996, EPI_ISL_526997, EPI_ISL_526998, EPI_ISL_526999                                                                                                                                                                                                                                                                       | see above                                                                                             | Biological prevention, army                                                                                                                                                                                                                                                                                                                  | A.E.; A.F.; A.M.; Ageez; B.E.; Elhoseiny; Gad; Harty; M.D.; M.F.; M.G.; Seadawy; Shabaan; Shamel                                                                                                                                                                                                                                                                                                                                                                                                                                                                 |
| EPI_ISL_510526, EPI_ISL_510532                                                                                                                                                                                                                                                                                                                                                                                                                                                                                                                                                                                                                                                       | Biological prevention, army                                                                           | Biological prevention, army                                                                                                                                                                                                                                                                                                                  | A.E.; A.F.; A.M.; Ageez; B.E.; Elhoseiny; Elhosienny; Gad; Harty; M.D.; M.F.; M.G.; Seadawy; Shabaan; Shamel                                                                                                                                                                                                                                                                                                                                                                                                                                                     |
| EPI_ISL_1524332, EPI_ISL_1524359, EPI_ISL_2931131, EPI_ISL_2931134, EPI_ISL_2931135, EPI_ISL_2931137, EPI_ISL_2931138                                                                                                                                                                                                                                                                                                                                                                                                                                                                                                                                                                | see above                                                                                             | Biological prevention, army                                                                                                                                                                                                                                                                                                                  | A.A.; A.F.; A.M. and Soliman; Ali; Amer; B.E.; B.S.; ELnabrawy; ElGohary; Elhoseiny; Elhoseny; Elnagdy; Elnakeeb; Gad; H.A.; Harty; Hassan; Kandell; Karam; M.A.; M.D.; M.F.; M.G.; M.M. and Gad; Raouf; Seadawy; Shamel; T.A.; W.A.; Y.A.; k.E.                                                                                                                                                                                                                                                                                                                 |
| EPI_ISL_1524332, EPI_ISL_1524359, EPI_ISL_2931131, EPI_ISL_2931134, EPI_ISL_2931135, EPI_ISL_2931137, EPI_ISL_2931138                                                                                                                                                                                                                                                                                                                                                                                                                                                                                                                                                                | see above                                                                                             | Biology Department, College of Science, Al Muthanna University and Public Health Laboratory, Al-Muthanna Health                                                                                                                                                                                                                              | Department of Virology, Faculty of Medicine, University of Helsinki, Helsinki, Finland                                                                                                                                                                                                                                                                                                                                                                                                                                                                           |
| EPI_ISL_1524332, EPI_ISL_1524359, EPI_ISL_2931131, EPI_ISL_2931134, EPI_ISL_2931135, EPI_ISL_2931137, EPI_ISL_2931138                                                                                                                                                                                                                                                                                                                                                                                                                                                                                                                                                                | see above                                                                                             | Biology Department, College of Science, Al Muthanna University and Public Health Laboratory, Al-Muthanna Health                                                                                                                                                                                                                              | Alaa Hameed; Ali Jasim; Batool Kadham Salman; Hussein Alburkat; Hussein Riadh Kitab; Murad Munahi; Nihad Al-Rashedi; Olli Valpalhti; Tarja Sironen; Teemu Smura                                                                                                                                                                                                                                                                                                                                                                                                  |

|                                                                                                                                                                                                                                                                                                                                                                                                                                                                                                                                                                                                                                                                                                                                                                                                                                                                                                                                                                                                                                                                                                                                                                                                                                                                                                                                                                                                                                                                                                                                                                                                                                                                                                                                                                                                                                                                                                                                                                                                                                                                                                                                                                                                                                                                                                                                                                                                                                                                                                                                                                                                                                                                                                                                                                                                                                                                                                                                                                                                                                                                                                                                                                                                                                                                                                                                                                                                                                                                                                                                                                                                                                                                                                                                                                                                                                                                                                                                                                                                                                                                                                                                                                                                                                                                                                                                                                                                                                                                                                                                                                                                                                                                                                                                                                                                                                                                                                                                                                                                                                                                                                                                                                                                                                                                                                                                                                                                                                                                                                                                                                                                                                                                                                                                                                                                                                                                                                                                                                                                                                                                                                                                                                                                                                                                                                                                                                                                                                                                                                                                                                                                                                                                                                                                                                                                                                                                                                                                                                                                                                                                                                                                                                                                                                                                                                                                                                                                                                                                                                                                                                                                                                                                                                                                                                                                                                                                                                                                                                                                                                                                                                                                                                                                                                                                                                                                                                                                                                                                                                                                                                                                                                                                                                                                                                                                                                                                                                                                                                                                                                                                                                                                                                                                                                                                                                                                                                                                                                                                                                                                                                                                                                                                                                                                                                                                                                                                                                                                                                                                                                                                                                                                                                                                                                                                                                                                                                                                                                                                                                                                                                                                                                                                                                                                                                                                                                                                                                                                                                                                                                                                                                                                                                                                                                                                                                                                                                                                                                                                                                                                                                                                                                                                                                                                                                                                                                                                                                                                                                                                                                                                                                                                                                                                                                                                                                                                                                                                                                                                                                                                                                                                                                                                                                                                                                                                                                                                                                                                                                                                                                                                                                                                                                                                                                                                                                                                                                                                                                                                                                                                                                                                                                                                                                                                                                                                                                                                                                                                                                                                                                                                                                                                                                                                                                                                                                                                                                                                                                                                                               |                                                                               |                                                                                                                                            |                                                                                                                                                                                                                       |
|-----------------------------------------------------------------------------------------------------------------------------------------------------------------------------------------------------------------------------------------------------------------------------------------------------------------------------------------------------------------------------------------------------------------------------------------------------------------------------------------------------------------------------------------------------------------------------------------------------------------------------------------------------------------------------------------------------------------------------------------------------------------------------------------------------------------------------------------------------------------------------------------------------------------------------------------------------------------------------------------------------------------------------------------------------------------------------------------------------------------------------------------------------------------------------------------------------------------------------------------------------------------------------------------------------------------------------------------------------------------------------------------------------------------------------------------------------------------------------------------------------------------------------------------------------------------------------------------------------------------------------------------------------------------------------------------------------------------------------------------------------------------------------------------------------------------------------------------------------------------------------------------------------------------------------------------------------------------------------------------------------------------------------------------------------------------------------------------------------------------------------------------------------------------------------------------------------------------------------------------------------------------------------------------------------------------------------------------------------------------------------------------------------------------------------------------------------------------------------------------------------------------------------------------------------------------------------------------------------------------------------------------------------------------------------------------------------------------------------------------------------------------------------------------------------------------------------------------------------------------------------------------------------------------------------------------------------------------------------------------------------------------------------------------------------------------------------------------------------------------------------------------------------------------------------------------------------------------------------------------------------------------------------------------------------------------------------------------------------------------------------------------------------------------------------------------------------------------------------------------------------------------------------------------------------------------------------------------------------------------------------------------------------------------------------------------------------------------------------------------------------------------------------------------------------------------------------------------------------------------------------------------------------------------------------------------------------------------------------------------------------------------------------------------------------------------------------------------------------------------------------------------------------------------------------------------------------------------------------------------------------------------------------------------------------------------------------------------------------------------------------------------------------------------------------------------------------------------------------------------------------------------------------------------------------------------------------------------------------------------------------------------------------------------------------------------------------------------------------------------------------------------------------------------------------------------------------------------------------------------------------------------------------------------------------------------------------------------------------------------------------------------------------------------------------------------------------------------------------------------------------------------------------------------------------------------------------------------------------------------------------------------------------------------------------------------------------------------------------------------------------------------------------------------------------------------------------------------------------------------------------------------------------------------------------------------------------------------------------------------------------------------------------------------------------------------------------------------------------------------------------------------------------------------------------------------------------------------------------------------------------------------------------------------------------------------------------------------------------------------------------------------------------------------------------------------------------------------------------------------------------------------------------------------------------------------------------------------------------------------------------------------------------------------------------------------------------------------------------------------------------------------------------------------------------------------------------------------------------------------------------------------------------------------------------------------------------------------------------------------------------------------------------------------------------------------------------------------------------------------------------------------------------------------------------------------------------------------------------------------------------------------------------------------------------------------------------------------------------------------------------------------------------------------------------------------------------------------------------------------------------------------------------------------------------------------------------------------------------------------------------------------------------------------------------------------------------------------------------------------------------------------------------------------------------------------------------------------------------------------------------------------------------------------------------------------------------------------------------------------------------------------------------------------------------------------------------------------------------------------------------------------------------------------------------------------------------------------------------------------------------------------------------------------------------------------------------------------------------------------------------------------------------------------------------------------------------------------------------------------------------------------------------------------------------------------------------------------------------------------------------------------------------------------------------------------------------------------------------------------------------------------------------------------------------------------------------------------------------------------------------------------------------------------------------------------------------------------------------------------------------------------------------------------------------------------------------------------------------------------------------------------------------------------------------------------------------------------------------------------------------------------------------------------------------------------------------------------------------------------------------------------------------------------------------------------------------------------------------------------------------------------------------------------------------------------------------------------------------------------------------------------------------------------------------------------------------------------------------------------------------------------------------------------------------------------------------------------------------------------------------------------------------------------------------------------------------------------------------------------------------------------------------------------------------------------------------------------------------------------------------------------------------------------------------------------------------------------------------------------------------------------------------------------------------------------------------------------------------------------------------------------------------------------------------------------------------------------------------------------------------------------------------------------------------------------------------------------------------------------------------------------------------------------------------------------------------------------------------------------------------------------------------------------------------------------------------------------------------------------------------------------------------------------------------------------------------------------------------------------------------------------------------------------------------------------------------------------------------------------------------------------------------------------------------------------------------------------------------------------------------------------------------------------------------------------------------------------------------------------------------------------------------------------------------------------------------------------------------------------------------------------------------------------------------------------------------------------------------------------------------------------------------------------------------------------------------------------------------------------------------------------------------------------------------------------------------------------------------------------------------------------------------------------------------------------------------------------------------------------------------------------------------------------------------------------------------------------------------------------------------------------------------------------------------------------------------------------------------------------------------------------------------------------------------------------------------------------------------------------------------------------------------------------------------------------------------------------------------------------------------------------------------------------------------------------------------------------------------------------------------------------------------------------------------------------------------------------------------------------------------------------------------------------------------------------------------------------------------------------------------------------------------------------------------------------------------------------------------------------------------------------------------------------------------------------------------------------------------------------------------------------------------------------------------------------------------------------------------------------------------------------------------------------------------------------------------------------------------------------------------------------------------------------------------------------------------------------------------------------------------------------------------------------------------------------------------------------------------------------------------------------------------------------------------------------------------------------------------------------------------------------------------------------------------------------------------------------------------------------------------------------------------------------------------------------------------------------------------------------------------------------------------------------------------------------------------------------------------------------------------------------------------------------------------------------------------------------------------------------------------------------------------------------------------------------------------------------------------------------------------------------------------------------------------------------------------------------------------------------------------------------------------------------------------------------------------------------------------------------------------------------------------------------------------------------------------------------------------------------------------------------------------------------------------------------------------------------------------------------------|-------------------------------------------------------------------------------|--------------------------------------------------------------------------------------------------------------------------------------------|-----------------------------------------------------------------------------------------------------------------------------------------------------------------------------------------------------------------------|
| EPI_ISL_582030                                                                                                                                                                                                                                                                                                                                                                                                                                                                                                                                                                                                                                                                                                                                                                                                                                                                                                                                                                                                                                                                                                                                                                                                                                                                                                                                                                                                                                                                                                                                                                                                                                                                                                                                                                                                                                                                                                                                                                                                                                                                                                                                                                                                                                                                                                                                                                                                                                                                                                                                                                                                                                                                                                                                                                                                                                                                                                                                                                                                                                                                                                                                                                                                                                                                                                                                                                                                                                                                                                                                                                                                                                                                                                                                                                                                                                                                                                                                                                                                                                                                                                                                                                                                                                                                                                                                                                                                                                                                                                                                                                                                                                                                                                                                                                                                                                                                                                                                                                                                                                                                                                                                                                                                                                                                                                                                                                                                                                                                                                                                                                                                                                                                                                                                                                                                                                                                                                                                                                                                                                                                                                                                                                                                                                                                                                                                                                                                                                                                                                                                                                                                                                                                                                                                                                                                                                                                                                                                                                                                                                                                                                                                                                                                                                                                                                                                                                                                                                                                                                                                                                                                                                                                                                                                                                                                                                                                                                                                                                                                                                                                                                                                                                                                                                                                                                                                                                                                                                                                                                                                                                                                                                                                                                                                                                                                                                                                                                                                                                                                                                                                                                                                                                                                                                                                                                                                                                                                                                                                                                                                                                                                                                                                                                                                                                                                                                                                                                                                                                                                                                                                                                                                                                                                                                                                                                                                                                                                                                                                                                                                                                                                                                                                                                                                                                                                                                                                                                                                                                                                                                                                                                                                                                                                                                                                                                                                                                                                                                                                                                                                                                                                                                                                                                                                                                                                                                                                                                                                                                                                                                                                                                                                                                                                                                                                                                                                                                                                                                                                                                                                                                                                                                                                                                                                                                                                                                                                                                                                                                                                                                                                                                                                                                                                                                                                                                                                                                                                                                                                                                                                                                                                                                                                                                                                                                                                                                                                                                                                                                                                                                                                                                                                                                                                                                                                                                                                                                                                                                                                                | Directorate<br>Biology Department, College of Science, Al-Muthanna University | International Centre for Genetic Engineering and Biotechnology (ICGEB) and ARGO Open Lab Platform                                          | Alessandro Marcello; Danilo Licastro; Nihad Al-Rashedi; Simeone Dal Monego; Sreejith Rajasekharan                                                                                                                     |
| EPI_ISL_1015369                                                                                                                                                                                                                                                                                                                                                                                                                                                                                                                                                                                                                                                                                                                                                                                                                                                                                                                                                                                                                                                                                                                                                                                                                                                                                                                                                                                                                                                                                                                                                                                                                                                                                                                                                                                                                                                                                                                                                                                                                                                                                                                                                                                                                                                                                                                                                                                                                                                                                                                                                                                                                                                                                                                                                                                                                                                                                                                                                                                                                                                                                                                                                                                                                                                                                                                                                                                                                                                                                                                                                                                                                                                                                                                                                                                                                                                                                                                                                                                                                                                                                                                                                                                                                                                                                                                                                                                                                                                                                                                                                                                                                                                                                                                                                                                                                                                                                                                                                                                                                                                                                                                                                                                                                                                                                                                                                                                                                                                                                                                                                                                                                                                                                                                                                                                                                                                                                                                                                                                                                                                                                                                                                                                                                                                                                                                                                                                                                                                                                                                                                                                                                                                                                                                                                                                                                                                                                                                                                                                                                                                                                                                                                                                                                                                                                                                                                                                                                                                                                                                                                                                                                                                                                                                                                                                                                                                                                                                                                                                                                                                                                                                                                                                                                                                                                                                                                                                                                                                                                                                                                                                                                                                                                                                                                                                                                                                                                                                                                                                                                                                                                                                                                                                                                                                                                                                                                                                                                                                                                                                                                                                                                                                                                                                                                                                                                                                                                                                                                                                                                                                                                                                                                                                                                                                                                                                                                                                                                                                                                                                                                                                                                                                                                                                                                                                                                                                                                                                                                                                                                                                                                                                                                                                                                                                                                                                                                                                                                                                                                                                                                                                                                                                                                                                                                                                                                                                                                                                                                                                                                                                                                                                                                                                                                                                                                                                                                                                                                                                                                                                                                                                                                                                                                                                                                                                                                                                                                                                                                                                                                                                                                                                                                                                                                                                                                                                                                                                                                                                                                                                                                                                                                                                                                                                                                                                                                                                                                                                                                                                                                                                                                                                                                                                                                                                                                                                                                                                                                                                                               | Biology Lab, HIA PERCY                                                        | IRBA, 2MI                                                                                                                                  | FOISSAUD V.; GORGE O.; NOLENT F.; SARILAR V.                                                                                                                                                                          |
| EPI_ISL_907076, EPI_ISL_907077, EPI_ISL_907078, EPI_ISL_907079, EPI_ISL_907080, EPI_ISL_907081, EPI_ISL_907082, EPI_ISL_907083, EPI_ISL_907084, EPI_ISL_907085                                                                                                                                                                                                                                                                                                                                                                                                                                                                                                                                                                                                                                                                                                                                                                                                                                                                                                                                                                                                                                                                                                                                                                                                                                                                                                                                                                                                                                                                                                                                                                                                                                                                                                                                                                                                                                                                                                                                                                                                                                                                                                                                                                                                                                                                                                                                                                                                                                                                                                                                                                                                                                                                                                                                                                                                                                                                                                                                                                                                                                                                                                                                                                                                                                                                                                                                                                                                                                                                                                                                                                                                                                                                                                                                                                                                                                                                                                                                                                                                                                                                                                                                                                                                                                                                                                                                                                                                                                                                                                                                                                                                                                                                                                                                                                                                                                                                                                                                                                                                                                                                                                                                                                                                                                                                                                                                                                                                                                                                                                                                                                                                                                                                                                                                                                                                                                                                                                                                                                                                                                                                                                                                                                                                                                                                                                                                                                                                                                                                                                                                                                                                                                                                                                                                                                                                                                                                                                                                                                                                                                                                                                                                                                                                                                                                                                                                                                                                                                                                                                                                                                                                                                                                                                                                                                                                                                                                                                                                                                                                                                                                                                                                                                                                                                                                                                                                                                                                                                                                                                                                                                                                                                                                                                                                                                                                                                                                                                                                                                                                                                                                                                                                                                                                                                                                                                                                                                                                                                                                                                                                                                                                                                                                                                                                                                                                                                                                                                                                                                                                                                                                                                                                                                                                                                                                                                                                                                                                                                                                                                                                                                                                                                                                                                                                                                                                                                                                                                                                                                                                                                                                                                                                                                                                                                                                                                                                                                                                                                                                                                                                                                                                                                                                                                                                                                                                                                                                                                                                                                                                                                                                                                                                                                                                                                                                                                                                                                                                                                                                                                                                                                                                                                                                                                                                                                                                                                                                                                                                                                                                                                                                                                                                                                                                                                                                                                                                                                                                                                                                                                                                                                                                                                                                                                                                                                                                                                                                                                                                                                                                                                                                                                                                                                                                                                                                                                                                | see above                                                                     | Biology, MCL                                                                                                                               | A.F.; A.N.; Elhoseiny; Gad; M.D.; M.F.; M.G.; Seadawy; Shamel; Zekri                                                                                                                                                  |
| EPI_ISL_794634                                                                                                                                                                                                                                                                                                                                                                                                                                                                                                                                                                                                                                                                                                                                                                                                                                                                                                                                                                                                                                                                                                                                                                                                                                                                                                                                                                                                                                                                                                                                                                                                                                                                                                                                                                                                                                                                                                                                                                                                                                                                                                                                                                                                                                                                                                                                                                                                                                                                                                                                                                                                                                                                                                                                                                                                                                                                                                                                                                                                                                                                                                                                                                                                                                                                                                                                                                                                                                                                                                                                                                                                                                                                                                                                                                                                                                                                                                                                                                                                                                                                                                                                                                                                                                                                                                                                                                                                                                                                                                                                                                                                                                                                                                                                                                                                                                                                                                                                                                                                                                                                                                                                                                                                                                                                                                                                                                                                                                                                                                                                                                                                                                                                                                                                                                                                                                                                                                                                                                                                                                                                                                                                                                                                                                                                                                                                                                                                                                                                                                                                                                                                                                                                                                                                                                                                                                                                                                                                                                                                                                                                                                                                                                                                                                                                                                                                                                                                                                                                                                                                                                                                                                                                                                                                                                                                                                                                                                                                                                                                                                                                                                                                                                                                                                                                                                                                                                                                                                                                                                                                                                                                                                                                                                                                                                                                                                                                                                                                                                                                                                                                                                                                                                                                                                                                                                                                                                                                                                                                                                                                                                                                                                                                                                                                                                                                                                                                                                                                                                                                                                                                                                                                                                                                                                                                                                                                                                                                                                                                                                                                                                                                                                                                                                                                                                                                                                                                                                                                                                                                                                                                                                                                                                                                                                                                                                                                                                                                                                                                                                                                                                                                                                                                                                                                                                                                                                                                                                                                                                                                                                                                                                                                                                                                                                                                                                                                                                                                                                                                                                                                                                                                                                                                                                                                                                                                                                                                                                                                                                                                                                                                                                                                                                                                                                                                                                                                                                                                                                                                                                                                                                                                                                                                                                                                                                                                                                                                                                                                                                                                                                                                                                                                                                                                                                                                                                                                                                                                                                                                                | Biology, MCL                                                                  | Biology, MCL                                                                                                                               | A.F.; A.S.; B.S. and EL-Safy; EL-harty; EL-hosienny; Gad; M.D.; M.F.; M.G.; Seadawy; Shamel                                                                                                                           |
| EPI_ISL_1420697                                                                                                                                                                                                                                                                                                                                                                                                                                                                                                                                                                                                                                                                                                                                                                                                                                                                                                                                                                                                                                                                                                                                                                                                                                                                                                                                                                                                                                                                                                                                                                                                                                                                                                                                                                                                                                                                                                                                                                                                                                                                                                                                                                                                                                                                                                                                                                                                                                                                                                                                                                                                                                                                                                                                                                                                                                                                                                                                                                                                                                                                                                                                                                                                                                                                                                                                                                                                                                                                                                                                                                                                                                                                                                                                                                                                                                                                                                                                                                                                                                                                                                                                                                                                                                                                                                                                                                                                                                                                                                                                                                                                                                                                                                                                                                                                                                                                                                                                                                                                                                                                                                                                                                                                                                                                                                                                                                                                                                                                                                                                                                                                                                                                                                                                                                                                                                                                                                                                                                                                                                                                                                                                                                                                                                                                                                                                                                                                                                                                                                                                                                                                                                                                                                                                                                                                                                                                                                                                                                                                                                                                                                                                                                                                                                                                                                                                                                                                                                                                                                                                                                                                                                                                                                                                                                                                                                                                                                                                                                                                                                                                                                                                                                                                                                                                                                                                                                                                                                                                                                                                                                                                                                                                                                                                                                                                                                                                                                                                                                                                                                                                                                                                                                                                                                                                                                                                                                                                                                                                                                                                                                                                                                                                                                                                                                                                                                                                                                                                                                                                                                                                                                                                                                                                                                                                                                                                                                                                                                                                                                                                                                                                                                                                                                                                                                                                                                                                                                                                                                                                                                                                                                                                                                                                                                                                                                                                                                                                                                                                                                                                                                                                                                                                                                                                                                                                                                                                                                                                                                                                                                                                                                                                                                                                                                                                                                                                                                                                                                                                                                                                                                                                                                                                                                                                                                                                                                                                                                                                                                                                                                                                                                                                                                                                                                                                                                                                                                                                                                                                                                                                                                                                                                                                                                                                                                                                                                                                                                                                                                                                                                                                                                                                                                                                                                                                                                                                                                                                                                                                               | Biomedical Research Foundation of the Academy of Athens (BRFAA)               | Greek Genome Center, Biomedical Research Foundation of the Academy of Athens (BRFAA)                                                       | Dimitrios Thanos; Emmanouil Athanasiadis; Ioannis Vatsellas; Katerina Zoi; Theodoros Loupis                                                                                                                           |
| EPI_ISL_2401515                                                                                                                                                                                                                                                                                                                                                                                                                                                                                                                                                                                                                                                                                                                                                                                                                                                                                                                                                                                                                                                                                                                                                                                                                                                                                                                                                                                                                                                                                                                                                                                                                                                                                                                                                                                                                                                                                                                                                                                                                                                                                                                                                                                                                                                                                                                                                                                                                                                                                                                                                                                                                                                                                                                                                                                                                                                                                                                                                                                                                                                                                                                                                                                                                                                                                                                                                                                                                                                                                                                                                                                                                                                                                                                                                                                                                                                                                                                                                                                                                                                                                                                                                                                                                                                                                                                                                                                                                                                                                                                                                                                                                                                                                                                                                                                                                                                                                                                                                                                                                                                                                                                                                                                                                                                                                                                                                                                                                                                                                                                                                                                                                                                                                                                                                                                                                                                                                                                                                                                                                                                                                                                                                                                                                                                                                                                                                                                                                                                                                                                                                                                                                                                                                                                                                                                                                                                                                                                                                                                                                                                                                                                                                                                                                                                                                                                                                                                                                                                                                                                                                                                                                                                                                                                                                                                                                                                                                                                                                                                                                                                                                                                                                                                                                                                                                                                                                                                                                                                                                                                                                                                                                                                                                                                                                                                                                                                                                                                                                                                                                                                                                                                                                                                                                                                                                                                                                                                                                                                                                                                                                                                                                                                                                                                                                                                                                                                                                                                                                                                                                                                                                                                                                                                                                                                                                                                                                                                                                                                                                                                                                                                                                                                                                                                                                                                                                                                                                                                                                                                                                                                                                                                                                                                                                                                                                                                                                                                                                                                                                                                                                                                                                                                                                                                                                                                                                                                                                                                                                                                                                                                                                                                                                                                                                                                                                                                                                                                                                                                                                                                                                                                                                                                                                                                                                                                                                                                                                                                                                                                                                                                                                                                                                                                                                                                                                                                                                                                                                                                                                                                                                                                                                                                                                                                                                                                                                                                                                                                                                                                                                                                                                                                                                                                                                                                                                                                                                                                                                                                                               | BioneXt Lab                                                                   | Laboratoire national de sante, Microbiologie, Microbial Genomics Platform                                                                  | Anke Wiencke-Baldacchino; Catherine Ragimbeau; Fatu Djabi; Jessica Tapp; Lise Pignon; Raoul Salmon; Tamir Abdelrahman; Thibault Ferrandon                                                                             |
| EPI_ISL_2878374, EPI_ISL_2984054                                                                                                                                                                                                                                                                                                                                                                                                                                                                                                                                                                                                                                                                                                                                                                                                                                                                                                                                                                                                                                                                                                                                                                                                                                                                                                                                                                                                                                                                                                                                                                                                                                                                                                                                                                                                                                                                                                                                                                                                                                                                                                                                                                                                                                                                                                                                                                                                                                                                                                                                                                                                                                                                                                                                                                                                                                                                                                                                                                                                                                                                                                                                                                                                                                                                                                                                                                                                                                                                                                                                                                                                                                                                                                                                                                                                                                                                                                                                                                                                                                                                                                                                                                                                                                                                                                                                                                                                                                                                                                                                                                                                                                                                                                                                                                                                                                                                                                                                                                                                                                                                                                                                                                                                                                                                                                                                                                                                                                                                                                                                                                                                                                                                                                                                                                                                                                                                                                                                                                                                                                                                                                                                                                                                                                                                                                                                                                                                                                                                                                                                                                                                                                                                                                                                                                                                                                                                                                                                                                                                                                                                                                                                                                                                                                                                                                                                                                                                                                                                                                                                                                                                                                                                                                                                                                                                                                                                                                                                                                                                                                                                                                                                                                                                                                                                                                                                                                                                                                                                                                                                                                                                                                                                                                                                                                                                                                                                                                                                                                                                                                                                                                                                                                                                                                                                                                                                                                                                                                                                                                                                                                                                                                                                                                                                                                                                                                                                                                                                                                                                                                                                                                                                                                                                                                                                                                                                                                                                                                                                                                                                                                                                                                                                                                                                                                                                                                                                                                                                                                                                                                                                                                                                                                                                                                                                                                                                                                                                                                                                                                                                                                                                                                                                                                                                                                                                                                                                                                                                                                                                                                                                                                                                                                                                                                                                                                                                                                                                                                                                                                                                                                                                                                                                                                                                                                                                                                                                                                                                                                                                                                                                                                                                                                                                                                                                                                                                                                                                                                                                                                                                                                                                                                                                                                                                                                                                                                                                                                                                                                                                                                                                                                                                                                                                                                                                                                                                                                                                                                                              | Biopole Antilles                                                              | Department of Virology, Henri Mondor University Hospital, Assistance Publique Hôpitaux de Paris, Université Paris-Est Créteil, INSERM U955 | Alexandre Soulier; Christophe Rodriguez; Elisabeth Trawinski; Guillaume Gricourt; Jean-Michel Pawlowsky; Melissa N'Debi; Slim Fourati; Vanessa Demontant                                                              |
| EPI_ISL_1140703, EPI_ISL_1211107, EPI_ISL_1211289, EPI_ISL_1211353, EPI_ISL_1212796, EPI_ISL_1216676, EPI_ISL_1282001, EPI_ISL_1282133, EPI_ISL_1282295, EPI_ISL_1284692, EPI_ISL_1353663, EPI_ISL_1439255, EPI_ISL_1721811, EPI_ISL_2633951, EPI_ISL_2634081, EPI_ISL_2637135                                                                                                                                                                                                                                                                                                                                                                                                                                                                                                                                                                                                                                                                                                                                                                                                                                                                                                                                                                                                                                                                                                                                                                                                                                                                                                                                                                                                                                                                                                                                                                                                                                                                                                                                                                                                                                                                                                                                                                                                                                                                                                                                                                                                                                                                                                                                                                                                                                                                                                                                                                                                                                                                                                                                                                                                                                                                                                                                                                                                                                                                                                                                                                                                                                                                                                                                                                                                                                                                                                                                                                                                                                                                                                                                                                                                                                                                                                                                                                                                                                                                                                                                                                                                                                                                                                                                                                                                                                                                                                                                                                                                                                                                                                                                                                                                                                                                                                                                                                                                                                                                                                                                                                                                                                                                                                                                                                                                                                                                                                                                                                                                                                                                                                                                                                                                                                                                                                                                                                                                                                                                                                                                                                                                                                                                                                                                                                                                                                                                                                                                                                                                                                                                                                                                                                                                                                                                                                                                                                                                                                                                                                                                                                                                                                                                                                                                                                                                                                                                                                                                                                                                                                                                                                                                                                                                                                                                                                                                                                                                                                                                                                                                                                                                                                                                                                                                                                                                                                                                                                                                                                                                                                                                                                                                                                                                                                                                                                                                                                                                                                                                                                                                                                                                                                                                                                                                                                                                                                                                                                                                                                                                                                                                                                                                                                                                                                                                                                                                                                                                                                                                                                                                                                                                                                                                                                                                                                                                                                                                                                                                                                                                                                                                                                                                                                                                                                                                                                                                                                                                                                                                                                                                                                                                                                                                                                                                                                                                                                                                                                                                                                                                                                                                                                                                                                                                                                                                                                                                                                                                                                                                                                                                                                                                                                                                                                                                                                                                                                                                                                                                                                                                                                                                                                                                                                                                                                                                                                                                                                                                                                                                                                                                                                                                                                                                                                                                                                                                                                                                                                                                                                                                                                                                                                                                                                                                                                                                                                                                                                                                                                                                                                                                                                                                                | see above                                                                     | Bioscientia Labor Wermsdorf                                                                                                                | Robert Koch Institute                                                                                                                                                                                                 |
| EPI_ISL_1284823, EPI_ISL_1432947, EPI_ISL_1721133, EPI_ISL_1848523, EPI_ISL_1848543, EPI_ISL_2109502, EPI_ISL_2121932, EPI_ISL_2122022, EPI_ISL_2125493, EPI_ISL_2125560, EPI_ISL_2126008, EPI_ISL_2260272, EPI_ISL_2265701, EPI_ISL_2265849, EPI_ISL_2265853, EPI_ISL_2313390, EPI_ISL_2313636, EPI_ISL_2632395, EPI_ISL_2632447, EPI_ISL_2632460, EPI_ISL_2632554                                                                                                                                                                                                                                                                                                                                                                                                                                                                                                                                                                                                                                                                                                                                                                                                                                                                                                                                                                                                                                                                                                                                                                                                                                                                                                                                                                                                                                                                                                                                                                                                                                                                                                                                                                                                                                                                                                                                                                                                                                                                                                                                                                                                                                                                                                                                                                                                                                                                                                                                                                                                                                                                                                                                                                                                                                                                                                                                                                                                                                                                                                                                                                                                                                                                                                                                                                                                                                                                                                                                                                                                                                                                                                                                                                                                                                                                                                                                                                                                                                                                                                                                                                                                                                                                                                                                                                                                                                                                                                                                                                                                                                                                                                                                                                                                                                                                                                                                                                                                                                                                                                                                                                                                                                                                                                                                                                                                                                                                                                                                                                                                                                                                                                                                                                                                                                                                                                                                                                                                                                                                                                                                                                                                                                                                                                                                                                                                                                                                                                                                                                                                                                                                                                                                                                                                                                                                                                                                                                                                                                                                                                                                                                                                                                                                                                                                                                                                                                                                                                                                                                                                                                                                                                                                                                                                                                                                                                                                                                                                                                                                                                                                                                                                                                                                                                                                                                                                                                                                                                                                                                                                                                                                                                                                                                                                                                                                                                                                                                                                                                                                                                                                                                                                                                                                                                                                                                                                                                                                                                                                                                                                                                                                                                                                                                                                                                                                                                                                                                                                                                                                                                                                                                                                                                                                                                                                                                                                                                                                                                                                                                                                                                                                                                                                                                                                                                                                                                                                                                                                                                                                                                                                                                                                                                                                                                                                                                                                                                                                                                                                                                                                                                                                                                                                                                                                                                                                                                                                                                                                                                                                                                                                                                                                                                                                                                                                                                                                                                                                                                                                                                                                                                                                                                                                                                                                                                                                                                                                                                                                                                                                                                                                                                                                                                                                                                                                                                                                                                                                                                                                                                                                                                                                                                                                                                                                                                                                                                                                                                                                                                                                                                                           | see above                                                                     | Bioscientia MVZ Labor Karlsruhe GmbH                                                                                                       | Robert Koch Institute                                                                                                                                                                                                 |
| EPI_ISL_1970307                                                                                                                                                                                                                                                                                                                                                                                                                                                                                                                                                                                                                                                                                                                                                                                                                                                                                                                                                                                                                                                                                                                                                                                                                                                                                                                                                                                                                                                                                                                                                                                                                                                                                                                                                                                                                                                                                                                                                                                                                                                                                                                                                                                                                                                                                                                                                                                                                                                                                                                                                                                                                                                                                                                                                                                                                                                                                                                                                                                                                                                                                                                                                                                                                                                                                                                                                                                                                                                                                                                                                                                                                                                                                                                                                                                                                                                                                                                                                                                                                                                                                                                                                                                                                                                                                                                                                                                                                                                                                                                                                                                                                                                                                                                                                                                                                                                                                                                                                                                                                                                                                                                                                                                                                                                                                                                                                                                                                                                                                                                                                                                                                                                                                                                                                                                                                                                                                                                                                                                                                                                                                                                                                                                                                                                                                                                                                                                                                                                                                                                                                                                                                                                                                                                                                                                                                                                                                                                                                                                                                                                                                                                                                                                                                                                                                                                                                                                                                                                                                                                                                                                                                                                                                                                                                                                                                                                                                                                                                                                                                                                                                                                                                                                                                                                                                                                                                                                                                                                                                                                                                                                                                                                                                                                                                                                                                                                                                                                                                                                                                                                                                                                                                                                                                                                                                                                                                                                                                                                                                                                                                                                                                                                                                                                                                                                                                                                                                                                                                                                                                                                                                                                                                                                                                                                                                                                                                                                                                                                                                                                                                                                                                                                                                                                                                                                                                                                                                                                                                                                                                                                                                                                                                                                                                                                                                                                                                                                                                                                                                                                                                                                                                                                                                                                                                                                                                                                                                                                                                                                                                                                                                                                                                                                                                                                                                                                                                                                                                                                                                                                                                                                                                                                                                                                                                                                                                                                                                                                                                                                                                                                                                                                                                                                                                                                                                                                                                                                                                                                                                                                                                                                                                                                                                                                                                                                                                                                                                                                                                                                                                                                                                                                                                                                                                                                                                                                                                                                                                                                                               | Biotechnology Division, NCDCC Delhi                                           | NCDCC Delhi, Biotechnology Division                                                                                                        | Hema Gogia; Hemlata Lall; Kalaiarasan Ponnusamy; Mahesh S Dhar; Manoj K Singh; Meena Datta; Partha Rakshit; Preeti Madan; Priyanka Singh; Radhakrishnan V. S; Robin Marwal; Sandhya Kabra; Sujeet K Singh; Uma Sharma |
| EPI_ISL_745169                                                                                                                                                                                                                                                                                                                                                                                                                                                                                                                                                                                                                                                                                                                                                                                                                                                                                                                                                                                                                                                                                                                                                                                                                                                                                                                                                                                                                                                                                                                                                                                                                                                                                                                                                                                                                                                                                                                                                                                                                                                                                                                                                                                                                                                                                                                                                                                                                                                                                                                                                                                                                                                                                                                                                                                                                                                                                                                                                                                                                                                                                                                                                                                                                                                                                                                                                                                                                                                                                                                                                                                                                                                                                                                                                                                                                                                                                                                                                                                                                                                                                                                                                                                                                                                                                                                                                                                                                                                                                                                                                                                                                                                                                                                                                                                                                                                                                                                                                                                                                                                                                                                                                                                                                                                                                                                                                                                                                                                                                                                                                                                                                                                                                                                                                                                                                                                                                                                                                                                                                                                                                                                                                                                                                                                                                                                                                                                                                                                                                                                                                                                                                                                                                                                                                                                                                                                                                                                                                                                                                                                                                                                                                                                                                                                                                                                                                                                                                                                                                                                                                                                                                                                                                                                                                                                                                                                                                                                                                                                                                                                                                                                                                                                                                                                                                                                                                                                                                                                                                                                                                                                                                                                                                                                                                                                                                                                                                                                                                                                                                                                                                                                                                                                                                                                                                                                                                                                                                                                                                                                                                                                                                                                                                                                                                                                                                                                                                                                                                                                                                                                                                                                                                                                                                                                                                                                                                                                                                                                                                                                                                                                                                                                                                                                                                                                                                                                                                                                                                                                                                                                                                                                                                                                                                                                                                                                                                                                                                                                                                                                                                                                                                                                                                                                                                                                                                                                                                                                                                                                                                                                                                                                                                                                                                                                                                                                                                                                                                                                                                                                                                                                                                                                                                                                                                                                                                                                                                                                                                                                                                                                                                                                                                                                                                                                                                                                                                                                                                                                                                                                                                                                                                                                                                                                                                                                                                                                                                                                                                                                                                                                                                                                                                                                                                                                                                                                                                                                                                                                                                | Bishop Lavis CDC wc BLP                                                       | National Health Laboratory Service (NHLS), Tygerberg                                                                                       | Bronwyn Kleinhans; Eduan Wanjikoi; Gert van Zyl; Houriiyah Tegally; Kayla Delaney; Susan Engelbrecht; Tulio de Oliveira; Wolfgang Preiser                                                                             |
| EPI_ISL_2380020, EPI_ISL_2608398                                                                                                                                                                                                                                                                                                                                                                                                                                                                                                                                                                                                                                                                                                                                                                                                                                                                                                                                                                                                                                                                                                                                                                                                                                                                                                                                                                                                                                                                                                                                                                                                                                                                                                                                                                                                                                                                                                                                                                                                                                                                                                                                                                                                                                                                                                                                                                                                                                                                                                                                                                                                                                                                                                                                                                                                                                                                                                                                                                                                                                                                                                                                                                                                                                                                                                                                                                                                                                                                                                                                                                                                                                                                                                                                                                                                                                                                                                                                                                                                                                                                                                                                                                                                                                                                                                                                                                                                                                                                                                                                                                                                                                                                                                                                                                                                                                                                                                                                                                                                                                                                                                                                                                                                                                                                                                                                                                                                                                                                                                                                                                                                                                                                                                                                                                                                                                                                                                                                                                                                                                                                                                                                                                                                                                                                                                                                                                                                                                                                                                                                                                                                                                                                                                                                                                                                                                                                                                                                                                                                                                                                                                                                                                                                                                                                                                                                                                                                                                                                                                                                                                                                                                                                                                                                                                                                                                                                                                                                                                                                                                                                                                                                                                                                                                                                                                                                                                                                                                                                                                                                                                                                                                                                                                                                                                                                                                                                                                                                                                                                                                                                                                                                                                                                                                                                                                                                                                                                                                                                                                                                                                                                                                                                                                                                                                                                                                                                                                                                                                                                                                                                                                                                                                                                                                                                                                                                                                                                                                                                                                                                                                                                                                                                                                                                                                                                                                                                                                                                                                                                                                                                                                                                                                                                                                                                                                                                                                                                                                                                                                                                                                                                                                                                                                                                                                                                                                                                                                                                                                                                                                                                                                                                                                                                                                                                                                                                                                                                                                                                                                                                                                                                                                                                                                                                                                                                                                                                                                                                                                                                                                                                                                                                                                                                                                                                                                                                                                                                                                                                                                                                                                                                                                                                                                                                                                                                                                                                                                                                                                                                                                                                                                                                                                                                                                                                                                                                                                                                                                                              | Borneo Medical Centre                                                         | Institute of Health and Community Medicine                                                                                                 | Chan Chia Jui; Chua Hock Hin; David Perera; Ooi Mong How; Tonni Sia Loong Loong; Wong Jyn Shan; Wong King Aik                                                                                                         |
| EPI_ISL_871872, EPI_ISL_968214, EPI_ISL_1516831, EPI_ISL_1516846, EPI_ISL_1516847, EPI_ISL_2233458, EPI_ISL_2233463, EPI_ISL_2372269, EPI_ISL_2372270, EPI_ISL_2372271, EPI_ISL_2372273, EPI_ISL_2372275, EPI_ISL_2372276, EPI_ISL_2372277, EPI_ISL_2372280, EPI_ISL_2372283, EPI_ISL_2372286, EPI_ISL_2372287, EPI_ISL_2372294, EPI_ISL_2372297, EPI_ISL_2372299, EPI_ISL_2372305, EPI_ISL_2386153, EPI_ISL_2386154, EPI_ISL_2504067, EPI_ISL_2504068, EPI_ISL_2504069, EPI_ISL_2504072, EPI_ISL_2504074, EPI_ISL_2504075, EPI_ISL_2504077, EPI_ISL_2504080, EPI_ISL_2504082, EPI_ISL_2504084, EPI_ISL_2504087, EPI_ISL_2566206, EPI_ISL_2566207, EPI_ISL_2566208, EPI_ISL_2566209, EPI_ISL_2648202, EPI_ISL_2820337, EPI_ISL_2820338, EPI_ISL_2820339, EPI_ISL_2820341, EPI_ISL_2820342, EPI_ISL_2820343, EPI_ISL_2820344, EPI_ISL_2820345, EPI_ISL_2820346, EPI_ISL_2820347, EPI_ISL_2820348, EPI_ISL_2820349, EPI_ISL_2820350, EPI_ISL_2820351, EPI_ISL_2820352, EPI_ISL_2820353, EPI_ISL_2820354, EPI_ISL_2820357, EPI_ISL_2820358, EPI_ISL_2820359, EPI_ISL_2820361, EPI_ISL_2820362, EPI_ISL_2820363, EPI_ISL_2820364, EPI_ISL_2820365, EPI_ISL_2820366, EPI_ISL_2820367, EPI_ISL_2820368, EPI_ISL_2820370, EPI_ISL_2820371, EPI_ISL_2820372, EPI_ISL_2820373, EPI_ISL_2820374, EPI_ISL_2820375, EPI_ISL_2820376, EPI_ISL_2820377, EPI_ISL_2820378, EPI_ISL_2820379, EPI_ISL_2820380, EPI_ISL_2820381, EPI_ISL_2820382, EPI_ISL_2820383, EPI_ISL_2820384, EPI_ISL_2820385, EPI_ISL_2820386, EPI_ISL_2820387, EPI_ISL_2820388, EPI_ISL_2820389, EPI_ISL_2820390, EPI_ISL_2820391, EPI_ISL_2820392, EPI_ISL_2820393, EPI_ISL_2820394, EPI_ISL_2820395, EPI_ISL_2820396, EPI_ISL_2820397, EPI_ISL_2820398, EPI_ISL_2820399, EPI_ISL_2820400, EPI_ISL_2820401, EPI_ISL_2820402, EPI_ISL_2820403, EPI_ISL_2820404, EPI_ISL_2820405, EPI_ISL_2820406, EPI_ISL_2820407, EPI_ISL_2820408, EPI_ISL_2820409, EPI_ISL_2820410, EPI_ISL_2820411, EPI_ISL_2820412, EPI_ISL_2820413, EPI_ISL_2820414, EPI_ISL_2820415, EPI_ISL_2820416, EPI_ISL_2820417, EPI_ISL_2820418, EPI_ISL_2820419, EPI_ISL_2820420, EPI_ISL_2820421, EPI_ISL_2820422, EPI_ISL_2820423, EPI_ISL_2820424, EPI_ISL_2820425, EPI_ISL_2820426, EPI_ISL_2820427, EPI_ISL_2820428, EPI_ISL_2820429, EPI_ISL_2820430, EPI_ISL_2820431, EPI_ISL_2820432, EPI_ISL_2820433, EPI_ISL_2820434, EPI_ISL_2820435, EPI_ISL_2820436, EPI_ISL_2820437, EPI_ISL_2820438, EPI_ISL_2820439, EPI_ISL_2820440, EPI_ISL_2820441, EPI_ISL_2820442, EPI_ISL_2820443, EPI_ISL_2820444, EPI_ISL_2820445, EPI_ISL_2820446, EPI_ISL_2820447, EPI_ISL_2820448, EPI_ISL_2820449, EPI_ISL_2820450, EPI_ISL_2820451, EPI_ISL_2820452, EPI_ISL_2820453, EPI_ISL_2820454, EPI_ISL_2820455, EPI_ISL_2820456, EPI_ISL_2820457, EPI_ISL_2820458, EPI_ISL_2820459, EPI_ISL_2820460, EPI_ISL_2820461, EPI_ISL_2820462, EPI_ISL_2820463, EPI_ISL_2820464, EPI_ISL_2820465, EPI_ISL_2820466, EPI_ISL_2820467, EPI_ISL_2820468, EPI_ISL_2820469, EPI_ISL_2820470, EPI_ISL_2820471, EPI_ISL_2820472, EPI_ISL_2820473, EPI_ISL_2820474, EPI_ISL_2820475, EPI_ISL_2820476, EPI_ISL_2820477, EPI_ISL_2820478, EPI_ISL_2820479, EPI_ISL_2820480, EPI_ISL_2820481, EPI_ISL_2820482, EPI_ISL_2820483, EPI_ISL_2820484, EPI_ISL_2820485, EPI_ISL_2820486, EPI_ISL_2820487, EPI_ISL_2820488, EPI_ISL_2820489, EPI_ISL_2820490, EPI_ISL_2820491, EPI_ISL_2820492, EPI_ISL_2820493, EPI_ISL_2820494, EPI_ISL_2820495, EPI_ISL_2820496, EPI_ISL_2820497, EPI_ISL_2820498, EPI_ISL_2820499, EPI_ISL_2820500, EPI_ISL_2820501, EPI_ISL_2820502, EPI_ISL_2820503, EPI_ISL_2820504, EPI_ISL_2820505, EPI_ISL_2820506, EPI_ISL_2820507, EPI_ISL_2820508, EPI_ISL_2820509, EPI_ISL_2820510, EPI_ISL_2820511, EPI_ISL_2820512, EPI_ISL_2820513, EPI_ISL_2820514, EPI_ISL_2820515, EPI_ISL_2820516, EPI_ISL_2820517, EPI_ISL_2820518, EPI_ISL_2820519, EPI_ISL_2820520, EPI_ISL_2820521, EPI_ISL_2820522, EPI_ISL_2820523, EPI_ISL_2820524, EPI_ISL_2820525, EPI_ISL_2820526, EPI_ISL_2820527, EPI_ISL_2820528, EPI_ISL_2820529, EPI_ISL_2820530, EPI_ISL_2820531, EPI_ISL_2820532, EPI_ISL_2820533, EPI_ISL_2820534, EPI_ISL_2820535, EPI_ISL_2820536, EPI_ISL_2820537, EPI_ISL_2820538, EPI_ISL_2820539, EPI_ISL_2820540, EPI_ISL_2820541, EPI_ISL_2820542, EPI_ISL_2820543, EPI_ISL_2820544, EPI_ISL_2820545, EPI_ISL_2820546, EPI_ISL_2820547, EPI_ISL_2820548, EPI_ISL_2820549, EPI_ISL_2820550, EPI_ISL_2820551, EPI_ISL_2820552, EPI_ISL_2820553, EPI_ISL_2820554, EPI_ISL_2820555, EPI_ISL_2820556, EPI_ISL_2820557, EPI_ISL_2820558, EPI_ISL_2820559, EPI_ISL_2820560, EPI_ISL_2820561, EPI_ISL_2820562, EPI_ISL_2820563, EPI_ISL_2820564, EPI_ISL_2820565, EPI_ISL_2820566, EPI_ISL_2820567, EPI_ISL_2820568, EPI_ISL_2820569, EPI_ISL_2820570, EPI_ISL_2820571, EPI_ISL_2820572, EPI_ISL_2820573, EPI_ISL_2820574, EPI_ISL_2820575, EPI_ISL_2820576, EPI_ISL_2820577, EPI_ISL_2820578, EPI_ISL_2820579, EPI_ISL_2820580, EPI_ISL_2820581, EPI_ISL_2820582, EPI_ISL_2820583, EPI_ISL_2820584, EPI_ISL_2820585, EPI_ISL_2820586, EPI_ISL_2820587, EPI_ISL_2820588, EPI_ISL_2820589, EPI_ISL_2820590, EPI_ISL_2820591, EPI_ISL_2820592, EPI_ISL_2820593, EPI_ISL_2820594, EPI_ISL_2820595, EPI_ISL_2820596, EPI_ISL_2820597, EPI_ISL_2820598, EPI_ISL_2820599, EPI_ISL_2820600, EPI_ISL_2820601, EPI_ISL_2820602, EPI_ISL_2820603, EPI_ISL_2820604, EPI_ISL_2820605, EPI_ISL_2820606, EPI_ISL_2820607, EPI_ISL_2820608, EPI_ISL_2820609, EPI_ISL_2820610, EPI_ISL_2820611, EPI_ISL_2820612, EPI_ISL_2820613, EPI_ISL_2820614, EPI_ISL_2820615, EPI_ISL_2820616, EPI_ISL_2820617, EPI_ISL_2820618, EPI_ISL_2820619, EPI_ISL_2820620, EPI_ISL_2820621, EPI_ISL_2820622, EPI_ISL_2820623, EPI_ISL_2820624, EPI_ISL_2820625, EPI_ISL_2820626, EPI_ISL_2820627, EPI_ISL_2820628, EPI_ISL_2820629, EPI_ISL_2820630, EPI_ISL_2820631, EPI_ISL_2820632, EPI_ISL_2820633, EPI_ISL_2820634, EPI_ISL_2820635, EPI_ISL_2820636, EPI_ISL_2820637, EPI_ISL_2820638, EPI_ISL_2820639, EPI_ISL_2820640, EPI_ISL_2820641, EPI_ISL_2820642, EPI_ISL_2820643, EPI_ISL_2820644, EPI_ISL_2820645, EPI_ISL_2820646, EPI_ISL_2820647, EPI_ISL_2820648, EPI_ISL_2820649, EPI_ISL_2820650, EPI_ISL_2820651, EPI_ISL_2820652, EPI_ISL_2820653, EPI_ISL_2820654, EPI_ISL_2820655, EPI_ISL_2820656, EPI_ISL_2820657, EPI_ISL_2820658, EPI_ISL_2820659, EPI_ISL_2820660, EPI_ISL_2820661, EPI_ISL_2820662, EPI_ISL_2820663, EPI_ISL_2820664, EPI_ISL_2820665, EPI_ISL_2820666, EPI_ISL_2820667, EPI_ISL_2820668, EPI_ISL_2820669, EPI_ISL_2820670, EPI_ISL_2820671, EPI_ISL_2820672, EPI_ISL_2820673, EPI_ISL_2820674, EPI_ISL_2820675, EPI_ISL_2820676, EPI_ISL_2820677, EPI_ISL_2820678, EPI_ISL_2820679, EPI_ISL_2820680, EPI_ISL_2820681, EPI_ISL_2820682, EPI_ISL_2820683, EPI_ISL_2820684, EPI_ISL_2820685, EPI_ISL_2820686, EPI_ISL_2820687, EPI_ISL_2820688, EPI_ISL_2820689, EPI_ISL_2820690, EPI_ISL_2820691, EPI_ISL_2820692, EPI_ISL_2820693, EPI_ISL_2820694, EPI_ISL_2820695, EPI_ISL_2820696, EPI_ISL_2820697, EPI_ISL_2820698, EPI_ISL_2820699, EPI_ISL_2820700, EPI_ISL_2820701, EPI_ISL_2820702, EPI_ISL_2820703, EPI_ISL_2820704, EPI_ISL_2820705, EPI_ISL_2820706, EPI_ISL_2820707, EPI_ISL_2820708, EPI_ISL_2820709, EPI_ISL_2820710, EPI_ISL_2820711, EPI_ISL_2820712, EPI_ISL_2820713, EPI_ISL_2820714, EPI_ISL_2820715, EPI_ISL_2820716, EPI_ISL_2820717, EPI_ISL_2820718, EPI_ISL_2820719, EPI_ISL_2820720, EPI_ISL_2820721, EPI_ISL_2820722, EPI_ISL_2820723, EPI_ISL_2820724, EPI_ISL_2820725, EPI_ISL_2820726, EPI_ISL_2820727, EPI_ISL_2820728, EPI_ISL_2820729, EPI_ISL_2820730, EPI_ISL_2820731, EPI_ISL_2820732, EPI_ISL_2820733, EPI_ISL_2820734, EPI_ISL_2820735, EPI_ISL_2820736, EPI_ISL_2820737, EPI_ISL_2820738, EPI_ISL_2820739, EPI_ISL_2820740, EPI_ISL_2820741, EPI_ISL_2820742, EPI_ISL_2820743, EPI_ISL_2820744, EPI_ISL_2820745, EPI_ISL_2820746, EPI_ISL_2820747, EPI_ISL_2820748, EPI_ISL_2820749, EPI_ISL_2820750, EPI_ISL_2820751, EPI_ISL_2820752, EPI_ISL_2820753, EPI_ISL_2820754, EPI_ISL_2820755, EPI_ISL_2820756, EPI_ISL_2820757, EPI_ISL_2820758, EPI_ISL_2820759, EPI_ISL_2820760, EPI_ISL_2820761, EPI_ISL_2820762, EPI_ISL_2820763, EPI_ISL_2820764, EPI_ISL_2820765, EPI_ISL_2820766, EPI_ISL_2820767, EPI_ISL_2820768, EPI_ISL_2820769, EPI_ISL_2820770, EPI_ISL_2820771, EPI_ISL_2820772, EPI_ISL_2820773, EPI_ISL_2820774, EPI_ISL_2820775, EPI_ISL_2820776, EPI_ISL_2820777, EPI_ISL_2820778, EPI_ISL_2820779, EPI_ISL_2820780, EPI_ISL_2820781, EPI_ISL_2820782, EPI_ISL_2820783, EPI_ISL_2820784, EPI_ISL_2820785, EPI_ISL_2820786, EPI_ISL_2820787, EPI_ISL_2820788, EPI_ISL_2820789, EPI_ISL_2820790, EPI_ISL_2820791, EPI_ISL_2820792, EPI_ISL_2820793, EPI_ISL_2820794, EPI_ISL_2820795, EPI_ISL_2820796, EPI_ISL_2820797, EPI_ISL_2820798, EPI_ISL_2820799, EPI_ISL_2820800, EPI_ISL_2820801, EPI_ISL_2820802, EPI_ISL_2820803, EPI_ISL_2820804, EPI_ISL_2820805, EPI_ISL_2820806, EPI_ISL_2820807, EPI_ISL_2820808, EPI_ISL_2820809, EPI_ISL_2820810, EPI_ISL_2820811, EPI_ISL_2820812, EPI_ISL_2820813, EPI_ISL_2820814, EPI_ISL_2820815, EPI_ISL_2820816, EPI_ISL_2820817, EPI_ISL_2820818, EPI_ISL_2820819, EPI_ISL_2820820, EPI_ISL_2820821, EPI_ISL_2820822, EPI_ISL_2820823, EPI_ISL_2820824, EPI_ISL_2820825, EPI_ISL_2820826, EPI_ISL_2820827, EPI_ISL_2820828, EPI_ISL_2820829, EPI_ISL_2820830, EPI_ISL_2820831, EPI_ISL_2820832, EPI_ISL_2820833, EPI_ISL_2820834, EPI_ISL_2820835, EPI_ISL_2820836, EPI_ISL_2820837, EPI_ISL_2820838, EPI_ISL_2820839, EPI_ISL_2820840, EPI_ISL_2820841, EPI_ISL_2820842, EPI_ISL_2820843, EPI_ISL_2820844, EPI_ISL_2820845, EPI_ISL_2820846, EPI_ISL_2820847, EPI_ISL_2820848, EPI_ISL_2820849, EPI_ISL_2820850, EPI_ISL_2820851, EPI_ISL_2820852, EPI_ISL_2820853, EPI_ISL_2820854, EPI_ISL_2820855, EPI_ISL_2820856, EPI_ISL_2820857, EPI_ISL_2820858, EPI_ISL_2820859, EPI_ISL_2820860, EPI_ISL_2820861, EPI_ISL_2820862, EPI_ISL_2820863, EPI_ISL_2820864, EPI_ISL_2820865, EPI_ISL_2820866, EPI_ISL_2820867, EPI_ISL_2820868, EPI_ISL_2820869, EPI_ISL_2820870, EPI_ISL_2820871, EPI_ISL_2820872, EPI_ISL_2820873, EPI_ISL_2820874, EPI_ISL_2820875, EPI_ISL_2820876, EPI_ISL_2820877, EPI_ISL_2820878, EPI_ISL_2820879, EPI_ISL_2820880, EPI_ISL_2820881, EPI_ISL_2820882, EPI_ISL_2820883, EPI_ISL_2820884, EPI_ISL_2820885, EPI_ISL_2820886, EPI_ISL_2820887, EPI_ISL_2820888, EPI_ISL_2820889, EPI_ISL_2820890, EPI_ISL_2820891, EPI_ISL_2820892, EPI_ISL_2820893, EPI_ISL_2820894, EPI_ISL_2820895, EPI_ISL_2820896, EPI_ISL_2820897, EPI_ISL_2820898, EPI_ISL_2820899, EPI_ISL_2820900, EPI_ISL_2820901, EPI_ISL_2820902, EPI_ISL_2820903, EPI_ISL_2820904, EPI_ISL_2820905, EPI_ISL_2820906, EPI_ISL_2820907, EPI_ISL_2820908, EPI_ISL_2820909, EPI_ISL_2820910, EPI_ISL_2820911, EPI_ISL_2820912, EPI_ISL_2820913, EPI_ISL_2820914, EPI_ISL_2820915, EPI_ISL_2820916, EPI_ISL_2820917, EPI_ISL_2820918, EPI_ISL_2820919, EPI_ISL_2820920, EPI_ISL_2820921, EPI_ISL_2820922, EPI_ISL_2820923, EPI_ISL_2820924, EPI_ISL_2820925, EPI_ISL_2820926, EPI_ISL_2820927, EPI_ISL_2820928, EPI_ISL_2820929, EPI_ISL_2820930, EPI_ISL_2820931, EPI_ISL_2820932, EPI_ISL_2820933, EPI_ISL_2820934, EPI_ISL_2820935, EPI_ISL_2820936, EPI_ISL_2820937, EPI_ISL_2820938, EPI_ISL_2820939, EPI_ISL_2820940, EPI_ISL_2820941, EPI_ISL_2820942, EPI_ISL_2820943, EPI_ISL_2820944, EPI_ISL_2820945, EPI_ISL_2820946, EPI_ISL_2820947, EPI_ISL_2820948, EPI_ISL_2820949, EPI_ISL_2820950, EPI_ISL_2820951, EPI_ISL_2820952, EPI_ISL_2820953, EPI_ISL_2820954, EPI_ISL_2820955, EPI_ISL_2820956, EPI_ISL_2820957, EPI_ISL_2820958, EPI_ISL_2820959, EPI_ISL_2820960, EPI_ISL_2820961, EPI_ISL_2820962, EPI_ISL_2820963, EPI_ISL_2820964, EPI_ISL_2820965, EPI_ISL_2820966, EPI_ISL_2820967, EPI_ISL_2820968, EPI_ISL_2820969, EPI_ISL_2820970, EPI_ISL_2820971, EPI_ISL_2820972, EPI_ISL_2820973, EPI_ISL_2820974, EPI_ISL_2820975, EPI_ISL_2820976, EPI_ISL_2820977, EPI_ISL_2820978, EPI_ISL_2820979, EPI_ISL_2820980, EPI_ISL_2820981, EPI_ISL_2820982, EPI_ISL_2820983, EPI_ISL_2820984, EPI_ISL_2820985, EPI_ISL_2820986, EPI_ISL_2820987, EPI_ISL_2820988, EPI_ISL_2820989, EPI_ISL_2820990, EPI_ISL_2820991, EPI_ISL_2820992, EPI_ISL_2820993, EPI_ISL_2820994, EPI_ISL_2820995, EPI_ISL_2820996, EPI_ISL_2820997, EPI_ISL_2820998, EPI_ISL_2820999, EPI_ISL_2821000, EPI_ISL_2821001, EPI_ISL_2821002, EPI_ISL_2821003, EPI_ISL_2821004, EPI_ISL_2821005, EPI_ISL_2821006, EPI_ISL_2821007, EPI_ISL_2821008, EPI_ISL_2821009, EPI_ISL_2821010, EPI_ISL_2821011, EPI_ISL_2821012, EPI_ISL_2821013, EPI_ISL_2821014, EPI_ISL_2821015, EPI_ISL_2821016, EPI_ISL_2821017, EPI_ISL_2821018, EPI_ISL_2821019, EPI_ISL_2821020, EPI_ISL_2821021, EPI_ISL_2821022, EPI_ISL_2821023, EPI_ISL_2821024, EPI_ISL_2821025, EPI_ISL_2821026, EPI_ISL_2821027, EPI_ISL_2821028, EPI_ISL_2821029, EPI_ISL_2821030, EPI_ISL_2821031, EPI_ISL_2821032, EPI_ISL_2821033, EPI_ISL_2821034, EPI_ISL_2821035, EPI_ISL_2821036, EPI_ISL_2821037, EPI_ISL_2821038, EPI_ISL_2821039, EPI_ISL_2821040, EPI_ISL_2821041, EPI_ISL_2821042, EPI_ISL_2821043, EPI_ISL_2821044, EPI_ISL_2821045, EPI_ISL_2821046, EPI_ISL_2821047, EPI_ISL_2821048, EPI_ISL_2821049, EPI_ISL_2821050, EPI_ISL_2821051, EPI_ISL_2821052, EPI_ISL_2821053, EPI_ISL_2821054, EPI_ISL_2821055, EPI_ISL_2821056, EPI_ISL_2821057, EPI_ISL_2821058, EPI_ISL_2821059, EPI_ISL_2821060, EPI_ISL_2821061, EPI_ISL_2821062, EPI_ISL_2821063, EPI_ISL_2821064, EPI_ISL_2821065, EPI_ISL_2821066, EPI_ISL_2821067, EPI_ISL_2821068, EPI_ISL_2821069, EPI_ISL_2821070, EPI_ISL_2821071, EPI_ISL_2821072, EPI_ISL_2821073, EPI_ISL_2821074, EPI_ISL_2821075, EPI_ISL_2821076, EPI_ISL_2821077, EPI_ISL_2821078, EPI_ISL_2821079, EPI_ISL_2821080, EPI_ISL_2821081, EPI_ISL_2821082, EPI_ISL_2821083, EPI_ISL_2821084, EPI_ISL_2821085, EPI_ISL_2821086, EPI_ISL_2821087, EPI_ISL_2821088, EPI_ISL_2821089, EPI_ISL_2821090, EPI_ISL_2821091, EPI_ISL_2821092, EPI_ISL_2821093, EPI_ISL_2821094, EPI_ISL_2821095, EPI_ISL_2821096, EPI_ISL_2821097, EPI_ISL_2821098, EPI_ISL_2821099, EPI_ISL_2821100, EPI_ISL_2821101, EPI_ISL_2821102, EPI_ISL_2821103, EPI_ISL_2821104, EPI_ISL_2821105, EPI_ISL_2821106, EPI_ISL_2821107, EPI_ISL_2821108, EPI_ISL_2821109, EPI_ISL_2821110, EPI_ISL_2821111, EPI_ISL_2821112, EPI_ISL_2821113, EPI_ISL_2821114, EPI_ISL_2821115, EPI_ISL_2821116, EPI_ISL_2821117, EPI_ISL_2821118, EPI_ISL_2821119, EPI_ISL_28211 |                                                                               |                                                                                                                                            |                                                                                                                                                                                                                       |

|                                                                                                                                                                                                                                                                                                                                                                                                                                                                                                                                                                                                                                                                                                                                                                                                                                                                                                                                                                                                                                                                                                                                                                                                                                                                                                                                                                                                                                                                                                                                                                                                                                                                                                                                                                                                                                                                                                                                                                                                                                                                                                                                                                                                                                                                                                                                                                                                                                                                                                                                                                                                                                                                                                                                                                                                                                                                                                                                                                                                                                                                                                                                                                                                                                                                                                                                                                                                                                                                                                                                                                                                                                                                                                                                                                                                                                                                                                                                                                                                                                                                                                                                                                                                                                                                                                                                                                                                                                                                                                                                                                                                                                                                                                                                                                                                                                                                                                                                                                                                                                                                                                                                                                                                                                                                                                                                                                                                                                                                                                                                                                                                                                                                                                                                                                                                                                                                                                                                                                                                                                                                                                                                                                                                                                                                                                                                                                                                                                                                                                                                                                                                                                                                                                                                                                                                                                                                                                                                                                                                                                                                                                                                                                                                                                                                                                                                                                                                                                                                                                                                                                                                                                                                                                                                                                                                                                                                                                                                                                                                                                                                                                                                                                                                                                                                                                                                                                                                                                                                                                                                                                                                                                                                                                                                                                                                                                                                                                                                                                                                                                                                                                                                                                                                                                                                                                                                                                                                                                                                                                                                                                                                                                                                                                                                                                                                                                                                                                                                                                                                                                                                                                                                                                                                                                                                                                                                                                                                                                                                                                                                                                                                                                                                                                                                                                                                                                                                                                                                                                                                                                                                                                                                                                                                                                                                                                                                                                                                                                                                                                                                                                                                                                                                                                                                                                                                                                                                                                                                                                                                                                                                                                                                                                                                                                                                                                                                                                                                                                                                                                                                                                                                                                                                                                                                                                                                                                                                                                                                                                                                                                                                                                                                                                                                                                                                                                                                                                                                                                                                                                                                                                                                                                                                                                                                                                                                                                                                                                                                                                                                                                                                                                                                                                                                                                                                                                                                                                                                                                                                                                                                                                                                                                                                                                                                               |                                                                                  |                                                                                    |                                                                                                                                                                                                                                                                                                                                                                                                                                                                          |
|-----------------------------------------------------------------------------------------------------------------------------------------------------------------------------------------------------------------------------------------------------------------------------------------------------------------------------------------------------------------------------------------------------------------------------------------------------------------------------------------------------------------------------------------------------------------------------------------------------------------------------------------------------------------------------------------------------------------------------------------------------------------------------------------------------------------------------------------------------------------------------------------------------------------------------------------------------------------------------------------------------------------------------------------------------------------------------------------------------------------------------------------------------------------------------------------------------------------------------------------------------------------------------------------------------------------------------------------------------------------------------------------------------------------------------------------------------------------------------------------------------------------------------------------------------------------------------------------------------------------------------------------------------------------------------------------------------------------------------------------------------------------------------------------------------------------------------------------------------------------------------------------------------------------------------------------------------------------------------------------------------------------------------------------------------------------------------------------------------------------------------------------------------------------------------------------------------------------------------------------------------------------------------------------------------------------------------------------------------------------------------------------------------------------------------------------------------------------------------------------------------------------------------------------------------------------------------------------------------------------------------------------------------------------------------------------------------------------------------------------------------------------------------------------------------------------------------------------------------------------------------------------------------------------------------------------------------------------------------------------------------------------------------------------------------------------------------------------------------------------------------------------------------------------------------------------------------------------------------------------------------------------------------------------------------------------------------------------------------------------------------------------------------------------------------------------------------------------------------------------------------------------------------------------------------------------------------------------------------------------------------------------------------------------------------------------------------------------------------------------------------------------------------------------------------------------------------------------------------------------------------------------------------------------------------------------------------------------------------------------------------------------------------------------------------------------------------------------------------------------------------------------------------------------------------------------------------------------------------------------------------------------------------------------------------------------------------------------------------------------------------------------------------------------------------------------------------------------------------------------------------------------------------------------------------------------------------------------------------------------------------------------------------------------------------------------------------------------------------------------------------------------------------------------------------------------------------------------------------------------------------------------------------------------------------------------------------------------------------------------------------------------------------------------------------------------------------------------------------------------------------------------------------------------------------------------------------------------------------------------------------------------------------------------------------------------------------------------------------------------------------------------------------------------------------------------------------------------------------------------------------------------------------------------------------------------------------------------------------------------------------------------------------------------------------------------------------------------------------------------------------------------------------------------------------------------------------------------------------------------------------------------------------------------------------------------------------------------------------------------------------------------------------------------------------------------------------------------------------------------------------------------------------------------------------------------------------------------------------------------------------------------------------------------------------------------------------------------------------------------------------------------------------------------------------------------------------------------------------------------------------------------------------------------------------------------------------------------------------------------------------------------------------------------------------------------------------------------------------------------------------------------------------------------------------------------------------------------------------------------------------------------------------------------------------------------------------------------------------------------------------------------------------------------------------------------------------------------------------------------------------------------------------------------------------------------------------------------------------------------------------------------------------------------------------------------------------------------------------------------------------------------------------------------------------------------------------------------------------------------------------------------------------------------------------------------------------------------------------------------------------------------------------------------------------------------------------------------------------------------------------------------------------------------------------------------------------------------------------------------------------------------------------------------------------------------------------------------------------------------------------------------------------------------------------------------------------------------------------------------------------------------------------------------------------------------------------------------------------------------------------------------------------------------------------------------------------------------------------------------------------------------------------------------------------------------------------------------------------------------------------------------------------------------------------------------------------------------------------------------------------------------------------------------------------------------------------------------------------------------------------------------------------------------------------------------------------------------------------------------------------------------------------------------------------------------------------------------------------------------------------------------------------------------------------------------------------------------------------------------------------------------------------------------------------------------------------------------------------------------------------------------------------------------------------------------------------------------------------------------------------------------------------------------------------------------------------------------------------------------------------------------------------------------------------------------------------------------------------------------------------------------------------------------------------------------------------------------------------------------------------------------------------------------------------------------------------------------------------------------------------------------------------------------------------------------------------------------------------------------------------------------------------------------------------------------------------------------------------------------------------------------------------------------------------------------------------------------------------------------------------------------------------------------------------------------------------------------------------------------------------------------------------------------------------------------------------------------------------------------------------------------------------------------------------------------------------------------------------------------------------------------------------------------------------------------------------------------------------------------------------------------------------------------------------------------------------------------------------------------------------------------------------------------------------------------------------------------------------------------------------------------------------------------------------------------------------------------------------------------------------------------------------------------------------------------------------------------------------------------------------------------------------------------------------------------------------------------------------------------------------------------------------------------------------------------------------------------------------------------------------------------------------------------------------------------------------------------------------------------------------------------------------------------------------------------------------------------------------------------------------------------------------------------------------------------------------------------------------------------------------------------------------------------------------------------------------------------------------------------------------------------------------------------------------------------------------------------------------------------------------------------------------------------------------------------------------------------------------------------------------------------------------------------------------------------------------------------------------------------------------------------------------------------------------------------------------------------------------------------------------------------------------------------------------------------------------------------------------------------------------------------------------------------------------------------------------------------------------------------------------------------------------------------------------------------------------------------------------------------------------------------------------------------------------------------------------------------------------------------------------------------------------------------------------------------------------------------------------------------------------------------------------------------------------------------------------------------------------------------------------------------------------------------------------------------------------------------------------------------------------------------------------------------------------------------------------------------------------------------------------------------------------------------------------------------------------------------------------------------------------------------------------------------------------------------------------------------------------------------------------------------------------------------------------------------------------------------------------------------------------------------------------------------------------------------------------------------------------------------------------------------------------------------------------------------------------------------------------------------------------------------------------------------------------------------------------------------------------------------------------------------------------------------------------------------------------------------------------------------------------------------------------------------------------------------------------------------------------------------------------------------------------------------------------------------------------------------------------------------------------------------------------------------------------------------------------------------------------------------------|----------------------------------------------------------------------------------|------------------------------------------------------------------------------------|--------------------------------------------------------------------------------------------------------------------------------------------------------------------------------------------------------------------------------------------------------------------------------------------------------------------------------------------------------------------------------------------------------------------------------------------------------------------------|
| EPI_ISL_2484798                                                                                                                                                                                                                                                                                                                                                                                                                                                                                                                                                                                                                                                                                                                                                                                                                                                                                                                                                                                                                                                                                                                                                                                                                                                                                                                                                                                                                                                                                                                                                                                                                                                                                                                                                                                                                                                                                                                                                                                                                                                                                                                                                                                                                                                                                                                                                                                                                                                                                                                                                                                                                                                                                                                                                                                                                                                                                                                                                                                                                                                                                                                                                                                                                                                                                                                                                                                                                                                                                                                                                                                                                                                                                                                                                                                                                                                                                                                                                                                                                                                                                                                                                                                                                                                                                                                                                                                                                                                                                                                                                                                                                                                                                                                                                                                                                                                                                                                                                                                                                                                                                                                                                                                                                                                                                                                                                                                                                                                                                                                                                                                                                                                                                                                                                                                                                                                                                                                                                                                                                                                                                                                                                                                                                                                                                                                                                                                                                                                                                                                                                                                                                                                                                                                                                                                                                                                                                                                                                                                                                                                                                                                                                                                                                                                                                                                                                                                                                                                                                                                                                                                                                                                                                                                                                                                                                                                                                                                                                                                                                                                                                                                                                                                                                                                                                                                                                                                                                                                                                                                                                                                                                                                                                                                                                                                                                                                                                                                                                                                                                                                                                                                                                                                                                                                                                                                                                                                                                                                                                                                                                                                                                                                                                                                                                                                                                                                                                                                                                                                                                                                                                                                                                                                                                                                                                                                                                                                                                                                                                                                                                                                                                                                                                                                                                                                                                                                                                                                                                                                                                                                                                                                                                                                                                                                                                                                                                                                                                                                                                                                                                                                                                                                                                                                                                                                                                                                                                                                                                                                                                                                                                                                                                                                                                                                                                                                                                                                                                                                                                                                                                                                                                                                                                                                                                                                                                                                                                                                                                                                                                                                                                                                                                                                                                                                                                                                                                                                                                                                                                                                                                                                                                                                                                                                                                                                                                                                                                                                                                                                                                                                                                                                                                                                                                                                                                                                                                                                                                                                                                                                                                                                                                                                                                                                               | COMMUNITY TESTING CENTRE                                                         | Hong Kong Department of Health                                                     | Alan K.L. Tsang; Dominic N.C. Tsang; Edman T.K. Lam; Gannon C.K. Mak; Ken H.L. Ng; Peter C.W. Yip; Peter K.C. Cheng; Rickjason C.W. Chan                                                                                                                                                                                                                                                                                                                                 |
| EPI_ISL_2227272, EPI_ISL_2227273                                                                                                                                                                                                                                                                                                                                                                                                                                                                                                                                                                                                                                                                                                                                                                                                                                                                                                                                                                                                                                                                                                                                                                                                                                                                                                                                                                                                                                                                                                                                                                                                                                                                                                                                                                                                                                                                                                                                                                                                                                                                                                                                                                                                                                                                                                                                                                                                                                                                                                                                                                                                                                                                                                                                                                                                                                                                                                                                                                                                                                                                                                                                                                                                                                                                                                                                                                                                                                                                                                                                                                                                                                                                                                                                                                                                                                                                                                                                                                                                                                                                                                                                                                                                                                                                                                                                                                                                                                                                                                                                                                                                                                                                                                                                                                                                                                                                                                                                                                                                                                                                                                                                                                                                                                                                                                                                                                                                                                                                                                                                                                                                                                                                                                                                                                                                                                                                                                                                                                                                                                                                                                                                                                                                                                                                                                                                                                                                                                                                                                                                                                                                                                                                                                                                                                                                                                                                                                                                                                                                                                                                                                                                                                                                                                                                                                                                                                                                                                                                                                                                                                                                                                                                                                                                                                                                                                                                                                                                                                                                                                                                                                                                                                                                                                                                                                                                                                                                                                                                                                                                                                                                                                                                                                                                                                                                                                                                                                                                                                                                                                                                                                                                                                                                                                                                                                                                                                                                                                                                                                                                                                                                                                                                                                                                                                                                                                                                                                                                                                                                                                                                                                                                                                                                                                                                                                                                                                                                                                                                                                                                                                                                                                                                                                                                                                                                                                                                                                                                                                                                                                                                                                                                                                                                                                                                                                                                                                                                                                                                                                                                                                                                                                                                                                                                                                                                                                                                                                                                                                                                                                                                                                                                                                                                                                                                                                                                                                                                                                                                                                                                                                                                                                                                                                                                                                                                                                                                                                                                                                                                                                                                                                                                                                                                                                                                                                                                                                                                                                                                                                                                                                                                                                                                                                                                                                                                                                                                                                                                                                                                                                                                                                                                                                                                                                                                                                                                                                                                                                                                                                                                                                                                                                                                                                              | COVID-19 National Reference Laboratory, Pasteur Institute of Iran                | Genetics Research Center, University of Social Welfare and Rehabilitation Sciences | Hossein Najmabadi; Hossein Najmabadi; Kimia Karimi; Maha Tavakoli; Marzieh Moheini; Mohammad Hassan Pouriayevali; Mostafa Salehi-Vaziri; Zohreh Fattahi                                                                                                                                                                                                                                                                                                                  |
| EPI_ISL_1190762                                                                                                                                                                                                                                                                                                                                                                                                                                                                                                                                                                                                                                                                                                                                                                                                                                                                                                                                                                                                                                                                                                                                                                                                                                                                                                                                                                                                                                                                                                                                                                                                                                                                                                                                                                                                                                                                                                                                                                                                                                                                                                                                                                                                                                                                                                                                                                                                                                                                                                                                                                                                                                                                                                                                                                                                                                                                                                                                                                                                                                                                                                                                                                                                                                                                                                                                                                                                                                                                                                                                                                                                                                                                                                                                                                                                                                                                                                                                                                                                                                                                                                                                                                                                                                                                                                                                                                                                                                                                                                                                                                                                                                                                                                                                                                                                                                                                                                                                                                                                                                                                                                                                                                                                                                                                                                                                                                                                                                                                                                                                                                                                                                                                                                                                                                                                                                                                                                                                                                                                                                                                                                                                                                                                                                                                                                                                                                                                                                                                                                                                                                                                                                                                                                                                                                                                                                                                                                                                                                                                                                                                                                                                                                                                                                                                                                                                                                                                                                                                                                                                                                                                                                                                                                                                                                                                                                                                                                                                                                                                                                                                                                                                                                                                                                                                                                                                                                                                                                                                                                                                                                                                                                                                                                                                                                                                                                                                                                                                                                                                                                                                                                                                                                                                                                                                                                                                                                                                                                                                                                                                                                                                                                                                                                                                                                                                                                                                                                                                                                                                                                                                                                                                                                                                                                                                                                                                                                                                                                                                                                                                                                                                                                                                                                                                                                                                                                                                                                                                                                                                                                                                                                                                                                                                                                                                                                                                                                                                                                                                                                                                                                                                                                                                                                                                                                                                                                                                                                                                                                                                                                                                                                                                                                                                                                                                                                                                                                                                                                                                                                                                                                                                                                                                                                                                                                                                                                                                                                                                                                                                                                                                                                                                                                                                                                                                                                                                                                                                                                                                                                                                                                                                                                                                                                                                                                                                                                                                                                                                                                                                                                                                                                                                                                                                                                                                                                                                                                                                                                                                                                                                                                                                                                                                                                                               | CREMER(Centre de Recherches sur les Maladies Emergentes et Ré-émergentes)        | TransVIHM(Recherches Translacionnelles sur le VIH et les Maladies Infectieuses)    | Ahidjo Ayouba; Celestin Godwe; Christelle Butel; Dowbiss Meta Djoms; Eitel Mpoudi Ngole; Ezeu Delaporte; Essemu Livo; Laetitia Serrano; Marcel Tongo; Marie Amouguo; Martin Maidaidi Foudi; Martine Peeters; Nicole Vidal; Rodrigue Kamga                                                                                                                                                                                                                                |
| EPI_ISL_636980                                                                                                                                                                                                                                                                                                                                                                                                                                                                                                                                                                                                                                                                                                                                                                                                                                                                                                                                                                                                                                                                                                                                                                                                                                                                                                                                                                                                                                                                                                                                                                                                                                                                                                                                                                                                                                                                                                                                                                                                                                                                                                                                                                                                                                                                                                                                                                                                                                                                                                                                                                                                                                                                                                                                                                                                                                                                                                                                                                                                                                                                                                                                                                                                                                                                                                                                                                                                                                                                                                                                                                                                                                                                                                                                                                                                                                                                                                                                                                                                                                                                                                                                                                                                                                                                                                                                                                                                                                                                                                                                                                                                                                                                                                                                                                                                                                                                                                                                                                                                                                                                                                                                                                                                                                                                                                                                                                                                                                                                                                                                                                                                                                                                                                                                                                                                                                                                                                                                                                                                                                                                                                                                                                                                                                                                                                                                                                                                                                                                                                                                                                                                                                                                                                                                                                                                                                                                                                                                                                                                                                                                                                                                                                                                                                                                                                                                                                                                                                                                                                                                                                                                                                                                                                                                                                                                                                                                                                                                                                                                                                                                                                                                                                                                                                                                                                                                                                                                                                                                                                                                                                                                                                                                                                                                                                                                                                                                                                                                                                                                                                                                                                                                                                                                                                                                                                                                                                                                                                                                                                                                                                                                                                                                                                                                                                                                                                                                                                                                                                                                                                                                                                                                                                                                                                                                                                                                                                                                                                                                                                                                                                                                                                                                                                                                                                                                                                                                                                                                                                                                                                                                                                                                                                                                                                                                                                                                                                                                                                                                                                                                                                                                                                                                                                                                                                                                                                                                                                                                                                                                                                                                                                                                                                                                                                                                                                                                                                                                                                                                                                                                                                                                                                                                                                                                                                                                                                                                                                                                                                                                                                                                                                                                                                                                                                                                                                                                                                                                                                                                                                                                                                                                                                                                                                                                                                                                                                                                                                                                                                                                                                                                                                                                                                                                                                                                                                                                                                                                                                                                                                                                                                                                                                                                                                                                | CS Xai Xai                                                                       | KRISP, KZN Research Innovation and Sequencing Platform                             | Giandhari J; Ismael N; Nadia Siteo; Nedio Mabunda; Paulo Arnaldo; Pillay S; Tegally H; Wilkinson E; de Oliveira T                                                                                                                                                                                                                                                                                                                                                        |
| EPI_ISL_910079                                                                                                                                                                                                                                                                                                                                                                                                                                                                                                                                                                                                                                                                                                                                                                                                                                                                                                                                                                                                                                                                                                                                                                                                                                                                                                                                                                                                                                                                                                                                                                                                                                                                                                                                                                                                                                                                                                                                                                                                                                                                                                                                                                                                                                                                                                                                                                                                                                                                                                                                                                                                                                                                                                                                                                                                                                                                                                                                                                                                                                                                                                                                                                                                                                                                                                                                                                                                                                                                                                                                                                                                                                                                                                                                                                                                                                                                                                                                                                                                                                                                                                                                                                                                                                                                                                                                                                                                                                                                                                                                                                                                                                                                                                                                                                                                                                                                                                                                                                                                                                                                                                                                                                                                                                                                                                                                                                                                                                                                                                                                                                                                                                                                                                                                                                                                                                                                                                                                                                                                                                                                                                                                                                                                                                                                                                                                                                                                                                                                                                                                                                                                                                                                                                                                                                                                                                                                                                                                                                                                                                                                                                                                                                                                                                                                                                                                                                                                                                                                                                                                                                                                                                                                                                                                                                                                                                                                                                                                                                                                                                                                                                                                                                                                                                                                                                                                                                                                                                                                                                                                                                                                                                                                                                                                                                                                                                                                                                                                                                                                                                                                                                                                                                                                                                                                                                                                                                                                                                                                                                                                                                                                                                                                                                                                                                                                                                                                                                                                                                                                                                                                                                                                                                                                                                                                                                                                                                                                                                                                                                                                                                                                                                                                                                                                                                                                                                                                                                                                                                                                                                                                                                                                                                                                                                                                                                                                                                                                                                                                                                                                                                                                                                                                                                                                                                                                                                                                                                                                                                                                                                                                                                                                                                                                                                                                                                                                                                                                                                                                                                                                                                                                                                                                                                                                                                                                                                                                                                                                                                                                                                                                                                                                                                                                                                                                                                                                                                                                                                                                                                                                                                                                                                                                                                                                                                                                                                                                                                                                                                                                                                                                                                                                                                                                                                                                                                                                                                                                                                                                                                                                                                                                                                                                                                                                | CSIR-Centre for Cellular and Molecular Biology                                   | CSIR-Centre for Cellular and Molecular Biology                                     | Archana Bharadwaj Siva; B Himasri; Blessy B John; Divya Tej Sowpati; Karthik Bharadwaj Tallapaka; Lamuk Zaveri; Namami Gaur; Payel Mukherjee; Pratheusa Maccha; Priya Singh; Purushotham Vodnala; Rakesh K Mishra; Sofia Banu; Tulasi Nagabandi; Viswagithe S L                                                                                                                                                                                                          |
| EPI_ISL_1380396, EPI_ISL_1838393, EPI_ISL_1838400, EPI_ISL_1838452, EPI_ISL_1838522, EPI_ISL_2775002                                                                                                                                                                                                                                                                                                                                                                                                                                                                                                                                                                                                                                                                                                                                                                                                                                                                                                                                                                                                                                                                                                                                                                                                                                                                                                                                                                                                                                                                                                                                                                                                                                                                                                                                                                                                                                                                                                                                                                                                                                                                                                                                                                                                                                                                                                                                                                                                                                                                                                                                                                                                                                                                                                                                                                                                                                                                                                                                                                                                                                                                                                                                                                                                                                                                                                                                                                                                                                                                                                                                                                                                                                                                                                                                                                                                                                                                                                                                                                                                                                                                                                                                                                                                                                                                                                                                                                                                                                                                                                                                                                                                                                                                                                                                                                                                                                                                                                                                                                                                                                                                                                                                                                                                                                                                                                                                                                                                                                                                                                                                                                                                                                                                                                                                                                                                                                                                                                                                                                                                                                                                                                                                                                                                                                                                                                                                                                                                                                                                                                                                                                                                                                                                                                                                                                                                                                                                                                                                                                                                                                                                                                                                                                                                                                                                                                                                                                                                                                                                                                                                                                                                                                                                                                                                                                                                                                                                                                                                                                                                                                                                                                                                                                                                                                                                                                                                                                                                                                                                                                                                                                                                                                                                                                                                                                                                                                                                                                                                                                                                                                                                                                                                                                                                                                                                                                                                                                                                                                                                                                                                                                                                                                                                                                                                                                                                                                                                                                                                                                                                                                                                                                                                                                                                                                                                                                                                                                                                                                                                                                                                                                                                                                                                                                                                                                                                                                                                                                                                                                                                                                                                                                                                                                                                                                                                                                                                                                                                                                                                                                                                                                                                                                                                                                                                                                                                                                                                                                                                                                                                                                                                                                                                                                                                                                                                                                                                                                                                                                                                                                                                                                                                                                                                                                                                                                                                                                                                                                                                                                                                                                                                                                                                                                                                                                                                                                                                                                                                                                                                                                                                                                                                                                                                                                                                                                                                                                                                                                                                                                                                                                                                                                                                                                                                                                                                                                                                                                                                                                                                                                                                                                                                                                          | CSIR-Centre for Cellular and Molecular Biology                                   | CSIR-Centre for Cellular and Molecular Biology-INSACOG                             | Amareshwar Vodapalli; Ara Sreenivas; Archana Bharadwaj Siva; B Himasri; Blessy B John; Divya Tej Sowpati; Jandhyala Sai Krishna; Karthik Bharadwaj Tallapaka; Lamuk Zaveri; Namami Gaur; Onkar Kulkarni; Payel Mukherjee; Pratheusa Maccha; Priya Nurkuthy; Priya Singh; Purushotham Vodnala; Rakesh K Mishra; Sarath Chandra Thota; Shreekant Verma; Sofia Banu; Sumedha Avadhanula; Tulasi Nagabandi; Valli Nagalakshmi Undamatla; Vidhyadhari Methuku; Viswagithe S L |
| EPI_ISL_2754370                                                                                                                                                                                                                                                                                                                                                                                                                                                                                                                                                                                                                                                                                                                                                                                                                                                                                                                                                                                                                                                                                                                                                                                                                                                                                                                                                                                                                                                                                                                                                                                                                                                                                                                                                                                                                                                                                                                                                                                                                                                                                                                                                                                                                                                                                                                                                                                                                                                                                                                                                                                                                                                                                                                                                                                                                                                                                                                                                                                                                                                                                                                                                                                                                                                                                                                                                                                                                                                                                                                                                                                                                                                                                                                                                                                                                                                                                                                                                                                                                                                                                                                                                                                                                                                                                                                                                                                                                                                                                                                                                                                                                                                                                                                                                                                                                                                                                                                                                                                                                                                                                                                                                                                                                                                                                                                                                                                                                                                                                                                                                                                                                                                                                                                                                                                                                                                                                                                                                                                                                                                                                                                                                                                                                                                                                                                                                                                                                                                                                                                                                                                                                                                                                                                                                                                                                                                                                                                                                                                                                                                                                                                                                                                                                                                                                                                                                                                                                                                                                                                                                                                                                                                                                                                                                                                                                                                                                                                                                                                                                                                                                                                                                                                                                                                                                                                                                                                                                                                                                                                                                                                                                                                                                                                                                                                                                                                                                                                                                                                                                                                                                                                                                                                                                                                                                                                                                                                                                                                                                                                                                                                                                                                                                                                                                                                                                                                                                                                                                                                                                                                                                                                                                                                                                                                                                                                                                                                                                                                                                                                                                                                                                                                                                                                                                                                                                                                                                                                                                                                                                                                                                                                                                                                                                                                                                                                                                                                                                                                                                                                                                                                                                                                                                                                                                                                                                                                                                                                                                                                                                                                                                                                                                                                                                                                                                                                                                                                                                                                                                                                                                                                                                                                                                                                                                                                                                                                                                                                                                                                                                                                                                                                                                                                                                                                                                                                                                                                                                                                                                                                                                                                                                                                                                                                                                                                                                                                                                                                                                                                                                                                                                                                                                                                                                                                                                                                                                                                                                                                                                                                                                                                                                                                                                                                               | CURE                                                                             | Institut Pasteur de Montevideo                                                     | Andres Lizasoain; Belén González; Cecilia Alonso; Daiana Mir; Emiliano Pereira; Gonzalo Bello; Ighor Arantes; Juan Zanetti; Lucia Bilbao; Luciana Griffero; Lucia Spangenberg; Mailen Arleo; Mariana Brandes; María José Benítez-Galeano; Matias Castells; Matias Salvo; Matias Victoria; Mauricio Méndez; Melissa Duquia; Natalia Rego; Natalia Reyes; Odhille Chappos; Pablo Smircich; Pia Techera; Rodney Colina; Tamara Fernández-Calero; Tania Poser; Verónica Noya |
| EPI_ISL_935791                                                                                                                                                                                                                                                                                                                                                                                                                                                                                                                                                                                                                                                                                                                                                                                                                                                                                                                                                                                                                                                                                                                                                                                                                                                                                                                                                                                                                                                                                                                                                                                                                                                                                                                                                                                                                                                                                                                                                                                                                                                                                                                                                                                                                                                                                                                                                                                                                                                                                                                                                                                                                                                                                                                                                                                                                                                                                                                                                                                                                                                                                                                                                                                                                                                                                                                                                                                                                                                                                                                                                                                                                                                                                                                                                                                                                                                                                                                                                                                                                                                                                                                                                                                                                                                                                                                                                                                                                                                                                                                                                                                                                                                                                                                                                                                                                                                                                                                                                                                                                                                                                                                                                                                                                                                                                                                                                                                                                                                                                                                                                                                                                                                                                                                                                                                                                                                                                                                                                                                                                                                                                                                                                                                                                                                                                                                                                                                                                                                                                                                                                                                                                                                                                                                                                                                                                                                                                                                                                                                                                                                                                                                                                                                                                                                                                                                                                                                                                                                                                                                                                                                                                                                                                                                                                                                                                                                                                                                                                                                                                                                                                                                                                                                                                                                                                                                                                                                                                                                                                                                                                                                                                                                                                                                                                                                                                                                                                                                                                                                                                                                                                                                                                                                                                                                                                                                                                                                                                                                                                                                                                                                                                                                                                                                                                                                                                                                                                                                                                                                                                                                                                                                                                                                                                                                                                                                                                                                                                                                                                                                                                                                                                                                                                                                                                                                                                                                                                                                                                                                                                                                                                                                                                                                                                                                                                                                                                                                                                                                                                                                                                                                                                                                                                                                                                                                                                                                                                                                                                                                                                                                                                                                                                                                                                                                                                                                                                                                                                                                                                                                                                                                                                                                                                                                                                                                                                                                                                                                                                                                                                                                                                                                                                                                                                                                                                                                                                                                                                                                                                                                                                                                                                                                                                                                                                                                                                                                                                                                                                                                                                                                                                                                                                                                                                                                                                                                                                                                                                                                                                                                                                                                                                                                                                                                                | Cadham Provincial laboratory                                                     | National Microbiology Laboratory (NML)                                             | Anna Majer; Anneliese Landgraf; CanCOGEM's metadata curation team; Darian Hole; David Alexander; Elsie Grudskii; Gary Van Domselaar; Grace Seo; Jared Bullard; Jennifer Tanner; Jerry Kust; Kirsten Biggar; Madison Chapel; Morag Graham; Natalie Knox; Nathalie Bastien; Paul Van Caesele; Philip Mabon; Public Health Agency of Canada CanCOGen team; Riannon Houzeurich; Russell Hamrick; Shari Tyson; Timothy Booth; Yan Li                                          |
| EPI_ISL_413557                                                                                                                                                                                                                                                                                                                                                                                                                                                                                                                                                                                                                                                                                                                                                                                                                                                                                                                                                                                                                                                                                                                                                                                                                                                                                                                                                                                                                                                                                                                                                                                                                                                                                                                                                                                                                                                                                                                                                                                                                                                                                                                                                                                                                                                                                                                                                                                                                                                                                                                                                                                                                                                                                                                                                                                                                                                                                                                                                                                                                                                                                                                                                                                                                                                                                                                                                                                                                                                                                                                                                                                                                                                                                                                                                                                                                                                                                                                                                                                                                                                                                                                                                                                                                                                                                                                                                                                                                                                                                                                                                                                                                                                                                                                                                                                                                                                                                                                                                                                                                                                                                                                                                                                                                                                                                                                                                                                                                                                                                                                                                                                                                                                                                                                                                                                                                                                                                                                                                                                                                                                                                                                                                                                                                                                                                                                                                                                                                                                                                                                                                                                                                                                                                                                                                                                                                                                                                                                                                                                                                                                                                                                                                                                                                                                                                                                                                                                                                                                                                                                                                                                                                                                                                                                                                                                                                                                                                                                                                                                                                                                                                                                                                                                                                                                                                                                                                                                                                                                                                                                                                                                                                                                                                                                                                                                                                                                                                                                                                                                                                                                                                                                                                                                                                                                                                                                                                                                                                                                                                                                                                                                                                                                                                                                                                                                                                                                                                                                                                                                                                                                                                                                                                                                                                                                                                                                                                                                                                                                                                                                                                                                                                                                                                                                                                                                                                                                                                                                                                                                                                                                                                                                                                                                                                                                                                                                                                                                                                                                                                                                                                                                                                                                                                                                                                                                                                                                                                                                                                                                                                                                                                                                                                                                                                                                                                                                                                                                                                                                                                                                                                                                                                                                                                                                                                                                                                                                                                                                                                                                                                                                                                                                                                                                                                                                                                                                                                                                                                                                                                                                                                                                                                                                                                                                                                                                                                                                                                                                                                                                                                                                                                                                                                                                                                                                                                                                                                                                                                                                                                                                                                                                                                                                                                                                                | California Department of Public Health                                           | Chiu Laboratory, University of California, San Francisco                           | Chao-Yang Pan; Debra A. Wadford; Hugo Guevara; Scot Federman; Wei Gu; Xianding Deng; and Charles Y. Chiu                                                                                                                                                                                                                                                                                                                                                                 |
| EPI_ISL_1817730                                                                                                                                                                                                                                                                                                                                                                                                                                                                                                                                                                                                                                                                                                                                                                                                                                                                                                                                                                                                                                                                                                                                                                                                                                                                                                                                                                                                                                                                                                                                                                                                                                                                                                                                                                                                                                                                                                                                                                                                                                                                                                                                                                                                                                                                                                                                                                                                                                                                                                                                                                                                                                                                                                                                                                                                                                                                                                                                                                                                                                                                                                                                                                                                                                                                                                                                                                                                                                                                                                                                                                                                                                                                                                                                                                                                                                                                                                                                                                                                                                                                                                                                                                                                                                                                                                                                                                                                                                                                                                                                                                                                                                                                                                                                                                                                                                                                                                                                                                                                                                                                                                                                                                                                                                                                                                                                                                                                                                                                                                                                                                                                                                                                                                                                                                                                                                                                                                                                                                                                                                                                                                                                                                                                                                                                                                                                                                                                                                                                                                                                                                                                                                                                                                                                                                                                                                                                                                                                                                                                                                                                                                                                                                                                                                                                                                                                                                                                                                                                                                                                                                                                                                                                                                                                                                                                                                                                                                                                                                                                                                                                                                                                                                                                                                                                                                                                                                                                                                                                                                                                                                                                                                                                                                                                                                                                                                                                                                                                                                                                                                                                                                                                                                                                                                                                                                                                                                                                                                                                                                                                                                                                                                                                                                                                                                                                                                                                                                                                                                                                                                                                                                                                                                                                                                                                                                                                                                                                                                                                                                                                                                                                                                                                                                                                                                                                                                                                                                                                                                                                                                                                                                                                                                                                                                                                                                                                                                                                                                                                                                                                                                                                                                                                                                                                                                                                                                                                                                                                                                                                                                                                                                                                                                                                                                                                                                                                                                                                                                                                                                                                                                                                                                                                                                                                                                                                                                                                                                                                                                                                                                                                                                                                                                                                                                                                                                                                                                                                                                                                                                                                                                                                                                                                                                                                                                                                                                                                                                                                                                                                                                                                                                                                                                                                                                                                                                                                                                                                                                                                                                                                                                                                                                                                                                                               | Calvinia RSC Clinic                                                              | NHLS/UCT                                                                           | Arash Iranzadeh; Bruna Galvaio; Carolyn Williamson; Deelan Doolabh; Diana Hardie; Innocent Mudau; Kruger Marais; Lynn Tyers; Marvin Hsiao; Stephen Korsman                                                                                                                                                                                                                                                                                                               |
| EPI_ISL_2547359, EPI_ISL_2547361                                                                                                                                                                                                                                                                                                                                                                                                                                                                                                                                                                                                                                                                                                                                                                                                                                                                                                                                                                                                                                                                                                                                                                                                                                                                                                                                                                                                                                                                                                                                                                                                                                                                                                                                                                                                                                                                                                                                                                                                                                                                                                                                                                                                                                                                                                                                                                                                                                                                                                                                                                                                                                                                                                                                                                                                                                                                                                                                                                                                                                                                                                                                                                                                                                                                                                                                                                                                                                                                                                                                                                                                                                                                                                                                                                                                                                                                                                                                                                                                                                                                                                                                                                                                                                                                                                                                                                                                                                                                                                                                                                                                                                                                                                                                                                                                                                                                                                                                                                                                                                                                                                                                                                                                                                                                                                                                                                                                                                                                                                                                                                                                                                                                                                                                                                                                                                                                                                                                                                                                                                                                                                                                                                                                                                                                                                                                                                                                                                                                                                                                                                                                                                                                                                                                                                                                                                                                                                                                                                                                                                                                                                                                                                                                                                                                                                                                                                                                                                                                                                                                                                                                                                                                                                                                                                                                                                                                                                                                                                                                                                                                                                                                                                                                                                                                                                                                                                                                                                                                                                                                                                                                                                                                                                                                                                                                                                                                                                                                                                                                                                                                                                                                                                                                                                                                                                                                                                                                                                                                                                                                                                                                                                                                                                                                                                                                                                                                                                                                                                                                                                                                                                                                                                                                                                                                                                                                                                                                                                                                                                                                                                                                                                                                                                                                                                                                                                                                                                                                                                                                                                                                                                                                                                                                                                                                                                                                                                                                                                                                                                                                                                                                                                                                                                                                                                                                                                                                                                                                                                                                                                                                                                                                                                                                                                                                                                                                                                                                                                                                                                                                                                                                                                                                                                                                                                                                                                                                                                                                                                                                                                                                                                                                                                                                                                                                                                                                                                                                                                                                                                                                                                                                                                                                                                                                                                                                                                                                                                                                                                                                                                                                                                                                                                                                                                                                                                                                                                                                                                                                                                                                                                                                                                                                                                              | Calvinia RSC Clinic                                                              | National Health Laboratory Service/University of Cape Town (NHLS/UCT)              | Arash Iranzadeh; Bruna Galvaio; Carolyn Williamson; Deelan Doolabh; Diana Hardie; Gert Marais; Innocent Mudau; Lynn Tyers; Marvin Hsiao; Stephen Korsman                                                                                                                                                                                                                                                                                                                 |
| EPI_ISL_1096139, EPI_ISL_1096140                                                                                                                                                                                                                                                                                                                                                                                                                                                                                                                                                                                                                                                                                                                                                                                                                                                                                                                                                                                                                                                                                                                                                                                                                                                                                                                                                                                                                                                                                                                                                                                                                                                                                                                                                                                                                                                                                                                                                                                                                                                                                                                                                                                                                                                                                                                                                                                                                                                                                                                                                                                                                                                                                                                                                                                                                                                                                                                                                                                                                                                                                                                                                                                                                                                                                                                                                                                                                                                                                                                                                                                                                                                                                                                                                                                                                                                                                                                                                                                                                                                                                                                                                                                                                                                                                                                                                                                                                                                                                                                                                                                                                                                                                                                                                                                                                                                                                                                                                                                                                                                                                                                                                                                                                                                                                                                                                                                                                                                                                                                                                                                                                                                                                                                                                                                                                                                                                                                                                                                                                                                                                                                                                                                                                                                                                                                                                                                                                                                                                                                                                                                                                                                                                                                                                                                                                                                                                                                                                                                                                                                                                                                                                                                                                                                                                                                                                                                                                                                                                                                                                                                                                                                                                                                                                                                                                                                                                                                                                                                                                                                                                                                                                                                                                                                                                                                                                                                                                                                                                                                                                                                                                                                                                                                                                                                                                                                                                                                                                                                                                                                                                                                                                                                                                                                                                                                                                                                                                                                                                                                                                                                                                                                                                                                                                                                                                                                                                                                                                                                                                                                                                                                                                                                                                                                                                                                                                                                                                                                                                                                                                                                                                                                                                                                                                                                                                                                                                                                                                                                                                                                                                                                                                                                                                                                                                                                                                                                                                                                                                                                                                                                                                                                                                                                                                                                                                                                                                                                                                                                                                                                                                                                                                                                                                                                                                                                                                                                                                                                                                                                                                                                                                                                                                                                                                                                                                                                                                                                                                                                                                                                                                                                                                                                                                                                                                                                                                                                                                                                                                                                                                                                                                                                                                                                                                                                                                                                                                                                                                                                                                                                                                                                                                                                                                                                                                                                                                                                                                                                                                                                                                                                                                                                                                                              | Cambodian National Public Health Laboratory, National Institute of Public Health | Virology Unit, Institut Pasteur du Cambodge                                        | Chau Daraphech; Chin Savuth; Erik A Karlsson; Kraing Sidon; Ly Sovann; Sokhoun Yann; Veasna Duong; Yi Sengdoeur                                                                                                                                                                                                                                                                                                                                                          |
| EPI_ISL_576371, EPI_ISL_576372, EPI_ISL_576373, EPI_ISL_857315, EPI_ISL_857316, EPI_ISL_857317, EPI_ISL_857318, EPI_ISL_857319, EPI_ISL_857320, EPI_ISL_857321, EPI_ISL_857322, EPI_ISL_857323, EPI_ISL_857324, EPI_ISL_857325, EPI_ISL_857326, EPI_ISL_857327, EPI_ISL_857328, EPI_ISL_857329, EPI_ISL_857330, EPI_ISL_857331, EPI_ISL_857332, EPI_ISL_857333, EPI_ISL_857334, EPI_ISL_857335, EPI_ISL_857336, EPI_ISL_857337, EPI_ISL_857338, EPI_ISL_857339, EPI_ISL_857340, EPI_ISL_857341, EPI_ISL_857342, EPI_ISL_857343, EPI_ISL_857344, EPI_ISL_857345, EPI_ISL_857346, EPI_ISL_857347, EPI_ISL_857348, EPI_ISL_857349, EPI_ISL_857350, EPI_ISL_857351, EPI_ISL_857352, EPI_ISL_857353, EPI_ISL_857354, EPI_ISL_857355, EPI_ISL_857356, EPI_ISL_857357, EPI_ISL_857358, EPI_ISL_857359, EPI_ISL_857360, EPI_ISL_857361, EPI_ISL_857362, EPI_ISL_857363, EPI_ISL_857364, EPI_ISL_857365, EPI_ISL_857366, EPI_ISL_857367, EPI_ISL_857368, EPI_ISL_857369, EPI_ISL_857370, EPI_ISL_857371, EPI_ISL_857372, EPI_ISL_857373, EPI_ISL_857374, EPI_ISL_857375, EPI_ISL_857376, EPI_ISL_857377, EPI_ISL_857378, EPI_ISL_857379, EPI_ISL_857380, EPI_ISL_857381, EPI_ISL_857382, EPI_ISL_857383, EPI_ISL_857384, EPI_ISL_857385, EPI_ISL_857386, EPI_ISL_857387, EPI_ISL_857388, EPI_ISL_857389, EPI_ISL_857390, EPI_ISL_857391, EPI_ISL_857392, EPI_ISL_857393, EPI_ISL_857394, EPI_ISL_857395, EPI_ISL_857396, EPI_ISL_857397, EPI_ISL_857398, EPI_ISL_857399, EPI_ISL_857400, EPI_ISL_857401, EPI_ISL_857402, EPI_ISL_857403, EPI_ISL_857404, EPI_ISL_857405, EPI_ISL_857406, EPI_ISL_857407, EPI_ISL_857408, EPI_ISL_857409, EPI_ISL_857410, EPI_ISL_857411, EPI_ISL_857412, EPI_ISL_857413, EPI_ISL_857414, EPI_ISL_857415, EPI_ISL_857416, EPI_ISL_857417, EPI_ISL_857418, EPI_ISL_857419, EPI_ISL_857420, EPI_ISL_857421, EPI_ISL_857422, EPI_ISL_857423, EPI_ISL_857424, EPI_ISL_857425, EPI_ISL_857426, EPI_ISL_857427, EPI_ISL_857428, EPI_ISL_857429, EPI_ISL_857430, EPI_ISL_857431, EPI_ISL_857432, EPI_ISL_857433, EPI_ISL_857434, EPI_ISL_857435, EPI_ISL_857436, EPI_ISL_857437, EPI_ISL_857438, EPI_ISL_857439, EPI_ISL_857440, EPI_ISL_857441, EPI_ISL_857442, EPI_ISL_857443, EPI_ISL_857444, EPI_ISL_857445, EPI_ISL_857446, EPI_ISL_857447, EPI_ISL_857448, EPI_ISL_857449, EPI_ISL_857450, EPI_ISL_857451, EPI_ISL_857452, EPI_ISL_857453, EPI_ISL_857454, EPI_ISL_857455, EPI_ISL_857456, EPI_ISL_857457, EPI_ISL_857458, EPI_ISL_857459, EPI_ISL_857460, EPI_ISL_857461, EPI_ISL_857462, EPI_ISL_857463, EPI_ISL_857464, EPI_ISL_857465, EPI_ISL_857466, EPI_ISL_857467, EPI_ISL_857468, EPI_ISL_857469, EPI_ISL_857470, EPI_ISL_857471, EPI_ISL_857472, EPI_ISL_857473, EPI_ISL_857474, EPI_ISL_857475, EPI_ISL_857476, EPI_ISL_857477, EPI_ISL_857478, EPI_ISL_857479, EPI_ISL_857480, EPI_ISL_857481, EPI_ISL_857482, EPI_ISL_857483, EPI_ISL_857484, EPI_ISL_857485, EPI_ISL_857486, EPI_ISL_857487, EPI_ISL_857488, EPI_ISL_857489, EPI_ISL_857490, EPI_ISL_857491, EPI_ISL_857492, EPI_ISL_857493, EPI_ISL_857494, EPI_ISL_857495, EPI_ISL_857496, EPI_ISL_857497, EPI_ISL_857498, EPI_ISL_857499, EPI_ISL_857500, EPI_ISL_857501, EPI_ISL_857502, EPI_ISL_857503, EPI_ISL_857504, EPI_ISL_857505, EPI_ISL_857506, EPI_ISL_857507, EPI_ISL_857508, EPI_ISL_857509, EPI_ISL_857510, EPI_ISL_857511, EPI_ISL_857512, EPI_ISL_857513, EPI_ISL_857514, EPI_ISL_857515, EPI_ISL_857516, EPI_ISL_857517, EPI_ISL_857518, EPI_ISL_857519, EPI_ISL_857520, EPI_ISL_857521, EPI_ISL_857522, EPI_ISL_857523, EPI_ISL_857524, EPI_ISL_857525, EPI_ISL_857526, EPI_ISL_857527, EPI_ISL_857528, EPI_ISL_857529, EPI_ISL_857530, EPI_ISL_857531, EPI_ISL_857532, EPI_ISL_857533, EPI_ISL_857534, EPI_ISL_857535, EPI_ISL_857536, EPI_ISL_857537, EPI_ISL_857538, EPI_ISL_857539, EPI_ISL_857540, EPI_ISL_857541, EPI_ISL_857542, EPI_ISL_857543, EPI_ISL_857544, EPI_ISL_857545, EPI_ISL_857546, EPI_ISL_857547, EPI_ISL_857548, EPI_ISL_857549, EPI_ISL_857550, EPI_ISL_857551, EPI_ISL_857552, EPI_ISL_857553, EPI_ISL_857554, EPI_ISL_857555, EPI_ISL_857556, EPI_ISL_857557, EPI_ISL_857558, EPI_ISL_857559, EPI_ISL_857560, EPI_ISL_857561, EPI_ISL_857562, EPI_ISL_857563, EPI_ISL_857564, EPI_ISL_857565, EPI_ISL_857566, EPI_ISL_857567, EPI_ISL_857568, EPI_ISL_857569, EPI_ISL_857570, EPI_ISL_857571, EPI_ISL_857572, EPI_ISL_857573, EPI_ISL_857574, EPI_ISL_857575, EPI_ISL_857576, EPI_ISL_857577, EPI_ISL_857578, EPI_ISL_857579, EPI_ISL_857580, EPI_ISL_857581, EPI_ISL_857582, EPI_ISL_857583, EPI_ISL_857584, EPI_ISL_857585, EPI_ISL_857586, EPI_ISL_857587, EPI_ISL_857588, EPI_ISL_857589, EPI_ISL_857590, EPI_ISL_857591, EPI_ISL_857592, EPI_ISL_857593, EPI_ISL_857594, EPI_ISL_857595, EPI_ISL_857596, EPI_ISL_857597, EPI_ISL_857598, EPI_ISL_857599, EPI_ISL_857600, EPI_ISL_857601, EPI_ISL_857602, EPI_ISL_857603, EPI_ISL_857604, EPI_ISL_857605, EPI_ISL_857606, EPI_ISL_857607, EPI_ISL_857608, EPI_ISL_857609, EPI_ISL_857610, EPI_ISL_857611, EPI_ISL_857612, EPI_ISL_857613, EPI_ISL_857614, EPI_ISL_857615, EPI_ISL_857616, EPI_ISL_857617, EPI_ISL_857618, EPI_ISL_857619, EPI_ISL_857620, EPI_ISL_857621, EPI_ISL_857622, EPI_ISL_857623, EPI_ISL_857624, EPI_ISL_857625, EPI_ISL_857626, EPI_ISL_857627, EPI_ISL_857628, EPI_ISL_857629, EPI_ISL_857630, EPI_ISL_857631, EPI_ISL_857632, EPI_ISL_857633, EPI_ISL_857634, EPI_ISL_857635, EPI_ISL_857636, EPI_ISL_857637, EPI_ISL_857638, EPI_ISL_857639, EPI_ISL_857640, EPI_ISL_857641, EPI_ISL_857642, EPI_ISL_857643, EPI_ISL_857644, EPI_ISL_857645, EPI_ISL_857646, EPI_ISL_857647, EPI_ISL_857648, EPI_ISL_857649, EPI_ISL_857650, EPI_ISL_857651, EPI_ISL_857652, EPI_ISL_857653, EPI_ISL_857654, EPI_ISL_857655, EPI_ISL_857656, EPI_ISL_857657, EPI_ISL_857658, EPI_ISL_857659, EPI_ISL_857660, EPI_ISL_857661, EPI_ISL_857662, EPI_ISL_857663, EPI_ISL_857664, EPI_ISL_857665, EPI_ISL_857666, EPI_ISL_857667, EPI_ISL_857668, EPI_ISL_857669, EPI_ISL_857670, EPI_ISL_857671, EPI_ISL_857672, EPI_ISL_857673, EPI_ISL_857674, EPI_ISL_857675, EPI_ISL_857676, EPI_ISL_857677, EPI_ISL_857678, EPI_ISL_857679, EPI_ISL_857680, EPI_ISL_857681, EPI_ISL_857682, EPI_ISL_857683, EPI_ISL_857684, EPI_ISL_857685, EPI_ISL_857686, EPI_ISL_857687, EPI_ISL_857688, EPI_ISL_857689, EPI_ISL_857690, EPI_ISL_857691, EPI_ISL_857692, EPI_ISL_857693, EPI_ISL_857694, EPI_ISL_857695, EPI_ISL_857696, EPI_ISL_857697, EPI_ISL_857698, EPI_ISL_857699, EPI_ISL_857700, EPI_ISL_857701, EPI_ISL_857702, EPI_ISL_857703, EPI_ISL_857704, EPI_ISL_857705, EPI_ISL_857706, EPI_ISL_857707, EPI_ISL_857708, EPI_ISL_857709, EPI_ISL_857710, EPI_ISL_857711, EPI_ISL_857712, EPI_ISL_857713, EPI_ISL_857714, EPI_ISL_857715, EPI_ISL_857716, EPI_ISL_857717, EPI_ISL_857718, EPI_ISL_857719, EPI_ISL_857720, EPI_ISL_857721, EPI_ISL_857722, EPI_ISL_857723, EPI_ISL_857724, EPI_ISL_857725, EPI_ISL_857726, EPI_ISL_857727, EPI_ISL_857728, EPI_ISL_857729, EPI_ISL_857730, EPI_ISL_857731, EPI_ISL_857732, EPI_ISL_857733, EPI_ISL_857734, EPI_ISL_857735, EPI_ISL_857736, EPI_ISL_857737, EPI_ISL_857738, EPI_ISL_857739, EPI_ISL_857740, EPI_ISL_857741, EPI_ISL_857742, EPI_ISL_857743, EPI_ISL_857744, EPI_ISL_857745, EPI_ISL_857746, EPI_ISL_857747, EPI_ISL_857748, EPI_ISL_857749, EPI_ISL_857750, EPI_ISL_857751, EPI_ISL_857752, EPI_ISL_857753, EPI_ISL_857754, EPI_ISL_857755, EPI_ISL_857756, EPI_ISL_857757, EPI_ISL_857758, EPI_ISL_857759, EPI_ISL_857760, EPI_ISL_857761, EPI_ISL_857762, EPI_ISL_857763, EPI_ISL_857764, EPI_ISL_857765, EPI_ISL_857766, EPI_ISL_857767, EPI_ISL_857768, EPI_ISL_857769, EPI_ISL_857770, EPI_ISL_857771, EPI_ISL_857772, EPI_ISL_857773, EPI_ISL_857774, EPI_ISL_857775, EPI_ISL_857776, EPI_ISL_857777, EPI_ISL_857778, EPI_ISL_857779, EPI_ISL_857780, EPI_ISL_857781, EPI_ISL_857782, EPI_ISL_857783, EPI_ISL_857784, EPI_ISL_857785, EPI_ISL_857786, EPI_ISL_857787, EPI_ISL_857788, EPI_ISL_857789, EPI_ISL_857790, EPI_ISL_857791, EPI_ISL_857792, EPI_ISL_857793, EPI_ISL_857794, EPI_ISL_857795, EPI_ISL_857796, EPI_ISL_857797, EPI_ISL_857798, EPI_ISL_857799, EPI_ISL_857800, EPI_ISL_857801, EPI_ISL_857802, EPI_ISL_857803, EPI_ISL_857804, EPI_ISL_857805, EPI_ISL_857806, EPI_ISL_857807, EPI_ISL_857808, EPI_ISL_857809, EPI_ISL_857810, EPI_ISL_857811, EPI_ISL_857812, EPI_ISL_857813, EPI_ISL_857814, EPI_ISL_857815, EPI_ISL_857816, EPI_ISL_857817, EPI_ISL_857818, EPI_ISL_857819, EPI_ISL_857820, EPI_ISL_857821, EPI_ISL_857822, EPI_ISL_857823, EPI_ISL_857824, EPI_ISL_857825, EPI_ISL_857826, EPI_ISL_857827, EPI_ISL_857828, EPI_ISL_857829, EPI_ISL_857830, EPI_ISL_857831, EPI_ISL_857832, EPI_ISL_857833, EPI_ISL_857834, EPI_ISL_857835, EPI_ISL_857836, EPI_ISL_857837, EPI_ISL_857838, EPI_ISL_857839, EPI_ISL_857840, EPI_ISL_857841, EPI_ISL_857842, EPI_ISL_857843, EPI_ISL_857844, EPI_ISL_857845, EPI_ISL_857846, EPI_ISL_857847, EPI_ISL_857848, EPI_ISL_857849, EPI_ISL_857850, EPI_ISL_857851, EPI_ISL_857852, EPI_ISL_857853, EPI_ISL_857854, EPI_ISL_857855, EPI_ISL_857856, EPI_ISL_857857, EPI_ISL_857858, EPI_ISL_857859, EPI_ISL_857860, EPI_ISL_857861, EPI_ISL_857862, EPI_ISL_857863, EPI_ISL_857864, EPI_ISL_857865, EPI_ISL_857866, EPI_ISL_857867, EPI_ISL_857868, EPI_ISL_857869, EPI_ISL_857870, EPI_ISL_857871, EPI_ISL_857872, EPI_ISL_857873, EPI_ISL_857874, EPI_ISL_857875, EPI_ISL_857876, EPI_ISL_857877, EPI_ISL_857878, EPI_ISL_857879, EPI_ISL_857880, EPI_ISL_857881, EPI_ISL_857882, EPI_ISL_857883, EPI_ISL_857884, EPI_ISL_857885, EPI_ISL_857886, EPI_ISL_857887, EPI_ISL_857888, EPI_ISL_857889, EPI_ISL_857890, EPI_ISL_857891, EPI_ISL_857892, EPI_ISL_857893, EPI_ISL_857894, EPI_ISL_857895, EPI_ISL_857896, EPI_ISL_857897, EPI_ISL_857898, EPI_ISL_857899, EPI_ISL_857900, EPI_ISL_857901, EPI_ISL_857902, EPI_ISL_857903, EPI_ISL_857904, EPI_ISL_857905, EPI_ISL_857906, EPI_ISL_857907, EPI_ISL_857908, EPI_ISL_857909, EPI_ISL_857910, EPI_ISL_857911, EPI_ISL_857912, EPI_ISL_857913, EPI_ISL_857914, EPI_ISL_857915, EPI_ISL_857916, EPI_ISL_857917, EPI_ISL_857918, EPI_ISL_857919, EPI_ISL_857920, EPI_ISL_857921, EPI_ISL_857922, EPI_ISL_857923, EPI_ISL_857924, EPI_ISL_857925, EPI_ISL_857926, EPI_ISL_857927, EPI_ISL_857928, EPI_ISL_857929, EPI_ISL_857930, EPI_ISL_857931, EPI_ISL_857932, EPI_ISL_857933, EPI_ISL_857934, EPI_ISL_857935, EPI_ISL_857936, EPI_ISL_857937, EPI_ISL_857938, EPI_ISL_857939, EPI_ISL_857940, EPI_ISL_857941, EPI_ISL_857942, EPI_ISL_857943, EPI_ISL_857944, EPI_ISL_857945, EPI_ISL_857946, EPI_ISL_857947, EPI_ISL_857948, EPI_ISL_857949, EPI_ISL_857950, EPI_ISL_857951, EPI_ISL_857952, EPI_ISL_857953, EPI_ISL_857954, EPI_ISL_857955, EPI_ISL_857956, EPI_ISL_857957, EPI_ISL_857958, EPI_ISL_857959, EPI_ISL_857960, EPI_ISL_857961, EPI_ISL_857962, EPI_ISL_857963, EPI_ISL_857964, EPI_ISL_857965, EPI_ISL_857966, EPI_ISL_857967, EPI_ISL_857968, EPI_ISL_857969, EPI_ISL_857970, EPI_ISL_857971, EPI_ISL_857972, EPI_ISL_857973, EPI_ISL_857974, EPI_ISL_857975, EPI_ISL_857976, EPI_ISL_857977, EPI_ISL_857978, EPI_ISL_857979, EPI_ISL_857980, EPI_ISL_857981, EPI_ISL_857982, EPI_ISL_857983, EPI_ISL_857984, EPI_ISL_857985, EPI_ISL_857986, EPI_ISL_857987, EPI_ISL_857988, EPI_ISL_857989, EPI_ISL_857990, EPI_ISL_857991, EPI_ISL_857992, EPI_ISL_857993, EPI_ISL_857994, EPI_ISL_857995, EPI_ISL_857996, EPI_ISL_857997, EPI_ISL_857998, EPI_ISL_857999, EPI_ISL_858000, EPI_ISL_858001, EPI_ISL_858002, EPI_ISL_858003, EPI_ISL_858004, EPI_ISL_858005, EPI_ISL_858006, EPI_ISL_858007, EPI_ISL_858008, EPI_ISL_858009, EPI_ISL_858010, EPI_ISL_858011, EPI_ISL_858012, EPI_ISL_858013, EPI_ISL_858014, EPI_ISL_858015, EPI_ISL_858016, EPI_ISL_858017, EPI_ISL_858018, EPI_ISL_858019, EPI_ISL_858020, EPI_ISL_858021, EPI_ISL_858022, EPI_ISL_858023, EPI_ISL_858024, EPI_ISL_858025, EPI_ISL_858026, EPI_ISL_858027, EPI_ISL_858028, EPI_ISL_858029, EPI_ISL_858030, EPI_ISL_858031, EPI_ISL_858032, EPI_ISL_858033, EPI_ISL_858034, EPI_ISL_858035, EPI_ISL_858036, EPI_ISL_858037, EPI_ISL_858038, EPI_ISL_858039, EPI_ISL_858040, EPI_ISL_858041, EPI_ISL_858042, EPI_ISL_858043, EPI_ISL_858044, EPI_ISL_858045, EPI_ISL_858046, EPI_ISL_858047, EPI_ISL_858048, EPI_ISL_858049, EPI_ISL_858050, EPI_ISL_858051, EPI_ISL_858052, EPI_ISL_858053, EPI_ISL_858054, EPI_ISL_858055, EPI_ISL_858056, EPI_ISL_858057, EPI_ISL_858058, EPI_ISL_858059, EPI_ISL_858060, EPI_ISL_858061, EPI_ISL_858062, EPI_ISL_858063, EPI_ISL_858064, EPI_ISL_858065, EPI_ISL_858066, EPI_ISL_858067, EPI_ISL_858068, EPI_ISL_858069, EPI_ISL_858070, EPI_ISL_858071, EPI_ISL_858072, EPI_ISL_858073, EPI_ISL_858074, EPI_ISL_858075, EPI_ISL_858076, EPI_ISL_858077, EPI_ISL_858078, EPI_ISL_858079, EPI_ISL_858080, EPI_ISL_858081, EPI_ISL_858082, EPI_ISL_858083, EPI_ISL_858084, EPI_ISL_858085, EPI_ISL_858086, EPI_ISL_858087, EPI_ISL_858088, EPI_ISL_858089, EPI_ISL_858090, EPI_ISL_858091, EPI_ISL_858092, EPI_ISL_858093, EPI_ISL_858094, EPI_ISL_858095, EPI_ISL_858096, EPI_ISL_858097, EPI_ISL_858098, EPI_ISL_858099, EPI_ISL_858100, EPI_ISL_858101, EPI_ISL_858102, EPI_ISL_858103, EPI_ISL_858104, EPI_ISL_858105, EPI_ISL_858106, EPI_ISL_858107, EPI_ISL_858108, EPI_ISL_858109, EPI_ISL_858110, EPI_ISL_858111, EPI_ISL_858112, EPI_ISL_858113, EPI_ISL_858114, EPI_ISL_858115, EPI_ISL_858116, EPI_ISL_858117, EPI_ISL_858118, EPI_ISL_858119, EPI_ISL_858120, EPI_ISL_858121, EPI_ISL_858122, EPI_ISL_858123, EPI_ISL_858124, EPI_ISL_858125, EPI_ISL_858126, EPI_ISL_858127, EPI_ISL_858128, EPI_ISL_858129, EPI_ISL_858130, EPI_ISL_858131, EPI_ISL_858132, EPI_ISL_858133, EPI_ISL_858134, EPI_ISL_858135, EPI_ISL_858136, EPI_ISL_858137, EPI_ISL_858138, EPI_ISL_858139, EPI_ISL_858140, EPI_ISL_858141, EPI_ISL_858142, EPI_ISL_858143, EPI_ISL_858144, EPI_ISL_858145, EPI_ISL_858146, EPI_ISL_858147, EPI_ISL_858148, EPI_ISL_858149, EPI_ISL_858150, EPI_ISL_858151, EPI_ISL_858152, EPI_ISL_858153, EPI_ISL_858154, EPI_ISL_858155, EPI_ISL_858156, EPI_ISL_858157, EPI_ISL_858158, EPI_ISL_858159, EPI_ISL_858160, EPI_ISL_858161, EPI_ISL_858162, EPI_ISL_858163, EPI_ISL_858164, EPI_ISL_858165, EPI_ISL_858166, EPI_ISL_858167, EPI_ISL_858168, EPI_ISL_858169, EPI_ISL_858170, EPI_ISL_858171, EPI_ISL_858172, EPI_ISL_858173, EPI_ISL_858174, EPI_ISL_858175, EPI_ISL_858176, EPI_ISL_858177, EPI_ISL_858178, EPI_ISL_858179, EPI_ISL_858180, EPI_ISL_858181, EPI_ISL_858182, EPI_ISL_858183, EPI_ISL_858184, EPI_ISL_858185, EPI_ISL_858186, EPI_ISL_858187, EPI_ISL_858188, EPI_ISL_858189, EPI_ISL_858190, EPI_ISL_858191, EPI_ISL_858192, EPI_ISL_858193, EPI_ISL_858194, EPI_ISL_858195, EPI_ISL_85819 |                                                                                  |                                                                                    |                                                                                                                                                                                                                                                                                                                                                                                                                                                                          |

|                                                                                                                                                                                                                                                                                                                                                                                                                                                                                                                                                                                                  |                                                                                                                                                                                                                     |                                                                                                                                                                                 |                                                                                                                                                                                                                                                                                                                                                                                                                                                                                                                          |
|--------------------------------------------------------------------------------------------------------------------------------------------------------------------------------------------------------------------------------------------------------------------------------------------------------------------------------------------------------------------------------------------------------------------------------------------------------------------------------------------------------------------------------------------------------------------------------------------------|---------------------------------------------------------------------------------------------------------------------------------------------------------------------------------------------------------------------|---------------------------------------------------------------------------------------------------------------------------------------------------------------------------------|--------------------------------------------------------------------------------------------------------------------------------------------------------------------------------------------------------------------------------------------------------------------------------------------------------------------------------------------------------------------------------------------------------------------------------------------------------------------------------------------------------------------------|
| EPI_ISL_794593, EPI_ISL_794594, EPI_ISL_794595, EPI_ISL_794596, EPI_ISL_794597, EPI_ISL_794598, EPI_ISL_794599, EPI_ISL_794600, EPI_ISL_794601, EPI_ISL_794602, EPI_ISL_794603, EPI_ISL_794604, EPI_ISL_794605, EPI_ISL_794606, EPI_ISL_2313057, EPI_ISL_2313058, EPI_ISL_2313059, EPI_ISL_2313060, EPI_ISL_2313061, EPI_ISL_2313062, EPI_ISL_2313063, EPI_ISL_2313064, EPI_ISL_2313065, EPI_ISL_2313066, EPI_ISL_2313067, EPI_ISL_2313068, EPI_ISL_2313069                                                                                                                                      | Central Laboratories, Egyptian Ministry of Health and Population                                                                                                                                                    | Central Laboratories, Egyptian Ministry of Health and Population                                                                                                                | A.E.; Ali; El Guindy; El Sayes; El Taweel, A.; El-Shesheny; El-Shesheny, R.; Gomaa, M.; Hassany, M.; Kamei; Kandeil, A.; Kayali, G.; Kayed; Khalifa; Kutkat, O.; M.A.; M.K.; M.N.; Mahmoud; Mahrous, N.; Moatasim, Y.; Mostafa, A.; N.M.; Naguib, A.; R.E.; Roshdy; S.H.; Saleh, M.; Shawky, S.; Shehata, M.; W.H.                                                                                                                                                                                                       |
| EPI_ISL_2502381, EPI_ISL_2502387, EPI_ISL_2502393, EPI_ISL_2502402, EPI_ISL_2502426, EPI_ISL_2502427, EPI_ISL_2502430, EPI_ISL_2502435, EPI_ISL_2502438, EPI_ISL_2502441                                                                                                                                                                                                                                                                                                                                                                                                                         | Central Laboratory, Bureau of Public Health (BOG) and Academic Hospital Paramaribo                                                                                                                                  | Esramus Medical Center                                                                                                                                                          | Bas B Oude Munnink; Cherise Beek; Consuela Partowidjojjo; Dion Gajadin; Ed Pf IJzerman; Emmanuelle Munger; Gary Gummels; Ingrid SK Krishnadath; Lycke Woittiez; Marion PG Koopmans; Mireille Van de Veer; Phyllis Pinas; Princes Wongsowidjojjo; Radjesh Ori; Ranisha Doerbaalie; Rohma Banwari; Soeradj Harkisoen; Stephen Vreden; Tilotmadebie Ramlal; Verne Nanhoë                                                                                                                                                    |
| EPI_ISL_1822763, EPI_ISL_1822784                                                                                                                                                                                                                                                                                                                                                                                                                                                                                                                                                                 | Central Medical Laboratory                                                                                                                                                                                          | Texas Children's Microbiome Center                                                                                                                                              | Adrianna Maliga; Francis Morey; Gerhaldine Morazan; Jennifer K. Spinler; Kristy O. Murray; Melissa Diaz-Musa; Miguel Saldana; Russell I Manzanero; Ruth Ann Luna; Sarah M. Gunter; Shannon E. Ronca                                                                                                                                                                                                                                                                                                                      |
| EPI_ISL_529032                                                                                                                                                                                                                                                                                                                                                                                                                                                                                                                                                                                   | Central Molecular Microbiology Laboratory and Next Generation Sequencing Reference Laboratory, Clinical and Chemical Pathology Department, Faculty of Medicine, CAIRO UNIVERSITY                                    | Next Generation Sequencing Reference Laboratory, Faculty of Medicine, CAIRO UNIVERSITY and The Center for Genome and Microbiome Research, Faculty of Pharmacy, CAIRO UNIVERSITY | May Abdelfattah; May Sherif Soliman; Ramy Karam Aziz                                                                                                                                                                                                                                                                                                                                                                                                                                                                     |
| EPI_ISL_529031                                                                                                                                                                                                                                                                                                                                                                                                                                                                                                                                                                                   | Central Molecular Microbiology Laboratory, Clinical and Chemical Pathology Department, Faculty of Medicine, CAIRO UNIVERSITY                                                                                        | Next Generation Sequencing Reference Laboratory, Faculty of Medicine, Cairo University and The Center for Genome and Microbiome Research, Faculty of Pharmacy, CAIRO UNIVERSITY | May Abdelfattah; May Sherif Soliman; Ramy Karam Aziz                                                                                                                                                                                                                                                                                                                                                                                                                                                                     |
| EPI_ISL_2464001                                                                                                                                                                                                                                                                                                                                                                                                                                                                                                                                                                                  | Central Public Health Lab, National Public Health Organization                                                                                                                                                      | Central Public Health Lab, National Public Health Organization                                                                                                                  | Gregory Spanakos et al; Kyriaki Tryfinopoulou                                                                                                                                                                                                                                                                                                                                                                                                                                                                            |
| EPI_ISL_794605, EPI_ISL_794606, EPI_ISL_794607, EPI_ISL_794608                                                                                                                                                                                                                                                                                                                                                                                                                                                                                                                                   | Central Public Health Laboratories, Egyptian Ministry of Health and Population                                                                                                                                      | Central Public Health Laboratories, Egyptian Ministry of Health and Population                                                                                                  | A.E.; Ali; El Guindy; El Sayes; El Taweel, A.; El-Shesheny, R.; Gomaa, M.; Kamei; Kandeil, A.; Kayali, G.; Kayed; Khalifa; Kutkat, O.; M.A.; M.K.; M.N.; Mahmoud; Mahrous, N.; Moatasim, Y.; Mostafa, A.; N.M.; Naguib, A.; Roshdy; S.H.; Saleh, M.; Shawky, S.; Shehata, M.; W.H.                                                                                                                                                                                                                                       |
| EPI_ISL_693471, EPI_ISL_693473, EPI_ISL_693474, EPI_ISL_693477, EPI_ISL_693478, EPI_ISL_693481, EPI_ISL_693482, EPI_ISL_693483, EPI_ISL_1307643, EPI_ISL_1307660, EPI_ISL_1322329, EPI_ISL_1322330                                                                                                                                                                                                                                                                                                                                                                                               | Central Public Health Laboratory                                                                                                                                                                                    | National Public Health Laboratory, National Centre for Infectious Diseases                                                                                                      | Esorom Daoni; Lin Cui; Raymond Tzer Pin Lin; Sophie Octavia; Theresa Palou; Tze Minn Mak; Zhenyang Zhou                                                                                                                                                                                                                                                                                                                                                                                                                  |
| EPI_ISL_978512                                                                                                                                                                                                                                                                                                                                                                                                                                                                                                                                                                                   | Central Public Health Laboratory - LACEN -Bahia, Salvador, Brazil                                                                                                                                                   | Central Public Health Laboratory - LACEN -Bahia, Salvador, Brazil                                                                                                               | Arabela Leal; Breno Dominguez; Felicidade Pereira; Jaqueline Gomes; Luciana Oliveira; Luiz Alcantara; Marcela Gómez; Marta Giovanetti; Patricia Cajado; Stephane Tosta; Vagner Fonseca; Vanessa Nardy                                                                                                                                                                                                                                                                                                                    |
| EPI_ISL_3045139, EPI_ISL_3045144, EPI_ISL_3045167, EPI_ISL_3045179, EPI_ISL_3045180, EPI_ISL_3045220                                                                                                                                                                                                                                                                                                                                                                                                                                                                                             | Central Public Health Laboratory, National Public Health Organization                                                                                                                                               | Central Public Health Laboratory, National Public Health Organization                                                                                                           | A.Katsoulidou et al; G.Spanakos; Kyriaki Tryfinopoulou                                                                                                                                                                                                                                                                                                                                                                                                                                                                   |
| EPI_ISL_2232157                                                                                                                                                                                                                                                                                                                                                                                                                                                                                                                                                                                  | Central Public Health Laboratory, National Public Health Organization                                                                                                                                               | Greek Genome Center, Biomedical Research Foundation of the Academy of Athens (BRFAA)                                                                                            | Dimitrios Thanos; Emmanouil Athanasiadis; Giannis Vatsellas; Katerina Zoi; Kyriaki Tryfinopoulou; Theodoros Loupis                                                                                                                                                                                                                                                                                                                                                                                                       |
| EPI_ISL_2786923                                                                                                                                                                                                                                                                                                                                                                                                                                                                                                                                                                                  | Central Virology Laboratory, Ministry of Health                                                                                                                                                                     | Central Virology Laboratory, Ministry of Health                                                                                                                                 | Amos Adler; Efrat Bucris; Ella Mendelson; Michal Mandelboim; Moran Shwartzort-Cohen; Neta S. Zuckerman; Noam Protter; Oran Erster; Orna Mor; Saar Brustein                                                                                                                                                                                                                                                                                                                                                               |
| EPI_ISL_2141877                                                                                                                                                                                                                                                                                                                                                                                                                                                                                                                                                                                  | Centrāla Laboratorija                                                                                                                                                                                               | Latvian Biomedical Research and Study Centre                                                                                                                                    | Daivids Fridmanis; Elina Dimina; Guntars Zarins; Ivars Silamikelis; Jana Osite; Janis Klovinis; Janis Pjalkovskis; Juris Perevoscikovs; Kaspars Megnis; Laila Silamikele; Lauma Freimane; Laura Ansonē; Liga Birzniece; Marta Priedite; Monta Ustinova; Nikita Zrelovs; Uga Dumpis; Una Krumina; Vita Rovite                                                                                                                                                                                                             |
| EPI_ISL_961838, EPI_ISL_1312520                                                                                                                                                                                                                                                                                                                                                                                                                                                                                                                                                                  | Centrāla laboratorija                                                                                                                                                                                               | Latvian Biomedical Research and Study Centre                                                                                                                                    | Daivids Fridmanis; Daivids Fridmanis; Guntars Zarins; Ivars Silamikelis; Ivars Silamikelis; Jana Osite; Janis Klovinis; Janis Pjalkovskis; Juris Perevoscikovs; Kaspars Megnis; Kaspars Megnis; Laila Silamikele; Laila Silamikele; Lauma Freimane; Lauma Freimane; Laura Ansonē; Laura Ansonē; Liga Birzniece; Liga Birzniece; Marta Priedite; Monta Ustinova; Nikita Zrelovs; Nikita Zrelovs; Uga Dumpis; Una Krumina; Vita Rovite; Vita Rovite                                                                        |
| EPI_ISL_1357603                                                                                                                                                                                                                                                                                                                                                                                                                                                                                                                                                                                  | Centre For Biotechnology Research And Development                                                                                                                                                                   | THE AFRICA GENOMICS CENTRE AND CONSULTANCY                                                                                                                                      | Adedei Hawi; Cecilia Waruhii; Damaris Matoke-Muhia; George Michuki; John Njuguna; Lilian Kanjau; Ravena Mubichi                                                                                                                                                                                                                                                                                                                                                                                                          |
| EPI_ISL_414625                                                                                                                                                                                                                                                                                                                                                                                                                                                                                                                                                                                   | Centre Hospitalier Régional Universitaire de Nantes Laboratoire de Virologie                                                                                                                                        | National Reference Center for Viruses of Respiratory Infections, Institut Pasteur, Paris                                                                                        | Angela Brisebarre; Flora Donati Vincent Enouf; Marianne Coste-Burel; Marion Barbet; Maud Vanpeene; Méline Bizard; Mielinie Albert; Sylvie Behillili; Sylvie van der Werf                                                                                                                                                                                                                                                                                                                                                 |
| EPI_ISL_1001044, EPI_ISL_1001045, EPI_ISL_1001050, EPI_ISL_1001051, EPI_ISL_1001053, EPI_ISL_1001059, EPI_ISL_1001062, EPI_ISL_1001064, EPI_ISL_1001068, EPI_ISL_1790120, EPI_ISL_1790131                                                                                                                                                                                                                                                                                                                                                                                                        | Centre Pasteur du Cameroun                                                                                                                                                                                          | Institut Pasteur de Dakar                                                                                                                                                       | Carniel Elisabeth; Dia Ndongo; Diagne Moussa Moïse; Diallo Amadou; Diop Mamadou; Faye Ousmane; Loucoubar Cheikh; Ndiaye Ndack; Njoum Richard; Sall Amadou Alpha; Sankhe Safietou                                                                                                                                                                                                                                                                                                                                         |
| EPI_ISL_788936, EPI_ISL_788938                                                                                                                                                                                                                                                                                                                                                                                                                                                                                                                                                                   | Centre de Recherche et de Formation en Infectiologie Guinée                                                                                                                                                         | TransVHMI, IRD/INSERM/Monpellier University                                                                                                                                     | Abdoul Karim SOUMAH; Abdoulaye TOURE; Ahidjo AYOUBA; Aïlimou CAMARA; Alpha Kabinet KEITA; Bouna Yatassaye; Christelle BUTEL; Eric DELAPORTE; Jean-louis MONEMOU; Joel KOIVOGUI; Kaba KOUROUMA; Laetitia SERRANO; Mamadou Bhoïye KEITA; Mamadou Saliou BAH; Mamadou Saliou SOW; Mandiou DIKATE; Martine PEETERS; Moriba POVOGUI; Penda Malhado DIALLO; Sakoba KEITA                                                                                                                                                       |
| EPI_ISL_1615655, EPI_ISL_1913075, EPI_ISL_1913078, EPI_ISL_1913080, EPI_ISL_2097218, EPI_ISL_2097219, EPI_ISL_2097220, EPI_ISL_2097221, EPI_ISL_2097223, EPI_ISL_2097228, EPI_ISL_2097229, EPI_ISL_2097230, EPI_ISL_2097231, EPI_ISL_2156795, EPI_ISL_2156822, EPI_ISL_2424136, EPI_ISL_2424137, EPI_ISL_2424157, EPI_ISL_2424158, EPI_ISL_2424159, EPI_ISL_2424160, EPI_ISL_2424161, EPI_ISL_2424162, EPI_ISL_2424163, EPI_ISL_2434970, EPI_ISL_2434971, EPI_ISL_2434974, EPI_ISL_2434975, EPI_ISL_2434979, EPI_ISL_2442276, EPI_ISL_2442277, EPI_ISL_2442338, EPI_ISL_2442363, EPI_ISL_2442384 | Centre de Recherches Médicales de Lambaréné (CERMEI)                                                                                                                                                                | Centre de Recherches Médicales de Lambaréné (CERMEI)                                                                                                                            | Anicet Mouïty Matoumba; Armel MINTSA NDONG; Bertrand Lell and Ayola Akim Adegnika; Bénédicte NDEBOKO; Georgelin NGUEMA ONDO; Georgelin Nguema Ondo; Gédéon Prince Manouana; Jean Bernard LEKANA-DOUKI; Jean Bernard Lekana-Douki; Joël-Fleury DJOBA SIWAYAYA; Joël-Fleury Djoba Siwayaya; Michel Ngonga Dikongo; Moustapha Nzamba Maloum; Rodrigue BIKANGUI; Rodrigue Bikangui; Sam O'neilla Oye Bingono; Samira ZOA ASSOUMOU; Samira Zoa Assoumou; Srinivas reddy Palleria; Steffen Borrmann; Thirumalaisamy P. Velavan |
| EPI_ISL_978545, EPI_ISL_978548, EPI_ISL_2968046, EPI_ISL_2968064, EPI_ISL_2968065, EPI_ISL_2968069                                                                                                                                                                                                                                                                                                                                                                                                                                                                                               | Centre de Virologie des Maladies infectueuses Tropicales                                                                                                                                                            | Functional Genomic Platform UATRS-biology, CNRST                                                                                                                                | ; Abdelilah LARAQUI; Abderrazzak Rfaki; Ahmed REGGAD; Charifa DRISSI TOUZANI; Elmoutafa BENAÏSSA; Elmoutafa EL FAHIME; Farida HILALI; Hicham EL ANNAZ; Idriss-Amine LAHLOU; Ikram BNOUYAHIA; Khalid ENNIBI; Marouane MELLOUL; Mly Abdelaziz ELALAOUI; Mostafa ELOUENASS; Nadia EL MRIMAR; Nadia TOUIL; Nadia Touil; Rachid ABI; Rida TAGAJDID; Safae ELKOCHE; Sanaa ALAOUI-Amine; Tahar BAJJOU; Yassine SEKHSOKH; Youssef AKHOUD; Zohour KASMY                                                                           |
| EPI_ISL_471456                                                                                                                                                                                                                                                                                                                                                                                                                                                                                                                                                                                   | Centre de Virologie des Maladies Tropicales                                                                                                                                                                         | Functional Genomic Platform/Service Analyses Biologique/UATRS/ Centre National Pour la Recherche Scientifique Et Technique (CNRST)                                              | Abdelillah LARAQUI; Abdelkader LAATIRIS; Ahmed REGGAD; Elmoutafa EL FAHIME; Farida HILALI; Hicham EL ANNAZ; Idriss-Amine LAHLOU; Khalid ENNIBI; Marouane MELLOUL; Mly Abdelaziz ELALAOUI; Mostafa ELOUENASS; Nadia TOUIL; Rachid ABI; Rida TAGAJDID; Safae ELKOCHE; Sanaa ALAOUI-Amine; Tahar BAJJOU; Yassine SEKHSOKH; Youssef AKHOUD; Zohour KASMY                                                                                                                                                                     |
| EPI_ISL_792550, EPI_ISL_1233067, EPI_ISL_1717082, EPI_ISL_1717092, EPI_ISL_1717093, EPI_ISL_1970356, EPI_ISL_1970358, EPI_ISL_1970371, EPI_ISL_1970374, EPI_ISL_1970399, EPI_ISL_1970410, EPI_ISL_1970413, EPI_ISL_2481412, EPI_ISL_2481418, EPI_ISL_2481425, EPI_ISL_2803170, EPI_ISL_2803176, EPI_ISL_2803179, EPI_ISL_2803193, EPI_ISL_2803199, EPI_ISL_2803251, EPI_ISL_2803298                                                                                                                                                                                                              | Centre for Dengue Research and AICBU, Department of Immunology and Molecular Medicine                                                                                                                               | Centre for Dengue Research and AICBU, Department of Immunology and Molecular Medicine                                                                                           | Chandima Jeewandara; Deshan Madhusanka; Deshni Jayathilaka; Dinuka Ariyaratne; Diyanath Ranasinghe; Gathsaurie Neelika Malavige; Laksiri Gomes; Tibutius Thanesh Pramanayagam                                                                                                                                                                                                                                                                                                                                            |
| EPI_ISL_668448, EPI_ISL_668449, EPI_ISL_668452, EPI_ISL_668455                                                                                                                                                                                                                                                                                                                                                                                                                                                                                                                                   | Centre for Dengue Research, Department of Immunology and Molecular Medicine                                                                                                                                         | Centre for Dengue Research, Department of Immunology and Molecular Medicine                                                                                                     | Chandima Jeewandara; Deshni Jayathilaka; Dinuka Ariyaratne; Diyanath Ranasinghe; Gathsaurie Neelika Malavige; Laksiri Gomes                                                                                                                                                                                                                                                                                                                                                                                              |
| EPI_ISL_602565                                                                                                                                                                                                                                                                                                                                                                                                                                                                                                                                                                                   | Centre for Dengue Research, Department of Immunology and Molecular Medicine                                                                                                                                         | Centre for Dengue Research, Department of Immunology and Molecular Medicine                                                                                                     | Chandima Jeewandara; Deshni Jayathilaka; Dinuka Ariyaratne; Dinuka Guruge; Diyanath Ranasinghe; Gathsaurie Neelika Malavige; Laksiri Gomes; Ruwan Wijayayamuni                                                                                                                                                                                                                                                                                                                                                           |
| EPI_ISL_679977, EPI_ISL_763605, EPI_ISL_841936                                                                                                                                                                                                                                                                                                                                                                                                                                                                                                                                                   | Centre for Enzyme Innovation, University of Portsmouth / Translational Research Laboratory, Portsmouth Hospitals NHS Trust                                                                                          | COVID-19 Genomics UK (COG-UK) Consortium                                                                                                                                        | Allyson Lloyd; Angela Beckett; Anoop Chauhan; Ethan Butcher; Garry Scarlett; Kelly Bicknell; Robert Impey; Samuel Robson; Sarah Wylie; Scott Elliott; Sharon Glayshe; Yann Bourgeois                                                                                                                                                                                                                                                                                                                                     |
| EPI_ISL_654794                                                                                                                                                                                                                                                                                                                                                                                                                                                                                                                                                                                   | Centre for Human Virology & Genomics, Nigerian Institute of Medical Research                                                                                                                                        | Centre for Human Virology & Genomics, Nigerian Institute of Medical Research                                                                                                    | Shaibu, J.                                                                                                                                                                                                                                                                                                                                                                                                                                                                                                               |
| EPI_ISL_2399460, EPI_ISL_2399462, EPI_ISL_2502019                                                                                                                                                                                                                                                                                                                                                                                                                                                                                                                                                | Centre for Human Virology and Genomics, Microbiology Department, Nigerian Institute of Medical Research                                                                                                             | Central Research Laboratory, Nigerian Institute of Medical Research                                                                                                             | Ayorinde Babatunde James; Azuka Patrick Okwuraiwe; Babatunde Lawal Salako; Bamidele Iwalokun; Chika Kingsley Onwuamah; Grace Oni; Joseph Ojonugwa Shaibu; Josiah Ayoola Isong; Joy Ayoola; Muinah Adenike Fowora; Ngozi Mirabel Otunoye; Nyam Itse Yusuf; Olufemi Samuel Amoo; Phasha-Muchemenye Mmatshupo; Rahaman A. Ahmed; Rosemary Ajuma Adu; Sharon Abimbola; Sola Ajobaye; Uyi Emkopa; Yusuf Jimoh                                                                                                                 |
| EPI_ISL_413550                                                                                                                                                                                                                                                                                                                                                                                                                                                                                                                                                                                   | Centre for Human and Zoonotic Virology (CHAZVY), College of Medicine University of Lagos/Lagos University Teaching Hospital (LUTH), part of the Laboratory Network of the Nigeria Centre for Disease Control (NCDC) | African Centre of Excellence for Genomics of Infectious Diseases (ACEGID), Redeemer's University, Ede, Osun State, Nigeria                                                      | Ajogbasile F.V.; Folarin O.A.; Ihekweazu C. Happi C.T.; Kayode A.; Oguzie J.; Oluniyi P.E.                                                                                                                                                                                                                                                                                                                                                                                                                               |
| EPI_ISL_407893, EPI_ISL_413594                                                                                                                                                                                                                                                                                                                                                                                                                                                                                                                                                                   | Centre for Infectious Diseases and Microbiology Laboratory Services                                                                                                                                                 | NSW Health Pathology - Institute of Clinical Pathology and Medical Research; Westmead Hospital; University of Sydney                                                            | ; A; Alicia; Carter I; Chen S; Eden J-S; Gall; Gray K; Holmes EC; Kok J and Dwyer DE for the 2019-nCoV Study Group; Kok J and Dwyer DE for the 2019-nCoV Study Group*; Lam C; M; Maddocks S; O'Sullivan MW; Rahman H; Rockett R; Sintchenko V; Timms; V                                                                                                                                                                                                                                                                  |
| EPI_ISL_2842788                                                                                                                                                                                                                                                                                                                                                                                                                                                                                                                                                                                  | Centro Medico ABC                                                                                                                                                                                                   | Instituto Nacional de Medicina Genomica                                                                                                                                         | Cedro-Tanda A; Cesar Lara; Daniel Aguirre; Escobar-Arrazola; Gonzalez-Barrera D; Herrera-Montalvo LA.; Hidalgo-Miranda A; Jacomine Reyes-Carrasco; M; Mendoza-Vargas A; Munguia-Garza P; Ramirez-Vega O; Rangel-DeLeon D; Reyes-Grajeda JP; Roxana Trejo-González                                                                                                                                                                                                                                                        |
| EPI_ISL_837557, EPI_ISL_837559, EPI_ISL_837564, EPI_ISL_837565, EPI_ISL_837569, EPI_ISL_837572, EPI_ISL_837573, EPI_ISL_837577, EPI_ISL_837578                                                                                                                                                                                                                                                                                                                                                                                                                                                   | Centro Nacional de Enfermedades Tropicales (CENETROP)                                                                                                                                                               | Laboratory of Respiratory Viruses and Measles, Oswaldo Cruz Institute, FIOCRUZ                                                                                                  | Ana Carolina Mendonca; Anna Carolina Paixao; Cinthia Avila; Fernando Motta; Luciana Apolinario; Marilda Siqueira on behalf of the Fiocruz COVID-19 Genomic Surveillance Network; Paola Resende; Roxana Loayza                                                                                                                                                                                                                                                                                                            |
| EPI_ISL_2274031, EPI_ISL_2274037, EPI_ISL_2274038                                                                                                                                                                                                                                                                                                                                                                                                                                                                                                                                                | Centro Nacional de Enfermedades Tropicales (CENETROP)                                                                                                                                                               | Laboratory of Respiratory Viruses and Measles, Oswaldo Cruz Institute, FIOCRUZ                                                                                                  | Alice Sampaio Rocha; Ana Carolina Mendonca; Anna Carolina Paixao; Cinthia Avila; Elisa Cavalcante Pereira; Fernando Motta; Luciana Apolinario; Marilda Siqueira on behalf of the Fiocruz COVID-19 Genomic Surveillance Network; Paola Resende; Renata Serrano Lopes; Roxana Loayza; Taina Venas                                                                                                                                                                                                                          |

|                                                                                                                                                       |                                                                                                                                                    |                                                                                                                                                                                                                                                         |                                                                                                                                                                                                                                                                                                                                                                                                                                                                                                                                                                                           |
|-------------------------------------------------------------------------------------------------------------------------------------------------------|----------------------------------------------------------------------------------------------------------------------------------------------------|---------------------------------------------------------------------------------------------------------------------------------------------------------------------------------------------------------------------------------------------------------|-------------------------------------------------------------------------------------------------------------------------------------------------------------------------------------------------------------------------------------------------------------------------------------------------------------------------------------------------------------------------------------------------------------------------------------------------------------------------------------------------------------------------------------------------------------------------------------------|
| EPI_ISL_1531863, EPI_ISL_2231524, EPI_ISL_635531                                                                                                      | Centro de Diagnostico COVID-19 UABC Tijuana                                                                                                        | Andersen lab at Scripps Research                                                                                                                                                                                                                        | German Ibarra; Jonathan Vincent Baena; Jorge Luis Jimenez Niebla; Manuel Sanchez Alavez; Oscar Efrén Zazueta Fierro; SEARCH Alliance San Diego with Idanya Rubí Serafin Higuera                                                                                                                                                                                                                                                                                                                                                                                                           |
| EPI_ISL_2339876, EPI_ISL_2339903, EPI_ISL_2339907                                                                                                     | Centro de Diagnóstico COVID-19 UABC Tijuana                                                                                                        | Andersen lab at Scripps Research                                                                                                                                                                                                                        | German Ibarra; Jonathan Vincent Baena; Jorge Luis Jiménez Niebla; Manuel Sánchez Alavez; Oscar Efrén Zazueta Fierro; SEARCH Alliance San Diego with Idanya Rubí Serafin Higuera                                                                                                                                                                                                                                                                                                                                                                                                           |
| EPI_ISL_2031726                                                                                                                                       | Centro de Estudio de Enfermedades Autoinmunes (CREA), Universidad del Rosario, Bogotá, Colombia                                                    | Centro de Investigaciones en Microbiología y Biotecnología-UR (CIMBIUR), Facultad de Ciencias Naturales, Universidad del Rosario, Bogotá, Colombia                                                                                                      | Carolina Ramírez-Santana; Bernardo Salguero; Juan David Ramírez; Juan Esteban Gallo; Juan-Manuel Anaya; Luz H. Patiño; Marina Muñoz; Natalia Reyes; Odhille Chappos; Paula Perbolianachis; Pilar Moreno; Rodney Spangenberg; Ma Noel Bentancor; Ma Pia Techera; Mailen Arleo; Martina Alonso; María José Benitez; Matias Maidana; Mauricio Méndez; Melissa Duquía; Mercedes Paz; Natalia Rego; Natalia Ballesteros; Sergio Castañeda                                                                                                                                                      |
| EPI_ISL_941116, EPI_ISL_941123, EPI_ISL_941139                                                                                                        | Centro de Innovación en Vigilancia Epidemiológica (CIVE), Institut Pasteur Montevideo, Uruguay                                                     | Centro de Innovación en Vigilancia Epidemiológica (CIVE), Institut Pasteur Montevideo, Uruguay                                                                                                                                                          | Alicia Costáble; Alvaro Fajardo; Andrés Lizosán; Bernardo González; Bernardina Rivera; Cecilia Alonso; Cecilia Salazar; Gonzalo Moratorio; Gregorio Iraola; Henry Albornoz; Ignacio Ferrés; Inés Bellini; Juan Zanetti; Julio Medina; Lucia Bilbao; Luciana Griffero; Lucía Spangenberg; Ma Noel Bentancor; Ma Pia Techera; Mailen Arleo; Martina Alonso; María José Benitez; Matias Maidana; Mauricio Méndez; Melissa Duquía; Mercedes Paz; Natalia Rego; Natalia Reyes; Odhille Chappos; Paula Perbolianachis; Pilar Moreno; Rodney Colina; Rodrigo Arce; Tamara Fernández; Tania Possi |
| EPI_ISL_941982                                                                                                                                        | Centro de Investigaciones en Microbiología y Biotecnología-UR (CIMBIUR), Facultad de Ciencias Naturales, Universidad del Rosario, Bogotá, Colombia | Centro de Investigaciones en Microbiología y Biotecnología-UR (CIMBIUR), Facultad de Ciencias Naturales, Universidad del Rosario, Bogotá, Colombia Instituto Nacional de Salud, Bogotá, Colombia Icahn School of Medicine at Mount Sinai, New York, USA | Adriana van de Guchte; Alberto Paniz-Mondolfi; Alejandro Feged-Rivadeneira; Ana S. Gonzalez-Reiche; Andrés Angel; Carolina Flórez; Carolina Hernández; Emilia Mia Sordillo; Felipe González-Casabianca; Hala Alejei Alshammary; Harm van Bakel; Iván Carroll; Jaime Cascante; Jayeeta Dutta; Juan David Ramírez; Luz Helena Patiño; Marina Muñoz; Matthew M. Hernandez; Mauricio Santos-Vega; Mónica Palma-Cuero; Nathalia Ballesteros; Sergio Gomez; Viviana Simon; Zenab Khan                                                                                                           |
| EPI_ISL_491941                                                                                                                                        | Centro de Investigaciones, Universidad de Especialidades Espíritu Santo                                                                            | Centro de Investigaciones en Microbiología y Biotecnología-UR (CIMBIUR), Facultad de Ciencias Naturales, Universidad del Rosario, Bogotá, Colombia Instituto Nacional de Salud, Bogotá, Colombia Icahn School of Medicine at Mount Sinai, New York, USA | Adriana van de Guchte; Alberto Paniz-Mondolfi; Ana S. Gonzalez-Reiche; Carolina Flórez; Carolina Hernández; Emilia Mia Sordillo; Hala Alejei Alshammary; Harm van Bakel; Jayeeta Dutta; Juan David Ramírez; Luz Helena Patiño; Marina Muñoz; Matthew M. Hernandez; Nathalia Ballesteros; Sergio Gomez; Viviana Simon; Zenab Khan                                                                                                                                                                                                                                                          |
| EPI_ISL_2442098, EPI_ISL_2442113, EPI_ISL_450523                                                                                                      | Centro de Investigaçãõ em Saúde de Manhiça (CISM) & ISGlobal, Institut de Salut Global de Barcelona                                                | Institute of Microbiology, Universidad San Francisco de Quito                                                                                                                                                                                           | Belén Prado-Vivar; Bernardo Gutiérrez; Derly Andrade; Edith Lopez; Fernando Espinoza; Gabriel Morey; Gabriel Trueba; Jose Pedro Barberan; Juan Carlos Fernandez; Juan José Guadalupe; Michelle Grunauer; Monica Becerra-Wong; Patricio Rojas-Silva; Paul Cárdenas; Ruben Armas; Sully Márquez; Verónica Barragán                                                                                                                                                                                                                                                                          |
| EPI_ISL_2798876, EPI_ISL_2798895, EPI_ISL_2798922, EPI_ISL_2798996, EPI_ISL_2799000, EPI_ISL_2799099, EPI_ISL_2799215, EPI_ISL_2799803                | Centrālā Laboratorija                                                                                                                              | Instituto de Biomedicina de València - CSIC                                                                                                                                                                                                             | Alfredo Mayor; Arsenia Massinga; Inacio Mandomando; Irving Cancino; Inaki Comas; Manoli Torres Puente; Santiago Jiménez-Serrano                                                                                                                                                                                                                                                                                                                                                                                                                                                           |
| see above                                                                                                                                             | Centrālā Laboratorija, SIA                                                                                                                         | Latvian Biomedical Research and Study Centre                                                                                                                                                                                                            | Ivars Silamiķelis; Jana Osīte; Jānis Kloviņš; Kaspars Megnis; Marta Priedīte; Monta Ustinova; Stella Lapīņa; Uga Dumpis; Vita Rovīte; Nikita Zrelous                                                                                                                                                                                                                                                                                                                                                                                                                                      |
| EPI_ISL_486412, EPI_ISL_492988, EPI_ISL_861489                                                                                                        | Centrālā laboratorija                                                                                                                              | Latvian Biomedical Research and Study Centre                                                                                                                                                                                                            | Ivars Silamiķelis; Jana Osīte; Jānis Kloviņš; Kaspars Megnis; Marta Priedīte; Monta Ustinova; Stella Lapīņa; Uga Dumpis; Vita Rovīte; Nikita Zrelous                                                                                                                                                                                                                                                                                                                                                                                                                                      |
| EPI_ISL_2504131, EPI_ISL_2504133, EPI_ISL_2504138, EPI_ISL_2504139, EPI_ISL_2504141, EPI_ISL_2504142                                                  | Cerballiance Côte d'Azur                                                                                                                           | CERBA LAB                                                                                                                                                                                                                                               | Adjtouth Z; Mangiarotti T; Prots L                                                                                                                                                                                                                                                                                                                                                                                                                                                                                                                                                        |
| EPI_ISL_2504141, EPI_ISL_2504142                                                                                                                      | Cerballiance-IDF                                                                                                                                   | Cerba lab                                                                                                                                                                                                                                               | Aude Lesenne; Bénédicte Roquebert; Emmanuel Lecorche; Kader Merah; Laura Verdurme; Patrice Herisson; Sabine Trombert-Paolantoni; Stéphanie Haim-Boukobza; Thierry Collin                                                                                                                                                                                                                                                                                                                                                                                                                  |
| EPI_ISL_753955, EPI_ISL_754011                                                                                                                        | Chantal Biya International Reference Centre (CIRCB)                                                                                                | International Center for Genetic Engineering and Biotechnology (ICGEB) and ARGO Open Lab for Genome Sequencing                                                                                                                                          | Alessandro Marcello; Alexis Ndjolo; Celine Nkenfu; Collins Chenwi; Danilo Licastro; Desire Takou; Emanuele Orsini; Grace Angong Belournou; Joseph Fokam; Ndine Fainguem; Simeone Dal Monego                                                                                                                                                                                                                                                                                                                                                                                               |
| EPI_ISL_2987446                                                                                                                                       | Charité Universitätsmedizin Berlin, Institut für Virologie/Labor Berlin                                                                            | Charité Universitätsmedizin Berlin, Institut für Virologie                                                                                                                                                                                              | Barbara Mühlemann; Christian Drosten; Julia Schneider; Jörn Beheim-Schwarzbach; Talitha Veith; Terry Jones; Victor M Corman                                                                                                                                                                                                                                                                                                                                                                                                                                                               |
| EPI_ISL_735497                                                                                                                                        | Chattoqram Maa-O-Shishu Hospital / Disease Biology & Molecular Epidemiology Research Lab, University of Chittagong                                 | Virology Laboratory, International Centre for Diarrhoeal Disease Research, Bangladesh (ICDDR,B)                                                                                                                                                         | Adnan Mannan; Fahim Reza; H. M. Hamidullah Mehedi; Md. Abdur Rob; Md. Minhazul Hoque; Mohammad Enayett Hossain; Moju Miah; Mustafizur Rahman; Nahid Sultana; Rajdeep Biswas; Rashedul Hasan; Sanjoy Biswas                                                                                                                                                                                                                                                                                                                                                                                |
| EPI_ISL_1211989                                                                                                                                       | Chattoqram Veterinary and Animal Sciences University                                                                                               | Central Biological Research Laboratory and Department of Biochemistry and Molecular Biology                                                                                                                                                             | H. M. Abdullal Ah Masud; Imam Hossen; Md. Arif Hossain; Md. Imranul Hoq; Md. Khondakar Raziur Rahman; Md. Omer Faruq; Mohammad Omar Faruque; Robiul Hasan Bhuiyan; Sajib Rudra; Shanta Paul                                                                                                                                                                                                                                                                                                                                                                                               |
| EPI_ISL_419297, EPI_ISL_419298, EPI_ISL_419309                                                                                                        | Chemisches und Veterinäruntersuchungsamt Ostwestfalen-Lippe                                                                                        | Robert Koch Institute                                                                                                                                                                                                                                   |                                                                                                                                                                                                                                                                                                                                                                                                                                                                                                                                                                                           |
| EPI_ISL_700332, EPI_ISL_906087, EPI_ISL_1360422, EPI_ISL_1634454, EPI_ISL_1634455, EPI_ISL_2446012, EPI_ISL_2692860, EPI_ISL_2692865, EPI_ISL_2692876 | Chiba Prefectural Institute of Public Health                                                                                                       | Pathogen Genomics Center, National Institute of Infectious Diseases                                                                                                                                                                                     | Hajime Kamiya; Kentaro Itokawa; Makoto Kuroda; Masakatsu Taira; Masanori Hashino; Motoi Suzuki; Rina Tanaka; Tsuyoshi Sekizuka; Yushi Hachisu                                                                                                                                                                                                                                                                                                                                                                                                                                             |
| see above                                                                                                                                             | Child Health Research Foundation                                                                                                                   | Child Health Research Foundation                                                                                                                                                                                                                        | Afroza Akter Tanni; Arif Mohammad Tanmoy; CHRf Bangladesh Genomics Team; Md Hafizur Rahman; Roly Malaker; Samir K Saha; Senjuti Saha; Sharmistha Goswami; Syed Mukhtadir Al Sium                                                                                                                                                                                                                                                                                                                                                                                                          |
| EPI_ISL_2445988                                                                                                                                       | Chittagong General Hospital                                                                                                                        | Child Health Research Foundation                                                                                                                                                                                                                        | Adnan Mannan; CHRf Bangladesh Genomics Team; H. M. Hamidullah Mehedi; Md. Abdur Rob; Md. Minhazul Hoque; Rajdeep Biswas                                                                                                                                                                                                                                                                                                                                                                                                                                                                   |
| EPI_ISL_1970348                                                                                                                                       | Chongqing International Travel Health Care Center                                                                                                  | Chongqing Municipal Center for Disease Control and Prevention                                                                                                                                                                                           | Dong Wang; Haiyan Wen; Hua Ling; Lan Zhou; Mingyue Wang; Rong Rong; Sheng Ye; Shuang Chen; Wenge Tang; Yun Tang; Zhangping Tan; Zhen Yu                                                                                                                                                                                                                                                                                                                                                                                                                                                   |
| EPI_ISL_1970347                                                                                                                                       | Chongqing Yuzhong District Center For Disease Control And Prevention                                                                               | Chongqing Municipal Center for Disease Control and Prevention                                                                                                                                                                                           | Hua Ling; Jiaqi Li; Mingyue Wang; Rong Rong; Sheng Ye; Shuang Chen; Wenge Tang; Yingbing Zhou; Yun Tang; Yuyue Luo; Zhangping Tan; Zhen Yu                                                                                                                                                                                                                                                                                                                                                                                                                                                |
| EPI_ISL_3038908                                                                                                                                       | Chulabhorn Hospital                                                                                                                                | National Institute of Health, Department of Medical Sciences, Ministry of Public Health, Thailand                                                                                                                                                       | ; Natchaya Khidsang; Nuttida Thongpramul; Pakorn Piromtong; Pilailuk Okada; Ratana Tacharoenmuang; Siripaporn Phuyung; Sittiporn Parmeen; Sunthareeya Waicharoen; Thanutsapa Thanadachakul; Warawan Wongboot; sirikanda wimol                                                                                                                                                                                                                                                                                                                                                             |
| EPI_ISL_2248847, EPI_ISL_2248852, EPI_ISL_2248853, EPI_ISL_2445744                                                                                    | Cintramedica                                                                                                                                       | Instituto Nacional de Saude (INSA)                                                                                                                                                                                                                      | Borges et al                                                                                                                                                                                                                                                                                                                                                                                                                                                                                                                                                                              |
| EPI_ISL_1722998, EPI_ISL_1844396, EPI_ISL_1363787                                                                                                     | Clemenshospital - Alexianer Clemenshospital MÄ%nster                                                                                               | Robert Koch Institute                                                                                                                                                                                                                                   |                                                                                                                                                                                                                                                                                                                                                                                                                                                                                                                                                                                           |
| EPI_ISL_1250842                                                                                                                                       | Clin & Gen Lab                                                                                                                                     | Microbiologia Molecular, Instituto SELADIS, Universidad Mayor de San Andrés                                                                                                                                                                             | Aneth Vasquez Michel; Oscar M. Rollano-Peñaloza                                                                                                                                                                                                                                                                                                                                                                                                                                                                                                                                           |
| EPI_ISL_2987572                                                                                                                                       | Clin & Gen Lab                                                                                                                                     | Molecular Genetics Laboratory, Instituto de Investigaciones Químicas, Universidad Mayor de San Andrés                                                                                                                                                   | Aneth Vasquez Michel; Oscar M. Rollano-Peñaloza                                                                                                                                                                                                                                                                                                                                                                                                                                                                                                                                           |
| EPI_ISL_462450, EPI_ISL_462464                                                                                                                        | Clinic of infective diseases                                                                                                                       | Laboratory of virology and molecular diagnostics, Institute of Public Health                                                                                                                                                                            | Boshevska G; Janchevska E.; Kuzmanovska M                                                                                                                                                                                                                                                                                                                                                                                                                                                                                                                                                 |
| EPI_ISL_1300651, EPI_ISL_2938102, EPI_ISL_2938104, EPI_ISL_2938106, EPI_ISL_2938118                                                                   | Clinical Center, University of Sarajevo                                                                                                            | Charite Universitätsmedizin Berlin, Institute of Virology                                                                                                                                                                                               | Almedina Hadzihanovic-Moro; Amela Dedeic-Ljubovic; Barbara Muehlemann; Christian Drosten; Irma Salimovic-Besic; Jörn Beheim-Schwarzbach; Julia Schneider; Selma Mutevelic; Suzana Arapcic; Talitha Veith; Terry Jones; Victor M Corman                                                                                                                                                                                                                                                                                                                                                    |
| EPI_ISL_2652206, EPI_ISL_2652209, EPI_ISL_3021385, EPI_ISL_3021390                                                                                    | Clinical Center, University of Sarajevo; Unit for Clinical Microbiology                                                                            | Clinical Center, University of Sarajevo; Unit for Clinical Microbiology                                                                                                                                                                                 | Amela Dedeić-Ljubović; Edina Zahirović; Golubinka Boshevska; Irma Salimović-Bešić; Maja Kuzmanovska; Sandra Vegar-Zubović; Sebija Izetbegović; Suzana Arapčić                                                                                                                                                                                                                                                                                                                                                                                                                             |
| EPI_ISL_516431, EPI_ISL_678259                                                                                                                        | Clinical Emergency County Hospital, Craiova                                                                                                        | Cantacuzino Institute Virology                                                                                                                                                                                                                          | Carmen Cherciu; Luiza Ustea; Mihaela Lazar; Mihaela Oprea; Nicoleta Paraschiv; Sorin Dinu                                                                                                                                                                                                                                                                                                                                                                                                                                                                                                 |
| EPI_ISL_3020158                                                                                                                                       | Clinical Hospital - Shtip                                                                                                                          | Research Center for Genetic Engineering and Biotechnology "Georgi D. Efremov", Macedonian Academy of Sciences and Arts                                                                                                                                  | RCGEB - MASA                                                                                                                                                                                                                                                                                                                                                                                                                                                                                                                                                                              |
| EPI_ISL_447454, EPI_ISL_968146, EPI_ISL_1334559                                                                                                       | Clinical Hospital of Infectious Diseases „Sfanta Parascheva“ Iasi                                                                                  | National Institute of Infectious Diseases-Prof. Dr. Matei Bals Molecular Diagnostics Laboratory                                                                                                                                                         | Corina Casangiu; Dan Otelea; Leontina Banica; Marius Surleac; Petre Milu; Robert Hohan; Simona Paraschiv                                                                                                                                                                                                                                                                                                                                                                                                                                                                                  |
| EPI_ISL_2535703, EPI_ISL_2608412                                                                                                                      | Clinical Microbiology Laboratory, Sheba Medical Center                                                                                             | Stern Lab                                                                                                                                                                                                                                               | Stern Lab                                                                                                                                                                                                                                                                                                                                                                                                                                                                                                                                                                                 |
| EPI_ISL_581842, EPI_ISL_581843, EPI_ISL_830804, EPI_ISL_930860, EPI_ISL_2102098, EPI_ISL_2270056, EPI_ISL_2768083                                     | Clinical Molecular Microbiology Laboratory, UNC Hospital                                                                                           | Dirk Dittmer                                                                                                                                                                                                                                            | Andrea McDaniel-Harper; Angelica Juarez; Ashwini Roy-Chaudhury; Billy Fisher; Blossom Damanian.; Brent A. Eason; Cameroon Grant; Carolina Caro-Vegas; Cecilia Thompson; Danielle Chappell; Dirk Dittmer; Evelyn Hoffman; Jason Smedberg; Jason Wong; Justin T. Landis; Linda Pluta; Melissa B. Miller; Patricio Cano; Razia Moorad; Ryan McNamara; Shawn Hawken                                                                                                                                                                                                                           |
|                                                                                                                                                       | Clinical Research Centre Hospital Sibü                                                                                                             | Institute of Health and Community Medicine                                                                                                                                                                                                              | Chan Chia Jui; Chua Hock Hin; David Perera; Ooi Mong How; Tonnie Sia Loong Loong; Wong Jyn Shan; Wong Kiing Aik                                                                                                                                                                                                                                                                                                                                                                                                                                                                           |
|                                                                                                                                                       | Clinical Research Centre, Sarawak General Hospital                                                                                                 | Institute of Health and Community Medicine                                                                                                                                                                                                              | Chan Chia Jui; Chua Hock Hin; David Perera; Ooi Mong How; Tonnie Sia Loong Loong; Wong Jyn Shan; Wong Kiing Aik                                                                                                                                                                                                                                                                                                                                                                                                                                                                           |
|                                                                                                                                                       |                                                                                                                                                    |                                                                                                                                                                                                                                                         |                                                                                                                                                                                                                                                                                                                                                                                                                                                                                                                                                                                           |

|                                                                                                                                                                                                                                                                                                                                                                                                                                                       |                                                                                                                                                                                         |                                                                                                                                                                                                 |                                                                                                                                                                                                                                                                                                                                                                                                                                                                                                                                                                                                    |
|-------------------------------------------------------------------------------------------------------------------------------------------------------------------------------------------------------------------------------------------------------------------------------------------------------------------------------------------------------------------------------------------------------------------------------------------------------|-----------------------------------------------------------------------------------------------------------------------------------------------------------------------------------------|-------------------------------------------------------------------------------------------------------------------------------------------------------------------------------------------------|----------------------------------------------------------------------------------------------------------------------------------------------------------------------------------------------------------------------------------------------------------------------------------------------------------------------------------------------------------------------------------------------------------------------------------------------------------------------------------------------------------------------------------------------------------------------------------------------------|
| see above                                                                                                                                                                                                                                                                                                                                                                                                                                             | Clinical Virology                                                                                                                                                                       | Clinical Bacteriology                                                                                                                                                                           | Adrian Egli; Alexander Gensch; Alfredo Mari; Christian Nickel; Fanny Wegner; Hans Hirsch; Hans Pargger; Helena MB Seth-Smith; Julia Bielicki; Karoline Leuzinger; Kirstine K. Soegaard; Madlen Stange; Manuel Battegay; Martin Siegemund; Michael Osthoff; Michael Schweitzer; Myrta Brunner; Rita Schneider-Silfemalea; Rita Schneider-Sliwa; Roland Bingisser; Sarah Tschudin-Sulter; Simon Fuchs; Stefano Bassetti; Tim Roloff                                                                                                                                                                  |
| EPI_ISL_2035560                                                                                                                                                                                                                                                                                                                                                                                                                                       | Clinical Virology                                                                                                                                                                       | Clinical Virology                                                                                                                                                                               | Anissa Chouikha; Henda Triki; Kais Ghedira; Mariem Gdoura; Sondos Haddad; Wasfi Fares                                                                                                                                                                                                                                                                                                                                                                                                                                                                                                              |
| EPI_ISL_605804                                                                                                                                                                                                                                                                                                                                                                                                                                        | Clinical Virology Laboratory, Institute of Liver and Biliary Sciences                                                                                                                   | ILBS - IGIB                                                                                                                                                                                     | Abhishek Padhi; Ekta Gupta; Jaswinder Singh Maras; Reshu Agarwal; Sheetalnath Rooge; Shridhar Sivasubbu; Shvetank Sharma; Vinod Scaria                                                                                                                                                                                                                                                                                                                                                                                                                                                             |
| EPI_ISL_2370909                                                                                                                                                                                                                                                                                                                                                                                                                                       | Clinical and Basic Functional Sciences, Department of Microbiology                                                                                                                      | Greek Genome Center, Biomedical Research Foundation of the Academy of Athens (BRFAA)                                                                                                            | Dimitrios Thanos; Emmanouil Athanasiadis; Giannis Vatsellas; Katerina Zoi; Konstantina Gartzonika; Theodoros Loupis                                                                                                                                                                                                                                                                                                                                                                                                                                                                                |
| EPI_ISL_1397826                                                                                                                                                                                                                                                                                                                                                                                                                                       | Columbia University Irving Medical Center                                                                                                                                               | Wadsworth Center, New York State Department of Health                                                                                                                                           | Alexis Russel; Daryl M. Lamson; Erasmus Schneider; Erica Lasek-Nesselquist; John Kelly; Jonathan Plitnick; Kirsten St. George; Matthew Shudt; Melissa A Leisner; Navjot Singh                                                                                                                                                                                                                                                                                                                                                                                                                      |
| EPI_ISL_2383896                                                                                                                                                                                                                                                                                                                                                                                                                                       | Commonwealth Healthcare Center                                                                                                                                                          | Centers for Disease Control and Prevention Division of Viral Diseases, Pathogen Discovery                                                                                                       | Alison Lauffer Halpin; Ben L. Rambo-Martin; Clinton R. Paden; Dakota Howard; Darlene Wagner; Dave Wentworth; Dhvani Batra; Jasmine Padilla; Justin Lee; Katie Dillon; Krista Queen; Kristen Knipe; Kristine Lacey; Mark Burroughs; Matthew Scherer; Mili Sheth; Peter Cook; Sam Shepard; Sarah Nobles; Shoshona Le; Suxiang Tong; Vivien Dugan; Yvette Unarumhi                                                                                                                                                                                                                                    |
| EPI_ISL_632271, EPI_ISL_632285, EPI_ISL_682300, EPI_ISL_1660433, EPI_ISL_1660444, EPI_ISL_1660449, EPI_ISL_1660464, EPI_ISL_1660470, EPI_ISL_2466680, EPI_ISL_2622084, EPI_ISL_2663322, EPI_ISL_2663323, EPI_ISL_2715285, EPI_ISL_2715288, EPI_ISL_2715289, EPI_ISL_2812541, EPI_ISL_2932623, EPI_ISL_2932641, EPI_ISL_2932642, EPI_ISL_2932655, EPI_ISL_2932663, EPI_ISL_2932666, EPI_ISL_2932669, EPI_ISL_2932673, EPI_ISL_2932678, EPI_ISL_2992091 | Communicable Disease Laboratory, Public Health Directorate                                                                                                                              | Communicable Disease Laboratory, Public Health Directorate                                                                                                                                      | AlAbbas, Z.; AlHujairi, Z.; AlTaif, Z.; AlWasti, H.; Almoamen, G.; Altaif, Z.; Alwasti, H.; Marhoon, A.                                                                                                                                                                                                                                                                                                                                                                                                                                                                                            |
| see above                                                                                                                                                                                                                                                                                                                                                                                                                                             | Concordia Clinic                                                                                                                                                                        | NHLS/UCT                                                                                                                                                                                        | Arash Iranzadeh; Bruna Galvao; Carolyn Williamson; Deelan Doolabh; Diana Hardie; Innocent Mudau; Kruger Marais; Lynn Tyers; Marvin Hsiao; Stephen Korsman                                                                                                                                                                                                                                                                                                                                                                                                                                          |
| EPI_ISL_454110                                                                                                                                                                                                                                                                                                                                                                                                                                        | ControlVet                                                                                                                                                                              | Instituto Nacional de Saude (INSA)                                                                                                                                                              | Borges et al                                                                                                                                                                                                                                                                                                                                                                                                                                                                                                                                                                                       |
| EPI_ISL_2636156                                                                                                                                                                                                                                                                                                                                                                                                                                       | Corona-Testzentrum ifp Institut für Produktqualität GmbH                                                                                                                                | Robert Koch Institute                                                                                                                                                                           |                                                                                                                                                                                                                                                                                                                                                                                                                                                                                                                                                                                                    |
| EPI_ISL_3014093, EPI_ISL_3014108, EPI_ISL_3014126                                                                                                                                                                                                                                                                                                                                                                                                     | Cotugno                                                                                                                                                                                 | TIGEM                                                                                                                                                                                           | Antonio Grimaldi Patrizia Annunziata Francesco Panariello Biancamaria Pierr Claudia Tiberio Teresa Giuliano Valentina Bouche Chiara Colantuono Maria Concetta Cuomo Denise Di Concilio Lucio Di Filippo Anna Manfredi Marcello Salvi Antonio Limone Luigi Atripaldi Pellegrino Cerino Andrea Ballabio Davide Cacchiarelli                                                                                                                                                                                                                                                                          |
| EPI_ISL_1084757                                                                                                                                                                                                                                                                                                                                                                                                                                       | Croatian Institute of Public Health                                                                                                                                                     | Croatian Institute of Public Health                                                                                                                                                             | Irena Tabain; Ivana Ferencak                                                                                                                                                                                                                                                                                                                                                                                                                                                                                                                                                                       |
| EPI_ISL_1695973                                                                                                                                                                                                                                                                                                                                                                                                                                       | DC Public Health Lab/ Dept. of Forensic Sciences                                                                                                                                        | Centers for Disease Control and Prevention Division of Viral Diseases, Pathogen Discovery                                                                                                       | Alison Lauffer Halpin; Ben L. Rambo-Martin; Clinton R. Paden; Dakota Howard; Darlene Wagner; Dave Wentworth; Dhvani Batra; Jasmine Padilla; Justin Lee; Katie Dillon; Krista Queen; Kristen Knipe; Kristine Lacey; Mark Burroughs; Matthew Scherer; Mili Sheth; Peter Cook; Sam Shepard; Sarah Nobles; Shoshona Le; Suxiang Tong; Vivien Dugan; Yvette Unarumhi                                                                                                                                                                                                                                    |
| EPI_ISL_1094341                                                                                                                                                                                                                                                                                                                                                                                                                                       | DC Public Health Lab/ Dept. of Forensic Sciences                                                                                                                                        | Respiratory Viruses Branch, Division of Viral Diseases, Centers for Disease Control and Prevention                                                                                              | Anna Montmayeur; Anna Uehara; Ben L. Rambo-Martin; Clinton R. Paden; Dhvani Batra; Haibin Wang; Jasmine Padilla; Jing Zhang; Justin Lee; Krista Queen; Lori Rowe; Mark Burroughs; Mili Sheth; Peter W. Cook; Rachel Marine; Sarah Nobles; Suxiang Tong; Yan Li; Ying Tao                                                                                                                                                                                                                                                                                                                           |
| EPI_ISL_2779433                                                                                                                                                                                                                                                                                                                                                                                                                                       | DFMH                                                                                                                                                                                    | USAMRD-A, Basic Science Laboratory                                                                                                                                                              | Alan Lemtudo; Beth Mutai; Brian Andika; Carol Kifude; Clement Masakwe; Eric Muthanje; Esther Omusen; Faith Sigei; Gathii Kimita; George Awinda; John Waitumbi; Josphat Nyataya; Rachel Githii; Rehema Liyaji; Stephen Ochola                                                                                                                                                                                                                                                                                                                                                                       |
| EPI_ISL_2342561, EPI_ISL_2342562, EPI_ISL_2342563                                                                                                                                                                                                                                                                                                                                                                                                     | DNA Laboratories Sdn Bhd                                                                                                                                                                | Malaysia Genome Institute                                                                                                                                                                       | Azrin Ahmad; Ezizza Kasim; Irni Suhayu Sapijan; Mohd Faizal Abu Bakar; Mohd Noor Mat Isa; Nor Afza Johari.; Nurhezreen Md Iqbal; Shamsidar Sopie; Siti Noraini Othman; Wong Yong Wee; Yusuf Muhammad Noor                                                                                                                                                                                                                                                                                                                                                                                          |
| EPI_ISL_2983222, EPI_ISL_2983224, EPI_ISL_2987211, EPI_ISL_2987214                                                                                                                                                                                                                                                                                                                                                                                    | DNA Labs                                                                                                                                                                                | National Reference Laboratory, Nigeria Centre for Disease Control                                                                                                                               | Anthony Ahumibe; Catherine Okoi; Chimaobi Chukwu; Dr Chikwe Ihekweazu; Dr Ndodo Nnaemeka; Dr Omoare Adesuyi; Nwando Mba; Olusola Anuoluwapo Akanbi                                                                                                                                                                                                                                                                                                                                                                                                                                                 |
| EPI_ISL_683829                                                                                                                                                                                                                                                                                                                                                                                                                                        | DOHMH Central Harlem                                                                                                                                                                    | New York City Public Health Laboratory                                                                                                                                                          | Jade Wang; et al.                                                                                                                                                                                                                                                                                                                                                                                                                                                                                                                                                                                  |
| EPI_ISL_823949                                                                                                                                                                                                                                                                                                                                                                                                                                        | DOHMH Jamaica                                                                                                                                                                           | New York City Public Health Laboratory                                                                                                                                                          | Jade Wang; et al.                                                                                                                                                                                                                                                                                                                                                                                                                                                                                                                                                                                  |
| EPI_ISL_857252                                                                                                                                                                                                                                                                                                                                                                                                                                        | DOHMH Morrisania                                                                                                                                                                        | New York City Public Health Laboratory                                                                                                                                                          | Jade Wang; et al.                                                                                                                                                                                                                                                                                                                                                                                                                                                                                                                                                                                  |
| EPI_ISL_745438                                                                                                                                                                                                                                                                                                                                                                                                                                        | DOHMH PHL                                                                                                                                                                               | New York City Public Health Laboratory                                                                                                                                                          | Jade Wang; et al.                                                                                                                                                                                                                                                                                                                                                                                                                                                                                                                                                                                  |
| EPI_ISL_1181670, EPI_ISL_1511145                                                                                                                                                                                                                                                                                                                                                                                                                      | DPHL                                                                                                                                                                                    | Delaware Public Health Lab                                                                                                                                                                      | Gregory Hovan; Rebecca Savage                                                                                                                                                                                                                                                                                                                                                                                                                                                                                                                                                                      |
| EPI_ISL_2593764, EPI_ISL_2595726, EPI_ISL_2595860, EPI_ISL_2596341, EPI_ISL_2596803, EPI_ISL_2597228, EPI_ISL_2597229, EPI_ISL_2597312, EPI_ISL_2612300                                                                                                                                                                                                                                                                                               | DSMRC                                                                                                                                                                                   | DSMRC                                                                                                                                                                                           | Khine Zaw Oo; Ko Ko Lwin; Ko Ko Win; Kyeey Myint; Nay Myo Aung; Pai Khant Kyaw; Phyo Kyaw Aung; Thet Wai Oo; Zaw Win Htun                                                                                                                                                                                                                                                                                                                                                                                                                                                                          |
| see above                                                                                                                                                                                                                                                                                                                                                                                                                                             | DYOMEDEA NEOLAB                                                                                                                                                                         | CNR Virus des Infections Respiratoires - France SUD                                                                                                                                             | Antonin Bal; Bruno Lina; Bruno Simon; Gregory Destras; Gwendolyne Burfin; Hadrien Regue; Laurence Josset; Martine Valette; Quentin Semanas                                                                                                                                                                                                                                                                                                                                                                                                                                                         |
| EPI_ISL_2894008                                                                                                                                                                                                                                                                                                                                                                                                                                       | DYOMEDEA-LABORATOIRE DE LA SAUVEGARDE                                                                                                                                                   | CNR Virus des Infections Respiratoires - France SUD                                                                                                                                             | Antonin Bal; Bruno Lina; Gregory Destras; Gwendolyne Burfin; Hadrien Regue; Laurence Josset; Martine Valette; Quentin Semanas                                                                                                                                                                                                                                                                                                                                                                                                                                                                      |
| EPI_ISL_416542, EPI_ISL_416543                                                                                                                                                                                                                                                                                                                                                                                                                        | Dasman Diabetes Institute                                                                                                                                                               | Dasman Diabetes Institute                                                                                                                                                                       | Ebaa AlOzairi; Fahd Al-Mulla; Motasem Melhem; Qais Al-Duwairi; Rasheeba Iqbal; Sara Al-Qabandi; Sumi John                                                                                                                                                                                                                                                                                                                                                                                                                                                                                          |
| EPI_ISL_416541                                                                                                                                                                                                                                                                                                                                                                                                                                        | Dasman Diabetes Institute and Virology Laboratory Ministry of Health                                                                                                                    | Dasman Diabetes Institute                                                                                                                                                                       | Ebaa AlOzairi; Fahd Al-Mulla; Motasem Melhem; Qais Al-Duwairi; Rasheeba Iqbal; Sara Al-Qabandi; Sumi John                                                                                                                                                                                                                                                                                                                                                                                                                                                                                          |
| EPI_ISL_2140727                                                                                                                                                                                                                                                                                                                                                                                                                                       | De Rust (Blommenek) Clinic wc DRC                                                                                                                                                       | NHLS/UCT                                                                                                                                                                                        | Arash Iranzadeh; Bruna Galvao; Carolyn Williamson; Deelan Doolabh; Diana Hardie; Innocent Mudau; Kruger Marais; Lynn Tyers; Marvin Hsiao; Stephen Korsman                                                                                                                                                                                                                                                                                                                                                                                                                                          |
| EPI_ISL_2372406, EPI_ISL_2648206, EPI_ISL_2648207, EPI_ISL_2648208, EPI_ISL_2648209, EPI_ISL_2648211, EPI_ISL_2648213, EPI_ISL_2648214, EPI_ISL_2648215, EPI_ISL_2648217, EPI_ISL_2648218, EPI_ISL_2648219, EPI_ISL_2648220                                                                                                                                                                                                                           | Debswana Orapa Mine Hospital Laboratory                                                                                                                                                 | Botswana Harvard HIV Reference Laboratory                                                                                                                                                       | Boitumelo Zuze; Botshelo Radibe; Dorcas Maruapula; Joseph Makhema; Keoratile Ntshambiwa; Kgomotso Moruisi; Koketso Maotwe; Legodile Kooepile; Lesedi Magama; Madisa Mine; Mosepele Mosepele; Mpo Molapisi; Ontlametse T. Bareng; Pamela Smith-Lawrence; Roger Shapiro; Shahin Lockman; Sikhulile Moyo; Simani Gaseitsiwe; Thongbotho Mphoyakgosi; Wonderful T. Choga                                                                                                                                                                                                                               |
| EPI_ISL_812293                                                                                                                                                                                                                                                                                                                                                                                                                                        | Delaware Public Health Lab                                                                                                                                                              | Delaware Public Health Lab                                                                                                                                                                      | Gregory Hovan                                                                                                                                                                                                                                                                                                                                                                                                                                                                                                                                                                                      |
| EPI_ISL_693691, EPI_ISL_693730                                                                                                                                                                                                                                                                                                                                                                                                                        | Delaware Public Health Laboratory                                                                                                                                                       | Delaware Public Health Laboratory                                                                                                                                                               | Gregory Hovan                                                                                                                                                                                                                                                                                                                                                                                                                                                                                                                                                                                      |
| EPI_ISL_2432518, EPI_ISL_2432922, EPI_ISL_2432953                                                                                                                                                                                                                                                                                                                                                                                                     | Demy Health                                                                                                                                                                             | National Reference Laboratory, Nigeria Centre for Disease Control                                                                                                                               | Anthony Ahumibe; Catherine Okoi; Chimaobi Chukwu; Dr Chikwe Ihekweazu; Dr Ndodo Nnaemeka; Dr Omoare Adesuyi; Grace Esebanmen; Naidoo Dhamari; Nwando Mba; Olusola Anuoluwapo Akanbi                                                                                                                                                                                                                                                                                                                                                                                                                |
| EPI_ISL_430796                                                                                                                                                                                                                                                                                                                                                                                                                                        | Departamento de Biología y genética molecular, IACA Laboratorios.                                                                                                                       | Área de Secuenciación del Laboratorio de Virología del Hospital de Niños Dr. Ricardo Gutiérrez on behalf of 'Proyecto Argentino Interinstitucional de genómica de SARS-CoV-2' (PAIS Consortium) | A; AS; E; Goya; LE; Lusso; MI; MS; Masciovecchio MV; Mistchenko; Nabaes Jodar; Natale; S; Streitenberger ER; Suárez; Tittarelli; Valinotto; Viegas, M.                                                                                                                                                                                                                                                                                                                                                                                                                                             |
| EPI_ISL_949238                                                                                                                                                                                                                                                                                                                                                                                                                                        | Departamento de Microbiología, CDB, Hospital Clínic, Barcelona                                                                                                                          | SeqCOVID-SPAIN consortium/IBV(CSIC)                                                                                                                                                             | Aida Peiró and SeqCOVID-SPAIN consortium; Andrea Vergara; Elisa Rubio; Jéssica Navero; Mikel Martínez                                                                                                                                                                                                                                                                                                                                                                                                                                                                                              |
| EPI_ISL_1340753, EPI_ISL_1340755, EPI_ISL_1340756, EPI_ISL_1340758                                                                                                                                                                                                                                                                                                                                                                                    | Departamento de Virología, Laboratorio Central de Salud Pública, Avenida Venezuela y Teniente Escurrea, Asunción, Paraguay                                                              | Laboratory of Respiratory Viruses and Measles, Oswaldo Cruz Institute, FIOCRUZ                                                                                                                  | Alice Sampaio Rocha; Ana Carolina Mendonca; Anna Carolina Paixao; Cynthia Vazquez; Fernando Motta; Luciana Appolinario; Marilda Siqueira on behalf of the Fiocruz COVID-19 Genomic Surveillance Network; Paola Resende; Renata Serrano Lopes                                                                                                                                                                                                                                                                                                                                                       |
| EPI_ISL_516923                                                                                                                                                                                                                                                                                                                                                                                                                                        | Department for Molecular Diagnostics, Centre for Medical Microbiology, Institute of Public Health of Montenegro                                                                         | Charité Universitätsmedizin Berlin, Institut für Virologie                                                                                                                                      | Barbara Muehleemann; Christian Drostén; Julia Schneider; Jörn Beheim-Schwarzbach; Marija Govedarica and Danijela Vujošević; Talitha Veith; Terry Jones; Victor M Corman                                                                                                                                                                                                                                                                                                                                                                                                                            |
| EPI_ISL_471529, EPI_ISL_477169, EPI_ISL_754180, EPI_ISL_1914665, EPI_ISL_1914938, EPI_ISL_1921859, EPI_ISL_3204236, EPI_ISL_3204239, EPI_ISL_3204245                                                                                                                                                                                                                                                                                                  | Department for Virology, Molecular Biology and Genome Research, R. G. Lugar Center for Public Health Research, National Center for Disease Control and Public Health (NCDC) of Georgia. | Department for Virology, Molecular Biology and Genome Research, R. G. Lugar Center for Public Health Research, National Center for Disease Control and Public Health (NCDC) of Georgia.         | Adam Kotarashvili; Amiran Gamkrelidze.; Ana Papkiauri; Ann Machabishvili; Anna Kasradze; Davit Tsaguria; Ekaterine Khmaladze; Ekaterine Zangaladze; Ekaterine Zhghenti; Giorgi Gogoladze; Giorgi Tomashvili; Gvantsa Brachveli; Gvantsa Chanturia; Irma Burjanadze; Ketevan Sidamonidze; Khatuna Zakhashvili; Lela Sabadze; Lela Urushadze; Magda Dgebudze; Maia Alkhasashvili; Mari Gavashelidze; Mariam Zakalashvili; Marine Murtskhvaladze; Meri Pantsulaia; Nato Kotaria; Nino Bershvili; Paata Imnadze; Roena Sukhishvili; Salome Javashvili; Tamar Jashishvili; Tata Imnadze; Tea Tvedoradze |
| EPI_ISL_1642768                                                                                                                                                                                                                                                                                                                                                                                                                                       | Department für Labormedizin Abteilung III Bereich Molekulare Diagnostik Universitätsklinikum Halle(Saale)                                                                               | Robert Koch Institute                                                                                                                                                                           |                                                                                                                                                                                                                                                                                                                                                                                                                                                                                                                                                                                                    |
| EPI_ISL_2723562, EPI_ISL_2896229                                                                                                                                                                                                                                                                                                                                                                                                                      | Department of Acute Infectious Diseases Control and Prevention, Yunnan Provincial Center for Disease Control and Prevention                                                             | Department of Acute Infectious Diseases Control and Prevention, Yunnan Provincial Center for Disease Control and Prevention                                                                     | Jienn Zhou; Meiling Zhang; Senquan Jia; Xiaoqing Fu; Zhaosheng Liu                                                                                                                                                                                                                                                                                                                                                                                                                                                                                                                                 |
| EPI_ISL_2429651, EPI_ISL_2665812, EPI_ISL_2666405, EPI_ISL_2667413, EPI_ISL_2669906, EPI_ISL_2670493, EPI_ISL_2670876, EPI_ISL_2671330, EPI_ISL_2680019, EPI_ISL_2684126, EPI_ISL_2819459, EPI_ISL_2854368, EPI_ISL_2854578, EPI_ISL_2862744, EPI_ISL_2971522, EPI_ISL_2992466, EPI_ISL_2992648, EPI_ISL_3029549                                                                                                                                      | Department of Bacteria, Parasites and Fungi, Statens Serum Institut, Copenhagen, Denmark                                                                                                | Statens Serum Institut Bioinformatics and Microbial Genomics                                                                                                                                    | Danish Covid-19 Genome Consortium                                                                                                                                                                                                                                                                                                                                                                                                                                                                                                                                                                  |
| EPI_ISL_515082                                                                                                                                                                                                                                                                                                                                                                                                                                        | Department of Biochemistry, Cell and Molecular Biology                                                                                                                                  | WACCBIIP, University of Ghana                                                                                                                                                                   | A.K.; Adu, B.; Amenga-Etego; Ampofo, W.; Amuzu; Anang; Arjarquah, A.; Asante, I.; Awandare; Bediako, Y.; Boatema, L.; Bonney, E.; Bonney, K.; C.M.; D.S.; Eshun, M.; G.A.; G.B.; J.K.; J.M.; Kotey, E.; Kumordjie, S.; Kyei, L.N.; Magnussen, V.; Morang'a; Mutungi; Ngoi; Quashie, P.; Tei-Maya, F.                                                                                                                                                                                                                                                                                               |
| EPI_ISL_884839, EPI_ISL_884841, EPI_ISL_884856                                                                                                                                                                                                                                                                                                                                                                                                        | Department of Biochemistry, Cell and Molecular Biology, West African Centre for Cell Biology of Infectious Pathogens (WACCBIIP), University of Ghana                                    | Department of Biochemistry, Cell and Molecular Biology, West African Centre for Cell Biology of Infectious Pathogens (WACCBIIP), University of Ghana                                            | A.-K.; A.B.; Abass; Akoriyea; Amenga-Etego; Amoako, E.; Amuzu; Awandare; Bediako, Y.; Boakye, C.M.; D.S.; Diallo, G.A.; J.M.; Kibinge, N.; Kumi-Ansah, F.; L.N.; Magnussen, V.; Mohammed, A.; Morang'a; Ngoi, O.D.; Odoom, T.; Quashie, P.; S.K.; Tapela, K.; Tei-Maya, F.                                                                                                                                                                                                                                                                                                                         |
| EPI_ISL_421195, EPI_ISL_540509, EPI_ISL_678471, EPI_ISL_737311, EPI_ISL_1708595, EPI_ISL_1826581, EPI_ISL_1826750                                                                                                                                                                                                                                                                                                                                     | Department of Clinical Microbiology                                                                                                                                                     | GIGA Medical Genomics                                                                                                                                                                           | Axelle Chaslain; Bouchra Boujemla; Cécile Meex; Céline Fombellida-Lopez; Keith Durkin; Maria Artesi; Marie-Pierre Hayette; Nathalie Renotte; Pierrette Melin; Raphaël Boreux; Sébastien Bontems; Vincent Bours; Vincent Bours.                                                                                                                                                                                                                                                                                                                                                                     |





|                                                                                                                                                                                                                                                                                                                                                                                                                                                                                                                                                                                                                                                                                                                                                                                                                                                                                                                                                                                                                                                                                                                                                                                                                                                                                                                                                                                                                                                                                                                                                                                                                                                                                                                                                                                                                                                                                                                                                                                                                                                                                                                                                                                                                                                                                                                                                                                                                                                                                                                                                                                                                                                |                                                                                                                                             |                                                                                                                                                                                                                    |                                                                                                                                                                                                                                                                                                                                                                                                                                                                                                                                                    |
|------------------------------------------------------------------------------------------------------------------------------------------------------------------------------------------------------------------------------------------------------------------------------------------------------------------------------------------------------------------------------------------------------------------------------------------------------------------------------------------------------------------------------------------------------------------------------------------------------------------------------------------------------------------------------------------------------------------------------------------------------------------------------------------------------------------------------------------------------------------------------------------------------------------------------------------------------------------------------------------------------------------------------------------------------------------------------------------------------------------------------------------------------------------------------------------------------------------------------------------------------------------------------------------------------------------------------------------------------------------------------------------------------------------------------------------------------------------------------------------------------------------------------------------------------------------------------------------------------------------------------------------------------------------------------------------------------------------------------------------------------------------------------------------------------------------------------------------------------------------------------------------------------------------------------------------------------------------------------------------------------------------------------------------------------------------------------------------------------------------------------------------------------------------------------------------------------------------------------------------------------------------------------------------------------------------------------------------------------------------------------------------------------------------------------------------------------------------------------------------------------------------------------------------------------------------------------------------------------------------------------------------------|---------------------------------------------------------------------------------------------------------------------------------------------|--------------------------------------------------------------------------------------------------------------------------------------------------------------------------------------------------------------------|----------------------------------------------------------------------------------------------------------------------------------------------------------------------------------------------------------------------------------------------------------------------------------------------------------------------------------------------------------------------------------------------------------------------------------------------------------------------------------------------------------------------------------------------------|
| EPI_ISL_2896259                                                                                                                                                                                                                                                                                                                                                                                                                                                                                                                                                                                                                                                                                                                                                                                                                                                                                                                                                                                                                                                                                                                                                                                                                                                                                                                                                                                                                                                                                                                                                                                                                                                                                                                                                                                                                                                                                                                                                                                                                                                                                                                                                                                                                                                                                                                                                                                                                                                                                                                                                                                                                                | Helsinki and Helsinki University Hospital, Huslab Finland<br>Department of Virology, Molecular Biology and Genome Research                  | Helsinki, Helsinki, Finland<br>Department of Virology, Molecular Biology and Genome Research                                                                                                                       | Kurkela; Teemu Smura; fathiah Zakhram Kotaria, N.; Kotorashvili, A.; Murtshkvaladze, M.                                                                                                                                                                                                                                                                                                                                                                                                                                                            |
| EPI_ISL_855567, EPI_ISL_855570                                                                                                                                                                                                                                                                                                                                                                                                                                                                                                                                                                                                                                                                                                                                                                                                                                                                                                                                                                                                                                                                                                                                                                                                                                                                                                                                                                                                                                                                                                                                                                                                                                                                                                                                                                                                                                                                                                                                                                                                                                                                                                                                                                                                                                                                                                                                                                                                                                                                                                                                                                                                                 | Department of Virology, Principal Military Hospital of Instruction of Tunis                                                                 | Bundeswehr Institute of Microbiology                                                                                                                                                                               | Habiba Najja; Kilian Stoecker; Malena Bestehorn-Willmann; Markus H. Antwerpen; Mathias C. Walter; Roman Wölfel & Mohamed Ben Moussa; Simone Eckstein; Susann Handrick                                                                                                                                                                                                                                                                                                                                                                              |
| EPI_ISL_757286                                                                                                                                                                                                                                                                                                                                                                                                                                                                                                                                                                                                                                                                                                                                                                                                                                                                                                                                                                                                                                                                                                                                                                                                                                                                                                                                                                                                                                                                                                                                                                                                                                                                                                                                                                                                                                                                                                                                                                                                                                                                                                                                                                                                                                                                                                                                                                                                                                                                                                                                                                                                                                 | Department of Virology, Public Health Laboratories Division                                                                                 | Department of Virology, Public Health Laboratories Division                                                                                                                                                        | Aamer Ikram; Massab Umair; Muhammad Salman                                                                                                                                                                                                                                                                                                                                                                                                                                                                                                         |
| EPI_ISL_2254131                                                                                                                                                                                                                                                                                                                                                                                                                                                                                                                                                                                                                                                                                                                                                                                                                                                                                                                                                                                                                                                                                                                                                                                                                                                                                                                                                                                                                                                                                                                                                                                                                                                                                                                                                                                                                                                                                                                                                                                                                                                                                                                                                                                                                                                                                                                                                                                                                                                                                                                                                                                                                                | Department of Virology, School of Medicine, Shiraz University of Medical Sciences, Shiraz, Iran                                             | Genetics Research Center, University of Social Welfare and Rehabilitation Sciences                                                                                                                                 | Hosseini Najmabadi; Kimia Kahrizi; Marzieh Mohseni; Moattari A.; Moghadami M.; Zohreh Fattahi                                                                                                                                                                                                                                                                                                                                                                                                                                                      |
| EPI_ISL_926067, EPI_ISL_927136, EPI_ISL_928108, EPI_ISL_928152, EPI_ISL_930199, EPI_ISL_1022501, EPI_ISL_1022644, EPI_ISL_1022682, EPI_ISL_1022684, EPI_ISL_1065948, EPI_ISL_1125881, EPI_ISL_1126064, EPI_ISL_1126279, EPI_ISL_1858552, EPI_ISL_1859527, EPI_ISL_1859734, EPI_ISL_1860060, EPI_ISL_1860341, EPI_ISL_1862355, EPI_ISL_1862402, EPI_ISL_1862888, EPI_ISL_1863717, EPI_ISL_1864758, EPI_ISL_1865226, EPI_ISL_1865320, EPI_ISL_1866570, EPI_ISL_1868550, EPI_ISL_1868837, EPI_ISL_1869259, EPI_ISL_1871039, EPI_ISL_1871224, EPI_ISL_1871274, EPI_ISL_1871949, EPI_ISL_1872870, EPI_ISL_1874487, EPI_ISL_1873858, EPI_ISL_1875598, EPI_ISL_1875866, EPI_ISL_1876066, EPI_ISL_1876442, EPI_ISL_1876721, EPI_ISL_1877285, EPI_ISL_1877995, EPI_ISL_1878462, EPI_ISL_1879001, EPI_ISL_1881008, EPI_ISL_1881989, EPI_ISL_1882010, EPI_ISL_1882472, EPI_ISL_1882982, EPI_ISL_1883563, EPI_ISL_1883815, EPI_ISL_1884113, EPI_ISL_1886538, EPI_ISL_1887618, EPI_ISL_1888054, EPI_ISL_1888124, EPI_ISL_1890115, EPI_ISL_1891575, EPI_ISL_1891764, EPI_ISL_1893809, EPI_ISL_1894309, EPI_ISL_1895070, EPI_ISL_1896329, EPI_ISL_2023813, EPI_ISL_2025423, EPI_ISL_2028832, EPI_ISL_2175777, EPI_ISL_2176487, EPI_ISL_2300915                                                                                                                                                                                                                                                                                                                                                                                                                                                                                                                                                                                                                                                                                                                                                                                                                                                                                                                                                                                                                                                                                                                                                                                                                                                                                                                                                                                                                |                                                                                                                                             |                                                                                                                                                                                                                    |                                                                                                                                                                                                                                                                                                                                                                                                                                                                                                                                                    |
| see above                                                                                                                                                                                                                                                                                                                                                                                                                                                                                                                                                                                                                                                                                                                                                                                                                                                                                                                                                                                                                                                                                                                                                                                                                                                                                                                                                                                                                                                                                                                                                                                                                                                                                                                                                                                                                                                                                                                                                                                                                                                                                                                                                                                                                                                                                                                                                                                                                                                                                                                                                                                                                                      | Department of Virus and Microbiological Special Diagnostics, Statens Serum Institut, Copenhagen, Denmark                                    | Aalborg University                                                                                                                                                                                                 | Danish Covid-19 Genome Consortium                                                                                                                                                                                                                                                                                                                                                                                                                                                                                                                  |
| EPI_ISL_669126, EPI_ISL_669629, EPI_ISL_670863, EPI_ISL_757623, EPI_ISL_792954                                                                                                                                                                                                                                                                                                                                                                                                                                                                                                                                                                                                                                                                                                                                                                                                                                                                                                                                                                                                                                                                                                                                                                                                                                                                                                                                                                                                                                                                                                                                                                                                                                                                                                                                                                                                                                                                                                                                                                                                                                                                                                                                                                                                                                                                                                                                                                                                                                                                                                                                                                 | Department of Virus and Microbiological Special Diagnostics, Statens Serum Institut, Copenhagen, Denmark                                    | Albertsen Lab, Department of Chemistry and Bioscience, Aalborg University, Denmark                                                                                                                                 | Danish Covid-19 Genome Consortium                                                                                                                                                                                                                                                                                                                                                                                                                                                                                                                  |
| EPI_ISL_437631                                                                                                                                                                                                                                                                                                                                                                                                                                                                                                                                                                                                                                                                                                                                                                                                                                                                                                                                                                                                                                                                                                                                                                                                                                                                                                                                                                                                                                                                                                                                                                                                                                                                                                                                                                                                                                                                                                                                                                                                                                                                                                                                                                                                                                                                                                                                                                                                                                                                                                                                                                                                                                 | Department of Virus and Microbiological Special Diagnostics, Statens Serum Institut, Copenhagen, Denmark, Artillerivej 5, 2300 Copenhagen S | Albertsen lab, Department of Chemistry and Bioscience, Aalborg University, Denmark                                                                                                                                 | Rasmus Kirkegaard                                                                                                                                                                                                                                                                                                                                                                                                                                                                                                                                  |
| EPI_ISL_614409, EPI_ISL_616443, EPI_ISL_616724, EPI_ISL_617431, EPI_ISL_618152                                                                                                                                                                                                                                                                                                                                                                                                                                                                                                                                                                                                                                                                                                                                                                                                                                                                                                                                                                                                                                                                                                                                                                                                                                                                                                                                                                                                                                                                                                                                                                                                                                                                                                                                                                                                                                                                                                                                                                                                                                                                                                                                                                                                                                                                                                                                                                                                                                                                                                                                                                 |                                                                                                                                             | EPI_ISL_618309, EPI_ISL_618562, EPI_ISL_619869, EPI_ISL_620017, EPI_ISL_621663                                                                                                                                     |                                                                                                                                                                                                                                                                                                                                                                                                                                                                                                                                                    |
| see above                                                                                                                                                                                                                                                                                                                                                                                                                                                                                                                                                                                                                                                                                                                                                                                                                                                                                                                                                                                                                                                                                                                                                                                                                                                                                                                                                                                                                                                                                                                                                                                                                                                                                                                                                                                                                                                                                                                                                                                                                                                                                                                                                                                                                                                                                                                                                                                                                                                                                                                                                                                                                                      | Department of Virus and Microbiological Special Diagnostics, Statens Serum Institut, Denmark                                                | Albertsen lab, Department of Chemistry and Bioscience, Aalborg University, Denmark                                                                                                                                 | Danish Covid-19 Genome Consortia                                                                                                                                                                                                                                                                                                                                                                                                                                                                                                                   |
| EPI_ISL_1919404, EPI_ISL_2400054, EPI_ISL_2491413                                                                                                                                                                                                                                                                                                                                                                                                                                                                                                                                                                                                                                                                                                                                                                                                                                                                                                                                                                                                                                                                                                                                                                                                                                                                                                                                                                                                                                                                                                                                                                                                                                                                                                                                                                                                                                                                                                                                                                                                                                                                                                                                                                                                                                                                                                                                                                                                                                                                                                                                                                                              | Dept. of Medical Microbiology, Stavanger University Hospital, Helse Stavanger HF                                                            | Norwegian Institute of Public Health, Department of Virology                                                                                                                                                       | Atiya R Ali; Debech Nadia; Engebretsen Serina Beate; Garcia Llorente Ignacio; Hilde Elshaug; Hilde Volian; Jon Bråte; Kamilla Heddeland Instefjord; Karoline Bragstad; Kathrine Stene-Johansen; Line Victoria Moen; Marie Paulsen Madsen; Olav Hungnes; Pedersen Benedikte Nevjen; Rasmus Riis Kopperud                                                                                                                                                                                                                                            |
| EPI_ISL_1118120, EPI_ISL_1118121                                                                                                                                                                                                                                                                                                                                                                                                                                                                                                                                                                                                                                                                                                                                                                                                                                                                                                                                                                                                                                                                                                                                                                                                                                                                                                                                                                                                                                                                                                                                                                                                                                                                                                                                                                                                                                                                                                                                                                                                                                                                                                                                                                                                                                                                                                                                                                                                                                                                                                                                                                                                               | Dept. of Microbiology and Infection Control, Akershus University Hospital HF                                                                | Dept. of Microbiology and Infection Control, Akershus University Hospital HF                                                                                                                                       | Alexander Hesselberg Lovestad; Hege Vangstein Aamot                                                                                                                                                                                                                                                                                                                                                                                                                                                                                                |
| EPI_ISL_410532                                                                                                                                                                                                                                                                                                                                                                                                                                                                                                                                                                                                                                                                                                                                                                                                                                                                                                                                                                                                                                                                                                                                                                                                                                                                                                                                                                                                                                                                                                                                                                                                                                                                                                                                                                                                                                                                                                                                                                                                                                                                                                                                                                                                                                                                                                                                                                                                                                                                                                                                                                                                                                 | Dept. of Pathology, National Institute of Infectious Diseases                                                                               | Pathogen Genomics Center, National Institute of Infectious Diseases                                                                                                                                                | Harutaka Katano; Hideki Hasegawa; Kazuya Shirato; Makoto Kuroda; Makoto Takeda; Motoi Suzuki; Naganori Nao; Shutoku Matsuyama; Tadaki Suzuki; Takaji Wakita; Tsuyoshi Sekizuka                                                                                                                                                                                                                                                                                                                                                                     |
| EPI_ISL_774872                                                                                                                                                                                                                                                                                                                                                                                                                                                                                                                                                                                                                                                                                                                                                                                                                                                                                                                                                                                                                                                                                                                                                                                                                                                                                                                                                                                                                                                                                                                                                                                                                                                                                                                                                                                                                                                                                                                                                                                                                                                                                                                                                                                                                                                                                                                                                                                                                                                                                                                                                                                                                                 | Designated Reference Institute for Chemical Measurements (DRICM)                                                                            | DNA SOLUTION LTD.                                                                                                                                                                                                  | Abdul Khaleque; Abu Sufian; Hasan Ul Haider; Jannatun Naima; Kazi Nadim Hasan; MSM Chowdhury; Mala Khan; Mamudul Hasan Razu; Md. Imran Khan; Mizanur Rahman; Mohammad Fazle Alam Rabbi                                                                                                                                                                                                                                                                                                                                                             |
| EPI_ISL_2171041, EPI_ISL_2171267                                                                                                                                                                                                                                                                                                                                                                                                                                                                                                                                                                                                                                                                                                                                                                                                                                                                                                                                                                                                                                                                                                                                                                                                                                                                                                                                                                                                                                                                                                                                                                                                                                                                                                                                                                                                                                                                                                                                                                                                                                                                                                                                                                                                                                                                                                                                                                                                                                                                                                                                                                                                               | Dhulikhel Hospital, Kathmandu University Hospital                                                                                           | Molecular and Genomics Research Lab, Dhulikhel Hospital, Kathmandu University Hospital                                                                                                                             | Dipesh Tamrakar; Manu Vanerschoot; Meghnath Dhimal; Navin Adhikari; Nishan Katwal; Pradip Gyanwali; Rajeev Shrestha; Saroj Bhattarai; Surendra Kumar Madhup                                                                                                                                                                                                                                                                                                                                                                                        |
| EPI_ISL_2101016, EPI_ISL_2101017                                                                                                                                                                                                                                                                                                                                                                                                                                                                                                                                                                                                                                                                                                                                                                                                                                                                                                                                                                                                                                                                                                                                                                                                                                                                                                                                                                                                                                                                                                                                                                                                                                                                                                                                                                                                                                                                                                                                                                                                                                                                                                                                                                                                                                                                                                                                                                                                                                                                                                                                                                                                               | Diagnostic Laboratory-Microbiology                                                                                                          | Biomedical Laboratory-2                                                                                                                                                                                            | ; A. Dharshan De Silva; Dilini Nakawita; Dilini Nakkawita; Dumitha Govindapala; Harshi Abeygonawardena; Himali S. Jayasinghearachchi; Pawani Gamage; Priyamali Jayasekera; Thamarasi Senaratne; Upeksha Kulasekera                                                                                                                                                                                                                                                                                                                                 |
| EPI_ISL_1447336, EPI_ISL_1533051, EPI_ISL_1533073                                                                                                                                                                                                                                                                                                                                                                                                                                                                                                                                                                                                                                                                                                                                                                                                                                                                                                                                                                                                                                                                                                                                                                                                                                                                                                                                                                                                                                                                                                                                                                                                                                                                                                                                                                                                                                                                                                                                                                                                                                                                                                                                                                                                                                                                                                                                                                                                                                                                                                                                                                                              | Diagnostic and Research Center of Infectious Diseases, Medical Faculty, Andalas University                                                  | Diagnostic and Research Center of Infectious Diseases, Medical Faculty, Andalas University                                                                                                                         | Andani Eka Putra; Ayu Novita Trisnawati; Dede Rahman Agustian; Desmawati; Dessy Arisanty; Fauzul Azhim; Gestina Aliska; Ikhwan R. Sudji; Jeanne Plantika Menra; Linosefa; Mutia Lailani; Nia Ayuni Putri; Nita Afriani; SM Rezvi; Sekar Asri Tresnaningtyas; Siskalil Fahma; Syafriyazanti; Syandrez Prima Putu; Yolani Syaputri                                                                                                                                                                                                                   |
| EPI_ISL_2636693, EPI_ISL_2762335, EPI_ISL_2762339, EPI_ISL_2957236, EPI_ISL_2957275                                                                                                                                                                                                                                                                                                                                                                                                                                                                                                                                                                                                                                                                                                                                                                                                                                                                                                                                                                                                                                                                                                                                                                                                                                                                                                                                                                                                                                                                                                                                                                                                                                                                                                                                                                                                                                                                                                                                                                                                                                                                                                                                                                                                                                                                                                                                                                                                                                                                                                                                                            | Diagnosticum - Labor Neukirchen                                                                                                             | Robert Koch Institute                                                                                                                                                                                              |                                                                                                                                                                                                                                                                                                                                                                                                                                                                                                                                                    |
| EPI_ISL_2657185                                                                                                                                                                                                                                                                                                                                                                                                                                                                                                                                                                                                                                                                                                                                                                                                                                                                                                                                                                                                                                                                                                                                                                                                                                                                                                                                                                                                                                                                                                                                                                                                                                                                                                                                                                                                                                                                                                                                                                                                                                                                                                                                                                                                                                                                                                                                                                                                                                                                                                                                                                                                                                | Diagnostyka                                                                                                                                 | 1. Tricity SARS-CoV-2 sequencing consortium: University of Gdansk, Medical University of Gdansk, Vaxican Ltd., Invicta Ltd. 2. National Institute of Public Health - National Institute of Hygiene, Warsaw, Poland | Celina Cybulska; Karolina Gackowska; Katarzyna Groth; Katarzyna Zacharczuk; Krystyna Bienkowska Szewczyk; Lukasz Rabalski; Maciej Grzybek; Maciej Kosinski; Magdalena Nowakowska; Marcin Lubocki; Małgorzata Sadkowska-Todys; Tomasz Wolkowicz                                                                                                                                                                                                                                                                                                     |
| EPI_ISL_2319055, EPI_ISL_2937950, EPI_ISL_2937967, EPI_ISL_3133633                                                                                                                                                                                                                                                                                                                                                                                                                                                                                                                                                                                                                                                                                                                                                                                                                                                                                                                                                                                                                                                                                                                                                                                                                                                                                                                                                                                                                                                                                                                                                                                                                                                                                                                                                                                                                                                                                                                                                                                                                                                                                                                                                                                                                                                                                                                                                                                                                                                                                                                                                                             | Diagnostyka. Laboratoria Medyczne.                                                                                                          | 1. ViroGenetics - BS13 Laboratory of Virology, Malopolska Centre of Biotechnology, Jagiellonian University; 2. genXone SA, Research & Development Laboratory                                                       | Aleksandra Gidlewicz; Anna Brylak; Brylak A; Drwaska-Matelska N; Gidlewicz A; Grabowski J; Gromowski, T.; Grzegorz Nowicki; Jakub Grabowski; Januszczak S; Karol Szeszko; Kaszuba M; Kowalski, M.; Krych L; Labaj; Maciej Sykulski; Mazur-Panasiuk, N.; Michal Kaszuba; Natalia Drwaska-Matelska, Nowicki G; P., Pyrc, K.; Sykulski M; Sylwia Januszczak; Szeszko K; Szulc, P.; Wydmanski W.; Wydmanski, W.; Lukasz Krych                                                                                                                          |
| EPI_ISL_1752833                                                                                                                                                                                                                                                                                                                                                                                                                                                                                                                                                                                                                                                                                                                                                                                                                                                                                                                                                                                                                                                                                                                                                                                                                                                                                                                                                                                                                                                                                                                                                                                                                                                                                                                                                                                                                                                                                                                                                                                                                                                                                                                                                                                                                                                                                                                                                                                                                                                                                                                                                                                                                                | Diagnostyka. Laboratoria Medyczne.                                                                                                          | 1. ViroGenetics - BS13 Laboratory of Virology, Malopolska Centre of Biotechnology, Jagiellonian University; 2. genXone SA, Research & Development Laboratory                                                       | Brylak A; Drwaska-Matelska N; Gidlewicz A; Grabowski J; Gromowski, T.; Januszczak S; Kaszuba M; Kowalski, M.; Krych L; Labaj; Mazur-Panasiuk, N.; Nowicki G; P.P.; Pyrc, K.; Sykulski M; Szeszko K; Szulc, P.; Wydmanski W.                                                                                                                                                                                                                                                                                                                        |
| EPI_ISL_2597974, EPI_ISL_1855939                                                                                                                                                                                                                                                                                                                                                                                                                                                                                                                                                                                                                                                                                                                                                                                                                                                                                                                                                                                                                                                                                                                                                                                                                                                                                                                                                                                                                                                                                                                                                                                                                                                                                                                                                                                                                                                                                                                                                                                                                                                                                                                                                                                                                                                                                                                                                                                                                                                                                                                                                                                                               | Dianalabs SA<br>Dinas Kesehatan Kota Bogor                                                                                                  | Genesupport<br>Indonesian Research Center for Veterinary Science / Bbalitvet                                                                                                                                       | Geraldine Jost; Katia Jatou; Nadia Liasine; Tanguy ARAUD<br>Diana Nurjanah; Fadry Djufry; Harimurti Nuradi; Ilham Chaidir; Ni Luh Putu Indri Dharmayanti; Risa Indriani; Sri Nowo Retno                                                                                                                                                                                                                                                                                                                                                            |
| EPI_ISL_747337, EPI_ISL_747419, EPI_ISL_760064, EPI_ISL_1063655, EPI_ISL_1063656, EPI_ISL_2161069, EPI_ISL_2161113, EPI_ISL_2161137, EPI_ISL_2332342, EPI_ISL_2361092, EPI_ISL_2361095, EPI_ISL_2361097, EPI_ISL_2464346, EPI_ISL_2464347, EPI_ISL_2710485, EPI_ISL_2710499, EPI_ISL_2754407, EPI_ISL_2754419, EPI_ISL_2754619, EPI_ISL_2967308, EPI_ISL_2967332, EPI_ISL_2967375, EPI_ISL_2967572, EPI_ISL_3026379, EPI_ISL_3026450, EPI_ISL_3026451, EPI_ISL_3026459, EPI_ISL_3026473, EPI_ISL_3026476, EPI_ISL_3026508, EPI_ISL_3026560, EPI_ISL_3026673, EPI_ISL_3026704, EPI_ISL_3026742, EPI_ISL_3026834                                                                                                                                                                                                                                                                                                                                                                                                                                                                                                                                                                                                                                                                                                                                                                                                                                                                                                                                                                                                                                                                                                                                                                                                                                                                                                                                                                                                                                                                                                                                                                                                                                                                                                                                                                                                                                                                                                                                                                                                                                 |                                                                                                                                             | Ae Kyung Park; Chae Young Lee; Chaeyoung Lee; Eun-Jin Kim; Heui Man Kim; Il-Hwan Kim; Jeong-Ah Kim; Jeong-Min Kim; Jin Sun No; Namjoong Lee; Sang Hee Woo                                                          |                                                                                                                                                                                                                                                                                                                                                                                                                                                                                                                                                    |
| see above                                                                                                                                                                                                                                                                                                                                                                                                                                                                                                                                                                                                                                                                                                                                                                                                                                                                                                                                                                                                                                                                                                                                                                                                                                                                                                                                                                                                                                                                                                                                                                                                                                                                                                                                                                                                                                                                                                                                                                                                                                                                                                                                                                                                                                                                                                                                                                                                                                                                                                                                                                                                                                      | Division of Emerging Infectious Diseases, Bureau of Infectious Diseases Diagnosis Control, Korea Disease Control and Prevention Agency      | Division of Emerging Infectious Diseases, Bureau of Infectious Diseases Diagnosis Control, Korea Disease Control and Prevention Agency                                                                             |                                                                                                                                                                                                                                                                                                                                                                                                                                                                                                                                                    |
| EPI_ISL_2695860, EPI_ISL_2695862, EPI_ISL_2695874, EPI_ISL_2876313, EPI_ISL_2876320, EPI_ISL_2876336, EPI_ISL_2876382, EPI_ISL_3032493, EPI_ISL_3032496, EPI_ISL_3032506, EPI_ISL_3032513, EPI_ISL_3032515, EPI_ISL_3032516                                                                                                                                                                                                                                                                                                                                                                                                                                                                                                                                                                                                                                                                                                                                                                                                                                                                                                                                                                                                                                                                                                                                                                                                                                                                                                                                                                                                                                                                                                                                                                                                                                                                                                                                                                                                                                                                                                                                                                                                                                                                                                                                                                                                                                                                                                                                                                                                                    | Division of Medical Virology, National Health Laboratory Service (NHLS), Tygerberg Hospital / Stellenbosch University                       | Division of Medical Virology, National Health Laboratory Service (NHLS), Tygerberg Hospital / Stellenbosch University                                                                                              | Bronwyn Kleinhaus; Gert van Zyl; Kamela Mahlakwane; San Emmanuel James; Susan Engelbrecht; Tania Stander; Tongai Maponga; Tulio de Oliveira; Wolfgang Preiser                                                                                                                                                                                                                                                                                                                                                                                      |
| EPI_ISL_1591415, EPI_ISL_1591427                                                                                                                                                                                                                                                                                                                                                                                                                                                                                                                                                                                                                                                                                                                                                                                                                                                                                                                                                                                                                                                                                                                                                                                                                                                                                                                                                                                                                                                                                                                                                                                                                                                                                                                                                                                                                                                                                                                                                                                                                                                                                                                                                                                                                                                                                                                                                                                                                                                                                                                                                                                                               | Division of Medical Virology, National Health Laboratory Service (NHLS), Tygerberg Hospital / Stellenbosch University                       | Division of Medical Virology, Stellenbosch University and NHLS Tygerberg Hospital                                                                                                                                  | Bronwyn Kleinhaus; Gert van Zyl; Susan Engelbrecht; Wolfgang Preiser                                                                                                                                                                                                                                                                                                                                                                                                                                                                               |
| EPI_ISL_412869, EPI_ISL_426173, EPI_ISL_497962, EPI_ISL_506987, EPI_ISL_510627                                                                                                                                                                                                                                                                                                                                                                                                                                                                                                                                                                                                                                                                                                                                                                                                                                                                                                                                                                                                                                                                                                                                                                                                                                                                                                                                                                                                                                                                                                                                                                                                                                                                                                                                                                                                                                                                                                                                                                                                                                                                                                                                                                                                                                                                                                                                                                                                                                                                                                                                                                 | Division of Viral Diseases, Center for Laboratory Control of Infectious Diseases, Korea Centers for Diseases Control and Prevention         | Division of Viral Diseases, Center for Laboratory Control of Infectious Diseases, Korea Centers for Diseases Control and Prevention                                                                                | Daesang Lee; Dong Hyun Song; Heui Man Kim; Hye-Jun Jo; Jeong-Min Kim; Jun-Sub Kim; Junhyeong Jang; Mi-Seon Kim; Myung Guk Han; Namjoong Lee; Sang Hee Woo; Sehee Park; Seong Tae Jeong; Yoon-Seok Chung                                                                                                                                                                                                                                                                                                                                            |
| EPI_ISL_2521795, EPI_ISL_1055411                                                                                                                                                                                                                                                                                                                                                                                                                                                                                                                                                                                                                                                                                                                                                                                                                                                                                                                                                                                                                                                                                                                                                                                                                                                                                                                                                                                                                                                                                                                                                                                                                                                                                                                                                                                                                                                                                                                                                                                                                                                                                                                                                                                                                                                                                                                                                                                                                                                                                                                                                                                                               | Dr S rajju, Director of public health and preventive medicine<br>Dr. Leonard A. Miller Centre for Health Services                           | inStem NCBS - INSACOG<br>National Microbiology Laboratory (NML)                                                                                                                                                    | Uma Ramakrishnan Dasaradhi Palakodeti Aswin SaiNarain<br>Adel Malek; Anna Majer; Anneliese Landgraf; CanCOGEN's metadata curation team; Darian Hole; Elsie Grudeki; Gary Van Domselaar; George Zahariadis; Grace Seo; Jennifer Tanner; Kerr Smith; Kirsten Biggar; Laura Gilbert; Madison Chapel; Morag Graham; Natalie Knox; Nathalie Bastien; Philip Mabon; Public Health Agency of Canada CanCOGen team; Rhiannon Huzarewicz; Robert Needle; Russell Mandes; Shari Tyson; Timothy Booth; Yan Li; Yang Yu                                        |
| EPI_ISL_461385, EPI_ISL_632354, EPI_ISL_801407, EPI_ISL_2483471, EPI_ISL_2860624                                                                                                                                                                                                                                                                                                                                                                                                                                                                                                                                                                                                                                                                                                                                                                                                                                                                                                                                                                                                                                                                                                                                                                                                                                                                                                                                                                                                                                                                                                                                                                                                                                                                                                                                                                                                                                                                                                                                                                                                                                                                                                                                                                                                                                                                                                                                                                                                                                                                                                                                                               | Dutch COVID-19 response team                                                                                                                | Erasmus Medical Center                                                                                                                                                                                             | Anne van der Linden; Anmekiek van der Eijk; Aura Timen; Bas Oude Munnink; Claudia Schapendonk; Corien Swaan; Corine GeurtsvanKessel; David Nieuwenhuis; Emmanuelle Munger; Irina Chestakova; Jeroen van Kampen; Jolanda Voermans; Madelief Mollers; Manon Haverkate; Marion Koopmans; Marjan Boter; Mark Pronk; Mart Stein; Pascal Lemmond; Reina Sikkema; Richard Molenaar; Sandra Kieungma Momba; Stefan van Nieuwkoop; Theo Bestebroer; on behalf of the Dutch national COVID-19 respo; on behalf of the Dutch national COVID-19 response team. |
| EPI_ISL_547447, EPI_ISL_547449, EPI_ISL_547451, EPI_ISL_636492, EPI_ISL_636519, EPI_ISL_824273, EPI_ISL_1014558, EPI_ISL_1014573, EPI_ISL_1014646, EPI_ISL_1035245, EPI_ISL_1232248, EPI_ISL_1232305, EPI_ISL_1232360, EPI_ISL_1288137, EPI_ISL_1371227, EPI_ISL_1457590, EPI_ISL_1521321, EPI_ISL_1521326, EPI_ISL_1522167, EPI_ISL_1522202, EPI_ISL_1522223, EPI_ISL_1596268, EPI_ISL_1597320, EPI_ISL_1597411, EPI_ISL_1702535, EPI_ISL_1704912, EPI_ISL_1704914, EPI_ISL_1704921, EPI_ISL_1704945, EPI_ISL_1704959, EPI_ISL_1704990, EPI_ISL_1705155, EPI_ISL_1705178, EPI_ISL_1705242, EPI_ISL_1705251, EPI_ISL_1705293, EPI_ISL_1705301, EPI_ISL_1705568, EPI_ISL_1705864, EPI_ISL_1705904, EPI_ISL_1705929, EPI_ISL_1792360, EPI_ISL_1792363, EPI_ISL_1792862, EPI_ISL_1792863, EPI_ISL_1792864, EPI_ISL_1792865, EPI_ISL_1792866, EPI_ISL_1961869, EPI_ISL_1961897, EPI_ISL_1961912, EPI_ISL_1961920, EPI_ISL_1962066, EPI_ISL_1962160, EPI_ISL_1962166, EPI_ISL_1962181, EPI_ISL_1962172, EPI_ISL_1962490, EPI_ISL_1962494, EPI_ISL_1962971, EPI_ISL_2039518, EPI_ISL_2093534, EPI_ISL_2093545, EPI_ISL_2093608, EPI_ISL_2093608, EPI_ISL_2093759, EPI_ISL_2093858, EPI_ISL_2094043, EPI_ISL_2094396, EPI_ISL_2094396, EPI_ISL_2218631, EPI_ISL_2218631, EPI_ISL_2219699, EPI_ISL_2220430, EPI_ISL_2220436, EPI_ISL_2220523, EPI_ISL_2220549, EPI_ISL_2302309, EPI_ISL_2302360, EPI_ISL_2302965, EPI_ISL_2302971, EPI_ISL_2303552, EPI_ISL_2303931, EPI_ISL_2303978, EPI_ISL_2405457, EPI_ISL_2405458, EPI_ISL_2405505, EPI_ISL_2405516, EPI_ISL_2405518, EPI_ISL_2405526, EPI_ISL_2405538, EPI_ISL_2405550, EPI_ISL_2405561, EPI_ISL_2405570, EPI_ISL_2405573, EPI_ISL_2405584, EPI_ISL_2405585, EPI_ISL_2405594, EPI_ISL_2405596, EPI_ISL_2405597, EPI_ISL_2405608, EPI_ISL_2405609, EPI_ISL_2405620, EPI_ISL_2406008, EPI_ISL_2406319, EPI_ISL_2406352, EPI_ISL_2474249, EPI_ISL_2475174, EPI_ISL_2475191, EPI_ISL_2475163, EPI_ISL_2475518, EPI_ISL_2475682, EPI_ISL_2476172, EPI_ISL_2476276, EPI_ISL_2476312, EPI_ISL_2476313, EPI_ISL_2476316, EPI_ISL_2476116, EPI_ISL_2610234, EPI_ISL_2610234, EPI_ISL_2610471, EPI_ISL_2610546, EPI_ISL_2610658, EPI_ISL_2610674, EPI_ISL_2610690, EPI_ISL_2610721, EPI_ISL_2610775, EPI_ISL_2672255, EPI_ISL_2672409, EPI_ISL_2672546, EPI_ISL_2673234, EPI_ISL_2673239, EPI_ISL_2673240, EPI_ISL_2673274, EPI_ISL_2673295, EPI_ISL_2678916, EPI_ISL_2678926, EPI_ISL_2788186, EPI_ISL_2788368, EPI_ISL_2862759, EPI_ISL_2862935, EPI_ISL_2862937, EPI_ISL_2862941, EPI_ISL_2981152, EPI_ISL_2981385, EPI_ISL_2981482, EPI_ISL_2981711, EPI_ISL_2981868, EPI_ISL_2981896, EPI_ISL_2981901 |                                                                                                                                             |                                                                                                                                                                                                                    |                                                                                                                                                                                                                                                                                                                                                                                                                                                                                                                                                    |
| see above                                                                                                                                                                                                                                                                                                                                                                                                                                                                                                                                                                                                                                                                                                                                                                                                                                                                                                                                                                                                                                                                                                                                                                                                                                                                                                                                                                                                                                                                                                                                                                                                                                                                                                                                                                                                                                                                                                                                                                                                                                                                                                                                                                                                                                                                                                                                                                                                                                                                                                                                                                                                                                      | Dutch COVID-19 response team                                                                                                                | National Institute for Public Health and the Environment (RIVM)                                                                                                                                                    | Adam Meijer; AnneMarie van den Brandt; Annelies Kroneman; Bas van der Veer; Chantal Reusken; Dennis Schmitz; Dirk Egink; Eunice Thon; Florian Zwagemaker; Harry Venema; James Groot; Jeroen Cremer; Jolienke Hardeman; Karim Hajji; Kim Freniks; Linda van de Nes; Lisa Wijisman; Lynn Aarts; Melissa van Tuil; Robert Kohl; Rianne Jaarsma; Sanne Bos; Sharon van den Brink; Sjoerd Kulling; on behalf of the national COVID-19 response team                                                                                                     |
| EPI_ISL_2140728, EPI_ISL_2246957                                                                                                                                                                                                                                                                                                                                                                                                                                                                                                                                                                                                                                                                                                                                                                                                                                                                                                                                                                                                                                                                                                                                                                                                                                                                                                                                                                                                                                                                                                                                                                                                                                                                                                                                                                                                                                                                                                                                                                                                                                                                                                                                                                                                                                                                                                                                                                                                                                                                                                                                                                                                               | Dysselddorp Clinic wc DDC<br>Dział Diagnostyki Laboratoryjnej Wojewódzki Szpital                                                            | NHLS/UJCT<br>1. Academic Center for Pathomorphological and Genetic                                                                                                                                                 | Arash Iranzadeh; Bruna Galvao; Carolyn Williamson; Deelan Doolabh; Diana Hardie; Innocent Mudau; Kruger Marais; Lynn Tyers; Marvin Hsiao; Stephen Korsman<br>Anetta Sulewska; Jacek Nikliński; Janusz Dziecioł; Joanna Kisłuk; Katarzyna Zacharczuk; Konrad Raczkowski; Magdalena Nowakowska; Małgorzata Sadkowska-Todys; Piotr Karabowicz; Piotr Majewski; Przemysław Bielec; Joanna Reszcę; Radosław Charkiewicz;                                                                                                                                |

| Specjalistyczny im.J.Gromkowskiego                                                                                                                                                                                                                                                                                                                                                                                                                                                                                                                                                                                                                                                                                                                                                                                                                                                                                                                                                                                                                                                                                                                                                              |                                                                                                                                                                          | Molecular Diagnostics Ltd, Białystok, Poland 2. National Institute of Public Health - National Institute of Hygiene, Warsaw, Poland  | Tomasz Wolkowicz                                                                                                                                                                                                                                                                                                                                                                                                                                                                                                                                                                                                                                                                                                                                                                  |
|-------------------------------------------------------------------------------------------------------------------------------------------------------------------------------------------------------------------------------------------------------------------------------------------------------------------------------------------------------------------------------------------------------------------------------------------------------------------------------------------------------------------------------------------------------------------------------------------------------------------------------------------------------------------------------------------------------------------------------------------------------------------------------------------------------------------------------------------------------------------------------------------------------------------------------------------------------------------------------------------------------------------------------------------------------------------------------------------------------------------------------------------------------------------------------------------------|--------------------------------------------------------------------------------------------------------------------------------------------------------------------------|--------------------------------------------------------------------------------------------------------------------------------------|-----------------------------------------------------------------------------------------------------------------------------------------------------------------------------------------------------------------------------------------------------------------------------------------------------------------------------------------------------------------------------------------------------------------------------------------------------------------------------------------------------------------------------------------------------------------------------------------------------------------------------------------------------------------------------------------------------------------------------------------------------------------------------------|
| EPI_ISL_421656                                                                                                                                                                                                                                                                                                                                                                                                                                                                                                                                                                                                                                                                                                                                                                                                                                                                                                                                                                                                                                                                                                                                                                                  | E. Gulbja Laboratorija                                                                                                                                                   | Latvian Biomedical Research and Study Centre                                                                                         | Dmitrijs Perminovs; Ivars Silamikelis; Jānis Kloviņš; Kaspars Megnis; Mikus Gavars; Monta Ustinova; Uga Dumpis; Vita Rovite; Nikita Zrelovs                                                                                                                                                                                                                                                                                                                                                                                                                                                                                                                                                                                                                                       |
| EPI_ISL_1312417, EPI_ISL_1312435, EPI_ISL_1312683, EPI_ISL_1312689, EPI_ISL_1321930                                                                                                                                                                                                                                                                                                                                                                                                                                                                                                                                                                                                                                                                                                                                                                                                                                                                                                                                                                                                                                                                                                             | E. Gulbja laboratorija                                                                                                                                                   | Latvian Biomedical Research and Study Centre                                                                                         | Davids Fridmanis; Dmitrijs Perminovs; Elina Dimina; Guntars Zarins; Ivars Silamikelis; Janis Klovinis; Janis Pjalkovskis; Juris Perevoscikovs; Kaspars Megnis; Laila Silamikele; Lauma Freimane; Laura Ansons; Uga Dumpis; Una Krumina; Vita Rovite                                                                                                                                                                                                                                                                                                                                                                                                                                                                                                                               |
| EPI_ISL_1582980                                                                                                                                                                                                                                                                                                                                                                                                                                                                                                                                                                                                                                                                                                                                                                                                                                                                                                                                                                                                                                                                                                                                                                                 | E.S.E. HOSPITAL SAN JOSE DE MAICAO                                                                                                                                       | Instituto Nacional de Salud- Dirección de Investigación en Salud Pública                                                             | Carlos Franco-Muñoz; Carmen Osorio; Diana Malo; Diego A. Álvarez-Díaz; Diego Andrés Prada; Gerardo Santamaría; Hector Alejandro Ruiz-Moreno; Jhonattan Reales-González; Juan Camilo Martínez; Julian Naizaque; Katherine Laiton-Donato; Lisseth Pardo; Magdalena Wiesner; Marcela Mercado-Reyes; Maria T. Herrera-Sepúlveda; Marta Lopez Blanco; Martha Lucia Ospina Martínez; Paola Rojas; Sergio Gomez; Sheryll Corchuelo; Ángela Alarcon Cruz                                                                                                                                                                                                                                                                                                                                  |
| EPI_ISL_1915793, EPI_ISL_1972358                                                                                                                                                                                                                                                                                                                                                                                                                                                                                                                                                                                                                                                                                                                                                                                                                                                                                                                                                                                                                                                                                                                                                                | EHA Clinics                                                                                                                                                              | National Reference Laboratory, Nigeria Centre for Disease Control                                                                    | Anthony Ahumibe; Catherine Okoi; Chimaobi Chukwu; Dr Chikwe Ihekweazu; Dr Ndodo Nnaemeka; Dr Omoare Adesuyi; Grace Esebanmen; Nwando Mba; Olusola Anuoluwapo Akanbi                                                                                                                                                                                                                                                                                                                                                                                                                                                                                                                                                                                                               |
| EPI_ISL_2987317, EPI_ISL_2987318, EPI_ISL_2987335                                                                                                                                                                                                                                                                                                                                                                                                                                                                                                                                                                                                                                                                                                                                                                                                                                                                                                                                                                                                                                                                                                                                               | ERMELO LABORATORY                                                                                                                                                        | National Institute for Communicable Diseases of the National Health Laboratory Service                                               | Amoako DG; Bhiman JN; Everatt J; Ismail A; Mahlangu B; Mnguni A; Mohale T; Ntuli N; Scheepers C                                                                                                                                                                                                                                                                                                                                                                                                                                                                                                                                                                                                                                                                                   |
| EPI_ISL_2370457, EPI_ISL_2370853                                                                                                                                                                                                                                                                                                                                                                                                                                                                                                                                                                                                                                                                                                                                                                                                                                                                                                                                                                                                                                                                                                                                                                | ETHNIKO KENTRO AIMODOSIAS E.KE.A.                                                                                                                                        | Greek Genome Center, Biomedical Research Foundation of the Academy of Athens (BRFAA)                                                 | Dimitrios Thanos; Efthimia Petinaki; Emmanouil Athanasiadis; Giannis Vatsellas; Katerina Zoi; Kostas Stamouliis; Theodoros Loupis                                                                                                                                                                                                                                                                                                                                                                                                                                                                                                                                                                                                                                                 |
| EPI_ISL_1811773, EPI_ISL_1811814                                                                                                                                                                                                                                                                                                                                                                                                                                                                                                                                                                                                                                                                                                                                                                                                                                                                                                                                                                                                                                                                                                                                                                | EXCITE Lab                                                                                                                                                               | Andersen lab at Scripps Research                                                                                                     | Alexandre Bolze; Alice Summerfield; Celena Andrade; Charlotte Rivera-Garcia; David Becker; Efen Sandoval; Elizabeth Cirulli; Francisco Tanudjaja; Geraint Levan; James Lu + SEARCH; Jason Nguyen; Jimmy Ramirez; Kelly Schiabor Barrett; Magnus Isaksson; Marc Laurent; Nicole L Washington; Ryan Cho; Sherry Wang; Simon White; Tyler Cassens; William Lee                                                                                                                                                                                                                                                                                                                                                                                                                       |
| EPI_ISL_593513                                                                                                                                                                                                                                                                                                                                                                                                                                                                                                                                                                                                                                                                                                                                                                                                                                                                                                                                                                                                                                                                                                                                                                                  | Eastern Ontario Regional Laboratory Association                                                                                                                          | McMaster University                                                                                                                  | Ahmed Draia; Andrew G. McArthur; Emily Panousis; Hooman Derakhshani; Jalees Nasir; Leanne Mortimer; Robert Slinger                                                                                                                                                                                                                                                                                                                                                                                                                                                                                                                                                                                                                                                                |
| EPI_ISL_2477989, EPI_ISL_2478875, EPI_ISL_2479322, EPI_ISL_2939133, EPI_ISL_2940521, EPI_ISL_2940651, EPI_ISL_2940877, EPI_ISL_2940897                                                                                                                                                                                                                                                                                                                                                                                                                                                                                                                                                                                                                                                                                                                                                                                                                                                                                                                                                                                                                                                          | see above                                                                                                                                                                | Edmonton Provincial Lab                                                                                                              | Public Health Agency of Canada (PHAC) National Microbiology Laboratory                                                                                                                                                                                                                                                                                                                                                                                                                                                                                                                                                                                                                                                                                                            |
| EPI_ISL_468044, EPI_ISL_468045, EPI_ISL_468046, EPI_ISL_468047, EPI_ISL_468048, EPI_ISL_468049, EPI_ISL_468050, EPI_ISL_468051, EPI_ISL_468052, EPI_ISL_468053, EPI_ISL_468054, EPI_ISL_468055, EPI_ISL_468056, EPI_ISL_468057, EPI_ISL_468058, EPI_ISL_468059, EPI_ISL_468060, EPI_ISL_468061, EPI_ISL_468062, EPI_ISL_475722, EPI_ISL_475723, EPI_ISL_475724, EPI_ISL_477611, EPI_ISL_478672, EPI_ISL_479686, EPI_ISL_479687, EPI_ISL_479688, EPI_ISL_479689, EPI_ISL_479690, EPI_ISL_479691, EPI_ISL_479692, EPI_ISL_479693, EPI_ISL_479694, EPI_ISL_479695, EPI_ISL_479696, EPI_ISL_479697, EPI_ISL_479698, EPI_ISL_479699, EPI_ISL_479700, EPI_ISL_479701, EPI_ISL_479702, EPI_ISL_479703, EPI_ISL_479704, EPI_ISL_479705, EPI_ISL_479706, EPI_ISL_479707, EPI_ISL_479708, EPI_ISL_479709, EPI_ISL_479710, EPI_ISL_479711, EPI_ISL_479712, EPI_ISL_479713, EPI_ISL_479714, EPI_ISL_479715, EPI_ISL_479716, EPI_ISL_479717, EPI_ISL_479718, EPI_ISL_479719, EPI_ISL_479720, EPI_ISL_479721, EPI_ISL_479722, EPI_ISL_479723, EPI_ISL_479724, EPI_ISL_479725, EPI_ISL_479726, EPI_ISL_479727, EPI_ISL_479728, EPI_ISL_479729, EPI_ISL_479730, EPI_ISL_479731, EPI_ISL_479732, EPI_ISL_479733, | see above                                                                                                                                                                | Egyptian National Cancer Institute (ENCI)                                                                                            |                                                                                                                                                                                                                                                                                                                                                                                                                                                                                                                                                                                                                                                                                                                                                                                   |
| EPI_ISL_469275                                                                                                                                                                                                                                                                                                                                                                                                                                                                                                                                                                                                                                                                                                                                                                                                                                                                                                                                                                                                                                                                                                                                                                                  | Egyptian National Cancer Institute (ENCI)                                                                                                                                | Human Genome Center                                                                                                                  | A.A.; A.N.; Abdel Rahman N; Abdel Rahman N.; Abdelhamid, W.; Abouelhoda; Abouelhoda, M.; Ahmed; Ali; Ali, M.; Amer; Bahnassy; Elkhatheb; Elsisy; Ezzelarab; Gad, A.; H.K.; Hafez; Hamdy; Hassan; Hassan, W.; K.E.; Khattab; M.A.; M.H.; M.M.; M.S.; Mahmoud; Mohamed; O.S.; Raouf, A.; S.M.; Samir, M.; Soliman, W.A.; Zekri                                                                                                                                                                                                                                                                                                                                                                                                                                                      |
| EPI_ISL_2029260                                                                                                                                                                                                                                                                                                                                                                                                                                                                                                                                                                                                                                                                                                                                                                                                                                                                                                                                                                                                                                                                                                                                                                                 | Ekstralab Tuzla                                                                                                                                                          | Alea Genetic Centre                                                                                                                  | A.A.; Abdel Rahman N; Abdelhamid, W.; Abouelhoda; Ahmed; Ali, M.; Amer; Bahnassy; Elkhatheb; Elsisy; Ezzelarab; Gad, A.; H.K.; Hafez; Hamdy; Hassan, W.; K.E.; M.H.; M.M.; M.S.; Mohamed; O.S.; Raouf, A.; S.M.; Samir, M.; Soliman; Zekri                                                                                                                                                                                                                                                                                                                                                                                                                                                                                                                                        |
| EPI_ISL_1969960, EPI_ISL_1969963                                                                                                                                                                                                                                                                                                                                                                                                                                                                                                                                                                                                                                                                                                                                                                                                                                                                                                                                                                                                                                                                                                                                                                | Emergency County Hospital Targu Mures                                                                                                                                    | National Institute of Infectious Diseases-Prof. Dr. Matei Bals Molecular Diagnostics Laboratory                                      | Adis Kandic; Dino Pecar; Enis Kandic; Lana Salihfendic; Nusret Burkovic; Rijad Konjhdzic                                                                                                                                                                                                                                                                                                                                                                                                                                                                                                                                                                                                                                                                                          |
| EPI_ISL_754751                                                                                                                                                                                                                                                                                                                                                                                                                                                                                                                                                                                                                                                                                                                                                                                                                                                                                                                                                                                                                                                                                                                                                                                  | Emory Molecular Diagnostics Laboratory, Emory Healthcare                                                                                                                 | Plantadosi Lab, Emory Department of Pathology                                                                                        | Andreea Tudor; Corina Casangiu; Dan Otelea; Leontina Banica; Marius Surlea; Ovidiu Vlaicu; Simona Paraschiv                                                                                                                                                                                                                                                                                                                                                                                                                                                                                                                                                                                                                                                                       |
| EPI_ISL_2321508                                                                                                                                                                                                                                                                                                                                                                                                                                                                                                                                                                                                                                                                                                                                                                                                                                                                                                                                                                                                                                                                                                                                                                                 | Emory University                                                                                                                                                         | Centers for Disease Control and Prevention Division of Viral Diseases, Pathogen Discovery                                            | Ahmed Babiker; Anne Piantadosi                                                                                                                                                                                                                                                                                                                                                                                                                                                                                                                                                                                                                                                                                                                                                    |
| EPI_ISL_2438624                                                                                                                                                                                                                                                                                                                                                                                                                                                                                                                                                                                                                                                                                                                                                                                                                                                                                                                                                                                                                                                                                                                                                                                 | Enbekshikazakh multidisciplinary interdistrict hospital                                                                                                                  | Reference laboratory for the control of viral infections                                                                             | Alison Laufer Halpin; Ben L. Rambo-Martin; Clinton R. Paden; Dakota Howard; Darlene Wagner; Dave Wentworth; Dhvani Batra; Jasmine Padilla; Justin Lee; Katie Dillon; Krista Queen; Kristen Knipe; Kristine Lacek; Mark Burroughs; Matthew Schmerer; Mili Sheth; Peter Cook; Sam Shepard; Sarah Nobles; Shoshona Le; Suxiang Tong; Vivien Dugan; Yvette Unarumthi                                                                                                                                                                                                                                                                                                                                                                                                                  |
| EPI_ISL_2086267                                                                                                                                                                                                                                                                                                                                                                                                                                                                                                                                                                                                                                                                                                                                                                                                                                                                                                                                                                                                                                                                                                                                                                                 | Enthabeni Lancet Laboratories                                                                                                                                            | KRISP, KZN Research Innovation and Sequencing Platform                                                                               | Aidar Ussebayev; Aknur Mutaliyeva; Andrey Komissarov; Artem Fadeev; Azamat Kenessov; Bekzhan Maikotov; Gaukhar Nussupbayeva; Madina Tleumbergenova; Maria Pisareva; Nazym Tleumbetova                                                                                                                                                                                                                                                                                                                                                                                                                                                                                                                                                                                             |
| EPI_ISL_2112529                                                                                                                                                                                                                                                                                                                                                                                                                                                                                                                                                                                                                                                                                                                                                                                                                                                                                                                                                                                                                                                                                                                                                                                 | Epidemiology of Microbial Diseases, Yale School of Public Health                                                                                                         | Epidemiology of Microbial Diseases, Yale School of Public Health                                                                     | Emmanuel SJ; Ghandhari J; Khan S; Lessells R; Mdalose K; Naidoo Y; Pillay S; Ramphal U; Tegally H; Wilkinson E; York D; de Oliveira T                                                                                                                                                                                                                                                                                                                                                                                                                                                                                                                                                                                                                                             |
| EPI_ISL_1898554, EPI_ISL_2241494, EPI_ISL_2241623                                                                                                                                                                                                                                                                                                                                                                                                                                                                                                                                                                                                                                                                                                                                                                                                                                                                                                                                                                                                                                                                                                                                               | Ethiopian Biotechnology Institute (EBTI)                                                                                                                                 | International Centre for Genetic Engineering and Biotechnology (ICGEB) and ARGO Open Lab for Genome Sequencing                       | A.E.; A.F.; Alpert, T.; Breban; Brito; C.B.; C.C.; Fauver; Grubaugh; I.M.; Iwasaki, A.; J.E.; J.R.; Kalinich; Landry; Lucas, C.; M.E.; M.I.; M.L.; N.D.; Ott; Petrone; Rothman; Vogels; Watkins                                                                                                                                                                                                                                                                                                                                                                                                                                                                                                                                                                                   |
| EPI_ISL_877391                                                                                                                                                                                                                                                                                                                                                                                                                                                                                                                                                                                                                                                                                                                                                                                                                                                                                                                                                                                                                                                                                                                                                                                  | Eurofins Diatherix                                                                                                                                                       | Hudsonalpha Genome Sequencing Center                                                                                                 | Alessandro Marcello; Danilo Licastro; Emanuele Orsini; Getnet Hailu; Hailu Dadi; Kassahun Tesfaye; Keyru Tuki; Kominist Asmamaw; Molalegne Bitew; Simeone Dal Monego; Yakob Gebregziabher Tsegay                                                                                                                                                                                                                                                                                                                                                                                                                                                                                                                                                                                  |
| EPI_ISL_1570090, EPI_ISL_1571260, EPI_ISL_1571269, EPI_ISL_1846037, EPI_ISL_1846048, EPI_ISL_1846115, EPI_ISL_1846176, EPI_ISL_1846201, EPI_ISL_2259578                                                                                                                                                                                                                                                                                                                                                                                                                                                                                                                                                                                                                                                                                                                                                                                                                                                                                                                                                                                                                                         | see above                                                                                                                                                                | Eurofins LifeCodexx GmbH                                                                                                             | Ada Stewart; Jane Grimwood; Jenell Webber; Jennifer Cart; John Lovell; Joshua Stough; Leslie Malone; Lori H. Handley; Melissa Williams; Stefan Brzezinski; Teresa Jones; and Jeremy Schmutz                                                                                                                                                                                                                                                                                                                                                                                                                                                                                                                                                                                       |
| EPI_ISL_1571477, EPI_ISL_2110761, EPI_ISL_2110762, EPI_ISL_2316402, EPI_ISL_2316415, EPI_ISL_2845449                                                                                                                                                                                                                                                                                                                                                                                                                                                                                                                                                                                                                                                                                                                                                                                                                                                                                                                                                                                                                                                                                            | Eurofins MVZ Labor Gelsenkirchen                                                                                                                                         | Robert Koch Institute                                                                                                                |                                                                                                                                                                                                                                                                                                                                                                                                                                                                                                                                                                                                                                                                                                                                                                                   |
| EPI_ISL_2803756                                                                                                                                                                                                                                                                                                                                                                                                                                                                                                                                                                                                                                                                                                                                                                                                                                                                                                                                                                                                                                                                                                                                                                                 | Everight Diagnostic Laboratory                                                                                                                                           | National Reference Laboratory, Nigeria Centre for Disease Control                                                                    | Anthony Ahumibe; Catherine Okoi; Chimaobi Chukwu; Dr Chikwe Ihekweazu; Dr Ndodo Nnaemeka; Dr Omoare Adesuyi; Grace Esebanmen; Nwando Mba; Olusola Anuoluwapo Akanbi                                                                                                                                                                                                                                                                                                                                                                                                                                                                                                                                                                                                               |
| EPI_ISL_2803754                                                                                                                                                                                                                                                                                                                                                                                                                                                                                                                                                                                                                                                                                                                                                                                                                                                                                                                                                                                                                                                                                                                                                                                 | Everight Diagnostic Laboratory                                                                                                                                           | National Reference Laboratory, Nigeria Centre for Disease Control Durumi III, Gaduwa, Abuja, Nigeria                                 | Anthony Ahumibe; Catherine Okoi; Chimaobi Chukwu; Dr Chikwe Ihekweazu; Dr Ndodo Nnaemeka; Dr Omoare Adesuyi; Grace Esebanmen; Nwando Mba; Olusola Anuoluwapo Akanbi                                                                                                                                                                                                                                                                                                                                                                                                                                                                                                                                                                                                               |
| EPI_ISL_1712303                                                                                                                                                                                                                                                                                                                                                                                                                                                                                                                                                                                                                                                                                                                                                                                                                                                                                                                                                                                                                                                                                                                                                                                 | FSBI «NATIONAL MEDICAL RESEARCH CENTER FOR OBSTETRICS, GYNECOLOGY AND PERINATOLOGY NAMED AFTER ACADEMICIAN V.I.KULAKOV» MINISTRY OF HEALTHCARE OF THE RUSSIAN FEDERATION | Center for Precision Genome Editing and Genetic Technologies for Biomedicine, Pirogov Medical University, Moscow, Russian Federation | Anastasia Shut; Andrey Krivoy; Dmitriy Korostin; Margarita Korzhanova; Vera Belova; Yegor Botsmanov                                                                                                                                                                                                                                                                                                                                                                                                                                                                                                                                                                                                                                                                               |
| EPI_ISL_1491576, EPI_ISL_1538420, EPI_ISL_1538429                                                                                                                                                                                                                                                                                                                                                                                                                                                                                                                                                                                                                                                                                                                                                                                                                                                                                                                                                                                                                                                                                                                                               | Faculty of Medicine Vajira Hospital                                                                                                                                      | COVID-19 Network Investigations (CONI) Alliance                                                                                      | Ampan Vimovattana; Anan Manomaipiboon; Angkana Huang; Anthony R. Jones; Arporn Wangwiwatsin; Bhakbhoon Panthan; Chayanit Phutthanu; Chonticha Klungtong; Duangkamon Loesbanluechai; Ekawat Pasomsub; Elizabeth Batty; Insee Semsorn; Jivraavoot Maneerit; Janjira Thaipadungpanit; Khajohn Joonlasak; Kingkan Rakmanee; Krittikorn Kumpornsin; Namfon Kotanan; Stefan Fernandez; Sunisa Dongphooay; Thanat Chookajorn; Theerarat Kochacharn; Tonsan Hansirisathit; Treewat Watthanachockchai; Uraporn Phumisantiphong; Wasun Chantratita; Wipawee Thongsopa; Wuttichai Manasatienkiy                                                                                                                                                                                              |
| EPI_ISL_1273102                                                                                                                                                                                                                                                                                                                                                                                                                                                                                                                                                                                                                                                                                                                                                                                                                                                                                                                                                                                                                                                                                                                                                                                 | Faculty of Medicine, Al-Quds University                                                                                                                                  | Faculty of Medicine, Al-Quds University                                                                                              | Al-Jawabreh, A.; Dumaidi, K.; Ereqat, S.; Nasereddin, A.                                                                                                                                                                                                                                                                                                                                                                                                                                                                                                                                                                                                                                                                                                                          |
| EPI_ISL_451966                                                                                                                                                                                                                                                                                                                                                                                                                                                                                                                                                                                                                                                                                                                                                                                                                                                                                                                                                                                                                                                                                                                                                                                  | Federal Budget Institution of Science, State Research Center for Applied Microbiology & Biotechnology                                                                    | Federal Budget Institution of Science, State Research Center for Applied Microbiology & Biotechnology                                | Abaimova A; Bakhteeva I; Blagodatikh S; Bogun A; Borzilov A; Chekan L; Chernysh S; Denisenko E; Dentovskaya S; Detushev K; Detusheva E; Dyatlov I; Firstova V; Frolov V; Fursov M; Fursova N; Galkina E; Gapelchenkova T; Goncharova J; Gorbatov A; Hlyntseva A; Ivanov S; Kalmantayev T; Kalmantayeva O; Kanashenko M; Kartsev N; Kartseva A; Khomyakov A; Khamrov M; Kisilichkina A; Kolchanova A; Koroleva-Ushakova A; Kosilova I; Krasilnikova E; Kuzin V; Kuzina E; Makarova M; Marin M; Novikova T; Platonov M; Podkopaev Y; Ryabko A; Shaikhtudinova R; Shemyakin I; Shishkina L; Silkina M; Sizova A; Skryabin Y; Slukin P; Slukina N; Solomentsiev V; Solovieva A; Teymurazov M; Timofeev V; Titareva G; Trunyakova A; Tyurin E; Vagayskaya A; Zeninskaya N; Zhumakaev R |
| EPI_ISL_2507666, EPI_ISL_2507677, EPI_ISL_2508274                                                                                                                                                                                                                                                                                                                                                                                                                                                                                                                                                                                                                                                                                                                                                                                                                                                                                                                                                                                                                                                                                                                                               | Fimlab Laboratoriot Oy Tampere                                                                                                                                           | Expert Microbiology, National Institute for Health and Welfare                                                                       | Carita Savolainen-Kopra; Erika Lindh; Haider al-Heloi; Jani Halkilaiti; Kirsi Liitsola; Niina Ikonen; Olli Vapalahti; Pekka Elonen; Phuoc Truong; Päivi Laurila; Ravi Kant; Sari Hannula; Soile Blomqvist; Teemu Smura                                                                                                                                                                                                                                                                                                                                                                                                                                                                                                                                                            |
| EPI_ISL_509726, EPI_ISL_1030086, EPI_ISL_2008721, EPI_ISL_2008761                                                                                                                                                                                                                                                                                                                                                                                                                                                                                                                                                                                                                                                                                                                                                                                                                                                                                                                                                                                                                                                                                                                               | Florida Bureau of Public Health Laboratories                                                                                                                             | Florida Bureau of Public Health Laboratories                                                                                         | Jason Blanton; Sarah Schmedes                                                                                                                                                                                                                                                                                                                                                                                                                                                                                                                                                                                                                                                                                                                                                     |
| EPI_ISL_590899, EPI_ISL_708077                                                                                                                                                                                                                                                                                                                                                                                                                                                                                                                                                                                                                                                                                                                                                                                                                                                                                                                                                                                                                                                                                                                                                                  | Foerde Hospital, Department of Microbiology                                                                                                                              | Norwegian Institute of Public Health, Department of Virology                                                                         | Hilde Elishaug; Hilde Vollan; Kamilla Heddeland Instefjord; Karoline Bragstad; Kathrine Stene-Johansen; Marie Paulsen Madsen; Olav Hungnes; Rasmus Riis Kopperud                                                                                                                                                                                                                                                                                                                                                                                                                                                                                                                                                                                                                  |
| EPI_ISL_476139                                                                                                                                                                                                                                                                                                                                                                                                                                                                                                                                                                                                                                                                                                                                                                                                                                                                                                                                                                                                                                                                                                                                                                                  | Folkhalsomyndigheten                                                                                                                                                     | The Public Health Agency of Sweden                                                                                                   | Anna Risberg; Anna-Malin Linde; Karin Tegmark-Wisell; Maria Lind Karlberg; Mattias Haukland; Olov Svartstrom; Oskar Karlsson Lindsjö; Petra Edquist; Reza Advani; Sandra Brodsson; Shamam Muradrasoli                                                                                                                                                                                                                                                                                                                                                                                                                                                                                                                                                                             |
| EPI_ISL_2889833, EPI_ISL_2889839, EPI_ISL_2889841, EPI_ISL_2889844, EPI_ISL_2889846, EPI_ISL_2889847, EPI_ISL_2889848, EPI_ISL_2889849, EPI_ISL_2889850, EPI_ISL_2889854                                                                                                                                                                                                                                                                                                                                                                                                                                                                                                                                                                                                                                                                                                                                                                                                                                                                                                                                                                                                                        | see above                                                                                                                                                                | Fondation Congolaise pour la recherche medicale (FCRM)                                                                               | Abel Lissom; Batchi-Bouyou Armel Landry; Francine Ntoumi; Jean Claude Djontu; Mfoutou Mapanguy Claujens Chastel; Thirumalaisamy P. Velavan                                                                                                                                                                                                                                                                                                                                                                                                                                                                                                                                                                                                                                        |
| EPI_ISL_581455, EPI_ISL_581491, EPI_ISL_581492                                                                                                                                                                                                                                                                                                                                                                                                                                                                                                                                                                                                                                                                                                                                                                                                                                                                                                                                                                                                                                                                                                                                                  | Fondation Congolaise pour la recherche medicale (FCRM)                                                                                                                   | NGS Competence Center Tübingen, Institut für Medizinische Mikrobiologie und Hygiene, Universitätsklinikum Tübingen                   | Angel Angelov                                                                                                                                                                                                                                                                                                                                                                                                                                                                                                                                                                                                                                                                                                                                                                     |
| EPI_ISL_2087052                                                                                                                                                                                                                                                                                                                                                                                                                                                                                                                                                                                                                                                                                                                                                                                                                                                                                                                                                                                                                                                                                                                                                                                 | Fondation Congolaise pour la recherche medicale (FCRM), Francine Ntoumi                                                                                                  | Centre de Recherche sur les Maladies Infectieuses                                                                                    | Mfoutou Mapanguy Claujeans Chastel and Batchi-Bouyou Armel Landry; Prof. Dr. Thirumalaisamy P. Velavan; Prof. Francine Ntoumi                                                                                                                                                                                                                                                                                                                                                                                                                                                                                                                                                                                                                                                     |
| EPI_ISL_2964949, EPI_ISL_2964950, EPI_ISL_2964955, EPI_ISL_3040125, EPI_ISL_3040129, EPI_ISL_3040130, EPI_ISL_3040133, EPI_ISL_3040134, EPI_ISL_3040135, EPI_ISL_3040137                                                                                                                                                                                                                                                                                                                                                                                                                                                                                                                                                                                                                                                                                                                                                                                                                                                                                                                                                                                                                        | see above                                                                                                                                                                | Fondation Congolaise pour la recherche medicale (FCRM), Francine Ntoumi                                                              | Batchi-Bouyou Armel Landry; Dr. Abel Lissom; Dr. Jean Claude Djontu; Mfoutou Mapanguy Claujens Chastel; Prof. Dr. Thirumalaisamy P. Velavan; Prof. Francine Ntoumi                                                                                                                                                                                                                                                                                                                                                                                                                                                                                                                                                                                                                |
| EPI_ISL_1671925, EPI_ISL_1840863, EPI_ISL_1854769,                                                                                                                                                                                                                                                                                                                                                                                                                                                                                                                                                                                                                                                                                                                                                                                                                                                                                                                                                                                                                                                                                                                                              | Fondation Congolaise pour la recherche medicale (FCRM), Francine Ntoumi                                                                                                  | Institute of Tropical Medicine                                                                                                       | Mfoutou Mapanguy Claujeans Chastel and Batchi-Bouyou Armel Landry; Prof. Dr. Thirumalaisamy P. Velavan; Prof. Dr. Thirumalaisamy P. Velavan and Prof. Francine Ntoumi; Prof. Francine Ntoumi                                                                                                                                                                                                                                                                                                                                                                                                                                                                                                                                                                                      |

|                                                                                                                                                                                                                                                                                                                                                                                                                                                                                                                                                                                                                                                                                                                                                                                                                                                                                                                                                                                                                                                                                                                                                                                                                                                                                                                                                                                                                                                                                                                                                                                                                                                                                                                                                                                                                                                                                                                                                                                                                                                                                                                                                                                                                                                                                                                                                                                                                                                      |                                                                                                                 |                                                                                                                         |                                                                                                                                                                                                                                     |                                                                                                                                                                                                                                                                                                                                                                                                                                                                                            |
|------------------------------------------------------------------------------------------------------------------------------------------------------------------------------------------------------------------------------------------------------------------------------------------------------------------------------------------------------------------------------------------------------------------------------------------------------------------------------------------------------------------------------------------------------------------------------------------------------------------------------------------------------------------------------------------------------------------------------------------------------------------------------------------------------------------------------------------------------------------------------------------------------------------------------------------------------------------------------------------------------------------------------------------------------------------------------------------------------------------------------------------------------------------------------------------------------------------------------------------------------------------------------------------------------------------------------------------------------------------------------------------------------------------------------------------------------------------------------------------------------------------------------------------------------------------------------------------------------------------------------------------------------------------------------------------------------------------------------------------------------------------------------------------------------------------------------------------------------------------------------------------------------------------------------------------------------------------------------------------------------------------------------------------------------------------------------------------------------------------------------------------------------------------------------------------------------------------------------------------------------------------------------------------------------------------------------------------------------------------------------------------------------------------------------------------------------|-----------------------------------------------------------------------------------------------------------------|-------------------------------------------------------------------------------------------------------------------------|-------------------------------------------------------------------------------------------------------------------------------------------------------------------------------------------------------------------------------------|--------------------------------------------------------------------------------------------------------------------------------------------------------------------------------------------------------------------------------------------------------------------------------------------------------------------------------------------------------------------------------------------------------------------------------------------------------------------------------------------|
| EPI_ISL_1854789,<br>EPI_ISL_1854794,<br>EPI_ISL_1857281                                                                                                                                                                                                                                                                                                                                                                                                                                                                                                                                                                                                                                                                                                                                                                                                                                                                                                                                                                                                                                                                                                                                                                                                                                                                                                                                                                                                                                                                                                                                                                                                                                                                                                                                                                                                                                                                                                                                                                                                                                                                                                                                                                                                                                                                                                                                                                                              |                                                                                                                 |                                                                                                                         |                                                                                                                                                                                                                                     |                                                                                                                                                                                                                                                                                                                                                                                                                                                                                            |
| EPI_ISL_912358,<br>EPI_ISL_912371,<br>EPI_ISL_912394                                                                                                                                                                                                                                                                                                                                                                                                                                                                                                                                                                                                                                                                                                                                                                                                                                                                                                                                                                                                                                                                                                                                                                                                                                                                                                                                                                                                                                                                                                                                                                                                                                                                                                                                                                                                                                                                                                                                                                                                                                                                                                                                                                                                                                                                                                                                                                                                 | Fondation Congolaise pour la recherche medicale (FCRM),<br>Francine Ntumi                                       | NGS Competence Center Tuebingen, Institut für Medizinische<br>Mikrobiologie und Hygiene, Universitaetsklinikum Tübingen |                                                                                                                                                                                                                                     | Angel Angelov                                                                                                                                                                                                                                                                                                                                                                                                                                                                              |
| EPI_ISL_1666171, EPI_ISL_1992782, EPI_ISL_2038596, EPI_ISL_2525602, EPI_ISL_2785604, EPI_ISL_2785740, EPI_ISL_2928732                                                                                                                                                                                                                                                                                                                                                                                                                                                                                                                                                                                                                                                                                                                                                                                                                                                                                                                                                                                                                                                                                                                                                                                                                                                                                                                                                                                                                                                                                                                                                                                                                                                                                                                                                                                                                                                                                                                                                                                                                                                                                                                                                                                                                                                                                                                                | see above                                                                                                       | Fulgent Genetics                                                                                                        | Centers for Disease Control and Prevention Division of Viral<br>Diseases, Pathogen Discovery                                                                                                                                        | Adrian Paskey; Becky Tsai; Benafsh Sapra; Benjamin Rambo-Martin; Christopher Gulvick; Clinton R. Paden; Dakota Howard; Darlene Wagner; Dhvani Batra; Doreen Ng; Duncan MacCannell; Harry Gao; James Xie; Jason Caravas; John Gao; Joseph Fierro; Kara Moser; Matthew Schmerer; Mickey Li; Peter W. Cook; Scott Sammons; Shatavia Morrison; Yan Meng; Yvette Unoarumhi                                                                                                                      |
| EPI_ISL_1026982,<br>EPI_ISL_1027144,<br>EPI_ISL_1068425                                                                                                                                                                                                                                                                                                                                                                                                                                                                                                                                                                                                                                                                                                                                                                                                                                                                                                                                                                                                                                                                                                                                                                                                                                                                                                                                                                                                                                                                                                                                                                                                                                                                                                                                                                                                                                                                                                                                                                                                                                                                                                                                                                                                                                                                                                                                                                                              |                                                                                                                 | Fulgent Genetics                                                                                                        | Fulgent Genetics                                                                                                                                                                                                                    | Becky Tsai; Benafsh Sapra; Doreen Ng; Harry Gao; James Xie; John Gao; Joseph Fierro; Mickey Li; Yan Meng                                                                                                                                                                                                                                                                                                                                                                                   |
| EPI_ISL_1182612                                                                                                                                                                                                                                                                                                                                                                                                                                                                                                                                                                                                                                                                                                                                                                                                                                                                                                                                                                                                                                                                                                                                                                                                                                                                                                                                                                                                                                                                                                                                                                                                                                                                                                                                                                                                                                                                                                                                                                                                                                                                                                                                                                                                                                                                                                                                                                                                                                      | Fundação Ezequiel Dias (FUNED)                                                                                  |                                                                                                                         | Coordenação Geral de Laboratórios de Saúde Pública<br>(CGLAB/DAEVs/SVS/MS)                                                                                                                                                          | Vagner Fonseca; et al.                                                                                                                                                                                                                                                                                                                                                                                                                                                                     |
| EPI_ISL_493362,<br>EPI_ISL_2788586,<br>EPI_ISL_2925776,<br>EPI_ISL_3008324                                                                                                                                                                                                                                                                                                                                                                                                                                                                                                                                                                                                                                                                                                                                                                                                                                                                                                                                                                                                                                                                                                                                                                                                                                                                                                                                                                                                                                                                                                                                                                                                                                                                                                                                                                                                                                                                                                                                                                                                                                                                                                                                                                                                                                                                                                                                                                           |                                                                                                                 | Furst Medical Laboratory                                                                                                | Norwegian Institute of Public Health, Department of Virology                                                                                                                                                                        | Atiya R Ali; Debech Nadia; Engebretsen Serina Beate; Garcia Llorente Ignacio; Hilde Elshaug; Hilde Vollan; Jon Bråte; Kamilla Heddeland Instefjord; Karoline Bragstad; Kathrine Stene-Johansen; Line Victoria Moen; Marie Paulsen Madsen; Olav Hugnnes; Pedersen Benedikte Nevjen; Rasmus Riis Kopperud                                                                                                                                                                                    |
| EPI_ISL_1318590                                                                                                                                                                                                                                                                                                                                                                                                                                                                                                                                                                                                                                                                                                                                                                                                                                                                                                                                                                                                                                                                                                                                                                                                                                                                                                                                                                                                                                                                                                                                                                                                                                                                                                                                                                                                                                                                                                                                                                                                                                                                                                                                                                                                                                                                                                                                                                                                                                      | GA Department of Public Health Laboratory                                                                       |                                                                                                                         | Centers for Disease Control and Prevention Division of Viral<br>Diseases, Pathogen Discovery                                                                                                                                        | Anna Montmayeur; Anna Uehara; Ben L. Rambo-Martin; Clinton R. Paden; Dhvani Batra; Haibin Wang; Jasmine Padilla; Jing Zhang; Justin Lee; Katie Dillon; Krista Queen; Kristen Knipe; Kristine Lacek; Lori Rowe; Mark Burroughs; Matthew Schmerer; Mili Sheth; Peter W. Cook; Rachel Marine; Sam Shepard; Sarah Nobles; Shoshona Le; Suxiang Tong; Yan Li; Ying Tao                                                                                                                          |
| EPI_ISL_1672509,<br>EPI_ISL_2333929                                                                                                                                                                                                                                                                                                                                                                                                                                                                                                                                                                                                                                                                                                                                                                                                                                                                                                                                                                                                                                                                                                                                                                                                                                                                                                                                                                                                                                                                                                                                                                                                                                                                                                                                                                                                                                                                                                                                                                                                                                                                                                                                                                                                                                                                                                                                                                                                                  | GH A.CHEDEVIER-H.MONDOR                                                                                         |                                                                                                                         | Department of Virology, Henri Mondor University Hospital,<br>Assistance Publique Hôpitaux de Paris, Université Paris-Est<br>Créteil, INSERM U955                                                                                    | Alexandre Soulier; Christophe Rodriguez; Elisabeth Trawinski; Guillaume Gricourt; Jean-Michel Pawlowsky; Melissa N'Debi; Slim Fourati; Vanessa Demontant                                                                                                                                                                                                                                                                                                                                   |
| EPI_ISL_2779388                                                                                                                                                                                                                                                                                                                                                                                                                                                                                                                                                                                                                                                                                                                                                                                                                                                                                                                                                                                                                                                                                                                                                                                                                                                                                                                                                                                                                                                                                                                                                                                                                                                                                                                                                                                                                                                                                                                                                                                                                                                                                                                                                                                                                                                                                                                                                                                                                                      | GK Prison Kiambu                                                                                                |                                                                                                                         | USAMRD-A, Basic Science Laboratory                                                                                                                                                                                                  | Alan Lemtudo; Beth Mutai; Brian Andika; Carol Kifude; Clement Masakwe; Eric Muthanje; Esther Omuseni; Faith Sigei; Gathii Kimita; George Awinda; John Waitumbi; Josphat Nyataya; Rachel Githii; Rehema Liyai; Stephen Ochola                                                                                                                                                                                                                                                               |
| EPI_ISL_2779313,<br>EPI_ISL_2779316                                                                                                                                                                                                                                                                                                                                                                                                                                                                                                                                                                                                                                                                                                                                                                                                                                                                                                                                                                                                                                                                                                                                                                                                                                                                                                                                                                                                                                                                                                                                                                                                                                                                                                                                                                                                                                                                                                                                                                                                                                                                                                                                                                                                                                                                                                                                                                                                                  | GK Prisons Dispensary Kapsabet                                                                                  |                                                                                                                         | USAMRD-A, Basic Science Laboratory                                                                                                                                                                                                  | Alan Lemtudo; Beth Mutai; Brian Andika; Carol Kifude; Clement Masakwe; Eric Muthanje; Esther Omuseni; Faith Sigei; Gathii Kimita; George Awinda; John Waitumbi; Josphat Nyataya; Rachel Githii; Rehema Liyai; Stephen Ochola                                                                                                                                                                                                                                                               |
| EPI_ISL_2864606                                                                                                                                                                                                                                                                                                                                                                                                                                                                                                                                                                                                                                                                                                                                                                                                                                                                                                                                                                                                                                                                                                                                                                                                                                                                                                                                                                                                                                                                                                                                                                                                                                                                                                                                                                                                                                                                                                                                                                                                                                                                                                                                                                                                                                                                                                                                                                                                                                      | Ga East Hospital                                                                                                |                                                                                                                         | UHAS COVID-19 Lab                                                                                                                                                                                                                   | John O. Gyapong and the UHAS COVID-19 Lab Team; Jones Gyamfi; Kwabena O. Duedu; Reuben Ayivor-Djanie                                                                                                                                                                                                                                                                                                                                                                                       |
| EPI_ISL_831977                                                                                                                                                                                                                                                                                                                                                                                                                                                                                                                                                                                                                                                                                                                                                                                                                                                                                                                                                                                                                                                                                                                                                                                                                                                                                                                                                                                                                                                                                                                                                                                                                                                                                                                                                                                                                                                                                                                                                                                                                                                                                                                                                                                                                                                                                                                                                                                                                                       | Gavle klinisk mikrobiologi                                                                                      |                                                                                                                         | The Public Health Agency of Sweden                                                                                                                                                                                                  | Department of Microbiology; The Public Health Agency of Sweden                                                                                                                                                                                                                                                                                                                                                                                                                             |
| EPI_ISL_730577,<br>EPI_ISL_984749                                                                                                                                                                                                                                                                                                                                                                                                                                                                                                                                                                                                                                                                                                                                                                                                                                                                                                                                                                                                                                                                                                                                                                                                                                                                                                                                                                                                                                                                                                                                                                                                                                                                                                                                                                                                                                                                                                                                                                                                                                                                                                                                                                                                                                                                                                                                                                                                                    | Gazi University Faculty of Medicine, Medical Virology<br>Laboratory                                             |                                                                                                                         | Gazi University Faculty of Medicine, Medical Virology<br>Laboratory                                                                                                                                                                 | Erdem Şahin; Gülelendam Bozdazy; Hager Muftah; İşıl Fidan; Kayhan Çağlar; Murat Dizbay; Selin Yılığit; Shaknoza Sarzhanova; Özlem Güzel Tunçcan                                                                                                                                                                                                                                                                                                                                            |
| EPI_ISL_3026015,<br>EPI_ISL_3026016,<br>EPI_ISL_3026019,<br>EPI_ISL_3026020                                                                                                                                                                                                                                                                                                                                                                                                                                                                                                                                                                                                                                                                                                                                                                                                                                                                                                                                                                                                                                                                                                                                                                                                                                                                                                                                                                                                                                                                                                                                                                                                                                                                                                                                                                                                                                                                                                                                                                                                                                                                                                                                                                                                                                                                                                                                                                          | Geelong Centre for Emerging Infectious Diseases, Deakin<br>University                                           |                                                                                                                         | Geelong Centre for Emerging Infectious Diseases, Deakin<br>University                                                                                                                                                               | Alexandersen, S.; Bhatta; Chamings, A.; T.R.                                                                                                                                                                                                                                                                                                                                                                                                                                               |
| EPI_ISL_2681409,<br>EPI_ISL_2681439                                                                                                                                                                                                                                                                                                                                                                                                                                                                                                                                                                                                                                                                                                                                                                                                                                                                                                                                                                                                                                                                                                                                                                                                                                                                                                                                                                                                                                                                                                                                                                                                                                                                                                                                                                                                                                                                                                                                                                                                                                                                                                                                                                                                                                                                                                                                                                                                                  | General Hospital "8th of September"                                                                             |                                                                                                                         | Laboratory of virology and molecular diagnostics, Institute of<br>Public Health                                                                                                                                                     | Boshevska G; Janchevska E.; Kuzmanovska M                                                                                                                                                                                                                                                                                                                                                                                                                                                  |
| EPI_ISL_933566,<br>EPI_ISL_934314                                                                                                                                                                                                                                                                                                                                                                                                                                                                                                                                                                                                                                                                                                                                                                                                                                                                                                                                                                                                                                                                                                                                                                                                                                                                                                                                                                                                                                                                                                                                                                                                                                                                                                                                                                                                                                                                                                                                                                                                                                                                                                                                                                                                                                                                                                                                                                                                                    | General Hospital - Bitola                                                                                       |                                                                                                                         | Research Center for Genetic Engineering and Biotechnology<br>"Georgi D. Efremov" , Macedonian Academy of Sciences and<br>Arts                                                                                                       | RCGEB - MASA                                                                                                                                                                                                                                                                                                                                                                                                                                                                               |
| EPI_ISL_933775                                                                                                                                                                                                                                                                                                                                                                                                                                                                                                                                                                                                                                                                                                                                                                                                                                                                                                                                                                                                                                                                                                                                                                                                                                                                                                                                                                                                                                                                                                                                                                                                                                                                                                                                                                                                                                                                                                                                                                                                                                                                                                                                                                                                                                                                                                                                                                                                                                       | General Hospital - Ohrid                                                                                        |                                                                                                                         | Research Center for Genetic Engineering and Biotechnology<br>"Georgi D. Efremov" , Macedonian Academy of Sciences and<br>Arts                                                                                                       | RCGEB - MASA                                                                                                                                                                                                                                                                                                                                                                                                                                                                               |
| EPI_ISL_677674                                                                                                                                                                                                                                                                                                                                                                                                                                                                                                                                                                                                                                                                                                                                                                                                                                                                                                                                                                                                                                                                                                                                                                                                                                                                                                                                                                                                                                                                                                                                                                                                                                                                                                                                                                                                                                                                                                                                                                                                                                                                                                                                                                                                                                                                                                                                                                                                                                       | General Hospital - Prilep                                                                                       |                                                                                                                         | Research Center for Genetic Engineering and Biotechnology<br>"Georgi D. Efremov" , Macedonian Academy of Sciences and<br>Arts                                                                                                       | RCGEB - MASA                                                                                                                                                                                                                                                                                                                                                                                                                                                                               |
| EPI_ISL_933602,<br>EPI_ISL_934413                                                                                                                                                                                                                                                                                                                                                                                                                                                                                                                                                                                                                                                                                                                                                                                                                                                                                                                                                                                                                                                                                                                                                                                                                                                                                                                                                                                                                                                                                                                                                                                                                                                                                                                                                                                                                                                                                                                                                                                                                                                                                                                                                                                                                                                                                                                                                                                                                    | General Hospital - Shtip                                                                                        |                                                                                                                         | Research Center for Genetic Engineering and Biotechnology<br>"Georgi D. Efremov" , Macedonian Academy of Sciences and<br>Arts                                                                                                       | RCGEB - MASA                                                                                                                                                                                                                                                                                                                                                                                                                                                                               |
| EPI_ISL_3020343                                                                                                                                                                                                                                                                                                                                                                                                                                                                                                                                                                                                                                                                                                                                                                                                                                                                                                                                                                                                                                                                                                                                                                                                                                                                                                                                                                                                                                                                                                                                                                                                                                                                                                                                                                                                                                                                                                                                                                                                                                                                                                                                                                                                                                                                                                                                                                                                                                      | General Hospital Tetovo                                                                                         |                                                                                                                         | Laboratory of virology and molecular diagnostics, Institute of<br>Public Health                                                                                                                                                     | Boshevska G; Janchevska E.; Kuzmanovska M                                                                                                                                                                                                                                                                                                                                                                                                                                                  |
| EPI_ISL_406798                                                                                                                                                                                                                                                                                                                                                                                                                                                                                                                                                                                                                                                                                                                                                                                                                                                                                                                                                                                                                                                                                                                                                                                                                                                                                                                                                                                                                                                                                                                                                                                                                                                                                                                                                                                                                                                                                                                                                                                                                                                                                                                                                                                                                                                                                                                                                                                                                                       | General Hospital of Central Theater Command of People's<br>Liberation Army of China                             |                                                                                                                         | BGI & Institute of Microbiology, Chinese Academy of Sciences<br>& Shandong First Medical University & Shandong Academy of<br>Medical Sciences & General Hospital of Central Theater<br>Command of People's Liberation Army of China | Weifeng Shi and Zhenhong Hu; Weijun Chen; Yuhai Bi                                                                                                                                                                                                                                                                                                                                                                                                                                         |
| EPI_ISL_746523, EPI_ISL_1167697, EPI_ISL_1167721, EPI_ISL_1167794, EPI_ISL_1167814, EPI_ISL_1167878, EPI_ISL_1167922, EPI_ISL_1167925, EPI_ISL_1300477, EPI_ISL_1321468, EPI_ISL_1321493, EPI_ISL_1321508, EPI_ISL_1534569, EPI_ISL_1534583, EPI_ISL_1541011, EPI_ISL_1541012, EPI_ISL_1541035, EPI_ISL_1633372, EPI_ISL_1633383, EPI_ISL_1633418, EPI_ISL_1633500, EPI_ISL_2009203, EPI_ISL_2009256, EPI_ISL_2009293, EPI_ISL_2009637, EPI_ISL_2391042, EPI_ISL_2391174, EPI_ISL_2391176, EPI_ISL_2391269, EPI_ISL_2391355, EPI_ISL_2391412, EPI_ISL_2391442, EPI_ISL_2543475, EPI_ISL_2543539, EPI_ISL_2543664, EPI_ISL_2557275, EPI_ISL_2597292, EPI_ISL_2659168, EPI_ISL_2659197, EPI_ISL_2756220, EPI_ISL_2756329, EPI_ISL_2756330, EPI_ISL_2756336, EPI_ISL_2756337, EPI_ISL_2892690, EPI_ISL_2892741, EPI_ISL_2892797, EPI_ISL_2894889, EPI_ISL_2896177                                                                                                                                                                                                                                                                                                                                                                                                                                                                                                                                                                                                                                                                                                                                                                                                                                                                                                                                                                                                                                                                                                                                                                                                                                                                                                                                                                                                                                                                                                                                                                                       | see above                                                                                                       | Genetica Molecular and Subdepartamento de Virologia ISP<br>Chile                                                        | Instituto de Salud Publica de Chile                                                                                                                                                                                                 | Andres Castillo; Barbara Parra; Constanza Campano; Giselle Barra; Jaime Lagos; Javier Tognarelli; Jorge Fernandez; Karen Oróstica; Loredana Arata; Patricia Bustos; Rodrigo Fasce; Soledad Ulloa                                                                                                                                                                                                                                                                                           |
| EPI_ISL_480245,<br>EPI_ISL_735371                                                                                                                                                                                                                                                                                                                                                                                                                                                                                                                                                                                                                                                                                                                                                                                                                                                                                                                                                                                                                                                                                                                                                                                                                                                                                                                                                                                                                                                                                                                                                                                                                                                                                                                                                                                                                                                                                                                                                                                                                                                                                                                                                                                                                                                                                                                                                                                                                    | Genomic Laboratory (GLAB) (Conjoint lab of Health<br>Directorate of Istanbul and Istanbul Technical University) |                                                                                                                         | Genomic Laboratory (GLAB), Istanbul Technical University                                                                                                                                                                            | Arzu Irvem; Ayse Serra Ozel; Betsi Kose; Betsi Köse; Bugra Agaoglu; Elifnaz Çelik; Gizem Alkurt; Gizem Dinler Doganay; Ilker Karacan; Jale Yıldız; Levent Doganay; Mehtap Aydin; Mehtap Aydin; Nihat Bugra Agaoglu; Nilusun Altunal; Nisan Denizce Can; Ozlem Akgun Dogan; Payam Zolfagharian; Tugba Kizilboga Akgun; Yasemin Kendir Demirkol                                                                                                                                              |
| EPI_ISL_1673680                                                                                                                                                                                                                                                                                                                                                                                                                                                                                                                                                                                                                                                                                                                                                                                                                                                                                                                                                                                                                                                                                                                                                                                                                                                                                                                                                                                                                                                                                                                                                                                                                                                                                                                                                                                                                                                                                                                                                                                                                                                                                                                                                                                                                                                                                                                                                                                                                                      | Genomic Research Lab, BCSIR                                                                                     |                                                                                                                         | Genomic Research Lab, BCSIR                                                                                                                                                                                                         | Abu Sayeed Mohammad Mahmud; Barna Goswami; Eshrar Osman; Iffat Jahan; Md. Ahsan Habib; Md. Murshed Hasan Sarkar; Md. Saddam Hossain; Md. Salim Khan; Mohammad Mohi Uddin; Mohammad Samir Uzzaman; Shahina Akter; Tanjina Akhter Banu                                                                                                                                                                                                                                                       |
| EPI_ISL_2862015                                                                                                                                                                                                                                                                                                                                                                                                                                                                                                                                                                                                                                                                                                                                                                                                                                                                                                                                                                                                                                                                                                                                                                                                                                                                                                                                                                                                                                                                                                                                                                                                                                                                                                                                                                                                                                                                                                                                                                                                                                                                                                                                                                                                                                                                                                                                                                                                                                      | Genomic Research Laboratory, Bangabandhu Sheikh Mujib<br>Medical University (BSMMU) Shahbag, Dhaka_1000         |                                                                                                                         | Genomic Research Laboratory, BSMMU                                                                                                                                                                                                  | Arifa Akram; Laila Anjumman Banu; Md.Saydur Rahman; Md.Sharfuddin Ahmed; Sharadindu Kanti Sinha                                                                                                                                                                                                                                                                                                                                                                                            |
| EPI_ISL_632908                                                                                                                                                                                                                                                                                                                                                                                                                                                                                                                                                                                                                                                                                                                                                                                                                                                                                                                                                                                                                                                                                                                                                                                                                                                                                                                                                                                                                                                                                                                                                                                                                                                                                                                                                                                                                                                                                                                                                                                                                                                                                                                                                                                                                                                                                                                                                                                                                                       | Genomic Sciences, Rehman Medical Institute                                                                      |                                                                                                                         | Genomic Sciences, Rehman Medical Institute                                                                                                                                                                                          | Afridi, Ali, J.; H. and Jehanzeb, V.; Haider, Jan; S.A.; Sabiha, B.; U.K.                                                                                                                                                                                                                                                                                                                                                                                                                  |
| EPI_ISL_812783, EPI_ISL_812784, EPI_ISL_812785, EPI_ISL_812786, EPI_ISL_812787, EPI_ISL_812788, EPI_ISL_812789, EPI_ISL_812790, EPI_ISL_812791, EPI_ISL_812792, EPI_ISL_812793, EPI_ISL_812794, EPI_ISL_812795, EPI_ISL_812796, EPI_ISL_812797, EPI_ISL_812798, EPI_ISL_812799, EPI_ISL_812800, EPI_ISL_812801, EPI_ISL_812802, EPI_ISL_812803, EPI_ISL_812804, EPI_ISL_812805, EPI_ISL_812806, EPI_ISL_812807, EPI_ISL_812808, EPI_ISL_812809, EPI_ISL_812810, EPI_ISL_812811, EPI_ISL_812812, EPI_ISL_812813, EPI_ISL_812814, EPI_ISL_812815, EPI_ISL_812816, EPI_ISL_812817, EPI_ISL_812818, EPI_ISL_812819, EPI_ISL_812820, EPI_ISL_812821, EPI_ISL_812822, EPI_ISL_812823, EPI_ISL_812824, EPI_ISL_812825, EPI_ISL_812826, EPI_ISL_812827, EPI_ISL_812828, EPI_ISL_812829, EPI_ISL_812830, EPI_ISL_812831, EPI_ISL_812832, EPI_ISL_812833, EPI_ISL_812834, EPI_ISL_812835, EPI_ISL_812836, EPI_ISL_812837, EPI_ISL_812838, EPI_ISL_812839, EPI_ISL_812840, EPI_ISL_812841, EPI_ISL_812842, EPI_ISL_812843, EPI_ISL_812844, EPI_ISL_812845, EPI_ISL_812846, EPI_ISL_812847, EPI_ISL_812848, EPI_ISL_812849, EPI_ISL_812850, EPI_ISL_812851, EPI_ISL_812852, EPI_ISL_812853, EPI_ISL_812854, EPI_ISL_812855, EPI_ISL_812856, EPI_ISL_812857, EPI_ISL_812858, EPI_ISL_812859, EPI_ISL_812860, EPI_ISL_812861, EPI_ISL_812862, EPI_ISL_812863, EPI_ISL_812864, EPI_ISL_812865, EPI_ISL_812866, EPI_ISL_812867, EPI_ISL_812868, EPI_ISL_812869, EPI_ISL_812870, EPI_ISL_812871, EPI_ISL_812872, EPI_ISL_2566472, EPI_ISL_2566473, EPI_ISL_2566474, EPI_ISL_2566475, EPI_ISL_2566476, EPI_ISL_2566477, EPI_ISL_2566478, EPI_ISL_2566479, EPI_ISL_2566480, EPI_ISL_2566482, EPI_ISL_2566487, EPI_ISL_2566488, EPI_ISL_2566489, EPI_ISL_2566490, EPI_ISL_2566491, EPI_ISL_2566492, EPI_ISL_2566493, EPI_ISL_2566494, EPI_ISL_2566495, EPI_ISL_2566496, EPI_ISL_2566497, EPI_ISL_2566498, EPI_ISL_2566499, EPI_ISL_2566500, EPI_ISL_2566501, EPI_ISL_2566502, EPI_ISL_2566503, EPI_ISL_2566504, EPI_ISL_2566505, EPI_ISL_2566506, EPI_ISL_2566507, EPI_ISL_2566508, EPI_ISL_2566509, EPI_ISL_2566510, EPI_ISL_2566511, EPI_ISL_2566512, EPI_ISL_2566513, EPI_ISL_2566514, EPI_ISL_2566515, EPI_ISL_2566516, EPI_ISL_2566517, EPI_ISL_2566518, EPI_ISL_2566519, EPI_ISL_2566520, EPI_ISL_2566521, EPI_ISL_2566522, EPI_ISL_2566523, EPI_ISL_2566524, EPI_ISL_2566525, EPI_ISL_2566526, EPI_ISL_2566527, EPI_ISL_2566528, EPI_ISL_2566529, EPI_ISL_2566530 | see above                                                                                                       | Genomics Program, Children Cancer Hospital                                                                              | Genomics Program, Children Cancer Hospital                                                                                                                                                                                          | Abdelaziz, H.; Abdo, I.; Abouelnaga, S.; Almeldin, A.; Amer, K.; Bakry, U.; Diab, A.; El-Shaqqery, H.; El-Zayat, M.; ElHaddad, A.; ElHalafawy, A.; Elnaqeb, M.; Farawela, H.; Farawyla, H.; Gomaa, C.; Hadad, A.; Halafawy, A.; Hammad, M.; Hassan, R.; Hassan, W.; Hatem, A.; Hossam, M.; Hussein, S.; Ismail, J.; Jalal, D.; Magdeldin, S.; Mansour, T.; Monuir, G.; Saaid, M.; Saïd, D.; Salah, H.; Samir, O.; Sayed, A.; Shalaby, L.; Soliman, M.; Soliman, S.; Yahia, A.; shalaby, L. |
| EPI_ISL_2510688                                                                                                                                                                                                                                                                                                                                                                                                                                                                                                                                                                                                                                                                                                                                                                                                                                                                                                                                                                                                                                                                                                                                                                                                                                                                                                                                                                                                                                                                                                                                                                                                                                                                                                                                                                                                                                                                                                                                                                                                                                                                                                                                                                                                                                                                                                                                                                                                                                      | Genomics Program, Children Cancer Hospital                                                                      |                                                                                                                         | Genomics Program, Children Cancer Hospital                                                                                                                                                                                          | Abdelaziz, H.; Abdo, I.; Abouelnaga, S.; Almeldin, A.; Amer, K.; Diab, A.; El-Shaqqery, H.; El-Zayat, M.; ElHaddad, A.; ElHalafawy, A.; Elnaqeb, M.; Farawela, H.; Hammad, M.; Hassan, R.; Hassan, W.; Hatem, A.; Hossam, M.; Hussein, S.; Ismail, J.; Jalal, D.; Mansour, T.; O. and Sayed, A.; Saaid, M.; Saïd, D.; Salah, H.; Samir, Shalaby, L.; Soliman, S.; Yahia, A.                                                                                                                |
| EPI_ISL_2434978                                                                                                                                                                                                                                                                                                                                                                                                                                                                                                                                                                                                                                                                                                                                                                                                                                                                                                                                                                                                                                                                                                                                                                                                                                                                                                                                                                                                                                                                                                                                                                                                                                                                                                                                                                                                                                                                                                                                                                                                                                                                                                                                                                                                                                                                                                                                                                                                                                      | Genomik Solidaritas Indonesia Laboratorium                                                                      |                                                                                                                         | Genomik Solidaritas Indonesia Laboratorium                                                                                                                                                                                          | Alfin Mohammad Abdillah; Anindya Pradipta Susanto; Annisa Muthiah Sukirman; Ariel Pradipta; Carissa Sintca Wijaya; Dhahlia Agustina Cahyono; Gracia Felias Enos Korompis; Meutia Yupiteri Kumaheri; Normastuti Adhni Tanty; Vania Gavriila Wikasa                                                                                                                                                                                                                                          |
| EPI_ISL_2140696,<br>EPI_ISL_2802110                                                                                                                                                                                                                                                                                                                                                                                                                                                                                                                                                                                                                                                                                                                                                                                                                                                                                                                                                                                                                                                                                                                                                                                                                                                                                                                                                                                                                                                                                                                                                                                                                                                                                                                                                                                                                                                                                                                                                                                                                                                                                                                                                                                                                                                                                                                                                                                                                  | George Hospital wc GRH                                                                                          |                                                                                                                         | NHLS/UJCT                                                                                                                                                                                                                           | Arash Iranzadeh; Bruna Galvão; Carolyn Williamson; Deelan Doolabh; Diana Hardie; Ger Marais; Innocent Mudau; Kruger Marais; Lynn Tyers; Marvin Hsiao; Stephen Korsman                                                                                                                                                                                                                                                                                                                      |
| EPI_ISL_1744345,<br>EPI_ISL_1744346,<br>EPI_ISL_2248892,<br>EPI_ISL_2340163,<br>EPI_ISL_2340181                                                                                                                                                                                                                                                                                                                                                                                                                                                                                                                                                                                                                                                                                                                                                                                                                                                                                                                                                                                                                                                                                                                                                                                                                                                                                                                                                                                                                                                                                                                                                                                                                                                                                                                                                                                                                                                                                                                                                                                                                                                                                                                                                                                                                                                                                                                                                      | Germano de Sousa                                                                                                |                                                                                                                         | Instituto Nacional de Saude (INSA)                                                                                                                                                                                                  | Borges et al                                                                                                                                                                                                                                                                                                                                                                                                                                                                               |
| EPI_ISL_2340334,<br>EPI_ISL_2340355                                                                                                                                                                                                                                                                                                                                                                                                                                                                                                                                                                                                                                                                                                                                                                                                                                                                                                                                                                                                                                                                                                                                                                                                                                                                                                                                                                                                                                                                                                                                                                                                                                                                                                                                                                                                                                                                                                                                                                                                                                                                                                                                                                                                                                                                                                                                                                                                                  | Germano de Sousa                                                                                                |                                                                                                                         | Instituto Nacional de Saude (INSA) and BioSystems &<br>Integrative Sciences Institute (BioISI) Genomics Unit, FCUL                                                                                                                  | Borges et al                                                                                                                                                                                                                                                                                                                                                                                                                                                                               |
| EPI_ISL_1853560                                                                                                                                                                                                                                                                                                                                                                                                                                                                                                                                                                                                                                                                                                                                                                                                                                                                                                                                                                                                                                                                                                                                                                                                                                                                                                                                                                                                                                                                                                                                                                                                                                                                                                                                                                                                                                                                                                                                                                                                                                                                                                                                                                                                                                                                                                                                                                                                                                      | Germano de Sousa                                                                                                |                                                                                                                         | Instituto Nacional de Saude (INSA) and Instituto Gulbenkian<br>de Ciencia (IGC)                                                                                                                                                     | Borges et al                                                                                                                                                                                                                                                                                                                                                                                                                                                                               |
| EPI_ISL_960672                                                                                                                                                                                                                                                                                                                                                                                                                                                                                                                                                                                                                                                                                                                                                                                                                                                                                                                                                                                                                                                                                                                                                                                                                                                                                                                                                                                                                                                                                                                                                                                                                                                                                                                                                                                                                                                                                                                                                                                                                                                                                                                                                                                                                                                                                                                                                                                                                                       | Germano de sousa                                                                                                |                                                                                                                         | Instituto Gulbenkian de Ciencia                                                                                                                                                                                                     | Cathy Paulino; João Costa; João Sobral; Maria Costa; Ricardo Leite; Susana Ladeiro                                                                                                                                                                                                                                                                                                                                                                                                         |
| EPI_ISL_933769                                                                                                                                                                                                                                                                                                                                                                                                                                                                                                                                                                                                                                                                                                                                                                                                                                                                                                                                                                                                                                                                                                                                                                                                                                                                                                                                                                                                                                                                                                                                                                                                                                                                                                                                                                                                                                                                                                                                                                                                                                                                                                                                                                                                                                                                                                                                                                                                                                       | Gerontology Institute - Skopje                                                                                  |                                                                                                                         | Research Center for Genetic Engineering and Biotechnology<br>"Georgi D. Efremov" , Macedonian Academy of Sciences and<br>Arts                                                                                                       | RCGEB - MASA                                                                                                                                                                                                                                                                                                                                                                                                                                                                               |

|                                                                                                                                                                                                                                                                                                                                                                                |                                                                                                                                                                                                     |                                                                                                                                                                                                     |                                                                                                                                                                                                                                                                                                                                                                                                                                                                                                                                                                                                                                                                                                                                                                                                                                                                                                                              |
|--------------------------------------------------------------------------------------------------------------------------------------------------------------------------------------------------------------------------------------------------------------------------------------------------------------------------------------------------------------------------------|-----------------------------------------------------------------------------------------------------------------------------------------------------------------------------------------------------|-----------------------------------------------------------------------------------------------------------------------------------------------------------------------------------------------------|------------------------------------------------------------------------------------------------------------------------------------------------------------------------------------------------------------------------------------------------------------------------------------------------------------------------------------------------------------------------------------------------------------------------------------------------------------------------------------------------------------------------------------------------------------------------------------------------------------------------------------------------------------------------------------------------------------------------------------------------------------------------------------------------------------------------------------------------------------------------------------------------------------------------------|
| EPI_ISL_890188                                                                                                                                                                                                                                                                                                                                                                 | Gonoshasthaya-RNA Research Center, Gonoshasthaya-RNA Molecular Diagnostics and Research Center                                                                                                      | Gonoshasthaya-RNA Research Center, Gonoshasthaya-RNA Molecular Diagnostics and Research Center                                                                                                      | Adnan, N.; Ahmed; Akter, S.; Ali, T.; Azmda, N.; Chaity, M.; Haq; Jahan, N.; Jamiruddin; Jamiruddin, M.; Khandker; Khondoker; Liza; M.A.; M.F.; M.R.; M.U.; Marzan, M.; Mow; Nahar, S.; Oishee, M.; S.M.; S.S.; Sharif, N.; Sharmin, S.; T.J.                                                                                                                                                                                                                                                                                                                                                                                                                                                                                                                                                                                                                                                                                |
| EPI_ISL_774976                                                                                                                                                                                                                                                                                                                                                                 | Gonoshasthaya-RNA Molecular Diagnostic and Research Center                                                                                                                                          | Gonoshasthaya-RNA Molecular Diagnostic and Research Center                                                                                                                                          | Firoz Ahmed; Maha Jamiruddin; Mahfuza Marzan; Md. Ansanul Haq; Mohd. Raeed Jamiruddin; Mohib Ullah Khondoker; Mousumi Chaity; Mumtazinnat Oishee; Nafisa Azmda; Nihad Adnan; Nowshin Jahan; Salma Akter; Sayeda Moriam Liza; Shahad Saif Khandker; Shahana Sharmin; Tamanna Ali; Taslin Jahan Mou                                                                                                                                                                                                                                                                                                                                                                                                                                                                                                                                                                                                                            |
| EPI_ISL_496860, EPI_ISL_1225352, EPI_ISL_1225354, EPI_ISL_1225513, EPI_ISL_1225516, EPI_ISL_1225521, EPI_ISL_1225563, EPI_ISL_1225574, see above                                                                                                                                                                                                                               | Gorgas Memorial Laboratory of Health Studies                                                                                                                                                        | Gorgas Memorial Laboratory of Health Studies                                                                                                                                                        | EPI_ISL_1225577, EPI_ISL_1502846, EPI_ISL_1502915, EPI_ISL_1502937, EPI_ISL_1502983, EPI_ISL_1502997, EPI_ISL_1503020, EPI_ISL_1503114, EPI_ISL_1503116<br>Adriana Weeden; Alejandra Valoy; Alexander A Martinez; Alexander Martinez; Ambar Moreno; Anyuri Ortiz; Brechla Moreno; Castillo Jorge; Claudia Gonzalez; Claudia Gonzalez Sandra Lopez-Verges; Daniel Castillo; Danilo Franco; Davis Beltran; Dimelza Arauz; Elimelec Valdespino; Franco Danilo; Gonzalez Claudia; Gretel Vasquez; Ilka Guerra; Isela Guerrero; Jessica Gondola; Jim Chang; Juan Miguel Pascual; Layda Abrego; Leyda Abrego; Lisseth Saenz; Lopez-Verges Sandra; Mabel Martinez-Montero; Maria Chen-German; Marlene Castillo; Marlene Castillo; Martinez Alexander; Melissa Gaitan; Moreno Ambar; Moreno Brechla; Oris Chavarria; Oris Chavarria; Rita Corrales; Rita Rodriguez; Sandra Lopez-Verges; Yamiela Diaz; Yaneth Pitti; Zumara Chaverra |
| EPI_ISL_1302710, EPI_ISL_2602113, EPI_ISL_2614003, EPI_ISL_2985763                                                                                                                                                                                                                                                                                                             | Gravity Diagnostics, LLC                                                                                                                                                                            | Kentucky State Public Health Lab<br>Gravity Diagnostics, LLC                                                                                                                                        | Joshua Tobias; Karim George; Matthew Johnson; Rachel Zinner; Rhonda Lucas; Stephanie Lunn; Vaneet Arora; William Grooms<br>Gravity Diagnostics                                                                                                                                                                                                                                                                                                                                                                                                                                                                                                                                                                                                                                                                                                                                                                               |
| EPI_ISL_2301649, EPI_ISL_2301783, EPI_ISL_2369069, EPI_ISL_2371278                                                                                                                                                                                                                                                                                                             | Greek Genome Center, Biomedical Research Foundation of the Academy of Athens (BRFAA)                                                                                                                | Greek Genome Center, Biomedical Research Foundation of the Academy of Athens (BRFAA)                                                                                                                | Dimitrios Thanos; Emmanouil Athanasiadis; Giannis Vatsellas; Katerina Zoi; Theodoros Loupis                                                                                                                                                                                                                                                                                                                                                                                                                                                                                                                                                                                                                                                                                                                                                                                                                                  |
| EPI_ISL_1040654, EPI_ISL_1706573, EPI_ISL_2140691, EPI_ISL_2140704, EPI_ISL_2140712, EPI_ISL_2375973, EPI_ISL_2621054, EPI_ISL_2876955, see above                                                                                                                                                                                                                              | Groote Schuur Hospital wv GSH                                                                                                                                                                       | NHLS/JUCT                                                                                                                                                                                           | Arash Iranzadeh; Bruna Galvao; Carolyn Williamson; Deelan Doolabh; Diana Hardie; Emmanuel SJ; Gert Marais; Innocent Mudau; Kruger Marais; Lynn Tyers; Marvin Hsiao; Stephen Korsman; Tegally H; de Oliveira T                                                                                                                                                                                                                                                                                                                                                                                                                                                                                                                                                                                                                                                                                                                |
| EPI_ISL_2547418                                                                                                                                                                                                                                                                                                                                                                | Groote Schuur Hospital wv GSH                                                                                                                                                                       | National Health Laboratory Service/University of Cape Town (NHLS/JUCT)                                                                                                                              | Arash Iranzadeh; Bruna Galvao; Carolyn Williamson; Deelan Doolabh; Diana Hardie; Gert Marais; Innocent Mudau; Lynn Tyers; Marvin Hsiao; Stephen Korsman                                                                                                                                                                                                                                                                                                                                                                                                                                                                                                                                                                                                                                                                                                                                                                      |
| EPI_ISL_699059                                                                                                                                                                                                                                                                                                                                                                 | Group 42 (G42) Healthcare, Abu Dhabi, United Arab Emirates; Department of Health, The United Arab Emirates                                                                                          | G42 Healthcare                                                                                                                                                                                      | Ashish Koshy; Budoor Alqarni; Denghui Liu; Fang Chen; Hanif Khalak; Huanming Yang; Javier Quilez; Jian Wang; Junhua Li; Ke Liang; Long Lin; Mohammed Saifuddin Fasihuddin; Nan Qiao; Nawal Ahmed Mohamed Al Kaabi; Pauline Ogradzki; Pei Wu; Peng Xiao; Pengjuan Liu; Rong Liu; Sally Mahmoud; Siyang Liu; Stephen S. Francis; Tao Ma; Vinay Kusuma; Walid Abbas Zaher; Weibin Liu; Wenjun He; Xavier Anton; Xin jin; Xin Meng; Xinyu Huang; Xun Xu; Zhaorong Yuan                                                                                                                                                                                                                                                                                                                                                                                                                                                           |
| EPI_ISL_3033081                                                                                                                                                                                                                                                                                                                                                                | Grupo de Genómica y Bioinformática del Instituto de Investigación de la Cadena Láctea CONICET-INTA on behalf of 'Proyecto Argentino Interinstitucional de genómica de SARS-Cov-2' (PAIS Consortium) | Grupo de Genómica y Bioinformática del Instituto de Investigación de la Cadena Láctea CONICET-INTA on behalf of 'Proyecto Argentino Interinstitucional de genómica de SARS-Cov-2' (PAIS Consortium) | AF; Amadio; Eberhardt; Irazoqui; JM; MF                                                                                                                                                                                                                                                                                                                                                                                                                                                                                                                                                                                                                                                                                                                                                                                                                                                                                      |
| EPI_ISL_1824180, EPI_ISL_2339776, EPI_ISL_2339777, EPI_ISL_2339778, EPI_ISL_2339779, EPI_ISL_2339780, EPI_ISL_2339781, EPI_ISL_2339782, EPI_ISL_2339783, EPI_ISL_2339784, EPI_ISL_2339785, EPI_ISL_2339786, EPI_ISL_2339787, EPI_ISL_2339788, EPI_ISL_2339789, EPI_ISL_2339790, EPI_ISL_2339791, EPI_ISL_2339792, EPI_ISL_2339793, EPI_ISL_2339794, EPI_ISL_2603146, see above | Grupo de Investigación en Enfermedades Tropicales del Ejército (GINETEJ), Laboratorio de Referencia e Investigación, Dirección de Sanidad Ejército, Bogotá, Colombia                                | Centro de Investigaciones en Microbiología y Biotecnología-UR (CIMBIUR), Facultad de Ciencias Naturales, Universidad del Rosario, Bogotá, Colombia                                                  | Camilo A. Correa-Cárdenas; Carolina Oliveros; Claudia Méndez; Elizabeth K. Márquez; Frank de los Santos Ortiz; Juan David Ramírez; Julie Pérez; Lorena Albarracín; Luz H. Patiño; María Clara Duque; Marina Muñoz; María Teresa Alvarado; Nathalia Ballesteros; Sergio Castañeda; Sergio Gutierrez-Riveros; Yanira Romero; Zulma Cucunubá                                                                                                                                                                                                                                                                                                                                                                                                                                                                                                                                                                                    |
| EPI_ISL_1273073, EPI_ISL_1823585, EPI_ISL_2451659, EPI_ISL_2787627, EPI_ISL_2787642                                                                                                                                                                                                                                                                                            | Guam Public Health Laboratory                                                                                                                                                                       | Centers for Disease Control and Prevention Division of Viral Diseases, Pathogen Discovery                                                                                                           | Alison Laufer Halpin; Anna Montmayeur; Anna Uehara; Ben L. Rambo-Martin; Clinton R. Paden; Dakota Howard; Darlene Wagner; Dave Wentworth; Dhvani Batra; Haibin Wang; Jasmine Padilla; Jing Zhang; Justin Lee; Katie Dillon; Krista Queen; Kristen Knipe; Kristine Lacey; Lori Rowe; Mark Burroughs; Matthew Schmeier; Mili Sheth; Peter Cook; Peter W. Cook; Rachel Marine; Sam Shepard; Sarah Nobles; Shoshona Le; Suxiang Tong; Vivien Dugan; Yan Li; Ying Tao; Yvette Unoarumhi                                                                                                                                                                                                                                                                                                                                                                                                                                           |
| EPI_ISL_509701                                                                                                                                                                                                                                                                                                                                                                 | Guatemala Ministry of Public Health                                                                                                                                                                 | Pathogen Discovery, Respiratory Viruses Branch, Division of Viral Diseases, Centers for Disease Control and Prevention                                                                              | Anna Uehara; Clinton Paden; Haibin Wang; Jing Zhang; Krista Queen; Suxiang Tong; Yan Li; Ying Tao                                                                                                                                                                                                                                                                                                                                                                                                                                                                                                                                                                                                                                                                                                                                                                                                                            |
| EPI_ISL_547739, EPI_ISL_942722                                                                                                                                                                                                                                                                                                                                                 | Gundersen Molecular Diagnostics Laboratory                                                                                                                                                          | Kabara Cancer Research Institute                                                                                                                                                                    | Craig S. Richmond; Paraic A. Kenny                                                                                                                                                                                                                                                                                                                                                                                                                                                                                                                                                                                                                                                                                                                                                                                                                                                                                           |
| EPI_ISL_1853561                                                                                                                                                                                                                                                                                                                                                                | H Fernando Fonseca                                                                                                                                                                                  | Instituto Nacional de Saude (INSA) and Institute of Biomedicine (IBIMed), Universidade de Aveiro                                                                                                    | Borges et al                                                                                                                                                                                                                                                                                                                                                                                                                                                                                                                                                                                                                                                                                                                                                                                                                                                                                                                 |
| EPI_ISL_693535                                                                                                                                                                                                                                                                                                                                                                 | H Vila Franca Xira                                                                                                                                                                                  | Instituto Nacional de Saude (INSA)                                                                                                                                                                  | Borges et al                                                                                                                                                                                                                                                                                                                                                                                                                                                                                                                                                                                                                                                                                                                                                                                                                                                                                                                 |
| EPI_ISL_2695606, EPI_ISL_2709863                                                                                                                                                                                                                                                                                                                                               | HELEN JOSEPH                                                                                                                                                                                        | National Institute for Communicable Diseases of the National Health Laboratory Service                                                                                                              | Amoako DG; Bhiman JN; Everatt J; Ismail A; Mahlangu B; Mnguni A; Mohale T; Ntuli N; Scheepers C                                                                                                                                                                                                                                                                                                                                                                                                                                                                                                                                                                                                                                                                                                                                                                                                                              |
| EPI_ISL_2984814, EPI_ISL_2984893, EPI_ISL_3024595                                                                                                                                                                                                                                                                                                                              | HELEN JOSEPH LABORATORY                                                                                                                                                                             | National Institute for Communicable Diseases of the National Health Laboratory Service                                                                                                              | Amoako DG; Bhiman JN; Everatt J; Ismail A; Mahlangu B; Mnguni A; Mohale T; Ntuli N; Scheepers C                                                                                                                                                                                                                                                                                                                                                                                                                                                                                                                                                                                                                                                                                                                                                                                                                              |
| EPI_ISL_2385290, EPI_ISL_2523862, EPI_ISL_2899790                                                                                                                                                                                                                                                                                                                              | HELIX LLC                                                                                                                                                                                           | WHO National Influenza Centre Russian Federation                                                                                                                                                    | Andrey Komissarov; Artem Fadeev; Daria Danilenko; Dmitry Lioznov; Elena Nabieva; Georgii Bazzykin; Kirill Varchenko; Ksenia Safina; Kseniya Komissarova; Maria Pisareva; Maria Timofeeva; Mikhail Bakaev; Nikita Yolshin; Oula Mansour; Oula Masour; Tamila Musaeva; Veronika Eder                                                                                                                                                                                                                                                                                                                                                                                                                                                                                                                                                                                                                                           |
| EPI_ISL_1180745, EPI_ISL_1965453                                                                                                                                                                                                                                                                                                                                               | HG Pharma GmbH                                                                                                                                                                                      | Bergthaler laboratory, CeMM Research Center for Molecular Medicine of the Austrian Academy of Sciences                                                                                              | Andreas Bergthaler; Anna Schedl; Bekir Erguner; Benedikt Agerer; Christoph Bock; Fabian Amman; Jan Laine; Lukas Endler; Maelle Le Moing; Martin Senekowitsch; Michael Schuster; Petr Triska; Thomas Penz                                                                                                                                                                                                                                                                                                                                                                                                                                                                                                                                                                                                                                                                                                                     |
| EPI_ISL_955236                                                                                                                                                                                                                                                                                                                                                                 | HGR 1 VICENTE GUERRERO                                                                                                                                                                              | BIOBANCO / COCTI                                                                                                                                                                                    | Arias C.; Borja-Aburto VH; Grajales-Muñiz C.; Grande R; Isa P; López S; Muñoz-Medina JE; Ochoa Carrera LA; Rojas-Mendoza T; Santacruz Tinoco CE; Sánchez A; Taboada B                                                                                                                                                                                                                                                                                                                                                                                                                                                                                                                                                                                                                                                                                                                                                        |
| EPI_ISL_1805649                                                                                                                                                                                                                                                                                                                                                                | HIC                                                                                                                                                                                                 | Instituto Nacional de Salud - Dirección de Investigación en Salud Pública                                                                                                                           | Carlos Franco-Muñoz; Carmen Osorio; Diana Malo; Diego A. Álvarez-Díaz; Diego Andrés Prada; Gerardo Santamaría; Hector Alejandro Ruiz-Moreno; Jhonnatan Reales-González; Jorge Rivera; Juan Camilo Martínez; Julian Naizaque; Katherine Laiton-Donato; Lisseth Pardo; Magdalena Wiesner; Marcela Mercado-Reyes; María T. Herrera-Sepúlveda; Marta Lopez Blanco; Martha Lucia Ospina Martínez; Paola Rojas; Sergio Gomez; Sheryll Corchuelo; Ángela Alarcón Cruz                                                                                                                                                                                                                                                                                                                                                                                                                                                               |
| EPI_ISL_2484763, EPI_ISL_2484784, EPI_ISL_3019487, EPI_ISL_3019492                                                                                                                                                                                                                                                                                                             | HOME QUARANTINE TASKFORCE                                                                                                                                                                           | Hong Kong Department of Health                                                                                                                                                                      | Alan K.L. Tsang; Dominic N.C. Tsang; Edman T.K. Lam; Gannon C.K. Mak; Ken H.L. Ng; Peter C.W. Yip; Peter K.C. Cheng; Rickjason C.W. Chan                                                                                                                                                                                                                                                                                                                                                                                                                                                                                                                                                                                                                                                                                                                                                                                     |
| EPI_ISL_1940037                                                                                                                                                                                                                                                                                                                                                                | HOSAHALLI                                                                                                                                                                                           | inStem NCBS - INSACOG                                                                                                                                                                               | Uma Ramakrishnan Dasaradhi Palakodeti Aswin SaiNarain                                                                                                                                                                                                                                                                                                                                                                                                                                                                                                                                                                                                                                                                                                                                                                                                                                                                        |
| EPI_ISL_2209295                                                                                                                                                                                                                                                                                                                                                                | HOSP MUN DE MOGI DAS CRUZES PREF WALDEMAR COSTA FILHO                                                                                                                                               | Instituto Butantan / Mendelics                                                                                                                                                                      | Antonio Jorge Martins; Claudia Renata dos Santos Barros; David Schlesinger; Debora Botequão Moretti; Dimas Tadeu Covas; Elaine Cristina Marquize; Elaine Vieira Santos; Evandra Strazza Rodrigues; Heidge Fukumasu; Jayme Augusto de Souza-Neto; José Salvatore Leister Patané; Luiz Alcantara; Luiz Lehmann Coutinho; Maria Carolina Elias; Maurício Lacerda Nogueira; Rafael dos Santos Bezerra; Raul Machado Neto; Rejane Maria Tommasini Grotto; Ricardo Haddad; Sandra Couccuzzo Sampaio Vessoni; Simone Kashima; Svetoslav Nanev Slavov; Vincent Louis Viala                                                                                                                                                                                                                                                                                                                                                           |
| EPI_ISL_2272985                                                                                                                                                                                                                                                                                                                                                                | HOSPITAL CIUDAD NEILY                                                                                                                                                                               | Incienza, Instituto Costarricense de Investigación y Enseñanza en Nutrición y Salud                                                                                                                 | Adriana Godínez; Claudio Soto-Garita; Estela Cordero; Francisco Duarte; Hebleen Porras; Joselyn Prado & Raúl Zeledón-Mayorga; José Luis Vargas; Mariela Gutiérrez; Melany Calderón                                                                                                                                                                                                                                                                                                                                                                                                                                                                                                                                                                                                                                                                                                                                           |
| EPI_ISL_2103379, EPI_ISL_2103412, EPI_ISL_2272972                                                                                                                                                                                                                                                                                                                              | HOSPITAL DR. FERNANDO ESCALANTE PRADILLA                                                                                                                                                            | Incienza, Instituto Costarricense de Investigación y Enseñanza en Nutrición y Salud                                                                                                                 | Adriana Godínez; Caterina Guzmán; Claudio Soto-Garita; Estela Cordero; Francisco Duarte; Hebleen Porras; Joselyn Prado & María Fernanda Matamoros Ceciliano; José Luis Vargas; Mariela Gutiérrez; Mariela Gutiérrez; Joselyn Prado; Melany Calderón; Nazareth Ruiz & Joselyn Prado; Nazareth Ruiz & Lizzeth Blanco                                                                                                                                                                                                                                                                                                                                                                                                                                                                                                                                                                                                           |
| EPI_ISL_2103402                                                                                                                                                                                                                                                                                                                                                                | HOSPITAL DR. MAX TERAN VALLS                                                                                                                                                                        | Incienza, Instituto Costarricense de Investigación y Enseñanza en Nutrición y Salud                                                                                                                 | Adriana Godínez; Caterina Guzmán; Claudio Soto-Garita; Estela Cordero; Francisco Duarte; Hebleen Porras; Joselyn Prado; José Luis Vargas; Mariela Gutiérrez; Melany Calderón; Nazareth Ruiz & María José Gómez-Umaña                                                                                                                                                                                                                                                                                                                                                                                                                                                                                                                                                                                                                                                                                                         |
| EPI_ISL_3037832                                                                                                                                                                                                                                                                                                                                                                | HOSPITAL GUAPILES (POCOCI/LIMON)                                                                                                                                                                    | Incienza, Instituto Costarricense de Investigación y Enseñanza en Nutrición y Salud                                                                                                                 | Adriana Godínez; Caterina Guzmán; Claudio Soto-Garita; Estela Cordero; Francisco Duarte; Hebleen Porras; José Luis Vargas; Mariela Gutiérrez Joselyn Prado; Melany Calderón; Nazareth Ruiz & Cristian Pérez                                                                                                                                                                                                                                                                                                                                                                                                                                                                                                                                                                                                                                                                                                                  |
| EPI_ISL_2502729                                                                                                                                                                                                                                                                                                                                                                | HOSPITAL LA ANEXION                                                                                                                                                                                 | Incienza, Instituto Costarricense de Investigación y Enseñanza en Nutrición y Salud                                                                                                                 | Adriana Godínez; Claudio Soto-Garita; Estela Cordero; Francisco Duarte; Hebleen Porras; Jose Luis Vargas; Joselyn Prado & Ivanna Krize-Morún; Mariela Gutierrez; Melany Calderón                                                                                                                                                                                                                                                                                                                                                                                                                                                                                                                                                                                                                                                                                                                                             |
| EPI_ISL_3037842                                                                                                                                                                                                                                                                                                                                                                | HOSPITAL LA ANEXION [NICUYA/GUANACASTE]                                                                                                                                                             | Incienza, Instituto Costarricense de Investigación y Enseñanza en Nutrición y Salud                                                                                                                 | Adriana Godínez; Caterina Guzmán; Claudio Soto-Garita; Estela Cordero; Francisco Duarte; Hebleen Porras; José Luis Vargas; Mariela Gutiérrez Joselyn Prado; Melany Calderón; Nazareth Ruiz & Arnoldo Zamora                                                                                                                                                                                                                                                                                                                                                                                                                                                                                                                                                                                                                                                                                                                  |
| EPI_ISL_2657682, EPI_ISL_3037844                                                                                                                                                                                                                                                                                                                                               | HOSPITAL METROPOLITANO                                                                                                                                                                              | Incienza, Instituto Costarricense de Investigación y Enseñanza en Nutrición y Salud                                                                                                                 | Adriana Godínez; Caterina Guzmán; Claudio Soto-Garita; Estela Cordero; Francisco Duarte; Hebleen Porras; Joselyn Prado; José Luis Vargas; Mariela Gutiérrez; Mariela Gutiérrez Joselyn Prado; Melany Calderón; Nazareth Ruiz & Margarita Lee; Nazareth Ruiz & Margarita Lee-Lui                                                                                                                                                                                                                                                                                                                                                                                                                                                                                                                                                                                                                                              |
| EPI_ISL_2502746                                                                                                                                                                                                                                                                                                                                                                | HOSPITAL MEXICO                                                                                                                                                                                     | Incienza, Instituto Costarricense de Investigación y Enseñanza en Nutrición y Salud                                                                                                                 | Adriana Godínez; Claudio Soto-Garita; Estela Cordero; Francisco Duarte; Hebleen Porras; Jose Luis Vargas; Joselyn Prado & Juan Vilalobos; Mariela Gutierrez; Melany Calderón                                                                                                                                                                                                                                                                                                                                                                                                                                                                                                                                                                                                                                                                                                                                                 |
| EPI_ISL_1827515, EPI_ISL_2658274                                                                                                                                                                                                                                                                                                                                               | HOSPITAL MONSEÑOR SANABRIA                                                                                                                                                                          | Incienza, Instituto Costarricense de Investigación y Enseñanza en Nutrición y Salud                                                                                                                 | Adriana Godínez; Claudio Soto-Garita; Estela Cordero; Francisco Duarte; Hebleen Porras; Joselyn Prado & Andrea Moreno-Carvajal; Joselyn Prado & Javier Zárate-León; José Luis Vargas; Mariela Gutiérrez; Melany Calderón                                                                                                                                                                                                                                                                                                                                                                                                                                                                                                                                                                                                                                                                                                     |
| EPI_ISL_1261540, EPI_ISL_2674346                                                                                                                                                                                                                                                                                                                                               | HOSPITAL RAFAEL MENDEZ                                                                                                                                                                              | Instituto de Salud Carlos III                                                                                                                                                                       | A. Monzón; E; F. Casas; I. Jiménez; I. Cascales; M. Sandonis; P. Zaballos; S. Cuesta; S. Iglesias-Caballero; S. Pozo; S. Varona; V. Camarero; Vázquez-Morón                                                                                                                                                                                                                                                                                                                                                                                                                                                                                                                                                                                                                                                                                                                                                                  |
| EPI_ISL_2502741                                                                                                                                                                                                                                                                                                                                                                | HOSPITAL REGIONAL DE LA ORINOQUIA                                                                                                                                                                   | Instituto Nacional de Salud- Dirección de Investigación en Salud Pública                                                                                                                            | Carlos Franco-Muñoz; Carmen Osorio; Diana Malo; Diego A. Álvarez-Díaz; Diego Andrés Prada; Gerardo Santamaría; Hector Alejandro Ruiz-Moreno; Jhonnatan Reales-González; Jorge Rivera; Juan Camilo Martínez; Julian Naizaque; Katherine Laiton-Donato; Lisseth Pardo; Magdalena Wiesner; Marcela Mercado-Reyes; María T. Herrera-Sepúlveda; Marta Lopez Blanco; Martha Lucia Ospina Martínez; Paola Rojas; Sergio Gomez; Sheryll Corchuelo; Ángela Alarcón Cruz                                                                                                                                                                                                                                                                                                                                                                                                                                                               |
| EPI_ISL_2502741                                                                                                                                                                                                                                                                                                                                                                | HOSPITAL SAN FRANCISCO DE ASIS                                                                                                                                                                      | Incienza, Instituto Costarricense de Investigación y Enseñanza en Nutrición y Salud                                                                                                                 | Adriana Godínez; Claudio Soto-Garita; Estela Cordero; Francisco Duarte; Hebleen Porras; Jose Luis Vargas; Joselyn Prado & Adrián Fallas-Mora; Mariela Gutierrez; Melany Calderón                                                                                                                                                                                                                                                                                                                                                                                                                                                                                                                                                                                                                                                                                                                                             |
| EPI_ISL_2103406, EPI_ISL_2658278                                                                                                                                                                                                                                                                                                                                               | HOSPITAL SAN FRANCISCO DE ASIS                                                                                                                                                                      | Incienza, Instituto Costarricense de Investigación y Enseñanza en Nutrición y Salud                                                                                                                 | Adriana Godínez; Caterina Guzmán; Claudio Soto-Garita; Estela Cordero; Francisco Duarte; Hebleen Porras; Joselyn Prado & Juan Carlos Villalobos-Ugalde; José Luis Vargas; Mariela Gutiérrez; Melany Calderón; Nazareth Ruiz & Joselyn Prado                                                                                                                                                                                                                                                                                                                                                                                                                                                                                                                                                                                                                                                                                  |
| EPI_ISL_2502753, EPI_ISL_2502760, EPI_ISL_2502761,                                                                                                                                                                                                                                                                                                                             | HOSPITAL SAN JUAN DE DIOS                                                                                                                                                                           | Incienza, Instituto Costarricense de Investigación y Enseñanza en Nutrición y Salud                                                                                                                 | Adriana Godínez; Claudio Soto-Garita; Estela Cordero; Francisco Duarte; Hebleen Porras; Jose Luis Vargas; Joselyn Prado & Marco Cháves-Otárola; Mariela Gutierrez; Melany Calderón                                                                                                                                                                                                                                                                                                                                                                                                                                                                                                                                                                                                                                                                                                                                           |

|                                                                                                                                                                                                                                                                                                                                                                     |                                                                                                                                                                                                                                                                        |                                                                                                                                                                                                                                                                                                                 |                                                                                                                                                                                                                                                                                                                                                                                                                                                                                                                                                                                                                                                                                                                                                                                                                                                                                                                                                                                                                                                                                                                                                                                                                                                      |
|---------------------------------------------------------------------------------------------------------------------------------------------------------------------------------------------------------------------------------------------------------------------------------------------------------------------------------------------------------------------|------------------------------------------------------------------------------------------------------------------------------------------------------------------------------------------------------------------------------------------------------------------------|-----------------------------------------------------------------------------------------------------------------------------------------------------------------------------------------------------------------------------------------------------------------------------------------------------------------|------------------------------------------------------------------------------------------------------------------------------------------------------------------------------------------------------------------------------------------------------------------------------------------------------------------------------------------------------------------------------------------------------------------------------------------------------------------------------------------------------------------------------------------------------------------------------------------------------------------------------------------------------------------------------------------------------------------------------------------------------------------------------------------------------------------------------------------------------------------------------------------------------------------------------------------------------------------------------------------------------------------------------------------------------------------------------------------------------------------------------------------------------------------------------------------------------------------------------------------------------|
| EPI_ISL_2502762<br>EPI_ISL_682245,<br>EPI_ISL_2657687,<br>EPI_ISL_2827974                                                                                                                                                                                                                                                                                           | HOSPITAL SAN JUAN DE DIOS                                                                                                                                                                                                                                              | Incienza, Instituto Costarricense de Investigación y Enseñanza en Nutrición y Salud                                                                                                                                                                                                                             | Adriana Godínez & Melany Calderon; Adriana Godínez; Claudio Soto-Garita; Estela Cordero; Francisco Duarte; Hebleen Porras; Joselyn Prado & Marco Chaves-Otárola; Joselyn Prado & Paola Sánchez; José Luis Vargas; Mariela Gutiérrez; Melany Calderón                                                                                                                                                                                                                                                                                                                                                                                                                                                                                                                                                                                                                                                                                                                                                                                                                                                                                                                                                                                                 |
| EPI_ISL_1510697,<br>EPI_ISL_2331700<br>EPI_ISL_682265                                                                                                                                                                                                                                                                                                               | HOSPITAL UNIVERSITARIO INSULAR DE GRAN CANARIA                                                                                                                                                                                                                         | Instituto de Salud Carlos III                                                                                                                                                                                                                                                                                   | A. Monzón; ARACELI; CRISTOBAL; F. Casas; I. Jiménez; I.DEL ROSARIO QUINTANA; I.HERNANDEZ BETANCOR; M. Sandonis; P. Zaballo; S. Cuesta; S. Iglesias-Caballero; S. Pozo; S. Varona; V. Camarero; Vázquez-Morón                                                                                                                                                                                                                                                                                                                                                                                                                                                                                                                                                                                                                                                                                                                                                                                                                                                                                                                                                                                                                                         |
| EPI_ISL_636975<br>EPI_ISL_412971                                                                                                                                                                                                                                                                                                                                    | HP Pemba<br>HUS Diagnostiikkakeskus, Hallinto                                                                                                                                                                                                                          | KRISP, KZN Research Innovation and Sequencing Platform<br>Department of Virology Faculty of Medicine, Medicum University of Helsinki                                                                                                                                                                            | Adriana Godínez & Melany Calderon; Claudio Soto-Garita; Estela Cordero; Francisco Duarte; Hebleen Porras<br>Giandhari J.; Ismael N.; Nadia Siteo; Nedio Mabunda; Paulo Arnaldo; Pillay S.; Tegally H.; Wilkinson E.; de Oliveira T Hannimari Kallio-Kokko; Olli Vapalahti; Suvi Kuivanen; Teemu Smura                                                                                                                                                                                                                                                                                                                                                                                                                                                                                                                                                                                                                                                                                                                                                                                                                                                                                                                                                |
| EPI_ISL_2193710<br>EPI_ISL_2096776,<br>EPI_ISL_2096885<br>EPI_ISL_615105<br>EPI_ISL_2333091                                                                                                                                                                                                                                                                         | Hackensack Medical Center<br>Hadassah Medical Center Clinical Virology Laboratory, Hadassah Ein Kerem<br>Halmstad klinisk mikrobiologi<br>Haugesund Hospital, laboratory for Medical Microbiology                                                                      | New York Genome Center<br>Hadassah Hebrew University Viral Sequencing Group, Hadassah Hebrew University Medical Center<br>The Public Health Agency of Sweden<br>Norwegian Institute of Public Health, Department of Virology                                                                                    | Andre Corvelo; Barry Kreiswirth; David Perlin; Dayna M. Oschwald; Jose Mediavilla; Kaelea Composto; Kar Chow; Liang Chen; Marcus Cunningham; Michael Zody; Samantha Fennessey; Tom Maniatis<br>Dana G. Wolf; Esther Oiknine-Djian; Hadar Golan Berman; Mila Rivkin; Sheera Adar<br>Anna Risberg; Anna-Malin Linde; Karin Tegmark-Wisell; Maria Lind Karlberg; Mattias Haukland; Mia Brytting; Olov Svartstrom; Oskar Karlsson Lindsjö; Petra Edquist; Reza Advani; Sandra Brodsson<br>Atiya R Ali; Debech Nadia; Engebretsen Serina Beate; García Llorente Ignacio; Hilde Elshaug; Hilde Vollan; Jon Bråte; Kamilla Heddeland Instefjord; Karoline Bragstad; Kathrine Stene-Johansen; Line Victoria Moen; Marie Paulsen Madsen; Olav Hungnes; Pedersen Benedikte Nevjen; Rasmus Riis Kopperud                                                                                                                                                                                                                                                                                                                                                                                                                                                        |
| EPI_ISL_1318065,<br>EPI_ISL_2333443<br>EPI_ISL_2938119<br>EPI_ISL_2938097                                                                                                                                                                                                                                                                                           | Haukeland University Hospital, Dept. of Microbiology<br>Health Center Novi Grad Sarajevo<br>Health Center Velika Kladuša                                                                                                                                               | Norwegian Institute of Public Health, Department of Virology<br>Clinical Center, University of Sarajevo; Unit for Clinical Microbiology<br>Clinical Center, University of Sarajevo; Unit for Clinical Microbiology                                                                                              | *Kathrine Stene-Johansen; Atiya R Ali; Debech Nadia; Engebretsen Serina Beate; García Llorente Ignacio; Hilde Elshaug; Hilde Vollan; Jon Bråte; Kamilla Heddeland Instefjord; Karoline Bragstad; Kathrine Stene-Johansen; Line Victoria Moen; Marie Paulsen Madsen; Olav Hungnes; Pedersen Benedikte Nevjen; Rasmus Riis Kopperud<br>Amela Dedeić-Ljubović; Edina Zahirović; Irma Salimović-Bešić; Sandra Vegar-Zubović; Sebija Izetbegović<br>Amela Dedeić-Ljubović; Edina Zahirović; Irma Salimović-Bešić; Sandra Vegar-Zubović; Sebija Izetbegović                                                                                                                                                                                                                                                                                                                                                                                                                                                                                                                                                                                                                                                                                                |
| EPI_ISL_2080427,<br>EPI_ISL_2469286<br>EPI_ISL_2004109,<br>EPI_ISL_2004111,<br>EPI_ISL_2689834,<br>EPI_ISL_2712906<br>EPI_ISL_796015                                                                                                                                                                                                                                | Health Services Laboratories<br>Health sciences Department, Universidad Técnica Particular de Loja<br>Hebei Provincial Center for Disease Control and Prevention, Shijiazhuang, Hebei Province; National Institute for Viral Disease Control and Prevention, China CDC | Wellcome Sanger Institute for the COVID-19 Genomics UK (COG-UK) Consortium<br>Institute of Microbiology, Universidad San Francisco de Quito<br>Hebei Provincial Center for Disease Control and Prevention, Shijiazhuang, Hebei Province; National Institute for Viral Disease Control and Prevention, China CDC | Cordelia Langford; David K. Jackson; Dominic Kwiatkowski; Ewan Harrison; Health Services Laboratories and Alex Alderton; Ian Johnston; Jeffrey Barrett; John Sillitoe on behalf of the Wellcome Sanger Institute COVID-19 Surveillance Team; Roberto Amato; Sonia Goncalves<br>Belén Prado-Vivar; Bernardo Gutiérrez; Danilo Sosa; Fernanda Zurita; Fernando Serrano; Gabriel Trueba; Juan José Guadalupe; Katty Ojeda; Michelle Grunauer; Monica Becerra-Wong; Paola Dalgo; Patricio Rojas-Silva; Paúl Cárdenas; Rita Rodriguez; Rommel Guevara; Sully Márquez; Verónica Barragán<br>George F. Gao; Nankun Liu; Qi Li; Shunxiang Qi; Wenbo Xu; Xiang Zhao; Yang Song                                                                                                                                                                                                                                                                                                                                                                                                                                                                                                                                                                                |
| EPI_ISL_640018<br>EPI_ISL_700598,<br>EPI_ISL_2877001<br>EPI_ISL_1088823                                                                                                                                                                                                                                                                                             | Heidelberg Clinic hc WBC<br>Heideveld Emergency Centre<br>Helix // Illumina                                                                                                                                                                                            | NHLS/UCT<br>NHLS/UCT<br>Respiratory Viruses Branch, Division of Viral Diseases, Centers for Disease Control and Prevention                                                                                                                                                                                      | Arash Iranzadeh; Bruna Galvao; Carolyn Williamson; Deelan Doolabh; Diana Hardie; Innocent Mudau; Kruger Marais; Lynn Tyers; Marvin Hsiao; Stephen Korsman<br>Arash Iranzadeh; Bruna Galvao; Carolyn Williamson; Deelan Doolabh; Diana Hardie; Gert Marais; Innocent Mudau; Kruger Marais; Lynn Tyers; Marvin Hsiao; Stephen Korsman<br>Alexandre Bolze; Ary Ascencio; Ben L. Rambo-Martin; Brad Sickler; Charlotte Rivera-García; Christine Tran; Clinton R. Paden; Dakota Howard; David Becker; Dhvani Batra; Duncan MacCannell; Efren Sandoval; Eileen de Feo; Elizabeth Cirulli; Eric Allen; Geraint Levan; James Lu; Jan Antico; Jason Nguyen; Jimmy Ramirez; Jingtao Liu; Kelly Schiabor Barrett; Kim Gietzen; Magnus Isaksson; Marc Laurent; Matthew Tolentino; Nicole L. Washington; Peter W. Cook; Phil Febbo; Ryan Cho; Shannon Wickline; Sherry Wang; Simon White; Summer Galloway; Suxiang Tong; Tyler Cassens; William Lee                                                                                                                                                                                                                                                                                                               |
| EPI_ISL_1269377, EPI_ISL_1270167, EPI_ISL_1443915, EPI_ISL_1924266, EPI_ISL_2159579, EPI_ISL_2268352, EPI_ISL_2269936, EPI_ISL_2269998, EPI_ISL_2320596, EPI_ISL_2598842                                                                                                                                                                                            | see above<br>Helix/Illumina                                                                                                                                                                                                                                            | Centers for Disease Control and Prevention Division of Viral Diseases, Pathogen Discovery                                                                                                                                                                                                                       | Adrian Paskey; Alexandre Bolze; Ary Ascencio; Ben L. Rambo-Martin; Benjamin Rambo-Martin; Brad Sickler; Charlotte Rivera-García; Christine Tran; Christopher Gulvick; Clinton R. Paden; Dakota Howard; Darlene Wagner; David Becker; Dhvani Batra; Duncan MacCannell; Efren Sandoval; Eileen de Feo; Elizabeth Cirulli; Eric Allen; Geraint Levan; James Lu; Jan Antico; Jason Caravas; Jason Nguyen; Jimmy Ramirez; Jingtao Liu; Kara Moser; Kelly Schiabor Barrett; Kim Gietzen; Magnus Isaksson; Marc Laurent; Matthew Schmerer; Matthew Tolentino; Nicole L. Washington; Peter W. Cook; Phil Febbo; Ryan Cho; Scott Sammons; Shannon Wickline; Shatabia Morrison; Sherry Wang; Simon White; Summer Galloway; Suxiang Tong; Tyler Cassens; William Lee; Yvette Unoarumhi                                                                                                                                                                                                                                                                                                                                                                                                                                                                          |
| EPI_ISL_1036688,<br>EPI_ISL_1036697                                                                                                                                                                                                                                                                                                                                 | Helix/Illumina                                                                                                                                                                                                                                                         | Respiratory Viruses Branch, Division of Viral Diseases, Centers for Disease Control and Prevention                                                                                                                                                                                                              | Alexandre Bolze; Ary Ascencio; Ben L. Rambo-Martin; Brad Sickler; Charlotte Rivera-García; Christine Tran; Clinton R. Paden; Dakota Howard; David Becker; Dhvani Batra; Duncan MacCannell; Efren Sandoval; Eileen de Feo; Elizabeth Cirulli; Eric Allen; Geraint Levan; James Lu; Jan Antico; Jason Nguyen; Jimmy Ramirez; Jingtao Liu; Kelly Schiabor Barrett; Kim Gietzen; Magnus Isaksson; Marc Laurent; Matthew Tolentino; Nicole L. Washington; Peter W. Cook; Phil Febbo; Ryan Cho; Shannon Wickline; Sherry Wang; Simon White; Summer Galloway; Suxiang Tong; Tyler Cassens; William Lee                                                                                                                                                                                                                                                                                                                                                                                                                                                                                                                                                                                                                                                      |
| EPI_ISL_2367588<br>EPI_ISL_2617410                                                                                                                                                                                                                                                                                                                                  | Hellenic National Blood Transfusion Center - EKEA<br>Hellenic National Blood Transfusion Center - EKEA                                                                                                                                                                 | Greek Genome Center, Biomedical Research Foundation of the Academy of Athens (BRFAA)<br>Greek Genome Center, Biomedical Research Foundation of the Academy of Athens (BRFAA)                                                                                                                                    | Dimitrios Thanos; Efthimia Petinaki; Emmanouil Athanasiadis; Giannis Vatsellas; Katerina Zoi; Kostas Stamoulis; Theodoros Loupis<br>Dimitrios Thanos; Efthimia Petinaki; Emmanouil Athanasiadis; Giannis Vatsellas; Katerina Zoi; Kostas Stamoulis; Theodoros Loupis                                                                                                                                                                                                                                                                                                                                                                                                                                                                                                                                                                                                                                                                                                                                                                                                                                                                                                                                                                                 |
| EPI_ISL_501235<br>EPI_ISL_430469                                                                                                                                                                                                                                                                                                                                    | Hellenic Pasteur Institute, National Influenza Reference laboratory of Southern Greece & Unit of Bioinformatics and Applied Genomics<br>Hellenic Pasteur Institute, Public Health Laboratories                                                                         | Hellenic Pasteur Institute, National Influenza Reference laboratory of Southern Greece & Unit of Bioinformatics and Applied Genomics<br>Hellenic Pasteur Institute, Public Health Laboratories, Unit of Bioinformatics and Applied Genomics                                                                     | Andreas Mentis; Androniki Voulgari-Kokota; Antonios Kalliaropoulos; Aspasia Kontou; Athanasios Kossyvakis; Evangelidou Maria; Horefti Elina; Timokratis Karamitros; Vasiliki Pogka<br>Andreas Mentis; Androniki Voulgari-Kokota; Antonios Kalliaropoulos; Aspasia Kontou; Athanasios Kossyvakis; Evangelidou Maria; Horefti Elina; Timokratis Karamitros; Vasiliki Pogka                                                                                                                                                                                                                                                                                                                                                                                                                                                                                                                                                                                                                                                                                                                                                                                                                                                                             |
| EPI_ISL_450529<br>EPI_ISL_451654,<br>EPI_ISL_906752                                                                                                                                                                                                                                                                                                                 | Hematology Laboratory, Section of Molecular Diagnostics, University Clinical Centre, Medical University of Gdansk<br>Hematology Laboratory, Section of Molecular Diagnostics, University Clinical Centre, Medical University of Gdansk                                 | Department of Virology, Faculty of Medicine, University of Helsinki, Helsinki, Finland<br>Laboratory of Recombinant Vaccines                                                                                                                                                                                    | Aneta Szulc; Maciej Grzybek; Marlena Robakowska; Olli Vapalahti; Teemu Smura<br>Adam Sodoi; Aneta Szulc; Boguslaw Szewczyk; Ewa Milosz; Krystyna Bienkowska-Szewczyk; Krzysztof Lewandowski; Lukasz Rabalski; Maciej Grzybek; Maciej Kosinski; Marlena Robakowska                                                                                                                                                                                                                                                                                                                                                                                                                                                                                                                                                                                                                                                                                                                                                                                                                                                                                                                                                                                    |
| EPI_ISL_700262<br>EPI_ISL_2140721<br>EPI_ISL_2812851,<br>EPI_ISL_2828084,<br>EPI_ISL_3015123                                                                                                                                                                                                                                                                        | Hematopathology Laboratory, ACTREC, TMC<br>Hillside Clinic wc BFW<br>Histopath                                                                                                                                                                                         | Hematopathology Laboratory, ACTREC, TMC<br>NHLS/UCT<br>NSW Health Pathology - Institute of Clinical Pathology and Medical Research; Westmead Hospital; University of Sydney                                                                                                                                     | ACTREC; Hematopathology Laboratory<br>Arash Iranzadeh; Bruna Galvao; Carolyn Williamson; Deelan Doolabh; Diana Hardie; Innocent Mudau; Kruger Marais; Lynn Tyers; Marvin Hsiao; Stephen Korsman<br>CIDM-PH et al.                                                                                                                                                                                                                                                                                                                                                                                                                                                                                                                                                                                                                                                                                                                                                                                                                                                                                                                                                                                                                                    |
| EPI_ISL_2779330,<br>EPI_ISL_2779346<br>EPI_ISL_1257882<br>EPI_ISL_1257892                                                                                                                                                                                                                                                                                           | Homabay County Referral Hospital<br>Hopital Général de Douala<br>Hopital Laquintinie de Douala                                                                                                                                                                         | USAMRD-A, Basic Science Laboratory<br>Institut Pasteur de Dakar<br>Institut Pasteur de Dakar                                                                                                                                                                                                                    | Alan Lemtudo; Beth Mutai; Brian Andika; Carol Kifude; Clement Masakwe; Eric Muthanje; Esther Omuseni; Faith Sigei; Gathii Kimita; George Awinda; John Waitumbi; Josphat Nyataya; Rachel Githii; Rehema Liyai; Stephen Ochola<br>Dia Ndong; Diagne Moussa Moïse; Diallo Amadou; Diop Mamadou; Elisabeth Carniel; Faye Ousmane; Loucoubar Cheikh; Njoum Richard; Sall Amadou Alpha; Sankhe Safietou<br>Dia Ndong; Diagne Moussa Moïse; Diallo Amadou; Diop Mamadou; Elisabeth Carniel; Faye Ousmane; Loucoubar Cheikh; Njoum Richard; Sall Amadou Alpha; Sankhe Safietou                                                                                                                                                                                                                                                                                                                                                                                                                                                                                                                                                                                                                                                                               |
| EPI_ISL_1821607, EPI_ISL_2029952, EPI_ISL_2029977, EPI_ISL_2188319, EPI_ISL_2188320, EPI_ISL_2293517, EPI_ISL_2374409, EPI_ISL_2462905, EPI_ISL_2462927, EPI_ISL_2464242, EPI_ISL_2628279, EPI_ISL_2757663, EPI_ISL_2757673, EPI_ISL_2757678, EPI_ISL_2790847, EPI_ISL_2835879, EPI_ISL_2835906, EPI_ISL_2835967, EPI_ISL_3031652, EPI_ISL_3031654, EPI_ISL_3031655 | see above<br>Hospital                                                                                                                                                                                                                                                  | National Reference Centre for Viruses of Respiratory Infections, Institut Pasteur, Paris                                                                                                                                                                                                                        | Alexandra Ducancell; Angela Brisebarre; Antoine Talarmin; Camille Capel; Ch De Cornouaille; Christophe Malabat; Clémence Guillaume; Corinne Maufrais; Damien Mornico; Didier Matter; Emmanuelle Permal; Etienne Simon-Lorière; Frédéric Lemoine; Hub de Bioinformatique et Biostatistique; Jérôme Durivault; L. Courdavault; Louise Lefrançois; LéA Pilorge; Marianne Coste-Burel; Marianne Burgard; Marion Barbet; Maud Vanpeene; Méline Bizard; Patricia Barbut; Sylviane Bastian; Sylvie Behillil; Sylvie Van der Werf; Victoire Baillet; Vincent Enouf                                                                                                                                                                                                                                                                                                                                                                                                                                                                                                                                                                                                                                                                                           |
| EPI_ISL_1917304<br>EPI_ISL_770028                                                                                                                                                                                                                                                                                                                                   | Hospital Center Emile Mayrisch<br>Hospital Dr. Raul Blanco Cervantes                                                                                                                                                                                                   | Laboratoire national de sante, Microbiology, Microbial Genomics Platform<br>Incienza, Instituto Costarricense de Investigación y Enseñanza en Nutrición y Salud                                                                                                                                                 | Anke Wienecke-Baldacchino; Catherine Ragimbeau; Cynthia Oxacelay; Fatu Djabi; Jessica Tapp; Lise Pignon; Raoul Salmon; Tamir Abdelrahman<br>Adriana Godínez; Claudio Soto-Garita; Estela Cordero; Francisco Duarte; Hebleen Porras; Melany Calderón & Mariel López                                                                                                                                                                                                                                                                                                                                                                                                                                                                                                                                                                                                                                                                                                                                                                                                                                                                                                                                                                                   |
| EPI_ISL_2965560,<br>EPI_ISL_2965569,<br>EPI_ISL_2965583,<br>EPI_ISL_2965584<br>EPI_ISL_1647957,<br>EPI_ISL_2483973<br>EPI_ISL_467234,<br>EPI_ISL_541903,<br>EPI_ISL_780044,<br>EPI_ISL_780047<br>EPI_ISL_2014355                                                                                                                                                    | Hospital Español<br>Hospital General Universitario Gregorio Marañón<br>Hospital General Universitario Gregorio Marañón<br>Hospital General Universitario Gregorio Marañón<br>Hospital Herrera Llerandi                                                                 | Centro de Innovación en Vigilancia Epidemiológica (CIVE), Institut Pasteur Montevideo, Uruguay<br>Hospital General Universitario Gregorio Marañón<br>SeqCOVID-SPAIN consortium/IBV(CSIC)<br>Asociación de Salud Integral/Clinica Familiar Luis Ángel García                                                     | Alicia Costáble; Alvaro Fajardo; Ana Moller; Andrés Lizasoain; Belén González; Bernardina Rivera; Cecilia Alonso; Cecilia Salazar; Gonzalo Bello; Gonzalo Moratorio; Gregorio Iraola; Henry Albornoz; Ignacio Ferrés; Javier Hurtado; Juan Zanetti; Julio Medina; Luciana Grifero; Lucía Spangenberg; Ma Noel Bontancor; Ma Pia Techera; Mailen Arce; Martina Alonso; Matias Maidana; Mauricio Méndez; Melissa Duquío; Mercedes Paz; Natalia Rego; Natalia Reyes; Nicolas Nin; Odhille Chappos; Paula Perbolianachis; Pilar Moreno; Rodney Colina; Rodrigo Arce; Tamara Fernández-Calero; Tania Possi; Veronica Noya; Viviana Bortagaray<br>Cristina Rodriguez-Grande; Darío García de Viedma; Julia Suárez; Laura Pérez-Lago; Marta Herranz Martín; Patricia Muñoz; Pedro Sola Campoy; Pilar Catalán; Sergio Buenestado Serrano; Victor Manuel de la Cueva<br>Darío García de Viedma; Darío García de Viedma and SeqCOVID-SPAIN consortium; Jon Sicilia; Julia Suárez; Laura Pérez-Lago; Marta Herranz; Patricia Muñoz; Patricia Muñoz and SeqCOVID-SPAIN consortium; Pilar Catalán<br>Ana S. Gonzalez-Reiche; Claudia Rangel; Danicela Mercado; Eduardo Arathoon; Hilda Ruiz; Luis Aguirre; Luis Rivas; Narda Medina; Oscar Bonilla; Osmar Gamboa. |
| EPI_ISL_769992<br>EPI_ISL_480327                                                                                                                                                                                                                                                                                                                                    | Hospital Metropolitano<br>Hospital Nacional de Niños                                                                                                                                                                                                                   | Incienza, Instituto Costarricense de Investigación y Enseñanza en Nutrición y Salud<br>Charité Virology-University of Costa Rica                                                                                                                                                                                | Adriana Godínez; Claudio Soto-Garita; Estela Cordero; Francisco Duarte; Hebleen Porras; Melany Calderón & Margarita Lee Lui<br>Andrei Montero Bonilla; Andres Moreira-Soto; Cristian Pérez Corrales; Eugenia Corrales-Agular; Ignacio Postigo-Hidalgo; Jan Felix Drexler                                                                                                                                                                                                                                                                                                                                                                                                                                                                                                                                                                                                                                                                                                                                                                                                                                                                                                                                                                             |

|                                                                                                                                                                                                                                                                                                                                                                                                                                                              |                                                                                                                                                                                                                    |                                                                                                                                                                                                                                                                                                                                                                             |                                                                                                                                                                                                                                                                                                                                                                                                                                                                                                                                                                                                                                                                                                                                                                                                                                                                                                                                                                                                                                                                                                                                                             |
|--------------------------------------------------------------------------------------------------------------------------------------------------------------------------------------------------------------------------------------------------------------------------------------------------------------------------------------------------------------------------------------------------------------------------------------------------------------|--------------------------------------------------------------------------------------------------------------------------------------------------------------------------------------------------------------------|-----------------------------------------------------------------------------------------------------------------------------------------------------------------------------------------------------------------------------------------------------------------------------------------------------------------------------------------------------------------------------|-------------------------------------------------------------------------------------------------------------------------------------------------------------------------------------------------------------------------------------------------------------------------------------------------------------------------------------------------------------------------------------------------------------------------------------------------------------------------------------------------------------------------------------------------------------------------------------------------------------------------------------------------------------------------------------------------------------------------------------------------------------------------------------------------------------------------------------------------------------------------------------------------------------------------------------------------------------------------------------------------------------------------------------------------------------------------------------------------------------------------------------------------------------|
| EPI_ISL_471270<br>EPI_ISL_524463                                                                                                                                                                                                                                                                                                                                                                                                                             | Hospital Oncológico Solca Núcleo de Quito<br>Hocológico Regional de Cotia                                                                                                                                          | Institute of Microbiology, Universidad San Francisco de Quito<br>Instituto Adolfo Lutz, Interdisciplinary Procedures Center,<br>Strategic Laboratory                                                                                                                                                                                                                        | Belén Prado-Vivar; Bernardo Gutiérrez; Gabriel Trueba; Grace Salazar; Juan José Guadalupe; Marcos Di Stefano; Michelle Grunauer; Patricio Rojas-Silva; Paúl Cárdenas; Sully Márquez; Verónica Barragán<br>Claudia Regina Gonçalves; Claudio Tavares Sacchi; Erica Valessa Ramos Gomes                                                                                                                                                                                                                                                                                                                                                                                                                                                                                                                                                                                                                                                                                                                                                                                                                                                                       |
| EPI_ISL_491452                                                                                                                                                                                                                                                                                                                                                                                                                                               | Hospital San Rafael de Alajuela                                                                                                                                                                                    | Incienza, Instituto Costarricense de Investigación y<br>Enseñanza en Nutrición y Salud                                                                                                                                                                                                                                                                                      | Adriana Godínez & Melany Calderon; Claudio Soto-Garita; Estela Cordero; Francisco Duarte; Hebleen Brenes                                                                                                                                                                                                                                                                                                                                                                                                                                                                                                                                                                                                                                                                                                                                                                                                                                                                                                                                                                                                                                                    |
| EPI_ISL_2982423                                                                                                                                                                                                                                                                                                                                                                                                                                              | Hospital Universitari Arnau de Vilanova                                                                                                                                                                            | Hospital Universitari Vall d'Hebron - Vall d'Hebron Institut de<br>Recerca                                                                                                                                                                                                                                                                                                  | Alejandra González-Sánchez; Andrés Antón; Ariadna Rando; Carla Castillo; Cristina Andrés; Damir Garcia-Cehic; Josep Quer; Juliana Esperalba; Karen García; María Carmen Martín; María Gema Codina; María Piñana; Rodrigo Vásquez; Tomàs Pumarola                                                                                                                                                                                                                                                                                                                                                                                                                                                                                                                                                                                                                                                                                                                                                                                                                                                                                                            |
| EPI_ISL_2516574<br>EPI_ISL_3009987                                                                                                                                                                                                                                                                                                                                                                                                                           | Hospital Universitari Bellvitge<br>Hospital Universitari Vall d'Hebron - Vall d'Hebron Institut de<br>Recerca                                                                                                      | Microbiology Department<br>Hospital Universitari Vall d'Hebron - Vall d'Hebron Institut de<br>Recerca                                                                                                                                                                                                                                                                       | Aida Gonzalez-Diaz; Carmen Ardanuy; Jordi Camara; Jordi Niubó; Laura Calatayud; M Angeles Domínguez; Miquel Fernandez-Huerta; Sara Martí<br>Alejandra González-Sánchez; Andrés Antón; Ariadna Rando; Carla Castillo; Cristina Andrés; Damir Garcia-Cehic; Josep Quer; Juliana Esperalba; Karen García; María Carmen Martín; María Gema Codina; María Piñana; Rodrigo Vásquez; Tomàs Pumarola                                                                                                                                                                                                                                                                                                                                                                                                                                                                                                                                                                                                                                                                                                                                                                |
| EPI_ISL_691687<br>EPI_ISL_1470312<br>EPI_ISL_455314<br>EPI_ISL_671815                                                                                                                                                                                                                                                                                                                                                                                        | Hospital Universitario de Ceuta<br>Hospital Universitario de Gran Canaria Dr. Negrín<br>Hospital Virgen del Rocío<br>Hospital de la Santa Creu i Sant Pau. Servicio de<br>Microbiología                            | Instituto de Salud Carlos III<br>SeqCOVID-SPAIN consortium/IBV(CSIC)<br>Hospital de Salud Carlos III<br>SeqCOVID-SPAIN consortium/IBV(CSIC)                                                                                                                                                                                                                                 | A. Monzón; F. Casas; I. Hijano, S.; I. Jiménez; Iglesias-Caballero; M. Camarero; M. Cuesta; M. González-Esguevillas; M. Pozo; M. Zaballos; P. Jiménez; S. Juliá; S. Molinero Calamita; S. Varona<br>Ana Bordes Benítez and SeqCOVID-SPAIN consortium; Francisco J. Chamizo López; M. Carmen Pérez González<br>A. Monzón; F. Casas; I. J. Jiménez; Iglesias-Caballero; J. Lepe; M. Camarero; M. Cuesta; M. González-Esguevillas; M. Molinero Calamita; M. Zaballos; P. Jiménez; S. Juliá; S. Pozo; S. Varona<br>Eisenda Miró and SeqCOVID-SPAIN consortium; Ferran Navarro; Núria Rabella                                                                                                                                                                                                                                                                                                                                                                                                                                                                                                                                                                    |
| EPI_ISL_458028                                                                                                                                                                                                                                                                                                                                                                                                                                               | Hospital for Tropical Diseases                                                                                                                                                                                     | COVID-19 Network Investigations (CONI) Alliance                                                                                                                                                                                                                                                                                                                             | Akanit jittmitrathap; Angkana Huang; Anthony R. Jones; Arporn Wangwiwatsin; Bhakbhoom Panthan; Chonticha Klungtong; Ekawat Pasomsom; Elizabeth Batty; Insee Semsorn; Janjira Thaipudungpanit; Khajohn Joonsalak; Kingkan Rakmanee; Krittikorn Kumpornsin; Namfon Kotanan; Nantarat Chantawatt; Pornsawan Leangwutiwong; Stefan Fernandez; Thanat Chookajong; Theerarat Kochakarn; Treewat Watthanachokkha; Wasun Chantrattai; Weena Janwitthayanon; Wuttichai Manasatienkij                                                                                                                                                                                                                                                                                                                                                                                                                                                                                                                                                                                                                                                                                 |
| EPI_ISL_2788566<br>EPI_ISL_2786595<br>EPI_ISL_1077280,<br>EPI_ISL_2219818<br>EPI_ISL_475525<br>EPI_ISL_2466657<br>EPI_ISL_645082                                                                                                                                                                                                                                                                                                                             | Hospital of Southern Norway - Kristiansand, Department of<br>Medical Microbiology<br>Houston Methodist Hospital<br>Huddinge VC<br>Human Genetic Research Center, Kawasr Biotech Company                            | Norwegian Institute of Public Health, Department of Virology<br>Houston Methodist Hospital<br>The Public Health Agency of Sweden<br>Kawasr Biotech Company                                                                                                                                                                                                                  | Atiya R Ali; Debech Nadia; Engebretsen Serina Beate; Garcia Llorente Ignacio; Hilde Elshaug; Hilde Vollan; Jon Bråte; Kamilla Heddelund Inefjord; Karoline Bragstad; Kathrine Stene-Johansen; Line Victoria Moen; Marie Paulsen Madsen; Olav Hungenes; Pedersen Benedikte Nevjen; Rasmus Riis Kopperud<br>Ilya J. Finkelstein; James J. Davis; Jessica Cambric; Jimmy Gollihar; Kristina Reppond; Layne Pruitt; Madison N. Shyer; Marcus Nguyen; Matthew Ojeda Saavedra; Paul A. Christensen; Prasanti Yerramilli; Randall J. Olsen; Robert Olson; Ryan Gadd; S. Wesley Long; Sishir Subedi; and James M. Musser<br>Anna Risberg; Anna-Malin Linde; Karin Tegmark-Wisell; Maria Lind Karlberg; Mattias Haukland; Mia Brytting; Olov Svartstrom; Oskar Karlsson Lindsjö; Reza Advani; Sandra Broddesson<br>Abbasalipour, M.; Azadmanesh, K.; Chamran Hospital, C.; Khosravi; M.A.; National Institute for Medical Research Development, N.; Zeinali, R.; Zeinali, S.                                                                                                                                                                                         |
| EPI_ISL_526224,<br>EPI_ISL_526225,<br>EPI_ISL_1041201<br>EPI_ISL_1296394<br>EPI_ISL_2637514                                                                                                                                                                                                                                                                                                                                                                  | Hungarian Defence Forces Military Medical Centre<br>Hôpital Bichat Claude Bernard, Laboratoire de Virologie<br>Hôpital Cochin                                                                                      | National Laboratory of Virology, Szentágotai Research<br>Centre<br>IAME UMR1137 Inserm, Université de Paris, Hôpital Bichat<br>Department of Virology, Henri Mondor University Hospital,<br>Assistance Publique Hôpitaux de Paris, Université Paris-Est<br>Cretelil, INSERM U955                                                                                            | Balázs Somogyi; Bálint Eszenyi; Csaba Pereszlényi; Endre Gábor Tóth; Ferenc Jakab; Gábor Kemenesi; Ágnes Balázs-Nagy<br>Alexandre Storto; Amélie Recoing; Antoine Bridier-Nahmias; Benoit Visseaux; Charlotte Charpentier; Diane Descamps; Gilles Collin; Lena Daniel; Mélanie Bertine; Nadhira Houhou-Fidouh; Quentin Le Hingrat; Siham Hamri<br>Alexandre Soulier; Christophe Rodriguez; Elisabeth Trawinski; Guillaume Gricourt; Jean-Michel Pawlowsky; Melissa N'Debi; Slim Fourati; Vanessa Demontant                                                                                                                                                                                                                                                                                                                                                                                                                                                                                                                                                                                                                                                  |
| EPI_ISL_710532                                                                                                                                                                                                                                                                                                                                                                                                                                               | Hôpital Fattouma-Bourguiba de Monastir                                                                                                                                                                             | Laboratoire des Procédés de Criblage Moléculaire et<br>Cellulaire-Centre de Biotechnologie de Sfax                                                                                                                                                                                                                                                                          | A. and Masmoudi, S.; Abdelmoulah, F.; Abid, N.; Ajili, F.; Aouni, M.; Ben Ayed, I.; Bensaïd, M.; Chtourou, A.; Elargoubi, A.; Fki-berrajah, L.; Gaaloul, I.; Gargouri, S.; Hammami, A.; Kamoun, S.; Karray Hakim, H.; Kharat, N.; Mastouri, M.; Mhalla, S.; Nabil, A.; Rebai; Smeti, I.; Souissi, A.; Stambouli, N.; Turki, M.                                                                                                                                                                                                                                                                                                                                                                                                                                                                                                                                                                                                                                                                                                                                                                                                                              |
| EPI_ISL_961579                                                                                                                                                                                                                                                                                                                                                                                                                                               | Hôpital Georges L. Dumont                                                                                                                                                                                          | National Microbiology Laboratory (NML)                                                                                                                                                                                                                                                                                                                                      | Anna Majer; Anneliese Landgraff; CanCOGeN's metadata curation team; Darian Hole; Elsie Grudskij; Gary Van Domselaar; Grace Seo; Guillaume Desnoyers; Jennifer Tanner; Kirsten Biggar; Madison Chapel; Morag Graham; Natalie Knox; Nathalie Bastien; Philip Mabon; Public Health Agency of Canada CanCOGeN team; Rhiannon Huzarewich; Richard Garceau; Russell Mandes; Shari Tyson; Timothy Booth; Yan Li                                                                                                                                                                                                                                                                                                                                                                                                                                                                                                                                                                                                                                                                                                                                                    |
| EPI_ISL_535716<br>EPI_ISL_2384050,<br>EPI_ISL_2384052<br>EPI_ISL_2840309<br>EPI_ISL_903753                                                                                                                                                                                                                                                                                                                                                                   | Hôpital de Verdun<br>IA State Hygienic Laboratory<br>ID Bureau of Laboratories<br>ID Bureau of Laboratories                                                                                                        | Laboratoire de santé publique du Québec<br>Centers for Disease Control and Prevention Division of Viral<br>Diseases, Pathogen Discovery<br>Centers for Disease Control and Prevention Division of Viral<br>Diseases, Pathogen Discovery<br>Genomics and Discovery, Respiratory Viruses Branch,<br>Division of Viral Diseases, Centers for Disease Control and<br>Prevention | Guillaume Bourque; Ioannis Ragoussis; Jesse Shapiro; Mark Lathrop and Michel Roger on behalf of the CoVSeQ research group; Sandrine Moreira<br>Alison Laufer Halpin; Ben L. Rambo-Martin; Clinton R. Paden; Dakota Howard; Darlene Wagner; Dave Wentworth; Dhvani Batra; Jasmine Padilla; Justin Lee; Katie Dillon; Krista Queen; Kristen Knipe; Kristine Lacek; Mark Burroughs; Matthew Scherer; Mili Sheth; Peter Cook; Sam Shepard; Sarah Nobles; Shoshona Le; Suxiang Tong; Vivien Dugan; Yvette Unarumhi<br>Alison Laufer Halpin; Ben L. Rambo-Martin; Clinton R. Paden; Dakota Howard; Darlene Wagner; Dave Wentworth; Dhvani Batra; Jasmine Padilla; Justin Lee; Katie Dillon; Krista Queen; Kristen Knipe; Kristine Lacek; Mark Burroughs; Matthew Scherer; Mili Sheth; Peter Cook; Sam Shepard; Sarah Nobles; Shoshona Le; Suxiang Tong; Vivien Dugan; Yvette Unarumhi<br>Anna Montmayeur; Anna Uehara; Ben L. Rambo-Martin; Clinton R. Paden; Dhvani Batra; Haibin Wang; Jasmine Padilla; Jing Zhang; Justin Lee; Krista Queen; Lori Rowe; Mark Burroughs; Mili Sheth; Peter W. Cook; Rachel Marine; Sarah Nobles; Suxiang Tong; Yan Li; Ying Tao |
| EPI_ISL_2234876, EPI_ISL_2444806, EPI_ISL_2444813, EPI_ISL_2444814, EPI_ISL_2444815, EPI_ISL_2444817, EPI_ISL_2444819, EPI_ISL_2444820, EPI_ISL_2444821, EPI_ISL_2444822, EPI_ISL_2444823, EPI_ISL_2444825, EPI_ISL_2444827, EPI_ISL_2444829, EPI_ISL_2444830, EPI_ISL_2444834, EPI_ISL_2444836, EPI_ISL_2444838, EPI_ISL_2444839                                                                                                                            | see above<br>IICS-UNA<br>ILV Kärnten                                                                                                                                                                               | IICS-UNA<br>Bergthaler laboratory, CeMM Research Center for Molecular<br>Medicine of the Austrian Academy of Sciences                                                                                                                                                                                                                                                       | Adriana Valenzuela; Alejandra Rojas; Chyntia Diaz; Eva Nara; Fatima Cardozo; Florencia del Puerto; Joel Ortiz; Jonas Fernandez; Laura Franco; Laura Mendoza; Leticia Rojas; Magaly Martinez; Maria Eugenia Galeano.<br>Andreas Bergthaler; Anna Schedl; Bekir Erguner; Benedikt Agerer; Christoph Bock; Fabian Amman; Jan Laine; Lukas Endler; Maelle Le Moing; Martin Senekowitsch; Matthew Thornton; Michael Schuster; Petr Triska; Thomas Penz                                                                                                                                                                                                                                                                                                                                                                                                                                                                                                                                                                                                                                                                                                           |
| EPI_ISL_2827770,<br>EPI_ISL_2827774,<br>EPI_ISL_2827780,<br>EPI_ISL_2827784<br>EPI_ISL_1439879,<br>EPI_ISL_2845684<br>EPI_ISL_1722245<br>EPI_ISL_1721083<br>EPI_ISL_2657686                                                                                                                                                                                                                                                                                  | IMAT S.A.S.<br>IMD - Labor Oderland<br>IMD - Medizinisches Labor Rostock<br>IMD Labor Frankfurt<br>INCIENSA                                                                                                        | Instituto Nacional de Salud- Dirección de Investigación en<br>Salud Pública<br>Robert Koch Institute<br>Robert Koch Institute<br>Robert Koch Institute<br>Incienza, Instituto Costarricense de Investigación y<br>Enseñanza en Nutrición y Salud                                                                                                                            | Carlos Franco-Muñoz; Carmen Osorio; Diana Malo; Diego A. Álvarez-Díaz; Diego Andrés Prada; Gerardo Santamaría; Hector Alejandro Ruiz-Moreno; Jhonnatan Reales-González; Jorge Rivera; Juan Camilo Martínez; Julian Naizaque; Katherine Laiton-Donato; Lisseth Pardo; Magdalena Wiesner; Marcela Mercado-Reyes; Maria T. Herrera-Sepúlveda; Marta Lopez Blanco; Maritza Lucia Ospina Martínez; Paola Rojas; Sergio Gomez; Sheryll Corchuelo; Ángela Alarcon Cruz<br>Abdoulaye Djimde; Amadou Daou; Antoine Dara; Demba Koita; Ibrehima Guindo                                                                                                                                                                                                                                                                                                                                                                                                                                                                                                                                                                                                                |
| EPI_ISL_2319343                                                                                                                                                                                                                                                                                                                                                                                                                                              | INDRE                                                                                                                                                                                                              | Instituto Nacional de Medicina Genomica                                                                                                                                                                                                                                                                                                                                     | Cedro-Tanda A; Garcia-Cardenas FJ; Gisela Barrera-Badillo; Gonzalez-Barrera D; Gonzalez-Woge MA; Herrera-Montalvo LA.; Hidalgo-Miranda A.; Irma Lopez-Martinez; Jose Ernesto Ramirez González; Mendoza-Vargas A; Munguia-Garza P; Rangel-DeLeon D; Reyes-Grajeda JP                                                                                                                                                                                                                                                                                                                                                                                                                                                                                                                                                                                                                                                                                                                                                                                                                                                                                         |
| EPI_ISL_1577752,<br>EPI_ISL_1577815,<br>EPI_ISL_2628208,<br>EPI_ISL_2628297,<br>EPI_ISL_2628307<br>EPI_ISL_2878585,<br>EPI_ISL_2881318<br>EPI_ISL_2812628<br>EPI_ISL_3019053<br>EPI_ISL_2503286,<br>EPI_ISL_2503354,<br>EPI_ISL_2548404,<br>EPI_ISL_2676269,<br>EPI_ISL_3019399<br>EPI_ISL_2672210,<br>EPI_ISL_2672216,<br>EPI_ISL_2672330,<br>EPI_ISL_2672993<br>EPI_ISL_2484167<br>EPI_ISL_826816,<br>EPI_ISL_826825,<br>EPI_ISL_826830,<br>EPI_ISL_826834 | INSPI-CRN DE INFLUENZA Y OTROS VIRUS RESPIRATORIOS<br>INSACOQ Surveillance<br>INSACOQ-MANIPUR<br>INSACOQ-Sikkim<br>INSACOQ-WB<br>INSP, Bamako<br>INSP-Bamako<br>INSPI-CRN DE INFLUENZA Y OTROS VIRUS RESPIRATORIOS | INSACOQ at CSIR Institute of Genomics and Integrative<br>Biology<br>National Institute of Biomedical Genomics - INSACOQ<br>National Institute of Biomedical Genomics - INSACOQ<br>National Institute of Biomedical Genomics - INSACOQ<br>Malaria Research and Training Center-Parasito<br>Malaria Research and Training Center<br>Instituto de Salud Publica de Chile       | INSACOQ<br>Arindam Maitra; Khumanthem Ranjana; Nanaocha Sharma; Nidhan Kumar Biswas; R K Manglem Singh; Saumitra Das; Sreedhar Chinnaswamy<br>Arindam Maitra; Kaden Zangmu Bhubti; Nidhan Kumar Biswas; Saumitra Das; Sreedhar Chinnaswamy Tshering Ongmu Bhubti; Tara D Sharma<br>Ajay Chakraborti; Arindam Maitra; Bhaswati Bandyopadhyay; Nidhan Kumar Biswas; Saumitra Das; Sreedhar Chinnaswamy; Tamal Ghosh<br>Abdoulaye Djimde; Amadou Daou; Antoine Dara; Demba Koita; Ibrehima Guindo<br>Abdoulaye Djimde; Amadou Daou; Antoine Dara; Demba Koita; Ibrehima Guindo<br>Alfredo Bruno; Andres Castillo; Barbara Parra; Domenica de Mora; Gisselle Barra; Jaime Lagos; Javier Tognarelli; Jimmy Garcez; Jorge Fernandez; Loredana Arata; Manuel Gonzalez; Martiza Olmedo; Michelle Paez; Patricia Bustos; Rodrigo Fasce; Solon Narvaez                                                                                                                                                                                                                                                                                                                |
| EPI_ISL_2488721, EPI_ISL_2488741, EPI_ISL_2488743, EPI_ISL_2757586, EPI_ISL_2757591, EPI_ISL_2757595, EPI_ISL_2757601, EPI_ISL_2757646, EPI_ISL_2893553, EPI_ISL_2893554, EPI_ISL_2893592, EPI_ISL_2893605, EPI_ISL_2893608, EPI_ISL_2893620, EPI_ISL_2893664, EPI_ISL_2897542, EPI_ISL_2897546, EPI_ISL_2988508, EPI_ISL_2988528, EPI_ISL_2988546, EPI_ISL_2988550, EPI_ISL_2988562,                                                                        | see above<br>INSPI-CRN DE INFLUENZA Y OTROS VIRUS RESPIRATORIOS<br>EPI_ISL_940775<br>EPI_ISL_1630269                                                                                                               | NIC-INSPI<br>INSPI-Centro de Investigación Multidisciplinaria de la DTIDI<br>Abbtod                                                                                                                                                                                                                                                                                         | Alfredo Bruno; Domenica de Mora.; Jimmy Garcés; Johanna Laines; Lizbeth Patiño; Manuel Gonzalez; Maritza Olmedo; Michelle Páez<br>Alberto Orlando.; Alfredo Bruno; Andrés Carrasco-Montaño; Doménica de Mora; Leandro Patiño; Manuel González; Maritza Olmedo; Mary Regato-Arrata; Melissa Zambrano; Orson Mestanza<br>Adbou Padane; Ambroise Ahoudi; Aminata Dia; Aminata Mboup; Ana Olivo; Anna julienne selbe Ndiaye; Barbara Harris; Cyrille Diedhiou; Gavin Cloherty; Mary Rodgers; Moustapha Mbou; Nafissatu Ley; Ndeye Diabou Diagne; Papa Alassane Diaw; Souleymane Mboup; Todd Meyer<br>Kenan Midilli; Mert Kuskucu; Yesim Tuyji Tok                                                                                                                                                                                                                                                                                                                                                                                                                                                                                                               |
| EPI_ISL_2015097,                                                                                                                                                                                                                                                                                                                                                                                                                                             | IU-Cerrahpasa, Cerrahpasa School of Medicine, COVID-19 Lab                                                                                                                                                         | IU-Cerrahpasa, Cerrahpasa School of Medicine, COVID-19 Lab                                                                                                                                                                                                                                                                                                                  |                                                                                                                                                                                                                                                                                                                                                                                                                                                                                                                                                                                                                                                                                                                                                                                                                                                                                                                                                                                                                                                                                                                                                             |

|                                                                                                                                                                                                                                                                                                                                                                                       |                                                                                                                                                   |                                                                                                                                                                                                                                                                                                                 |                                                                                                                                                                                                                                                                                                                                                                                                                                                                                                                 |                                                                                                                 |
|---------------------------------------------------------------------------------------------------------------------------------------------------------------------------------------------------------------------------------------------------------------------------------------------------------------------------------------------------------------------------------------|---------------------------------------------------------------------------------------------------------------------------------------------------|-----------------------------------------------------------------------------------------------------------------------------------------------------------------------------------------------------------------------------------------------------------------------------------------------------------------|-----------------------------------------------------------------------------------------------------------------------------------------------------------------------------------------------------------------------------------------------------------------------------------------------------------------------------------------------------------------------------------------------------------------------------------------------------------------------------------------------------------------|-----------------------------------------------------------------------------------------------------------------|
| EPI_ISL_2015111                                                                                                                                                                                                                                                                                                                                                                       |                                                                                                                                                   |                                                                                                                                                                                                                                                                                                                 |                                                                                                                                                                                                                                                                                                                                                                                                                                                                                                                 |                                                                                                                 |
| EPI_ISL_2628209, EPI_ISL_2628302, EPI_ISL_2628303, EPI_ISL_2628304, EPI_ISL_2628305, EPI_ISL_2628306                                                                                                                                                                                                                                                                                  | IVIC                                                                                                                                              | Laboratorio de Virología Molecular                                                                                                                                                                                                                                                                              | Carmen L Loureiro; CoViVen Group; Domingo J Garzaro; Esmeralda Vizzi; Flor H Pujol; Héctor R Rangel; José Luis Zambrano; Lieska Rodríguez; Mariana Hidalgo; Pierina D' Angelo; Rossana C Jaspe; Víctor Alarcón; Yoneira Sulbaran; Zoila Moros                                                                                                                                                                                                                                                                   |                                                                                                                 |
| EPI_ISL_738121                                                                                                                                                                                                                                                                                                                                                                        | IZSM-U.O.C. Virologia                                                                                                                             | Istituto Zooprofilattico Sperimentale del Mezzogiorno                                                                                                                                                                                                                                                           |                                                                                                                                                                                                                                                                                                                                                                                                                                                                                                                 | Giovanna Fusco; Lorena Cardillo; Maurizio Viscardi                                                              |
| EPI_ISL_2350569                                                                                                                                                                                                                                                                                                                                                                       | Ibaraki Prefectural Institute of Public Health                                                                                                    | Ibaraki Prefectural Institute of Public Health                                                                                                                                                                                                                                                                  |                                                                                                                                                                                                                                                                                                                                                                                                                                                                                                                 | Keiko Goto; Kentaro Itokawa; Makoto Kuroda; Masanori Hashino; Rina Tanaka; Tsuyoshi Sekizuka                    |
| EPI_ISL_2834665, EPI_ISL_2934986                                                                                                                                                                                                                                                                                                                                                      | Idaho Bureau of Laboratories                                                                                                                      | Center for Global Health, University of New Mexico Health Sciences Center                                                                                                                                                                                                                                       |                                                                                                                                                                                                                                                                                                                                                                                                                                                                                                                 | Christopher Ball; Darrell Dinwiddie; Daryl Domman; Kurt Schwalm; Matthew Burns; Robert Voermans; Valerie Morley |
| EPI_ISL_1323469                                                                                                                                                                                                                                                                                                                                                                       | Illinois Department of Public Health                                                                                                              | Gagnon Lab, Southern Illinois University                                                                                                                                                                                                                                                                        |                                                                                                                                                                                                                                                                                                                                                                                                                                                                                                                 | Keith Gagnon                                                                                                    |
| EPI_ISL_1018095, EPI_ISL_2001061, EPI_ISL_2001063, EPI_ISL_2001093, EPI_ISL_2508380                                                                                                                                                                                                                                                                                                   | Immunology, Noguchi Memorial Institute for Medical Research                                                                                       | Immunology, Noguchi Memorial Institute for Medical Research                                                                                                                                                                                                                                                     | A.W.; Adu, B.; Adusei-Poku; Agbenyo; Agbodzi, B.; Ampofo; Appiah-Kubi, J.; Asare; Assane, H.; Attiku; Awunyo, S.; Bonney; Dagnran, A.; Dorkenoo, A.; Egyir, B.; Halatoko; Issa, Z.; J.K.; K.M.; K.O.; Kossi, K.; Kumordjie, S.; Lamboni, L.; Layibo, Y.; M.A.; Maman, I.; Mohktar, Q.; Odoom; Opaku Frempong, H.; Oteng, F.; Owusu-Nyantakyi, C.; P.O.; S.B.; Sadjj; Salah, D.; Salou, M.; Uche; W.K.; Y.A.; Yeboah, C.                                                                                         |                                                                                                                 |
| EPI_ISL_2881744                                                                                                                                                                                                                                                                                                                                                                       | InDRE                                                                                                                                             | Instituto Nacional de Medicina Genómica                                                                                                                                                                                                                                                                         | Cedro-Tanda A; Garcia-Cardenas FJ; Gisela Barrera-Badillo; Gonzalez-Barrera D; Gonzalez-Woge MA; Herrera-Montalvo LA.; Hidalgo-Miranda A.; Irma Lopez-Martinez; Jose Ernesto Ramirez González; Mendoza-Vargas A; Munguia-Garza P; Rangel-DeLeon D; Reyes-Grajeda JP                                                                                                                                                                                                                                             |                                                                                                                 |
| EPI_ISL_1517392, EPI_ISL_1517399, EPI_ISL_1517404, EPI_ISL_1517416                                                                                                                                                                                                                                                                                                                    | Incienza, Instituto Costarricense de Investigación y Enseñanza en Nutrición y Salud                                                               | Incienza, Instituto Costarricense de Investigación y Enseñanza en Nutrición y Salud                                                                                                                                                                                                                             | Cristian Pérez-Corrales; Cristian Pérez-Corrales & Valeria Peralta-Barquero; Valeria Peralta-Barquero & César Cerdas Quesada; Valeria Peralta-Barquero & Mauricio Bolaños; Valeria Peralta-Barquero & Patricia Salas                                                                                                                                                                                                                                                                                            |                                                                                                                 |
| EPI_ISL_476704                                                                                                                                                                                                                                                                                                                                                                        | Incubadora Venezolana de Ciencia, Venezuela                                                                                                       | Incubadora Venezolana de Ciencia, Venezuela / Instituto Nacional de Salud, Bogotá, Colombia / Grupo de Investigaciones Microbiológicas-UR (GIMUR), Departamento de Biología, Facultad de Ciencias Naturales, Universidad del Rosario, Bogotá, Colombia / Icahn School of Medicine at Mount Sinai, New York, USA | Alberto Paniz-Mondolfi; Ana S. Gonzalez-Reiche; Angelica Rico; Anibal A. Teherán; Carolina Florez; Carolina Hernández; Emilia Mia Sordillo; Esther C. Barros; Harm van Bakel; Jesús E. James; Juan David Ramirez; Lisseth Pardo; Lourdes Delgado; Luis Perez-Garcia; Marina Muñoz; Matthew M. Hernandez; Sergio Gomez; Viviana Simon                                                                                                                                                                            |                                                                                                                 |
| EPI_ISL_3000158                                                                                                                                                                                                                                                                                                                                                                       | Infection Prevention & Control Unit                                                                                                               | Central Virology laboratory, Ministry of Health                                                                                                                                                                                                                                                                 | Asaf Biber; Danis Sofer; Efrat Bucris; Ella Mendelson; Gili Regev-Yochay; Ilana Tal; Michal Mandelboim; Miki Goldenfeld; Neta Zuckerman; Orna Mor; Sabrina Hason; Sharon Amit; Shiraz Gefen-Halevi                                                                                                                                                                                                                                                                                                              |                                                                                                                 |
| EPI_ISL_2693906                                                                                                                                                                                                                                                                                                                                                                       | Infectious Disease and Tropical Medicine Research Center, Resistant Tuberculosis Institute, Zahedan University of Medical Sciences, Zahedan, Iran | Genetics Research Center, University of Social Welfare and Rehabilitation Sciences                                                                                                                                                                                                                              | Ali Jafarpour; Azam Ghaziasadi; Ebrahim Kord; Hossein Najmabadi.; Khadijeh Jalalvand; Kimia Kahrizi; Marzieh Mohseni; Seyed Mohammad Hashemi-Shahri; Seyed Mohammad Jazayeri; Seyedeh elham Mortazavi; Zohreh Fatahi                                                                                                                                                                                                                                                                                            |                                                                                                                 |
| EPI_ISL_1969944                                                                                                                                                                                                                                                                                                                                                                       | Infectious Diseases Hospital IASI                                                                                                                 | National Institute of Infectious Diseases-Prof. Dr. Matei Bals Molecular Diagnostics Laboratory                                                                                                                                                                                                                 |                                                                                                                                                                                                                                                                                                                                                                                                                                                                                                                 | Andreea Tudor; Corina Casangiu; Dan Otelea; Leontina Banica; Marius Surleac; Ovidiu Vlaicu; Simona Paraschiv    |
| EPI_ISL_856714, EPI_ISL_856715                                                                                                                                                                                                                                                                                                                                                        | Infectious Diseases Unit, Department of Internal Medicine, Azienda Ospedaliera-Universitaria di Padova                                            | Laboratory of Infectious Diseases, Department of Biomedical and Clinical Sciences L. Sacco, University of Milan                                                                                                                                                                                                 | Alessia Lai; Anna Maria Cattelan; Annalisa Bergna; Carla Della Ventura; Claudia Balotta; Davide Leoni; Gianguglielmo Zehender on behalf of SARS-CoV-2 ITALIAN RESEARCH ENTERPRISE-(SCIRE) Collaborative Group; Lolita Sasset; Massimo Galli                                                                                                                                                                                                                                                                     |                                                                                                                 |
| EPI_ISL_2107507, EPI_ISL_2151337                                                                                                                                                                                                                                                                                                                                                      | Infectious Diseases, King Faisal Hospital Research Center                                                                                         | Infectious Diseases, King Faisal Hospital Research Center                                                                                                                                                                                                                                                       | Al-Qahtani A, A.; Alahideb B, M.; Alhamlan F, S.; Almaghribi R, S.; Alsanea M; Alsanea M, S.; Althawadi S, I.; Balavenkatesh Mani; Balavenkatesh Mani, M.; M. and UdayaRaja G. K.; Mutabagani M, S.; S. and Alahideb B, M.; UdayaRaja G. K.                                                                                                                                                                                                                                                                     |                                                                                                                 |
| EPI_ISL_2013699, EPI_ISL_2014214, EPI_ISL_2089063, EPI_ISL_2282745, EPI_ISL_2282747                                                                                                                                                                                                                                                                                                   | Infinity Biologix                                                                                                                                 | Centers for Disease Control and Prevention Division of Viral Diseases, Pathogen Discovery                                                                                                                                                                                                                       | Adrian Paskey; Benjamin Rambo-Martin; Chirayu Goswami; Christian Bixby; Christopher Gulvick; Clinton R. Paden; Dakota Howard; Darlene Wagner; Dhvani Batra; Duncan MacCannell; Jason Caravas; Jonathan Schultz; Kara Moser; Matthew Schmerer; Peter W. Cook; Robin Grimwood; Russ Hager; Scott Sammons; Shatavia Morrison; Yihe Wang; Yvette Unoarumhi                                                                                                                                                          |                                                                                                                 |
| EPI_ISL_1989269                                                                                                                                                                                                                                                                                                                                                                       | Innlandet Hospital Trust, Division Lillehammer, Department for Medical Microbiology                                                               | Norwegian Institute of Public Health, Department of Virology                                                                                                                                                                                                                                                    | Atiya R Ali; Debech Nadia; Engebretsen Serina Beate; Garcia Llorente Ignacio; Hilde Elshaug; Hilde Vollan; Jon Bråte; Kamilla Heddeland Instefjord; Karoline Bragstad; Kathrine Stene-Johansen; Marie Paulsen Madsen; Olav Hungnes; Pedersen Benedikte Nevjen; Rasmus Riis Kopperud                                                                                                                                                                                                                             |                                                                                                                 |
| EPI_ISL_2281228, EPI_ISL_2281229, EPI_ISL_2281230, EPI_ISL_2281237, EPI_ISL_2281238, EPI_ISL_2281245, EPI_ISL_2281256                                                                                                                                                                                                                                                                 | see above                                                                                                                                         | Institut Pasteur de Dakar                                                                                                                                                                                                                                                                                       | Amadou Alpha Sall; Amadou Diallo; Benjamin Selekon; Cheikh Loucoubar; Christian Malaka; Mamadou Diop; Marie-Astrid Vernet; Moussa Moïse Diagne; Ndack Ndiaye; Ndongo Dia; Ousmane Faye; Rivalyn Nakoune Yandoko; Safietou Sankhe; Sandra Garba Ouangole                                                                                                                                                                                                                                                         |                                                                                                                 |
| EPI_ISL_2828655                                                                                                                                                                                                                                                                                                                                                                       | Instituto Adolfo Lutz Central                                                                                                                     | Instituto Adolfo Lutz, Interdisciplinary Procedures Center, Strategic Laboratory                                                                                                                                                                                                                                | Caio Vinicius Dias Lopes; Claudia Regina Gonçalves; Claudio Tavares Sacchi; Erica Valessa Ramos Gomes; Karoline Rodrigues Campos                                                                                                                                                                                                                                                                                                                                                                                |                                                                                                                 |
| EPI_ISL_1907961, EPI_ISL_1908147, EPI_ISL_1908148, EPI_ISL_1908155, EPI_ISL_1908158, EPI_ISL_1908735, EPI_ISL_1908805, EPI_ISL_1908896, EPI_ISL_1908967, EPI_ISL_1909099, EPI_ISL_1909211, EPI_ISL_1909241, EPI_ISL_1909242, EPI_ISL_1909243, EPI_ISL_1909244, EPI_ISL_1909247, EPI_ISL_1909250, EPI_ISL_1909252, EPI_ISL_1913009, EPI_ISL_1913018, EPI_ISL_1913019, EPI_ISL_1913061, | see above                                                                                                                                         | Institut National d'Hygiène                                                                                                                                                                                                                                                                                     | Abdelmunim Essabbar; Fatima El Falaki; Fatima ElFalaki; Hicham Oumzil; Lahcen Belyamani and Azeddine Ibrahim; Mohamed Rhajaoui; Mohamed Rhajaoui; Mouna Ouadghiri; Saaid Amzazi; Tarik Aanniz                                                                                                                                                                                                                                                                                                                   |                                                                                                                 |
| EPI_ISL_1433132, EPI_ISL_1435763, EPI_ISL_1436817                                                                                                                                                                                                                                                                                                                                     | Institut National d'Hygiène                                                                                                                       | Unité Mixte Internationale TransVIHMI (UMI 233 IRD - U1175 INSERM - Université de Montpellier) IRD (Institut de recherche pour le développement)                                                                                                                                                                | Abla A. KONOU; Adodo SADJI; Ahidjo AYOUBA; Akoélé SILIADIN; Alassane OURO-MEDEL; Amivi EHLAN; Améyo DORKENOO; Anoumou DAGNRA; Christelle BUTEL; Déléma MABA; Eric DELAPORTE; Issaka Maman; Kokou TEGUENI; Laetitia SERRANO; Martine PEETERS; Messanh DOUFFAN; Mireille PRINCE-DAVID; Mounerou SALOU; Sidonie A.M.KAGNISSODE; Sika DOSSIM; Wembo A. HALATOKO                                                                                                                                                     |                                                                                                                 |
| EPI_ISL_2111158                                                                                                                                                                                                                                                                                                                                                                       | Institut National d'Hygiène Consortium National de Veille Génomique - Maroc                                                                       | Laboratoire de Biotechnologie                                                                                                                                                                                                                                                                                   | Abdelmunim Essabbar; Fatima El Falaki; Hicham Oumzil; Lahcen Belyamani and Azeddine Ibrahim; Mohamed Rhajaoui; Mouna Ouadghiri; Saaid Amzazi; Tarik Aanniz                                                                                                                                                                                                                                                                                                                                                      |                                                                                                                 |
| EPI_ISL_1415425, EPI_ISL_1416192, EPI_ISL_1443003                                                                                                                                                                                                                                                                                                                                     | Institut National d'hygiène                                                                                                                       | "Unité Mixte Internationale TransVIHMI (UMI 233 IRD - U1175 INSERM - Université de Montpellier) IRD (Institut de recherche pour le développement)"                                                                                                                                                              | Abla A. KONOU; Adodo SADJI; Ahidjo AYOUBA; Akoélé SILIADIN; Alassane OURO-MEDEL; Amivi EHLAN; Améyo DORKENOO; Anoumou DAGNRA; Christelle BUTEL; Déléma MABA; Eric DELAPORTE; Issaka Maman; Kokou TEGUENI; Laetitia SERRANO; Martine PEETERS; Messanh DOUFFAN; Mireille PRINCE-DAVID; Mounerou SALOU; Sidonie A.M.KAGNISSODE; Sika DOSSIM; Wembo A. HALATOKO                                                                                                                                                     |                                                                                                                 |
| EPI_ISL_1508958, EPI_ISL_1508960, EPI_ISL_1509101                                                                                                                                                                                                                                                                                                                                     | Institut National d'hygiène                                                                                                                       | Unité Mixte Internationale TransVIHMI (UMI 233 IRD - U1175 INSERM - Université de Montpellier) IRD (Institut de recherche pour le développement)                                                                                                                                                                | Abla A. KONOU; Adodo SADJI; Ahidjo AYOUBA; Akoélé SILIADIN; Alassane OURO-MEDEL; Amivi EHLAN; Améyo DORKENOO; Anoumou DAGNRA; Christelle BUTEL; Déléma MABA; Eric DELAPORTE; Issaka Maman; Kokou TEGUENI; Koku AGBODEKA; Laetitia SERRANO; Martine PEETERS; Messanh DOUFFAN; Mireille PRINCE-DAVID; Mounerou SALOU; Sidonie A.M.KAGNISSODE; Sika DOSSIM; Syntyche DEVATCHAGNI; Wembo A. HALATOKO                                                                                                                |                                                                                                                 |
| EPI_ISL_1321604, EPI_ISL_1406144, EPI_ISL_2278010                                                                                                                                                                                                                                                                                                                                     | Institut National d'Hygiène (INH)                                                                                                                 | Unité Mixte Internationale TransVIHMI (UMI 233 IRD - U1175 INSERM - Université de Montpellier)IRD (Institut de recherche pour le développement)                                                                                                                                                                 | Abla A. KONOU; Adodo SADJI; Ahidjo AYOUBA; Akoélé SILIADIN; Alassane OURO-MEDEL; Amivi EHLAN; Améyo DORKENOO; Anoumou DAGNRA; Christelle BUTEL; Déléma MABA; Eric DELAPORTE; Issaka Maman; Kokou TEGUENI; Laetitia SERRANO; Martine PEETERS; Messanh DOUFFAN; Mireille PRINCE-DAVID; Mounerou SALOU; Sidonie A.M.KAGNISSODE; Sika DOSSIM; Wembo A. HALATOKO                                                                                                                                                     |                                                                                                                 |
| EPI_ISL_418206, EPI_ISL_418210, EPI_ISL_418212, EPI_ISL_476562, EPI_ISL_480783, EPI_ISL_485708, EPI_ISL_486869                                                                                                                                                                                                                                                                        | see above                                                                                                                                         | Institut Pasteur de Dakar                                                                                                                                                                                                                                                                                       | Amadou Alpha Sall; Amadou Alpha Sall.; Amadou Alpha sall; Mamadou Diop; Mamadou Malado Jallow; Mamadou diop; Marie Henriette Dior Ndiome; Moussa Moïse Diagne; Ndongo Dia; Ousmane Faye; Safietou Sanke                                                                                                                                                                                                                                                                                                         |                                                                                                                 |
| EPI_ISL_498239                                                                                                                                                                                                                                                                                                                                                                        | Institut Pasteur de Dakar                                                                                                                         | Institut Pasteur de Dakar                                                                                                                                                                                                                                                                                       | Amadou Alpha Sall.; Mamadou Diop; Mamadou Malado Jallow; Marie Henriette Dior Ndiome; Moussa Moïse Diagne; Ndongo Dia; Ousmane Faye; Safietou Sankhe Mbengue                                                                                                                                                                                                                                                                                                                                                    |                                                                                                                 |
| EPI_ISL_2245787, EPI_ISL_2245795, EPI_ISL_2245816, EPI_ISL_2245819, EPI_ISL_2245821, EPI_ISL_2245840, EPI_ISL_2245855, EPI_ISL_2245859, EPI_ISL_2245862, EPI_ISL_2245864, EPI_ISL_2245865, EPI_ISL_2245882, EPI_ISL_2245892, EPI_ISL_2245894, EPI_ISL_2245897, EPI_ISL_2245910, EPI_ISL_2245931, EPI_ISL_2245957, EPI_ISL_2245958, EPI_ISL_2245960, EPI_ISL_2245964, EPI_ISL_2245966, | see above                                                                                                                                         | Institut Pasteur de Guinée                                                                                                                                                                                                                                                                                      | Dia Ndongo; Diagne Moussa Moïse; Diallo Amadou; Diop Mamadou; Faye Ousmane; Grayo Solene; Loucoubar Cheikh; Maimouna Mbanne; Mbengue Safietou Sankhe; Mohamed Kane; Ndiaye Ndack; Sall Amadou Alpha; Tordo Noel                                                                                                                                                                                                                                                                                                 |                                                                                                                 |
| EPI_ISL_613421, EPI_ISL_613438, EPI_ISL_613441, EPI_ISL_613446, EPI_ISL_613455                                                                                                                                                                                                                                                                                                        | Institut Pasteur de la Guadeloupe                                                                                                                 | Institut Pasteur de la Guadeloupe                                                                                                                                                                                                                                                                               | Angela Brisebarre; Antoine Talarmin; Camille Capel; Cherina Fleming; Etienne Simon-Lorière; Marion Barbet; Maud Vanpeene; Méline Bizard; Radjin Steingrover; Stéphanie Guymard; Sylvie Behillili; Sylvie van der Werf; Sébastien Breurec; Vincent Enouf                                                                                                                                                                                                                                                         |                                                                                                                 |
| EPI_ISL_459971                                                                                                                                                                                                                                                                                                                                                                        | Institut Pasteur du Maroc                                                                                                                         | Institut Pasteur du Maroc                                                                                                                                                                                                                                                                                       | Abdellah Faouzi; Anass Abbad; Anderrahmane Maaroufi; Angela Brisebarre; Camille Capel; Etienne Simon-Lorière; Jalal Nourili; Latifa Anga; Marion Barbet; Maud Vanpeene; Mjid Eloualid; Méline Bizard; Sylvie Behillili; Sylvie van der Werf; Vincent Enouf                                                                                                                                                                                                                                                      |                                                                                                                 |
| EPI_ISL_475820, EPI_ISL_1008302                                                                                                                                                                                                                                                                                                                                                       | Institut für Virologie am Department für Hygiene, Mikrobiologie und Public Health                                                                 | Berghthaler laboratory, CeMM Research Center for Molecular Medicine of the Austrian Academy of Sciences                                                                                                                                                                                                         | Alexander Lercher; Alexandra Popa; Andreas Berghthaler; Anna Schedl; Bekir Erguner; Benedikt Agerer; Christoph Bock; Daniela Schmid; Dorothee von Laer; Elisabeth Puchhammer-Stoeckl; Franz Allerberger; Gregor Hörmann; Guenter Weiss; Henrike Colaco; Jakob-Wendelin Genger; Jan Laine; Judith Aberle; Kinga Rigler-Hohenwarter; Lukas Endler; Maelle Le Moing; Manfred Naiz; Mark Smyth; Martin Senekowitsch; Michael Schuster; Peter Hufnagl; Rainer Gattringer; Stephan Aberle; Thomas Penz; Wegene Borena |                                                                                                                 |
| EPI_ISL_955168                                                                                                                                                                                                                                                                                                                                                                        | Institute for Biocides and Medical Ecology                                                                                                        | Institute of microbiology and Immunology, Faculty of Medicine, University of Belgrade                                                                                                                                                                                                                           | Jankovic, M.; Jovanovic, T.; Knezevic, A.; Milicevic, O.; Sekler, M.; Tesovic, B.; Vidanovic, D.                                                                                                                                                                                                                                                                                                                                                                                                                |                                                                                                                 |
| EPI_ISL_1657085, EPI_ISL_1915108                                                                                                                                                                                                                                                                                                                                                      | Institute for Developing Science and Health Initiatives (IdeSHI)                                                                                  | Institute for Developing Science and Health Initiatives (IdeSHI)                                                                                                                                                                                                                                                | Fidausi Qadri; Hassan Afrad; Sadia Rahman; Tahmina Shirin                                                                                                                                                                                                                                                                                                                                                                                                                                                       |                                                                                                                 |
| EPI_ISL_1822604, EPI_ISL_1827861, EPI_ISL_1827862, EPI_ISL_1827865, EPI_ISL_1827890, EPI_ISL_1827915, EPI_ISL_1827932, EPI_ISL_1827945                                                                                                                                                                                                                                                | see above                                                                                                                                         | Institute for Health Research, Epidemiological Surveillance and Training (IRESSEF)                                                                                                                                                                                                                              | Adbou Padane; Ambrose Ahoudi; Aminata Dia; Aminata Mboup; Ana Olivo; Anna Julienne selbe Ndiaye; Barbara Harris; Cyrille Diedhiou; Gavin Cloherty; Mary Rodgers; Moustapha Mbou; Nafissatu Ley; Ndeye Diabou Diagne; Papa Alassane Diaw; Souleymane Mboup; Todd Meyer                                                                                                                                                                                                                                           |                                                                                                                 |
| EPI_ISL_574790                                                                                                                                                                                                                                                                                                                                                                        | Institute for Infectious Diseases, University of Bern                                                                                             | Institute for Infectious Diseases, University of Bern                                                                                                                                                                                                                                                           | Alban Ramette; Christian Baumann; Cora Sägesser; Franziska Suter-Riniker; Michel C Koch; Miguel A Terrazos Miani; Peter Keller; Stephen L Leib                                                                                                                                                                                                                                                                                                                                                                  |                                                                                                                 |
| EPI_ISL_2758186                                                                                                                                                                                                                                                                                                                                                                       | Institute for Laboratory Diagnostics and Microbiology, Klinikum Klagenfurt am Wörthersee                                                          | Berghthaler laboratory, CeMM Research Center for Molecular Medicine of the Austrian Academy of Sciences                                                                                                                                                                                                         | Andreas Berghthaler; Anna Schedl; Bekir Erguner; Benedikt Agerer; Christoph Bock; Fabian Amman; Jan Laine; Lukas Endler; Maelle Le Moing; Martin Senekowitsch; Matthew Thornton; Michael Schuster; Petr Triska; Thomas Penz                                                                                                                                                                                                                                                                                     |                                                                                                                 |



|                                                                                                                                                                                                                                                                                                                                                                                                                                                                                                                                                                                                       |                                                                                                                                                                                |                                                                                                                                                |                                                                                                                                                                                                                                                                                                                                                                                                                                                                                                                                                                                                                                                                                                                                                                                                                                                                                                                                                                                                                                                                                                                                                                |                                                                                                           |
|-------------------------------------------------------------------------------------------------------------------------------------------------------------------------------------------------------------------------------------------------------------------------------------------------------------------------------------------------------------------------------------------------------------------------------------------------------------------------------------------------------------------------------------------------------------------------------------------------------|--------------------------------------------------------------------------------------------------------------------------------------------------------------------------------|------------------------------------------------------------------------------------------------------------------------------------------------|----------------------------------------------------------------------------------------------------------------------------------------------------------------------------------------------------------------------------------------------------------------------------------------------------------------------------------------------------------------------------------------------------------------------------------------------------------------------------------------------------------------------------------------------------------------------------------------------------------------------------------------------------------------------------------------------------------------------------------------------------------------------------------------------------------------------------------------------------------------------------------------------------------------------------------------------------------------------------------------------------------------------------------------------------------------------------------------------------------------------------------------------------------------|-----------------------------------------------------------------------------------------------------------|
| EPI_ISL_490090, EPI_ISL_490096, EPI_ISL_490101, EPI_ISL_490103, EPI_ISL_644672, EPI_ISL_718289, EPI_ISL_718301, EPI_ISL_944102, EPI_ISL_1114744, EPI_ISL_1263458, EPI_ISL_1406244, EPI_ISL_1673342, EPI_ISL_1696746, EPI_ISL_1696754, EPI_ISL_1787317, EPI_ISL_2091000, EPI_ISL_2625633, EPI_ISL_2685838                                                                                                                                                                                                                                                                                              | see above                                                                                                                                                                      | Institute for Medical Research, Infectious Disease Research Centre, National Institutes of Health, Ministry of Health Malaysia                 | Institute for Medical Research, Infectious Disease Research Centre, National Institutes of Health, Ministry of Health Malaysia                                                                                                                                                                                                                                                                                                                                                                                                                                                                                                                                                                                                                                                                                                                                                                                                                                                                                                                                                                                                                                 | Azizan MA; Kalyanasundram J; Kamel K; Mohd Zawawi Z; Mohd-Zawawi Z; Ramly N; Robert F; Supiah J; Thayan R |
| EPI_ISL_2324270                                                                                                                                                                                                                                                                                                                                                                                                                                                                                                                                                                                       | Institute for Medical and Chemical Laboratory Diagnostics, Kepler Universitätsklinikum                                                                                         | Berghthaler laboratory, CeMM Research Center for Molecular Medicine of the Austrian Academy of Sciences                                        | Andreas Berghthaler; Anna Schedl; Bekir Erguner; Benedikt Agerer; Christoph Bock; Fabian Amman; Jan Laine; Lukas Endler; Maelle Le Moing; Martin Senekowitsch; Michael Schuster; Petr Triska; Thomas Penz                                                                                                                                                                                                                                                                                                                                                                                                                                                                                                                                                                                                                                                                                                                                                                                                                                                                                                                                                      |                                                                                                           |
| EPI_ISL_812955, EPI_ISL_1491539, EPI_ISL_1511131                                                                                                                                                                                                                                                                                                                                                                                                                                                                                                                                                      | Institute for Urban Disease Control and Prevention                                                                                                                             | COVID-19 Network Investigations (CONI) Alliance                                                                                                | Amornmas Kongklieng; Anek Mungaomklang; Angkana Huang; Anthony R. Jones; Arporn Wangwiwatsin; Bhakbhoom Panthan; Chonticha Klungton; Duangkamon Loesbanluechai; Ekawat Pasomsub; Elizabeth Batty; Insee Sensors; Janjira Thaipadungpanit; Kamolthip Atsawawaranunt; Khajohn Joonlasak; Kingkan Rakmanee; Krittikorn Kumpornsri; Namfon Kotanan; Prayuth Kaewmalang; Pukkapon Parnwijitkul; Stefan Fernandez; Thanat Chookajorn; Theerarat Kochakarn; Treewat Wattthanachokchai; Vichan Pawun; Wasun Chantratita; Wudtichai Manasatienkij                                                                                                                                                                                                                                                                                                                                                                                                                                                                                                                                                                                                                       |                                                                                                           |
| EPI_ISL_626228                                                                                                                                                                                                                                                                                                                                                                                                                                                                                                                                                                                        | Institute for Virology, University Hospital Essen                                                                                                                              | Center of Medical Microbiology, Virology, and Hospital Hygiene, University of Duesseldorf                                                      | Alexander Dilthey; Andreas Walker; Daniel Strelow; Jessica Nicolai; Jörg Timm; Klaus Pfeffer; Lisanna Hülse; Malte Kohns Vasconcelos; Maximilian Dماغnez; Nadine Lübke; Olympia E. Anastasio; Tobias Wienemann; Torsten Houwaart; Ulf Dittmer                                                                                                                                                                                                                                                                                                                                                                                                                                                                                                                                                                                                                                                                                                                                                                                                                                                                                                                  |                                                                                                           |
| EPI_ISL_2137158                                                                                                                                                                                                                                                                                                                                                                                                                                                                                                                                                                                       | Institute for Water Quality and Resource Management, Technical University Vienna                                                                                               | Berghthaler laboratory, CeMM Research Center for Molecular Medicine of the Austrian Academy of Sciences                                        | Andreas Berghthaler; Anna Schedl; Bekir Erguner; Benedikt Agerer; Christoph Bock; Fabian Amman; Jan Laine; Lukas Endler; Maelle Le Moing; Martin Senekowitsch; Michael Schuster; Petr Triska; Thomas Penz                                                                                                                                                                                                                                                                                                                                                                                                                                                                                                                                                                                                                                                                                                                                                                                                                                                                                                                                                      |                                                                                                           |
| EPI_ISL_1057041, EPI_ISL_1057098                                                                                                                                                                                                                                                                                                                                                                                                                                                                                                                                                                      | Institute of Biocides and Medical Ecology, Belgrade, Serbia                                                                                                                    | Virology Department Institute of Microbiology and Immunology Faculty of Medicine University of Belgrade                                        | Abazovic Dzihan; Banko Ana; Despot Dragana; Loncar Ana; Milicevic Ognjen; Miljanovic Danijela                                                                                                                                                                                                                                                                                                                                                                                                                                                                                                                                                                                                                                                                                                                                                                                                                                                                                                                                                                                                                                                                  |                                                                                                           |
| EPI_ISL_891266                                                                                                                                                                                                                                                                                                                                                                                                                                                                                                                                                                                        | Institute of Biocides and Medical Ecology, Belgrade, Serbia                                                                                                                    | Virology department Institute of microbiology and immunology Faculty of Medicine University of Belgrade                                        | Abazovic Dzihan; Banko Ana; Despot Dragana; Loncar Ana; Milicevic Ognjen; Miljanovic Danijela                                                                                                                                                                                                                                                                                                                                                                                                                                                                                                                                                                                                                                                                                                                                                                                                                                                                                                                                                                                                                                                                  |                                                                                                           |
| EPI_ISL_2180456, EPI_ISL_2284894, EPI_ISL_2600368, EPI_ISL_2600369, EPI_ISL_2774039, EPI_ISL_2774043, EPI_ISL_2774074                                                                                                                                                                                                                                                                                                                                                                                                                                                                                 | see above                                                                                                                                                                      | Institute of Epidemiology, Disease Control and Research (IEDCR)                                                                                | Firdausi Qadri; Hassan Afrad; Manjur Hossain Khan; Sadia Rahman; Tahmina Shirin                                                                                                                                                                                                                                                                                                                                                                                                                                                                                                                                                                                                                                                                                                                                                                                                                                                                                                                                                                                                                                                                                |                                                                                                           |
| EPI_ISL_1938476                                                                                                                                                                                                                                                                                                                                                                                                                                                                                                                                                                                       | Institute of Epidemiology, Disease Control and Research (IEDCR)                                                                                                                | Institute for Developing Science and Health Initiatives (ideSHI)                                                                               | Fidausi Qadri; Hassan Afrad; Sadia Rahman; Tahmina Shirin                                                                                                                                                                                                                                                                                                                                                                                                                                                                                                                                                                                                                                                                                                                                                                                                                                                                                                                                                                                                                                                                                                      |                                                                                                           |
| EPI_ISL_864573                                                                                                                                                                                                                                                                                                                                                                                                                                                                                                                                                                                        | Institute of Medical Microbiology and Hospital Hygiene                                                                                                                         | Institute of Medical Microbiology and Hospital Hygiene                                                                                         | Aljoscha Tersteegen; Prof. Dr. Achim Kaasch                                                                                                                                                                                                                                                                                                                                                                                                                                                                                                                                                                                                                                                                                                                                                                                                                                                                                                                                                                                                                                                                                                                    |                                                                                                           |
| EPI_ISL_1511107, EPI_ISL_1668835, EPI_ISL_1964492, EPI_ISL_2492324, EPI_ISL_2492327, EPI_ISL_2644269, EPI_ISL_2932442, EPI_ISL_2955269, EPI_ISL_2966919, EPI_ISL_3039361                                                                                                                                                                                                                                                                                                                                                                                                                              | see above                                                                                                                                                                      | Institute of Microbiology and Immunology, Faculty of Medicine, University of Ljubljana                                                         | Alen Suljić; Andraž Celar; Dominika Šturm; Doroteja Vljaj; Mario Poljak; Matic Brvar; Miša Korva; Patricija Pozvek; Samo Zakotnik; Tatjana Avšič - Županc; Tomaž Mark Zorec; Špela Pleh                                                                                                                                                                                                                                                                                                                                                                                                                                                                                                                                                                                                                                                                                                                                                                                                                                                                                                                                                                        |                                                                                                           |
| EPI_ISL_417482, EPI_ISL_477016, EPI_ISL_4919336, EPI_ISL_516650, EPI_ISL_516651, EPI_ISL_527813, EPI_ISL_539789, EPI_ISL_606530, EPI_ISL_697798, EPI_ISL_728202, EPI_ISL_782028, EPI_ISL_824285, EPI_ISL_877557, EPI_ISL_1805654, EPI_ISL_1805657, EPI_ISL_1805711, EPI_ISL_1896678, EPI_ISL_1896691, EPI_ISL_1896695, EPI_ISL_2004102, EPI_ISL_2004105, EPI_ISL_2086711, EPI_ISL_2100425, EPI_ISL_2100438, EPI_ISL_2134873, EPI_ISL_2228102, EPI_ISL_2261860, EPI_ISL_2361462, EPI_ISL_2361472, EPI_ISL_2361476, EPI_ISL_2484966, EPI_ISL_2534327, EPI_ISL_2689843, EPI_ISL_2774510, EPI_ISL_2861153 | see above                                                                                                                                                                      | Institute of Microbiology, Universidad San Francisco de Quito                                                                                  | ; Alberto Velez; Andrea Macías; Belén Prado-Vivar; Bernardo Darquea; Bernardo Gutiérrez; Carla Torres; Carlos Guerrero; Carlos Mena; Carolina Pacheco; Christian Zambrano; DamarisSandoya; David Zuñiga; Diana Zambrano; Edison Chavez; Erika Muñoz; Ernesto Pazos; Eulalia Pazmiño; Fernanda Zurita; Fernando Serrano; Francisco Ríos; Freddy Loor; Gabriel Trueba; Gabriela Zambrano; Guzmán Bernabéu Lorenzo; Hermeinda Paguay; Hugo Hernández; Hugo Luis Velez; Jorge Montaño; Juan Carlos Zuñiga; Juan José Guadalupe; Juan Pablo Haro; Juan Zuñiga; Katalina Pacheco; Katherine Ojeda; Khurram Mahbbob; Lgia Briceño; Luis Flores; Luis Morales; Manuel Jaramillo; Manuel Jibaja; Mayra Beltrán; Melissa Ortega; Rafael Morales; Michelle Grunauer; Milton Tobar; Miriam Ruiz; Monica Becerra-Wong; Monica Becerra-Wong Juan José Guadalupe; Nabih Dahik; Oscar Mena; Paola Dalgo; Patricio Reyes; Patricio Rojas-Silva; Patricio Vega-Mariño; Paul Cárdenas; Prado-Vivar; Rafael Parra; Raiza Briceño; Ramiro Echeverría Tapia; Rommel Guevara; Sully Márquez; Tania Guayasamin; Tania Lluma; Tanya Guayasamin; Verónica Barragán; Victor Vinctio Román |                                                                                                           |
| EPI_ISL_1745684, EPI_ISL_1745694, EPI_ISL_1745705, EPI_ISL_2346373, EPI_ISL_2727514, EPI_ISL_3006762                                                                                                                                                                                                                                                                                                                                                                                                                                                                                                  | Institute of Molecular and Translational Medicine / Laboratory of Experimental Medicine, Faculty of Medicine and Dentistry, Palacky University and University Hospital Olomouc | Institute of Molecular and Translational Medicine / Laboratory of Experimental Medicine, Faculty of Medicine and Dentistry, Palacky University | Barbora Blumová; Hana Dřimalová; Hana Jaworek; Marián Hajdúch; Rastislav Slavkovský; Tomáš Pospíšil; Vladimíra Koudeláková                                                                                                                                                                                                                                                                                                                                                                                                                                                                                                                                                                                                                                                                                                                                                                                                                                                                                                                                                                                                                                     |                                                                                                           |
| EPI_ISL_402123                                                                                                                                                                                                                                                                                                                                                                                                                                                                                                                                                                                        | Institute of Pathogen Biology, Chinese Academy of Medical Sciences & Peking Union Medical College                                                                              | Institute of Pathogen Biology, Chinese Academy of Medical Sciences & Peking Union Medical College                                              | Chao Wu; Jianwei Wang; Lili Ren; Qi Jin; Yiwei Liu; Zhiqiang Wu; Zichun Xiang                                                                                                                                                                                                                                                                                                                                                                                                                                                                                                                                                                                                                                                                                                                                                                                                                                                                                                                                                                                                                                                                                  |                                                                                                           |
| EPI_ISL_2932530, EPI_ISL_2932531, EPI_ISL_2986987                                                                                                                                                                                                                                                                                                                                                                                                                                                                                                                                                     | Institute of Public Health Kraljevo                                                                                                                                            | Veterinary Specialized Institute Kraljevo                                                                                                      | Afonso, C.; Banovic Djeri, B.; Djukic V. .; Jankovic, M.; Jovanovic, T.; Knezevic, A.; Petrovic, T.; Sekler, M.; Tesovic, B.; Vidanovic, D.; Volkening, J.                                                                                                                                                                                                                                                                                                                                                                                                                                                                                                                                                                                                                                                                                                                                                                                                                                                                                                                                                                                                     |                                                                                                           |
| EPI_ISL_2657582, EPI_ISL_1712568                                                                                                                                                                                                                                                                                                                                                                                                                                                                                                                                                                      | Institute of Public Health Šibenik-Knin County                                                                                                                                 | Croatian Institute of Public Health                                                                                                            | Irena Tabain; Ivana Ferenčak                                                                                                                                                                                                                                                                                                                                                                                                                                                                                                                                                                                                                                                                                                                                                                                                                                                                                                                                                                                                                                                                                                                                   |                                                                                                           |
| EPI_ISL_577740, EPI_ISL_577742, EPI_ISL_904001, EPI_ISL_1994596, EPI_ISL_2351249, EPI_ISL_2894457                                                                                                                                                                                                                                                                                                                                                                                                                                                                                                     | Institute of Virology Department of Hygiene, Microbiology and Public Health at Innsbruck Medical University                                                                    | Institute of Virology Department of Hygiene, Microbiology and Public Health at Innsbruck Medical University                                    | Andre Volland; Barbara Falkensammer; David Bante; Dorothee von Laer; Heribert Stoiber; Janine Kimpel; Lisa Pipperger; Lydia Riepler; Wegene Borena                                                                                                                                                                                                                                                                                                                                                                                                                                                                                                                                                                                                                                                                                                                                                                                                                                                                                                                                                                                                             |                                                                                                           |
| EPI_ISL_577740, EPI_ISL_577742, EPI_ISL_904001, EPI_ISL_1994596, EPI_ISL_2351249, EPI_ISL_2894457                                                                                                                                                                                                                                                                                                                                                                                                                                                                                                     | Institute of Virology, Biomedical Research Center of the Slovak Academy of Sciences, Bratislava                                                                                | Faculty of Natural Sciences, Comenius University, Bratislava                                                                                   | Boris Klempa; Brona Brejova; Broňa Brejová; Dominika Fričová; Edita Starohová; Elena Tichá; Jozef Nosek; Juraj Kopacek; Juraj Kopáček; Kristína Borsova; Kristína Boršová; Lubomira Lukacikova; Martina Lickova; Martina Ličková; Martina Nebachova; Martina Nebohačová; Monika Slavikova; Monika Sláviková; Sabina Fumacova Havlikova; Sabina Fumačová Havliková; Tomas Vina; Tomáš Vinař; Viktoria Cabanova; Viktoria Hodorova; Viktória Hodorová; Viktória Cabanová; Lubomira Lukáčiková                                                                                                                                                                                                                                                                                                                                                                                                                                                                                                                                                                                                                                                                    |                                                                                                           |
| EPI_ISL_1654810, EPI_ISL_1654830                                                                                                                                                                                                                                                                                                                                                                                                                                                                                                                                                                      | Institute of Virology, Vaccines and Sera "Torlak"                                                                                                                              | Institute of microbiology and Immunology, Faculty of Medicine, University of Belgrade                                                          | Jankovic, M.; Jovanovic, T.; Knezevic, A.; Milicevic, O.; Sekler, M.; Tesovic, B.; Vidanovic, D.                                                                                                                                                                                                                                                                                                                                                                                                                                                                                                                                                                                                                                                                                                                                                                                                                                                                                                                                                                                                                                                               |                                                                                                           |
| EPI_ISL_1017684, EPI_ISL_1017686, EPI_ISL_1017688                                                                                                                                                                                                                                                                                                                                                                                                                                                                                                                                                     | Institute of Virology, Vaccines and Sera "Torlak"                                                                                                                              | Institute of microbiology and Immunology, Faculty of Medicine, University of Belgrade                                                          | Jankovic, M.; Jovanovic, T.; Knezevic, A.; Milicevic, O.; Sekler, M.; Tesovic, B.; Vidanovic, D.                                                                                                                                                                                                                                                                                                                                                                                                                                                                                                                                                                                                                                                                                                                                                                                                                                                                                                                                                                                                                                                               |                                                                                                           |
| EPI_ISL_833163                                                                                                                                                                                                                                                                                                                                                                                                                                                                                                                                                                                        | Instituto Adolfo Lutz - Regional de Marília                                                                                                                                    | Instituto Adolfo Lutz, Interdisciplinary Procedures Center, Strategic Laboratory                                                               | Claudia Regina Gonçalves; Claudio Tavares Sacchi; Erica Valessa Ramos Gomes; Karoline Rodrigues Campos                                                                                                                                                                                                                                                                                                                                                                                                                                                                                                                                                                                                                                                                                                                                                                                                                                                                                                                                                                                                                                                         |                                                                                                           |
| EPI_ISL_2614622                                                                                                                                                                                                                                                                                                                                                                                                                                                                                                                                                                                       | Instituto Adolfo Lutz - Regional de Presidente Prudente                                                                                                                        | Instituto Adolfo Lutz, Interdisciplinary Procedures Center, Strategic Laboratory                                                               | Caio Vinicius Dias Lopes; Claudia Regina Gonçalves; Claudio Tavares Sacchi; Erica Valessa Ramos Gomes; Karoline Rodrigues Campos; Leonardo Jose Tadeu de Araujo                                                                                                                                                                                                                                                                                                                                                                                                                                                                                                                                                                                                                                                                                                                                                                                                                                                                                                                                                                                                |                                                                                                           |
| EPI_ISL_984246                                                                                                                                                                                                                                                                                                                                                                                                                                                                                                                                                                                        | Instituto Adolfo Lutz Central                                                                                                                                                  | Instituto Adolfo Lutz, Interdisciplinary Procedures Center, Strategic Laboratory                                                               | Claudia Regina Gonçalves; Claudio Tavares Sacchi; Erica Valessa Ramos Gomes; Karoline Rodrigues Campos                                                                                                                                                                                                                                                                                                                                                                                                                                                                                                                                                                                                                                                                                                                                                                                                                                                                                                                                                                                                                                                         |                                                                                                           |
| EPI_ISL_2344311, EPI_ISL_2344420                                                                                                                                                                                                                                                                                                                                                                                                                                                                                                                                                                      | Instituto Butantan                                                                                                                                                             | Instituto de Medicina Tropical de Sao Paulo                                                                                                    | Brazil-UK Centre for Arbovirus Discovery Diagnosis Genomics and Epidemiology (CADDE) Genomic Network - Instituto de Medicina Tropical                                                                                                                                                                                                                                                                                                                                                                                                                                                                                                                                                                                                                                                                                                                                                                                                                                                                                                                                                                                                                          |                                                                                                           |
| EPI_ISL_491196, EPI_ISL_491207, EPI_ISL_491212                                                                                                                                                                                                                                                                                                                                                                                                                                                                                                                                                        | Instituto Gulbenkian de Ciência                                                                                                                                                | Instituto Gulbenkian de Ciência                                                                                                                | Cathy Paulino; Joao Sobral; João Costa; Ricardo Leite; Susana Ladeiro                                                                                                                                                                                                                                                                                                                                                                                                                                                                                                                                                                                                                                                                                                                                                                                                                                                                                                                                                                                                                                                                                          |                                                                                                           |
| EPI_ISL_2348751, EPI_ISL_2348766, EPI_ISL_2348777                                                                                                                                                                                                                                                                                                                                                                                                                                                                                                                                                     | Instituto Nacional De Investigación En Salud Pública-Crn De Influenza Y Otros Virus Respiratorios                                                                              | NIC-Instituto Nacional de Investigación en Salud Pública                                                                                       | Alfredo Bruno; Domenica de Mora.; Jimmy Garcés; Johanna Laines; Lizbeth Patiño; Manuel Gonzalez; Maritza Olmedo; Michelle Páez                                                                                                                                                                                                                                                                                                                                                                                                                                                                                                                                                                                                                                                                                                                                                                                                                                                                                                                                                                                                                                 |                                                                                                           |
| EPI_ISL_837720                                                                                                                                                                                                                                                                                                                                                                                                                                                                                                                                                                                        | Instituto Nacional de Enfermedades Respiratorias (INER)                                                                                                                        | Instituto Nacional de Enfermedades Respiratorias (INER)                                                                                        | Alejandra Hernández-Terán; Alma Rincón-Rubio; Celia Boukadida; Edgar Sevilla-Reyes; Eduardo Becerril-Vargas; Fidencio Mejía-Nepomuceno; Hector Esteban Paz-Juárez; Joel Armando Vázquez-Pérez; Jorge Salas-Hernández; José Arturo Martínez-Orozco; Margarita Matías-Florentino; Mario Mújica-Sánchez; Olivia Briceño; Santiago Ávila-Ríos                                                                                                                                                                                                                                                                                                                                                                                                                                                                                                                                                                                                                                                                                                                                                                                                                      |                                                                                                           |
| EPI_ISL_574294, EPI_ISL_491950                                                                                                                                                                                                                                                                                                                                                                                                                                                                                                                                                                        | Instituto Nacional de Investigación en Salud Pública                                                                                                                           | Instituto Nacional de Investigación en Salud Pública                                                                                           | Alberto Orlando Narvaez; Alfredo Bruno; Andrés Carrasco; Denisse Portugal; Doménica de Mora Coloma; Leandro Patino Patino; Manuel Gonzalez; Orson Mestanza                                                                                                                                                                                                                                                                                                                                                                                                                                                                                                                                                                                                                                                                                                                                                                                                                                                                                                                                                                                                     |                                                                                                           |
| EPI_ISL_2492549, EPI_ISL_2492604, EPI_ISL_2492663, EPI_ISL_2492696, EPI_ISL_2492728, EPI_ISL_2492780, EPI_ISL_2492786, EPI_ISL_2492787, EPI_ISL_2492788, EPI_ISL_2492789, EPI_ISL_2492799, EPI_ISL_2492803, EPI_ISL_2492810, EPI_ISL_2492818, EPI_ISL_2492822, EPI_ISL_2492826, EPI_ISL_2492847, EPI_ISL_2492847, EPI_ISL_2492882, EPI_ISL_2492915, EPI_ISL_2493087, EPI_ISL_2617133, EPI_ISL_2617181, EPI_ISL_2617182, EPI_ISL_2685951, EPI_ISL_2685957, EPI_ISL_2685960, EPI_ISL_2685973, EPI_ISL_2841653, EPI_ISL_2841654                                                                          | see above                                                                                                                                                                      | CERI, Centre for Epidemic Response and Innoavtion, Stellenbosch University and KRISP, KZN Research Innovation and Sequencing Platform, UKZN.   |                                                                                                                                                                                                                                                                                                                                                                                                                                                                                                                                                                                                                                                                                                                                                                                                                                                                                                                                                                                                                                                                                                                                                                |                                                                                                           |
| EPI_ISL_1347897, EPI_ISL_1545274, EPI_ISL_1545278, EPI_ISL_1545383, EPI_ISL_2494880, EPI_ISL_2494884, EPI_ISL_2494900, EPI_ISL_2609486, EPI_ISL_2609493, EPI_ISL_2609531, EPI_ISL_2609540, EPI_ISL_2609541, EPI_ISL_2609561                                                                                                                                                                                                                                                                                                                                                                           | see above                                                                                                                                                                      | Instituto Nacional de Investigación em Saúde                                                                                                   | Afonso P; David K; Emmanuel SJ; Freitas RH; Giandhari J; Inglês L; Lutucuta S; Miranda J; Morais J; Mufinda M; Naidoo Y; Neto Z; Paulo A Carralero RR Paixão JP; Pereira A; Pillay S; Tegally H; Wilkinson E; de Oliveira T                                                                                                                                                                                                                                                                                                                                                                                                                                                                                                                                                                                                                                                                                                                                                                                                                                                                                                                                    |                                                                                                           |
| EPI_ISL_933521, EPI_ISL_1591655, EPI_ISL_1711328, EPI_ISL_2230812, EPI_ISL_2894314                                                                                                                                                                                                                                                                                                                                                                                                                                                                                                                    | Instituto Nacional de Medicina Genómica                                                                                                                                        | Instituto Nacional de Medicina Genómica                                                                                                        | Alcaraz N; Canseco Mendez JC; Cedro-Tanda A; Cisneros- Villanueva M; Cisneros-Villanueva M; Escobar-Arrazola; Garcia-Cardenas FJ; Gonzalez-Barrera D; Gonzalez-Woge MA; Herrera-Montalvo LA; Herrera-Montalvo LA.; Hidalgo-Miranda A; M; Mendoza-Vargas A; Miranda-Ortiz H; Munguia-Garza P; Peñafoza-Figueroa F; Ramirez-Vega O; Rangel-DeLeon D; Reyes-Grajeda JP; Rosas-Escobar P                                                                                                                                                                                                                                                                                                                                                                                                                                                                                                                                                                                                                                                                                                                                                                           |                                                                                                           |
| EPI_ISL_2500953, EPI_ISL_2500971                                                                                                                                                                                                                                                                                                                                                                                                                                                                                                                                                                      | Instituto Nacional de Salud                                                                                                                                                    | Instituto Nacional de Salud- Dirección de Investigación en Salud Pública                                                                       | Carlos Franco-Muñoz; Carmen Osorio; Diana Malo; Diego A. Álvarez-Díaz; Diego Andrés Prada; Gerardo Santamaría; Hector Alejandro Ruiz-Moreno; Jhonnatan Reales-González; Jorge Rivera; Juan Camilo Martínez; Julian Naizaque; Katherine Laiton-Donato; Lisseth Pardo; Magdalena Wiesner; Marcela Mercado-Reyes; Maria T. Herrera-Sepúlveda; Marta Lopez Blanco; Martha Lucia Ospina Martinez; Paola Rojas; Sergio Gomez; Sheryll Corchuelo; Ángela Alarcón Cruz                                                                                                                                                                                                                                                                                                                                                                                                                                                                                                                                                                                                                                                                                                 |                                                                                                           |
| EPI_ISL_791087, EPI_ISL_791096                                                                                                                                                                                                                                                                                                                                                                                                                                                                                                                                                                        | Instituto Nacional de Salud - Unidad de Secuenciación y Análisis Genómico                                                                                                      | Instituto Nacional de Salud - Dirección de Investigación en Salud Pública                                                                      | Carlos Franco-Muñoz; Diego A. Álvarez-Díaz; Diego Andrés Prada; Gerardo Santamaría; Jonathan Reales; Julian Naizaque; Katherine Laiton-Donato; Magdalena Wiesner; Marcela Mercado-Reyes; Maria T. Herrera; Martha Lucia Ospina Martinez; Mauricio Pacheco-Montealegre; Paola Muñoz-Laiton; Sheryl Corchuelo                                                                                                                                                                                                                                                                                                                                                                                                                                                                                                                                                                                                                                                                                                                                                                                                                                                    |                                                                                                           |

|                                                                                                                                                   |                                                                                               |                                                                                                                                                                                                                                                               |                                                                                                                                                                                                                                                                                                                                                                                                                                                                                                                                                                                                                                                                                                                                                                                                                                               |
|---------------------------------------------------------------------------------------------------------------------------------------------------|-----------------------------------------------------------------------------------------------|---------------------------------------------------------------------------------------------------------------------------------------------------------------------------------------------------------------------------------------------------------------|-----------------------------------------------------------------------------------------------------------------------------------------------------------------------------------------------------------------------------------------------------------------------------------------------------------------------------------------------------------------------------------------------------------------------------------------------------------------------------------------------------------------------------------------------------------------------------------------------------------------------------------------------------------------------------------------------------------------------------------------------------------------------------------------------------------------------------------------------|
| EPI_ISL_941955,<br>EPI_ISL_941986                                                                                                                 | Instituto Nacional de Salud, Bogotá, Colombia                                                 | Centro de Investigaciones en Microbiología y Biotecnología-UR (CIMBIUR), Facultad de Ciencias Naturales, Universidad del Rosario, Bogotá, Colombia Instituto Nacional de Salud, Bogotá, Colombia Icahn School of Medicine at Mount Sinai, New York, USA       | Adriana van de Guchte; Alberto Paniz-Mondolfi; Ana S. Gonzalez-Reiche; Carolina Flórez; Carolina Hernández; Emilia Mia Sordillo; Hala Alejei Alshammary; Harm van Bakel; Jaaeyeta Dutta; Juan David Ramirez; Luz Helena Patiño; Marina Muñoz; Matthew M. Hernandez; Nathalia Ballesteros; Sergio Gomez; Viviana Simon; Zenab Khan                                                                                                                                                                                                                                                                                                                                                                                                                                                                                                             |
| EPI_ISL_447804                                                                                                                                    | Instituto Nacional de Salud, Bogotá, Colombia                                                 | Grupo de Investigaciones Microbiológicas-UR (GIMUR), Departamento de Biología, Facultad de Ciencias Naturales, Universidad del Rosario, Bogotá, Colombia Instituto Nacional de Salud, Bogotá, Colombia Icahn School of Medicine at Mount Sinai, New York, USA | Adriana Castillo; Alberto Paniz-Mondolfi; Ana S. Gonzalez-Reiche; Angelica Rico; Anibal A. Teherán; Carolina Florez; Carolina Hernandez; David Martínez; Emilia Mia Sordillo; Esther C. Barros; Harm van Bakel; Jesús E. Jaimes; Juan David Ramirez; Laura Vega; Lisseth Pardo; Marina Muñoz; Martha L. Ospina; Matthew M. Hernandez; Nathalia Ballesteros; Sergio Castañeda; Sergio Gomez; Viviana Simon                                                                                                                                                                                                                                                                                                                                                                                                                                     |
| EPI_ISL_526967                                                                                                                                    | Instituto Nacional de Salud, Bogotá, Colombia                                                 | Instituto Nacional de Salud, Bogotá, Colombia                                                                                                                                                                                                                 | Astrid C. Flórez; Carlos Andrés Durán; Carlos Franco-Muñoz; Carolina Ferro; Christian Julian Villabona-Arenas; Diana Marcela Walteros-Acero; Diego A. Álvarez-Díaz; Diego Andrés Prada; Franklin Prieto; Jonathan Reales; Jose A. Usme-Ciro; Katherine Laiton-Donato; Liz Villabona-Arenas; Marcela Mercado-Reyes; Martha Lucia Ospina Martinez; Mauricio Pacheco-Montealegre; Sussy Echeverria; Zulma M. Cucunubá                                                                                                                                                                                                                                                                                                                                                                                                                            |
| EPI_ISL_2617100,<br>EPI_ISL_2617116,<br>EPI_ISL_2688576,<br>EPI_ISL_2688577,<br>EPI_ISL_2688578                                                   | Instituto Nacional de Saude (INS), Mozambique                                                 | CERI, Centre for Epidemic Response and Innoation, Stellenbosch University and KRISP, KZN Research Innovation and Sequencing Platform, UKZN.                                                                                                                   | Emmanuel S; Giandhari J; Nadia Siteo; Naidoo Yeshnee; Nalia Ismael; Nedio Mabunda; Paulo Arnaldo; Pillay S; Tegally H; Tshabulula Derek; Wilkinson E; Yajna Ramphal; de Oliveira T                                                                                                                                                                                                                                                                                                                                                                                                                                                                                                                                                                                                                                                            |
| EPI_ISL_887419, EPI_ISL_887429, EPI_ISL_887433, EPI_ISL_887501, EPI_ISL_964947, see above                                                         | Instituto Nacional de Saude (INS), Mozambique                                                 | KRISP, KZN Research Innovation and Sequencing Platform                                                                                                                                                                                                        | Emmanuel S; Giandhari J; Nadia Siteo; Nalia Ismael; Nedio Mabunda; Paulo Arnaldo; Pillay S; Tegally H; Wilkinson E; de Oliveira T                                                                                                                                                                                                                                                                                                                                                                                                                                                                                                                                                                                                                                                                                                             |
| EPI_ISL_2843966                                                                                                                                   | Instituto de Biotecnologia - UNESP-Botucatu-SP                                                | Instituto de Biotecnologia - UNESP-Botucatu-SP                                                                                                                                                                                                                | Cecilia Artico Banho; Cintia Bittar; Fábio Sossai Possebon; Guilherme Campos; Helena Lage Ferreira; Jorge A. Petrolí Marchesi; João Pessoa Araújo Jr.; Leila Sabrina Ullmann; Lívia Sacchetto; Maisa C. Pereira Parra; Marília Moraes; Maurício L. Nogueira; Paula Rahal; Paulo Inacio da Costa                                                                                                                                                                                                                                                                                                                                                                                                                                                                                                                                               |
| EPI_ISL_516625,<br>EPI_ISL_576266,<br>EPI_ISL_576274,<br>EPI_ISL_658893                                                                           | Instituto de Diagnostico y Referencia Epidemiologicos (INDRE)                                 | Instituto de Diagnostico y Referencia Epidemiologicos (INDRE)                                                                                                                                                                                                 | Abril Rodriguez-Maldonado; Adnan Araiza-Rodriguez; Claudia Wong-Arambula; Dayanira Arellano-Suarez; Edgar Mendieta-Condado; Ernesto Ramirez-Gonzalez; Ernesto Ramirez-Gonzalez.; Fabiola Garces-Ayala; Gisela Barrera-Badillo; Gisela Barrera-Badillo.; Irma Lopez-Martinez; Lucia Hernandez-Rivas; Natividad Cruz-Ortiz; Tatiana Nunez-Garcia                                                                                                                                                                                                                                                                                                                                                                                                                                                                                                |
| EPI_ISL_452141                                                                                                                                    | Instituto de Diagnostico y Referencia Epidemiologicos (INDRE)                                 | Instituto de diagnóstico y Referencia Epidemiologicos (INDRE)                                                                                                                                                                                                 | Araiza-Rodriguez Adnan; Barrera-Badillo Gisela; Garces-Ayala Fabiola; Hernandez-Rivas Lucia; Lopez-Martinez Irma.; Mendieta-Condado Edgar; Ramirez-Gonzalez Ernesto; Rodriguez-Maldonado Abril; Wong-Arambula Claudia                                                                                                                                                                                                                                                                                                                                                                                                                                                                                                                                                                                                                         |
| EPI_ISL_1060682,<br>EPI_ISL_1060743,<br>EPI_ISL_1060756,<br>EPI_ISL_1060760,<br>EPI_ISL_1060762                                                   | Instituto de Diagnostico y Referencia Epidemiologicos (INDRE)_RNLS                            | Instituto de Diagnostico y Referencia Epidemiologicos (INDRE)                                                                                                                                                                                                 | Abril Rodriguez-Maldonado; Adnan Araiza-Rodriguez; Claudia Wong-Arambula; David Fragoso-Fonseca; Ernesto Ramirez-Gonzalez.; Fabiola Garces-Ayala; Gisela Barrera-Badillo; Irma Lopez-Martinez; Lucia Hernandez-Rivas; Mayra Jimenez-Morales; Nancy Munoz-Hernandez; Natividad Cruz-Ortiz; Sergio Rangel-Guerrero; Tatiana Nunez-Garcia                                                                                                                                                                                                                                                                                                                                                                                                                                                                                                        |
| EPI_ISL_913933,<br>EPI_ISL_913944,<br>EPI_ISL_913959,<br>EPI_ISL_1054977,<br>EPI_ISL_1168563                                                      | Instituto de Diagnostico y Referencia Epidemiologicos INDRE_RNLS                              | Instituto de Diagnostico y Referencia Epidemiologicos (INDRE)                                                                                                                                                                                                 | Abril Rodriguez-Maldonado; Adnan Araiza-Rodriguez; Ariadna Medina-Benitez; Claudia Wong-Arambula; David Fraquoso-Fonseca; Ernesto Ramirez-Gonzalez.; Fabiola Garces-Ayala; Gisela Barrera-Badillo; Irma Lopez-Martinez; Joaquin Quiroz-Mercado; Lucia Hernandez-Rivas; Mayra Jimenez-Morales; Nancy Munoz-Hernandez; Natividad Cruz-Ortiz; Sergio Rangel-Guerrero; Tatiana Nunez-Garcia; Vanessa Rivero-Arredondo                                                                                                                                                                                                                                                                                                                                                                                                                             |
| EPI_ISL_1301527,<br>EPI_ISL_1301559,<br>EPI_ISL_1301712                                                                                           | Instituto de Diagnostico y Referencia Epidemiologicos INDRE_RNLS                              | Instituto de Biotecnología de la UNAM                                                                                                                                                                                                                         | Alejandra Hernández-Terán; Alejandro Sanchez-Flores; Alma Rincón-Rubio; Andrea Santos Coy-Arechavaleta; Authors from IBT; Blanca Taboada; Celia Boukadida; Clara Esperanza Santacruz-Tinoco; Edgar Mendieta-Condado; Eduardo Becerril-Vargas; Fidencio Mejía-Nepomuceno; Francisco Pulido; Gisela Barrera-Badillo; Gloria Vazquez; Hector Esteban Paz-Juárez; IMSS; InDRE and INER (in alphabetical order); Carlos F. Arias; Irma Lopez-Martinez; Jerome Jean Verleyen; Joel Armando Vázquez-Pérez; Jorge Salas-Hernández; José Arturo Martínez-Orozco; José Ernesto Ramírez-González; José Esteban Fernández-Matano; Lucia Hernandez-Rivas; Luis Alberto Ochoa-Carrera; Margarita Matias-Florentino; Mario Mújica-Sánchez; Natividad Cruz-Ortiz; Pavel Isa; Ricardo Grande; Santiago Avila-Rios; Tatiana Nunez-Garcia; Teresta Rojas-Mendoza |
| EPI_ISL_2776172, EPI_ISL_2776174, EPI_ISL_2776175, EPI_ISL_2776177, EPI_ISL_2776178, EPI_ISL_2776179, EPI_ISL_2776182, EPI_ISL_2776197 see above  | Instituto de Medicina Tropical & Salud Global (IMTSAG)                                        | Grubaguh Lab - Yale School of Public Health                                                                                                                                                                                                                   | Alejandro Vallejo Degaudenzi; Anderson Brito; Annie Watkins; Chaney Kalinich; Chantal Vogels; Elisa Contreras; Esperanza Mendoza; Isabel Ott; Jessica Rothman; Joseph Fauver; Kendall Billig; Mallery Breban; Mary Petrone; Nathan Grubaugh; Robert Paulino-Ramirez; Tara Alpert; Tobias Koch; Victor Virgilio Calderon                                                                                                                                                                                                                                                                                                                                                                                                                                                                                                                       |
| EPI_ISL_3020245,<br>EPI_ISL_3020248,<br>EPI_ISL_3020257,<br>EPI_ISL_3020269                                                                       | Instituto de Medicina Tropical Alexander Von Humboldt, Sede Cusco                             | Laboratorio de Genómica Microbiana, Universidad Peruana Cayetano Heredia                                                                                                                                                                                      | Alejandra Dávila-Barclay; Diego Cuicapuza; Guillermo Salvatierra; Janet Huancachoque; Luis González; Pablo Tsukayama; Pedro E. Romero; Pool Marcos                                                                                                                                                                                                                                                                                                                                                                                                                                                                                                                                                                                                                                                                                            |
| EPI_ISL_729916                                                                                                                                    | Instituto de Medicina Tropical, Universidad Nacional Toribio Rodríguez de Mendoza de Amazonas | Laboratorio de Genómica Microbiana, Universidad Peruana Cayetano Heredia                                                                                                                                                                                      | Alejandra Dávila-Barclay; Brenda Ayzanoa; Carla Montenegro; Cecilia Pajuelo; Janet Huancachoque; Luis González; Pablo Tsukayama; Pedro E. Romero; Pool Marcos; Rafael Tapia; Stella Chenet                                                                                                                                                                                                                                                                                                                                                                                                                                                                                                                                                                                                                                                    |
| EPI_ISL_1627995                                                                                                                                   | Instytut Onkologii                                                                            | 1. National Institute of Public Health - National Institute of Hygiene; 2. Eurofins Genomics Europe Sequencing GmbH                                                                                                                                           | ECDC COVID-19 WGS support team; Eurofins Genomics Europe Sequencing Team; Gierczyński Rafał; Sadkowska-Todys Małgorzata; Wolkowicz Tomasz; Zacharczuk Katarzyna                                                                                                                                                                                                                                                                                                                                                                                                                                                                                                                                                                                                                                                                               |
| EPI_ISL_1652050,<br>EPI_ISL_1652051,<br>EPI_ISL_1652052,<br>EPI_ISL_1652053,<br>EPI_ISL_1652054,<br>EPI_ISL_1652055                               | Integrated Biorepository of H3Africa Uganda - IBRH3AU                                         | Molecular Biology Laboratory                                                                                                                                                                                                                                  | Ashaba Fred Katabazi; Bernard Ssentalo Bagaya; David Patrick Kateete; Edgar Kigozi; Emmanuel Nasinghe; Eric Katagiriya; Gerald Mboowa; Lwanga Newton; Misaki Wayengera; Moses Jobba; Moses Luutu; Nsubuga Gideon; Rogers Kamulegeya; Samuel Kirimunda; Sarah Stanley; Savannah Mwesigwa                                                                                                                                                                                                                                                                                                                                                                                                                                                                                                                                                       |
| EPI_ISL_1919645,<br>EPI_ISL_1919646                                                                                                               | Iphoh Public Health Laboratory (MKAI), Ministry of Health Malaysia                            | Institute for Medical Research, Infectious Disease Research Centre, National Institutes of Health, Ministry of Health Malaysia                                                                                                                                | Kamel K; Mohd Zawawi Z; Suppiah J; Thayan R                                                                                                                                                                                                                                                                                                                                                                                                                                                                                                                                                                                                                                                                                                                                                                                                   |
| EPI_ISL_1919858,<br>EPI_ISL_2650007,<br>EPI_ISL_2815329,<br>EPI_ISL_2815330                                                                       | Iphoh Public Health Laboratory (MKAI), Ministry of Health Malaysia                            | Institute for Medical Research, Infectious Disease Research Centre, National Institutes of Health, Ministry of Health Malaysia                                                                                                                                | Azizan MA; Kamel K; Mohd Zawawi Z; Ramly N; Robert F; Suppiah J; Thayan R                                                                                                                                                                                                                                                                                                                                                                                                                                                                                                                                                                                                                                                                                                                                                                     |
| EPI_ISL_2795660,<br>EPI_ISL_3038900                                                                                                               | Iran University of Medical Sciences, Tehran, Iran                                             | Genetics Research Center, University of Social Welfare and Rehabilitation Sciences                                                                                                                                                                            | Farah Bokharaei-Salimi; Hossein Najmabadi.; Kimia Kahrizi; Marzieh Mohseni; Seyed Jalal Kiani; Tahereh Donyavi; Zohreh Fattahi                                                                                                                                                                                                                                                                                                                                                                                                                                                                                                                                                                                                                                                                                                                |
| EPI_ISL_1697387                                                                                                                                   | Iressef / LBV                                                                                 | Iressef Genomics lab                                                                                                                                                                                                                                          | Abdou PADANE; Adjiratou Aissatou BA; Alioune TINE; Amroise AHOUIDI; Aminata DIA; Aminata MBOUP; Anna Julienne Selbe NDIAYE; Assane DIENG; Astou Gaye GAYE; Barada CISSE; Birahim Piere NDIAYE; Gora LO; Khadim GUEYE; Makhtar Camara; Mengue FALL; Moustapha MBOW; Nafisatou LEYE; Ndeye Coumba Toure KANE; OUMY DIOP; Papa Alassane DIAW; Pauline SENE; SADA DIALLO; Serigne Mbaye Lo NDIAYE; Souleymane MBOUP; Yacine DIA                                                                                                                                                                                                                                                                                                                                                                                                                   |
| EPI_ISL_2620888, EPI_ISL_2620889, EPI_ISL_2873822, EPI_ISL_2873823, EPI_ISL_2873828, EPI_ISL_2873829, EPI_ISL_2873833, EPI_ISL_2873834, see above | Iressef Genomics lab                                                                          | IRESEEF                                                                                                                                                                                                                                                       | Abdou PADANE; Amroise AHOUIDI; Aminata DIA; Aminata MBOUP; Astou Gaye GAYE; Barada CISSE; Birahim Piere NDIAYE; Diabou Digne; Gora LO; Khadim GUEYE; Moustapha MBOW; Nafisatou LEYE; Ndeye Coumba Toure KANE; Papa Alassane DIAW; Samba Ndouir; Seni Ndiaye; Souleymane MBOUP; Yacine DIA                                                                                                                                                                                                                                                                                                                                                                                                                                                                                                                                                     |
| EPI_ISL_1167146                                                                                                                                   | Iressef Genomics lab                                                                          | L'institut de Recherche en Santé, de Surveillance Epidémiologique et de Formation (IRESEEF)                                                                                                                                                                   | Abdou PADANE; Abdoulie KANTEH; Abdul Karim SESAY; Amroise AHOUIDI; Aminata DIA; Aminata MBOUP; Astou Gaye GAYE; Barada CISSE; Birahim Piere NDIAYE; Gora LO; Khadim GUEYE; Moustapha MBOW; Nafisatou LEYE; Ndeye Coumba Toure KANE; Papa Alassane DIAW; Souleymane MBOUP; Yacine DIA                                                                                                                                                                                                                                                                                                                                                                                                                                                                                                                                                          |
| EPI_ISL_2779373                                                                                                                                   | Isebania Sub County Hospital                                                                  | USAMRA-A, Basic Science Laboratory                                                                                                                                                                                                                            | Alan Lemtudo; Beth Mutai; Brian Andika; Carol Kifude; Clement Masakwe; Eric Muthanje; Esther Omuseni; Faith Sigel; Gathii Kimita; George Awinda; John Waitumbi; Josphat Nyataya; Rachel Githii; Rehema Liyai; Stephen Ochola                                                                                                                                                                                                                                                                                                                                                                                                                                                                                                                                                                                                                  |
| EPI_ISL_419299,<br>EPI_ISL_419300                                                                                                                 | Ishikawa Prefectural Institute of Public Health and Environmental Science                     | Pathogen Genomics Center, National Institute of Infectious Diseases                                                                                                                                                                                           | Eri Nariai; Hajime Kamiya; Kentaro Itokawa; Makoto Kuroda; Masanori Hashino; Motoi Suzuki; Rina Tanaka; Sanae Kuramoto; Tsuyoshi Sekizuka                                                                                                                                                                                                                                                                                                                                                                                                                                                                                                                                                                                                                                                                                                     |
| EPI_ISL_2505234,<br>EPI_ISL_2508151,<br>EPI_ISL_2508154                                                                                           | Islab, Pohjois-Savon aluelaboratorio                                                          | Expert Microbiology, National Institute for Health and Welfare                                                                                                                                                                                                | Carita Savolainen-Kopra; Erika Lindh; Haider al-Hello; Jani Halkilahti; Kirsi Liitsola; Niina Konen; Olli Vapalahti; Pekka Elonen; Phuoc Truong; Päivi Laurila; Ravi Kant; Sari Hannula; Soile Blomqvist; Teemu Smura                                                                                                                                                                                                                                                                                                                                                                                                                                                                                                                                                                                                                         |
| EPI_ISL_1240650                                                                                                                                   | Israel Central Virology Laboratory                                                            | Israel National Consortium for SARS-CoV-2 sequencing                                                                                                                                                                                                          | Assaf Rokney; Dana Bar-Ilan; David A. Zeevi; Efrat Dahan Bucris; Efrat Glick-Saar; Efrat Rorman; Ella Mendelson; Ephraim Fass; Eva Nachum; Gal Zizelski Valenci; Gideon Rechavi; Israel Nissan; Joseph Jaffe; Maya Davidovich Cohen; Michal Mandelboim; Mor Rubinstein; Neta Zuckerman; Omer Murik; Omri Nayshool; Oran Erster; Orna Mor; Tzvia Mann                                                                                                                                                                                                                                                                                                                                                                                                                                                                                          |
| EPI_ISL_474989,<br>EPI_ISL_516889,<br>EPI_ISL_516900,<br>EPI_ISL_575334,<br>EPI_ISL_649094,<br>EPI_ISL_776862                                     | Israel Central Virology laboratory                                                            | Israel Central Virology laboratory                                                                                                                                                                                                                            | Efrat Dahan Bucris; Ella Mendelson; Michal Mandelboim; Neta Zuckerman; Oran Erster; Orna Mor                                                                                                                                                                                                                                                                                                                                                                                                                                                                                                                                                                                                                                                                                                                                                  |
| EPI_ISL_944436, EPI_ISL_1073463, EPI_ISL_1209484, EPI_ISL_1209811, EPI_ISL_2084501, EPI_ISL_2085005, EPI_ISL_2085242, EPI_ISL_2085776, see above  | Israel Central Virology laboratory                                                            | Israel National Consortium for SARS-CoV-2 sequencing                                                                                                                                                                                                          | Assaf Rokney; Dana Bar-Ilan; David A. Zeevi; Efrat Dahan Bucris; Efrat Glick-Saar; Efrat Rorman; Ella Mendelson; Ephraim Fass; Eva Nachum; Gal Zizelski Valenci; Gideon Rechavi; Israel Nissan; Joseph Jaffe; Maya Davidovich Cohen; Michal Mandelboim; Miranda Davide Cacchiarelli; Antonio Limone; Biancamaria Pierri; Chiara Colantuono; Davide Cacchiarelli.; Denise Di Concilio; Francesco Panariello; Lucio Di Filippo; Marcello Salvi; Maria Concetta Cuomo; Patrizia Annunziata; Pellegrino Cerino; Valentina Bouche                                                                                                                                                                                                                                                                                                                  |
| EPI_ISL_1670660                                                                                                                                   | Istituto Zooprofilattico Sperimentale Umbria e Marche "Togo Rosati"                           | Istituto Zooprofilattico Sperimentale dell'Abruzzo e Molise "G. Caporale"                                                                                                                                                                                     | Ancora M; Biagetti M; Calistri P; Cammà C; Caporale M; Curini V; Delli Compagni E; Di Domenico M; Di Lollo Valeria; Di Pasquale A; Giammarioli M; Lorusso A; Mangone I; Marcacci M; Puglia I; Rinaldi A; Savini G; Scialabba S                                                                                                                                                                                                                                                                                                                                                                                                                                                                                                                                                                                                                |
| EPI_ISL_837247,<br>EPI_ISL_1039312,<br>EPI_ISL_1759528,<br>EPI_ISL_2227133,                                                                       | Istituto Zooprofilattico Sperimentale del Mezzogiorno                                         | TIGEM                                                                                                                                                                                                                                                         | Andrea Ballabio; Anna Manfredi; Antonio Grimaldi; Antonio Grimaldi; Patrizia Annunziata; Francesco Panariello; Biancamaria Pierri; Claudia Tiberio; Teresa Giuliano; Valentina Bouche; Chiara Colantuono; Maria Concetta Cuomo; Denise Di Concilio; Lucio Di Filippo; Anna Manfredi; Marcello Salvi; Antonio Limone; Luigi Atripaldi; Pellegrino Cerino; Andrea Ballabio; Davide Cacchiarelli; Antonio Limone; Biancamaria Pierri; Chiara Colantuono; Davide Cacchiarelli.; Denise Di Concilio; Francesco Panariello; Lucio Di Filippo; Marcello Salvi; Maria Concetta Cuomo; Patrizia Annunziata; Pellegrino Cerino; Valentina Bouche                                                                                                                                                                                                        |

|                                                                                                                                                                                                                                                                                                                                                                                                                                                                                                                                                                                                                                                                                                                                                                                                                                                                                                                                                                                                                                                                                                                                                                                                                                                                                                                                                                                                                                                                                                                                                                                                                                                                                                                                                                                                                                                                                                                                                                                                                                                                                                                                                                                                                                                                                                                                                                                                                                                                                                                                                                                                    |                                                                                                                                                                                                                                              |                                                                                                                                                                                                                                                                                                                      |                                                                                                                                                                                                                                                                                                                                                                                                                                                                                                                                                                                                                                                                                                                                                                                                                                                                                                                              |
|----------------------------------------------------------------------------------------------------------------------------------------------------------------------------------------------------------------------------------------------------------------------------------------------------------------------------------------------------------------------------------------------------------------------------------------------------------------------------------------------------------------------------------------------------------------------------------------------------------------------------------------------------------------------------------------------------------------------------------------------------------------------------------------------------------------------------------------------------------------------------------------------------------------------------------------------------------------------------------------------------------------------------------------------------------------------------------------------------------------------------------------------------------------------------------------------------------------------------------------------------------------------------------------------------------------------------------------------------------------------------------------------------------------------------------------------------------------------------------------------------------------------------------------------------------------------------------------------------------------------------------------------------------------------------------------------------------------------------------------------------------------------------------------------------------------------------------------------------------------------------------------------------------------------------------------------------------------------------------------------------------------------------------------------------------------------------------------------------------------------------------------------------------------------------------------------------------------------------------------------------------------------------------------------------------------------------------------------------------------------------------------------------------------------------------------------------------------------------------------------------------------------------------------------------------------------------------------------------|----------------------------------------------------------------------------------------------------------------------------------------------------------------------------------------------------------------------------------------------|----------------------------------------------------------------------------------------------------------------------------------------------------------------------------------------------------------------------------------------------------------------------------------------------------------------------|------------------------------------------------------------------------------------------------------------------------------------------------------------------------------------------------------------------------------------------------------------------------------------------------------------------------------------------------------------------------------------------------------------------------------------------------------------------------------------------------------------------------------------------------------------------------------------------------------------------------------------------------------------------------------------------------------------------------------------------------------------------------------------------------------------------------------------------------------------------------------------------------------------------------------|
| EPI_ISL_2455775<br>EPI_ISL_1632906,<br>EPI_ISL_2143715,<br>EPI_ISL_2144052                                                                                                                                                                                                                                                                                                                                                                                                                                                                                                                                                                                                                                                                                                                                                                                                                                                                                                                                                                                                                                                                                                                                                                                                                                                                                                                                                                                                                                                                                                                                                                                                                                                                                                                                                                                                                                                                                                                                                                                                                                                                                                                                                                                                                                                                                                                                                                                                                                                                                                                         | Istituto Zooprofilattico Sperimentale del Mezzogiorno                                                                                                                                                                                        | Telitheton Institute of Genetics and Medicine (TIGEM)                                                                                                                                                                                                                                                                | Antonio Grimaldi Patrizia Annunziata Francesco Panariello Biancamaria Pierr Claudia Tiberio Teresa Giuliano Valentina Bouche Chiara Colantuono Maria Concetta Cuomo Denise Di Concilio Lucio Di Filippo Anna Manfredi Marcello Salvi Antonio Limone Luigi Atripaldi Pellegrino Cerino Andrea Ballabio Davide Cacchiarelli                                                                                                                                                                                                                                                                                                                                                                                                                                                                                                                                                                                                    |
| EPI_ISL_1390714                                                                                                                                                                                                                                                                                                                                                                                                                                                                                                                                                                                                                                                                                                                                                                                                                                                                                                                                                                                                                                                                                                                                                                                                                                                                                                                                                                                                                                                                                                                                                                                                                                                                                                                                                                                                                                                                                                                                                                                                                                                                                                                                                                                                                                                                                                                                                                                                                                                                                                                                                                                    | Istituto Zooprofilattico Sperimentale del Mezzogiorno - Azienda Ospedaliera "Pugliese Ciacchio" di Catanzaro                                                                                                                                 | TIGEM                                                                                                                                                                                                                                                                                                                | Andrea Ballabio; Anna Manfredi; Antonio Grimaldi; Antonio Limone Pasquale Minchella Luigi Atripaldi Pellegrino Cerino; Biancamaria Pierr Claudia Tiberio Valentina Bouche; Chiara Colantuono; Davide Cacchiarelli; Denise Di Concilio; Francesco Panariello; Lucio Di Filippo; Marcello Salvi; Maria Concetta Cuomo; Patrizia Annunziata                                                                                                                                                                                                                                                                                                                                                                                                                                                                                                                                                                                     |
| EPI_ISL_1298481<br>EPI_ISL_2272918<br>EPI_ISL_2844844<br>EPI_ISL_2984226,<br>EPI_ISL_2984232,<br>EPI_ISL_2984244<br>EPI_ISL_450793                                                                                                                                                                                                                                                                                                                                                                                                                                                                                                                                                                                                                                                                                                                                                                                                                                                                                                                                                                                                                                                                                                                                                                                                                                                                                                                                                                                                                                                                                                                                                                                                                                                                                                                                                                                                                                                                                                                                                                                                                                                                                                                                                                                                                                                                                                                                                                                                                                                                 | Ivano-Frankivsk CCH#1<br>JIPMER Puducherry<br>Jaber Quarantine<br>Jahra Hospital<br>Jamaica Ministry of Health and Wellness                                                                                                                  | The Institute of Molecular Biology and Genetics of NASU<br>inStem NCBS - INSACOG<br>Virology Lab, Jaber Al Ahmad Al Sabah Hospital<br>Kuwait Cancer Control Center<br>Pathogen Discovery, Respiratory Viruses Branch, Division of Viral Diseases, Centers for Disease Control and Prevention                         | M.Tukalo et al.<br>Uma Ramakrishnan Dasaradhi Palakodeti Aswin SaiNarain<br>Adil Afridi; Dr. Ebaa Al-Awadhi; Dr. Zahrah Buhamad; Haroon Masih<br>Mona Alateeqi; Shakir Bahzad<br>Anna Montmayeur; Anna Uehara; Bettina Bankamp; Clinton R. Paden; Haibin Wang; Jing Zhang; Krista Queen; Rachel Marine; Suxiang Tong; Yan Li; Ying Tao; Zachary Weiner                                                                                                                                                                                                                                                                                                                                                                                                                                                                                                                                                                       |
| EPI_ISL_779255, EPI_ISL_779261, EPI_ISL_779263, EPI_ISL_779281, EPI_ISL_779283,<br>see above                                                                                                                                                                                                                                                                                                                                                                                                                                                                                                                                                                                                                                                                                                                                                                                                                                                                                                                                                                                                                                                                                                                                                                                                                                                                                                                                                                                                                                                                                                                                                                                                                                                                                                                                                                                                                                                                                                                                                                                                                                                                                                                                                                                                                                                                                                                                                                                                                                                                                                       | Jamil-ur-Rahman Center for Genome Research, Dr. Panjiwani Center for Molecular Medicine and Drug Research                                                                                                                                    | Jamil-ur-Rahman Center for Genome Research, Dr. Panjiwani Center for Molecular Medicine and Drug Research                                                                                                                                                                                                            | A.H.; Ain, N.; Ansari, S.; Hashmi; I.A.; Irfan, M.; Khan; Khan, I.; Nisa, Z.; Rashid, M.; Shakeel, M.; Siddiqui, S.                                                                                                                                                                                                                                                                                                                                                                                                                                                                                                                                                                                                                                                                                                                                                                                                          |
| EPI_ISL_2662827<br>see above                                                                                                                                                                                                                                                                                                                                                                                                                                                                                                                                                                                                                                                                                                                                                                                                                                                                                                                                                                                                                                                                                                                                                                                                                                                                                                                                                                                                                                                                                                                                                                                                                                                                                                                                                                                                                                                                                                                                                                                                                                                                                                                                                                                                                                                                                                                                                                                                                                                                                                                                                                       | Jamil-ur-Rahman Center for Genome Research, Dr. Panjiwani Center for Molecular Medicine and Drug Research, International Center for Chemical and Biological Sciences, University of Karachi                                                  | Jamil-ur-Rahman Center for Genome Research, Dr. Panjiwani Center for Molecular Medicine and Drug Research, International Center for Chemical and Biological Sciences, University of Karachi                                                                                                                          | Ain, Nu.; B.T.; I.A.; Iqbal, W.; Irfan, M.; Jahan, S.; Javed; Kakar, N.; Khan, S.; Nisa, Zu.; Rehman, Z.; S. and Khan; Sarwar, B.; Shakeel, M.; Siddiqi; Zehra, M.                                                                                                                                                                                                                                                                                                                                                                                                                                                                                                                                                                                                                                                                                                                                                           |
| EPI_ISL_2779319, EPI_ISL_2779320, EPI_ISL_3031392, EPI_ISL_3031395, EPI_ISL_3031423, EPI_ISL_3031426, EPI_ISL_3031427, EPI_ISL_3031429, EPI_ISL_3031432, EPI_ISL_3031433                                                                                                                                                                                                                                                                                                                                                                                                                                                                                                                                                                                                                                                                                                                                                                                                                                                                                                                                                                                                                                                                                                                                                                                                                                                                                                                                                                                                                                                                                                                                                                                                                                                                                                                                                                                                                                                                                                                                                                                                                                                                                                                                                                                                                                                                                                                                                                                                                           | Jaramogi Oginga Odinga Teaching and Referral Hospital<br>Jessa<br>Joaquim Chaves Saude                                                                                                                                                       | USAMRD-A, Basic Science Laboratory<br>Jessa<br>Instituto Nacional de Saude (INSA)                                                                                                                                                                                                                                    | Alan Lemtudo; Beth Mutai; Brian Andika; Carol Kifude; Clement Masakwe; Eric Muthanje; Esther Omuseni; Faith Sigei; Gathii Kimita; George Awinda; John Waitumbi; Josphat Nyataya; Rachel Githii; Rehema Liyai; Stephen Ochola<br>Berden et al. on behalf of the Jessa_cmdLab<br>Borges et al                                                                                                                                                                                                                                                                                                                                                                                                                                                                                                                                                                                                                                  |
| EPI_ISL_2248928<br>EPI_ISL_2885164<br>EPI_ISL_2932611,<br>EPI_ISL_2932615,<br>EPI_ISL_2932618<br>EPI_ISL_2271955                                                                                                                                                                                                                                                                                                                                                                                                                                                                                                                                                                                                                                                                                                                                                                                                                                                                                                                                                                                                                                                                                                                                                                                                                                                                                                                                                                                                                                                                                                                                                                                                                                                                                                                                                                                                                                                                                                                                                                                                                                                                                                                                                                                                                                                                                                                                                                                                                                                                                   | Johns Hopkins Hospital Department of Pathology<br>Jordan University of Science Technology/ Irbid filed Hospital/ MOH<br>Joubert Clinic                                                                                                       | Johns Hopkins Hospital Department of Pathology<br>Princess Haya Biotechnology Center/ Jordan University of Science Technology<br>National Institute for Communicable Diseases of the National Health Laboratory Service                                                                                              | Adannaya Amadi; C. Paul Morris; Chun Huai Luo; Heba H. Mostafa; Matthew Schwartz; Nicholas Gallagher<br>Areej Alquran; Emad Abu Yaqeen; Hazem Haddad; Maha Karam; Saied Jaradat; Shereen Issa; Suha Hasan<br>Amoako DG; Bhiman JN; Ismail A; Mahlangu B; Mohale T; Ntuli N; Scheepers C                                                                                                                                                                                                                                                                                                                                                                                                                                                                                                                                                                                                                                      |
| EPI_ISL_2779335<br>EPI_ISL_2779337, EPI_ISL_2779455, EPI_ISL_2779456, EPI_ISL_2779547, EPI_ISL_3031383, EPI_ISL_3031385, EPI_ISL_3031407, EPI_ISL_3031413, EPI_ISL_3031417<br>see above                                                                                                                                                                                                                                                                                                                                                                                                                                                                                                                                                                                                                                                                                                                                                                                                                                                                                                                                                                                                                                                                                                                                                                                                                                                                                                                                                                                                                                                                                                                                                                                                                                                                                                                                                                                                                                                                                                                                                                                                                                                                                                                                                                                                                                                                                                                                                                                                            | KCRH KEMRI-DEID Surveillance Site<br>KCRH KEMRI/DEID Surveillance Site<br>KEMRI<br>KEMRI Center for Biotechnology Research and Development                                                                                                   | USAMRD-A, Basic Science Laboratory<br>USAMRD-A, Basic Science Laboratory<br>KEMRI & ICGEB<br>KEMRI-Wellcome Trust Research Programme, Kilifi                                                                                                                                                                         | Alan Lemtudo; Beth Mutai; Brian Andika; Carol Kifude; Clement Masakwe; Eric Muthanje; Esther Omuseni; Faith Sigei; Gathii Kimita; George Awinda; John Waitumbi; Josphat Nyataya; Rachel Githii; Rehema Liyai; Stephen Ochola<br>Alessandro Marcello; Emanuele Orsini; Eric A Lelo; Janet Majanja; Samwel L Symekher; Silvanos M Opana; Wadegu Meshack; Wallace D Bulimo<br>; Githinji G.; Matoke D.; Mburu M.W.; Mohamed K.S.; Onyango C.; de Laurent Z.                                                                                                                                                                                                                                                                                                                                                                                                                                                                     |
| EPI_ISL_2602986,<br>EPI_ISL_2602988,<br>EPI_ISL_2602989,<br>EPI_ISL_2602990,<br>EPI_ISL_2602991,<br>EPI_ISL_2602992<br>EPI_ISL_2602781, EPI_ISL_2602794, EPI_ISL_2602797, EPI_ISL_2602799, EPI_ISL_2602807, EPI_ISL_2602814, EPI_ISL_2602816, EPI_ISL_2602817, EPI_ISL_2602822, EPI_ISL_2602838, EPI_ISL_2602856, EPI_ISL_2602877, EPI_ISL_2602891, EPI_ISL_2602918, EPI_ISL_2602919, EPI_ISL_2602920, EPI_ISL_2602923, EPI_ISL_2602925, EPI_ISL_2602927, EPI_ISL_2602930, EPI_ISL_2602932, EPI_ISL_2602933,<br>EPI_ISL_2602938, EPI_ISL_2602944, EPI_ISL_2602945, EPI_ISL_2602946, EPI_ISL_2602947, EPI_ISL_2602949, EPI_ISL_2602949, EPI_ISL_2602951<br>see above                                                                                                                                                                                                                                                                                                                                                                                                                                                                                                                                                                                                                                                                                                                                                                                                                                                                                                                                                                                                                                                                                                                                                                                                                                                                                                                                                                                                                                                                                                                                                                                                                                                                                                                                                                                                                                                                                                                                | KEMRI-CGHR<br>KEMRI-CGMR-C                                                                                                                                                                                                                   | KEMRI-Wellcome Trust Research Programme, Kilifi<br>KEMRI-Wellcome Trust Research Programme/KEMRI-CGMR-C Kilifi                                                                                                                                                                                                       | ; Githinji G.; Matoke D.; Mburu M.W.; Mohamed K.S.; Onyango C.; de Laurent Z.<br>Githinji G. et al 2020                                                                                                                                                                                                                                                                                                                                                                                                                                                                                                                                                                                                                                                                                                                                                                                                                      |
| EPI_ISL_457866,<br>EPI_ISL_457876,<br>EPI_ISL_457906<br>EPI_ISL_1440093, EPI_ISL_1440096, EPI_ISL_1440106, EPI_ISL_1440115, EPI_ISL_1440118, EPI_ISL_1440122, EPI_ISL_1440257, EPI_ISL_1440319, EPI_ISL_1610444, EPI_ISL_1610516, EPI_ISL_1610567, EPI_ISL_2602477, EPI_ISL_2602480, EPI_ISL_2602508, EPI_ISL_2602519, EPI_ISL_2602520, EPI_ISL_2602521, EPI_ISL_2602522, EPI_ISL_2602527, EPI_ISL_2602528, EPI_ISL_2602529, EPI_ISL_2602531, EPI_ISL_2602534, EPI_ISL_2602549, EPI_ISL_2602553, EPI_ISL_2602557, EPI_ISL_2602559, EPI_ISL_2602560, EPI_ISL_2602566, EPI_ISL_2602570, EPI_ISL_2602571, EPI_ISL_2602572, EPI_ISL_2602583, EPI_ISL_2602594, EPI_ISL_2602596, EPI_ISL_2602597, EPI_ISL_2602598, EPI_ISL_2602602, EPI_ISL_2602605, EPI_ISL_2602607, EPI_ISL_2602610, EPI_ISL_2602612, EPI_ISL_2602620, EPI_ISL_2602625, EPI_ISL_2602635, EPI_ISL_2602637, EPI_ISL_2602643, EPI_ISL_2602644, EPI_ISL_2602647, EPI_ISL_2602650, EPI_ISL_2602657, EPI_ISL_2602659, EPI_ISL_2602660, EPI_ISL_2602661, EPI_ISL_2602662, EPI_ISL_2602663, EPI_ISL_2602667, EPI_ISL_2602674, EPI_ISL_2602681, EPI_ISL_2602683, EPI_ISL_2602684, EPI_ISL_2602686, EPI_ISL_2602687, EPI_ISL_2602688, EPI_ISL_2602689, EPI_ISL_2602695, EPI_ISL_2602697, EPI_ISL_2602698, EPI_ISL_2602699, EPI_ISL_2602700, EPI_ISL_2602701, EPI_ISL_2602703, EPI_ISL_2602706, EPI_ISL_2602713, EPI_ISL_2602714, EPI_ISL_2602716, EPI_ISL_2602723, EPI_ISL_2602730, EPI_ISL_2602745, EPI_ISL_2602748, EPI_ISL_2602749, EPI_ISL_2602750, EPI_ISL_2602751, EPI_ISL_2602753, EPI_ISL_2602754, EPI_ISL_2602762, EPI_ISL_2602763, EPI_ISL_2602996, EPI_ISL_2603012, EPI_ISL_2603021, EPI_ISL_2603021, EPI_ISL_2603036, EPI_ISL_2603038, EPI_ISL_2603039, EPI_ISL_2603040, EPI_ISL_2603041, EPI_ISL_2603044, EPI_ISL_2603045, EPI_ISL_2603047, EPI_ISL_2603048, EPI_ISL_2603049, EPI_ISL_2603050, EPI_ISL_2603052, EPI_ISL_2603053, EPI_ISL_2603055, EPI_ISL_2603056, EPI_ISL_2603058, EPI_ISL_2603059, EPI_ISL_2603061, EPI_ISL_2603063, EPI_ISL_2603066, EPI_ISL_2603067, EPI_ISL_2603068, EPI_ISL_2603069, EPI_ISL_2603070, EPI_ISL_2603071, EPI_ISL_2603072, EPI_ISL_2603074, EPI_ISL_2603075, EPI_ISL_2603078, EPI_ISL_2603082, EPI_ISL_2603085, EPI_ISL_2603086, EPI_ISL_2603088, EPI_ISL_2603089, EPI_ISL_2603091, EPI_ISL_2603093, EPI_ISL_2603095, EPI_ISL_2603096, EPI_ISL_2603097, EPI_ISL_2603099, EPI_ISL_2603103, EPI_ISL_2603104, EPI_ISL_2603105, EPI_ISL_2603106, EPI_ISL_2603108, EPI_ISL_2603111, EPI_ISL_2603113, EPI_ISL_2603115, EPI_ISL_2603118, EPI_ISL_2603119, EPI_ISL_2603120, EPI_ISL_2603121<br>see above | KEMRI-Wellcome Trust Research Programme, Kilifi<br>KEMRI-Wellcome Trust Research Programme, Kilifi                                                                                                                                           | KEMRI-Wellcome Trust Research Programme, Kilifi<br>KEMRI-Wellcome Trust Research Programme, Kilifi                                                                                                                                                                                                                   | ; Githinji G.; Matoke D.; Mburu M.W.; Mohamed K.S.; Onyango C.; Thiongo K.; de Laurent Z.                                                                                                                                                                                                                                                                                                                                                                                                                                                                                                                                                                                                                                                                                                                                                                                                                                    |
| EPI_ISL_568715, EPI_ISL_568863, EPI_ISL_806550, EPI_ISL_806561, EPI_ISL_806574, EPI_ISL_806617, EPI_ISL_806638, EPI_ISL_806643, EPI_ISL_806653, EPI_ISL_806667, EPI_ISL_806704, EPI_ISL_806705, EPI_ISL_855336, EPI_ISL_855337, EPI_ISL_855344, EPI_ISL_855348, EPI_ISL_968817, EPI_ISL_968822, EPI_ISL_968850, EPI_ISL_968922, EPI_ISL_968961, EPI_ISL_968992, EPI_ISL_968993, EPI_ISL_969014, EPI_ISL_969074, EPI_ISL_1039226, EPI_ISL_1039228<br>see above                                                                                                                                                                                                                                                                                                                                                                                                                                                                                                                                                                                                                                                                                                                                                                                                                                                                                                                                                                                                                                                                                                                                                                                                                                                                                                                                                                                                                                                                                                                                                                                                                                                                                                                                                                                                                                                                                                                                                                                                                                                                                                                                      | KEMRI-Wellcome Trust Research Programme/KEMRI-CGMR-C Kilifi<br>KEMRI-Wellcome Trust Research Programme/KEMRI-CGMR-C Kilifi                                                                                                                   | KEMRI-Wellcome Trust Research Programme/KEMRI-CGMR-C Kilifi<br>KEMRI-Wellcome Trust Research Programme/KEMRI-CGMR-C Kilifi                                                                                                                                                                                           | Githinji et al; Githinji et al 2020                                                                                                                                                                                                                                                                                                                                                                                                                                                                                                                                                                                                                                                                                                                                                                                                                                                                                          |
| EPI_ISL_2779322,<br>EPI_ISL_2779323<br>EPI_ISL_3031404,<br>EPI_ISL_3031405<br>EPI_ISL_2779325,<br>EPI_ISL_2779348<br>EPI_ISL_2779362,<br>EPI_ISL_2779376                                                                                                                                                                                                                                                                                                                                                                                                                                                                                                                                                                                                                                                                                                                                                                                                                                                                                                                                                                                                                                                                                                                                                                                                                                                                                                                                                                                                                                                                                                                                                                                                                                                                                                                                                                                                                                                                                                                                                                                                                                                                                                                                                                                                                                                                                                                                                                                                                                           | KEMRI/DEID Surveillance Site (Isebani Sub-County Hospital)<br>KEMRI/DEID Surveillance Site (Kombewa Sub County Hospital)<br>KEMRI/DEID Surveillance Site (Lamu County Hospital)<br>KEMRI/DEID Surveillance Site (Mtongwe Navy Base Hospital) | USAMRD-A, Basic Science Laboratory<br>USAMRD-A, Basic Science Laboratory<br>USAMRD-A, Basic Science Laboratory<br>USAMRD-A, Basic Science Laboratory                                                                                                                                                                 | Alan Lemtudo; Beth Mutai; Brian Andika; Carol Kifude; Clement Masakwe; Eric Muthanje; Esther Omuseni; Faith Sigei; Gathii Kimita; George Awinda; John Waitumbi; Josphat Nyataya; Rachel Githii; Rehema Liyai; Stephen Ochola<br>Alan Lemtudo; Beth Mutai; Brian Andika; Carol Kifude; Clement Masakwe; Eric Muthanje; Esther Omuseni; Faith Sigei; Gathii Kimita; George Awinda; John Waitumbi; Josphat Nyataya; Rachel Githii; Rehema Liyai; Stephen Ochola<br>Alan Lemtudo; Beth Mutai; Brian Andika; Carol Kifude; Clement Masakwe; Eric Muthanje; Esther Omuseni; Faith Sigei; Gathii Kimita; George Awinda; John Waitumbi; Josphat Nyataya; Rachel Githii; Rehema Liyai; Stephen Ochola<br>Alan Lemtudo; Beth Mutai; Brian Andika; Carol Kifude; Clement Masakwe; Eric Muthanje; Esther Omuseni; Faith Sigei; Gathii Kimita; George Awinda; John Waitumbi; Josphat Nyataya; Rachel Githii; Rehema Liyai; Stephen Ochola |
| EPI_ISL_2382194, EPI_ISL_2382195, EPI_ISL_2382197, EPI_ISL_2382198, EPI_ISL_2382200, EPI_ISL_2382201, EPI_ISL_2382202, EPI_ISL_2382203, EPI_ISL_2382204, EPI_ISL_2382205, EPI_ISL_2382209, EPI_ISL_2382210, EPI_ISL_2382214, EPI_ISL_2382217, EPI_ISL_2382702, EPI_ISL_2382710, EPI_ISL_2382715, EPI_ISL_2382720, EPI_ISL_2382725, EPI_ISL_2582845, EPI_ISL_2582848, EPI_ISL_2582868, EPI_ISL_2582870, EPI_ISL_2582872, EPI_ISL_2582885, EPI_ISL_2582963, EPI_ISL_2582977, EPI_ISL_2662665, EPI_ISL_2662678, EPI_ISL_2662685, EPI_ISL_2662699, EPI_ISL_2662700, EPI_ISL_2984802, EPI_ISL_2984803, EPI_ISL_2984804, EPI_ISL_2984805, EPI_ISL_2984806, EPI_ISL_2984807, EPI_ISL_2984808, EPI_ISL_2984809<br>see above                                                                                                                                                                                                                                                                                                                                                                                                                                                                                                                                                                                                                                                                                                                                                                                                                                                                                                                                                                                                                                                                                                                                                                                                                                                                                                                                                                                                                                                                                                                                                                                                                                                                                                                                                                                                                                                                                | KIMBERLEY LABORATORY                                                                                                                                                                                                                         | National Institute for Communicable Diseases of the National Health Laboratory Service                                                                                                                                                                                                                               | Amoako DG; Bhiman JN; Everatt J; Ismail A; Mahlangu B; Mnguni A; Mohale T; Ntuli N; Scheepers C                                                                                                                                                                                                                                                                                                                                                                                                                                                                                                                                                                                                                                                                                                                                                                                                                              |
| EPI_ISL_436684,<br>EPI_ISL_455631<br>EPI_ISL_2384202,<br>EPI_ISL_2690054<br>EPI_ISL_1048849,<br>EPI_ISL_2424511,<br>EPI_ISL_2425042,<br>EPI_ISL_2425316,<br>EPI_ISL_2833359<br>EPI_ISL_1446361                                                                                                                                                                                                                                                                                                                                                                                                                                                                                                                                                                                                                                                                                                                                                                                                                                                                                                                                                                                                                                                                                                                                                                                                                                                                                                                                                                                                                                                                                                                                                                                                                                                                                                                                                                                                                                                                                                                                                                                                                                                                                                                                                                                                                                                                                                                                                                                                     | KRISP, KZN Research Innovation and Sequencing Platform<br>KS Health and Environmental Laboratories<br>KU Leuven, Rega Institute, Clinical and Epidemiological Virology<br>KY State Public Health Lab                                         | KRISP, KZN Research Innovation and Sequencing Platform<br>Centers for Disease Control and Prevention Division of Viral Diseases, Pathogen Discovery<br>KU Leuven, Rega Institute, Clinical and Epidemiological Virology<br>Centers for Disease Control and Prevention Division of Viral Diseases, Pathogen Discovery | Chimukangara B; Deforche J; Giandhari J; Lessells R; Pillay S; Tegally H; Wilkinson E; de Oliveira T<br>Alison Laifer Halpin; Ben L. Rambo-Martin; Clinton R. Paden; Dakota Howard; Darlene Wagner; Dave Wentworth; Dwani Batra; Jasmine Padilla; Justin Lee; Katie Dillon; Krista Queen; Kristen Knipe; Kristine Lacey; Mark Burroughs; Matthew Scherer; Mili Sheth; Peter Cook; Sam Shepard; Sarah Nobles; Shoshona Le; Suxiang Tong; Vivien Dugan; Yvette Unarumhi<br>Bert Vanmechelen; Joan Marti-Carreras; Piet Maes; Tony Wawina-Bokalanga<br>Alison Laifer Halpin; Ben L. Rambo-Martin; Clinton R. Paden; Dakota Howard; Darlene Wagner; Dave Wentworth; Dwani Batra; Jasmine Padilla; Justin Lee; Katie Dillon; Krista Queen; Kristen Knipe; Kristine Lacey; Mark Burroughs; Matthew Scherer; Mili Sheth; Peter Cook; Sam Shepard; Sarah Nobles; Shoshona Le; Suxiang Tong; Vivien Dugan; Yvette Unarumhi            |
| EPI_ISL_495421                                                                                                                                                                                                                                                                                                                                                                                                                                                                                                                                                                                                                                                                                                                                                                                                                                                                                                                                                                                                                                                                                                                                                                                                                                                                                                                                                                                                                                                                                                                                                                                                                                                                                                                                                                                                                                                                                                                                                                                                                                                                                                                                                                                                                                                                                                                                                                                                                                                                                                                                                                                     | Kafkas University, Faculty of Medicine, Department of Medical Microbiology                                                                                                                                                                   | Kafkas University, Faculty of Medicine, Department of Medical Microbiology                                                                                                                                                                                                                                           | Didem Ozgur; E. Ediz Tutuncu; Murat Karameas                                                                                                                                                                                                                                                                                                                                                                                                                                                                                                                                                                                                                                                                                                                                                                                                                                                                                 |
| EPI_ISL_1412522, EPI_ISL_2153683, EPI_ISL_2627909, EPI_ISL_2688192, EPI_ISL_2833876, EPI_ISL_2842088, EPI_ISL_3030691<br>see above                                                                                                                                                                                                                                                                                                                                                                                                                                                                                                                                                                                                                                                                                                                                                                                                                                                                                                                                                                                                                                                                                                                                                                                                                                                                                                                                                                                                                                                                                                                                                                                                                                                                                                                                                                                                                                                                                                                                                                                                                                                                                                                                                                                                                                                                                                                                                                                                                                                                 | Kansas Health and Environmental Lab<br>Karasai Central District Hospital                                                                                                                                                                     | Kansas Health and Environmental Lab<br>Reference laboratory for the control of viral infections                                                                                                                                                                                                                      | Ben Olsen; Jonathan Barnell; Katherine Wiggins; Mike Grose; and Phil Adam<br>Aidar Ussebayev; Aknur Mutaliyeva; Andrey Komissarov; Artem Fadeev; Azamat Kenessov; Bekzhan Maikotov; Gaukhar Nussupbayeva; Madina Tleubergenova; Maria Pisareva; Nazym Tleumbetova                                                                                                                                                                                                                                                                                                                                                                                                                                                                                                                                                                                                                                                            |
| EPI_ISL_2365354,<br>EPI_ISL_2365857,<br>EPI_ISL_2835993                                                                                                                                                                                                                                                                                                                                                                                                                                                                                                                                                                                                                                                                                                                                                                                                                                                                                                                                                                                                                                                                                                                                                                                                                                                                                                                                                                                                                                                                                                                                                                                                                                                                                                                                                                                                                                                                                                                                                                                                                                                                                                                                                                                                                                                                                                                                                                                                                                                                                                                                            | Kariminejad-Najmabadi Pathology & Genetics Center, Tehran, Iran                                                                                                                                                                              | Genetics Research Center, University of Social Welfare and Rehabilitation Sciences                                                                                                                                                                                                                                   | Hossein Najmabadi.; Kimia Kahrizi; Mahdieh Koskhi; Maryam Azad; Marzieh Mohseni; Siavash Ghaderi; Zohreh Fattahi                                                                                                                                                                                                                                                                                                                                                                                                                                                                                                                                                                                                                                                                                                                                                                                                             |

|                                                                                                                                                                                                                                                                                                                                                    |                                                                                      |                                                                                                                                |                                                                                                                                                                                                                                                                                                                                                                                                                                                                                                                                                                                                                                                                                                                                                                                                                                                                                                                                                                                  |
|----------------------------------------------------------------------------------------------------------------------------------------------------------------------------------------------------------------------------------------------------------------------------------------------------------------------------------------------------|--------------------------------------------------------------------------------------|--------------------------------------------------------------------------------------------------------------------------------|----------------------------------------------------------------------------------------------------------------------------------------------------------------------------------------------------------------------------------------------------------------------------------------------------------------------------------------------------------------------------------------------------------------------------------------------------------------------------------------------------------------------------------------------------------------------------------------------------------------------------------------------------------------------------------------------------------------------------------------------------------------------------------------------------------------------------------------------------------------------------------------------------------------------------------------------------------------------------------|
| EPI_ISL_475544, EPI_ISL_510835                                                                                                                                                                                                                                                                                                                     | Karolinska Universitetslaboratoriet                                                  | The Public Health Agency of Sweden                                                                                             | Anna Risberg; Anna-Malin Linde; Karin Tegmark-Wisell; Maria Lind Karlberg; Mattias Haukland; Mia Brytting; Olov Svartstrom; Oskar Karlsson Lindsjö; Petra Edquist; Reza Advani; Sandra Brodsson; Shaman Muradrasoli                                                                                                                                                                                                                                                                                                                                                                                                                                                                                                                                                                                                                                                                                                                                                              |
| EPI_ISL_2648222, EPI_ISL_2648231, EPI_ISL_2648235, EPI_ISL_2648238, EPI_ISL_2820291, EPI_ISL_2820294, EPI_ISL_2820302, EPI_ISL_2820303, EPI_ISL_2820309, EPI_ISL_2820310, EPI_ISL_2820316, EPI_ISL_2820322, EPI_ISL_2820329, EPI_ISL_2820330, EPI_ISL_2820381, EPI_ISL_2820385, EPI_ISL_2820396, EPI_ISL_2820402, EPI_ISL_2820411, EPI_ISL_2820412 | see above                                                                            | Kasane Primary Hospital Laboratory                                                                                             | Botswana Harvard HIV Reference Laboratory                                                                                                                                                                                                                                                                                                                                                                                                                                                                                                                                                                                                                                                                                                                                                                                                                                                                                                                                        |
| EPI_ISL_754063                                                                                                                                                                                                                                                                                                                                     | Kathmandu University                                                                 | Nepal Health Research Council                                                                                                  | Meghnath Dhimal; Pradip Gyanwali                                                                                                                                                                                                                                                                                                                                                                                                                                                                                                                                                                                                                                                                                                                                                                                                                                                                                                                                                 |
| EPI_ISL_1859725                                                                                                                                                                                                                                                                                                                                    | Kazan Federal University, Academic Consortium                                        | FEDERAL RESEARCH AND CLINICAL CENTER OF PHYSICAL-CHEMICAL MEDICINE OF FEDERAL MEDICAL BIOLOGICAL AGENCY, Academic Consortium   | Alexander Manolov; Alexander Pavlenko; Alexander Rummyantsev; Alexander Samolov; Alexander Troitsky; Alexander Tulichev; Alexander Vasiliev; Alexey Volnukhin; Alla Petrova; Andrey Koritsky; Anna Blagodarova; Anna Varizhuk; Daria Boldyreva; Daria Kharlampieva; Daria Matyushkina; Dmitry Fedorov; Dmitry Pushkar; Ekaterina Moskalova; Elena Galova; Elena Ilina; Elizaveta Orlova; Galina Trifonova; Gaukhar Yusubalieva; Ilshat Gafurov; Irina Shirokova; Konstantin Ivanov; Konstantin Kolontarev; Ksenia Klimina; Larisa Balykova; Lyubov Rychkova; Nadezhda Kolysheva; Natalia Pozhenko; Oleg Ogarkov; Pavel Bashkirov; Polina Khromova; Polina Tikhonova; Ramiz Bakhtiev; Raushaniya Gaifullina; Sergey Rummyantsev; Svetlana Solovieva; Vadim Govorun; Valentin Manuvera; Varvara Musarova; Vasily Lazarev; Vladimir Bakhtaushev; Vladimir Rummyantsev; Vladimir Vesevlovsky; Vladislav Babenko; Vyacheslav Kuroptkin; Vyacheslav Sinkov; Yulia Galeeva; Yuri Udalov |
| EPI_ISL_1184116                                                                                                                                                                                                                                                                                                                                    | Kentucky State Public Health Lab                                                     | Kentucky State Public Health Lab                                                                                               | Joshua Tobias; Karim George; Matthew Johnson; Rachel Zinner; Rhonda Lucas; Stephanie Lunn; Vaneet Arora; William Grooms                                                                                                                                                                                                                                                                                                                                                                                                                                                                                                                                                                                                                                                                                                                                                                                                                                                          |
| EPI_ISL_1239232, EPI_ISL_1239238, EPI_ISL_1239247                                                                                                                                                                                                                                                                                                  | Kimberley Hospital, National Health Laboratory Services, Northern Cape, South Africa | National Institute for Communicable Diseases of the National Health Laboratory Service                                         | Amoako DG; Bhiman JN; Ismail A; Mahlangu B; Mohale T; Ntuli N; Scheepers C                                                                                                                                                                                                                                                                                                                                                                                                                                                                                                                                                                                                                                                                                                                                                                                                                                                                                                       |
| EPI_ISL_3031398                                                                                                                                                                                                                                                                                                                                    | King'ong'o Dispensary                                                                | USAMRD-A, Basic Science Laboratory                                                                                             | Alan Lemtudo; Beth Mutai; Brian Andika; Carol Kifude; Clement Masakwe; Eric Muthanje; Esther Omuseni; Faith Sigei; Gathii Kimita; George Awinda; John Waitumbi; Josphat Nyataya; Rachel Githii; Rehema Liyai; Stephen Ochola                                                                                                                                                                                                                                                                                                                                                                                                                                                                                                                                                                                                                                                                                                                                                     |
| EPI_ISL_483550, EPI_ISL_483551                                                                                                                                                                                                                                                                                                                     | Kingdom of Bahrain Ministry of Health                                                | Erasmus Medical Center                                                                                                         | Amjad Ghanem Mohamed; Anne van der Linden; Bas Oude Munnink; Claudia Schapendonk; David Nieuwenhuijse; Ebrahim Shehad; Fatema; Hashmeiya Al Wasti; Irina Chestakova; Marion Koopmans; Mark Pronk; Pascal Lexmond; Reina Sikkema; Richard Molenkamp; Stefan van Nieuwkoop; Theo Bestebroer; on behalf of the Dutch national COVID-19 response team.                                                                                                                                                                                                                                                                                                                                                                                                                                                                                                                                                                                                                               |
| EPI_ISL_1510532                                                                                                                                                                                                                                                                                                                                    | Klaipeda University Hospital                                                         | Vilnius University Hospital Santaros Klinikos, Center of Laboratory Medicine                                                   | Daniel Naumovas; Dovile Ezerškyte; Gytis Dudas; Ingrida Olendraitė; Laimonas Griskevicius; Ligita Raugaitė; Mindaugas Stoskus; Monika Katenaite; Rimvydas Norvilas                                                                                                                                                                                                                                                                                                                                                                                                                                                                                                                                                                                                                                                                                                                                                                                                               |
| EPI_ISL_2693464                                                                                                                                                                                                                                                                                                                                    | Klinika za infektivne bolesti "Dr. Fran Mihajević"                                   | Hrvatski zavod za javno zdravstvo                                                                                              | Irena Tabain; Ivana Ferenčak                                                                                                                                                                                                                                                                                                                                                                                                                                                                                                                                                                                                                                                                                                                                                                                                                                                                                                                                                     |
| EPI_ISL_654892                                                                                                                                                                                                                                                                                                                                     | Klinisk mikrobiologi                                                                 | The Public Health Agency of Sweden                                                                                             | Anna Risberg; Anna-Malin Linde; Karin Tegmark-Wisell; Maria Lind Karlberg; Mattias Haukland; Mia Brytting; Olov Svartstrom; Oskar Karlsson Lindsjö; Petra Edquist; Reza Advani; Sandra Brodsson                                                                                                                                                                                                                                                                                                                                                                                                                                                                                                                                                                                                                                                                                                                                                                                  |
| EPI_ISL_548962                                                                                                                                                                                                                                                                                                                                     | Klinisk mikrobiologi, Region Västerbotten                                            | Unit for Biological Agents, Department for CBRN Defence and Security, Swedish Defence Research Agency                          | FOI Bioinformatics team                                                                                                                                                                                                                                                                                                                                                                                                                                                                                                                                                                                                                                                                                                                                                                                                                                                                                                                                                          |
| EPI_ISL_419296                                                                                                                                                                                                                                                                                                                                     | Kochi Prefectural Institute of Public Health                                         | Pathogen Genomics Center, National Institute of Infectious Diseases                                                            | Akihiko Tokaji; Hajime Kamiya; Kentaro Itokawa; Makoto Kuroda; Masanori Hashino; Motoi Suzuki; Rina Tanaka; Tsuyoshi Sekizuka                                                                                                                                                                                                                                                                                                                                                                                                                                                                                                                                                                                                                                                                                                                                                                                                                                                    |
| EPI_ISL_2815331                                                                                                                                                                                                                                                                                                                                    | Kuala Lumpur General Hospital                                                        | Institute for Medical Research, Infectious Disease Research Centre, National Institutes of Health, Ministry of Health Malaysia | Azizan MA; Kamel K; Mohd Zawawi Z; Ramly N; Robert F; Suppiah J; Thayan R                                                                                                                                                                                                                                                                                                                                                                                                                                                                                                                                                                                                                                                                                                                                                                                                                                                                                                        |
| EPI_ISL_2649991                                                                                                                                                                                                                                                                                                                                    | Kudat Hospital                                                                       | Institute for Medical Research, Infectious Disease Research Centre, National Institutes of Health, Ministry of Health Malaysia | Azizan MA; Kamel K; Mohd Zawawi Z; Ramly N; Robert F; Suppiah J; Thayan R                                                                                                                                                                                                                                                                                                                                                                                                                                                                                                                                                                                                                                                                                                                                                                                                                                                                                                        |
| EPI_ISL_2689954, EPI_ISL_2689960                                                                                                                                                                                                                                                                                                                   | LA Office of Public Health Laboratories                                              | Centers for Disease Control and Prevention Division of Viral Diseases, Pathogen Discovery                                      | Alison Laufer Halpin; Ben L. Rambo-Martin; Clinton R. Paden; Dakota Howard; Darlene Wagner; Dave Wentworth; Dhvani Batra; Jasmine Padilla; Justin Lee; Katie Dillon; Krista Queen; Kristen Knipe; Kristine Lacke; Mark Burroughs; Matthew Scherer; Mili Sheth; Peter Cook; Sam Shepard; Sarah Nobles; Shoshona Le; Suxiang Tong; Vivien Dugan; Yvette Unourumi                                                                                                                                                                                                                                                                                                                                                                                                                                                                                                                                                                                                                   |
| EPI_ISL_2779525                                                                                                                                                                                                                                                                                                                                    | LAB-BMC                                                                              | USAMRD-A, Basic Science Laboratory                                                                                             | Alan Lemtudo; Beth Mutai; Brian Andika; Carol Kifude; Clement Masakwe; Eric Muthanje; Esther Omuseni; Faith Sigei; Gathii Kimita; George Awinda; John Waitumbi; Josphat Nyataya; Rachel Githii; Rehema Liyai; Stephen Ochola                                                                                                                                                                                                                                                                                                                                                                                                                                                                                                                                                                                                                                                                                                                                                     |
| EPI_ISL_2893835                                                                                                                                                                                                                                                                                                                                    | LABORATOIRE FORTE BIO ST PAUL LES DAX                                                | CNR Virus des Infections Respiratoires - France SUD                                                                            | Antonin Bai; Bruno Lina; Gregory Destras; Gwendolynne Burfin; Hadrien Regue; Laurence Josset; Martine Valette; Quentin Semanas                                                                                                                                                                                                                                                                                                                                                                                                                                                                                                                                                                                                                                                                                                                                                                                                                                                   |
| EPI_ISL_2278210                                                                                                                                                                                                                                                                                                                                    | LABORATOIRE GCS INTER HOSPITALIER                                                    | CHU Purpan - Laboratoire de Virologie - Institut Fédératif de Biologie                                                         | Bulach T.; Donnadieu C.; Izopet J.; Latour J.; Milhes M.; Nicot F.; Ranger N.; Salin G.; Tremeaux P.                                                                                                                                                                                                                                                                                                                                                                                                                                                                                                                                                                                                                                                                                                                                                                                                                                                                             |
| EPI_ISL_2676632                                                                                                                                                                                                                                                                                                                                    | LABORATOIRE d'ANALYSES de BIOLOGIE MEDICALES                                         | CNR Virus des Infections Respiratoires - France SUD                                                                            | Antonin Bai; Bruno Lina; Gregory Destras; Gwendolynne Burfin; Hadrien Regue; Laurence Josset; Martine Valette; Quentin Semanas                                                                                                                                                                                                                                                                                                                                                                                                                                                                                                                                                                                                                                                                                                                                                                                                                                                   |
| EPI_ISL_2657871                                                                                                                                                                                                                                                                                                                                    | LABORATORIO CLINICA IMBANACO                                                         | Instituto Nacional de Salud- Dirección de Investigación en Salud Pública                                                       | Carlos Franco-Muñoz; Carmen Osorio; Diana Malo; Diego A. Álvarez-Díaz; Diego Andrés Prada; Gerardo Santamaría; Hector Alejandro Ruiz-Moreno; Jhonnatan Reales-González; Jorge Rivera; Juan Camilo Martínez; Julian Naizaque; Katherine Laiton-Donato; Lisseth Pardo; Magdalena Wiesner; Marcela Mercado-Reyes; María T. Herrera-Sepúlveda; Marta Lopez Blanco; Martha Lucia Ospina Martínez; Paola Rojas; Sergio Gomez; Sheryll Corchuelo; Ángela Alarcon Cruz                                                                                                                                                                                                                                                                                                                                                                                                                                                                                                                   |
| EPI_ISL_2834727                                                                                                                                                                                                                                                                                                                                    | LABORATORIO CLINICO HIGUERA ESCALANTE                                                | Instituto Nacional de Salud- Dirección de Investigación en Salud Pública                                                       | Carlos Franco-Muñoz; Carmen Osorio; Diana Malo; Diego A. Álvarez-Díaz; Diego Andrés Prada; Gerardo Santamaría; Hector Alejandro Ruiz-Moreno; Jhonnatan Reales-González; Jorge Rivera; Juan Camilo Martínez; Julian Naizaque; Katherine Laiton-Donato; Lisseth Pardo; Magdalena Wiesner; Marcela Mercado-Reyes; María T. Herrera-Sepúlveda; Marta Lopez Blanco; Martha Lucia Ospina Martínez; Paola Rojas; Sergio Gomez; Sheryll Corchuelo; Ángela Alarcon Cruz                                                                                                                                                                                                                                                                                                                                                                                                                                                                                                                   |
| EPI_ISL_682275                                                                                                                                                                                                                                                                                                                                     | LABORATORIOS LABIN                                                                   | Incienza, Instituto Costarricense de Investigación y Enseñanza en Nutrición y Salud                                            | Adriana Godínez; Claudio Soto-Garita; Estela Cordero; Francisco Duarte; Hebleen Porras; Melany Calderon & Pei Ling Chan                                                                                                                                                                                                                                                                                                                                                                                                                                                                                                                                                                                                                                                                                                                                                                                                                                                          |
| EPI_ISL_2893755                                                                                                                                                                                                                                                                                                                                    | LABOSUD                                                                              | GenBio                                                                                                                         | Gwladys SEVRIN                                                                                                                                                                                                                                                                                                                                                                                                                                                                                                                                                                                                                                                                                                                                                                                                                                                                                                                                                                   |
| EPI_ISL_717909                                                                                                                                                                                                                                                                                                                                     | LACEN RJ - Noel Nutels                                                               | Bioinformatics Laboratory / LNCC                                                                                               | Alexandra L Gerber; Amilcar Tanuri; Ana Paula de C Guimarães; Ana Tereza R de Vasconcelos; Andréa Cony Cavalcanti; Carolina M Voloch; Claudia dos Santos Rodrigues; Cynthia C Cardoso; Diana Mariani; Luiz G P de Almeida; Otavio Bustrolini; Ronaldo da Silva F Jr; Terezinha M P P Castiñeira                                                                                                                                                                                                                                                                                                                                                                                                                                                                                                                                                                                                                                                                                  |
| EPI_ISL_2821315, EPI_ISL_2821319, EPI_ISL_3046170, EPI_ISL_3046275, EPI_ISL_3046313, EPI_ISL_3046320, EPI_ISL_3046326, EPI_ISL_3046345, EPI_ISL_3046346                                                                                                                                                                                            | see above                                                                            | LACEN/PE                                                                                                                       | WallauLab on behalf of Fiocruz COVID-19 Genomic Surveillance Network                                                                                                                                                                                                                                                                                                                                                                                                                                                                                                                                                                                                                                                                                                                                                                                                                                                                                                             |
| EPI_ISL_2463301, EPI_ISL_2463303                                                                                                                                                                                                                                                                                                                   | LANCET LABORATORY                                                                    | National Institute for Communicable Diseases of the National Health Laboratory Service                                         | Alexandre Freitas da Silva; Antonio Mauro Rezende; Cassia Docena; Constância Flávia Junqueira Ayres; Cássia Docena; Duschnika Ribeiro Duarte Guedes; Elisama Helvecio; Filipe Zimmer Dezord; Gabriel Luz Wallau; Gustavo Barbosa de Lima; Lais Ceschini Machado; Larissa Krokovsky; Lais Ceschini Machado; Lilián Carolyn Amorim Silva; Marcelo Henrique dos Santos Paiva; Matheus Filgueira Bezerra; Sinalv Pinto Brandão Filho                                                                                                                                                                                                                                                                                                                                                                                                                                                                                                                                                 |
| EPI_ISL_2433867, EPI_ISL_2433906                                                                                                                                                                                                                                                                                                                   | LANCET, LABORATORIES                                                                 | National Institute for Communicable Diseases of the National Health Laboratory Service                                         | Amoako DG; Bhiman JN; Everatt J; Glass A; Sisonke Team; Viana R                                                                                                                                                                                                                                                                                                                                                                                                                                                                                                                                                                                                                                                                                                                                                                                                                                                                                                                  |
| EPI_ISL_1935347                                                                                                                                                                                                                                                                                                                                    | LBM CLUSES                                                                           | CNR Virus des Infections Respiratoires - France SUD                                                                            | Antonin Bai; Bruno Lina; Bruno Simon; Gregory Destras; Gwendolynne Burfin; Hadrien Regue; Laurence Josset; Martine Valette; Quentin Semanas                                                                                                                                                                                                                                                                                                                                                                                                                                                                                                                                                                                                                                                                                                                                                                                                                                      |
| EPI_ISL_1788463                                                                                                                                                                                                                                                                                                                                    | LBM DE LA SAUVEGARDE                                                                 | CNR Virus des Infections Respiratoires - France SUD                                                                            | Antonin Bai; Bruno Lina; Bruno Simon; Gregory Destras; Gwendolynne Burfin; Hadrien Regue; Laurence Josset; Martine Valette; Quentin Semanas                                                                                                                                                                                                                                                                                                                                                                                                                                                                                                                                                                                                                                                                                                                                                                                                                                      |
| EPI_ISL_2827783, EPI_ISL_2827787                                                                                                                                                                                                                                                                                                                   | LDSP - CAQUETA HOSPITAL MALVINAS                                                     | Instituto Nacional de Salud- Dirección de Investigación en Salud Pública                                                       | Carlos Franco-Muñoz; Carmen Osorio; Diana Malo; Diego A. Álvarez-Díaz; Diego Andrés Prada; Gerardo Santamaría; Hector Alejandro Ruiz-Moreno; Jhonnatan Reales-González; Jorge Rivera; Juan Camilo Martínez; Julian Naizaque; Katherine Laiton-Donato; Lisseth Pardo; Magdalena Wiesner; Marcela Mercado-Reyes; María T. Herrera-Sepúlveda; Marta Lopez Blanco; Martha Lucia Ospina Martínez; Paola Rojas; Sergio Gomez; Sheryll Corchuelo; Ángela Alarcon Cruz                                                                                                                                                                                                                                                                                                                                                                                                                                                                                                                   |
| EPI_ISL_2674311                                                                                                                                                                                                                                                                                                                                    | LDSP NARIÑO                                                                          | Instituto Nacional de Salud- Dirección de Investigación en Salud Pública                                                       | Carlos Franco-Muñoz; Carmen Osorio; Diana Malo; Diego A. Álvarez-Díaz; Diego Andrés Prada; Gerardo Santamaría; Hector Alejandro Ruiz-Moreno; Jhonnatan Reales-González; Jorge Rivera; Juan Camilo Martínez; Julian Naizaque; Katherine Laiton-Donato; Lisseth Pardo; Magdalena Wiesner; Marcela Mercado-Reyes; María T. Herrera-Sepúlveda; Marta Lopez Blanco; Martha Lucia Ospina Martínez; Paola Rojas; Sergio Gomez; Sheryll Corchuelo; Ángela Alarcon Cruz                                                                                                                                                                                                                                                                                                                                                                                                                                                                                                                   |
| EPI_ISL_2894632                                                                                                                                                                                                                                                                                                                                    | LDSP QUINDIO                                                                         | Instituto Nacional de Salud- Dirección de Investigación en Salud Pública                                                       | Carlos Franco-Muñoz; Carmen Osorio; Diana Malo; Diego A. Álvarez-Díaz; Diego Andrés Prada; Gerardo Santamaría; Hector Alejandro Ruiz-Moreno; Jhonnatan Reales-González; Jorge Rivera; Juan Camilo Martínez; Julian Naizaque; Katherine Laiton-Donato; Lisseth Pardo; Magdalena Wiesner; Marcela Mercado-Reyes; María T. Herrera-Sepúlveda; Marta Lopez Blanco; Martha Lucia Ospina Martínez; Paola Rojas; Sergio Gomez; Sheryll Corchuelo; Ángela Alarcon Cruz                                                                                                                                                                                                                                                                                                                                                                                                                                                                                                                   |
| EPI_ISL_3007486                                                                                                                                                                                                                                                                                                                                    | LDSP VILLAVICENCIO - CLINICA PRIMAVERA DE VILLAVICENCIO                              | Instituto Nacional de Salud- Dirección de Investigación en Salud Pública                                                       | Carlos Franco-Muñoz; Carmen Osorio; Diana Malo; Diego A. Álvarez-Díaz; Diego Andrés Prada; Gerardo Santamaría; Hector Alejandro Ruiz-Moreno; Jhonnatan Reales-González; Jorge Rivera; Juan Camilo Martínez; Julian Naizaque; Katherine Laiton-Donato; Lisseth Pardo; Magdalena Wiesner; Marcela Mercado-Reyes; María T. Herrera-Sepúlveda; Marta Lopez Blanco; Martha Lucia Ospina Martínez; Paola Rojas; Sergio Gomez; Sheryll Corchuelo; Ángela Alarcon Cruz                                                                                                                                                                                                                                                                                                                                                                                                                                                                                                                   |
| EPI_ISL_3024517, EPI_ISL_3024525                                                                                                                                                                                                                                                                                                                   | LEBOWAKGOMO LABORATORY                                                               | National Institute for Communicable Diseases of the National Health Laboratory Service                                         | Amoako DG; Bhiman JN; Everatt J; Ismail A; Mahlangu B; Mnguni A; Mohale T; Ntuli N; Scheepers C                                                                                                                                                                                                                                                                                                                                                                                                                                                                                                                                                                                                                                                                                                                                                                                                                                                                                  |
| EPI_ISL_2495924, EPI_ISL_2937905                                                                                                                                                                                                                                                                                                                   | LESP Aguascalientes                                                                  | Instituto de Diagnostico y Referencia Epidemiologicos (INDRE)                                                                  | Abril Rodríguez-Maldonado; Ariadna Medina-Benitez; Claudia Wong-Arambula; Ernesto Ramirez-Gonzalez.; Gisela Barrera-Badillo; Irma Lopez-Martinez; Joaquin Quiroz-Mercado; Lucia Hernandez-Rivas; Maribel Gonzalez-Villa; Natividad Cruz-Ortiz; Sergio Rangel-Guerrero; Tatiana Nunez-Garcia; Vanessa Rivero-Arredondo                                                                                                                                                                                                                                                                                                                                                                                                                                                                                                                                                                                                                                                            |
| EPI_ISL_2296064, EPI_ISL_3033354                                                                                                                                                                                                                                                                                                                   | LESP Baja California                                                                 | Instituto de Diagnostico y Referencia Epidemiologicos (INDRE)                                                                  | Abril Rodríguez-Maldonado; Ariadna Medina-Benitez; Claudia Wong-Arambula; Ernesto Ramirez-Gonzalez.; Gisela Barrera-Badillo; Irma Lopez-Martinez; Joaquin Quiroz-Mercado; Lucia Hernandez-Rivas; Maribel Gonzalez-Villa; Natividad Cruz-Ortiz; Sergio Rangel-Guerrero; Tatiana Nunez-Garcia; Vanessa Rivero-Arredondo                                                                                                                                                                                                                                                                                                                                                                                                                                                                                                                                                                                                                                                            |
| EPI_ISL_1651893, EPI_ISL_1821182, EPI_ISL_2533818                                                                                                                                                                                                                                                                                                  | LESP Baja California Sur                                                             | Instituto de Diagnostico y Referencia Epidemiologicos (INDRE)                                                                  | Abril Rodríguez-Maldonado; Ariadna Medina-Benitez; Claudia Wong-Arambula; Ernesto Ramirez-Gonzalez.; Gisela Barrera-Badillo; Irma Lopez-Martinez; Joaquin Quiroz-Mercado; Lucia Hernandez-Rivas; Natividad Cruz-Ortiz; Sergio Rangel-Guerrero; Tatiana Nunez-Garcia; Vanessa Rivero-Arredondo                                                                                                                                                                                                                                                                                                                                                                                                                                                                                                                                                                                                                                                                                    |
| EPI_ISL_2094509, EPI_ISL_2094511, EPI_ISL_2533816, EPI_ISL_2559361                                                                                                                                                                                                                                                                                 | LESP Campeche                                                                        | Instituto de Diagnostico y Referencia Epidemiologicos (INDRE)                                                                  | Abril Rodríguez-Maldonado; Ariadna Medina-Benitez; Claudia Wong-Arambula; Ernesto Ramirez-Gonzalez.; Gisela Barrera-Badillo; Irma Lopez-Martinez; Joaquin Quiroz-Mercado; Lucia Hernandez-Rivas; Natividad Cruz-Ortiz; Sergio Rangel-Guerrero; Tatiana Nunez-Garcia; Vanessa Rivero-Arredondo                                                                                                                                                                                                                                                                                                                                                                                                                                                                                                                                                                                                                                                                                    |
| EPI_ISL_2492494                                                                                                                                                                                                                                                                                                                                    | LESP Chiapas                                                                         | Instituto de Diagnostico y Referencia Epidemiologicos (INDRE)                                                                  | Abril Rodríguez-Maldonado; Ariadna Medina-Benitez; Claudia Wong-Arambula; Ernesto Ramirez-Gonzalez.; Gisela Barrera-Badillo; Irma Lopez-Martinez; Joaquin Quiroz-Mercado; Lucia Hernandez-Rivas; Natividad Cruz-Ortiz; Sergio Rangel-Guerrero; Tatiana Nunez-Garcia; Vanessa Rivero-Arredondo                                                                                                                                                                                                                                                                                                                                                                                                                                                                                                                                                                                                                                                                                    |
| EPI_ISL_2858979                                                                                                                                                                                                                                                                                                                                    | LESP Chihuahua                                                                       | Instituto de Diagnostico y Referencia Epidemiologicos (INDRE)                                                                  | Abril Rodríguez-Maldonado; Ariadna Medina-Benitez; Claudia Wong-Arambula; Ernesto Ramirez-Gonzalez.; Gisela Barrera-Badillo; Irma Lopez-Martinez; Joaquin Quiroz-Mercado; Lucia Hernandez-Rivas; Maribel Gonzalez-Villa; Natividad Cruz-Ortiz; Sergio Rangel-Guerrero; Tatiana Nunez-Garcia; Vanessa Rivero-Arredondo                                                                                                                                                                                                                                                                                                                                                                                                                                                                                                                                                                                                                                                            |
| EPI_ISL_1651889, EPI_ISL_2674689, EPI_ISL_2688985                                                                                                                                                                                                                                                                                                  | LESP Coahuila                                                                        | Instituto de Diagnostico y Referencia Epidemiologicos (INDRE)                                                                  | Abril Rodríguez-Maldonado; Ariadna Medina-Benitez; Claudia Wong-Arambula; Ernesto Ramirez-Gonzalez.; Gisela Barrera-Badillo; Irma Lopez-Martinez; Joaquin Quiroz-Mercado; Lucia Hernandez-Rivas; Natividad Cruz-Ortiz; Sergio Rangel-Guerrero; Tatiana Nunez-Garcia; Vanessa Rivero-Arredondo                                                                                                                                                                                                                                                                                                                                                                                                                                                                                                                                                                                                                                                                                    |
| EPI_ISL_2920686                                                                                                                                                                                                                                                                                                                                    | LESP Colima                                                                          | Instituto de Diagnostico y Referencia Epidemiologicos (INDRE)                                                                  | Abril Rodríguez-Maldonado; Ariadna Medina-Benitez; Claudia Wong-Arambula; Ernesto Ramirez-Gonzalez.; Gisela Barrera-Badillo; Irma Lopez-Martinez; Joaquin Quiroz-Mercado; Lucia Hernandez-Rivas; Natividad Cruz-Ortiz; Sergio Rangel-Guerrero; Tatiana Nunez-Garcia; Vanessa Rivero-Arredondo                                                                                                                                                                                                                                                                                                                                                                                                                                                                                                                                                                                                                                                                                    |
| EPI_ISL_1661512, EPI_ISL_2296101, EPI_ISL_2476421                                                                                                                                                                                                                                                                                                  | LESP Guanajuato                                                                      | Instituto de Diagnostico y Referencia Epidemiologicos (INDRE)                                                                  | Abril Rodríguez-Maldonado; Ariadna Medina-Benitez; Claudia Wong-Arambula; Ernesto Ramirez-Gonzalez.; Gisela Barrera-Badillo; Irma Lopez-Martinez; Joaquin Quiroz-Mercado; Lucia Hernandez-Rivas; Natividad Cruz-Ortiz; Sergio Rangel-Guerrero; Tatiana Nunez-Garcia; Vanessa Rivero-Arredondo                                                                                                                                                                                                                                                                                                                                                                                                                                                                                                                                                                                                                                                                                    |

|                                                                                                                                                                                                                                                                                                                                                                                                                                                                                                                                                                                                                                                                                                                                                |                                                                                                               |                                                                                                                                                                                                                    |                                                                                                                                                                                                                                                                                                                                                                                                                                                                                                                                                                                                          |                                                                                                                                                                                                                                                                                                                                                                                                                                                                                                                                                                                                                                                            |
|------------------------------------------------------------------------------------------------------------------------------------------------------------------------------------------------------------------------------------------------------------------------------------------------------------------------------------------------------------------------------------------------------------------------------------------------------------------------------------------------------------------------------------------------------------------------------------------------------------------------------------------------------------------------------------------------------------------------------------------------|---------------------------------------------------------------------------------------------------------------|--------------------------------------------------------------------------------------------------------------------------------------------------------------------------------------------------------------------|----------------------------------------------------------------------------------------------------------------------------------------------------------------------------------------------------------------------------------------------------------------------------------------------------------------------------------------------------------------------------------------------------------------------------------------------------------------------------------------------------------------------------------------------------------------------------------------------------------|------------------------------------------------------------------------------------------------------------------------------------------------------------------------------------------------------------------------------------------------------------------------------------------------------------------------------------------------------------------------------------------------------------------------------------------------------------------------------------------------------------------------------------------------------------------------------------------------------------------------------------------------------------|
| EPI_ISL_2663360, EPI_ISL_3033348                                                                                                                                                                                                                                                                                                                                                                                                                                                                                                                                                                                                                                                                                                               | LESP Hidalgo                                                                                                  | Instituto de Diagnostico y Referencia Epidemiologicos (INDRE)                                                                                                                                                      | Abril Rodriguez-Maldonado; Ariadna Medina-Benitez; Claudia Wong-Arambula; Ernesto Ramirez-Gonzalez.; Gisela Barrera-Badillo; Irma Lopez-Martinez; Joaquin Quiroz-Mercado; Lucia Hernandez-Rivas; Maribel Gonzalez-Villa; Natividad Cruz-Ortiz; Sergio Rangel-Guerrero; Tatiana Nunez-Garcia; Vanessa Rivero-Arredondo                                                                                                                                                                                                                                                                                    |                                                                                                                                                                                                                                                                                                                                                                                                                                                                                                                                                                                                                                                            |
| EPI_ISL_1821200, EPI_ISL_2094505, EPI_ISL_2533767                                                                                                                                                                                                                                                                                                                                                                                                                                                                                                                                                                                                                                                                                              | LESP Jalisco                                                                                                  | Instituto de Diagnostico y Referencia Epidemiologicos (INDRE)                                                                                                                                                      | Abril Rodriguez-Maldonado; Ariadna Medina-Benitez; Claudia Wong-Arambula; Ernesto Ramirez-Gonzalez.; Gisela Barrera-Badillo; Irma Lopez-Martinez; Joaquin Quiroz-Mercado; Lucia Hernandez-Rivas; Natividad Cruz-Ortiz; Sergio Rangel-Guerrero; Tatiana Nunez-Garcia; Vanessa Rivero-Arredondo                                                                                                                                                                                                                                                                                                            |                                                                                                                                                                                                                                                                                                                                                                                                                                                                                                                                                                                                                                                            |
| EPI_ISL_2246830, EPI_ISL_2340892, EPI_ISL_2340899, EPI_ISL_2340901, EPI_ISL_3033443, EPI_ISL_3033447, EPI_ISL_3046115, EPI_ISL_3046118                                                                                                                                                                                                                                                                                                                                                                                                                                                                                                                                                                                                         | see above                                                                                                     | LESP Michoacan                                                                                                                                                                                                     | Instituto de Diagnostico y Referencia Epidemiologicos (INDRE)                                                                                                                                                                                                                                                                                                                                                                                                                                                                                                                                            | Abril Rodriguez-Maldonado; Ariadna Medina-Benitez; Claudia Wong-Arambula; Ernesto Ramirez-Gonzalez.; Gisela Barrera-Badillo; Irma Lopez-Martinez; Joaquin Quiroz-Mercado; Lucia Hernandez-Rivas; Maribel Gonzalez-Villa; Natividad Cruz-Ortiz; Sergio Rangel-Guerrero; Tatiana Nunez-Garcia; Vanessa Rivero-Arredondo                                                                                                                                                                                                                                                                                                                                      |
| EPI_ISL_1651907, EPI_ISL_1821146, EPI_ISL_1857248, EPI_ISL_2495935                                                                                                                                                                                                                                                                                                                                                                                                                                                                                                                                                                                                                                                                             | LESP Morelos                                                                                                  | Instituto de Diagnostico y Referencia Epidemiologicos (INDRE)                                                                                                                                                      | Abril Rodriguez-Maldonado; Ariadna Medina-Benitez; Claudia Wong-Arambula; Ernesto Ramirez-Gonzalez.; Gisela Barrera-Badillo; Irma Lopez-Martinez; Joaquin Quiroz-Mercado; Lucia Hernandez-Rivas; Natividad Cruz-Ortiz; Sergio Rangel-Guerrero; Tatiana Nunez-Garcia; Vanessa Rivero-Arredondo                                                                                                                                                                                                                                                                                                            |                                                                                                                                                                                                                                                                                                                                                                                                                                                                                                                                                                                                                                                            |
| EPI_ISL_2158204                                                                                                                                                                                                                                                                                                                                                                                                                                                                                                                                                                                                                                                                                                                                | LESP Nayarit                                                                                                  | Instituto de Diagnostico y Referencia Epidemiologicos (INDRE)                                                                                                                                                      | Abril Rodriguez-Maldonado; Ariadna Medina-Benitez; Claudia Wong-Arambula; Ernesto Ramirez-Gonzalez.; Gisela Barrera-Badillo; Irma Lopez-Martinez; Joaquin Quiroz-Mercado; Lucia Hernandez-Rivas; Natividad Cruz-Ortiz; Sergio Rangel-Guerrero; Tatiana Nunez-Garcia; Vanessa Rivero-Arredondo                                                                                                                                                                                                                                                                                                            |                                                                                                                                                                                                                                                                                                                                                                                                                                                                                                                                                                                                                                                            |
| EPI_ISL_1805485, EPI_ISL_2296059                                                                                                                                                                                                                                                                                                                                                                                                                                                                                                                                                                                                                                                                                                               | LESP Oaxaca                                                                                                   | Instituto de Diagnostico y Referencia Epidemiologicos (INDRE)                                                                                                                                                      | Abril Rodriguez-Maldonado; Ariadna Medina-Benitez; Claudia Wong-Arambula; Ernesto Ramirez-Gonzalez.; Gisela Barrera-Badillo; Irma Lopez-Martinez; Joaquin Quiroz-Mercado; Lucia Hernandez-Rivas; Natividad Cruz-Ortiz; Sergio Rangel-Guerrero; Tatiana Nunez-Garcia; Vanessa Rivero-Arredondo                                                                                                                                                                                                                                                                                                            |                                                                                                                                                                                                                                                                                                                                                                                                                                                                                                                                                                                                                                                            |
| EPI_ISL_2455897, EPI_ISL_2455901, EPI_ISL_2495928, EPI_ISL_2495953, EPI_ISL_2559289, EPI_ISL_2559309, EPI_ISL_2689824, EPI_ISL_3046095                                                                                                                                                                                                                                                                                                                                                                                                                                                                                                                                                                                                         | see above                                                                                                     | LESP Queretaro                                                                                                                                                                                                     | Instituto de Diagnostico y Referencia Epidemiologicos (INDRE)                                                                                                                                                                                                                                                                                                                                                                                                                                                                                                                                            | Abril Rodriguez-Maldonado; Ariadna Medina-Benitez; Claudia Wong-Arambula; Ernesto Ramirez-Gonzalez.; Gisela Barrera-Badillo; Irma Lopez-Martinez; Joaquin Quiroz-Mercado; Lucia Hernandez-Rivas; Maribel Gonzalez-Villa; Natividad Cruz-Ortiz; Sergio Rangel-Guerrero; Tatiana Nunez-Garcia; Vanessa Rivero-Arredondo                                                                                                                                                                                                                                                                                                                                      |
| EPI_ISL_2296087, EPI_ISL_2492495                                                                                                                                                                                                                                                                                                                                                                                                                                                                                                                                                                                                                                                                                                               | LESP Quintana Roo                                                                                             | Instituto de Diagnostico y Referencia Epidemiologicos (INDRE)                                                                                                                                                      | Abril Rodriguez-Maldonado; Ariadna Medina-Benitez; Claudia Wong-Arambula; Ernesto Ramirez-Gonzalez.; Gisela Barrera-Badillo; Irma Lopez-Martinez; Joaquin Quiroz-Mercado; Lucia Hernandez-Rivas; Natividad Cruz-Ortiz; Sergio Rangel-Guerrero; Tatiana Nunez-Garcia; Vanessa Rivero-Arredondo                                                                                                                                                                                                                                                                                                            |                                                                                                                                                                                                                                                                                                                                                                                                                                                                                                                                                                                                                                                            |
| EPI_ISL_1821128, EPI_ISL_2663403, EPI_ISL_2689794                                                                                                                                                                                                                                                                                                                                                                                                                                                                                                                                                                                                                                                                                              | LESP Sonora                                                                                                   | Instituto de Diagnostico y Referencia Epidemiologicos (INDRE)                                                                                                                                                      | Abril Rodriguez-Maldonado; Ariadna Medina-Benitez; Claudia Wong-Arambula; Ernesto Ramirez-Gonzalez.; Gisela Barrera-Badillo; Irma Lopez-Martinez; Joaquin Quiroz-Mercado; Lucia Hernandez-Rivas; Natividad Cruz-Ortiz; Sergio Rangel-Guerrero; Tatiana Nunez-Garcia; Vanessa Rivero-Arredondo                                                                                                                                                                                                                                                                                                            |                                                                                                                                                                                                                                                                                                                                                                                                                                                                                                                                                                                                                                                            |
| EPI_ISL_2920762, EPI_ISL_3033552                                                                                                                                                                                                                                                                                                                                                                                                                                                                                                                                                                                                                                                                                                               | LESP Tabasco                                                                                                  | Instituto de Diagnostico y Referencia Epidemiologicos (INDRE)                                                                                                                                                      | Abril Rodriguez-Maldonado; Ariadna Medina-Benitez; Claudia Wong-Arambula; Ernesto Ramirez-Gonzalez.; Gisela Barrera-Badillo; Irma Lopez-Martinez; Joaquin Quiroz-Mercado; Lucia Hernandez-Rivas; Maribel Gonzalez-Villa; Natividad Cruz-Ortiz; Sergio Rangel-Guerrero; Tatiana Nunez-Garcia; Vanessa Rivero-Arredondo                                                                                                                                                                                                                                                                                    |                                                                                                                                                                                                                                                                                                                                                                                                                                                                                                                                                                                                                                                            |
| EPI_ISL_1821158, EPI_ISL_2246840, EPI_ISL_2455939, EPI_ISL_2455950                                                                                                                                                                                                                                                                                                                                                                                                                                                                                                                                                                                                                                                                             | LESP Tamaulipas                                                                                               | Instituto de Diagnostico y Referencia Epidemiologicos (INDRE)                                                                                                                                                      | Abril Rodriguez-Maldonado; Ariadna Medina-Benitez; Claudia Wong-Arambula; Ernesto Ramirez-Gonzalez.; Gisela Barrera-Badillo; Irma Lopez-Martinez; Joaquin Quiroz-Mercado; Lucia Hernandez-Rivas; Natividad Cruz-Ortiz; Sergio Rangel-Guerrero; Tatiana Nunez-Garcia; Vanessa Rivero-Arredondo                                                                                                                                                                                                                                                                                                            |                                                                                                                                                                                                                                                                                                                                                                                                                                                                                                                                                                                                                                                            |
| EPI_ISL_2937845                                                                                                                                                                                                                                                                                                                                                                                                                                                                                                                                                                                                                                                                                                                                | LESP Tlaxcala                                                                                                 | Instituto de Diagnostico y Referencia Epidemiologicos (INDRE)                                                                                                                                                      | Abril Rodriguez-Maldonado; Ariadna Medina-Benitez; Claudia Wong-Arambula; Ernesto Ramirez-Gonzalez.; Gisela Barrera-Badillo; Irma Lopez-Martinez; Joaquin Quiroz-Mercado; Lucia Hernandez-Rivas; Maribel Gonzalez-Villa; Natividad Cruz-Ortiz; Sergio Rangel-Guerrero; Tatiana Nunez-Garcia; Vanessa Rivero-Arredondo                                                                                                                                                                                                                                                                                    |                                                                                                                                                                                                                                                                                                                                                                                                                                                                                                                                                                                                                                                            |
| EPI_ISL_1821163, EPI_ISL_2559279                                                                                                                                                                                                                                                                                                                                                                                                                                                                                                                                                                                                                                                                                                               | LESP Veracruz                                                                                                 | Instituto de Diagnostico y Referencia Epidemiologicos (INDRE)                                                                                                                                                      | Abril Rodriguez-Maldonado; Ariadna Medina-Benitez; Claudia Wong-Arambula; Ernesto Ramirez-Gonzalez.; Gisela Barrera-Badillo; Irma Lopez-Martinez; Joaquin Quiroz-Mercado; Lucia Hernandez-Rivas; Natividad Cruz-Ortiz; Sergio Rangel-Guerrero; Tatiana Nunez-Garcia; Vanessa Rivero-Arredondo                                                                                                                                                                                                                                                                                                            |                                                                                                                                                                                                                                                                                                                                                                                                                                                                                                                                                                                                                                                            |
| EPI_ISL_2533779, EPI_ISL_2545762, EPI_ISL_3033498                                                                                                                                                                                                                                                                                                                                                                                                                                                                                                                                                                                                                                                                                              | LESP Yucatan                                                                                                  | Instituto de Diagnostico y Referencia Epidemiologicos (INDRE)                                                                                                                                                      | Abril Rodriguez-Maldonado; Ariadna Medina-Benitez; Claudia Wong-Arambula; Ernesto Ramirez-Gonzalez.; Gisela Barrera-Badillo; Irma Lopez-Martinez; Joaquin Quiroz-Mercado; Lucia Hernandez-Rivas; Maribel Gonzalez-Villa; Natividad Cruz-Ortiz; Sergio Rangel-Guerrero; Tatiana Nunez-Garcia; Vanessa Rivero-Arredondo                                                                                                                                                                                                                                                                                    |                                                                                                                                                                                                                                                                                                                                                                                                                                                                                                                                                                                                                                                            |
| EPI_ISL_1752510                                                                                                                                                                                                                                                                                                                                                                                                                                                                                                                                                                                                                                                                                                                                | LHUB-ULB                                                                                                      | LHUB-ULB                                                                                                                                                                                                           | Charlotte Michel; Marie Hallin; Olivier Vandenberg                                                                                                                                                                                                                                                                                                                                                                                                                                                                                                                                                       |                                                                                                                                                                                                                                                                                                                                                                                                                                                                                                                                                                                                                                                            |
| EPI_ISL_1524979, EPI_ISL_2943031                                                                                                                                                                                                                                                                                                                                                                                                                                                                                                                                                                                                                                                                                                               | LHUB-ULB                                                                                                      | Labo Klinische Biologie, UZA                                                                                                                                                                                       | Basil Britto Xavier; Christine Lammens; Herman Goossens; Ines Verbesselt; Jasmine Coppens; Kathleen Holemans; Marie Le Mercier; Veerle Matheussen                                                                                                                                                                                                                                                                                                                                                                                                                                                        |                                                                                                                                                                                                                                                                                                                                                                                                                                                                                                                                                                                                                                                            |
| EPI_ISL_1312503, EPI_ISL_1613434                                                                                                                                                                                                                                                                                                                                                                                                                                                                                                                                                                                                                                                                                                               | LIC                                                                                                           | Latvian Biomedical Research and Study Centre                                                                                                                                                                       | Daivs Fridmanis; Diana Dusacka; Elina Dimina; Guntars Zarins; Ivars Silamikelis; Janis Klovinis; Janis Pjalkovskis; Jurjjs Perevoscikovs; Kaspars Megnis; Laila Silamikele; Lauma Freimane; Laura Ansons; Liga Birzniece; Monta Ustinova; Nikita Zrelvors; Reinis Zeltmatis; Uga Dumpis; Una Krumina; Vita Rovite                                                                                                                                                                                                                                                                                        |                                                                                                                                                                                                                                                                                                                                                                                                                                                                                                                                                                                                                                                            |
| EPI_ISL_482737, EPI_ISL_482740                                                                                                                                                                                                                                                                                                                                                                                                                                                                                                                                                                                                                                                                                                                 | LNR National Reference Laboratory, Mohammed VI University of Health Sciences                                  | Medical Biotechnology Laboratory, Rabat Medical and Pharmacy School, Mohammed The Vth University in Rabat                                                                                                          | Chakib NEJJARI; Houda BENRAHMA; Idrissa DIAWARA; Imane SMYEJ; Jalil El ATAR; Jalila RAHOU; Lahcen BELYAMANI and Azeddine IBRAHIMI; Laila SBABOU; Loubna ALLAM; M.W. CHEMAO-ELFHRI; Meriem LAAMARTI; Mouna OUADGHIRI; Rachid EL JAOUDI; Rachid MENTAG; Rokia LAAMARTI; Saaid AMZAZI; Souad KARTTI                                                                                                                                                                                                                                                                                                         |                                                                                                                                                                                                                                                                                                                                                                                                                                                                                                                                                                                                                                                            |
| EPI_ISL_889543, EPI_ISL_1913263                                                                                                                                                                                                                                                                                                                                                                                                                                                                                                                                                                                                                                                                                                                | LSUHS Emerging Viral Threat Laboratory                                                                        | Microbial Genome Sequencing Center                                                                                                                                                                                 | Alexander Mijalis; Andrew D. Yurochko; Camille F. Abshire; Christopher G. Kevill; Daniel J. Snyder; Gregory L. Ware; Jennifer L. Carroll; Jeremy P. Kamil; John A. Vanchiere; Maarten Van Diest; Martin J. Sapp; Mohammed N.A. Siddique; Rona S. Scott; Vaughn S. Cooper                                                                                                                                                                                                                                                                                                                                 |                                                                                                                                                                                                                                                                                                                                                                                                                                                                                                                                                                                                                                                            |
| EPI_ISL_475082, EPI_ISL_717592                                                                                                                                                                                                                                                                                                                                                                                                                                                                                                                                                                                                                                                                                                                 | Lab voor klinische biologie                                                                                   | Onderzoeksgroep Virologie                                                                                                                                                                                          | Bruno Verhassel; Hans Nauwynck; Laurens Lambrechts; Linos Vandekerckhove; Marthe Pauwels; Nick Vereecke; Sebastiaan Theuns                                                                                                                                                                                                                                                                                                                                                                                                                                                                               |                                                                                                                                                                                                                                                                                                                                                                                                                                                                                                                                                                                                                                                            |
| EPI_ISL_775596                                                                                                                                                                                                                                                                                                                                                                                                                                                                                                                                                                                                                                                                                                                                 | Lab. Biologi Molekular FKIK Unwar, Bali                                                                       | National Institute of Health Research and Development                                                                                                                                                              | AA; Dewi; HA; HD; Ikawati; KD; KNA; N; Nugraha; Pangesti; Pawestri; Puspa; Puspandari; SR; Setiawaty; Soekarso; Subangkit; T; V                                                                                                                                                                                                                                                                                                                                                                                                                                                                          |                                                                                                                                                                                                                                                                                                                                                                                                                                                                                                                                                                                                                                                            |
| EPI_ISL_1239665                                                                                                                                                                                                                                                                                                                                                                                                                                                                                                                                                                                                                                                                                                                                | Lab. Biologii molekularnej USK                                                                                | National Institute of Public Health - National Institute of Hygiene; 2. Eurofins Genomics Europe Sequencing GmbH                                                                                                   | ECDC COVID-19 WGS support team; Eurofins Genomics Europe Sequencing Team; Gierczynski Rafal; Sadkowska-Todys Malgorzata; Wolkowicz Tomasz; Zacharczuk Katarzyna                                                                                                                                                                                                                                                                                                                                                                                                                                          |                                                                                                                                                                                                                                                                                                                                                                                                                                                                                                                                                                                                                                                            |
| EPI_ISL_2844508                                                                                                                                                                                                                                                                                                                                                                                                                                                                                                                                                                                                                                                                                                                                | Lab. Microbiologia e Virologia Cotugno A.O. del Colli - Istituto Zooprofilattico Sperimentale del Mezzogiorno | TIGEM                                                                                                                                                                                                              | Antonio Grimaldi Patrizia Annunziata Francesco Panariello Biancamaria Pierrri Claudia Tiberio Teresa Giuliano Valentina Bouche Chiara Colantuono Maria Concetta Cuomo Denise Di Concilio Lucio Di Filippo Anna Manfredi Marcello Salvi Antonio Limone Luigi Atripaldi Pellegrino Cerino Andrea Ballabio Davide Cacchiarelli                                                                                                                                                                                                                                                                              |                                                                                                                                                                                                                                                                                                                                                                                                                                                                                                                                                                                                                                                            |
| EPI_ISL_1154601                                                                                                                                                                                                                                                                                                                                                                                                                                                                                                                                                                                                                                                                                                                                | LabKom - Labor Augsburg MVZ GmbH                                                                              | Robert Koch Institute                                                                                                                                                                                              |                                                                                                                                                                                                                                                                                                                                                                                                                                                                                                                                                                                                          |                                                                                                                                                                                                                                                                                                                                                                                                                                                                                                                                                                                                                                                            |
| EPI_ISL_1642661, EPI_ISL_2260869, EPI_ISL_2314139                                                                                                                                                                                                                                                                                                                                                                                                                                                                                                                                                                                                                                                                                              | LabKom - Labor Hannover MVZ GmbH                                                                              | Robert Koch Institute                                                                                                                                                                                              |                                                                                                                                                                                                                                                                                                                                                                                                                                                                                                                                                                                                          |                                                                                                                                                                                                                                                                                                                                                                                                                                                                                                                                                                                                                                                            |
| EPI_ISL_2260098                                                                                                                                                                                                                                                                                                                                                                                                                                                                                                                                                                                                                                                                                                                                | LabKom - Labor Mainz MVZ GmbH                                                                                 | Robert Koch Institute                                                                                                                                                                                              |                                                                                                                                                                                                                                                                                                                                                                                                                                                                                                                                                                                                          |                                                                                                                                                                                                                                                                                                                                                                                                                                                                                                                                                                                                                                                            |
| EPI_ISL_456211, EPI_ISL_456393, EPI_ISL_579106, EPI_ISL_579425, EPI_ISL_637092, EPI_ISL_661258, EPI_ISL_661261, EPI_ISL_661262, EPI_ISL_755631, EPI_ISL_794619, EPI_ISL_877212, EPI_ISL_1016858, EPI_ISL_1016867, EPI_ISL_1082265, EPI_ISL_1172031, EPI_ISL_1315312, EPI_ISL_1469088, EPI_ISL_1469093, EPI_ISL_1469097, EPI_ISL_1469107, EPI_ISL_1621303, EPI_ISL_1621304, EPI_ISL_1621309, EPI_ISL_1621314, EPI_ISL_1621316, EPI_ISL_1621319, EPI_ISL_1904850, EPI_ISL_1904853, EPI_ISL_1967901, EPI_ISL_1967902, EPI_ISL_2103202, EPI_ISL_2406489, EPI_ISL_2406490, EPI_ISL_2406495, EPI_ISL_2650017, EPI_ISL_2650021, EPI_ISL_2650022, EPI_ISL_2650024, EPI_ISL_2964924, EPI_ISL_2964927, EPI_ISL_2964930, EPI_ISL_2964932, EPI_ISL_2964935 | see above                                                                                                     | LabPLUS                                                                                                                                                                                                            | Institute of Environmental Science and Research (ESR)                                                                                                                                                                                                                                                                                                                                                                                                                                                                                                                                                    | Anja Werno; Antje van der Linden; Arlo Upton; Chris Mansell; David Hammer; Dragana Drinkovic; Erasmus Smit; Gary McAuliffe; Hana Sofia Andersson; Hermes Perez; James Ussher; Jill Sherwood; Jing Wang; Joep de Ligt; Josh Freeman; Julia Howard; Juliet Elvy; Lauren Jelly; Mary DeAlmeida; Matt Blakiston; Matt Storey; Matthew Rogers; Max Bloomfield; Michael Addidle; Michelle Balm; Muhammad Faisal; Nikki Freed; Olin Silander; Olivia Stroeven; Rachel Boyle; Sally Roberts; SallyAnn Harbison; Sarah Jefferies; Sharmini Muttaiyah; Susan Morpeth; Susan Taylor; Timothy Blackmore; Vani Sathyendran; Veronica Playle; Virginia Hope; Xiaoyun Ren |
| EPI_ISL_548013                                                                                                                                                                                                                                                                                                                                                                                                                                                                                                                                                                                                                                                                                                                                 | LabTests                                                                                                      | Institute of Environmental Science and Research (ESR)                                                                                                                                                              | Anja Werno; Antje van der Linden; Arlo Upton; Chris Mansell; David Hammer; Dragana Drinkovic; Erasmus Smit; Gary McAuliffe; Hana Sofia Andersson; Hermes Perez; James Ussher; Jill Sherwood; Jing Wang; Joep de Ligt; Josh Freeman; Julia Howard; Juliet Elvy; Lauren Jelly; Mary DeAlmeida; Matt Blakiston; Matt Storey; Matthew Rogers; Max Bloomfield; Michael Addidle; Michelle Balm; Muhammad Faisal; Nikki Freed; Olin Silander; Sally Roberts; Sarah Jefferies; Sharmini Muttaiyah; Susan Morpeth; Susan Taylor; Timothy Blackmore; Vani Sathyendran; Veronica Playle; Virginia Hope; Xiaoyun Ren |                                                                                                                                                                                                                                                                                                                                                                                                                                                                                                                                                                                                                                                            |
| EPI_ISL_912603, EPI_ISL_1219949, EPI_ISL_1821587, EPI_ISL_2029615, EPI_ISL_2029621, EPI_ISL_2029888, EPI_ISL_2029936, EPI_ISL_2030060                                                                                                                                                                                                                                                                                                                                                                                                                                                                                                                                                                                                          | see above                                                                                                     | Labo Analyses Med                                                                                                                                                                                                  | National Reference Center for Viruses of Respiratory Infections, Institut Pasteur, Paris                                                                                                                                                                                                                                                                                                                                                                                                                                                                                                                 | Adamou Lagare; Amaury Vaysse; Angela Brisebarre; Briec Gestin; Camille Capel; Christophe Malabat; Corinne Maufrais; Durivaut Jérôme; Emmanuelle Permal; Etienne Simon-Lorière; Frédéric Lemoine; Gael Millot; Louise Lefrançois; Marion Barbet; Maud Vanpeene; Méline Bizard; Patricia Tamy; Sylvaine Bastian; Sylvie Behillil; Sylvie Van der Werf; Sylvie van der Werf; Vincent Enour                                                                                                                                                                                                                                                                    |
| EPI_ISL_2003054                                                                                                                                                                                                                                                                                                                                                                                                                                                                                                                                                                                                                                                                                                                                | Labolatorium Biologi Molekularnej USK                                                                         | 1. Academic Center for Pathomorphological and Genetic-Molecular Diagnostics Ltd, Białystok, Poland 2. National Institute of Public Health - National Institute of Hygiene, Warsaw, Poland                          | Anetta Sulewska; Jacek Nikiłski; Janusz Dzięcioł; Joanna Kisłuk; Katarzyna Zacharczuk; Konrad Raczkowski; Magdalena Nowakowska; Malgorzata Sadkowska-Todys; Piotr Karabowicz; Piotr Majewski; Przemyslaw Bielek; Joanna Reszcę; Radoslaw Charkiewicz; Tomasz Wolkowicz                                                                                                                                                                                                                                                                                                                                   |                                                                                                                                                                                                                                                                                                                                                                                                                                                                                                                                                                                                                                                            |
| EPI_ISL_1746802                                                                                                                                                                                                                                                                                                                                                                                                                                                                                                                                                                                                                                                                                                                                | Labolatorium Biologi Molekularnej USK                                                                         | 1. National Institute of Public Health - National Institute of Hygiene; 2. Eurofins Genomics Europe Sequencing GmbH                                                                                                | ECDC COVID-19 WGS support team; Eurofins Genomics Europe Sequencing Team; Gierczynski Rafal; Sadkowska-Todys Malgorzata; Wolkowicz Tomasz; Zacharczuk Katarzyna                                                                                                                                                                                                                                                                                                                                                                                                                                          |                                                                                                                                                                                                                                                                                                                                                                                                                                                                                                                                                                                                                                                            |
| EPI_ISL_2897150                                                                                                                                                                                                                                                                                                                                                                                                                                                                                                                                                                                                                                                                                                                                | Labolatorium Biologi Molekularnej USK                                                                         | 1. Tricity SARS-CoV-2 sequencing consortium; University of Gdansk, Medical University of Gdansk, Vaxican Ltd., Invicta Ltd. 2. National Institute of Public Health - National Institute of Hygiene, Warsaw, Poland | Celina Cymbulska; Karolina Gackowska; Katarzyna Groth; Katarzyna Zacharczuk; Krystyna Bienkowska Szewczyk; Lukasz Rabalski; Maciej Grzybek; Maciej Kosinski; Magdalena Nowakowska; Marcin Lubocki; Malgorzata Sadkowska-Todys; Tomasz Wolkowicz                                                                                                                                                                                                                                                                                                                                                          |                                                                                                                                                                                                                                                                                                                                                                                                                                                                                                                                                                                                                                                            |
| EPI_ISL_2761448                                                                                                                                                                                                                                                                                                                                                                                                                                                                                                                                                                                                                                                                                                                                | Labor 28 MVZ GmbH                                                                                             | Robert Koch Institute                                                                                                                                                                                              |                                                                                                                                                                                                                                                                                                                                                                                                                                                                                                                                                                                                          |                                                                                                                                                                                                                                                                                                                                                                                                                                                                                                                                                                                                                                                            |
| EPI_ISL_2845726                                                                                                                                                                                                                                                                                                                                                                                                                                                                                                                                                                                                                                                                                                                                | Labor Becker & Kollegen (Standort München)                                                                    | Robert Koch Institute                                                                                                                                                                                              |                                                                                                                                                                                                                                                                                                                                                                                                                                                                                                                                                                                                          |                                                                                                                                                                                                                                                                                                                                                                                                                                                                                                                                                                                                                                                            |
| EPI_ISL_2390079                                                                                                                                                                                                                                                                                                                                                                                                                                                                                                                                                                                                                                                                                                                                | Labor Blackholm MVZ                                                                                           | Robert Koch Institute                                                                                                                                                                                              |                                                                                                                                                                                                                                                                                                                                                                                                                                                                                                                                                                                                          |                                                                                                                                                                                                                                                                                                                                                                                                                                                                                                                                                                                                                                                            |
| EPI_ISL_1463910, EPI_ISL_1716024, EPI_ISL_1862119, EPI_ISL_1862322, EPI_ISL_2384709                                                                                                                                                                                                                                                                                                                                                                                                                                                                                                                                                                                                                                                            | Labor Dr. Fenner und Kollegen                                                                                 | Heinrich Pette Institute, Leibniz Institute for Experimental Virology                                                                                                                                              | Adam Grundhoff; Alexis Robitaille; Johannes Knobloch; Martin Aepfelbacher; Nicole Fischer; Thomas Günther                                                                                                                                                                                                                                                                                                                                                                                                                                                                                                |                                                                                                                                                                                                                                                                                                                                                                                                                                                                                                                                                                                                                                                            |
| EPI_ISL_2129685                                                                                                                                                                                                                                                                                                                                                                                                                                                                                                                                                                                                                                                                                                                                | Labor Dr. Heidrich & Kollegen MVZ GmbH Hamburg                                                                | Robert Koch Institute                                                                                                                                                                                              |                                                                                                                                                                                                                                                                                                                                                                                                                                                                                                                                                                                                          |                                                                                                                                                                                                                                                                                                                                                                                                                                                                                                                                                                                                                                                            |
| EPI_ISL_2125015                                                                                                                                                                                                                                                                                                                                                                                                                                                                                                                                                                                                                                                                                                                                | Labor Dr. Wisplinghoff - Köln                                                                                 | Robert Koch Institute                                                                                                                                                                                              |                                                                                                                                                                                                                                                                                                                                                                                                                                                                                                                                                                                                          |                                                                                                                                                                                                                                                                                                                                                                                                                                                                                                                                                                                                                                                            |
| EPI_ISL_1850332                                                                                                                                                                                                                                                                                                                                                                                                                                                                                                                                                                                                                                                                                                                                | Labor Dr. Wisplinghoff - Köln                                                                                 | Robert Koch Institute                                                                                                                                                                                              |                                                                                                                                                                                                                                                                                                                                                                                                                                                                                                                                                                                                          |                                                                                                                                                                                                                                                                                                                                                                                                                                                                                                                                                                                                                                                            |
| EPI_ISL_1215851,                                                                                                                                                                                                                                                                                                                                                                                                                                                                                                                                                                                                                                                                                                                               | Labor Dr. Wisplinghoff - Köln                                                                                 | Robert Koch Institute                                                                                                                                                                                              |                                                                                                                                                                                                                                                                                                                                                                                                                                                                                                                                                                                                          |                                                                                                                                                                                                                                                                                                                                                                                                                                                                                                                                                                                                                                                            |

|                                                                                                                                                                                                                                                                                                                                                                                                                                                                                                                                                                                                                                                                                                                                                                                                                                                                                                                                                                                                                                                                                                    |                                                                                                                                                                                                                       |                                                                                                                                                                                   |                                                                                                                                                                                                                                                                                                                                                                                                                                                                                                                                                                                                                                                                                                                                                                                                                                                                                                                                                                                                                                                                                                                                            |
|----------------------------------------------------------------------------------------------------------------------------------------------------------------------------------------------------------------------------------------------------------------------------------------------------------------------------------------------------------------------------------------------------------------------------------------------------------------------------------------------------------------------------------------------------------------------------------------------------------------------------------------------------------------------------------------------------------------------------------------------------------------------------------------------------------------------------------------------------------------------------------------------------------------------------------------------------------------------------------------------------------------------------------------------------------------------------------------------------|-----------------------------------------------------------------------------------------------------------------------------------------------------------------------------------------------------------------------|-----------------------------------------------------------------------------------------------------------------------------------------------------------------------------------|--------------------------------------------------------------------------------------------------------------------------------------------------------------------------------------------------------------------------------------------------------------------------------------------------------------------------------------------------------------------------------------------------------------------------------------------------------------------------------------------------------------------------------------------------------------------------------------------------------------------------------------------------------------------------------------------------------------------------------------------------------------------------------------------------------------------------------------------------------------------------------------------------------------------------------------------------------------------------------------------------------------------------------------------------------------------------------------------------------------------------------------------|
| EPI_ISL_2266929<br>EPI_ISL_803955                                                                                                                                                                                                                                                                                                                                                                                                                                                                                                                                                                                                                                                                                                                                                                                                                                                                                                                                                                                                                                                                  | Labor Dr. Wiplinghoff - Köln                                                                                                                                                                                          | Robert Koch Institute, Influenza and respiratory viruses FG17 & Bioinformatics MF1, Berlin, Germany                                                                               | Aleksandar Radonic; Dr. R. Grosser; Marianne Wedde; Oliver Drechsel; Ralf Duerrwald; Rene Kmiecinski; Stefan Kroeger; Stephan Fuchs; Thorsten Wolff                                                                                                                                                                                                                                                                                                                                                                                                                                                                                                                                                                                                                                                                                                                                                                                                                                                                                                                                                                                        |
| EPI_ISL_304981<br>EPI_ISL_1140227,<br>EPI_ISL_1140343,<br>EPI_ISL_1140360,<br>EPI_ISL_1285209<br>EPI_ISL_775220                                                                                                                                                                                                                                                                                                                                                                                                                                                                                                                                                                                                                                                                                                                                                                                                                                                                                                                                                                                    | Labor Mönchengladbach MVZ Dr. Stein + Kollegen GbR<br>Labor ZOTZ/KLIMAS; MVZ Düsseldorf-Centrum                                                                                                                       | Robert Koch Institute<br>Robert Koch Institute                                                                                                                                    |                                                                                                                                                                                                                                                                                                                                                                                                                                                                                                                                                                                                                                                                                                                                                                                                                                                                                                                                                                                                                                                                                                                                            |
| EPI_ISL_1508956,<br>EPI_ISL_1575436,<br>EPI_ISL_1575441,<br>EPI_ISL_1675141                                                                                                                                                                                                                                                                                                                                                                                                                                                                                                                                                                                                                                                                                                                                                                                                                                                                                                                                                                                                                        | Laboratoire Biolife<br>Laboratoire Biolim/FSS/JUL                                                                                                                                                                     | Laboratoire de Biotechnologie<br>Unité Mixte Internationale TransVIHMI (UMI 233 IRD - U1175 INSERM - Université de Montpellier) IRD (Institut de recherche pour le développement) | Afaf Alaoui; Amina Benouda; Bouchra Belfquih; Hanae Dakka; Lahcen belyamani; Mohamed Chenaoui; Mohammed Walid Chemaou Eifihri; Mouna Ouadghiri; Otmane Touzani; Saaid Amzazi and Azeddine Ibrahim; Tarik Aanniz<br>Abba A. KONOU; Adodo SADJI; Ahidjo AYOUBA; Akoléé SILIADIN; Alassane OURO-MEDEL; Amivi EHLAN; Améyo DORKENO; Anoumou DAGNRA; Christelle BUTEL; Délima MABA; Eric DELAPORTE; Issaka Maman; Koku TEGUENI; Koku AGBODEKA; Laetitia SERRANO; Martine PEETERS; Messanh DOUFFAN; Mireille PRINCE-DAVID; Mounerou SALOU; Sidonie A.M.KAGNISSODE; Sika DOSSIM; Syntyche DEVATCHAGNI; Wembo A. HALATOKO                                                                                                                                                                                                                                                                                                                                                                                                                                                                                                                          |
| EPI_ISL_2835003                                                                                                                                                                                                                                                                                                                                                                                                                                                                                                                                                                                                                                                                                                                                                                                                                                                                                                                                                                                                                                                                                    | Laboratoire Central Analyse Médicale mohammedia                                                                                                                                                                       | Functional Genomic Platform_UATRS_CNIRST_Rabat                                                                                                                                    | Amina Barkat; Belayachi Lamiae; Elmostafa El fahime; Hajjaji Mohammed; Hasnae Benkirane; Hassan Aguenoua; Jaafar Heikel; Marouane Melloul; Mouhcine Gardoul; Mouhsine Hemlali; Nadia Touli; Oumaima Ait Si Mohammed; Sanaa Alaoui-Amine; Taha Chouati Omar Askander                                                                                                                                                                                                                                                                                                                                                                                                                                                                                                                                                                                                                                                                                                                                                                                                                                                                        |
| EPI_ISL_1905079,<br>EPI_ISL_2318037                                                                                                                                                                                                                                                                                                                                                                                                                                                                                                                                                                                                                                                                                                                                                                                                                                                                                                                                                                                                                                                                | Laboratoire Central de Virologie                                                                                                                                                                                      | Laboratoire de Biotechnologie                                                                                                                                                     | Abdelmunim Essabbar; Amal Zouaki; Ghizlane EL Amin; Hakima Kabbaj; Lahcen Belyamani and Azeddine Ibrahim; Mouna Ouadghiri; Myriam Seffar; Naima El Hafidi; Saaid Amzazi; Tarik Aanniz                                                                                                                                                                                                                                                                                                                                                                                                                                                                                                                                                                                                                                                                                                                                                                                                                                                                                                                                                      |
| EPI_ISL_2978186, EPI_ISL_2978187, EPI_ISL_2978188, EPI_ISL_2978191, EPI_ISL_2978195, EPI_ISL_2978196, EPI_ISL_2978200, EPI_ISL_2978201, EPI_ISL_2978203, EPI_ISL_2978206, EPI_ISL_2978211, EPI_ISL_2978223, EPI_ISL_2978224, EPI_ISL_2978225, EPI_ISL_2978226, EPI_ISL_2978236                                                                                                                                                                                                                                                                                                                                                                                                                                                                                                                                                                                                                                                                                                                                                                                                                     | see above<br>Laboratoire National de Santé Publique, Brazzaville, République du Congo                                                                                                                                 | Pathogen Genomics Lab, National Institute for Biomedical Research (INRB)                                                                                                          | Amuri Aziza; Andrew Rambaut; Catherine Pratt; Eddy Kinganda-Lusamaki; Edith Nkwembe; Emmanuel Lokilo Lofiko; Fabien Rok Niam; Francisca Muyembe Mawete; Gabriel Kabamba; Ian Goodfellow; Jean Claude Makangara; Jean-Jacques Muyembe Tamfum; Josh Quick; Matthias Pauthner; Michael Wiley; Nick Loman; Placide Mbala-Kingebeni; Raphael Lumembe; Steve Ahuka-Mundeke; Trevor Bedford                                                                                                                                                                                                                                                                                                                                                                                                                                                                                                                                                                                                                                                                                                                                                       |
| EPI_ISL_459898                                                                                                                                                                                                                                                                                                                                                                                                                                                                                                                                                                                                                                                                                                                                                                                                                                                                                                                                                                                                                                                                                     | Laboratoire National de Santé, Microbiology, Virology                                                                                                                                                                 | Laboratoire National de Santé, Microbiology, Epidemiology and Microbial Genomics                                                                                                  | Anke Wienecke-Baldacchino; Catherine Ragimbeau; Guillaume Fournier; Jessica Tapp; Tamir Abdelrahman; Trung Nguyen Nguyen                                                                                                                                                                                                                                                                                                                                                                                                                                                                                                                                                                                                                                                                                                                                                                                                                                                                                                                                                                                                                   |
| EPI_ISL_1972306                                                                                                                                                                                                                                                                                                                                                                                                                                                                                                                                                                                                                                                                                                                                                                                                                                                                                                                                                                                                                                                                                    | Laboratoire National de Santé Publique du Cameroun                                                                                                                                                                    | Pathogen Genomics Lab, National Institute for Biomedical Research (INRB)                                                                                                          | Amuri Aziza; Andrew Rambaut; Catherine Pratt; Eddy Kinganda-Lusamaki; Edith Nkwembe; Emmanuel Lokilo Lofiko; Francisca Muyembe Mawete; Gabriel Kabamba; Ian Goodfellow; Jean Claude Makangara; Jean-Jacques Muyembe Tamfum; Josh Quick; Marie Claire Okomo; Matthias Pauthner; Michael Wiley; Nick Loman; Placide Mbala-Kingebeni; Raphael Lumembe; Steve Ahuka-Mundeke; Trevor Bedford                                                                                                                                                                                                                                                                                                                                                                                                                                                                                                                                                                                                                                                                                                                                                    |
| EPI_ISL_2157560,<br>EPI_ISL_2492505,<br>EPI_ISL_2492517,<br>EPI_ISL_2492525                                                                                                                                                                                                                                                                                                                                                                                                                                                                                                                                                                                                                                                                                                                                                                                                                                                                                                                                                                                                                        | Laboratoire National de Santé Publique - LNSP (HAITI) - LNSP                                                                                                                                                          | Laboratory of Respiratory Viruses and Measles, Oswaldo Cruz Institute, FIOCRUZ                                                                                                    | Alice Sampaio Rocha; Ana Carolina Mendonca; Anna Carolina Paixao; Elisa Cavalcante Pereira; Fernando Motta; Ito Jourmel; Jaques Boncy; Luciana Appolinario; Marilda Siqueira on behalf of the Fiocruz COVID-19 Genomic Surveillance Network; Paola Resende; Patrick Dely; Renata Serrano Lopes; Taina Venas                                                                                                                                                                                                                                                                                                                                                                                                                                                                                                                                                                                                                                                                                                                                                                                                                                |
| EPI_ISL_1760554                                                                                                                                                                                                                                                                                                                                                                                                                                                                                                                                                                                                                                                                                                                                                                                                                                                                                                                                                                                                                                                                                    | Laboratoire Professeur Daniel GAHOUMA (LPDG)                                                                                                                                                                          | Centre de recherches médicales de Lambaréné (CERMEL)                                                                                                                              | Ayola A. Adegnika; Ayong Moure; Bertrand Lel; Bénédicte Ndeboko; Emilio Skarwan; Georgelin Nguema Ondo; Gédéon P. Manouana; Haruka Abe; Jiro Yasuda; Joel Fleury Djoba Siawaya; Rodrigue Bikangu; Rotimi Myrabelle Avome Houecheou; Samira Zoa-Assoumou; Yuri Ushijima                                                                                                                                                                                                                                                                                                                                                                                                                                                                                                                                                                                                                                                                                                                                                                                                                                                                     |
| EPI_ISL_2373998<br>EPI_ISL_1103576,<br>EPI_ISL_1810947,<br>EPI_ISL_1896699,<br>EPI_ISL_1904886                                                                                                                                                                                                                                                                                                                                                                                                                                                                                                                                                                                                                                                                                                                                                                                                                                                                                                                                                                                                     | Laboratoire Virologie Saint Louis APHP<br>Laboratoire central de Virologie                                                                                                                                            | Laboratoire Virologie Saint Louis APHP<br>Laboratoire de Biotechnologie                                                                                                           | Constance Delaunay; Jérôme Le Goff; Linda Feghout; Marie Laure Chaix; Marie Laure Néré; Maud Salmona; Severine Mercier Delarue; Sophia Achaïbou<br>Abdelmunim Essabbar; Amal Zouaki; Ghizlane EL Amin; Hakima Kabbaj; Lahcen Belyamani and Azeddine Ibrahim; Mouna Ouadghiri; Myriam Seffar; Saaid Amzazi; Tarik Aanniz                                                                                                                                                                                                                                                                                                                                                                                                                                                                                                                                                                                                                                                                                                                                                                                                                    |
| EPI_ISL_2227202,<br>EPI_ISL_2227203                                                                                                                                                                                                                                                                                                                                                                                                                                                                                                                                                                                                                                                                                                                                                                                                                                                                                                                                                                                                                                                                | Laboratoire d'analyse biomédicale du camp Ouezzin Coulibaly                                                                                                                                                           | Centre Muraz                                                                                                                                                                      | Abdoul-Salam Ouedraogo; Amariane Koné; Armel Poda; Arsène Zongo; Essia Belarbi; Fabian Leendertz; Grit Schubert; Halidou Tinto; Soumeya Ouangraoua; Thérèse Kagoné; Yacouba Sawadogo; Zekiba Tarnagda                                                                                                                                                                                                                                                                                                                                                                                                                                                                                                                                                                                                                                                                                                                                                                                                                                                                                                                                      |
| EPI_ISL_2820514                                                                                                                                                                                                                                                                                                                                                                                                                                                                                                                                                                                                                                                                                                                                                                                                                                                                                                                                                                                                                                                                                    | Laboratoire de Diagnostic, Centre de Soins 1, Caisse Nationale de Sécurité Sociale (CNSS) de Djibouti                                                                                                                 | IHU Méditerranée Infection                                                                                                                                                        | Anthony Levasseur; Christian A. Devaux.; Didier Raoult; Idil Salah abdillahi; Ikram Omar Osman; Iman Abdillahi Hassan; Jeremy Delerce; Linda Houhamdi; Ludivine Brechar; Mohamed Houmed Aboubaker; Philippe Colson; Pierre-Edouard Fournier; Zeinab Ali Waberi                                                                                                                                                                                                                                                                                                                                                                                                                                                                                                                                                                                                                                                                                                                                                                                                                                                                             |
| EPI_ISL_2820520                                                                                                                                                                                                                                                                                                                                                                                                                                                                                                                                                                                                                                                                                                                                                                                                                                                                                                                                                                                                                                                                                    | Laboratoire de Diagnostic, Centre de Soins 1, Caisse Nationale de Sécurité Sociale (CNSS) de Djibouti,                                                                                                                | IHU Méditerranée Infection.                                                                                                                                                       | Anthony Levasseur; Christian A. Devaux.; Didier Raoult; Idil Salah abdillahi; Ikram Omar Osman; Iman Abdillahi Hassan; Jeremy Delerce; Linda Houhamdi; Ludivine Brechar; Mohamed Houmed Aboubaker; Philippe Colson; Pierre-Edouard Fournier; Zeinab Ali Waberi                                                                                                                                                                                                                                                                                                                                                                                                                                                                                                                                                                                                                                                                                                                                                                                                                                                                             |
| EPI_ISL_2820626                                                                                                                                                                                                                                                                                                                                                                                                                                                                                                                                                                                                                                                                                                                                                                                                                                                                                                                                                                                                                                                                                    | Laboratoire de Diagnostic, Centre de Soins 1, Caisse Nationale de Sécurité Sociale (CNSS) de Djibouti.                                                                                                                | IHU Méditerranée Infection.                                                                                                                                                       | Anthony Levasseur; Christian A. Devaux.; Didier Raoult; Idil Salah abdillahi; Ikram Omar Osman; Iman Abdillahi Hassan; Jeremy Delerce; Linda Houhamdi; Ludivine Brechar; Mohamed Houmed Aboubaker; Philippe Colson; Pierre-Edouard Fournier; Zeinab Ali Waberi                                                                                                                                                                                                                                                                                                                                                                                                                                                                                                                                                                                                                                                                                                                                                                                                                                                                             |
| EPI_ISL_660448, EPI_ISL_660452, EPI_ISL_660471, EPI_ISL_660477, EPI_ISL_660478, EPI_ISL_660479, EPI_ISL_660492, EPI_ISL_660499, EPI_ISL_660515, EPI_ISL_2142708, EPI_ISL_2142721, EPI_ISL_2142743                                                                                                                                                                                                                                                                                                                                                                                                                                                                                                                                                                                                                                                                                                                                                                                                                                                                                                  | see above<br>Laboratoire de Microbiologie CHU Sourou Sanou                                                                                                                                                            | Centre Muraz                                                                                                                                                                      | Abdoul-Salam Ouedraogo; Amariane Koné; Armel Poda; Arsène Zongo; Essia Belarbi; Fabian Leendertz; Grit Schubert; Halidou Tinto; Lassana Sangaré; Soumeya Ouangraoua; Thérèse Kagoné; Yacouba Sawadogo; Zekiba Tarnagda                                                                                                                                                                                                                                                                                                                                                                                                                                                                                                                                                                                                                                                                                                                                                                                                                                                                                                                     |
| EPI_ISL_2289108<br>EPI_ISL_1116464,<br>EPI_ISL_1116467,<br>EPI_ISL_1116468,<br>EPI_ISL_1118923                                                                                                                                                                                                                                                                                                                                                                                                                                                                                                                                                                                                                                                                                                                                                                                                                                                                                                                                                                                                     | Laboratoire de Microbiologie CHU Sourou Sanou<br>Laboratoire de Microbiologie- CHU Habib Bourguiba - Sfax                                                                                                             | Laboratoire bacteriologie virologie CHUSS<br>Laboratoire des Procédés de Criblage Moléculaire et Cellulaire-Centre de Biotechnologie de Sfax                                      | Abdoul-Salam Ouedraogo; Abdoullie Kante; Abdul Sesay; Annette Erhart; Armel Poda; François Kiemdi; Halidou Tinto; Mariama Kujabi; Yacouba Sawadogo<br>A. and Masmoudi, S.; Abdelmoulah, F.; Abid, N.; Ajili, F.; Aouni, M.; Ben Ayed, I.; Bensaïd, M.; Chtourou, A.; Elargoubi, A.; Fki-berrajah, L.; Ghaloul, I.; Gargouri, S.; Hammami, A.; Kamoun, S.; Karray Hakim, H.; Kharat, N.; Mastouri, M.; Mhalla, S.; Nabili, A.; Rebai; Smeti, I.; Souissi, A.; Stambouli, N.; Turki, M.                                                                                                                                                                                                                                                                                                                                                                                                                                                                                                                                                                                                                                                      |
| EPI_ISL_414600                                                                                                                                                                                                                                                                                                                                                                                                                                                                                                                                                                                                                                                                                                                                                                                                                                                                                                                                                                                                                                                                                     | Laboratoire de Virologie Institut de Virologie - INSERM U 1109 Hôpitaux Universitaires de Strasbourg                                                                                                                  | National Reference Center for Viruses of Respiratory Infections, Institut Pasteur, Paris                                                                                          | Angela Brisebarre; Flora Donati Vincent Enouf; Marion Barbet; Maud Vanpeene; Méline Bizard; Mélinie Albert; Samira Fafi-Kremer; Sylvie Behillili; Sylvie van der Werf                                                                                                                                                                                                                                                                                                                                                                                                                                                                                                                                                                                                                                                                                                                                                                                                                                                                                                                                                                      |
| EPI_ISL_825711, EPI_ISL_890133, EPI_ISL_890145, EPI_ISL_890158, EPI_ISL_1366018, EPI_ISL_1379080, EPI_ISL_1400646, EPI_ISL_1400702, EPI_ISL_1400733, EPI_ISL_1403232, EPI_ISL_1403325, EPI_ISL_1403327, EPI_ISL_1523424, EPI_ISL_1534163, EPI_ISL_1696760, EPI_ISL_1696761, EPI_ISL_1696762, EPI_ISL_1696763, EPI_ISL_1696764, EPI_ISL_1696765, EPI_ISL_1696818, EPI_ISL_1696894, EPI_ISL_1696913, EPI_ISL_1697201, EPI_ISL_1697202, EPI_ISL_1697205, EPI_ISL_1697207, EPI_ISL_2007710, EPI_ISL_2097640, EPI_ISL_2293901, EPI_ISL_2386272, EPI_ISL_2390825, EPI_ISL_2390950, EPI_ISL_2821389, EPI_ISL_2821439, EPI_ISL_2821747, EPI_ISL_2822078, EPI_ISL_2822086, EPI_ISL_2822095, EPI_ISL_2822121, EPI_ISL_2822220, EPI_ISL_2822230, EPI_ISL_2822242, EPI_ISL_2822257, EPI_ISL_2822259, EPI_ISL_2824272, EPI_ISL_2824348, EPI_ISL_2824702, EPI_ISL_2824716, EPI_ISL_2824921, EPI_ISL_2824929, EPI_ISL_28290215, EPI_ISL_28290217, EPI_ISL_28290307, EPI_ISL_28290418, EPI_ISL_28290502, EPI_ISL_28290507, EPI_ISL_28290509, EPI_ISL_28290529, EPI_ISL_28290530, EPI_ISL_28290531, EPI_ISL_3144438 | see above<br>Laboratoire de santé publique du Québec                                                                                                                                                                  | Laboratoire de santé publique du Québec                                                                                                                                           | Guillaume Bourque; Ioannis Ragoussis; Jesse Shapiro; Mark Lathrop and Michel Roger on behalf of the CoVSeQ research group; Mark Lathrop and Michel Roger on behalf of the CoVSeQ research group ( <a href="http://covseq.ca/researchgroup">http://covseq.ca/researchgroup</a> ); Sandrine Moreira                                                                                                                                                                                                                                                                                                                                                                                                                                                                                                                                                                                                                                                                                                                                                                                                                                          |
| EPI_ISL_476822,<br>EPI_ISL_476824,<br>EPI_ISL_476826,<br>EPI_ISL_476829,<br>EPI_ISL_476830,<br>EPI_ISL_476831                                                                                                                                                                                                                                                                                                                                                                                                                                                                                                                                                                                                                                                                                                                                                                                                                                                                                                                                                                                      | Laboratoire des Fièvres Hémorragiques Virales du Benin                                                                                                                                                                | Charité-Universitätsmedizin Berlin                                                                                                                                                | Anges; Drexler; Jan Felix; Moreira-Soto Andres; Sander Anna-Lena; Yadouleton                                                                                                                                                                                                                                                                                                                                                                                                                                                                                                                                                                                                                                                                                                                                                                                                                                                                                                                                                                                                                                                               |
| EPI_ISL_910672,<br>EPI_ISL_910945,<br>EPI_ISL_1383353                                                                                                                                                                                                                                                                                                                                                                                                                                                                                                                                                                                                                                                                                                                                                                                                                                                                                                                                                                                                                                              | Laboratoire national de sante, Microbiology, Virology                                                                                                                                                                 | Laboratoire national de sante, Microbiology, Microbial Genomics Platform                                                                                                          | Anke Wienecke-Baldacchino; Catherine Ragimbeau; Fatu Djabi; Jessica Tapp; Lise Pignon; Raoul Salmon; Tamir Abdelrahman; Trung Nguyen Nguyen                                                                                                                                                                                                                                                                                                                                                                                                                                                                                                                                                                                                                                                                                                                                                                                                                                                                                                                                                                                                |
| EPI_ISL_739880,<br>EPI_ISL_740129                                                                                                                                                                                                                                                                                                                                                                                                                                                                                                                                                                                                                                                                                                                                                                                                                                                                                                                                                                                                                                                                  | Laboratoire national de santé, Microbiology, Virology                                                                                                                                                                 | Laboratoire national de santé, Microbiology, Epidemiology and Microbial Genomics                                                                                                  | Anke Wienecke-Baldacchino; Catherine Ragimbeau; Fatu Djabi; Jessica Tapp; Tamir Abdelrahman; Trung Nguyen Nguyen                                                                                                                                                                                                                                                                                                                                                                                                                                                                                                                                                                                                                                                                                                                                                                                                                                                                                                                                                                                                                           |
| EPI_ISL_739901, EPI_ISL_739947, EPI_ISL_740028, EPI_ISL_744139, EPI_ISL_744561, EPI_ISL_744958, EPI_ISL_771034                                                                                                                                                                                                                                                                                                                                                                                                                                                                                                                                                                                                                                                                                                                                                                                                                                                                                                                                                                                     | see above<br>Laboratoire national de santé, Microbiology, Virology                                                                                                                                                    | Laboratoire national de santé, Microbiology, Microbial Genomics Platform                                                                                                          | Anke Wienecke-Baldacchino; Catherine Ragimbeau; Fatu Djabi; Jessica Tapp; Lise Pignon; Raoul Salmon; Tamir Abdelrahman                                                                                                                                                                                                                                                                                                                                                                                                                                                                                                                                                                                                                                                                                                                                                                                                                                                                                                                                                                                                                     |
| EPI_ISL_1384323                                                                                                                                                                                                                                                                                                                                                                                                                                                                                                                                                                                                                                                                                                                                                                                                                                                                                                                                                                                                                                                                                    | Laboratoires d'analyses medicales - Ketterthill                                                                                                                                                                       | Laboratoire national de sante, Microbiology, Microbial Genomics Platform                                                                                                          | Anke Wienecke-Baldacchino; Caroline Scheiber; Catherine Ragimbeau; Fatu Djabi; Jessica Tapp; Lise Pignon; Raoul Salmon; Serge Vedy; Tamir Abdelrahman                                                                                                                                                                                                                                                                                                                                                                                                                                                                                                                                                                                                                                                                                                                                                                                                                                                                                                                                                                                      |
| EPI_ISL_2645438,<br>EPI_ISL_2863801,<br>EPI_ISL_2863816                                                                                                                                                                                                                                                                                                                                                                                                                                                                                                                                                                                                                                                                                                                                                                                                                                                                                                                                                                                                                                            | Laboratório Central de Saude Publica do Estado do Para (LACEN-PA)                                                                                                                                                     | Laboratory of Respiratory Viruses and Measles, Oswaldo Cruz Institute, FIOCRUZ                                                                                                    | Agatha Cristinne Prudencio Soares; Alice Sampaio Rocha; Ana Carolina Mendonca; Anna Carolina Paixao; Elisa Cavalcante Pereira; Fernando Motta; Igor Leonardo Arantes Gomes; Luciana Appolinario; Marilda Siqueira on behalf of the Fiocruz COVID-19 Genomic Surveillance Network; Paola Resende; Renata Serrano Lopes; Taina Venas; Valnete Andrade                                                                                                                                                                                                                                                                                                                                                                                                                                                                                                                                                                                                                                                                                                                                                                                        |
| EPI_ISL_981041                                                                                                                                                                                                                                                                                                                                                                                                                                                                                                                                                                                                                                                                                                                                                                                                                                                                                                                                                                                                                                                                                     | Laboratorio Central Sección Virología. Hospital Regional Artemides Zatti (Viedma, Rio Negro); Laboratorio MICROBIOM (General Roca, Rio Negro); Hospital Zonal Dr. Ramón Carrillo (San Carlos De Bariloche, Rio Negro) | Laboratorio Central Mg. Luis Alfredo Pianiola on behalf of 'Proyecto Argentino Interinstitucional de genómica de SARS-CoV-2' (PAIS Consortium)                                    | Antonela De Fino; C Pintos; C Ziehm; Darío Fabián di Prátula; J Ousse; L Pianiola.; Liliانا Fonseca; M Fernandez; M Mazzeo; M Nabas; Marcela Nóbile; María Laura Álvarez; Patricia Valeria Blanco; Silvana Cecchi; Yesica Espasandin                                                                                                                                                                                                                                                                                                                                                                                                                                                                                                                                                                                                                                                                                                                                                                                                                                                                                                       |
| EPI_ISL_1288281,<br>EPI_ISL_1811413,<br>EPI_ISL_1811433,<br>EPI_ISL_1811479                                                                                                                                                                                                                                                                                                                                                                                                                                                                                                                                                                                                                                                                                                                                                                                                                                                                                                                                                                                                                        | Laboratorio Central de Epidemiología (LCE)                                                                                                                                                                            | Instituto de Biotecnología de la UNAM                                                                                                                                             | Alejandro Sanchez-Flores; Alfredo Herrera-Estrella; Alicia Ocaña-Mondragón; Angel Gustavo Salas-Lais; Bernardo Martínez-Miguel; Blanca Taboada; Brenda Irasema Maldonado-Meza; Carla Ivón Herrera-Najera; Carlos F. Arias; Celia Boukadida; Clara Esperanza Santacruz-Tinoco; Concepción Grajales-Muñiz; Consorcio Mexicano de Vigilancia Genómica (CoViGen-Mex). Authors (in alphabetical order): Julio Elias Alvarado-Yaah; Célida Duque-Molina; Fernando Fontove-Herrera; Francisco Pulido; Gloria Elena Espinosa-Ayala; Gloria Elena Espinoza-Ayala; Gloria María Molina-Salinas; Gloria Vazquez; Hector Esteban Paz-Juárez; Hector Montoya-Fuentes; Helen Haydee Fernanda Ramirez-Plascencia; Jorge Ivan Sallinal-Navarez; José Antonio Enciso-Moreno; José Esteban Muñoz-Medina; José de Jesús Nuñez-Contreras; Juan Bautista Chale-Dzul; Julio Elias Alvarado-Yaah; Luis Alberto Ochoa-Carrera; Margarita Matias-Florentino; María Guadalupe Santiago-Mauricio; María Guadalupe de Jesús Mireles-Rivera; Nelly Séléem-Mojica; Pavel Isa; Ricardo Grande; Santiago Avila-Rios; Victor Eduardo Garcia-Arias; Victor Hugo Borja-Aburto |
| EPI_ISL_1301498,<br>EPI_ISL_1302158                                                                                                                                                                                                                                                                                                                                                                                                                                                                                                                                                                                                                                                                                                                                                                                                                                                                                                                                                                                                                                                                | Laboratorio Central de Epidemiología IMSS                                                                                                                                                                             | Instituto de Biotecnología de la UNAM                                                                                                                                             | Alejandra Hernández-Terán; Alejandro Sanchez-Flores; Alma Rincón-Rubio; Andrea Santos Coy-Arechavaleta; Authors from IBT; Blanca Taboada; Celia Boukadida; Clara Esperanza Santacruz-Tinoco; Edgar Mendieta-Condado; Eduardo Becerril-Vargas; Fidencio Mejía-Nepomuceno; Francisco Pulido; Gisela Barrera-Badillo; Gloria Vazquez; Hector Esteban Paz-Juárez; IMSS; INDRÉ and INER (in alphabetical order); Carlos F. Arias; Irma Lopez-Martinez; Jerome Jean Verleyen; Joel Armando Vázquez-Pérez; Jorge Salas-Hernández; José Arturo Martínez-Orozco; José Ernesto Ramírez-González; José Esteban Muñoz-Medina; Larissa Fernandes-Matano; Luis Hernandez-Rivas; Luis Alberto Ochoa-Carrera; Margarita Matias-Florentino; Mario Mújica-Sánchez; Natividad Cruz-Ortiz; Pavel Isa; Ricardo Grande; Santiago Avila-Rios; Tatiana Nunez-Garcia; Teresta Rojas-Mendoza                                                                                                                                                                                                                                                                         |
| EPI_ISL_1492641, EPI_ISL_1492656, EPI_ISL_1492658, EPI_ISL_1492661, EPI_ISL_1492666, EPI_ISL_1492672, EPI_ISL_1492675, EPI_ISL_1492679                                                                                                                                                                                                                                                                                                                                                                                                                                                                                                                                                                                                                                                                                                                                                                                                                                                                                                                                                             | see above<br>Laboratorio Central de Salud Publica de Paraguay                                                                                                                                                         | Laboratorio Central de Salud Publica de Paraguay                                                                                                                                  | Andrea Gómez de la Fuente; Cynthia Vázquez; Flavia Aburjaile; Juan Torales; Luiz Carlos Junior Alcantara; Marta Giovanetti; María José Ortega; María Liz Gamarra; Shirley Villaiba; Talita Adelino; Vagner Fonseca                                                                                                                                                                                                                                                                                                                                                                                                                                                                                                                                                                                                                                                                                                                                                                                                                                                                                                                         |
| EPI_ISL_2645411                                                                                                                                                                                                                                                                                                                                                                                                                                                                                                                                                                                                                                                                                                                                                                                                                                                                                                                                                                                                                                                                                    | Laboratório Central de Saude Publica do Estado Maranhao (LACEN-MA)                                                                                                                                                    | Laboratory of Respiratory Viruses and Measles, Oswaldo Cruz Institute, FIOCRUZ                                                                                                    | Alice Sampaio Rocha; Ana Carolina Mendonca; Anna Carolina Paixao; Elisa Cavalcante Pereira; Fernando Motta; Lidio Gonçalves Lima Neto; Luciana Appolinario; Marilda Siqueira on behalf of the Fiocruz COVID-19 Genomic Surveillance Network; Paola Resende; Renata Serrano Lopes; Taina Venas                                                                                                                                                                                                                                                                                                                                                                                                                                                                                                                                                                                                                                                                                                                                                                                                                                              |

|                                                                                                                                                                                                                                                                                                                                                                                      |                                                                                                                                                        |                                                                                                                                                                                                                                                                |                                                                                                                                                                                                                                                                                                                                                                                                                                                                                                                                                                                                                                                                                                                                                                                       |
|--------------------------------------------------------------------------------------------------------------------------------------------------------------------------------------------------------------------------------------------------------------------------------------------------------------------------------------------------------------------------------------|--------------------------------------------------------------------------------------------------------------------------------------------------------|----------------------------------------------------------------------------------------------------------------------------------------------------------------------------------------------------------------------------------------------------------------|---------------------------------------------------------------------------------------------------------------------------------------------------------------------------------------------------------------------------------------------------------------------------------------------------------------------------------------------------------------------------------------------------------------------------------------------------------------------------------------------------------------------------------------------------------------------------------------------------------------------------------------------------------------------------------------------------------------------------------------------------------------------------------------|
| EPI_ISL_2645396, EPI_ISL_2645667                                                                                                                                                                                                                                                                                                                                                     | Laboratorio Central de Saude Publica do Estado de Alagoas (LACEN/AL)                                                                                   | Laboratory of Respiratory Viruses and Measles, Oswaldo Cruz Institute, FIOCRUZ                                                                                                                                                                                 | Alice Sampaio Rocha; Ana Carolina Mendonca; Anderson Brandao Leite; Anna Carolina Paixao; Elisa Cavalcante Pereira; Fernando Motta; Luciana Appolinario; Marilda Siqueira on behalf of the Fiocruz COVID-19 Genomic Surveillance Network; Paola Resende; Renata Serrano Lopes; Taina Venas                                                                                                                                                                                                                                                                                                                                                                                                                                                                                            |
| EPI_ISL_2863619                                                                                                                                                                                                                                                                                                                                                                      | Laboratorio Central de Saude Publica do Estado de Sergipe (LACEN/SE)                                                                                   | Laboratory of Respiratory Viruses and Measles, Oswaldo Cruz Institute, FIOCRUZ                                                                                                                                                                                 | Alice Sampaio Rocha; Ana Carolina Mendonca; Anna Carolina Paixao; Cliomar Alves dos Santos; Elisa Cavalcante Pereira; Fernando Motta; Luciana Appolinario; Marilda Siqueira on behalf of the Fiocruz COVID-19 Genomic Surveillance Network; Paola Resende; Renata Serrano Lopes; Tainá Moreira Martins Venas                                                                                                                                                                                                                                                                                                                                                                                                                                                                          |
| EPI_ISL_3045555                                                                                                                                                                                                                                                                                                                                                                      | Laboratorio Central de Saude Publica do Estado do Espirito Santo (LACEN/ES)                                                                            | Laboratory of Respiratory Viruses and Measles, Oswaldo Cruz Institute, FIOCRUZ                                                                                                                                                                                 | Alice Sampaio Rocha; Ana Carolina Mendonca; Anna Carolina Paixao; Eliisa Cavalcante Pereira; Fernando Motta; Luciana Appolinario; Marilda Siqueira on behalf of the Fiocruz COVID-19 Genomic Surveillance Network; Paola Resende; Renata Serrano Lopes; Rodrigo Ribeiro Rodrigues; Taina Venas                                                                                                                                                                                                                                                                                                                                                                                                                                                                                        |
| EPI_ISL_2775494                                                                                                                                                                                                                                                                                                                                                                      | Laboratorio Central de Saude Publica do Estado do Parana (Instituto de Biologia Molecular do Paraná (LACIEN-PR))                                       | Instituto Carlos Chagas - Fiocruz                                                                                                                                                                                                                              | Alessandra De Melo Aguiar; Andreia Akemi Suzukiwaka; Andréa Rodrigues Ávila; Bruno Dallagiovanna; Dailia Zanette; Eduardo Balsaneli; Emanuel Maltempo de Souza; Fabio Passetti; Fabricio Klerytino Marchini; Fábio de Oliveira Pedrosa; Guilherme Becker; Helisson Faoro; Hellen Geremias dos Santos; Irina Nastassja Riediger; Letusa Albrecht; Lucas Blanes; Luis Gustavo Morello; Lysangela Ronalite Alves; Maria do Carmo Debur; Mauro de Medeiros Oliveira; Michelle Orane Schemberger; Paola Cristina Resende; Sheila Cristina Nardeli; Tiago Gräf; Valter Antônio de Baura                                                                                                                                                                                                     |
| EPI_ISL_2645467, EPI_ISL_2731458                                                                                                                                                                                                                                                                                                                                                     | Laboratorio Central de Saude Publica do Estado do Parana (LACEN/PR)                                                                                    | Laboratory of Respiratory Viruses and Measles, Oswaldo Cruz Institute, FIOCRUZ                                                                                                                                                                                 | Alice Sampaio Rocha; Ana Carolina Mendonca; Anna Carolina Paixao; Elisa Cavalcante Pereira; Fernando Motta; Irina Riediger; Luciana Appolinario; Marilda Siqueira on behalf of the Fiocruz COVID-19 Genomic Surveillance Network; Paola Resende; Renata Serrano Lopes; Taina Venas                                                                                                                                                                                                                                                                                                                                                                                                                                                                                                    |
| EPI_ISL_792519                                                                                                                                                                                                                                                                                                                                                                       | Laboratorio Central de la Ciudad de Santa Fe                                                                                                           | Grupo de Genómica y Bioinformática del Instituto de Investigación de la Cadena Láctea CONICET-INTA on behalf of 'Proyecto Argentino Interinstitucional de genómica de SARS-CoV-2' (PAIS Consortium)                                                            | AF; Amadio; C; Eberhardt; G; Irazoqui; JM; MF; Mugna; Ojeda; Pastor; Rompató; V                                                                                                                                                                                                                                                                                                                                                                                                                                                                                                                                                                                                                                                                                                       |
| EPI_ISL_2271696                                                                                                                                                                                                                                                                                                                                                                      | Laboratorio Central, Ministerio de Salud Cordoba                                                                                                       | Instituto de Patología Vegetal (CIAP-INTA) on behalf of 'Proyecto Argentino Interinstitucional de genómica de SARS-CoV-2' (PAIS Consortium)                                                                                                                    | Barbas, G.; Castro, G.; Debat, HJ.; FD; Fernandez; M; M.B.; Marquez, N.; Pisano; Re, V.                                                                                                                                                                                                                                                                                                                                                                                                                                                                                                                                                                                                                                                                                               |
| EPI_ISL_792539, EPI_ISL_2940267, EPI_ISL_2940286                                                                                                                                                                                                                                                                                                                                     | Laboratorio Central, Ministerio de Salud Córdoba                                                                                                       | Instituto de Patología Vegetal (CIAP-INTA) on behalf of 'Proyecto Argentino Interinstitucional de genómica de SARS-CoV-2' (PAIS Consortium)                                                                                                                    | Barbas, G.; Castro, G.; Debat, HJ.; FD; Fernández; M; M.B.; MB; Marquez, N.; Pisano; Re; Re, V.; V                                                                                                                                                                                                                                                                                                                                                                                                                                                                                                                                                                                                                                                                                    |
| EPI_ISL_424667                                                                                                                                                                                                                                                                                                                                                                       | Laboratorio Estatal de Salud Publica del Estado de México                                                                                              | Instituto de Diagnóstico y Referencia Epidemiológicos                                                                                                                                                                                                          | Adnan Araiza Rodríguez; Alejandro Sánchez; Alfredo Ponce de León Garduño; Blanca Taboada; Carlos F. Arias.; Carolina González Torres; Celia Boukadida; Cesar Raúl González Bonilla; Concepción Grajales Muñoz; Edgar Mendieta Condado; Eduardo Becerri Vargas; Fabiola Garcés Ayala; Fernando Ledesma Barrientos; Francisco Javier Gaytán Cervantes; Francisco Pulido; Gisela Barrera Badillo; Gloria Vázquez; Guillermo M. Ruiz-Palacios; Irma López Martínez; Joel Armando Vázquez Pérez; José Arturo Martínez Orozco; José Ernesto Ramírez González; José Esteban Muñoz Medina; Lucia Hernández Rivas; Luis Alberto García Andrade; Mario Mújica Sánchez; Pavel Isa; Pilar Ramos Cervantes; Ricardo Grande; Santiago Avila Ríos; Víctor Hugo Borja Aburto; Violeta Ibarra González |
| EPI_ISL_779189, EPI_ISL_779196                                                                                                                                                                                                                                                                                                                                                       | Laboratorio Estatal de Salud Pública de Nuevo León                                                                                                     | Laboratorio de Infectología Molecular, Departamento de Bioquímica y Medicina Molecular, Facultad de Medicina - Universidad Autónoma de Nuevo León                                                                                                              | Ana M. Rivas-Estilla; Consuelo Treviño-Garza; Daniel Arellanos-Soto; Elise del Carmen García-García; Gloria A. Jasso-de-la-Peña; Kame A. Galán-Huerta; Manuel E. de-la-O-Cavazos; María F. Herrera-Saldivar; Natalia Martínez-Acuña; Roberto Montes-de-Oca; Samuel Buentello-Wong; Sonia A. Lozano-Sepúlveda                                                                                                                                                                                                                                                                                                                                                                                                                                                                          |
| EPI_ISL_2825105, EPI_ISL_2825117, EPI_ISL_2825135, EPI_ISL_2826967, EPI_ISL_2826996, EPI_ISL_2827807, EPI_ISL_2827824, EPI_ISL_2827828, EPI_ISL_2827835, EPI_ISL_2827848                                                                                                                                                                                                             | see above<br>Laboratorio Nacional de Salud                                                                                                             | Laboratorio Nacional de Salud                                                                                                                                                                                                                                  | Gabriela García; Linda Mendoza                                                                                                                                                                                                                                                                                                                                                                                                                                                                                                                                                                                                                                                                                                                                                        |
| EPI_ISL_837551, EPI_ISL_837579, EPI_ISL_837589                                                                                                                                                                                                                                                                                                                                       | Laboratorio Nacional de Salud                                                                                                                          | Laboratory of Respiratory Viruses and Measles, Oswaldo Cruz Institute, FIOCRUZ                                                                                                                                                                                 | Ana Carolina Mendonca; Anna Carolina Paixao; Cesar Roberto Conde Pereira; Claudia Estrada; Fernando Motta; Luciana Appolinario; Marilda Siqueira on behalf of the Fiocruz COVID-19 Genomic Surveillance Network; Paola Resende                                                                                                                                                                                                                                                                                                                                                                                                                                                                                                                                                        |
| EPI_ISL_2274010, EPI_ISL_3045384, EPI_ISL_3045410, EPI_ISL_3045422                                                                                                                                                                                                                                                                                                                   | Laboratorio Nacional de Salud Pública Dr. Defilló - LNSPDD                                                                                             | Laboratory of Respiratory Viruses and Measles, Oswaldo Cruz Institute, FIOCRUZ                                                                                                                                                                                 | Alice Sampaio Rocha; Ana Carolina Mendonca; Anna Carolina Paixao; Elisa Cavalcante Pereira; Fernando Motta; Grey Benoit Vasquez; Isaac Miquel Sanchez; Ivonne Imbert; Lucia de la Cruz; Luciana Appolinario; Marilda Siqueira on behalf of the Fiocruz COVID-19 Genomic Surveillance Network; Nurys de Castro; Paola Resende; Renata Serrano Lopes; Ronald Skewes; Taina Venas                                                                                                                                                                                                                                                                                                                                                                                                        |
| EPI_ISL_2648244, EPI_ISL_2648250, EPI_ISL_2648251, EPI_ISL_2648252, EPI_ISL_2648256, EPI_ISL_2648260, EPI_ISL_2650523, EPI_ISL_2650524, EPI_ISL_2650529, EPI_ISL_2650533, EPI_ISL_2650534, EPI_ISL_2650535, EPI_ISL_2650537                                                                                                                                                          | see above<br>Laboratorio Nacional de Vigilancia de la Salud - Sección de Virología                                                                     | Genomics and Proteomics Department, Gorgas Memorial Institute For Health Studies                                                                                                                                                                               | Alexander Martinez; Ambar Moreno; Claudia Díaz; Claudia Gonzalez; Elda Martínez; Jessica Gondola; Leyda Abrego; Marlene Castillo; Mitzi Castro; Nelly Amador; Oris Chavarria; Sandra Paola Paz; Sofia Carolina Alvarado                                                                                                                                                                                                                                                                                                                                                                                                                                                                                                                                                               |
| EPI_ISL_1091264                                                                                                                                                                                                                                                                                                                                                                      | Laboratorio PGM                                                                                                                                        | Laboratorio de Infectología Molecular, Departamento de Bioquímica y Medicina Molecular, Facultad de Medicina - Universidad Autónoma de Nuevo León                                                                                                              | Ana M. Rivas-Estilla; Daniel Arellanos-Soto; Eduardo Garza-de-la-Peña; Gabriela Elizondo; Javier Ramos-Jimenez; Kame A. Galán-Huerta; María F. Herrera-Saldivar; Natalia Martínez-Acuña; Sonia A. Lozano-Sepúlveda                                                                                                                                                                                                                                                                                                                                                                                                                                                                                                                                                                    |
| EPI_ISL_1396389                                                                                                                                                                                                                                                                                                                                                                      | Laboratorio Salud Publica Mendoza                                                                                                                      | Nodo de Secuenciación Tierra del Fuego - Hospital Regional Ushuaia - Centro Austral De Investigaciones Cientificas - Universidad Nacional De Tierra Del Fuego on behalf of 'Proyecto Argentino Interinstitucional de genómica de SARS-CoV-2' (PAIS Consortium) | Aguirre Carolina; Alberto Carena; Alejandro Ezequiel Rojas; Andrea Falaschi; Belén Ortiz; Bosio Lia; Carlos Espul; Cristian Garay; Cristina Fernanda Nardi; Fernando Gallego; Fernando Giuliani; Ivan Dario Gramundi; Luciana Martinez; Maria Belen Peralta Roca; Patricia Robledo; Santiago Guillermo Ceballos; Silvia Zerrer; Silvina Denita                                                                                                                                                                                                                                                                                                                                                                                                                                        |
| EPI_ISL_2462063                                                                                                                                                                                                                                                                                                                                                                      | Laboratorio de Biología Molecular, Hospital San Pedro Claver                                                                                           | Microbiología Molecular, Instituto SELADIS, Universidad Mayor de San Andrés                                                                                                                                                                                    | Aneth Vasquez Michel; Carmen Delgado Barrera; Oscar M. Rollano-Peñaloza; Sandra Miranda Sardon                                                                                                                                                                                                                                                                                                                                                                                                                                                                                                                                                                                                                                                                                        |
| EPI_ISL_2600378                                                                                                                                                                                                                                                                                                                                                                      | Laboratorio de Biología Molecular, Hospital San Pedro Claver                                                                                           | Molecular Genetics Laboratory, Instituto de Investigaciones Químicas, Universidad Mayor de San Andrés                                                                                                                                                          | Aneth Vasquez Michel; Carmen Delgado Barrera; Oscar M. Rollano-Peñaloza; Sandra Miranda Sardon                                                                                                                                                                                                                                                                                                                                                                                                                                                                                                                                                                                                                                                                                        |
| EPI_ISL_1278284                                                                                                                                                                                                                                                                                                                                                                      | Laboratorio de Biología Molecular, SEDES-Potosi                                                                                                        | Molecular Genetics Laboratory, Instituto de Investigaciones Químicas, Universidad Mayor de San Andrés                                                                                                                                                          | Aneth Vasquez Michel; Oscar M. Rollano-Peñaloza                                                                                                                                                                                                                                                                                                                                                                                                                                                                                                                                                                                                                                                                                                                                       |
| EPI_ISL_457941, EPI_ISL_457956, EPI_ISL_457965                                                                                                                                                                                                                                                                                                                                       | Laboratorio de Biología Molecular Asociación Española Primera en Salud                                                                                 | Departments of Pathology and Medicine, New York University School of Medicine                                                                                                                                                                                  | Adriana Heguy; Christian Marier; Gael Westby; Gonzalo Manrique; Maria Noel Zubillaga; Maria Victoria Elizondo; Matthew T Mauroano; Paul Zappile                                                                                                                                                                                                                                                                                                                                                                                                                                                                                                                                                                                                                                       |
| EPI_ISL_2427504, EPI_ISL_2427581, EPI_ISL_2427601, EPI_ISL_2427614, EPI_ISL_2427669, EPI_ISL_2427683, EPI_ISL_2427694, EPI_ISL_2427702, EPI_ISL_2427705, EPI_ISL_2427711, EPI_ISL_2427714, EPI_ISL_2427724, EPI_ISL_2427733, EPI_ISL_2427751, EPI_ISL_2427752, EPI_ISL_2427768, EPI_ISL_2427769, EPI_ISL_2427770, EPI_ISL_2427772, EPI_ISL_2427774, EPI_ISL_2427775, EPI_ISL_2427779 | see above<br>Laboratorio de Biología Molecular Médica Uruguaya                                                                                         | Departments of Pathology and Medicine, New York University School of Medicine                                                                                                                                                                                  | Adriana Heguy; Cecilia Sorhouet; Christian Marier; Dacia Dimartino; Gonzalo Manrique; Maria Cristina Mogdasy; Maria Noel Zubillaga; Maria Victoria Elizondo; Paul Zappile                                                                                                                                                                                                                                                                                                                                                                                                                                                                                                                                                                                                             |
| EPI_ISL_626549                                                                                                                                                                                                                                                                                                                                                                       | Laboratorio de Biología Molecular, Facultad de Medicina, Universidad de Atacama, Copiapo, Chile/ FONDAP CRG, Universidad Andrés Bello, Santiago, Chile | Center for Mathematical Modeling and Center for Genome Regulation. Santiago, Chile                                                                                                                                                                             | Allende ML; Bastias M; Castro E; Echeverría C; González M; M; Maass A; Manríquez R; Meneses C.; Montecino; Orellana A; Sanhueza D; Travisany D                                                                                                                                                                                                                                                                                                                                                                                                                                                                                                                                                                                                                                        |
| EPI_ISL_1068097                                                                                                                                                                                                                                                                                                                                                                      | Laboratorio de Ecología de Doenças Transmissíveis na Amazonia, Instituto Leonidas e Maria Deane - Fiocruz Amazonia                                     | Laboratorio de Ecología de Doenças Transmissíveis na Amazonia, Instituto Leonidas e Maria Deane - Fiocruz Amazonia                                                                                                                                             | André Corado; Debora Duarte; Felipe Naveca on behalf of the Fiocruz COVID-19 Genomic Surveillance Network; Fernanda Nascimento; George Silva; Karina Pessoa; Luciana Gonçalves; Maria Júlia Brandão; Matilde Mejia; Michele Jesus; Valdinete Nascimento; Victor Souza; Ágatha Costa                                                                                                                                                                                                                                                                                                                                                                                                                                                                                                   |
| EPI_ISL_1629797                                                                                                                                                                                                                                                                                                                                                                      | Laboratorio de Genómica Microbiana, Universidad Peruana Cayetano Heredia                                                                               | Laboratorio de Genómica Microbiana, Universidad Peruana Cayetano Heredia                                                                                                                                                                                       | Alejandra Dávila-Barclay; Diego Cuicapuzá; Guillermo Salvatierra; Janet Huancachoque; Lenin Maturrano; Luis González; Pablo Tsukayama; Pedro E. Romero; Pool Marcos                                                                                                                                                                                                                                                                                                                                                                                                                                                                                                                                                                                                                   |
| EPI_ISL_779182, EPI_ISL_961785                                                                                                                                                                                                                                                                                                                                                       | Laboratorio de Infectología, Servicio de Infectología, Hospital Universitario Dr. José Eleuterio González - Universidad Autónoma de Nuevo León         | Laboratorio de Infectología Molecular, Departamento de Bioquímica y Medicina Molecular, Facultad de Medicina - Universidad Autónoma de Nuevo León                                                                                                              | Adrian Camacho-Ortiz; Ana M. Rivas-Estilla; Daniel Arellanos-Soto; Eduardo Perez-Alba; Elvira Garza-González; Kame A. Galán-Huerta; Laura Nuzzolo-Shihadeh; María F. Herrera-Saldivar; Natalia Martínez-Acuña; Paola Bocanegra-Ibarates; Samantha M. Flores-Treviño; Sonia A. Lozano-Sepúlveda                                                                                                                                                                                                                                                                                                                                                                                                                                                                                        |
| EPI_ISL_953404                                                                                                                                                                                                                                                                                                                                                                       | Laboratorio de Investigaciones de Baney                                                                                                                | "Swiss Tropical and Public Health Institute"                                                                                                                                                                                                                   | "Carlos Cortes; Bonifacio Manguire Nlavo; Claudia Daubenberger; Diosdado Odjama Nseng Ada; Elizabeth Nyakarungu; Guillermo Garcia; Maximilian Mpina; Mitoha Ondo O Ayekaba; Philip Wonder Phiri"; Salome Hosch; Tobias Schindler                                                                                                                                                                                                                                                                                                                                                                                                                                                                                                                                                      |
| EPI_ISL_1672556, EPI_ISL_2002672, EPI_ISL_2002686                                                                                                                                                                                                                                                                                                                                    | Laboratorio de Investigaciones de Baney                                                                                                                | Swiss Tropical and Public Health Institute                                                                                                                                                                                                                     | Bonifacio Manguire Nlavo; Carlos Cortes; Claudia Daubenberger; Diosdado Odjama Nseng Ada; Elizabeth Nyakarungu; Guillermo Garcia; Maximilian Mpina; Mitoha Ondo O Ayekaba; Philip Wonder Phiri; Philipp Wagner; Salome Hosch; Tobias Schindler; Yahya Maidane                                                                                                                                                                                                                                                                                                                                                                                                                                                                                                                         |
| EPI_ISL_648307, EPI_ISL_648318, EPI_ISL_648341, EPI_ISL_648350, EPI_ISL_648356, EPI_ISL_648372, EPI_ISL_648379, EPI_ISL_649171, EPI_ISL_649172                                                                                                                                                                                                                                       | see above<br>Laboratorio de Investigaciones de Baney                                                                                                   | University Hospital Basel, Clinical Bacteriology                                                                                                                                                                                                               | Adrian Egli; Alfredo Mari; Bonifacio Manguire Nlavo; Carlos Cortes; Claudia Daubenberger; Diosdado Odjama Nseng Ada; Elizabeth Nyakarungu; Guillermo Garcia; Helena Seth-Smith; Madlen Stange; Maximilian Mpina; Mitoha Ondo O Ayekaba; Philip Wonder Phiri; Salome Hosch; Tim Roloff; Tobias Schindler                                                                                                                                                                                                                                                                                                                                                                                                                                                                               |
| EPI_ISL_2854117, EPI_ISL_2854145                                                                                                                                                                                                                                                                                                                                                     | Laboratorio de Medicina Molecular, Universidad de Magallanes                                                                                           | Centro Asistencial Docente y de Investigación, Universidad de Magallanes                                                                                                                                                                                       | Constanza Ceroni; Diego Alvarez; Jacqueline Aldridge; Jorge González; Marcelo Navarrete; Roberto Uribe-Paredes                                                                                                                                                                                                                                                                                                                                                                                                                                                                                                                                                                                                                                                                        |
| EPI_ISL_2462066                                                                                                                                                                                                                                                                                                                                                                      | Laboratorio de Referencia Departamental en Inmunología, Sedes-Pando                                                                                    | Molecular Genetics Laboratory, Instituto de Investigaciones Químicas, Universidad Mayor de San Andrés                                                                                                                                                          | Aneth Vasquez Michel; Carmen Delgado Barrera; Oscar M. Rollano-Peñaloza; Sandra Miranda Sardon                                                                                                                                                                                                                                                                                                                                                                                                                                                                                                                                                                                                                                                                                        |
| EPI_ISL_524473                                                                                                                                                                                                                                                                                                                                                                       | Laboratorio de Referencia Nacional de Virus Respiratorio, Centro Nacional de Salud Publica, Instituto Nacional de Salud Peru.                          | Laboratorio de Referencia Nacional de Biotecnología y Biología Molecular, Centro Nacional de Salud Publica, Instituto Nacional de Salud Peru.                                                                                                                  | Carlos Padilla Rojas; Henri Bailon Calderon; Johanna Balbuena Torres; Karolyn Vega Chozo; Marco Galarza Perez; Maribel Huaranga Nuñez; Nancy Rojas Serrano.; Omar Caceres Rey; Priscila Lope Pari                                                                                                                                                                                                                                                                                                                                                                                                                                                                                                                                                                                     |
| EPI_ISL_1575438                                                                                                                                                                                                                                                                                                                                                                      | Laboratorio de Referencia Nacional de Virus Respiratorio, Instituto Nacional de Salud Peru                                                             | Laboratorio de Referencia Nacional de Biotecnología y Biología Molecular, Instituto Nacional de Salud Peru                                                                                                                                                     | Carlos Padilla Rojas; Henri Bailon Calderon; Johanna Balbuena Torres; Karolyn Vega Chozo; Luis Barcena; Marco Galarza Perez; Maribel Huaranga Nuñez; Nancy Rojas Serrano; Omar Caceres Rey; Priscila Lope Pari                                                                                                                                                                                                                                                                                                                                                                                                                                                                                                                                                                        |
| EPI_ISL_491429, EPI_ISL_1532220                                                                                                                                                                                                                                                                                                                                                      | Laboratorio de Referencia Nacional de Virus Respiratorio, Instituto Nacional de Salud Perú                                                             | Laboratorio de Referencia Nacional de Biotecnología y Biología Molecular, Instituto Nacional de Salud Perú                                                                                                                                                     | Carlos Padilla Rojas; Henri Bailon Calderon; Johanna Balbuena Torres; Karolyn Vega Chozo; Luis Barcena; Marco Galarza Perez; Maribel Huaranga Nuñez; Nancy Rojas Serrano; Omar Caceres Rey; Priscila Lope Pari                                                                                                                                                                                                                                                                                                                                                                                                                                                                                                                                                                        |
| EPI_ISL_1111143, EPI_ISL_1111223, EPI_ISL_1111249, EPI_ISL_1111480,                                                                                                                                                                                                                                                                                                                  | Laboratorio de Referencia Nacional de Virus Respiratorio, Instituto Nacional de Salud Perú                                                             | Laboratorio de Referencia Nacional de Enteropatógenos, Instituto Nacional de Salud del Perú                                                                                                                                                                    | Fiorella Orellana Peralta; Iris Silva Molina; Junior Caro Castro; Ronnie Gavilan Chavez; Veronica Hurtado Vela; Willi Quino Sifuentes                                                                                                                                                                                                                                                                                                                                                                                                                                                                                                                                                                                                                                                 |

|                                                                                                                                                                                                                                                                                                                                                                                                                                                                                                                                                                                 |                                                                                                                                                                                                                                                                                                                                                    |                                                                                                                                                                                                                                                                                                                                                                                                                                                                                                                                                                                                                                                                                                                                                                                                                                                                                                                                                                                                                                                                    |                                                                                                                                                                                                                                                                                                                                                                                                                                                                                                           |
|---------------------------------------------------------------------------------------------------------------------------------------------------------------------------------------------------------------------------------------------------------------------------------------------------------------------------------------------------------------------------------------------------------------------------------------------------------------------------------------------------------------------------------------------------------------------------------|----------------------------------------------------------------------------------------------------------------------------------------------------------------------------------------------------------------------------------------------------------------------------------------------------------------------------------------------------|--------------------------------------------------------------------------------------------------------------------------------------------------------------------------------------------------------------------------------------------------------------------------------------------------------------------------------------------------------------------------------------------------------------------------------------------------------------------------------------------------------------------------------------------------------------------------------------------------------------------------------------------------------------------------------------------------------------------------------------------------------------------------------------------------------------------------------------------------------------------------------------------------------------------------------------------------------------------------------------------------------------------------------------------------------------------|-----------------------------------------------------------------------------------------------------------------------------------------------------------------------------------------------------------------------------------------------------------------------------------------------------------------------------------------------------------------------------------------------------------------------------------------------------------------------------------------------------------|
| EPI_ISL_1111501<br>EPI_ISL_729872,<br>EPI_ISL_729879,<br>EPI_ISL_812456                                                                                                                                                                                                                                                                                                                                                                                                                                                                                                         | Laboratorio de Referencia Nacional de Virus Respiratorios, Instituto Nacional de Salud Peru                                                                                                                                                                                                                                                        | Laboratorio de Genómica Microbiana, Universidad Peruana Cayetano Heredia                                                                                                                                                                                                                                                                                                                                                                                                                                                                                                                                                                                                                                                                                                                                                                                                                                                                                                                                                                                           | Alejandra Dávila-Barclay; Brenda Ayzanoa; Camila Castillo-Vilcahumán; Guillermo Salvatierra; Janet Huancachoque; Luis González; Marco Galarza; Nancy Rojas; Oscar Escalante; Pablo Tsukayama; Pedro E. Romero; Pool Marcos; Priscila Lope                                                                                                                                                                                                                                                                 |
| EPI_ISL_2536706,<br>see above                                                                                                                                                                                                                                                                                                                                                                                                                                                                                                                                                   | EPI_ISL_2536739, EPI_ISL_2536758, EPI_ISL_2536790, EPI_ISL_2536791, EPI_ISL_2536794, EPI_ISL_2536840, EPI_ISL_2536845, EPI_ISL_2921339, EPI_ISL_2921345, EPI_ISL_2921359, EPI_ISL_2921372, EPI_ISL_2921373, EPI_ISL_2921385, EPI_ISL_2921427, EPI_ISL_2921474, EPI_ISL_3023412, EPI_ISL_3023495, EPI_ISL_3023554, EPI_ISL_3023587, EPI_ISL_3023618 | Laboratorio de Referencial Nacional de Virus Respiratorios                                                                                                                                                                                                                                                                                                                                                                                                                                                                                                                                                                                                                                                                                                                                                                                                                                                                                                                                                                                                         | Carlos Padilla Rojas; Henri Bailon Calderon; Iris Silva Molina; Joseph Huayra Niquen; Lely Solari Zerpa; Luis Barcena Flores; Marco Galarza Perez; Nancy Rojas Serrano; Omar Caceres Rey; Orson Mestanza Millones; Priscila Lope Pari; Sandra Morales Ruiz; Steve Acedo Lazo; Veronica Hurtado Vela                                                                                                                                                                                                       |
| EPI_ISL_1738785,<br>EPI_ISL_1738789                                                                                                                                                                                                                                                                                                                                                                                                                                                                                                                                             | Laboratorio de Salud Pública Bogota                                                                                                                                                                                                                                                                                                                | Gencore - Universidad de los Andes                                                                                                                                                                                                                                                                                                                                                                                                                                                                                                                                                                                                                                                                                                                                                                                                                                                                                                                                                                                                                                 | Alejandro Gomez; Ana María Palacio; David Gonzalez; Gabriela Delgado; Johana Hernandez; Luisa Sacristan; Marcela Guevara; Silvia Restrepo                                                                                                                                                                                                                                                                                                                                                                 |
| EPI_ISL_717827                                                                                                                                                                                                                                                                                                                                                                                                                                                                                                                                                                  | Laboratorio de Virologia Molecular / UFRJ                                                                                                                                                                                                                                                                                                          | Bioinformatics Laboratory / LNCC                                                                                                                                                                                                                                                                                                                                                                                                                                                                                                                                                                                                                                                                                                                                                                                                                                                                                                                                                                                                                                   | Alexandra L Gerber; Amilcar Tanuri; Ana Paula de C Guimarães; Ana Tereza R de Vasconcelos; Andréa Cony Cavalcanti; Carolina M Voloch; Claudia dos Santos Rodrigues; Cynthia C Cardoso; Diana Mariani; Luiz G P de Almeida; Otavio Bustrolini; Ronaldo da Silva F Jr; Terezinha M P P Castiñeira                                                                                                                                                                                                           |
| EPI_ISL_792399                                                                                                                                                                                                                                                                                                                                                                                                                                                                                                                                                                  | Laboratorio de Virología del Hospital de Niños Dr. Ricardo Gutiérrez                                                                                                                                                                                                                                                                               | Biocódices SA. on behalf of 'Proyecto Argentino Interinstitucional de genómica de SARS-CoV-2' (PAIS Consortium)                                                                                                                                                                                                                                                                                                                                                                                                                                                                                                                                                                                                                                                                                                                                                                                                                                                                                                                                                    | Acevedo; Alexay; Alvarez Lopez; Berros JM; C; Dopazo H; E; Gravis; Jacques; ME; Mistchenko; O; S; Zubrzycki J                                                                                                                                                                                                                                                                                                                                                                                             |
| EPI_ISL_1396198,<br>EPI_ISL_1396199,<br>EPI_ISL_2007487                                                                                                                                                                                                                                                                                                                                                                                                                                                                                                                         | Laboratorio de Virología del Hospital de Niños Dr. Ricardo Gutiérrez                                                                                                                                                                                                                                                                               | Área de Secuenciación del Laboratorio de Virología del Hospital de Niños Dr. Ricardo Gutiérrez on behalf of 'Proyecto Argentino Interinstitucional de genómica de SARS-CoV-2' (PAIS Consortium)                                                                                                                                                                                                                                                                                                                                                                                                                                                                                                                                                                                                                                                                                                                                                                                                                                                                    | A; Acevedo; Acuña; Alexay; Alvarez Lopez; Barreda Frank; C; D; E; G; Goya; Grandis; Jacques; LE; Labarta; Lusso; M; ME; MI; Medina; Mistchenko; N; Nabae; Jodar; Natale; O; S; Streitenberger; Thomas; Valinotto; Viegas, M.; Villegas                                                                                                                                                                                                                                                                    |
| EPI_ISL_1760549<br>EPI_ISL_1239601                                                                                                                                                                                                                                                                                                                                                                                                                                                                                                                                              | Laboratorio di Microbiologia<br>Laboratorium Badawczo-Rozwojowe Vitagenum                                                                                                                                                                                                                                                                          | Laboratorio di Microbiologia<br>1. National Institute of Public Health - National Institute of Hygiene; 2. Eurofins Genomics Europe Sequencing GmbH                                                                                                                                                                                                                                                                                                                                                                                                                                                                                                                                                                                                                                                                                                                                                                                                                                                                                                                | Martinetti Lucchini Gladys; Valeria Spina<br>ECDC COVID-19 WGS support team; Eurofins Genomics Europe Sequencing Team; Gierczyński Rafał; Sadkowska-Todys Małgorzata; Wolkowicz Tomasz; Zacharczuk Katarzyna                                                                                                                                                                                                                                                                                              |
| EPI_ISL_882960                                                                                                                                                                                                                                                                                                                                                                                                                                                                                                                                                                  | Laboratorium Diagnostyki Mikrobiologicznej z Pracownią Prątką Gruźlicy SPSZw im. Jana Bożego w Lublinie                                                                                                                                                                                                                                            | National Institute of Public Health - National Institute of Hygiene                                                                                                                                                                                                                                                                                                                                                                                                                                                                                                                                                                                                                                                                                                                                                                                                                                                                                                                                                                                                | Gawor Jan; Wolkowicz Tomasz; Zacharczuk Katarzyna                                                                                                                                                                                                                                                                                                                                                                                                                                                         |
| EPI_ISL_1891882                                                                                                                                                                                                                                                                                                                                                                                                                                                                                                                                                                 | Laboratorium Mikrobiologiczne Doiñoślaskie Centrum Transplantacji Komórkowych z Krajowym Bankiem Dawców Szpiku                                                                                                                                                                                                                                     | 1. Academic Center for Pathomorphological and Genetic-Molecular Diagnostics ltd, Białystok, Poland 2. National Institute of Public Health - National Institute of Hygiene, Warsaw, Poland                                                                                                                                                                                                                                                                                                                                                                                                                                                                                                                                                                                                                                                                                                                                                                                                                                                                          | Anetta Sulewska; Jacek Nikieliński; Janusz Dzięciol; Joanna Kiśluk; Katarzyna Zacharczuk; Konrad Raczkowski; Magdalena Nowakowska; Małgorzata Sadkowska-Todys; Piotr Karabowicz; Piotr Majewski; Przemysław Bieчек. Joanna Reszeć; Radosław Charkiewicz; Tomasz Wolkowicz                                                                                                                                                                                                                                 |
| EPI_ISL_1612196, EPI_ISL_1681431, EPI_ISL_1681649, EPI_ISL_1681687, EPI_ISL_1685076, EPI_ISL_1799239, EPI_ISL_1800114, EPI_ISL_1802363, EPI_ISL_1802595, EPI_ISL_1926483, EPI_ISL_1928869, EPI_ISL_1931457, EPI_ISL_1931706, EPI_ISL_2045663, EPI_ISL_2184581, EPI_ISL_2305197, EPI_ISL_2305215, EPI_ISL_2305316, EPI_ISL_2305435, EPI_ISL_2305757, EPI_ISL_2306269, EPI_ISL_2398872, EPI_ISL_2398939, EPI_ISL_2480633, EPI_ISL_2481359, EPI_ISL_2481449, EPI_ISL_2481857, EPI_ISL_2611208, EPI_ISL_2611644, EPI_ISL_2872882, EPI_ISL_2872931, EPI_ISL_2927056, EPI_ISL_3017270 | Centers for Disease Control and Prevention Division of Viral Diseases, Pathogen Discovery                                                                                                                                                                                                                                                          | Adrian Paskey; Amanda Douglas; Amanda Suchanek; Andrea Throop; Ayla Burns; Benjamin Rambo-Martin; Bobbi Croy; Brian Krueger; Brian Norvell; Christopher Gulvick; Christos Petropoulos; Clinton R. Paden; Craig Lukasik; Dakota Howard; Darlene Wagner; Debbie Boles; Dhvani Batra; Duncan MacCannell; Eyad Almasri; Goran Stevanovic; Howard Engler; Hrushikesh Deshmukh; Jake Humphrey; Jana Schroth; Jason Caravas; Joe Voshell; John Pruitt; Jonathan Williams; Kara Moser; Kimberly Wagner; Lax Iyer; Lisa Pfefferle; Lyndon Tilson; Manoj Jain; Marcia Eisenberg; Mary Ann Cristobal; Mary Williamson; Matthew Robinson; Matthew Schmerer; Michael Levandoski; Mike Sapeta; Mindy Nye; Minoor Agarwal; Mohan Kolli; Nuthawin Charoensri; Oren Cohen; Peter W. Cook; Prashant Gupta; Qian Zeng; Rama Ghanti; Scott Parker; Scott Ryan; Scott Sammons; Shatavia Morrison; Stanley Letovsky; Steven Ragan; Suresh Babu Selvaraju; Susan Countryman; Susan Hicks; Suzanne Dale; Thomas Urban; Tim Kuphal; Tricia Zwiefelhofer; Vincent Drouillon; Yvette Unoaumhi |                                                                                                                                                                                                                                                                                                                                                                                                                                                                                                           |
| EPI_ISL_1021332,<br>EPI_ISL_1026027,<br>EPI_ISL_1029613                                                                                                                                                                                                                                                                                                                                                                                                                                                                                                                         | Laboratory Corporation of America                                                                                                                                                                                                                                                                                                                  | Respiratory Viruses Branch, Division of Viral Diseases, Centers for Disease Control and Prevention                                                                                                                                                                                                                                                                                                                                                                                                                                                                                                                                                                                                                                                                                                                                                                                                                                                                                                                                                                 | Ben L. Rambo-Martin; Clinton R. Paden; Dakota Howard; Dhvani Batra; Duncan MacCannell; Peter W. Cook; Suxiang Tong                                                                                                                                                                                                                                                                                                                                                                                        |
| EPI_ISL_582530,<br>EPI_ISL_3102050                                                                                                                                                                                                                                                                                                                                                                                                                                                                                                                                              | Laboratory Diagnostic, Veterinary Specialized Institute Kraljevo                                                                                                                                                                                                                                                                                   | Laboratory Diagnostic, Veterinary Specialized Institute Kraljevo                                                                                                                                                                                                                                                                                                                                                                                                                                                                                                                                                                                                                                                                                                                                                                                                                                                                                                                                                                                                   | Afonso, C.; Banovic Djeri, B.; Djukic, V.; Jankovic, M.; Jovanovic, T.; Knezevic, A.; Petrovic, T.; Sekler, M.; Tesovic, B.; Vidanovic, D.; Volkening, J.                                                                                                                                                                                                                                                                                                                                                 |
| EPI_ISL_754904,<br>EPI_ISL_754906                                                                                                                                                                                                                                                                                                                                                                                                                                                                                                                                               | Laboratory Diagnostics and Clinical Immunology of Developmental Age, Medical University of Warsaw                                                                                                                                                                                                                                                  | genXone SA, Research & Development Laboratory; The Faculty of Mathematics, Informatics and Mechanics of the University of Warsaw                                                                                                                                                                                                                                                                                                                                                                                                                                                                                                                                                                                                                                                                                                                                                                                                                                                                                                                                   | Anna Gambin; Grzegorz Nowicki; Jakub Grabowski; Maciej Sykulski; Michał Kaszuba; Monika Mańkowska-Woźniak; Natalia Drwęska-Matelska; Urszula Demkow; Lukasz Krych                                                                                                                                                                                                                                                                                                                                         |
| EPI_ISL_667809                                                                                                                                                                                                                                                                                                                                                                                                                                                                                                                                                                  | Laboratory Medicine                                                                                                                                                                                                                                                                                                                                | Department of Laboratory Medicine, Lin-Kou Chang Gung Memorial Hospital, Taoyuan, Taiwan                                                                                                                                                                                                                                                                                                                                                                                                                                                                                                                                                                                                                                                                                                                                                                                                                                                                                                                                                                           | Cheng-Hsun Chiu; Cheng-Ta Yang; Chung-Guei Huang; Guang-Wu Chen; Kuo-Chien Tsao; Kuo-Ming Lee; Mei-Jen Hsiao; Peng-Nien Huang; Po-Wei Huang; Shin-Ru Shih; Shu-Li Yang; Yi-Chun Liu; Yu-Nong Gong                                                                                                                                                                                                                                                                                                         |
| EPI_ISL_2467938                                                                                                                                                                                                                                                                                                                                                                                                                                                                                                                                                                 | Laboratory for HIV and opportunistic infections diagnosis The Republican Research and Practical Center for Epidemiology and Microbiology (RRPCEM)                                                                                                                                                                                                  | Laboratory for HIV and opportunistic infections diagnosis The Republican Research and Practical Center for Epidemiology and Microbiology (RRPCEM)                                                                                                                                                                                                                                                                                                                                                                                                                                                                                                                                                                                                                                                                                                                                                                                                                                                                                                                  | Alina Drozd; Artur Akhremchuk; Elena Gasich; Hanna Gudel; Katsiaryna Belyakova; Kirill Bulda; Leonid Valentovich; Nastassia Kabankova                                                                                                                                                                                                                                                                                                                                                                     |
| EPI_ISL_933533,<br>EPI_ISL_1138899,<br>EPI_ISL_1653933,<br>EPI_ISL_2080973                                                                                                                                                                                                                                                                                                                                                                                                                                                                                                      | Laboratory for HIV and opportunistic infections diagnosis The Republican Research and Practical Center for Epidemiology and Microbiology (RRPCEM)                                                                                                                                                                                                  | Laboratory for HIV and opportunistic infections diagnosis The Republican Research and Practical Center for Epidemiology and Microbiology (RRPCEM)                                                                                                                                                                                                                                                                                                                                                                                                                                                                                                                                                                                                                                                                                                                                                                                                                                                                                                                  | Alena Mikhaleuka; Alexander Kilchevcky; Alina Drozd; Anatoly Krasko; Anna Gudel; Artur Akhremchuk; Elena Gasich; Katsiaryna Belyakova; Kirill Bulda; Leonid Valentovich; Leonid Valentovich; Nastassia Kabankova; Vladimir Gorbunov; Yauhen Syalsiatin                                                                                                                                                                                                                                                    |
| EPI_ISL_471421                                                                                                                                                                                                                                                                                                                                                                                                                                                                                                                                                                  | Laboratory for Respiratory Viruses, National Influenza Centre, Cantacuzino National Military-Medical Institute for Research and Development                                                                                                                                                                                                        | Cantacuzino Institute                                                                                                                                                                                                                                                                                                                                                                                                                                                                                                                                                                                                                                                                                                                                                                                                                                                                                                                                                                                                                                              | Luiza Ustea; Mihaela Lazar; Nicoleta Paraschiv; Tim Durfee                                                                                                                                                                                                                                                                                                                                                                                                                                                |
| EPI_ISL_435045<br>EPI_ISL_2832105,<br>EPI_ISL_2832106                                                                                                                                                                                                                                                                                                                                                                                                                                                                                                                           | Laboratory of Applied Genetics<br>Laboratory of Genetics and Personalized Medicine, Zan Mitrev Clinic                                                                                                                                                                                                                                              | RSE "National Center for Biotechnology"<br>Laboratory of Genetics and Personalized Medicine, Zan Mitrev Clinic                                                                                                                                                                                                                                                                                                                                                                                                                                                                                                                                                                                                                                                                                                                                                                                                                                                                                                                                                     | Alexandr Shevtsov; Asylulan Amirgazin; Ilyas Akhmetollayev; Ruslan Kalendar; Viktoriya Lutsay; Yerlan Ramanculov Kungulovskii G. et al.                                                                                                                                                                                                                                                                                                                                                                   |
| EPI_ISL_2349110                                                                                                                                                                                                                                                                                                                                                                                                                                                                                                                                                                 | Laboratory of Immunohematology, Division of Hematology                                                                                                                                                                                                                                                                                             | Greek Genome Center, Biomedical Research Foundation of the Academy of Athens (BRFAA)                                                                                                                                                                                                                                                                                                                                                                                                                                                                                                                                                                                                                                                                                                                                                                                                                                                                                                                                                                               | Athanasia Mouzaki; Dimitrios Thanos; Emmanouil Athanasiadis; Giannis Vatsellas; Katerina Zoi; Theodoros Loupis                                                                                                                                                                                                                                                                                                                                                                                            |
| EPI_ISL_2312569,<br>EPI_ISL_2344050,<br>EPI_ISL_2344165                                                                                                                                                                                                                                                                                                                                                                                                                                                                                                                         | Laboratory of Immunohematology, Division of Hematology                                                                                                                                                                                                                                                                                             | Greek Genome Center, Biomedical Research Foundation of the Academy of Athens (BRFAA)                                                                                                                                                                                                                                                                                                                                                                                                                                                                                                                                                                                                                                                                                                                                                                                                                                                                                                                                                                               | Athanasia Mouzaki; Dimitrios Thanos; Emmanouil Athanasiadis; Giannis Vatsellas; Katerina Zoi; Theodoros Loupis                                                                                                                                                                                                                                                                                                                                                                                            |
| EPI_ISL_434456,<br>EPI_ISL_437895                                                                                                                                                                                                                                                                                                                                                                                                                                                                                                                                               | Laboratory of Microbiology, Medical School, National and Kapodistrian University of Athens                                                                                                                                                                                                                                                         | Laboratory of Biology, Department of Medicine, Democritus University of Thrace                                                                                                                                                                                                                                                                                                                                                                                                                                                                                                                                                                                                                                                                                                                                                                                                                                                                                                                                                                                     | Bampali, M.; Dovrolis, N.; Froukala, E.; Gatzidou, E.; Kassela K.; N. and Karakasioti, I.; Spanakis; Stavropoulou, A.; Tsakris, A.; Velezta, S.                                                                                                                                                                                                                                                                                                                                                           |
| EPI_ISL_6540116,<br>EPI_ISL_6540117,<br>EPI_ISL_2896981                                                                                                                                                                                                                                                                                                                                                                                                                                                                                                                         | Laboratory of Microbiology, National Reference Lab, Charles Nicolle Hospital; 2-University of Tunis ElManar, Faculty of Medicine of Tunis, LR99E509, Tunis, Tunisia                                                                                                                                                                                | 1-Clinical and Experimental Pharmacology Lab, LR16SP02, National Center of Pharmacovigilance, University of Tunis El Manar, Tunis, Tunisia. 2-Neurodegenerative diseases and psychiatric troubles, LR18SP03, Razi Hospital, University of Tunis El Manar, Tunis, Tunisia. 3- Ministry of Health, National Observatory of New and Emerging Diseases, 1006, Tunis, Tunisia                                                                                                                                                                                                                                                                                                                                                                                                                                                                                                                                                                                                                                                                                           | Alia Ben Kahla; Alia Benkahla; Emma Gaies; Gaies Emna; Ilhem Boutiba-Ben Boubaker; Ilhem Boutiba-Ben Boubaker.; Imen Kacem; Imen Mkada; Ines Mdingi; Jaïlia Ben Khellil; Maher Kharrat; Mouna Ben Sassi; Mouna Safer; Nissaf Ben Alaya; Riadh Daghfous; Riadh Gouider.; Roua Ben Othman; Salma Abid; Sameh Trabelsi; Sana Ferjani; Sarra Chamman; Soumaya Rammeh                                                                                                                                          |
| EPI_ISL_8031119,<br>EPI_ISL_2153433,<br>EPI_ISL_2154331                                                                                                                                                                                                                                                                                                                                                                                                                                                                                                                         | Laboratory of Microbiology, National Reference Lab, Charles Nicolle Hospital; 2-University of Tunis ElManar, Faculty of Medicine of Tunis, LR99E509, Tunis, Tunisia                                                                                                                                                                                | Clinical and Experimental Pharmacology Lab, LR16SP02, National Center of Pharmacovigilance, University of Tunis El Manar, Tunis, Tunisia. 2-Neurodegenerative diseases and psychiatric troubles, LR18SP03, Razi Hospital, University of Tunis El Manar, Tunis, Tunisia. 3- Ministry of Health, National Observatory of New and Emerging Diseases, 1006, Tunis, Tunisia                                                                                                                                                                                                                                                                                                                                                                                                                                                                                                                                                                                                                                                                                             | Ahmed Fakhfakh; Alia BenKahla; Gaies Emna; Habiba Ben Romdhane; Hanen El Jebari; Ilhem Boutiba-Ben Boubaker; Ilhem Boutiba-Ben Boubaker.; Imen Kacem; Imen Mdingi; Jaïlia Ben Khellil; Maher Kharrat; Manel Ben Sassi; Mouna Ben Sassi; Mouna Safer; Nissaf Ben Alaya; Raja Mahfoudhi; Riadh Daghfous; Riadh Gouider; Riadh Gouider.; Roua Ben Othman; Salma Abid; Sameh Trabelsi; Sana Ferjani; Sarra Chamman; Souissi Amira; Taha Maatoug; Zaineb Hamzaoui                                              |
| EPI_ISL_2893208, EPI_ISL_2893213, EPI_ISL_2893214, EPI_ISL_2893217, EPI_ISL_2893218, EPI_ISL_2893219, EPI_ISL_2893220                                                                                                                                                                                                                                                                                                                                                                                                                                                           | see above                                                                                                                                                                                                                                                                                                                                          | Laboratory of Molecular Biology and Cancer Immunology, Faculty of Sciences, Lebanese University                                                                                                                                                                                                                                                                                                                                                                                                                                                                                                                                                                                                                                                                                                                                                                                                                                                                                                                                                                    | Microbial Pathogenomics Lab - LAU<br>Bassam Badran; Fadi Abdel Sater; Georgi Merhi; Hamad Hassan; Ja'd Koweyes; Rawan Makki; Sima tokajian                                                                                                                                                                                                                                                                                                                                                                |
| EPI_ISL_450746                                                                                                                                                                                                                                                                                                                                                                                                                                                                                                                                                                  | Laboratory of Molecular Biology, Diagnostyka sp. z o.o.                                                                                                                                                                                                                                                                                            | Laboratory of Recombinant Vaccines                                                                                                                                                                                                                                                                                                                                                                                                                                                                                                                                                                                                                                                                                                                                                                                                                                                                                                                                                                                                                                 | Anna Piotrowska-Mietelska; Boguslaw Szewczyk; Krystyna Bienkowska-Szewczyk; Lukasz Rabalski; Maciej Kosinski                                                                                                                                                                                                                                                                                                                                                                                              |
| EPI_ISL_2301773,<br>EPI_ISL_2301776,<br>EPI_ISL_2312615                                                                                                                                                                                                                                                                                                                                                                                                                                                                                                                         | Laboratory of Molecular Biology, Mamatsio General Hospital of Kozani                                                                                                                                                                                                                                                                               | Greek Genome Center, Biomedical Research Foundation of the Academy of Athens (BRFAA)                                                                                                                                                                                                                                                                                                                                                                                                                                                                                                                                                                                                                                                                                                                                                                                                                                                                                                                                                                               | Dimitrios Thanos; Emmanouil Athanasiadis; Giannis Vatsellas; Katerina Zoi; Konstantina Gartzonika; Theodoros Loupis                                                                                                                                                                                                                                                                                                                                                                                       |
| EPI_ISL_801607,<br>EPI_ISL_801609                                                                                                                                                                                                                                                                                                                                                                                                                                                                                                                                               | Laboratory of Molecular Virology, Pontificia Universidad Católica de Chile                                                                                                                                                                                                                                                                         | MSHS Pathogen Surveillance Program                                                                                                                                                                                                                                                                                                                                                                                                                                                                                                                                                                                                                                                                                                                                                                                                                                                                                                                                                                                                                                 | Adolfo Garcia-Sastre; Adriana van De Guchte; Ajay Obla; Ana Maria Contreras; Ana S. Gonzalez-Reiche; Bremy Alburquerque; Carlos Palma; Constanza Maldonado; Edward C. Holmes; Eileen Serrano; Erick Salinas; Hala Alshammary; Harm van Bakel; Jayeeta Dutta; Jorge Levican; Juan Soto; Leonardo I. Almonacid; Mel Ben Leyton; Marcela Ferrer; Matthew M. Hernandez; Melissa Smith; Rafael A. Medina.; Robert Sebra; Shwetha Hara Sridhar; Tamara Garcia-Salmon; Viviana Simon; Ying-Chih Wang; Zenab Khan |
| EPI_ISL_2557397                                                                                                                                                                                                                                                                                                                                                                                                                                                                                                                                                                 | Laboratory of Respiratory Viruses and Measles, Oswaldo Cruz Institute, FIOCRUZ                                                                                                                                                                                                                                                                     | Laboratory of Respiratory Viruses and Measles, Oswaldo Cruz Institute, FIOCRUZ                                                                                                                                                                                                                                                                                                                                                                                                                                                                                                                                                                                                                                                                                                                                                                                                                                                                                                                                                                                     | Alice Sampaio Rocha; Ana Carolina Mendonca; Anna Carolina Paixao; Elisa Cavalcante Pereira; Fernando Motta; Luciana Appolinario; Marilida Siqueira on behalf of the FioCruz COVID-19 Genomic Surveillance Network; Paola Resende; Renata Serrano Lopes; Taina Venas                                                                                                                                                                                                                                       |
| EPI_ISL_1082301,<br>EPI_ISL_1082303                                                                                                                                                                                                                                                                                                                                                                                                                                                                                                                                             | Laboratory of Virology of Federal Budget Health Care Institution "Center of Hygiene and Epidemiology in Arkhangelsk region"                                                                                                                                                                                                                        | Group of Genomics and Postgenomic Technologies of Central Research Institute of Epidemiology                                                                                                                                                                                                                                                                                                                                                                                                                                                                                                                                                                                                                                                                                                                                                                                                                                                                                                                                                                       | Akimkin VG; Bulanenko VP; Cherkashina AS; Golubeva AV; Kaptelova VV; Kondrasheva LV; Korneenko EV; Ponomareva YA; Saenko SS; Samoilov AE; Semynia LV; Shishko LA; Speranskaya AS; Tivanova EV; Valdokhina AV                                                                                                                                                                                                                                                                                              |
| EPI_ISL_1341503,<br>EPI_ISL_1489929                                                                                                                                                                                                                                                                                                                                                                                                                                                                                                                                             | Laboratory of Virology, National center of expertise                                                                                                                                                                                                                                                                                               | RSE "National Center of Expertise" and RSE "National center for Biotechnology"                                                                                                                                                                                                                                                                                                                                                                                                                                                                                                                                                                                                                                                                                                                                                                                                                                                                                                                                                                                     | Abdaliyev Askar; Amirgazin Asylulan; Balykbaev Kanat; Kamalova Dinara; Ramankulov Erlan; Sharipova Saule; Shevtsov Alexandr; Tungushbayev Talgat                                                                                                                                                                                                                                                                                                                                                          |



|                                                                                                                                                                                                                                                                                                                                                                                       |                                                                                                                                                                                                                                                   |                                                                                                                                   |                                                                                                                                                                                                                                                                                                                                                                                                                             |
|---------------------------------------------------------------------------------------------------------------------------------------------------------------------------------------------------------------------------------------------------------------------------------------------------------------------------------------------------------------------------------------|---------------------------------------------------------------------------------------------------------------------------------------------------------------------------------------------------------------------------------------------------|-----------------------------------------------------------------------------------------------------------------------------------|-----------------------------------------------------------------------------------------------------------------------------------------------------------------------------------------------------------------------------------------------------------------------------------------------------------------------------------------------------------------------------------------------------------------------------|
| EPI_ISL_1191740                                                                                                                                                                                                                                                                                                                                                                       | Laboratory of virology and molecular diagnostics                                                                                                                                                                                                  | Laboratory of virology and molecular diagnostics                                                                                  | Boshevska Golubinka; Janchevska Elizabeta; Kuzmanovska Maja                                                                                                                                                                                                                                                                                                                                                                 |
| EPI_ISL_2392161, EPI_ISL_2681400, EPI_ISL_2681403, EPI_ISL_2681404, EPI_ISL_2681431, EPI_ISL_2681436, EPI_ISL_2681438, EPI_ISL_2987553, EPI_ISL_2987557, EPI_ISL_2987571, EPI_ISL_2987574                                                                                                                                                                                             |                                                                                                                                                                                                                                                   |                                                                                                                                   |                                                                                                                                                                                                                                                                                                                                                                                                                             |
| see above                                                                                                                                                                                                                                                                                                                                                                             | Laboratory of virology and molecular diagnostics, Institute of Public Health                                                                                                                                                                      | Laboratory of virology and molecular diagnostics, Institute of Public Health                                                      | Boshevska G; Janchevska E.; Kuzmanovska M                                                                                                                                                                                                                                                                                                                                                                                   |
| EPI_ISL_454585                                                                                                                                                                                                                                                                                                                                                                        | Laboratory of virology, National Center of Expertise                                                                                                                                                                                              | Laboratory of molecular-genetic research, National Center for Expertise, Kazakhstan National Center for Biotechnology, Kazakhstan | : Abdaliyev Askar; Akhmetollayev Ilyas; Amirgazin Asylulan; Aushakhmetova Zabira; Kalendar Ruslan; Lutsay Viktoriya; Rakhmetova Akbota; Ramankulov Yerlan; Shevtsov Alexandr                                                                                                                                                                                                                                                |
| EPI_ISL_1364615, EPI_ISL_1448018                                                                                                                                                                                                                                                                                                                                                      | Laboratory of virology, National center of expertise                                                                                                                                                                                              | RSE "National Center for Biotechnology" and RSE "National Center of Expertise"                                                    | Abdaliyev Askar; Amirgazin Asylulan; Balykbaev Kanat; Kamalova Dinara; Ramankulov Yerlan; Sharipova Saule; Shevtsov Alexandr; Tungushbayev Talgat                                                                                                                                                                                                                                                                           |
| EPI_ISL_2696437, EPI_ISL_2696689                                                                                                                                                                                                                                                                                                                                                      | Laboratory, Gravity Diagnostics                                                                                                                                                                                                                   | Laboratory, Gravity Diagnostics                                                                                                   | Diagnostics, G.                                                                                                                                                                                                                                                                                                                                                                                                             |
| EPI_ISL_576119                                                                                                                                                                                                                                                                                                                                                                        | Laboratory, The Bio Arte Limited                                                                                                                                                                                                                  | Laboratory, The Bio Arte Limited                                                                                                  | Biazzo, M.; Madeddu, S.; Pinzauti, D.; Santoro, F.                                                                                                                                                                                                                                                                                                                                                                          |
| EPI_ISL_2157506                                                                                                                                                                                                                                                                                                                                                                       | Laboratório Central de Saúde Pública do Estado do Paraná (LACEN/PR)                                                                                                                                                                               | Laboratory of Respiratory Viruses and Measles, Oswaldo Cruz Institute, FIOCRUZ                                                    | Alice Sampaio Rocha; Ana Carolina Mendonça; Anna Carolina Paixao; Elisa Cavalcante Pereira; Fernando Motta; Irina Nastassja Riediger; Luciana Appolinario; Maria do Carmo Debur; Marilda Siqueira on behalf of the Fiocruz COVID-19 Genomic Surveillance Network; Paola Resende; Renata Serrano Lopes; Taina Venas                                                                                                          |
| EPI_ISL_2777330, EPI_ISL_2777341, EPI_ISL_2777778, EPI_ISL_2777954                                                                                                                                                                                                                                                                                                                    | Laboratório Central de Saúde Pública do Amazonas - LACEN-AM                                                                                                                                                                                       | Laboratório de Ecologia de Doenças Transmissíveis na Amazonia, Instituto Leonidas e Maria Deane - Fiocruz Amazonia                | André Corado; Debora Duarte; Felipe Naveca; Fernanda Nascimento; George Silva; Karina Pessoa; Luciana Gonçalves; Maria Júlia Brandão; Matilde Mejia; Michele Jesus; Valdinete Nascimento; Victor Souza; Ágatha Costa                                                                                                                                                                                                        |
| EPI_ISL_541387                                                                                                                                                                                                                                                                                                                                                                        | Laboratório Central de Saúde Pública do Estado de Sergipe (LACEN-SE)                                                                                                                                                                              | Laboratory of Respiratory Viruses and Measles, Oswaldo Cruz Institute, FIOCRUZ                                                    | Ana Carolina Mendonça; Anna Carolina Paixão; Clioma Santos; Fernando Motta; Jonathan Lopes; Luciana Appolinario; Marilda Siqueira on behalf of the Fiocruz COVID-19 Genomic Surveillance Network; Paola Resende                                                                                                                                                                                                             |
| EPI_ISL_415128                                                                                                                                                                                                                                                                                                                                                                        | Laboratório Central de Saúde Pública do Estado do Espírito Santo (LACEN-ES)                                                                                                                                                                       | Laboratory of Respiratory Viruses and Measles, Oswaldo Cruz Institute, FIOCRUZ                                                    | Aline Mattos; Allison Fabri; Braulia Caetano; Cristiana Garcia; Fernando Motta; Joilson Xavier; Jonathan Lopes; Luciana Appolinario; Maria Nóbrega; Maria Ogrzewalska; Marilda Siqueira on behalf of the Fiocruz COVID-19 Genomic Surveillance Network; Milene Miranda; Paola Resende; Sunando Roy                                                                                                                          |
| EPI_ISL_729832                                                                                                                                                                                                                                                                                                                                                                        | Laboratório Central de Saúde Pública do Estado do Rio Grande do Sul (LACEN-RS)                                                                                                                                                                    | Laboratory of Respiratory Viruses and Measles, Oswaldo Cruz Institute, FIOCRUZ                                                    | Ana Carolina Mendonça; Anna Carolina Paixão; Fernando Motta; Luciana Appolinario; Marilda Siqueira on behalf of the Fiocruz COVID-19 Genomic Surveillance Network; Marilda Tereza Mar da Rosa; Paola Resende; Tatiana Schaffer Gregianni                                                                                                                                                                                    |
| EPI_ISL_2150977, EPI_ISL_2158597, EPI_ISL_2158598, EPI_ISL_2158601                                                                                                                                                                                                                                                                                                                    | Laboratório de Biologia Molecular Jean Piaget                                                                                                                                                                                                     | MRCG at LSHTM, Genomics lab                                                                                                       | Abdoulie Kante; Abdul Karim Sesay; Adul Candé; Aicha Balde; Aladje Balde; Bakary Sanyang; Bubacar Delgado Pinto Embalá; Dabiri Damilari; Edmira Maria da Costa; Erica Luis Maria Magalhães; Faatu Cassama; Mariama Kujabi; Milanca Agostinho Cá; Paulina Joáozinho da Costa Jarra Manneh; Rei José Pereira; Rui Inndi; Sainabou Laye Ndure; Simão Tchuda Bióté                                                              |
| EPI_ISL_2835169                                                                                                                                                                                                                                                                                                                                                                       | Laboratório de Biotecnologia Aplicada (LBA) - Laboratório de Biologia Molecular - Hospital das Clínicas, Faculdade de Medicina de Botucatu, Departamento de Bioprocessos e Biotecnologia - Faculdade de Ciências Agrônomicas, UNESP - Botucatu/SP | Laboratory of Respiratory Viruses and Measles, Oswaldo Cruz Institute, FIOCRUZ                                                    | Alice Sampaio Rocha; Ana Carolina Mendonça; Anna Carolina Paixao; Elisa Cavalcante Pereira; Felipe Allan da Silva Costa; Fernando Motta; Jayme Augusto de Souza Neto; Leonardo Nazario de Moraes; Luciana Appolinario; Marilda Siqueira on behalf of the Fiocruz COVID-19 Genomic Surveillance Network; Paola Resende; Patricia Akemi Assato; Rejane Maria Tommasini; Renata Serrano Lopes; Taina Venas                     |
| EPI_ISL_832012                                                                                                                                                                                                                                                                                                                                                                        | Laboratório de Microbiologia Molecular - Universidade FEEVALE                                                                                                                                                                                     | Universidade Federal de Ciências da Saúde de Porto Alegre                                                                         | Amanda de Menezes Mayer; Carla Andretta Moreira Neves; Claudia Elizabeth Thompson; Fernando Rosado Spilki; Gabriel Dickin Caldana; Gabriela Bettella Cybis; Livia Kmetzsch; Patricia Aline Gróhs Ferrareze; Ricardo Ariel Zimmerman; Vinicius Bonetti Franceschi                                                                                                                                                            |
| EPI_ISL_1216912                                                                                                                                                                                                                                                                                                                                                                       | Labormedizin Darmstadt                                                                                                                                                                                                                            | Robert Koch Institute                                                                                                             |                                                                                                                                                                                                                                                                                                                                                                                                                             |
| EPI_ISL_1233630, EPI_ISL_1233663, EPI_ISL_1299921, EPI_ISL_1914638, EPI_ISL_1973556, EPI_ISL_2274472, EPI_ISL_2484522, EPI_ISL_2768405, EPI_ISL_3030090                                                                                                                                                                                                                               |                                                                                                                                                                                                                                                   |                                                                                                                                   |                                                                                                                                                                                                                                                                                                                                                                                                                             |
| see above                                                                                                                                                                                                                                                                                                                                                                             | Labormedizinisches Zentrum Dr Risch                                                                                                                                                                                                               | Clinical Bacteriology                                                                                                             | Adrian Egli; Alfredo Mari; Fanny Wegner; Hans Hirsch; Helena MB Seth-Smith; Julia Bielicki; Karoline Leuzinger; Lorenz Risch; Madlen Stange; Manuel Battegay; Martin Risch; Nadia Wohlwend; Tim Roloff                                                                                                                                                                                                                      |
| EPI_ISL_2677281, EPI_ISL_2677286                                                                                                                                                                                                                                                                                                                                                      | Laboratório Central de Saúde Pública do Estado de Santa Catarina (LACEN/SC)                                                                                                                                                                       | Laboratory of Respiratory Viruses and Measles, Oswaldo Cruz Institute, FIOCRUZ                                                    | Alice Sampaio Rocha; Ana Carolina Mendonça; Anna Carolina Paixao; Darcita Buerger Rovaris; Elisa Cavalcante Pereira; Fernando Motta; Luciana Appolinario; Marilda Siqueira on behalf of the Fiocruz COVID-19 Genomic Surveillance Network; Paola Resende; Renata Serrano Lopes; Sandra Bianchini Fernandes; Taina Venas                                                                                                     |
| EPI_ISL_660133                                                                                                                                                                                                                                                                                                                                                                        | Lancet                                                                                                                                                                                                                                            | National Health Laboratory Service (NHS), Tygerberg                                                                               | Bronwyn Kleinhans; Davis M-A; Draper C; Eduan Wilkindon; Gert van Zyl; Houriyah Tegally; Hsiao M; Kayla Delaney; Siegfried N; Susan Engelbrecht; Tulio de Oliveira; Williamson C; Wolfgang Preiser                                                                                                                                                                                                                          |
| EPI_ISL_2013052                                                                                                                                                                                                                                                                                                                                                                       | Lancet Laboratories                                                                                                                                                                                                                               | National Institute for Communicable Diseases of the National Health Laboratory Service                                            | Amoako DG; Bhiman JN; Glass A; Mahlangu B; Mohale T; Ntuli N; Scheepers C; Viana R                                                                                                                                                                                                                                                                                                                                          |
| EPI_ISL_738336, EPI_ISL_812275, EPI_ISL_812281                                                                                                                                                                                                                                                                                                                                        | Landstuhl Regional Medical Center                                                                                                                                                                                                                 | United States Air Force School of Aerospace Medicine                                                                              | Amanda Javorina; Anthony Fries; Clarise Starr; Cole Anderson; Elizabeth Macias; Fritz Castillo; Jennifer Meyer; Sarah Purves; William Gruner                                                                                                                                                                                                                                                                                |
| EPI_ISL_407079                                                                                                                                                                                                                                                                                                                                                                        | Lapland Central Hospital                                                                                                                                                                                                                          | Department of Virology, University of Helsinki and Helsinki University Hospital, Helsinki, Finland                                | Hannimari Kallio-Kokko; Olli Vapalahti; Suvi Kuivanen; Teemu Smura                                                                                                                                                                                                                                                                                                                                                          |
| EPI_ISL_2811989                                                                                                                                                                                                                                                                                                                                                                       | Laverty Pathology                                                                                                                                                                                                                                 | NSW Health Pathology - Institute of Clinical Pathology and Medical Research; Westmead Hospital; University of Sydney              | CIDM-PH et al.                                                                                                                                                                                                                                                                                                                                                                                                              |
| EPI_ISL_2863684                                                                                                                                                                                                                                                                                                                                                                       | Laboratório Central de Saúde Pública do Estado do Paraná (LACEN/PR)                                                                                                                                                                               | Laboratory of Respiratory Viruses and Measles, Oswaldo Cruz Institute, FIOCRUZ                                                    | Agatha Cristinne Prudencio; Alice Sampaio Rocha; Ana Carolina Mendonça; Anna Carolina Paixao; Elisa Cavalcante Pereira; Fernando Motta; Ighor Leonardo Arantes Gomes; Irina Riediger; Luciana Appolinario; Marilda Siqueira on behalf of the Fiocruz COVID-19 Genomic Surveillance Network; Paola Resende; Renata Serrano Lopes; Taina Venas                                                                                |
| EPI_ISL_2779329                                                                                                                                                                                                                                                                                                                                                                       | Life Care Hospital (Bungoma)                                                                                                                                                                                                                      | USAMRD-A, Basic Science Laboratory                                                                                                | Alan Lemtudo; Beth Mutai; Brian Andika; Carol Kifude; Clement Masakwe; Eric Muthanje; Esther Omuseni; Faith Sigel; Gathii Kimita; George Awinda; John Waitumbi; Josphat Nyataya; Rachel Githii; Rehema Liyari; Stephen Ochola                                                                                                                                                                                               |
| EPI_ISL_2136815                                                                                                                                                                                                                                                                                                                                                                       | Life Sciences Center, Vilnius University                                                                                                                                                                                                          | Institute of Biotechnology, Life Sciences Center, Vilnius University                                                              | Albertas Timinskas; Alma Gedvilaitė; Dangquole Ziogiene; Emilija Vasiluinaite; Milda Norkiene                                                                                                                                                                                                                                                                                                                               |
| EPI_ISL_1510207                                                                                                                                                                                                                                                                                                                                                                       | Life Sciences Center, Vilnius University                                                                                                                                                                                                          | Vilnius University Hospital Santaros Klinikos, Center of Laboratory Medicine                                                      | Daniel Naumovas; Dovile Ezerškyte; Gytis Dudas; Ingrida Olendraitė; Laimonas Griskevičius; Ligita Raugaite; Mindaugas Stoskus; Monika Katenaite; Rimvydas Norvilas                                                                                                                                                                                                                                                          |
| EPI_ISL_701677, EPI_ISL_701777, EPI_ISL_703603, EPI_ISL_709416, EPI_ISL_720734                                                                                                                                                                                                                                                                                                        |                                                                                                                                                                                                                                                   |                                                                                                                                   |                                                                                                                                                                                                                                                                                                                                                                                                                             |
| see above                                                                                                                                                                                                                                                                                                                                                                             | Lighthouse Lab in Alderley Park                                                                                                                                                                                                                   | Wellcome Sanger Institute for the COVID-19 Genomics UK (COG-UK) Consortium                                                        | Cordelia Langford; David K. Jackson; Dominic Kwiatkowski; Ewan Harrison; Ian Johnston; Jacquelyn Wynn; John Sillitoe on behalf of the Wellcome Sanger Institute COVID-19 Surveillance Team; Mairaed Hyland; Roberto Amato; Sonia Goncalves; The Lighthouse Lab in Alderley Park and Alex Alderton                                                                                                                           |
| EPI_ISL_597618, EPI_ISL_597757, EPI_ISL_606128, EPI_ISL_611066, EPI_ISL_625220                                                                                                                                                                                                                                                                                                        | Lighthouse Lab in Alderley Park                                                                                                                                                                                                                   | Wellcome Sanger Institute for the COVID-19 Genomics UK (COG-UK) consortium                                                        | Cordelia Langford; David K. Jackson; Dominic Kwiatkowski; Ewan Harrison; Ian Johnston; Jacquelyn Wynn; John Sillitoe on behalf of the Wellcome Sanger Institute COVID-19 Surveillance Team; John Sillitoe on behalf of the Wellcome Sanger Institute COVID-19 Surveillance Team (http://www.sanger.ac.uk/covid-team); Mairaed Hyland; Roberto Amato; Sonia Goncalves; The Lighthouse Lab in Alderley Park and Alex Alderton |
| EPI_ISL_1263915, EPI_ISL_1275626, EPI_ISL_1275723, EPI_ISL_1275862, EPI_ISL_1276977, EPI_ISL_1316141, EPI_ISL_1316216, EPI_ISL_1316218, EPI_ISL_1327314, EPI_ISL_1327532, EPI_ISL_1327570, EPI_ISL_1329240, EPI_ISL_1332662, EPI_ISL_1332697, EPI_ISL_1409592, EPI_ISL_1409671, EPI_ISL_1467652, EPI_ISL_1473620, EPI_ISL_1538088, EPI_ISL_1584041, EPI_ISL_1652995, EPI_ISL_1719191, |                                                                                                                                                                                                                                                   |                                                                                                                                   |                                                                                                                                                                                                                                                                                                                                                                                                                             |
| see above                                                                                                                                                                                                                                                                                                                                                                             | Lighthouse Lab in Cambridge                                                                                                                                                                                                                       | Wellcome Sanger Institute for the COVID-19 Genomics UK (COG-UK) Consortium                                                        | Cordelia Langford; David K. Jackson; Dominic Kwiatkowski; Ewan Harrison; Ian Johnston; Jeffrey Barrett; John Sillitoe on behalf of the Wellcome Sanger Institute COVID-19 Surveillance Team; Rob Howes; Roberto Amato; Sonia Goncalves; The Lighthouse Lab in Cambridge and Alex Alderton                                                                                                                                   |
| EPI_ISL_608558                                                                                                                                                                                                                                                                                                                                                                        | Lighthouse Lab in Cambridge                                                                                                                                                                                                                       | Wellcome Sanger Institute for the COVID-19 Genomics UK (COG-UK) consortium                                                        | Cordelia Langford; David K. Jackson; Dominic Kwiatkowski; Ewan Harrison; Ian Johnston; John Sillitoe on behalf of the Wellcome Sanger Institute COVID-19 Surveillance Team; Rob Howes; Roberto Amato; Sonia Goncalves; The Lighthouse Lab in Cambridge and Alex Alderton                                                                                                                                                    |
| EPI_ISL_720767, EPI_ISL_760686, EPI_ISL_760985, EPI_ISL_859475, EPI_ISL_989853, EPI_ISL_1084473, EPI_ISL_1333020, EPI_ISL_1333066, EPI_ISL_1333267, EPI_ISL_1333902, EPI_ISL_1413324, EPI_ISL_2960675                                                                                                                                                                                 |                                                                                                                                                                                                                                                   |                                                                                                                                   |                                                                                                                                                                                                                                                                                                                                                                                                                             |
| see above                                                                                                                                                                                                                                                                                                                                                                             | Lighthouse Lab in Glasgow                                                                                                                                                                                                                         | Wellcome Sanger Institute for the COVID-19 Genomics UK (COG-UK) Consortium                                                        | Anna Dominiczak and Alex Alderton; Carol Clugston; Cordelia Langford; David Gray; David K. Jackson; Dominic Kwiatkowski; Ewan Harrison; Harper VanSteenhouse; Ian Johnston; Jeffrey Barrett; John Sillitoe on behalf of the Wellcome Sanger Institute COVID-19 Surveillance Team (http://www.sanger.ac.uk/covid-team); Roberto Amato; Sonia Goncalves; Yumi Kasai                                                           |
| EPI_ISL_530530, EPI_ISL_530548, EPI_ISL_532638, EPI_ISL_532883, EPI_ISL_533001, EPI_ISL_533038, EPI_ISL_533069                                                                                                                                                                                                                                                                        |                                                                                                                                                                                                                                                   |                                                                                                                                   |                                                                                                                                                                                                                                                                                                                                                                                                                             |
| see above                                                                                                                                                                                                                                                                                                                                                                             | Lighthouse Lab in Glasgow                                                                                                                                                                                                                         | Wellcome Sanger Institute for the COVID-19 Genomics UK (COG-UK) consortium                                                        | Anna Dominiczak and Alex Alderton; Carol Clugston; Cordelia Langford; David Gray; David K. Jackson; Dominic Kwiatkowski; Ewan Harrison; Harper VanSteenhouse; Ian Johnston; John Sillitoe; Roberto Amato; Sonia Goncalves; Yumi Kasai                                                                                                                                                                                       |
| EPI_ISL_878751, EPI_ISL_1072347, EPI_ISL_1332568, EPI_ISL_1631640, EPI_ISL_1698027, EPI_ISL_1698076, EPI_ISL_2317665                                                                                                                                                                                                                                                                  |                                                                                                                                                                                                                                                   |                                                                                                                                   |                                                                                                                                                                                                                                                                                                                                                                                                                             |
| see above                                                                                                                                                                                                                                                                                                                                                                             | Lighthouse Lab in Milton Keynes                                                                                                                                                                                                                   | Wellcome Sanger Institute for the COVID-19 Genomics UK (COG-UK) Consortium                                                        | Cordelia Langford; David K. Jackson; Dominic Kwiatkowski; Ewan Harrison; Ian Johnston; Jeffrey Barrett; John Sillitoe on behalf of the Wellcome Sanger Institute COVID-19 Surveillance Team; Roberto Amato; Sonia Goncalves; The Lighthouse Lab in Milton Keynes and Alex Alderton                                                                                                                                          |
| EPI_ISL_552471, EPI_ISL_553021, EPI_ISL_553243, EPI_ISL_557188, EPI_ISL_606702, EPI_ISL_606838                                                                                                                                                                                                                                                                                        | Lighthouse Lab in Milton Keynes                                                                                                                                                                                                                   | Wellcome Sanger Institute for the COVID-19 Genomics UK (COG-UK) consortium                                                        | Cordelia Langford; David K. Jackson; Dominic Kwiatkowski; Ewan Harrison; Ian Johnston; John Sillitoe on behalf of the Wellcome Sanger Institute COVID-19 Surveillance Team; John Sillitoe on behalf of the Wellcome Sanger Institute COVID-19 Surveillance Team (http://www.sanger.ac.uk/covid-team); Roberto Amato; Sonia Goncalves; The Lighthouse Lab in Milton Keynes and Alex Alderton                                 |
| EPI_ISL_2635692                                                                                                                                                                                                                                                                                                                                                                       | Limbach - MVZ Humangenetik Ulm                                                                                                                                                                                                                    | Robert Koch Institute                                                                                                             |                                                                                                                                                                                                                                                                                                                                                                                                                             |
| EPI_ISL_603088, EPI_ISL_603119, EPI_ISL_636840, EPI_ISL_636842, EPI_ISL_636870, EPI_ISL_636880, EPI_ISL_636881, EPI_ISL_636888                                                                                                                                                                                                                                                        |                                                                                                                                                                                                                                                   |                                                                                                                                   |                                                                                                                                                                                                                                                                                                                                                                                                                             |
| see above                                                                                                                                                                                                                                                                                                                                                                             | Lithuanian University of Health Sciences Hospital, Department of Laboratory Medicine                                                                                                                                                              | Lithuanian University of Health Sciences, Molecular cardiology lab.                                                               | Arnoldas Pautienius; Astra Vitkauskieni; Dovydas Gecys; Ingrida Olendraitė; Kamile Tamauskaite; Laura Pareckaitė; Lukas Zemaits; Vaiva Lesauskaite                                                                                                                                                                                                                                                                          |
| EPI_ISL_1502008                                                                                                                                                                                                                                                                                                                                                                       | Lurie Children's Hospital of Chicago                                                                                                                                                                                                              | Northwestern University - Ozer Lab                                                                                                | Egon A. Ozer; Judd F. Hultquist; Lacy M. Simons; Larry K. Kocielek; Michael G. Ison; Ramon Lorenzo-Redondo; Taylor J. Dean; William J. Muller; Xiaotian; Zheng                                                                                                                                                                                                                                                              |

|                                                                                                                                                                                                                                                                                                                                                                                                                                                                                                                                                                                                                                                                                                                                                                                                                                                                                                                                                                                                                                                                                                                                                                                                                                                                                                                                                                                                                                                                                                                                                                                                                                                                                                                                                                                                                                                                                                                                                                                                                                                                                                                                                                                                                                                                                                                                                                                                                                                                                                                                                                                                                                                                                                                                                                                                                                                                                                                                                                                                                                                                                                                                                                                                                                                                                                                                                                                                                                                                                                                                                                                                                                                                                                                                                                                                                                                                                                                                                                                                  |                                                                                                          |                                                                                                                            |                                                                                                                                                                                                                                                                                                                                                                                                                                                                                                                                                                                                                                                                                                                                                                                                                                           |                                                                                                                                       |
|--------------------------------------------------------------------------------------------------------------------------------------------------------------------------------------------------------------------------------------------------------------------------------------------------------------------------------------------------------------------------------------------------------------------------------------------------------------------------------------------------------------------------------------------------------------------------------------------------------------------------------------------------------------------------------------------------------------------------------------------------------------------------------------------------------------------------------------------------------------------------------------------------------------------------------------------------------------------------------------------------------------------------------------------------------------------------------------------------------------------------------------------------------------------------------------------------------------------------------------------------------------------------------------------------------------------------------------------------------------------------------------------------------------------------------------------------------------------------------------------------------------------------------------------------------------------------------------------------------------------------------------------------------------------------------------------------------------------------------------------------------------------------------------------------------------------------------------------------------------------------------------------------------------------------------------------------------------------------------------------------------------------------------------------------------------------------------------------------------------------------------------------------------------------------------------------------------------------------------------------------------------------------------------------------------------------------------------------------------------------------------------------------------------------------------------------------------------------------------------------------------------------------------------------------------------------------------------------------------------------------------------------------------------------------------------------------------------------------------------------------------------------------------------------------------------------------------------------------------------------------------------------------------------------------------------------------------------------------------------------------------------------------------------------------------------------------------------------------------------------------------------------------------------------------------------------------------------------------------------------------------------------------------------------------------------------------------------------------------------------------------------------------------------------------------------------------------------------------------------------------------------------------------------------------------------------------------------------------------------------------------------------------------------------------------------------------------------------------------------------------------------------------------------------------------------------------------------------------------------------------------------------------------------------------------------------------------------------------------------------------|----------------------------------------------------------------------------------------------------------|----------------------------------------------------------------------------------------------------------------------------|-------------------------------------------------------------------------------------------------------------------------------------------------------------------------------------------------------------------------------------------------------------------------------------------------------------------------------------------------------------------------------------------------------------------------------------------------------------------------------------------------------------------------------------------------------------------------------------------------------------------------------------------------------------------------------------------------------------------------------------------------------------------------------------------------------------------------------------------|---------------------------------------------------------------------------------------------------------------------------------------|
| EPI_ISL_2827933, EPI_ISL_2827939, EPI_ISL_2984851, EPI_ISL_2984857, EPI_ISL_3024551, EPI_ISL_3024553, EPI_ISL_3024567, EPI_ISL_3024568                                                                                                                                                                                                                                                                                                                                                                                                                                                                                                                                                                                                                                                                                                                                                                                                                                                                                                                                                                                                                                                                                                                                                                                                                                                                                                                                                                                                                                                                                                                                                                                                                                                                                                                                                                                                                                                                                                                                                                                                                                                                                                                                                                                                                                                                                                                                                                                                                                                                                                                                                                                                                                                                                                                                                                                                                                                                                                                                                                                                                                                                                                                                                                                                                                                                                                                                                                                                                                                                                                                                                                                                                                                                                                                                                                                                                                                           |                                                                                                          |                                                                                                                            |                                                                                                                                                                                                                                                                                                                                                                                                                                                                                                                                                                                                                                                                                                                                                                                                                                           |                                                                                                                                       |
| see above                                                                                                                                                                                                                                                                                                                                                                                                                                                                                                                                                                                                                                                                                                                                                                                                                                                                                                                                                                                                                                                                                                                                                                                                                                                                                                                                                                                                                                                                                                                                                                                                                                                                                                                                                                                                                                                                                                                                                                                                                                                                                                                                                                                                                                                                                                                                                                                                                                                                                                                                                                                                                                                                                                                                                                                                                                                                                                                                                                                                                                                                                                                                                                                                                                                                                                                                                                                                                                                                                                                                                                                                                                                                                                                                                                                                                                                                                                                                                                                        | MANKWEG LABORATORY                                                                                       | National Institute for Communicable Diseases of the National Health Laboratory Service                                     |                                                                                                                                                                                                                                                                                                                                                                                                                                                                                                                                                                                                                                                                                                                                                                                                                                           | Amoako DG; Bhiman JN; Everatt J; Ismail A; Mahlangu B; Mnguni A; Mohale T; Ntuli N; Scheepers C                                       |
| EPI_ISL_1258302, EPI_ISL_1594077, EPI_ISL_2495486, EPI_ISL_2495574, EPI_ISL_2495647, EPI_ISL_2495669                                                                                                                                                                                                                                                                                                                                                                                                                                                                                                                                                                                                                                                                                                                                                                                                                                                                                                                                                                                                                                                                                                                                                                                                                                                                                                                                                                                                                                                                                                                                                                                                                                                                                                                                                                                                                                                                                                                                                                                                                                                                                                                                                                                                                                                                                                                                                                                                                                                                                                                                                                                                                                                                                                                                                                                                                                                                                                                                                                                                                                                                                                                                                                                                                                                                                                                                                                                                                                                                                                                                                                                                                                                                                                                                                                                                                                                                                             | MB-Cadham Provincial laboratory                                                                          | National Microbiology Laboratory (NML)                                                                                     | Anna Majer; Anneliese Landgraaff; CanCOGen's metadata curation team; Darian Hole; David Alexander; Elsie Grudesk; Gary Van Domselaar; Grace Seo; Jared Bullard; Jennifer Tanner; Kerry Dust; Kirsten Biggar; Madison Chapel; Morag Graham; Natalie Knox; Nathalie Bastien; Paul Van Caeesee; Philip Mabon; Public Health Agency of Canada CanCOGen team; Rhiannon Huzarewicz; Russell Mandes; Shari Tyson; Timothy Booth; Yan Li                                                                                                                                                                                                                                                                                                                                                                                                          |                                                                                                                                       |
| EPI_ISL_1152607, EPI_ISL_1435428                                                                                                                                                                                                                                                                                                                                                                                                                                                                                                                                                                                                                                                                                                                                                                                                                                                                                                                                                                                                                                                                                                                                                                                                                                                                                                                                                                                                                                                                                                                                                                                                                                                                                                                                                                                                                                                                                                                                                                                                                                                                                                                                                                                                                                                                                                                                                                                                                                                                                                                                                                                                                                                                                                                                                                                                                                                                                                                                                                                                                                                                                                                                                                                                                                                                                                                                                                                                                                                                                                                                                                                                                                                                                                                                                                                                                                                                                                                                                                 | MDI Limbach Berlin GmbH                                                                                  | Robert Koch Institute                                                                                                      |                                                                                                                                                                                                                                                                                                                                                                                                                                                                                                                                                                                                                                                                                                                                                                                                                                           |                                                                                                                                       |
| EPI_ISL_2120501, EPI_ISL_2472756, EPI_ISL_2632870, EPI_ISL_2678707, EPI_ISL_2678719, EPI_ISL_2761877                                                                                                                                                                                                                                                                                                                                                                                                                                                                                                                                                                                                                                                                                                                                                                                                                                                                                                                                                                                                                                                                                                                                                                                                                                                                                                                                                                                                                                                                                                                                                                                                                                                                                                                                                                                                                                                                                                                                                                                                                                                                                                                                                                                                                                                                                                                                                                                                                                                                                                                                                                                                                                                                                                                                                                                                                                                                                                                                                                                                                                                                                                                                                                                                                                                                                                                                                                                                                                                                                                                                                                                                                                                                                                                                                                                                                                                                                             | MDI Limbach Berlin GmbH; MVZ Labor Berlin                                                                | Robert Koch Institute                                                                                                      |                                                                                                                                                                                                                                                                                                                                                                                                                                                                                                                                                                                                                                                                                                                                                                                                                                           |                                                                                                                                       |
| EPI_ISL_568978, EPI_ISL_569028, EPI_ISL_569395, EPI_ISL_569496, EPI_ISL_900072, EPI_ISL_900176, EPI_ISL_1020363, EPI_ISL_1694792                                                                                                                                                                                                                                                                                                                                                                                                                                                                                                                                                                                                                                                                                                                                                                                                                                                                                                                                                                                                                                                                                                                                                                                                                                                                                                                                                                                                                                                                                                                                                                                                                                                                                                                                                                                                                                                                                                                                                                                                                                                                                                                                                                                                                                                                                                                                                                                                                                                                                                                                                                                                                                                                                                                                                                                                                                                                                                                                                                                                                                                                                                                                                                                                                                                                                                                                                                                                                                                                                                                                                                                                                                                                                                                                                                                                                                                                 |                                                                                                          |                                                                                                                            |                                                                                                                                                                                                                                                                                                                                                                                                                                                                                                                                                                                                                                                                                                                                                                                                                                           |                                                                                                                                       |
| see above                                                                                                                                                                                                                                                                                                                                                                                                                                                                                                                                                                                                                                                                                                                                                                                                                                                                                                                                                                                                                                                                                                                                                                                                                                                                                                                                                                                                                                                                                                                                                                                                                                                                                                                                                                                                                                                                                                                                                                                                                                                                                                                                                                                                                                                                                                                                                                                                                                                                                                                                                                                                                                                                                                                                                                                                                                                                                                                                                                                                                                                                                                                                                                                                                                                                                                                                                                                                                                                                                                                                                                                                                                                                                                                                                                                                                                                                                                                                                                                        | MEPHI, Aix Marseille University                                                                          | MEPHI, Aix Marseille University                                                                                            |                                                                                                                                                                                                                                                                                                                                                                                                                                                                                                                                                                                                                                                                                                                                                                                                                                           | Anthony LEVASSEUR                                                                                                                     |
| EPI_ISL_2895751, EPI_ISL_2895753, EPI_ISL_2895755, EPI_ISL_2895756, EPI_ISL_2895757, EPI_ISL_2895759, EPI_ISL_2895760, EPI_ISL_2895763, EPI_ISL_2895764, EPI_ISL_2895765, EPI_ISL_2942282                                                                                                                                                                                                                                                                                                                                                                                                                                                                                                                                                                                                                                                                                                                                                                                                                                                                                                                                                                                                                                                                                                                                                                                                                                                                                                                                                                                                                                                                                                                                                                                                                                                                                                                                                                                                                                                                                                                                                                                                                                                                                                                                                                                                                                                                                                                                                                                                                                                                                                                                                                                                                                                                                                                                                                                                                                                                                                                                                                                                                                                                                                                                                                                                                                                                                                                                                                                                                                                                                                                                                                                                                                                                                                                                                                                                        |                                                                                                          |                                                                                                                            |                                                                                                                                                                                                                                                                                                                                                                                                                                                                                                                                                                                                                                                                                                                                                                                                                                           |                                                                                                                                       |
| see above                                                                                                                                                                                                                                                                                                                                                                                                                                                                                                                                                                                                                                                                                                                                                                                                                                                                                                                                                                                                                                                                                                                                                                                                                                                                                                                                                                                                                                                                                                                                                                                                                                                                                                                                                                                                                                                                                                                                                                                                                                                                                                                                                                                                                                                                                                                                                                                                                                                                                                                                                                                                                                                                                                                                                                                                                                                                                                                                                                                                                                                                                                                                                                                                                                                                                                                                                                                                                                                                                                                                                                                                                                                                                                                                                                                                                                                                                                                                                                                        | MIDDLELBURG LABORATORY                                                                                   | National Institute for Communicable Diseases of the National Health Laboratory Service                                     |                                                                                                                                                                                                                                                                                                                                                                                                                                                                                                                                                                                                                                                                                                                                                                                                                                           | Amoako DG; Bhiman JN; Everatt J; Ismail A; Mahlangu B; Mnguni A; Mohale T; Ntuli N; Scheepers C                                       |
| EPI_ISL_2566568                                                                                                                                                                                                                                                                                                                                                                                                                                                                                                                                                                                                                                                                                                                                                                                                                                                                                                                                                                                                                                                                                                                                                                                                                                                                                                                                                                                                                                                                                                                                                                                                                                                                                                                                                                                                                                                                                                                                                                                                                                                                                                                                                                                                                                                                                                                                                                                                                                                                                                                                                                                                                                                                                                                                                                                                                                                                                                                                                                                                                                                                                                                                                                                                                                                                                                                                                                                                                                                                                                                                                                                                                                                                                                                                                                                                                                                                                                                                                                                  | MKK Mühlenkreiskliniken, Johannes Wesling Klinikum Minden                                                | Hannover Medical School, Institute of Virology                                                                             |                                                                                                                                                                                                                                                                                                                                                                                                                                                                                                                                                                                                                                                                                                                                                                                                                                           | Lars Steinbrück                                                                                                                       |
| EPI_ISL_1226380                                                                                                                                                                                                                                                                                                                                                                                                                                                                                                                                                                                                                                                                                                                                                                                                                                                                                                                                                                                                                                                                                                                                                                                                                                                                                                                                                                                                                                                                                                                                                                                                                                                                                                                                                                                                                                                                                                                                                                                                                                                                                                                                                                                                                                                                                                                                                                                                                                                                                                                                                                                                                                                                                                                                                                                                                                                                                                                                                                                                                                                                                                                                                                                                                                                                                                                                                                                                                                                                                                                                                                                                                                                                                                                                                                                                                                                                                                                                                                                  | MO State Public Health Laboratory                                                                        | Genomics and Discovery, Respiratory Viruses Branch, Division of Viral Diseases, Centers for Disease Control and Prevention | Anna Montmayeur; Anna Uehara; Ben L. Rambo-Martin; Clinton R. Paden; Dhvani Batra; Haibin Wang; Jasmine Padilla; Jing Zhang; Justin Lee; Katie Dillon; Krista Queen; Kristen Kripe; Kristine Lacey; Lori Rowe; Mark Burroughs; Matthew Schmerer; Mili Sheth; Peter W. Cook; Rachel Marine; Sam Shepard; Sarah Nobles; Shoshona Le; Suxiang Tong; Yan Li; Ying Tao                                                                                                                                                                                                                                                                                                                                                                                                                                                                         |                                                                                                                                       |
| EPI_ISL_2556117, EPI_ISL_2557251                                                                                                                                                                                                                                                                                                                                                                                                                                                                                                                                                                                                                                                                                                                                                                                                                                                                                                                                                                                                                                                                                                                                                                                                                                                                                                                                                                                                                                                                                                                                                                                                                                                                                                                                                                                                                                                                                                                                                                                                                                                                                                                                                                                                                                                                                                                                                                                                                                                                                                                                                                                                                                                                                                                                                                                                                                                                                                                                                                                                                                                                                                                                                                                                                                                                                                                                                                                                                                                                                                                                                                                                                                                                                                                                                                                                                                                                                                                                                                 | MOH - Jaber Al-Ahmad Hospital (Innovation Research Laboratory)                                           | MOH - Jaber Al-Ahmad Hospital (Innovation Research Laboratory)                                                             |                                                                                                                                                                                                                                                                                                                                                                                                                                                                                                                                                                                                                                                                                                                                                                                                                                           | Mohammad Alghounaim; Salman Al-Sabah                                                                                                  |
| EPI_ISL_2779435                                                                                                                                                                                                                                                                                                                                                                                                                                                                                                                                                                                                                                                                                                                                                                                                                                                                                                                                                                                                                                                                                                                                                                                                                                                                                                                                                                                                                                                                                                                                                                                                                                                                                                                                                                                                                                                                                                                                                                                                                                                                                                                                                                                                                                                                                                                                                                                                                                                                                                                                                                                                                                                                                                                                                                                                                                                                                                                                                                                                                                                                                                                                                                                                                                                                                                                                                                                                                                                                                                                                                                                                                                                                                                                                                                                                                                                                                                                                                                                  | MOH-K                                                                                                    | USAMRD-A, Basic Science Laboratory                                                                                         | Alan Lemtudo; Beth Mutai; Brian Andika; Carol Kifude; Clement Masakwe; Eric Muthanje; Esther Omuseni; Faith Sigei; Gathii Kimita; George Awinda; John Waitumbi; Josphat Nyataya; Rachel Githii; Rehema Liyai; Stephen Ochola                                                                                                                                                                                                                                                                                                                                                                                                                                                                                                                                                                                                              |                                                                                                                                       |
| EPI_ISL_2779526, EPI_ISL_2779528, EPI_ISL_2779534                                                                                                                                                                                                                                                                                                                                                                                                                                                                                                                                                                                                                                                                                                                                                                                                                                                                                                                                                                                                                                                                                                                                                                                                                                                                                                                                                                                                                                                                                                                                                                                                                                                                                                                                                                                                                                                                                                                                                                                                                                                                                                                                                                                                                                                                                                                                                                                                                                                                                                                                                                                                                                                                                                                                                                                                                                                                                                                                                                                                                                                                                                                                                                                                                                                                                                                                                                                                                                                                                                                                                                                                                                                                                                                                                                                                                                                                                                                                                | MOH-Q                                                                                                    | USAMRD-A, Basic Science Laboratory                                                                                         | Alan Lemtudo; Beth Mutai; Brian Andika; Carol Kifude; Clement Masakwe; Eric Muthanje; Esther Omuseni; Faith Sigei; Gathii Kimita; George Awinda; John Waitumbi; Josphat Nyataya; Rachel Githii; Rehema Liyai; Stephen Ochola                                                                                                                                                                                                                                                                                                                                                                                                                                                                                                                                                                                                              |                                                                                                                                       |
| EPI_ISL_2346387, EPI_ISL_2346398, EPI_ISL_2346404, EPI_ISL_2346424, EPI_ISL_2346425, EPI_ISL_2346426, EPI_ISL_2346428, EPI_ISL_2346429, EPI_ISL_2346430, EPI_ISL_2346432, EPI_ISL_2346434, EPI_ISL_2346435                                                                                                                                                                                                                                                                                                                                                                                                                                                                                                                                                                                                                                                                                                                                                                                                                                                                                                                                                                                                                                                                                                                                                                                                                                                                                                                                                                                                                                                                                                                                                                                                                                                                                                                                                                                                                                                                                                                                                                                                                                                                                                                                                                                                                                                                                                                                                                                                                                                                                                                                                                                                                                                                                                                                                                                                                                                                                                                                                                                                                                                                                                                                                                                                                                                                                                                                                                                                                                                                                                                                                                                                                                                                                                                                                                                       |                                                                                                          |                                                                                                                            |                                                                                                                                                                                                                                                                                                                                                                                                                                                                                                                                                                                                                                                                                                                                                                                                                                           |                                                                                                                                       |
| see above                                                                                                                                                                                                                                                                                                                                                                                                                                                                                                                                                                                                                                                                                                                                                                                                                                                                                                                                                                                                                                                                                                                                                                                                                                                                                                                                                                                                                                                                                                                                                                                                                                                                                                                                                                                                                                                                                                                                                                                                                                                                                                                                                                                                                                                                                                                                                                                                                                                                                                                                                                                                                                                                                                                                                                                                                                                                                                                                                                                                                                                                                                                                                                                                                                                                                                                                                                                                                                                                                                                                                                                                                                                                                                                                                                                                                                                                                                                                                                                        | MRC/UVRI & LSHTM Uganda Research Unit, Central Public Health Laboratories                                | MRC/UVRI & LSHTM Uganda Research Unit, Central Public Health Laboratories                                                  |                                                                                                                                                                                                                                                                                                                                                                                                                                                                                                                                                                                                                                                                                                                                                                                                                                           | Dan Lule Bugembe; Isaac Sseeewanyana; Matthew Cotten; My V.T. Phan; Patrick Semanda; Pontiano Kaleebu; Susan Nabadda                  |
| EPI_ISL_1970565, EPI_ISL_1970566, EPI_ISL_1970567, EPI_ISL_1970568                                                                                                                                                                                                                                                                                                                                                                                                                                                                                                                                                                                                                                                                                                                                                                                                                                                                                                                                                                                                                                                                                                                                                                                                                                                                                                                                                                                                                                                                                                                                                                                                                                                                                                                                                                                                                                                                                                                                                                                                                                                                                                                                                                                                                                                                                                                                                                                                                                                                                                                                                                                                                                                                                                                                                                                                                                                                                                                                                                                                                                                                                                                                                                                                                                                                                                                                                                                                                                                                                                                                                                                                                                                                                                                                                                                                                                                                                                                               | MRC/UVRI & LSHTM Uganda Research Unit                                                                    | MRC/UVRI & LSHTM Uganda Research Unit                                                                                      |                                                                                                                                                                                                                                                                                                                                                                                                                                                                                                                                                                                                                                                                                                                                                                                                                                           | Dan Lule Bugembe; Isaac Sseeewanyana; Matthew Cotten; My V.T. Phan; Patrick Semanda; Pontiano Kaleebu; Susan Nabadda                  |
| EPI_ISL_954236, EPI_ISL_954239, EPI_ISL_1469319, EPI_ISL_1469324, EPI_ISL_1469337, EPI_ISL_1469381, EPI_ISL_1469382, EPI_ISL_1469385                                                                                                                                                                                                                                                                                                                                                                                                                                                                                                                                                                                                                                                                                                                                                                                                                                                                                                                                                                                                                                                                                                                                                                                                                                                                                                                                                                                                                                                                                                                                                                                                                                                                                                                                                                                                                                                                                                                                                                                                                                                                                                                                                                                                                                                                                                                                                                                                                                                                                                                                                                                                                                                                                                                                                                                                                                                                                                                                                                                                                                                                                                                                                                                                                                                                                                                                                                                                                                                                                                                                                                                                                                                                                                                                                                                                                                                             |                                                                                                          |                                                                                                                            |                                                                                                                                                                                                                                                                                                                                                                                                                                                                                                                                                                                                                                                                                                                                                                                                                                           |                                                                                                                                       |
| see above                                                                                                                                                                                                                                                                                                                                                                                                                                                                                                                                                                                                                                                                                                                                                                                                                                                                                                                                                                                                                                                                                                                                                                                                                                                                                                                                                                                                                                                                                                                                                                                                                                                                                                                                                                                                                                                                                                                                                                                                                                                                                                                                                                                                                                                                                                                                                                                                                                                                                                                                                                                                                                                                                                                                                                                                                                                                                                                                                                                                                                                                                                                                                                                                                                                                                                                                                                                                                                                                                                                                                                                                                                                                                                                                                                                                                                                                                                                                                                                        | MRC/UVRI & LSHTM Uganda Research Unit                                                                    | Where sequence data have been generated and submitted to GISAID                                                            |                                                                                                                                                                                                                                                                                                                                                                                                                                                                                                                                                                                                                                                                                                                                                                                                                                           | Dan Lule Bugembe; Isaac Sseeewanyana; Matthew Cotten; My V.T. Phan; Patrick Semanda; Pontiano Kaleebu; Susan Nabadda                  |
| EPI_ISL_2690446, EPI_ISL_2690447, EPI_ISL_2690448, EPI_ISL_2690449, EPI_ISL_2690450, EPI_ISL_2690451, EPI_ISL_2690452, EPI_ISL_2690456, EPI_ISL_2690457, EPI_ISL_2690458, EPI_ISL_2690459, EPI_ISL_2690460, EPI_ISL_2690461, EPI_ISL_2690462, EPI_ISL_2690463, EPI_ISL_2690485, EPI_ISL_2690496, EPI_ISL_2690500, EPI_ISL_2690513                                                                                                                                                                                                                                                                                                                                                                                                                                                                                                                                                                                                                                                                                                                                                                                                                                                                                                                                                                                                                                                                                                                                                                                                                                                                                                                                                                                                                                                                                                                                                                                                                                                                                                                                                                                                                                                                                                                                                                                                                                                                                                                                                                                                                                                                                                                                                                                                                                                                                                                                                                                                                                                                                                                                                                                                                                                                                                                                                                                                                                                                                                                                                                                                                                                                                                                                                                                                                                                                                                                                                                                                                                                                |                                                                                                          |                                                                                                                            |                                                                                                                                                                                                                                                                                                                                                                                                                                                                                                                                                                                                                                                                                                                                                                                                                                           |                                                                                                                                       |
| see above                                                                                                                                                                                                                                                                                                                                                                                                                                                                                                                                                                                                                                                                                                                                                                                                                                                                                                                                                                                                                                                                                                                                                                                                                                                                                                                                                                                                                                                                                                                                                                                                                                                                                                                                                                                                                                                                                                                                                                                                                                                                                                                                                                                                                                                                                                                                                                                                                                                                                                                                                                                                                                                                                                                                                                                                                                                                                                                                                                                                                                                                                                                                                                                                                                                                                                                                                                                                                                                                                                                                                                                                                                                                                                                                                                                                                                                                                                                                                                                        | MRC/UVRI & LSHTM Uganda Research Unit, Central Public Health Laboratories, Rakai Health Sciences Program | MRC/UVRI & LSHTM Uganda Research Unit, Central Public Health Laboratories                                                  |                                                                                                                                                                                                                                                                                                                                                                                                                                                                                                                                                                                                                                                                                                                                                                                                                                           | Dan Lule Bugembe; Hellen Nansumba; Isaac Sseeewanyana; Matthew Cotten; My V.T. Phan; Patrick Semanda; Pontiano Kaleebu; Susan Nabadda |
| EPI_ISL_2690464, EPI_ISL_2690465, EPI_ISL_2690466, EPI_ISL_2690467, EPI_ISL_2690468, EPI_ISL_2690469, EPI_ISL_2690470, EPI_ISL_2690471, EPI_ISL_2690472, EPI_ISL_2690473, EPI_ISL_2690474, EPI_ISL_2690475, EPI_ISL_2690476, EPI_ISL_2690477, EPI_ISL_2690478                                                                                                                                                                                                                                                                                                                                                                                                                                                                                                                                                                                                                                                                                                                                                                                                                                                                                                                                                                                                                                                                                                                                                                                                                                                                                                                                                                                                                                                                                                                                                                                                                                                                                                                                                                                                                                                                                                                                                                                                                                                                                                                                                                                                                                                                                                                                                                                                                                                                                                                                                                                                                                                                                                                                                                                                                                                                                                                                                                                                                                                                                                                                                                                                                                                                                                                                                                                                                                                                                                                                                                                                                                                                                                                                    |                                                                                                          |                                                                                                                            |                                                                                                                                                                                                                                                                                                                                                                                                                                                                                                                                                                                                                                                                                                                                                                                                                                           |                                                                                                                                       |
| see above                                                                                                                                                                                                                                                                                                                                                                                                                                                                                                                                                                                                                                                                                                                                                                                                                                                                                                                                                                                                                                                                                                                                                                                                                                                                                                                                                                                                                                                                                                                                                                                                                                                                                                                                                                                                                                                                                                                                                                                                                                                                                                                                                                                                                                                                                                                                                                                                                                                                                                                                                                                                                                                                                                                                                                                                                                                                                                                                                                                                                                                                                                                                                                                                                                                                                                                                                                                                                                                                                                                                                                                                                                                                                                                                                                                                                                                                                                                                                                                        | MRC/UVRI & LSHTM Uganda Research Unit, Central Public Health Laboratories, Rakai Health Sciences Program | MRC/UVRI & LSHTM Uganda Research Unit, Rakai Health Sciences Program                                                       |                                                                                                                                                                                                                                                                                                                                                                                                                                                                                                                                                                                                                                                                                                                                                                                                                                           | Charles Ssuuna; Dan Lule Bugembe; Matthew Cotten; My V.T. Phan; Pontiano Kaleebu; Ronald Moses Galiwango; Steven J Reynolds           |
| EPI_ISL_428857, EPI_ISL_471158, EPI_ISL_471160, EPI_ISL_471166, EPI_ISL_561027, EPI_ISL_561085, EPI_ISL_561218, EPI_ISL_1216072, EPI_ISL_1216077, EPI_ISL_1216118, EPI_ISL_1234526, EPI_ISL_1234531, EPI_ISL_1731549, EPI_ISL_1731557, EPI_ISL_2147249, EPI_ISL_2820697, EPI_ISL_2941560, EPI_ISL_2958626, EPI_ISL_2958629, EPI_ISL_2958631, EPI_ISL_2958632, EPI_ISL_2958636                                                                                                                                                                                                                                                                                                                                                                                                                                                                                                                                                                                                                                                                                                                                                                                                                                                                                                                                                                                                                                                                                                                                                                                                                                                                                                                                                                                                                                                                                                                                                                                                                                                                                                                                                                                                                                                                                                                                                                                                                                                                                                                                                                                                                                                                                                                                                                                                                                                                                                                                                                                                                                                                                                                                                                                                                                                                                                                                                                                                                                                                                                                                                                                                                                                                                                                                                                                                                                                                                                                                                                                                                    |                                                                                                          |                                                                                                                            |                                                                                                                                                                                                                                                                                                                                                                                                                                                                                                                                                                                                                                                                                                                                                                                                                                           |                                                                                                                                       |
| see above                                                                                                                                                                                                                                                                                                                                                                                                                                                                                                                                                                                                                                                                                                                                                                                                                                                                                                                                                                                                                                                                                                                                                                                                                                                                                                                                                                                                                                                                                                                                                                                                                                                                                                                                                                                                                                                                                                                                                                                                                                                                                                                                                                                                                                                                                                                                                                                                                                                                                                                                                                                                                                                                                                                                                                                                                                                                                                                                                                                                                                                                                                                                                                                                                                                                                                                                                                                                                                                                                                                                                                                                                                                                                                                                                                                                                                                                                                                                                                                        | MRCG at LSHTM Genomics lab                                                                               | MRCG at LSHTM Genomics lab                                                                                                 | Abdoulie Kante; Abdul Karim sesay; Bakary Sanyang; Dabiri Damilari; Damiri Damilari; Jarra Manneh; Mariama Kujabi; Sainabou laye Ndure; Peter et al                                                                                                                                                                                                                                                                                                                                                                                                                                                                                                                                                                                                                                                                                       |                                                                                                                                       |
| EPI_ISL_930937                                                                                                                                                                                                                                                                                                                                                                                                                                                                                                                                                                                                                                                                                                                                                                                                                                                                                                                                                                                                                                                                                                                                                                                                                                                                                                                                                                                                                                                                                                                                                                                                                                                                                                                                                                                                                                                                                                                                                                                                                                                                                                                                                                                                                                                                                                                                                                                                                                                                                                                                                                                                                                                                                                                                                                                                                                                                                                                                                                                                                                                                                                                                                                                                                                                                                                                                                                                                                                                                                                                                                                                                                                                                                                                                                                                                                                                                                                                                                                                   | MS Public Health Laboratory                                                                              | Genomics and Discovery, Respiratory Viruses Branch, Division of Viral Diseases, Centers for Disease Control and Prevention | Anna Montmayeur; Anna Uehara; Ben L. Rambo-Martin; Clinton R. Paden; Dhvani Batra; Haibin Wang; Jasmine Padilla; Jing Zhang; Justin Lee; Krista Queen; Lori Rowe; Mark Burroughs; Mili Sheth; Suxiang Tong; Yan Li; Ying Tao                                                                                                                                                                                                                                                                                                                                                                                                                                                                                                                                                                                                              |                                                                                                                                       |
| EPI_ISL_2224388, EPI_ISL_2920904                                                                                                                                                                                                                                                                                                                                                                                                                                                                                                                                                                                                                                                                                                                                                                                                                                                                                                                                                                                                                                                                                                                                                                                                                                                                                                                                                                                                                                                                                                                                                                                                                                                                                                                                                                                                                                                                                                                                                                                                                                                                                                                                                                                                                                                                                                                                                                                                                                                                                                                                                                                                                                                                                                                                                                                                                                                                                                                                                                                                                                                                                                                                                                                                                                                                                                                                                                                                                                                                                                                                                                                                                                                                                                                                                                                                                                                                                                                                                                 | MS Public Health Laboratory                                                                              | University of Mississippi Medical Center, Molecular and Genomics Core Facility                                             |                                                                                                                                                                                                                                                                                                                                                                                                                                                                                                                                                                                                                                                                                                                                                                                                                                           | Ashley C. Johnson; D. Ashley Robinson; Ithiel J. Frame; Krishna K. Ayyalasomayajula; Michael R. Garrett; Wenjie Wu                    |
| EPI_ISL_802148, EPI_ISL_1300812, EPI_ISL_1300813, EPI_ISL_1301126                                                                                                                                                                                                                                                                                                                                                                                                                                                                                                                                                                                                                                                                                                                                                                                                                                                                                                                                                                                                                                                                                                                                                                                                                                                                                                                                                                                                                                                                                                                                                                                                                                                                                                                                                                                                                                                                                                                                                                                                                                                                                                                                                                                                                                                                                                                                                                                                                                                                                                                                                                                                                                                                                                                                                                                                                                                                                                                                                                                                                                                                                                                                                                                                                                                                                                                                                                                                                                                                                                                                                                                                                                                                                                                                                                                                                                                                                                                                | MSHS Clinical Microbiology Laboratories                                                                  | MSHS Pathogen Surveillance Program                                                                                         | Adolfo García-Sastre; Adriana van de Guchte; Ajay Obla; Alberto Paniz-Mondolfi; Ana S. Gonzalez-Reiche; Andrew Kasarskis; Angela Amoako; Ashley S. Salimbanang; Ashley Salimbanang; Betsaida Salom Melo; Bremy Alburquerque; Brianne Ciferri; Charles Gleason; Daniel Floda; Deena R. Altman; Denise Jurczyk; Elena Hirsch; Emilia Mia Sordillo; Emily Ferrer; Gintaras Deikus; Giulio Klein; Gopi Patel; Hala Alshammary; Harm van Bavel; Inna Oussenko; Jayeta Dutta; Juan Sto; Julia Matthews; Katherine Beach; Kathryn Tryman; Kayla Russo; Komal Srivastava; Levy Sominsky; Mahmoud Awawda; Marta Lukasz; Matthew M. Hernandez; Melissa Gitman; Michael D. Nowak; Mitchell J. Sullivan; Nancy Francoeur; Rachel Chernet; Robert Sebra; Sarah Schaefer; Shelcie Fabre; Swetha Hara Sridhar; Viviana Simon; Ying-Chih Wang; Zenab Khan |                                                                                                                                       |
| EPI_ISL_2690428                                                                                                                                                                                                                                                                                                                                                                                                                                                                                                                                                                                                                                                                                                                                                                                                                                                                                                                                                                                                                                                                                                                                                                                                                                                                                                                                                                                                                                                                                                                                                                                                                                                                                                                                                                                                                                                                                                                                                                                                                                                                                                                                                                                                                                                                                                                                                                                                                                                                                                                                                                                                                                                                                                                                                                                                                                                                                                                                                                                                                                                                                                                                                                                                                                                                                                                                                                                                                                                                                                                                                                                                                                                                                                                                                                                                                                                                                                                                                                                  | MSK Microbiology Lab                                                                                     | MSK Microbiology Lab                                                                                                       |                                                                                                                                                                                                                                                                                                                                                                                                                                                                                                                                                                                                                                                                                                                                                                                                                                           | Esther Babady; Krupa Jani; Tracy McMillen                                                                                             |
| EPI_ISL_1722072, EPI_ISL_1722136                                                                                                                                                                                                                                                                                                                                                                                                                                                                                                                                                                                                                                                                                                                                                                                                                                                                                                                                                                                                                                                                                                                                                                                                                                                                                                                                                                                                                                                                                                                                                                                                                                                                                                                                                                                                                                                                                                                                                                                                                                                                                                                                                                                                                                                                                                                                                                                                                                                                                                                                                                                                                                                                                                                                                                                                                                                                                                                                                                                                                                                                                                                                                                                                                                                                                                                                                                                                                                                                                                                                                                                                                                                                                                                                                                                                                                                                                                                                                                 | MVZ Labor Dr. Fenner und Kollegen (Standort Hamburg)                                                     | Robert Koch Institute                                                                                                      |                                                                                                                                                                                                                                                                                                                                                                                                                                                                                                                                                                                                                                                                                                                                                                                                                                           |                                                                                                                                       |
| EPI_ISL_2261223                                                                                                                                                                                                                                                                                                                                                                                                                                                                                                                                                                                                                                                                                                                                                                                                                                                                                                                                                                                                                                                                                                                                                                                                                                                                                                                                                                                                                                                                                                                                                                                                                                                                                                                                                                                                                                                                                                                                                                                                                                                                                                                                                                                                                                                                                                                                                                                                                                                                                                                                                                                                                                                                                                                                                                                                                                                                                                                                                                                                                                                                                                                                                                                                                                                                                                                                                                                                                                                                                                                                                                                                                                                                                                                                                                                                                                                                                                                                                                                  | MVZ Labor Dr. Quade & Kollegen GmbH                                                                      | Robert Koch Institute                                                                                                      |                                                                                                                                                                                                                                                                                                                                                                                                                                                                                                                                                                                                                                                                                                                                                                                                                                           |                                                                                                                                       |
| EPI_ISL_2636786, EPI_ISL_3044511                                                                                                                                                                                                                                                                                                                                                                                                                                                                                                                                                                                                                                                                                                                                                                                                                                                                                                                                                                                                                                                                                                                                                                                                                                                                                                                                                                                                                                                                                                                                                                                                                                                                                                                                                                                                                                                                                                                                                                                                                                                                                                                                                                                                                                                                                                                                                                                                                                                                                                                                                                                                                                                                                                                                                                                                                                                                                                                                                                                                                                                                                                                                                                                                                                                                                                                                                                                                                                                                                                                                                                                                                                                                                                                                                                                                                                                                                                                                                                 | MVZ Labor Krone GbR                                                                                      | Robert Koch Institute                                                                                                      |                                                                                                                                                                                                                                                                                                                                                                                                                                                                                                                                                                                                                                                                                                                                                                                                                                           |                                                                                                                                       |
| EPI_ISL_2314763                                                                                                                                                                                                                                                                                                                                                                                                                                                                                                                                                                                                                                                                                                                                                                                                                                                                                                                                                                                                                                                                                                                                                                                                                                                                                                                                                                                                                                                                                                                                                                                                                                                                                                                                                                                                                                                                                                                                                                                                                                                                                                                                                                                                                                                                                                                                                                                                                                                                                                                                                                                                                                                                                                                                                                                                                                                                                                                                                                                                                                                                                                                                                                                                                                                                                                                                                                                                                                                                                                                                                                                                                                                                                                                                                                                                                                                                                                                                                                                  | MVZ Medizinisches Labor Hannover GmbH                                                                    | Robert Koch Institute                                                                                                      |                                                                                                                                                                                                                                                                                                                                                                                                                                                                                                                                                                                                                                                                                                                                                                                                                                           |                                                                                                                                       |
| EPI_ISL_1936102, EPI_ISL_1936103, EPI_ISL_1936104, EPI_ISL_1936105, EPI_ISL_1936106, EPI_ISL_1936107, EPI_ISL_1936108, EPI_ISL_1936109, EPI_ISL_1936110, EPI_ISL_1936111, EPI_ISL_1936112, EPI_ISL_1936113, EPI_ISL_1936114, EPI_ISL_1936115, EPI_ISL_1936116, EPI_ISL_1936117, EPI_ISL_1936118, EPI_ISL_1936119, EPI_ISL_1936120, EPI_ISL_1936121, EPI_ISL_1936122, EPI_ISL_1936123, EPI_ISL_1936124, EPI_ISL_1936125, EPI_ISL_1936126, EPI_ISL_1936127, EPI_ISL_1936128, EPI_ISL_1936129, EPI_ISL_1936130, EPI_ISL_1936131, EPI_ISL_1936132, EPI_ISL_1936133, EPI_ISL_1936134, EPI_ISL_1936135, EPI_ISL_1936136, EPI_ISL_1936137, EPI_ISL_1936138, EPI_ISL_1936139, EPI_ISL_1936140, EPI_ISL_1936141, EPI_ISL_1936142, EPI_ISL_1936143, EPI_ISL_1936144, EPI_ISL_1936145, EPI_ISL_1936194, EPI_ISL_1936195, EPI_ISL_1936196, EPI_ISL_1936197, EPI_ISL_1936198, EPI_ISL_1936199, EPI_ISL_1936200, EPI_ISL_1936201, EPI_ISL_1936202, EPI_ISL_1936203, EPI_ISL_1936204, EPI_ISL_1936205, EPI_ISL_1936206, EPI_ISL_1936207, EPI_ISL_1936208, EPI_ISL_1936209, EPI_ISL_1936210, EPI_ISL_1936211, EPI_ISL_1936212, EPI_ISL_1936213, EPI_ISL_1936214, EPI_ISL_1936215, EPI_ISL_1936216, EPI_ISL_1936218, EPI_ISL_1936219, EPI_ISL_1936220, EPI_ISL_1936221, EPI_ISL_1936222, EPI_ISL_1936223, EPI_ISL_1936224, EPI_ISL_1936225, EPI_ISL_1936226, EPI_ISL_1936227, EPI_ISL_1936228, EPI_ISL_1936229, EPI_ISL_1936230, EPI_ISL_1936231, EPI_ISL_1936232, EPI_ISL_1936233, EPI_ISL_1936234, EPI_ISL_1936235, EPI_ISL_1936236, EPI_ISL_1936237, EPI_ISL_1936240, EPI_ISL_1936241, EPI_ISL_1936242, EPI_ISL_1936243, EPI_ISL_1936244, EPI_ISL_1936245, EPI_ISL_1936246, EPI_ISL_1936247, EPI_ISL_1936248, EPI_ISL_1936249, EPI_ISL_1936250, EPI_ISL_1936251, EPI_ISL_1936252, EPI_ISL_1936253, EPI_ISL_1936254, EPI_ISL_1936255, EPI_ISL_1936256, EPI_ISL_1936257, EPI_ISL_1936258, EPI_ISL_1936259, EPI_ISL_1936260, EPI_ISL_1936261, EPI_ISL_1936262, EPI_ISL_1936263, EPI_ISL_1936264, EPI_ISL_1936265, EPI_ISL_1936266, EPI_ISL_1936267, EPI_ISL_1936268, EPI_ISL_1936269, EPI_ISL_1936270, EPI_ISL_1936271, EPI_ISL_1936272, EPI_ISL_1936273, EPI_ISL_1936274, EPI_ISL_1936275, EPI_ISL_1936276, EPI_ISL_1936277, EPI_ISL_1936278, EPI_ISL_1936279, EPI_ISL_1936280, EPI_ISL_1936281, EPI_ISL_1936282, EPI_ISL_1936283, EPI_ISL_1936284, EPI_ISL_1936285, EPI_ISL_1936286, EPI_ISL_1936287, EPI_ISL_1936288, EPI_ISL_1936289, EPI_ISL_1936290, EPI_ISL_1936291, EPI_ISL_1936292, EPI_ISL_1936293, EPI_ISL_1936294, EPI_ISL_1936295, EPI_ISL_1936296, EPI_ISL_1936297, EPI_ISL_1936298, EPI_ISL_1936299, EPI_ISL_1936300, EPI_ISL_1936301, EPI_ISL_1936302, EPI_ISL_1936303, EPI_ISL_1936304, EPI_ISL_1936305, EPI_ISL_1936306, EPI_ISL_1936307, EPI_ISL_1936308, EPI_ISL_1936309, EPI_ISL_1936310, EPI_ISL_1936311, EPI_ISL_1936312, EPI_ISL_1936313, EPI_ISL_1936314, EPI_ISL_1936315, EPI_ISL_1936316, EPI_ISL_1936317, EPI_ISL_1936318, EPI_ISL_1936319, EPI_ISL_1936320, EPI_ISL_1936321, EPI_ISL_1936322, EPI_ISL_1936323, EPI_ISL_1936324, EPI_ISL_1936325, EPI_ISL_1936326, EPI_ISL_1936327, EPI_ISL_1936328, EPI_ISL_1936329, EPI_ISL_1936330, EPI_ISL_1936331, EPI_ISL_1936332, EPI_ISL_1936333, EPI_ISL_1936334, EPI_ISL_1936335, EPI_ISL_1936336, EPI_ISL_1936337, EPI_ISL_1936338, EPI_ISL_1936339, EPI_ISL_1936340, EPI_ISL_1936341, EPI_ISL_1936342, EPI_ISL_1936343, EPI_ISL_1936344, EPI_ISL_1936345, EPI_ISL_1936346, EPI_ISL_1936347, EPI_ISL_1936348, EPI_ISL_1936349, EPI_ISL_1936350, EPI_ISL_1936351, EPI_ISL_1936352, EPI_ISL_1936353, EPI_ISL_1936354, EPI_ISL_1936355, EPI_ISL_1936356, EPI_ISL_1936357, EPI_ISL_1936358, EPI_ISL_1936359, EPI_ISL_1936360, EPI_ISL_1936361, EPI_ISL_1936362, EPI_ISL_1936363, EPI_ISL_1936364, EPI_ISL_1936365, EPI_ISL_1936366, EPI_ISL_1936367, EPI_ISL_1936368, EPI_ISL_1936369, EPI_ISL_1936370, EPI_ISL_1936371, EPI_ISL_1936372, EPI_ISL_1936373, EPI_ISL_1936374, EPI_ISL_1969078, EPI_ISL_1969079, EPI_ISL_1969080, EPI_ISL_1969081 |                                                                                                          |                                                                                                                            |                                                                                                                                                                                                                                                                                                                                                                                                                                                                                                                                                                                                                                                                                                                                                                                                                                           |                                                                                                                                       |
| see above                                                                                                                                                                                                                                                                                                                                                                                                                                                                                                                                                                                                                                                                                                                                                                                                                                                                                                                                                                                                                                                                                                                                                                                                                                                                                                                                                                                                                                                                                                                                                                                                                                                                                                                                                                                                                                                                                                                                                                                                                                                                                                                                                                                                                                                                                                                                                                                                                                                                                                                                                                                                                                                                                                                                                                                                                                                                                                                                                                                                                                                                                                                                                                                                                                                                                                                                                                                                                                                                                                                                                                                                                                                                                                                                                                                                                                                                                                                                                                                        | Main Chemical Laboratories Egypt Army                                                                    | Main Chemical Laboratories Egypt Army                                                                                      | Abdullah Salama; AbedErahman Zekri; Ahmed Gad; Bassem Elharty; Laila Elsayw; Mervat Hassan; Mohamed Abdel-Monem; Mohamed El-Elaw; Mohamed Seadawy; Mohamed Shamel; Mostfa Elhoseiny; Mostfa Yakout; Ola Eiroby; Sabah Ahmed; Sherine Helmy                                                                                                                                                                                                                                                                                                                                                                                                                                                                                                                                                                                                |                                                                                                                                       |
| EPI_ISL_2647352, EPI_ISL_2875445                                                                                                                                                                                                                                                                                                                                                                                                                                                                                                                                                                                                                                                                                                                                                                                                                                                                                                                                                                                                                                                                                                                                                                                                                                                                                                                                                                                                                                                                                                                                                                                                                                                                                                                                                                                                                                                                                                                                                                                                                                                                                                                                                                                                                                                                                                                                                                                                                                                                                                                                                                                                                                                                                                                                                                                                                                                                                                                                                                                                                                                                                                                                                                                                                                                                                                                                                                                                                                                                                                                                                                                                                                                                                                                                                                                                                                                                                                                                                                 | Mako Medical                                                                                             | Centers for Disease Control and Prevention Division of Viral Diseases, Pathogen Discovery                                  | Adrian Paskey; Benjamin Rambo-Martin; Christopher Gulvick; Clinton R. Paden; Dakota Howard; Darlene Wagner; Dhvani Batra; Duncan MacCannell; Jason Caravas; Kara Moser; Lauren Moon; Matthew Schmerer; Matthew Tugwell; Peter W. Cook; Scott Sammons; Shatavia Morrison; Yvette Unourumhi                                                                                                                                                                                                                                                                                                                                                                                                                                                                                                                                                 |                                                                                                                                       |
| EPI_ISL_582124                                                                                                                                                                                                                                                                                                                                                                                                                                                                                                                                                                                                                                                                                                                                                                                                                                                                                                                                                                                                                                                                                                                                                                                                                                                                                                                                                                                                                                                                                                                                                                                                                                                                                                                                                                                                                                                                                                                                                                                                                                                                                                                                                                                                                                                                                                                                                                                                                                                                                                                                                                                                                                                                                                                                                                                                                                                                                                                                                                                                                                                                                                                                                                                                                                                                                                                                                                                                                                                                                                                                                                                                                                                                                                                                                                                                                                                                                                                                                                                   | Malaysia Genome Institute                                                                                | Malaysia Genome Institute                                                                                                  | Azrin Ahmad; Enizza Kasim; Iri Suhayu Sapian; Mohd Faizal Abu Bakar; Mohd Nor Mat Isa; Nor Azfa Johari; Nurhezreen Ma Iqbal; Shahrul Hisham Zainal Ariffin; Shamsidar; Sophie; Siti Noraini Othman; Yusuf Muhammad Nor                                                                                                                                                                                                                                                                                                                                                                                                                                                                                                                                                                                                                    |                                                                                                                                       |
| EPI_ISL_1827700                                                                                                                                                                                                                                                                                                                                                                                                                                                                                                                                                                                                                                                                                                                                                                                                                                                                                                                                                                                                                                                                                                                                                                                                                                                                                                                                                                                                                                                                                                                                                                                                                                                                                                                                                                                                                                                                                                                                                                                                                                                                                                                                                                                                                                                                                                                                                                                                                                                                                                                                                                                                                                                                                                                                                                                                                                                                                                                                                                                                                                                                                                                                                                                                                                                                                                                                                                                                                                                                                                                                                                                                                                                                                                                                                                                                                                                                                                                                                                                  | Manzana                                                                                                  | National Institute for Communicable Diseases of the National Health Laboratory Service                                     |                                                                                                                                                                                                                                                                                                                                                                                                                                                                                                                                                                                                                                                                                                                                                                                                                                           | Amoako DG; Bhiman JN; Ismail A; Mahlangu B; Mahpalala G; Mohale T; Ntuli N; Scheepers C                                               |
| EPI_ISL_2373638                                                                                                                                                                                                                                                                                                                                                                                                                                                                                                                                                                                                                                                                                                                                                                                                                                                                                                                                                                                                                                                                                                                                                                                                                                                                                                                                                                                                                                                                                                                                                                                                                                                                                                                                                                                                                                                                                                                                                                                                                                                                                                                                                                                                                                                                                                                                                                                                                                                                                                                                                                                                                                                                                                                                                                                                                                                                                                                                                                                                                                                                                                                                                                                                                                                                                                                                                                                                                                                                                                                                                                                                                                                                                                                                                                                                                                                                                                                                                                                  | Mapmygenome                                                                                              | CSIR-Centre for Cellular and Molecular Biology - INSACOG                                                                   | Amreshwar Vodapalli; Ara Sreenivas; B Himasri; Divya Tej Sowpatti; Karthik Bharadwaj Tallapaka; Lamuk Zaveri; Onkar Kulkarni; Rakesh K Mishra; Sharath Chandra Thota; Shreekant Verma; Sofia Banu; Viswagithe S L                                                                                                                                                                                                                                                                                                                                                                                                                                                                                                                                                                                                                         |                                                                                                                                       |
| EPI_ISL_1910606, EPI_ISL_1910607, EPI_ISL_1910617, EPI_ISL_1913025                                                                                                                                                                                                                                                                                                                                                                                                                                                                                                                                                                                                                                                                                                                                                                                                                                                                                                                                                                                                                                                                                                                                                                                                                                                                                                                                                                                                                                                                                                                                                                                                                                                                                                                                                                                                                                                                                                                                                                                                                                                                                                                                                                                                                                                                                                                                                                                                                                                                                                                                                                                                                                                                                                                                                                                                                                                                                                                                                                                                                                                                                                                                                                                                                                                                                                                                                                                                                                                                                                                                                                                                                                                                                                                                                                                                                                                                                                                               | Mashrek Medical Diagnostic Center                                                                        | Microbial Pathogenomics Lab - LAU                                                                                          | Georgi Merhi; Jad Koweyes; Sima Tokajian; Tamara Salloum                                                                                                                                                                                                                                                                                                                                                                                                                                                                                                                                                                                                                                                                                                                                                                                  |                                                                                                                                       |
| EPI_ISL_692915                                                                                                                                                                                                                                                                                                                                                                                                                                                                                                                                                                                                                                                                                                                                                                                                                                                                                                                                                                                                                                                                                                                                                                                                                                                                                                                                                                                                                                                                                                                                                                                                                                                                                                                                                                                                                                                                                                                                                                                                                                                                                                                                                                                                                                                                                                                                                                                                                                                                                                                                                                                                                                                                                                                                                                                                                                                                                                                                                                                                                                                                                                                                                                                                                                                                                                                                                                                                                                                                                                                                                                                                                                                                                                                                                                                                                                                                                                                                                                                   | Massachusetts State Public Health Laboratory                                                             | Massachusetts State Public Health Laboratory                                                                               |                                                                                                                                                                                                                                                                                                                                                                                                                                                                                                                                                                                                                                                                                                                                                                                                                                           | Andrew Lang; Glen Gallagher; Sandra Smole; Timelia Fink                                                                               |

|                                                                                                                                                                                                                                                                                                                                                                                                                                                                                                                                                                                                                                                                                                                                                                                                                                           |                                                                                                                                                |                                                                                                                                                                                                                                                                                                                                                                                                                                                                                                                                   |                                                                                                                                                                                                                                                                                                                                                                                                                                                                                                                                                          |
|-------------------------------------------------------------------------------------------------------------------------------------------------------------------------------------------------------------------------------------------------------------------------------------------------------------------------------------------------------------------------------------------------------------------------------------------------------------------------------------------------------------------------------------------------------------------------------------------------------------------------------------------------------------------------------------------------------------------------------------------------------------------------------------------------------------------------------------------|------------------------------------------------------------------------------------------------------------------------------------------------|-----------------------------------------------------------------------------------------------------------------------------------------------------------------------------------------------------------------------------------------------------------------------------------------------------------------------------------------------------------------------------------------------------------------------------------------------------------------------------------------------------------------------------------|----------------------------------------------------------------------------------------------------------------------------------------------------------------------------------------------------------------------------------------------------------------------------------------------------------------------------------------------------------------------------------------------------------------------------------------------------------------------------------------------------------------------------------------------------------|
| EPI_ISL_2547344                                                                                                                                                                                                                                                                                                                                                                                                                                                                                                                                                                                                                                                                                                                                                                                                                           | Matjieskloof Clinic                                                                                                                            | National Health Laboratory Service/University of Cape Town (NHLS/UUCT)                                                                                                                                                                                                                                                                                                                                                                                                                                                            | Arash Iranzadeh; Bruna Galvao; Carolyn Williamson; Deelan Doolabh; Diana Hardie; Gert Marais; Innocent Mudau; Lynn Tyers; Marvin Hsiao; Stephen Korsman                                                                                                                                                                                                                                                                                                                                                                                                  |
| EPI_ISL_1196004                                                                                                                                                                                                                                                                                                                                                                                                                                                                                                                                                                                                                                                                                                                                                                                                                           | Mbabane PHU                                                                                                                                    | National Institute for Communicable Diseases of the National Health Laboratory Service                                                                                                                                                                                                                                                                                                                                                                                                                                            | Amoako DG; Bhiman JN; Ismail A; Mahlangu B; Maphalala GP; Mohale T; Ntuli N; Scheepers C                                                                                                                                                                                                                                                                                                                                                                                                                                                                 |
| EPI_ISL_1722079, EPI_ISL_2110393, EPI_ISL_2260594                                                                                                                                                                                                                                                                                                                                                                                                                                                                                                                                                                                                                                                                                                                                                                                         | Med. Labor Prof. Schenk Dr. Ansoerge & Kollegen                                                                                                | Robert Koch Institute                                                                                                                                                                                                                                                                                                                                                                                                                                                                                                             |                                                                                                                                                                                                                                                                                                                                                                                                                                                                                                                                                          |
| EPI_ISL_456378                                                                                                                                                                                                                                                                                                                                                                                                                                                                                                                                                                                                                                                                                                                                                                                                                            | MedLab Central Ltd                                                                                                                             | Institute of Environmental Science and Research (ESR)                                                                                                                                                                                                                                                                                                                                                                                                                                                                             | Anja Werno; Antje van der Linden; Arlo Upton; Chris Mansell; David Hammer; Dragana Drinkovic; Erasmus Smit; Gary McAuliffe; Hana Sofia Andersson; James Usher; Jill Sherwood; Joep de Lig; Josh Freeman; Julia Howard; Juliet Elvy; Lauren Jelly; Mary DeAlmeida; Matt Blakiston; Matt Storey; Matthew Rogers; Max Bloomfield; Michael Addide; Michelle Balm; Sally Roberts; Sarah Jefferies; Sharmini Muttaiyah; Susan Morpeth; Susan Taylor; Timothy Blackmore; Vani Sathyendran; Veronica Playle; Virginia Hope; Xiaoyun Ren                          |
| EPI_ISL_475745, EPI_ISL_475746, EPI_ISL_475747, EPI_ISL_475748, EPI_ISL_475749, EPI_ISL_475750, EPI_ISL_475751, EPI_ISL_475752, EPI_ISL_475753, EPI_ISL_482759, EPI_ISL_482760, EPI_ISL_482761, EPI_ISL_482762, EPI_ISL_482763, EPI_ISL_482764, EPI_ISL_482765, EPI_ISL_482766, EPI_ISL_482767, EPI_ISL_482768, EPI_ISL_482769, EPI_ISL_482770, EPI_ISL_482771, EPI_ISL_482772, EPI_ISL_482773, EPI_ISL_482774, EPI_ISL_482775, EPI_ISL_483035, EPI_ISL_483036, EPI_ISL_483037, EPI_ISL_483038, EPI_ISL_1098839, EPI_ISL_109484, EPI_ISL_109485, EPI_ISL_109486, EPI_ISL_109624, EPI_ISL_109626, EPI_ISL_109627, EPI_ISL_109628, EPI_ISL_109629, EPI_ISL_109630, EPI_ISL_1141525, EPI_ISL_1165078, EPI_ISL_1165079, EPI_ISL_1165080, EPI_ISL_1165082, EPI_ISL_1165083, EPI_ISL_1165087, EPI_ISL_1167189, EPI_ISL_1167193, EPI_ISL_1586895 |                                                                                                                                                | Ahmad Moustafa; Ashraf Omar; Aya Mohamed; Fatma Ebied; Ghada Ismael; Hagar Elshora; Hala Hafez; Hesham Elghazaly; Hoda Abd Elisatar; Hoda Ezz Elarab; Iman Foda; Mahmoud Elmeitini; Mahmoud Elmeteni; Manal Hamdy Elsaïd; Mohamed Elhadidi; Osama Mansour; Osama Mansour.; Reham Kassa; Reham Mamdouh; Samia Abdo; Samia Abdou Giris; Sara Elnaakep; Sara Hassan Agwa; Shaimaa Moustafa; Shimaa Moustafa                                                                                                                          |                                                                                                                                                                                                                                                                                                                                                                                                                                                                                                                                                          |
| see above                                                                                                                                                                                                                                                                                                                                                                                                                                                                                                                                                                                                                                                                                                                                                                                                                                 | Medical Ain Shams Research Institute (MASRI), Ain Shams University                                                                             | Medical Ain Shams Research Institute (MASRI), Ain Shams University                                                                                                                                                                                                                                                                                                                                                                                                                                                                |                                                                                                                                                                                                                                                                                                                                                                                                                                                                                                                                                          |
| EPI_ISL_873164, EPI_ISL_2107508, EPI_ISL_2107509, EPI_ISL_2107510, EPI_ISL_2107511, EPI_ISL_2107512, EPI_ISL_2107524                                                                                                                                                                                                                                                                                                                                                                                                                                                                                                                                                                                                                                                                                                                      |                                                                                                                                                |                                                                                                                                                                                                                                                                                                                                                                                                                                                                                                                                   |                                                                                                                                                                                                                                                                                                                                                                                                                                                                                                                                                          |
| see above                                                                                                                                                                                                                                                                                                                                                                                                                                                                                                                                                                                                                                                                                                                                                                                                                                 | Medical Laboratory Sciences, Arab American University                                                                                          | Medical Laboratory Sciences, Arab American University                                                                                                                                                                                                                                                                                                                                                                                                                                                                             | Al-Jawabreh, A.; Al-Jawabreh, H.; Dumaidi, K.; Dumaidi, k.; Ereqat, S.; Nasereddin, A.                                                                                                                                                                                                                                                                                                                                                                                                                                                                   |
| EPI_ISL_882646                                                                                                                                                                                                                                                                                                                                                                                                                                                                                                                                                                                                                                                                                                                                                                                                                            | Medical Research Center, Faculty of Medicine, Syarif Hidayatullah State Islamic University Jakarta                                             | Medical Research Center, Faculty of Medicine, Syarif Hidayatullah State Islamic University Jakarta                                                                                                                                                                                                                                                                                                                                                                                                                                | Chris Adhianto; Endah Wulandari; Fika Ekayanti; Flori Ratna Sari; Hari Hendarto; Laifa Hendarmin; Zeti Harriyati                                                                                                                                                                                                                                                                                                                                                                                                                                         |
| EPI_ISL_581457                                                                                                                                                                                                                                                                                                                                                                                                                                                                                                                                                                                                                                                                                                                                                                                                                            | Medizinische Klinik Innere Medizin I, Universitätsklinikum Tübingen                                                                            | NGS Competence Center Tübingen, Institut für Medizinische Mikrobiologie und Hygiene, Universitätsklinikum Tübingen                                                                                                                                                                                                                                                                                                                                                                                                                | Angel Angelov                                                                                                                                                                                                                                                                                                                                                                                                                                                                                                                                            |
| EPI_ISL_1726791                                                                                                                                                                                                                                                                                                                                                                                                                                                                                                                                                                                                                                                                                                                                                                                                                           | Medizinisches Labor Wahl LÄ&denscheid                                                                                                          | Robert Koch Institute                                                                                                                                                                                                                                                                                                                                                                                                                                                                                                             |                                                                                                                                                                                                                                                                                                                                                                                                                                                                                                                                                          |
| EPI_ISL_1722630                                                                                                                                                                                                                                                                                                                                                                                                                                                                                                                                                                                                                                                                                                                                                                                                                           | Medizinisches Zentrallabor Altenburg GmbH & Co.KG                                                                                              | Robert Koch Institute                                                                                                                                                                                                                                                                                                                                                                                                                                                                                                             |                                                                                                                                                                                                                                                                                                                                                                                                                                                                                                                                                          |
| EPI_ISL_1158449                                                                                                                                                                                                                                                                                                                                                                                                                                                                                                                                                                                                                                                                                                                                                                                                                           | Michigan Department of Health and Human Services, Bureau of Laboratories                                                                       | Michigan Department of Health and Human Services, Bureau of Laboratories                                                                                                                                                                                                                                                                                                                                                                                                                                                          | Blankenship HM; Riner D; Soehnlén MK                                                                                                                                                                                                                                                                                                                                                                                                                                                                                                                     |
| EPI_ISL_426477                                                                                                                                                                                                                                                                                                                                                                                                                                                                                                                                                                                                                                                                                                                                                                                                                            | Microbial Genomics Laboratory, Institut Pasteur Montevideo                                                                                     | Microbial Genomics Laboratory, Institut Pasteur Montevideo, Uruguay                                                                                                                                                                                                                                                                                                                                                                                                                                                               | Cecilia Salazar; Florencia Díaz-Viraqué; Gonzalo Moratorio; Gregorio Iraola; Marianoel Pereira; Pilar Moreno                                                                                                                                                                                                                                                                                                                                                                                                                                             |
| EPI_ISL_480346                                                                                                                                                                                                                                                                                                                                                                                                                                                                                                                                                                                                                                                                                                                                                                                                                            | Microbial Genomics Laboratory, Institut Pasteur de Montevideo                                                                                  | Microbial Genomics Laboratory, Institut Pasteur de Montevideo                                                                                                                                                                                                                                                                                                                                                                                                                                                                     | Cecilia Salazar; Gonzalo Moratorio; Gregorio Iraola; Ignacio Ferrés; Marianoel Pereira; Pilar Moreno                                                                                                                                                                                                                                                                                                                                                                                                                                                     |
| EPI_ISL_519427                                                                                                                                                                                                                                                                                                                                                                                                                                                                                                                                                                                                                                                                                                                                                                                                                            | Microbiological Diagnostic Unit - Public Health Laboratory (MDU-PHL)                                                                           | MDU-PHL                                                                                                                                                                                                                                                                                                                                                                                                                                                                                                                           | Sait, M.; Schultz M.; Seemann T.; Sherry, N.                                                                                                                                                                                                                                                                                                                                                                                                                                                                                                             |
| EPI_ISL_427149, EPI_ISL_430668                                                                                                                                                                                                                                                                                                                                                                                                                                                                                                                                                                                                                                                                                                                                                                                                            | Microbiological Diagnostic Unit Public Health Laboratory                                                                                       | Microbiological Diagnostic Unit Public Health Laboratory                                                                                                                                                                                                                                                                                                                                                                                                                                                                          | Sait, M.; Schultz M.; Seemann T.; Sherry, N.                                                                                                                                                                                                                                                                                                                                                                                                                                                                                                             |
| EPI_ISL_513925                                                                                                                                                                                                                                                                                                                                                                                                                                                                                                                                                                                                                                                                                                                                                                                                                            | Microbiology & Bioinformatics and Biostatistics, Kohat University of Science and Technology (Pakistan) & Shanghai Jiao Tong University (China) | Microbiology & Bioinformatics and Biostatistics, Kohat University of Science and Technology (Pakistan) & Shanghai Jiao Tong University (China)                                                                                                                                                                                                                                                                                                                                                                                    | A.S.; Ali, S.; D.Q.; Khan; M.T.; Muhammad; N. and Wei; T.A.                                                                                                                                                                                                                                                                                                                                                                                                                                                                                              |
| EPI_ISL_2136858                                                                                                                                                                                                                                                                                                                                                                                                                                                                                                                                                                                                                                                                                                                                                                                                                           | Microbiology Department, Laboratori Clinic Metropolitan Nord. Hospital Universitari Germans Trias i Pujol                                      | Can Ruti SARS-CoV-2 Sequencing Hub (HUGTIPI/IRSI/CAIXA/IGTP)                                                                                                                                                                                                                                                                                                                                                                                                                                                                      | Alba Sánchez; Anna Not; Antoni E Bordoy; Bonaventura Clotet; Cristina Casañ; Cristina Esteban; Francesc Catala-Moll; Gemma Clara; Ignacio Blanco; Marc Noguera-Julian; Maria Casadellà; Mariona Parera; Mercedes Guerrero; Montserrat Giménez; Pere-Joan Cardona; Pilar Armengol; Roger Paredes; Verónica Saludes; and Elisa Martró on behalf of the Can Ruti SARS-CoV-2 Sequencing Hub.                                                                                                                                                                 |
| EPI_ISL_2931852                                                                                                                                                                                                                                                                                                                                                                                                                                                                                                                                                                                                                                                                                                                                                                                                                           | Microbiology Department. Complejo Hospitalario Universitario de Vigo                                                                           | Microbiology Department. Complejo Hospitalario Universitario de Vigo                                                                                                                                                                                                                                                                                                                                                                                                                                                              | Alfaya N; Alonso I; Alvarez M; Cabrera JJ; Carballo R; Cores O; Cortizo S; Davina C; Martinez L; Mediero G; Perez S; Potel C; Regueiro B; Rey S; Vassallo FJ; del-Campo V                                                                                                                                                                                                                                                                                                                                                                                |
| EPI_ISL_1303252                                                                                                                                                                                                                                                                                                                                                                                                                                                                                                                                                                                                                                                                                                                                                                                                                           | Microbiology Division, South Carolina Department of Health and Environmental Control                                                           | Microbiology Division, South Carolina Department of Health and Environmental Control                                                                                                                                                                                                                                                                                                                                                                                                                                              | Flores, H.; Freeman, J.                                                                                                                                                                                                                                                                                                                                                                                                                                                                                                                                  |
| EPI_ISL_2688489                                                                                                                                                                                                                                                                                                                                                                                                                                                                                                                                                                                                                                                                                                                                                                                                                           | Microbiology Laboratory, Attikon University Hospital, Athens                                                                                   | Central National Laboratory ,Public Health Organization                                                                                                                                                                                                                                                                                                                                                                                                                                                                           | N.Siafakas; S.Pournaras et al                                                                                                                                                                                                                                                                                                                                                                                                                                                                                                                            |
| EPI_ISL_1416330                                                                                                                                                                                                                                                                                                                                                                                                                                                                                                                                                                                                                                                                                                                                                                                                                           | Microbiology and Virology Laboratory, "Policlinico Riuniti, Azienda Ospedaliero Universitaria, Foggia"                                         | Microbiology and Virology Laboratory, "Policlinico Riuniti, Azienda Ospedaliero Universitaria, Foggia"                                                                                                                                                                                                                                                                                                                                                                                                                            | Annamaria D'Aprile; Daniela Pisanelli; Donatella Cedola; Fabio Arena; Loris Micelli; Maria Pia Patrizio; Maria Rosaria Lipsi; Maurizio Margaglione and Rosella De Nititis.; Settima Altamura; Tiziana Rollo; Valeria Delli Carri                                                                                                                                                                                                                                                                                                                         |
| EPI_ISL_1064063                                                                                                                                                                                                                                                                                                                                                                                                                                                                                                                                                                                                                                                                                                                                                                                                                           | Microbiology and Virology Unit, Azienda Ospedale Padova, Padova, Italy                                                                         | Department of Molecular Medicine, Computational Medicine Group, University of Padova, Padova, Italy                                                                                                                                                                                                                                                                                                                                                                                                                               | Andrea Crisanti; Andrea Spitaleri; Claudia Del Vecchio; Daniela Maria Cirillo; Dejan Lazarevic; Elisa Franchin; Enrico Lavezzo; Fabio Simeoni; Federico Bianca; Francesca Saluzzo; Francesco Onelia; Giovanni Lorenzin; Giovanni Tonon; Laura Manuto; Marco Grazioli; Stefano Toppo                                                                                                                                                                                                                                                                      |
| EPI_ISL_3136161                                                                                                                                                                                                                                                                                                                                                                                                                                                                                                                                                                                                                                                                                                                                                                                                                           | Microbiology laboratory, National Center for Global Health and Medicine Hospital                                                               | Pathogen Genomics Center, National Institute of Infectious Diseases                                                                                                                                                                                                                                                                                                                                                                                                                                                               | Harutaka Katano; Kentaro Itokawa; Makoto Kuroda; Masanori Hashino; Norio Ohmagari; Rina Tanaka; Shinji Saito; Shun Iida; Tadaki Suzuki; Tsuyoshi Sekizuka; Yuichiro Hirata                                                                                                                                                                                                                                                                                                                                                                               |
| EPI_ISL_2348487                                                                                                                                                                                                                                                                                                                                                                                                                                                                                                                                                                                                                                                                                                                                                                                                                           | Middle East Institute of Health University Hospital                                                                                            | Microbial Pathogenomics Lab - LAU                                                                                                                                                                                                                                                                                                                                                                                                                                                                                                 | Edmond Abboud; Georgi Merhi; Jad Koweyes; Sima Tokajian                                                                                                                                                                                                                                                                                                                                                                                                                                                                                                  |
| see above                                                                                                                                                                                                                                                                                                                                                                                                                                                                                                                                                                                                                                                                                                                                                                                                                                 | Middlemore Hospital                                                                                                                            | Institute of Environmental Science and Research (ESR)                                                                                                                                                                                                                                                                                                                                                                                                                                                                             | Anja Werno; Antje van der Linden; Arlo Upton; Chris Mansell; David Hammer; Dragana Drinkovic; Erasmus Smit; Gary McAuliffe; Hana Sofia Andersson; Hermes Perez; James Usher; Jill Sherwood; Joep de Lig; Josh Freeman; Julia Howard; Juliet Elvy; Lauren Jelly; Mary DeAlmeida; Matt Blakiston; Matt Storey; Matthew Rogers; Max Bloomfield; Michael Addide; Michelle Balm; Sally Roberts; Sarah Jefferies; Sharmini Muttaiyah; Susan Lin; Susan Morpeth; Susan Taylor; Timothy Blackmore; Vani Sathyendran; Veronica Playle; Virginia Hope; Xiaoyun Ren |
| EPI_ISL_718146, EPI_ISL_2367475, EPI_ISL_2535605, EPI_ISL_2535657, EPI_ISL_2535659                                                                                                                                                                                                                                                                                                                                                                                                                                                                                                                                                                                                                                                                                                                                                        | Ministry of Health Hospitals                                                                                                                   | Institute of Health and Community Medicine                                                                                                                                                                                                                                                                                                                                                                                                                                                                                        | Chan Chia Jui; Chua Hok Hin; David Perera; Ooi Mong Hong; Tonnil Sia Loong Loong; Wong Jyn Shan; Wong Kling Aik                                                                                                                                                                                                                                                                                                                                                                                                                                          |
| EPI_ISL_428713, EPI_ISL_814079, EPI_ISL_1020467, EPI_ISL_1117613, EPI_ISL_2158034, EPI_ISL_2158057, EPI_ISL_2158066, EPI_ISL_2158074, EPI_ISL_2232628, EPI_ISL_2232646, EPI_ISL_2232672, EPI_ISL_2232673, EPI_ISL_2232674, EPI_ISL_2232675, EPI_ISL_2232676, EPI_ISL_2232695, EPI_ISL_22363590, EPI_ISL_22363596, EPI_ISL_2236362, EPI_ISL_22363736, EPI_ISL_2403280, EPI_ISL_2958500, EPI_ISL_2984650, EPI_ISL_2984684, EPI_ISL_2984763, EPI_ISL_2987762, EPI_ISL_2987829, EPI_ISL_2987841, EPI_ISL_2987930, EPI_ISL_2988072, EPI_ISL_3032772, EPI_ISL_3032778, EPI_ISL_3063381, EPI_ISL_3063382, EPI_ISL_3066742, EPI_ISL_3066746                                                                                                                                                                                                       |                                                                                                                                                | Ayşe Başak Altas; Fatma Bayraktar; Gulay Korukluoglu; Gülay Korukluoglu; Selçuk Kılıç; Süleyman Yalçın; Süleyman Yalçın; Yasemin Cosgun; Yasemin Cosgun                                                                                                                                                                                                                                                                                                                                                                           |                                                                                                                                                                                                                                                                                                                                                                                                                                                                                                                                                          |
| see above                                                                                                                                                                                                                                                                                                                                                                                                                                                                                                                                                                                                                                                                                                                                                                                                                                 | Ministry of Health Turkey                                                                                                                      | Ministry of Health Turkey                                                                                                                                                                                                                                                                                                                                                                                                                                                                                                         | Anfal Al-Awdani; Ebaa Al-Awadhi; Hussain Safar; Nada Madi                                                                                                                                                                                                                                                                                                                                                                                                                                                                                                |
| EPI_ISL_2846023                                                                                                                                                                                                                                                                                                                                                                                                                                                                                                                                                                                                                                                                                                                                                                                                                           | Ministry of Health, Jaber Al-Ahmad Hospital                                                                                                    | Virology Unit, Department of Microbiology, Faculty of Medicine, Kuwait University                                                                                                                                                                                                                                                                                                                                                                                                                                                 |                                                                                                                                                                                                                                                                                                                                                                                                                                                                                                                                                          |
| EPI_ISL_1712690, EPI_ISL_1712705, EPI_ISL_1713194, EPI_ISL_1713231, EPI_ISL_1713276, EPI_ISL_1713546, EPI_ISL_1713637, EPI_ISL_2274279, EPI_ISL_2274319, EPI_ISL_2274351, EPI_ISL_2274354, EPI_ISL_2274358, EPI_ISL_2274390, EPI_ISL_2408295, EPI_ISL_2408310, EPI_ISL_2408353, EPI_ISL_2408365, EPI_ISL_2842881, EPI_ISL_2842914, EPI_ISL_2843042, EPI_ISL_2843050, EPI_ISL_2843081, EPI_ISL_2843089, EPI_ISL_2843116, EPI_ISL_2843135, EPI_ISL_2843139, EPI_ISL_2843146, EPI_ISL_2843237, EPI_ISL_2843241, EPI_ISL_2843246, EPI_ISL_2843259, EPI_ISL_2843273, EPI_ISL_2843280, EPI_ISL_2843284, EPI_ISL_2843285                                                                                                                                                                                                                         |                                                                                                                                                | Asmaa A. Al-Thani. MOPH and HMC: Abdullatif Al-Khal; Asmaa A. Al-Thani. MOPH and HMC: Abdullatif Al-Khal; BRC: Fatima H. Benslimane; Chadi Saad; Dana Al-Batesh; Dina Elgakhlab OGP: Fatima H. Al-Kuwari; Dina Elgakhlab OGP: Fatima H. Al-Kuwari; Einas A. E. Al-Kuwari; Hadi M. Yassine; Hamad E. Al-Romaihi; Hamda Alromaihi; Heba A. Al-Khatib; Masha'el A. Al-Bader; Mohammed Al-Thani; Muna A. S. Al-Maslamani; Oal Al-Jamal; Peter V. Coyle; Reham A. El-Kahlout. QBB: Tasneem Al-Hamad; Roberto Bertollini; Salih Al-Marr |                                                                                                                                                                                                                                                                                                                                                                                                                                                                                                                                                          |
| see above                                                                                                                                                                                                                                                                                                                                                                                                                                                                                                                                                                                                                                                                                                                                                                                                                                 | Ministry of Public Health / Hamad Medical Corporation                                                                                          | Biomedical Research Center (BRC), Qatar University / Qatar Genome Project (QGP)                                                                                                                                                                                                                                                                                                                                                                                                                                                   | Asmaa A. Al-Thani. MOPH and HMC: Abdullatif Al-Khal; Asmaa A. Al-Thani. MOPH and HMC: Abdullatif Al-Khal; BRC: Fatima H. Benslimane; Chadi Saad; Dana Al-Batesh; Dina Elgakhlab OGP: Fatima H. Al-Kuwari; Dina Elgakhlab OGP: Fatima H. Al-Kuwari; Einas A. E. Al-Kuwari; Hadi M. Yassine; Hamad E. Al-Romaihi; Hamda Alromaihi; Heba A. Al-Khatib; Masha'el A. Al-Bader; Mohammed Al-Thani; Muna A. S. Al-Maslamani; Oal Al-Jamal; Peter V. Coyle; Reham A. El-Kahlout. QBB: Tasneem Al-Hamad; Roberto Bertollini; Salih Al-Marr                        |
| EPI_ISL_1714165, EPI_ISL_1714185, EPI_ISL_1714328, EPI_ISL_1714331, EPI_ISL_1714468, EPI_ISL_1714531, EPI_ISL_1714557                                                                                                                                                                                                                                                                                                                                                                                                                                                                                                                                                                                                                                                                                                                     |                                                                                                                                                |                                                                                                                                                                                                                                                                                                                                                                                                                                                                                                                                   |                                                                                                                                                                                                                                                                                                                                                                                                                                                                                                                                                          |
| see above                                                                                                                                                                                                                                                                                                                                                                                                                                                                                                                                                                                                                                                                                                                                                                                                                                 | Ministry of Public Health / Hamad Medical Corporation                                                                                          | Weill Cornell Medical College - Qatar (WCM-Q), Genomics Core Laboratory / Qatar Genome Project (QGP)                                                                                                                                                                                                                                                                                                                                                                                                                              | Chadi Saad MOPH and HMC: Abdullatif Al-Khal; Dina Elgakhlab; Einas A. E. Al-Kuwari; Hamad E. Al-Romaihi; Hamda Alromaihi; Joel A Malek. QGP: Fatima H. Al-Kuwari; Laith Abu-Raddad; Masha'el A. Al-Bader; Meryem Bensaad; Mohammed Al-Thani; Muna A. S. Al-Maslamani; Peter V. Coyle; Reham A. El-Kahlout. QBB: Tasneem Al-Hamad; Roberto Bertollini; Salih Al-Marr; Shamiem Younuskurji; WCMQ: Ayeda A. Ahmed; Yasmin Mohamoud                                                                                                                          |
| EPI_ISL_708485, EPI_ISL_1760680, EPI_ISL_2015217, EPI_ISL_2443802, EPI_ISL_2536893                                                                                                                                                                                                                                                                                                                                                                                                                                                                                                                                                                                                                                                                                                                                                        | Minnesota Department of Health, Public Health Laboratory                                                                                       | Minnesota Department of Health, Public Health Laboratory                                                                                                                                                                                                                                                                                                                                                                                                                                                                          | Alexandra Lorentz; Jacob Garfin; Matt Plumb; and Xiong Wang                                                                                                                                                                                                                                                                                                                                                                                                                                                                                              |
| EPI_ISL_1362768, EPI_ISL_1392816, EPI_ISL_2035597                                                                                                                                                                                                                                                                                                                                                                                                                                                                                                                                                                                                                                                                                                                                                                                         | Missouri State Public Health Laboratory                                                                                                        | Missouri State Public Health Laboratory                                                                                                                                                                                                                                                                                                                                                                                                                                                                                           | Ashley New; Joshua Barry; Matthew Sinn                                                                                                                                                                                                                                                                                                                                                                                                                                                                                                                   |
| EPI_ISL_2140698                                                                                                                                                                                                                                                                                                                                                                                                                                                                                                                                                                                                                                                                                                                                                                                                                           | Mitchells Plain Hospital wc MPH                                                                                                                | NHLS/UUCT                                                                                                                                                                                                                                                                                                                                                                                                                                                                                                                         | Arash Iranzadeh; Bruna Galvao; Carolyn Williamson; Deelan Doolabh; Diana Hardie; Innocent Mudau; Kruger Marais; Lynn Tyers; Marvin Hsiao; Stephen Korsman                                                                                                                                                                                                                                                                                                                                                                                                |
| EPI_ISL_2861095, EPI_ISL_2928345                                                                                                                                                                                                                                                                                                                                                                                                                                                                                                                                                                                                                                                                                                                                                                                                          | Mobile County Health Department                                                                                                                | Synergy Laboratories                                                                                                                                                                                                                                                                                                                                                                                                                                                                                                              | Megan Cornwell                                                                                                                                                                                                                                                                                                                                                                                                                                                                                                                                           |
| EPI_ISL_435127, EPI_ISL_463740, EPI_ISL_520723                                                                                                                                                                                                                                                                                                                                                                                                                                                                                                                                                                                                                                                                                                                                                                                            | Mohammed Bin Rashid University of Medicine and Health Sciences                                                                                 | Al Jalila Genomics Center                                                                                                                                                                                                                                                                                                                                                                                                                                                                                                         | Abdulmajeed Alkhaja; Abiola Catherine Senok; Ahmad Abou Tayoun; Alawi Alsheikh-Ali; Divinlal Harilal; Hamda Khansheh; Hanan Al Suwaidi; Mohammed Uddin; Norbert Nowotny; Qutayba Hamid; Rabih Halwani; Rifat Hamoudi; Rupa Murthy Varghese; Sathishkumar Ramaswamy; Tom Loney; Zulfa Omar Deesi                                                                                                                                                                                                                                                          |
| EPI_ISL_2101058, EPI_ISL_2101204                                                                                                                                                                                                                                                                                                                                                                                                                                                                                                                                                                                                                                                                                                                                                                                                          | Molecular Biology Laboratory, Faculty Medicine and Health Sciences, Warmadewa University                                                       | Eijkman Institute for Molecular Biology, National Agency for Research and Innovation; Molecular Biology Laboratory, Faculty Medicine and Health Sciences, Warmadewa University                                                                                                                                                                                                                                                                                                                                                    | Amin Soebandrio; Edison Johar; Eryl Sintya; Frilisita A Yudhaputri; Hidayat Trimarsanto; Iskandar Adnan; Khin Saw Myint; Lidwina Priliani; Lydia V. Panggalo; Muhammad Rezki Rasyak; Safarina G Malik; Sri Masyeni; Sukma Oktavianthi; Willy Agustine                                                                                                                                                                                                                                                                                                    |
| EPI_ISL_2095819                                                                                                                                                                                                                                                                                                                                                                                                                                                                                                                                                                                                                                                                                                                                                                                                                           | Molecular Diagnostics Mater Dei Hospital Pathology Department Malta                                                                            | Molecular Diagnostics Mater Dei Hospital Pathology Department Malta                                                                                                                                                                                                                                                                                                                                                                                                                                                               | C Cilia; G Zahra; L Grech; R Borg                                                                                                                                                                                                                                                                                                                                                                                                                                                                                                                        |

|                                                                                                                                                                                                                                                                                                                                                                                                                                                                           |           |                                                                                                                                                                                                                |                                                                                                                                                                                  |                                                                                                                                                                                                                                                                                                                                                                                                                                                                                                                                                                                                                                                                                                                                                                                                                                  |
|---------------------------------------------------------------------------------------------------------------------------------------------------------------------------------------------------------------------------------------------------------------------------------------------------------------------------------------------------------------------------------------------------------------------------------------------------------------------------|-----------|----------------------------------------------------------------------------------------------------------------------------------------------------------------------------------------------------------------|----------------------------------------------------------------------------------------------------------------------------------------------------------------------------------|----------------------------------------------------------------------------------------------------------------------------------------------------------------------------------------------------------------------------------------------------------------------------------------------------------------------------------------------------------------------------------------------------------------------------------------------------------------------------------------------------------------------------------------------------------------------------------------------------------------------------------------------------------------------------------------------------------------------------------------------------------------------------------------------------------------------------------|
| EPI_ISL_2006673, EPI_ISL_2101345, EPI_ISL_2101350, EPI_ISL_2101358, EPI_ISL_2102068, EPI_ISL_2102070, EPI_ISL_2105875, EPI_ISL_2105881, EPI_ISL_2105939, EPI_ISL_2113984, EPI_ISL_2114905, EPI_ISL_21399438, EPI_ISL_2399457, EPI_ISL_2399611, EPI_ISL_2716425, EPI_ISL_2716474, EPI_ISL_2718538, EPI_ISL_2854661, EPI_ISL_2970370, EPI_ISL_2970563, EPI_ISL_2970965, EPI_ISL_2973300, EPI_ISL_2988654, EPI_ISL_2988658                                                   | see above | Molecular Diagnostics Pathology Department Mater Dei Hospital Malta                                                                                                                                            | Molecular Diagnostics Pathology Department Mater Dei Hospital Malta                                                                                                              | C Cilia; G Zahra; L Grech; M Briffa; R Borg                                                                                                                                                                                                                                                                                                                                                                                                                                                                                                                                                                                                                                                                                                                                                                                      |
| EPI_ISL_681690, EPI_ISL_681700                                                                                                                                                                                                                                                                                                                                                                                                                                            |           | Molecular Medicine Laboratory, University of Magallanes                                                                                                                                                        | Centro Asistencial Docente y de Investigacion, Universidad de Magallanes                                                                                                         | Diego Alvarez; Hermý Alvarez; Jacqueline Aldridge; Jorge González; Marcelo Navarrete; Marco Montes de Oca; Roberto Uribe-Paredes                                                                                                                                                                                                                                                                                                                                                                                                                                                                                                                                                                                                                                                                                                 |
| EPI_ISL_895793, EPI_ISL_895834                                                                                                                                                                                                                                                                                                                                                                                                                                            |           | Molecular biology division, Institute of Clinical Biochemistry and Diagnostics, Charles University, Faculty of Medicine in Hradec Králové and University Hospital Hradec Králové                               | Molecular biology division, Institute of Clinical Biochemistry and Diagnostics, Charles University, Faculty of Medicine in Hradec Králové and University Hospital Hradec Králové | Helena Kovaříková; Ivana Baranová; Jitka Novotná; Kateřina Hrochová; Kateřina Pehliková; Petr Brož; Tereza Batková; Vladimír Palička. Cooperation project with BioVendor-R&D and bioinformatics company BIOXSYS s.r.o.                                                                                                                                                                                                                                                                                                                                                                                                                                                                                                                                                                                                           |
| EPI_ISL_2031957                                                                                                                                                                                                                                                                                                                                                                                                                                                           |           | Molecular diagnostic laboratory of Federal Budget Institution of Science "Central Research Institute of Epidemiology" of The Federal Service on Customers' Rights Protection and Human Well-being Surveillance | Group of Genomics and Postgenomic Technologies of Central Research Institute of Epidemiology                                                                                     | Akimkin V.G.; Kaptelova V.V.; Kondrasheva L.Y.; Korneenko E.V.; Nadtoka M.I.; Saenko S.S.; Samojlov A.E.; Shipulina O.Y.; Sinicyn S.O.; Smirnova Y.S.; Speranskaya A.S.; Tivanova E.V.                                                                                                                                                                                                                                                                                                                                                                                                                                                                                                                                                                                                                                           |
| EPI_ISL_2626244                                                                                                                                                                                                                                                                                                                                                                                                                                                           |           | Molecular diagnostic laboratory of Federal Budget Institution of Science "Central Research Institute of Epidemiology" of The Federal Service on Customers' Rights Protection and Human Well-being Surveillance | Group of Genomics and Postgenomic Technologies of Central Research Institute of Epidemiology                                                                                     | Akimkin V.G.; Cherkashina A.S.; Kaptelova V.V.; Kondrasheva L.Y.; Korneenko E.V.; Nadtoka M.I.; Saenko S.S.; Samoilov A.E.; Sinitsyn S.O.; Smirnova Y.S.; Speranskaya A.S.; Tivanova E.V.                                                                                                                                                                                                                                                                                                                                                                                                                                                                                                                                                                                                                                        |
| EPI_ISL_1365029, EPI_ISL_1365031, EPI_ISL_1367691, EPI_ISL_1663669, EPI_ISL_1663671                                                                                                                                                                                                                                                                                                                                                                                       |           | Molecular diagnostic unit for viral haemorrhagic fevers and emerging viruses, Bouaké CHU Laboratory                                                                                                            | Molecular diagnostic unit for viral haemorrhagic fevers and emerging viruses, Bouaké CHU Laboratory                                                                              | Adjaratou Traoré; Bamba Fatoumata Touré; Chantal Akoua-Koffi; Coulibaly Mbegnan; Diané Bamourou; Essia Belarbi; Etié Anoh; Fabian Leendertz; Grit Schubert; Kra Ouffoué; Monemo Pacome; Oby Wayoro; Safiatou Karidioula; Soundélé Maïté                                                                                                                                                                                                                                                                                                                                                                                                                                                                                                                                                                                          |
| EPI_ISL_614348, EPI_ISL_614364, EPI_ISL_614382, EPI_ISL_614391, EPI_ISL_681834, EPI_ISL_682058, EPI_ISL_1662579, EPI_ISL_1662582, EPI_ISL_1662584                                                                                                                                                                                                                                                                                                                         | see above | Molecular diagnostic unit for viral haemorrhagic fevers and emerging viruses, Bouaké CHU Laboratory                                                                                                            | Project group Epidemiology of Highly Pathogenic Microorganisms, Robert Koch-Institute                                                                                            | Adjaratou Traoré; Bamba Fatoumata Touré; Chantal Akoua-Koffi; Coulibaly Mbegnan; Diané Bamourou; Essia Belarbi; Etié Anoh; Fabian Leendertz; Grit Schubert; Kra Ouffoué; Monemo Pacome; Safiatou Karidioula; Soundélé Maïté                                                                                                                                                                                                                                                                                                                                                                                                                                                                                                                                                                                                      |
| EPI_ISL_1881945                                                                                                                                                                                                                                                                                                                                                                                                                                                           |           | Molekylær Medicinsk Afdeling, Aarhus University Hospital, Aarhus, Denmark                                                                                                                                      | Aalborg University                                                                                                                                                               | Danish Covid-19 Genome Consortium                                                                                                                                                                                                                                                                                                                                                                                                                                                                                                                                                                                                                                                                                                                                                                                                |
| EPI_ISL_2350967, EPI_ISL_2351003                                                                                                                                                                                                                                                                                                                                                                                                                                          |           | Mongkutwattana General Hospital                                                                                                                                                                                | Division of Genomic Medicine and Innovation support, Department of Medical Sciences, Ministry of Public Health, Thailand                                                         | Archawin Rojanawit; Jirapha Pakdee; Natthakul Bunneang; Nuanjun Wichukchinda; Penpitcha Thawong; Pilailuk Akkapaiboon Okada; Pundharika Pibonsiri; Surakameth Mahasirimongkol; Waritta Sawaengdee                                                                                                                                                                                                                                                                                                                                                                                                                                                                                                                                                                                                                                |
| EPI_ISL_889366, EPI_ISL_3031397, EPI_ISL_1534267, EPI_ISL_2429125, EPI_ISL_2429128, EPI_ISL_2899875, EPI_ISL_2964432, EPI_ISL_2964451, EPI_ISL_2382733                                                                                                                                                                                                                                                                                                                    |           | Motol University Hospital<br>Mount Kenya Hospital<br>Mowbray Maternity Hospital wc MMH<br>Mubarak Al-Kabeer Hospital                                                                                           | Institute of Applied Biotechnologies a.s.<br>USAMRD-A, Basic Science Laboratory<br>NHL/UCT<br>Virology Unit, Department of Microbiology, Faculty of Medicine, Kuwait University  | Kateřina Kvapilová; Martin Kašný; Ondřej Brzoň; Pavel Dřevínek; Petr Klemp; Petr Kvapil<br>Alan Lemtudo; Beth Mutai; Brian Andika; Carol Kifude; Clement Masakwe; Eric Muthanje; Esther Omuseni; Faith Sigei; Gathii Kimita; George Awinda; John Waitumbi; Josphat Nyataya; Rachel Githii; Rehema Liyai; Stephen Ochola<br>Arash Iranzadeh; Bruna Galva; Carolyn Williamson; Deelan Doolabh; Diana Hardie; Innocent Mudau; Richard Garceau; Kruger Marais; Lynn Tyers; Marvin Hsiao; Stephen Korsman<br>Anfal Al-Adwani; Hussain Safar; Nada Madi                                                                                                                                                                                                                                                                                |
| EPI_ISL_912481, EPI_ISL_1818956, EPI_ISL_1818891, EPI_ISL_2162307, EPI_ISL_2162308, EPI_ISL_2162309, EPI_ISL_2162311, EPI_ISL_2162320, EPI_ISL_2162335, EPI_ISL_2162339, EPI_ISL_2162340, EPI_ISL_2162341, EPI_ISL_2162346, EPI_ISL_2162347, EPI_ISL_2162351, EPI_ISL_2162354, EPI_ISL_2162357, EPI_ISL_2162358, EPI_ISL_2162359, EPI_ISL_2162360, EPI_ISL_2162361, EPI_ISL_2162362, EPI_ISL_2162365, EPI_ISL_2162366, EPI_ISL_2162371, EPI_ISL_2162378                   | see above | N.F. Gamaleya Research Center for Epidemiology and Microbiology                                                                                                                                                | WHO National Influenza Centre Russian Federation                                                                                                                                 | Alexander Gintsburg; Alexey Shchetinin; Alina Odintsova; Andrei Botikov; Andrei Pochtovyi; Andrei Siniavin; Andrey Komissarov; Anna Kovyrshina; Artem Fadeev; Artem Tkachuk; Daria Danilenko; Denis Kleymenov; Denis Logunov; Dmitry Lioznov; Dmitry Shcheblyakov; Elena Mazunina; Elena Nabieva; Elena Shidlovskaya; Elizaveta Divisenko; Evgeniia Bykonia; Georgii Bazynkin; Inna Dolzhikova; Kirill Varchenko; Ksenia Safina; Kseniya Komissarova; Liubov Popova; Ludmila Vasilchenko; Maria Nikiforova; Maria Pisareva; Mikhail Bakaev; Nadezhda Kuznetsova; Nikita Yolshin; Oula Mansour; Tamila Musaeva; Veronika Eder; Vladimir Gushchin                                                                                                                                                                                  |
| EPI_ISL_2382733                                                                                                                                                                                                                                                                                                                                                                                                                                                           |           | NAMRU-6                                                                                                                                                                                                        | Genomics and Discovery, Respiratory Viruses Branch, Division of Viral Diseases, Centers for Disease Control and Prevention                                                       | Adam Retchless; Anna Kelleher; Anna Uehara; Brian Lynch; Clinton R. Paden; Dhwaní Batra; Haibin Wang; Han Jia Justin Ng; Jasmine Padilla; Jing Zhang; Justin Lee; Krista Queen; Mark Burroughs; Mili Sheth; Morgan Davis; Peter Cook; Rachel Marine; Sarah Nobles; Suxiang Tong; Tara Coalter; Yan Li; Ying Tao                                                                                                                                                                                                                                                                                                                                                                                                                                                                                                                  |
| EPI_ISL_2550520                                                                                                                                                                                                                                                                                                                                                                                                                                                           |           | NB-Hôpital Georges L. Dumont                                                                                                                                                                                   | National Microbiology Laboratory (NML)                                                                                                                                           | Anna Majer; Anneliese Landgraff; CanCOGeN's metadata curation team; Darian Hole; Elsie Grudeski; Gary Van Domselaar; Grace Seo; Guillaume Desnoyers; Jennifer Tanner; Kirsten Biggar; Madison Chapel; Morag Graham; Natalie Knox; Nathalie Bastien; Philip Mabon; Public Health Agency of Canada CanCOGeN team; Rhiannon Huzarewich; Richard Garceau; Russell Mandes; Shari Tyson; Timothy Booth; Yan Li                                                                                                                                                                                                                                                                                                                                                                                                                         |
| EPI_ISL_2710271, EPI_ISL_2726856                                                                                                                                                                                                                                                                                                                                                                                                                                          |           | NHLS Charlotte Maxeke Johannesburg Academic Hospital and the University of the Witwatersrand                                                                                                                   | KRISP, KZN Research Innovation and Sequencing Platform                                                                                                                           | Bulelani Manene; Florette Treurnicht; Giandhari Jennifer; Kathleen Subramoney; Naidoo Yeshnee; Pillay Sureshnee; San James; Tegally Houriiyah; Tshabulla Derek; Wilkinson Eduan; Yajna Ramphal; de Oliveira Tulio                                                                                                                                                                                                                                                                                                                                                                                                                                                                                                                                                                                                                |
| EPI_ISL_912481, EPI_ISL_1818956, EPI_ISL_1818891, EPI_ISL_2162307, EPI_ISL_2162308, EPI_ISL_2162309, EPI_ISL_2162311, EPI_ISL_2162320, EPI_ISL_2162335, EPI_ISL_2162339, EPI_ISL_2162340, EPI_ISL_2162341, EPI_ISL_2162346, EPI_ISL_2162347, EPI_ISL_2162351, EPI_ISL_2162354, EPI_ISL_2162357, EPI_ISL_2162358, EPI_ISL_2162359, EPI_ISL_2162360, EPI_ISL_2162361, EPI_ISL_2162362, EPI_ISL_2162365, EPI_ISL_2162366, EPI_ISL_2162371, EPI_ISL_2162378                   | see above | NHLS Universitas Academic                                                                                                                                                                                      | UFS Virology                                                                                                                                                                     | D Goedhals; Emmanuel Ogunbayo; MM Nyaga; MT Mogotsi; P Nthiga; PA Bester; T de Oliveira                                                                                                                                                                                                                                                                                                                                                                                                                                                                                                                                                                                                                                                                                                                                          |
| EPI_ISL_467513, EPI_ISL_518043, EPI_ISL_529765, EPI_ISL_560605, EPI_ISL_660660, EPI_ISL_736971, EPI_ISL_860607, EPI_ISL_2693039, EPI_ISL_2693050, EPI_ISL_2693075, EPI_ISL_2693084, EPI_ISL_2693093                                                                                                                                                                                                                                                                       |           | NHLS-IALCH<br>NHLS_VIRO                                                                                                                                                                                        | KRISP, KZN Research Innovation and Sequencing Platform<br>KRISP, KZN Research Innovation and Sequencing Platform                                                                 | Chimukangara B; ChimukangaraB; Giandhari J; Khan S; Lessells R; Mdlalose K; Pillay S; Tegally H; Wilkinson E; York D; de Oliveira T                                                                                                                                                                                                                                                                                                                                                                                                                                                                                                                                                                                                                                                                                              |
| EPI_ISL_2494387, EPI_ISL_2494397, EPI_ISL_2494427, EPI_ISL_2494465, EPI_ISL_2494505, EPI_ISL_2494506, EPI_ISL_2494511, EPI_ISL_2494541, EPI_ISL_2494569, EPI_ISL_2494618, EPI_ISL_2494619, EPI_ISL_2494625, EPI_ISL_2727380, EPI_ISL_2727391, EPI_ISL_2727393, EPI_ISL_2727394                                                                                                                                                                                            | see above | NHLS_VIRO                                                                                                                                                                                                      | KRISP, KZN Research Innovation and Sequencing Platform                                                                                                                           | Giandhari J; Khan S; Lessells R; Mdlalose K; Pillay S; Tegally H; Wilkinson E; York D; de Oliveira T                                                                                                                                                                                                                                                                                                                                                                                                                                                                                                                                                                                                                                                                                                                             |
| EPI_ISL_2693824, EPI_ISL_2693825, EPI_ISL_2693828, EPI_ISL_2693832, EPI_ISL_2693835, EPI_ISL_2693860, EPI_ISL_2693863, EPI_ISL_2693864, EPI_ISL_2693865, EPI_ISL_2693899, EPI_ISL_2893253, EPI_ISL_2893257, EPI_ISL_2893260, EPI_ISL_2893268, EPI_ISL_2893284, EPI_ISL_2893296                                                                                                                                                                                            | see above | NHLS_VIRO Eastern Cape                                                                                                                                                                                         | KRISP, KZN Research Innovation and Sequencing Platform                                                                                                                           | Emmanuel S; Giandhari J; Giandhari Jennifer; Khan S; Laguda-Akingba O; Lessells R; Mdlalose K; Naidoo Yeshnee; Pillay S; Pillay Sureshnee; San James; Tegally H; Tegally Houriiyah; Tshabulla Derek; Wilkinson E; Wilkinson Eduan; Yajna Ramphal; York D; de Oliveira T; de Oliveira Tulio                                                                                                                                                                                                                                                                                                                                                                                                                                                                                                                                       |
| EPI_ISL_2727175, EPI_ISL_2727179, EPI_ISL_2727180, EPI_ISL_2727185, EPI_ISL_2727186, EPI_ISL_2727189, EPI_ISL_2727193, EPI_ISL_2727194, EPI_ISL_2727195, EPI_ISL_2727196, EPI_ISL_2727197, EPI_ISL_2727198, EPI_ISL_2727216, EPI_ISL_2727217, EPI_ISL_2955454, EPI_ISL_2955464, EPI_ISL_2955466, EPI_ISL_2955472, EPI_ISL_2955474, EPI_ISL_2955475, EPI_ISL_2955479, EPI_ISL_2955484, EPI_ISL_2955487, EPI_ISL_2955488, EPI_ISL_2955490, EPI_ISL_2955497, EPI_ISL_2955499 | see above | NHLS_VIRO Eastern Cape                                                                                                                                                                                         | KRISP, KZN Research Innovation and Sequencing Platform                                                                                                                           | Emmanuel S; Giandhari J; Khan S; Laguda-Akingba O; Lessells R; Mdlalose K; Pillay S; Tegally H; Wilkinson E; York D; de Oliveira T                                                                                                                                                                                                                                                                                                                                                                                                                                                                                                                                                                                                                                                                                               |
| EPI_ISL_766863, EPI_ISL_766864, EPI_ISL_766865, EPI_ISL_766869, EPI_ISL_766873, EPI_ISL_766874, EPI_ISL_766875                                                                                                                                                                                                                                                                                                                                                            | see above | NIC Viral Respiratory Unit - Institut Pasteur of Algeria                                                                                                                                                       | National Reference Center for Viruses of Respiratory Infections, Institut Pasteur, Paris                                                                                         | Angela Brisebarre; Etienne Simon-Lorière; Fawzi Derrar; Flora Donati; Marion Barbet; Maud Vanpeene; Mélanie Albert; Méline Bizard; Sylvie Behillil; Sylvie van der Werf; Vincent Enouf                                                                                                                                                                                                                                                                                                                                                                                                                                                                                                                                                                                                                                           |
| EPI_ISL_577717, EPI_ISL_2161796, EPI_ISL_2484617, EPI_ISL_960304, EPI_ISL_1579896, EPI_ISL_1628463, EPI_ISL_1654970, EPI_ISL_1016162, EPI_ISL_416742                                                                                                                                                                                                                                                                                                                      |           | NIV Influenza<br>NL-Dr. Leonard A. Miller Centre for Health Services<br>NLZOH, Laboratory for Virology<br>NMVRVI                                                                                               | NIV Influenza<br>National Microbiology Laboratory (NML)<br>NLZOH, Laboratory for Virology<br>National Public Health Surveillance Laboratory                                      | NIV; Potdar; Pune; Varsha on behalf of National Influenza Centre<br>Adel Malek; Anna Majer; Anneliese Landgraff; CanCOGeN's metadata curation team; Darian Hole; Elsie Grudeski; Gary Van Domselaar; George Zahariadis; Grace Seo; Jennifer Tanner; Kerri Smith; Kirsten Biggar; Laura Gilbert; Madison Chapel; Morag Graham; Natalie Knox; Nathalie Bastien; Philip Mabon; Public Health Agency of Canada CanCOGeN team; Rhiannon Huzarewich; Robert Needle; Russell Mandes; Shari Tyson; Timothy Booth; Yan Li; Yang Yu<br>Cesare Camma (IZSAM); Erik Alm (ECDC); Katarina Prosenk (Laboratory for Virology)                                                                                                                                                                                                                   |
| EPI_ISL_1272388, EPI_ISL_1272389, EPI_ISL_1272390, EPI_ISL_1272391, EPI_ISL_2162047, EPI_ISL_2162051, EPI_ISL_3046227, EPI_ISL_903727                                                                                                                                                                                                                                                                                                                                     |           | NORTHWELL HEALTH LABORATORIES<br>NRL for Influenza, Centrum Epidemiology and Microbiology of National Institute of Public Health, Czech Republic<br>NS-QEII Health Sciences Centre                             | Wadsworth Center, New York State Department of Health<br>Charite Universitaetsmedizin Berlin, Institute of Virology<br>National Microbiology Laboratory (NML)                    | Alexis Russel; Daryl M. Lamson; Erasmus Schneider; Erica Lasek-Nesselck; John Kelly; Jonathan Pitnick; Kirsten St. George; Matthew Shudt; Melissa A Leisner; Navjot Singh<br>Akexander Nagy; Barbara Muehleemann; Christian Drosten; Dusan Trnka; Helena Jirincova; Jaromira Vecerova; Jörn Beheim-Schwarzbach; Julia Schneider; Ludmila Novakova; Talitha Veith; Terry Jones; Victor M Corman<br>Anna Majer; Anneliese Landgraff; CanCOGeN's metadata curation team; Dan Gaston; Darian Hole; Elsie Grudeski; Gary Van Domselaar; Grace Seo; Janice Pettipas; Jason LeBlanc; Jennifer Tanner; Kirsten Biggar; Madison Chapel; Morag Graham; Natalie Knox; Nathalie Bastien; Philip Mabon; Public Health Agency of Canada CanCOGeN team; Rhiannon Huzarewich; Russell Mandes; Shari Tyson; Timothy Booth; Todd Hatchette; Yan Li |
| EPI_ISL_3046227                                                                                                                                                                                                                                                                                                                                                                                                                                                           |           | NUPIT/UFPE                                                                                                                                                                                                     | WallauLab on behalf of Fiocruz COVID-19 Genomic Surveillance Network                                                                                                             | Alexandre Freitas da Silva; Cassia Docena; Constância Flávia Junqueira Ayres; Filipe Zimmer Dezordi; Gabriel Luz Wallau; Gustavo Barbosa de Lima; Lais Ceschini Machado; Lilian Caroliny Amorim Silva; Maira Galdino da Rocha Pitta; Marcelo Henrique dos Santos Paiva; Matheus Filgueira Bezerra; Michelly Cristiny Pereira; Rômulo Pessoa e Silva; Sinalvi Pinto Brandão Filho                                                                                                                                                                                                                                                                                                                                                                                                                                                 |
| EPI_ISL_903727                                                                                                                                                                                                                                                                                                                                                                                                                                                            |           | NV State Public Health Laboratory                                                                                                                                                                              | Genomics and Discovery, Respiratory Viruses Branch, Division of Viral Diseases, Centers for Disease Control and Prevention                                                       | Anna Montmayeur; Anna Uehara; Ben L. Rambo-Martin; Clinton R. Paden; Dhwaní Batra; Haibin Wang; Jasmine Padilla; Jing Zhang; Justin Lee; Krista Queen; Lori Rose; Mark Burroughs; Mili Sheth; Peter W. Cook; Rachel Marine; Sarah Nobles; Suxiang Tong; Yan Li; Ying Tao                                                                                                                                                                                                                                                                                                                                                                                                                                                                                                                                                         |

|                                                                                                                                                                                                                                                                                                                                                                                      |                                                                                                                                                          |                                                                                                                                                                                                                                          |                                                                                                                                                                                                                                                                                                                                                                                                                                                                                                                                                                                                  |
|--------------------------------------------------------------------------------------------------------------------------------------------------------------------------------------------------------------------------------------------------------------------------------------------------------------------------------------------------------------------------------------|----------------------------------------------------------------------------------------------------------------------------------------------------------|------------------------------------------------------------------------------------------------------------------------------------------------------------------------------------------------------------------------------------------|--------------------------------------------------------------------------------------------------------------------------------------------------------------------------------------------------------------------------------------------------------------------------------------------------------------------------------------------------------------------------------------------------------------------------------------------------------------------------------------------------------------------------------------------------------------------------------------------------|
| EPI_ISL_1226660, EPI_ISL_1226661, EPI_ISL_1922797                                                                                                                                                                                                                                                                                                                                    | NYC Pandemic Response Lab<br>NYU Langone Health                                                                                                          | Wadsworth Center, New York State Department of Health<br>Departments of Pathology and Medicine, New York University School of Medicine                                                                                                   | Alexis Russel; Daryl M. Lamson; Erasmus Schneider; Erica Lasek-Nesselquist; John Kelly; Jonathan Pitnick; Kirsten St. George; Matthew Shudt; Melissa A Leisner; Navjot Singh<br>Adriana Heguy; Christian Marier; Dacia Dimartino; Emily Guzman; Gael Westby; Guiqing Wang; Paolo Cotzia; Paul Zappile; Peter Meyn; Sitharam Ramaswami; Yutong Zhang                                                                                                                                                                                                                                              |
| EPI_ISL_1960297, EPI_ISL_2694492, EPI_ISL_2798341, EPI_ISL_2800233, EPI_ISL_2800265, EPI_ISL_2800271                                                                                                                                                                                                                                                                                 | Nacionalinis maisto ir veterinarijos rizikos vertinimo institutas<br>Nacionālais medicīnas serviss - laboratorija, SIA                                   | National Public Health Surveillance Laboratory<br>Riga East University Hospital, National Microbiology Reference Laboratory; Eurofins Genomics Europe Sequencing GmbH                                                                    | Ana Steponkiene; Danas Baksa; Jelena Razmuk; Lukas Vasionis; Lukas Zemaitis; Migle Gabrielaite; Svajune Muralyte<br>Arzu Algueiva; Diāna Dušacka; Dārta Pūpola; Ilva Pole; Inita Balta; Jevgenijs Bodrenko; Jūlija Čevere; Nataja Mikena; Reinis Vangravs; Reinis Zeltmatis; Sergejs Nikšins; Girts Šķenders                                                                                                                                                                                                                                                                                     |
| EPI_ISL_523962, EPI_ISL_523966, EPI_ISL_2894992, EPI_ISL_2894993, EPI_ISL_2894994, EPI_ISL_2894995, EPI_ISL_2894996                                                                                                                                                                                                                                                                  | National Agency for Public Health, Republic of Moldova<br>National Agency for Public Health, Republic of Moldova                                         | Charite Universitätsmedizin Berlin, Institute of Virology<br>Charité Universitätsmedizin Berlin, Institut für Virologie                                                                                                                  | Ala Halacu; Barbara Mühlemann; Barbara Mühlemann; Christian Drosten; Elizabeta Jancheska; Golubinka Bosevska; Joern Beheim-Schwarzbach; Jörn Beheim-Schwarzbach; Julia Schneider; Maja Kuzmanovska; Mariana Apostol; Talitha Veith; Terry Jones; Victor M Corman<br>Ala Halacu; Barbara Mühlemann; Christian Drosten; Julia Schneider; Julia Tesch; Jörn Beheim-Schwarzbach; Mariana Apostol; Talitha Veith; Terry Jones; Tobias Bleicker; Victor M Corman                                                                                                                                       |
| EPI_ISL_1805651, EPI_ISL_1805740, EPI_ISL_1805741, EPI_ISL_1805697                                                                                                                                                                                                                                                                                                                   | National Center for Communicable Diseases (NCCD) National Influenza Center<br>National Center for Communicable Diseases (NCCD) National Influenza Center | National Center for Communicable Diseases (NCCD) National Influenza Center<br>National Centre for Disease Control (NCDC) National Influenza Center                                                                                       | Ankhhayar S; Battur L; Bayasgalan N; Darmaa B; Hideka M; Khishigmunkh Ch; Mina N; Naranzul Ts; Nymadawa P; Seiichiro F; Shinji W; Tsgozolmaa G<br>Ankhhayar S; Battur L; Bayasgalan N; Darmaa B; Hideka M; Khishigmunkh Ch; Mina N; Naranzul Ts; Nymadawa P; Seiichiro F; Shinji W; Tsgozolmaa G                                                                                                                                                                                                                                                                                                 |
| EPI_ISL_1233442, EPI_ISL_1718293, EPI_ISL_1718294                                                                                                                                                                                                                                                                                                                                    | National Center for Infectious and Parasitic Diseases (NCIPD)<br>National Center of Disease Control and Prevention of the Republic of Armenia            | National Center for Infectious and Parasitic Diseases (NCIPD)<br>Institute of Molecular Biology NAS RA, Republic of Armenia, Department of Bioengineering, Bioinformatics Institute and Molecular Biology IBMPH RAU, Republic of Armenia | Alexiev et al<br>Andranik Chavushyan; Arsen Arakelyan; Diana Avetyan; Gayane Melik-Pashayan; Gisane Khachatyan; Hovsep Ghazaryan; Maria Nikoghosyan; Nelli Muradyan; Roksana Zakharyan; Shushan Sargsyan; Siras Hakobyan; Tamara Sirunyan; Zaven Karalyan                                                                                                                                                                                                                                                                                                                                        |
| EPI_ISL_1854607, EPI_ISL_1854610, EPI_ISL_1854624, EPI_ISL_1854625, EPI_ISL_1854638, EPI_ISL_1854647                                                                                                                                                                                                                                                                                 | National Center of Disease Control and Prevention of the Republic of Armenia                                                                             | UW Virology Lab                                                                                                                                                                                                                          | Alexander Greninger; Anahit Hovhannisyany; Andranik Chavushyan; Anna Khazaryan; Arsen Arakelyan; Diana Avetyan; Gisane Khachatyan; Hong Xie; Hovsep Ghazaryan; Keith R. Jerome; Lasata Shrestha; Lyudmila Niazyan; Maria Nikoghosyan; Meei-Li Huang; Michelle Lin; Nelli Muradyan; Pavitra Roychoudhury; Roksana Zakharyan; Shah Mohamed Bakhsh; Siras Hakobyan; Tamara Sirunyan                                                                                                                                                                                                                 |
| EPI_ISL_454572, EPI_ISL_454571                                                                                                                                                                                                                                                                                                                                                       | National Center of Expertise<br>National Center of Expertise                                                                                             | National Center for Expertise, Kazakhstan National Center for Biotechnology, Kazakhstan<br>National Center for Expertise, National Center for Biotechnology, Kazakhstan                                                                  | ; Abdaliyev Askar; Akhmetollayev Ilyas; Amirgazin Asylulan; Aushakhmetova Zabira; Kalendar Ruslan; Lutsay Viktoriya; Rakhmetova Akbota; Ramankulov Yerlan; Shevtsov Alexandr<br>; Abdaliyev Askar; Akhmetollayev Ilyas; Amirgazin Asylulan; Aushakhmetova Zabira; Kalendar Ruslan; Lutsay Viktoriya; Rakhmetova Akbota; Ramankulov Yerlan; Shevtsov Alexandr                                                                                                                                                                                                                                     |
| EPI_ISL_1786307, EPI_ISL_2081876, EPI_ISL_2081915, EPI_ISL_2081935, EPI_ISL_2099343, EPI_ISL_2099441, EPI_ISL_2099454, EPI_ISL_2180209, EPI_ISL_2379203, EPI_ISL_2621269, EPI_ISL_2621400, EPI_ISL_2621428, EPI_ISL_2621449, EPI_ISL_2648098, EPI_ISL_2648102, EPI_ISL_2841870, EPI_ISL_2841883, EPI_ISL_2841901, EPI_ISL_2841982, EPI_ISL_2967059, EPI_ISL_2967087, EPI_ISL_2967113 | see above<br>National Center of Infectious and Parasitic Diseases<br>National Centre For Cell Science                                                    | National Center of Infectious and Parasitic Diseases<br>National Centre For Cell Science - INSACOG                                                                                                                                       | Alexiev; Alexiev et al; Dimitrova; Dobrinov; Donchev; Grigороva I.; Grigороva L.; Hristova; Ivanov; Kantardjiev; Korsun; Philipova; Stoitsova; Stoykov; Trifonova<br>Ajay Pillai; Dhiraj Paul; INSACOG Consortium team; Manoj Kumar Bhat; Mitali Inamdar; Mohak P Gujare; Shivang P. Bhanushali; Yogesh Shouche                                                                                                                                                                                                                                                                                  |
| EPI_ISL_2332763, EPI_ISL_2459215, EPI_ISL_2459216, EPI_ISL_2459690, EPI_ISL_2459936                                                                                                                                                                                                                                                                                                  | National Centre for Disease Control (NCDC) Biotechnology Division, Delhi                                                                                 | NCDC Delhi, Biotechnology Division INSACOG                                                                                                                                                                                               | Hema Gogia; Hemlata Lall; Kalaiarasan Ponnusamy; Mahesh S Dhar; Manoj K Singh; Meena Datta; Partha Rakshit; Preeti Madan; Priyanka Singh; Radhakrishnan N. V. S; Robin Marwal; Sandhya Kabra; Sujeet K Singh; Uma Sharma                                                                                                                                                                                                                                                                                                                                                                         |
| EPI_ISL_1661758, EPI_ISL_1909873                                                                                                                                                                                                                                                                                                                                                     | National Food and Veterinary Risk Assessment Institute<br>National Food and Veterinary Risk Assessment Institute (NMVRVI)                                | Vilnius University Hospital Santaros Klinikos, Center of Laboratory Medicine<br>National Public Health Surveillance Laboratory                                                                                                           | Daniel Naumovas; Dovile Ezerskyte; Gytis Dudas; Ingrida Olendraitė; Laimonas Griskevicius; Ligita Raugaite; Mindaugas Stoksus; Monika Katenaite; Rimvydas Norvilas<br>Ana Steponkiene; Danas Baksa; Jelena Razmuk; Lukas Vasionis; Lukas Zemaitis; Migle Gabrielaite; Svajune Muralyte                                                                                                                                                                                                                                                                                                           |
| EPI_ISL_528584, EPI_ISL_528585                                                                                                                                                                                                                                                                                                                                                       | National Genomics Core-Center for DNA Fingerprinting and Diagnostics                                                                                     | National Genomics Core- Center for DNA Fingerprinting and Diagnostics (NGC-CDFD)- DBT's PAN-INDIA-1000 Genome consortium                                                                                                                 | Abhijeeth Singh Thakur; Ashwin Dalal; Bala Pratyusha; Bathula Siddardha; Debashish Mitra; Divya Vashisht; G Shashikanth; Heena Shah; Lavanya Banda; Mohammad Mudassir; Murali Dharan Bashyam; Nalini Raghunathan; R Harinarayanan; Rajeshree Sanyal; Rashna Bhandari; Surya Chodisetty; Vinay Donipadi; Vineesha Oddi                                                                                                                                                                                                                                                                            |
| EPI_ISL_2492627, EPI_ISL_2492631, EPI_ISL_2492642, EPI_ISL_2492643, EPI_ISL_2492664, EPI_ISL_2492697, EPI_ISL_2492710, EPI_ISL_2493032, EPI_ISL_2493033, EPI_ISL_2493049, EPI_ISL_2493052, EPI_ISL_2493054, EPI_ISL_2493056, EPI_ISL_2493057, EPI_ISL_2686025                                                                                                                        | see above<br>National HIV Reference Laboratory, Ministry of Health, Public Health Institute of Malawi                                                    | CERI, Centre for Epidemic Response and Innovation, Stellenbosch University and KRISP, KZN Research Innovation and Sequencing Platform, UKZN.                                                                                             | Auld A; Chilima B; Chiwaula M; Emmanuel SJ; Giandhari J; Kaba M; Kampira E; Kasambara W; Kim L; Lessells R; Maida A; Mvula B; Mwagomba W; Naidoo Y; Panja L; Pillay S; Tegally H; Wadonda N; Wilkinson E; de Oliveira T                                                                                                                                                                                                                                                                                                                                                                          |
| EPI_ISL_1407121, EPI_ISL_1407184, EPI_ISL_1407198, EPI_ISL_2494782, EPI_ISL_2494844, EPI_ISL_2494924                                                                                                                                                                                                                                                                                 | National HIV Reference Laboratory, Ministry of Health, Public Health Institute of Malawi                                                                 | KRISP, KZN Research Innovation and Sequencing Platform                                                                                                                                                                                   | Auld A; Chilima B; Chiwaula M; Emmanuel SJ; Giandhari J; Kaba M; Kampira E; Kasambara W; Kim L; Lessells R; Maida A; Mvula B; Mwagomba W; Naidoo Y; Panja L; Pillay S; Tegally H; Wadonda N; Wilkinson E; de Oliveira T                                                                                                                                                                                                                                                                                                                                                                          |
| EPI_ISL_560387, EPI_ISL_560388, EPI_ISL_1677703, EPI_ISL_1677707, EPI_ISL_1677716                                                                                                                                                                                                                                                                                                    | National Health Laboratory                                                                                                                               | Botswana Institute for Technology Research and Innovation                                                                                                                                                                                | Dineo Emang Tshiamo. Gape Nyepetsi; Dineo Emang Tshiamo. Tefelo Thela; Gape Nyepetsi; Kefentse Arnold Tumedi; Madisa Mine; Maitshwarelo Ignatius Matsheka; Malebogo Keabonye; Thongbotho Mphoyakgosi                                                                                                                                                                                                                                                                                                                                                                                             |
| EPI_ISL_622942, EPI_ISL_622976, EPI_ISL_622980, EPI_ISL_622984, EPI_ISL_622989, EPI_ISL_622991                                                                                                                                                                                                                                                                                       | National Health Laboratory Service                                                                                                                       | National Institute for Communicable Diseases of the National Health Laboratory Service                                                                                                                                                   | Allam M; Bhiman JN; Ismail A; Khumalo Z; Kwenda S; Mnyameni F; Mohale T; Mtshali P; Subramoney K                                                                                                                                                                                                                                                                                                                                                                                                                                                                                                 |
| EPI_ISL_944143, EPI_ISL_944163, EPI_ISL_1250455, EPI_ISL_1817756, EPI_ISL_1817763, EPI_ISL_1817766, EPI_ISL_1817767, EPI_ISL_1817859, EPI_ISL_2086228, EPI_ISL_2086229, EPI_ISL_2086238, EPI_ISL_2086243, EPI_ISL_2494834, EPI_ISL_2494948                                                                                                                                           | see above<br>National Health Laboratory Service, South Africa                                                                                            | KRISP, KZN Research Innovation and Sequencing Platform                                                                                                                                                                                   | Emmanuel SJ; Giandhari J; Khan S; Laguda-Akingba O; Lessells R; Maslo C; Mlalose K; Naidoo Y; Pillay S; Ramphal U; Sitharam L; Tegally H; Wilkinson E; York D; de Oliveira T                                                                                                                                                                                                                                                                                                                                                                                                                     |
| EPI_ISL_2617196, EPI_ISL_2617201, EPI_ISL_2617210, EPI_ISL_2688538, EPI_ISL_2688543, EPI_ISL_2688549, EPI_ISL_2688550, EPI_ISL_2688553, EPI_ISL_2688563, EPI_ISL_2688564, EPI_ISL_2688573, EPI_ISL_2899689, EPI_ISL_2899695, EPI_ISL_2899725, EPI_ISL_2899740                                                                                                                        | see above<br>National Health Laboratory Service, South Africa                                                                                            | KRISP, KZN Research Innovation and Sequencing Platform                                                                                                                                                                                   | Giandhari Jennifer; Naidoo Yeshnee; Pillay Sureshnee; San James; Tegally Houriyah; Tshabuila Derek; Wilkinson Eduan; Yajna Ramphal; de Oliveira Tulio                                                                                                                                                                                                                                                                                                                                                                                                                                            |
| EPI_ISL_456597, EPI_ISL_456598, EPI_ISL_456601, EPI_ISL_456605, EPI_ISL_456610                                                                                                                                                                                                                                                                                                       | National Health Laboratory, Timor-Leste                                                                                                                  | Microbiological Diagnostic Unit Public Health Laboratory, The Peter Doherty Institute for Infection and Immunity                                                                                                                         | Antonia da Costa, E.; Baird, R.; Barreto, I.; Cally, L.; Canisla, D.; Dakh, F.; Dolores de Jesus da Costa, M.; Douglas, N.; Francis, J.; Freeman, K.; Jayanti Pereira Tilman, A.; Marr, I.; Sait, M.; Salles de Sousa, A.; Schultz, M.; Seemann, T.; Sherry, N.; Soares da Silva, E.; Wapling, J.; Ximenes, J.                                                                                                                                                                                                                                                                                   |
| EPI_ISL_2379748                                                                                                                                                                                                                                                                                                                                                                      | National Heart Institute                                                                                                                                 | Institute for Medical Research, Infectious Disease Research Centre, National Institutes of Health, Ministry of Health Malaysia                                                                                                           | Azizan MA; Kamel K; Mohd Zawawi Z; Ramiy N; Robert F; Suppiah J; Thayan R                                                                                                                                                                                                                                                                                                                                                                                                                                                                                                                        |
| EPI_ISL_2434158, EPI_ISL_2455479, EPI_ISL_2455488, EPI_ISL_2455494, EPI_ISL_2455495, EPI_ISL_2455496, EPI_ISL_2455497, EPI_ISL_2455498, EPI_ISL_2455500                                                                                                                                                                                                                              | National Hospital for Tropical Diseases                                                                                                                  | Oxford University Clinical Research Unit, Hanoi                                                                                                                                                                                          | H.Rogier van Doorn on behalf of the OUCRU COVID-19 research group; Le Van Duyet; Nguyen Thi Hong Thuong; Nguyen Thi Kim Chi; Nguyen Thi Tam; Nguyen Thu Trang; Pham Ngoc Thach; Phan Manh Cuong; Thomas Kesteman; Van Dinh Trang                                                                                                                                                                                                                                                                                                                                                                 |
| see above<br>EPI_ISL_511898, EPI_ISL_2695785                                                                                                                                                                                                                                                                                                                                         | National Hospital for Tropical Diseases<br>National Influenza Center (NIC). Virology department. Institut National d'Hygiène.                            | Oxford University Clinical Research Unit, Hanoi, Vietnam<br>Oxford University Clinical Research Unit, Hanoi, Vietnam<br>National Influenza Center (NIC). Virology department. Institut National d'Hygiène.                               | H.Rogier van Doorn on behalf of the OUCRU COVID-19 research group; Le Van Duyet; Nguyen Thi Hong Thuong; Nguyen Thi Kim Chi; Nguyen Thi Tam; Nguyen Thu Trang; Pham Ngoc Thach; Phan Manh Cuong; Thomas Kesteman; Van Dinh Trang<br>H. Rogier van Doorn; Le Nguyen Minh Hoa; Nguyen Thi Hong Thuong; Nguyen Thi Ngoc Diep; Nguyen Thi Tam; Nguyen Thu Trang; Pham Ngoc Thach; Van Dinh Trang; Vu Thi Ngoc Bich; on behalf of the OUCRU COVID-19 research group<br>Abderrahmane BIMOUHEN; Hassan IHAZMAD; Hicham OUMZIL; Samira BENKERROUM; Zakia REGRAGUI; fatima EL FALAKI and Mohamed RHAJAOUI |
| EPI_ISL_486889, EPI_ISL_862077, EPI_ISL_862078, EPI_ISL_1014676, EPI_ISL_1014681, EPI_ISL_1993547, EPI_ISL_1993552, EPI_ISL_1993554, EPI_ISL_1993557                                                                                                                                                                                                                                 | National Influenza Center, Bahrain<br>see above<br>National Influenza Center, Virology Department                                                        | National Influenza Center, Bahrain<br>National Influenza Center                                                                                                                                                                          | AlWasti, H.; Altaif, Z.; Shehab, F.; Zaed, A.<br>A Nejadi; F Ajaminejad; F Ajaminejad and T Mokhtari Azad; J Yavarian; K Sadeghi; N Ghavvami; N Ghavvami and T Mokhtari Azad; NZ Shafei Jandaghi; V Salimi                                                                                                                                                                                                                                                                                                                                                                                       |

|                                                                                                                                                                                                                                                                                                 |                                                                                                                                         |                                                                                                                                                                                                  |  |                                                                                                                                                                                                                                                                                                                                                                                                                                                                                                                                                                                                                                                                                                                                                              |
|-------------------------------------------------------------------------------------------------------------------------------------------------------------------------------------------------------------------------------------------------------------------------------------------------|-----------------------------------------------------------------------------------------------------------------------------------------|--------------------------------------------------------------------------------------------------------------------------------------------------------------------------------------------------|--|--------------------------------------------------------------------------------------------------------------------------------------------------------------------------------------------------------------------------------------------------------------------------------------------------------------------------------------------------------------------------------------------------------------------------------------------------------------------------------------------------------------------------------------------------------------------------------------------------------------------------------------------------------------------------------------------------------------------------------------------------------------|
| EPI_ISL_2285849, EPI_ISL_2285850, EPI_ISL_2285852, EPI_ISL_2285853, EPI_ISL_2285855, EPI_ISL_2285864, EPI_ISL_2285869, EPI_ISL_2535795, EPI_ISL_2535796, EPI_ISL_2873841, EPI_ISL_2873845, EPI_ISL_2873850, EPI_ISL_2873858, EPI_ISL_2873860, EPI_ISL_2873865, EPI_ISL_2873870, EPI_ISL_2873872 |                                                                                                                                         |                                                                                                                                                                                                  |  | Benjamin B. Lindsey; Benjamin H. Foulkes; Dennis Laryea; Ernest Asiedu; Franklin Asiedu-Bekoe; Gordon Awandare; Ivy A. Asante; Joseph Oliver-Commy; Joyce Ngoli; Linda Boatemaa; Lorreta Kwasa; Mathew D. Parker; Michael Marks; Mildred Adusei-Poku; Sharon Hsu; Thushan I de Silva; William K. Ampofo                                                                                                                                                                                                                                                                                                                                                                                                                                                      |
| see above                                                                                                                                                                                                                                                                                       | National Influenza Centre                                                                                                               | National Influenza Centre                                                                                                                                                                        |  |                                                                                                                                                                                                                                                                                                                                                                                                                                                                                                                                                                                                                                                                                                                                                              |
| EPI_ISL_476838                                                                                                                                                                                                                                                                                  | National Influenza Centre for Northern Greece                                                                                           | National Influenza Centre for Northern Greece                                                                                                                                                    |  | Maria Christoforidi                                                                                                                                                                                                                                                                                                                                                                                                                                                                                                                                                                                                                                                                                                                                          |
| EPI_ISL_410301                                                                                                                                                                                                                                                                                  | National Influenza Centre, National Public Health Laboratory, Kathmandu, Nepal                                                          | The University of Hong Kong                                                                                                                                                                      |  | Alfonso J. Rodriguez-Morales; Anup Bastola; Basu Dev Pandey; Bibek Kumar Lal; Daniel Chu; Haogao Gu; Leo Poon; Malik Peiris; Ranjit Sah; Runa Jha                                                                                                                                                                                                                                                                                                                                                                                                                                                                                                                                                                                                            |
| EPI_ISL_402125                                                                                                                                                                                                                                                                                  | National Institute for Communicable Disease Control and Prevention (ICDC) Chinese Center for Disease Control and Prevention (China CDC) | National Institute for Communicable Disease Control and Prevention (ICDC) Chinese Center for Disease Control and Prevention (China CDC)                                                          |  | Chen; Dai; F.-H.; Hu, Y.; J.-H.; J.-J.; J.-L. and Zhu; Liu, Y.; Pei; Q.-M.; She; Song; T.-Y.; Tao; Tian; Wang; Wang, W.; Wu, F.; Xu, L.; Y.-L.; Y.-M.; Y.-Y.; Y.-Z.; Yu, B.; Z.-G.; Z.-W.; Zhang; Zhao, S.; Zheng                                                                                                                                                                                                                                                                                                                                                                                                                                                                                                                                            |
| EPI_ISL_450297, EPI_ISL_450299, EPI_ISL_450300, EPI_ISL_450301, EPI_ISL_450495, EPI_ISL_470878, EPI_ISL_490281, EPI_ISL_514417, EPI_ISL_514419, EPI_ISL_515177, EPI_ISL_622930, EPI_ISL_2433725, EPI_ISL_2433832, EPI_ISL_2433834, EPI_ISL_2444005, EPI_ISL_2444020, EPI_ISL_2662723            | see above                                                                                                                               | National Institute for Communicable Diseases of the National Health Laboratory Service                                                                                                           |  | Allam M; Amoako DG; Bhiman JN; Everatt J; Ismail A; Khumalo Z; Kwenda S; Mahlangu B; Mnguni A; Mnyameni F; Mohale T; Mtshali P; Ntuli N; Scheepers C; Subramoney K; van Heusden P                                                                                                                                                                                                                                                                                                                                                                                                                                                                                                                                                                            |
| EPI_ISL_1914886, EPI_ISL_1914931                                                                                                                                                                                                                                                                | National Institute for Communicable Diseases, National Health Laboratory Services, Gauteng, South Africa                                | National Institute for Communicable Diseases of the National Health Laboratory Service                                                                                                           |  | Amoako DG; Bhiman JN; Ismail A; Mahlangu B; Mohale T; Ntuli N; Scheepers C                                                                                                                                                                                                                                                                                                                                                                                                                                                                                                                                                                                                                                                                                   |
| EPI_ISL_1911458                                                                                                                                                                                                                                                                                 | National Institute for Food and Veterinary Risk Assessment (NMVRVI)                                                                     | National Public Health Surveillance Laboratory                                                                                                                                                   |  | Ana Stepankiene; Danas Baksa; Jelena Razmk; Lukas Vasionis; Lukas Zemaits; Migle Gabrielaite; Svajune Muralyte                                                                                                                                                                                                                                                                                                                                                                                                                                                                                                                                                                                                                                               |
| EPI_ISL_469254                                                                                                                                                                                                                                                                                  | National Institute for Viral Disease Control and Prevention, China CDC                                                                  | Institute of Viral Disease Control and Prevention, China CDC                                                                                                                                     |  | Chun Huang; Dayan Wang; George Fu Gao; Guizhen Wu; Li Zhao; Lijuan Chen; Peihua Niu, Baoying Huang; Roujian Lu; Wenbo Xu; Wenjie Tan; Wenling Wang; Yubai Bi                                                                                                                                                                                                                                                                                                                                                                                                                                                                                                                                                                                                 |
| EPI_ISL_591270, EPI_ISL_591276, EPI_ISL_850947, EPI_ISL_850949                                                                                                                                                                                                                                  | National Institute for Infectious Diseases Control and Prevention, China CDC                                                            | National Institute for Viral Disease Control and Prevention, China CDC                                                                                                                           |  | Cao Chen; Dayan Wang; George F.Gao; Hong Wang; Huilai Ma; Ji Wang; Jingdong Song; Jun Han; Kai Nie; Ruqin Gao; Shihwen Wang; Weimin Zhou; Wenbo Xu; Wenjie Tan; Xiang Zhao; Yang Song; Yanhai Wang; Yao Meng; Yanan Feng; Yong Zhang; Yuchao Wu; Zhaoguo Wang; Zhixiao Chen                                                                                                                                                                                                                                                                                                                                                                                                                                                                                  |
| EPI_ISL_709542                                                                                                                                                                                                                                                                                  | National Institute of Blood Diseases (NIBD), Molecular Biology Lab                                                                      | Genomics Lab NIBD                                                                                                                                                                                |  | Aneeta Shahni; Arshi Naz; Gul Sufaida; Samina Naz Mukry; Sayed Ali Raza; Shariq Ahmed; Tahir Sultan Shamsi                                                                                                                                                                                                                                                                                                                                                                                                                                                                                                                                                                                                                                                   |
| EPI_ISL_2107094, EPI_ISL_2107095, EPI_ISL_2107098, EPI_ISL_2308255, EPI_ISL_2308256, EPI_ISL_2308259                                                                                                                                                                                            | National Institute of Health (NIH) - Federal Government of Somalia                                                                      | African Centre of Excellence for Genomics of Infectious Diseases (ACEGID), Redeemer's University                                                                                                 |  | A.T.; Abechi; Ajogbasile; Akano; C.A.; C.T.; Eromon; F.V.; Folarin, O.; Happi; I.B.; J.N.; J.U.; K.O.; Kayode; Nosamiefan, I.; Oguzie; Olawoye; Olumade; Oluniyi; P.E.; P.S.; T.J.; Ugwu; Uwanibe                                                                                                                                                                                                                                                                                                                                                                                                                                                                                                                                                            |
| EPI_ISL_83130, EPI_ISL_1915513                                                                                                                                                                                                                                                                  | National Institute of Health Research and Development                                                                                   | National Institute of Health Research and Development                                                                                                                                            |  | A; AA; Adam; Agustinsihing; Arie Ardiansyah Nugraha; F; Fauzul Muna; Febriyani; Febriyanti; HA; HD; Hana Aparsi Pawestri; Hariastuti; Hartanti Dian Ikawati; Herman; Herna; Holy Arif Wibowo; IL; Ikawati; Indalao; Irene Lorinda Indalao; J; K; KD; KN; Kartika Dewi Puspa; Kindi Adam; Kipuw; Krisna Nur Andriana Pangesti; Kurniawati; Muna; Mursinah; N; NI; NK; NL; Natalie Laurencia Kipuw; Nelly Pusantari; Ni Ketut Susilari; Nike Susanti; Nikmah; Nugraha; Nurika Hariastuti; Pangesti; Pawestri; Puspa; Puspandari; R; Ramadhany; Reni Herman; Ririn Ramadhany; Rizki; Rukmiyanti; Setiaway; Soekrang; Subangkit; Susanti; Susilari; T; Tati; Febriyanti; Triyani Soekarso; UA; Ulyly Alfi Nikmah; V; Vivi Setiawaty.; Wibowo; Y; Yuni Rukminiati |
| EPI_ISL_985395, EPI_ISL_1116455, EPI_ISL_1279947, EPI_ISL_1279951, EPI_ISL_1279953, EPI_ISL_1279966, EPI_ISL_1279972, EPI_ISL_2190103, EPI_ISL_2308251, EPI_ISL_2932503                                                                                                                         | see above                                                                                                                               | National Institute of Infectious Diseases-Prof. Dr. Matej Bals Molecular Diagnostics Laboratory                                                                                                  |  | Andreea Tudor; Corina Casangiu; Dan Otelea; Leontina Banica; Marius Surleac; Ovidiu Vlaicu; Petre Milu; Robert Hohan; Simona Paraschiv                                                                                                                                                                                                                                                                                                                                                                                                                                                                                                                                                                                                                       |
| EPI_ISL_943552, EPI_ISL_955172, EPI_ISL_2796523, EPI_ISL_2796527                                                                                                                                                                                                                                | National Institute of Laboratory Medicine and Referral Center                                                                           | Genomic Research Lab, BCSIR                                                                                                                                                                      |  | A. K. M. Shamsuzzaman; A. K. M. Shamsuzzaman; Abu Sayeed Mohammad Mahmud; Arifa Akram; Ashish Kumar Ghosh; Barna Goswami; Eshrah Osman; Iffat Jahana; Mahmuda Yeasmin; Md. Ahasan Habib; Md. Ahasan Habib; Md. Kamrul Islam; Md. Maruf Ahmed Molla; Md. Murshed Hasan Sarkar; Md. Saddam Hossain; Md. Salim Khan; Md. Salim Khan.; Mohammad Mohi Uddin; Mohammad Samir Uzzaman; Shahina Akter; Tanjina Akhtar Banu; Tanjina Akhter Banu; Tasnim Nafisa; Tasnim Nafisa                                                                                                                                                                                                                                                                                        |
| EPI_ISL_2323222, EPI_ISL_2323258, EPI_ISL_2380403                                                                                                                                                                                                                                               | National Institute of Public Health                                                                                                     | Charles University, Faculty of Science, BIOCEV, OMICS Genomics                                                                                                                                   |  | Blanka Hamplová; Ingrid Polisková; Jana Šmahelová; Jiří Novák; Magdalena Jančářová; Ruth Tachezy; Sebastian Cristian Treitli; Vladimír Hampl; Zoltán Fűssy; Štěpánka Hrdá                                                                                                                                                                                                                                                                                                                                                                                                                                                                                                                                                                                    |
| EPI_ISL_2709618, EPI_ISL_2709627                                                                                                                                                                                                                                                                | National Institute of Public Health                                                                                                     | Institute of Molecular Genetics CAS                                                                                                                                                              |  | Jan Pačes; Jana Šáchová; Lucie Pfeiferová; Martin Zmuda; Michal Kolář; Miluše Hradilová; Ondřej Moravčík                                                                                                                                                                                                                                                                                                                                                                                                                                                                                                                                                                                                                                                     |
| EPI_ISL_2687993                                                                                                                                                                                                                                                                                 | National Institute of Public Health                                                                                                     | National Institute of Infectious Diseases-Prof. Dr. Matej Bals Molecular Diagnostics Laboratory                                                                                                  |  | Corina Casangiu; Dan Otelea; Leontina Banica; Marius Surleac; Petre Milu; Robert Hohan; Simona Paraschiv                                                                                                                                                                                                                                                                                                                                                                                                                                                                                                                                                                                                                                                     |
| EPI_ISL_1492241, EPI_ISL_2324674, EPI_ISL_2324821, EPI_ISL_2324940                                                                                                                                                                                                                              | National Institute of Public Health                                                                                                     | National Institute of Public Health                                                                                                                                                              |  | Alexander Nagy; Dusan Trnka; Helena Jirincova; Jaromira Vecerova; Timotej Suri                                                                                                                                                                                                                                                                                                                                                                                                                                                                                                                                                                                                                                                                               |
| EPI_ISL_1828716, EPI_ISL_1828718, EPI_ISL_1828724, EPI_ISL_1971075, EPI_ISL_2562079                                                                                                                                                                                                             | National Institute of Public Health                                                                                                     | State Veterinary Institute Prague                                                                                                                                                                |  | A; D; H; J; Jirincova; Nagy; Suri; T; Trnka; Vecerova                                                                                                                                                                                                                                                                                                                                                                                                                                                                                                                                                                                                                                                                                                        |
| EPI_ISL_2928004, EPI_ISL_2928005, EPI_ISL_2928006, EPI_ISL_2928007, EPI_ISL_2928008, EPI_ISL_2928009, EPI_ISL_2928010, EPI_ISL_2928011, EPI_ISL_2928012                                                                                                                                         | see above                                                                                                                               | National Institute of Public Health Burundi, WHO Burundi, ASLM Burundi, MRC/UVRI & LSHTM Uganda Research Unit                                                                                    |  | Alexis Nyimwungere; Anatole Nkeshimana; Blessing T. Marondera; Butoyi Pascal; Cassien Nduwimana; Dan Lule Bugembe; Eric Kezakarayagwa; Francine Kabatesi; Jean Baptiste Niyibigira; Jerome Ndaruhutse; Jerome Nkurunziza; Joseph Nyandwi; Kouadio Theodore Yao; Matthew Cotten; My V.T. Phan; Xavier Crespin                                                                                                                                                                                                                                                                                                                                                                                                                                                 |
| EPI_ISL_1335479, EPI_ISL_1335489                                                                                                                                                                                                                                                                | National Laboratory for Health, Environment and Food, OMM, Celje                                                                        | CISLD (Clinical Institute of Special Laboratory Diagnostics), University Children's Hospital, University Medical Center Ljubljana                                                                |  | Ana Grom; Barbara Jenko Bizjan; Jernej Kovač; Katarina Kozmos; Marko Pokorn; Maruša Debeljak; Robert Šket; Tadej Battelino; Tine Tesovnik                                                                                                                                                                                                                                                                                                                                                                                                                                                                                                                                                                                                                    |
| EPI_ISL_1664811, EPI_ISL_2001884                                                                                                                                                                                                                                                                | National Laboratory for Health, Environment and Food, OMM, Celje                                                                        | NLZOH (National Laboratory for Health, Environment and Food) / CISLD (Clinical Institute of Special Laboratory Diagnostics), University Children's Hospital, University Medical Center Ljubljana |  | Aleksander Kocuvan; Aleksander Mahnic; Alenka Štorman; Ana Grom; Barbara Jenko Bizjan; Daša Kavka / Jernej Kovač; Kaja Tominc; Katarina Kozmos; Maja Rupnik; Marko Pokorn; Maruša Debeljak; Mateja Borinc; Maša Jarčič; Nika Gobec; Robert Šket; Sandra Janežic; Tadej Battelino; Tine Tesovnik; Tjaša Zohar Čretnik                                                                                                                                                                                                                                                                                                                                                                                                                                         |
| EPI_ISL_2789267, EPI_ISL_2983030                                                                                                                                                                                                                                                                | National Laboratory for Health, Environment and Food, OMM, Koper                                                                        | NLZOH (National Laboratory for Health, Environment and Food) / CISLD (Clinical Institute of Special Laboratory Diagnostics), University Children's Hospital, University Medical Center Ljubljana |  | Aleksander Kocuvan; Aleksander Mahnic; Alenka Štorman; Ana Grom; Barbara Jenko Bizjan; Gašper Štrugar; Kaja Tominc; Katarina Kozmos; Maja Rupnik; Marko Pokorn; Maruša Debeljak; Maša Jarčič; Mitja Rak / Jernej Kovač; Nika Gobec; Robert Šket; Sandra Janežic; Tadej Battelino; Tina Cvetković; Tine Tesovnik; Tjaša Zohar Čretnik                                                                                                                                                                                                                                                                                                                                                                                                                         |
| EPI_ISL_2162621                                                                                                                                                                                                                                                                                 | National Laboratory for Health, Environment and Food, OMM, Kranj                                                                        | NLZOH (National Laboratory for Health, Environment and Food) / CISLD (Clinical Institute of Special Laboratory Diagnostics), University Children's Hospital, University Medical Center Ljubljana |  | Aleksander Kocuvan; Aleksander Mahnic; Alenka Štorman; Ana Grom; Barbara Jenko Bizjan; Kaja Tominc; Katarina Kozmos; Maja Rupnik; Marjana Petrevčič / Jernej Kovač; Marko Pokorn; Maruša Debeljak; Mateja Ravnik; Maša Jarčič; Monika Korosec; Nika Gobec; Robert Šket; Sandra Janežic; Tadej Battelino; Tine Tesovnik; Tjaša Zohar Čretnik                                                                                                                                                                                                                                                                                                                                                                                                                  |
| EPI_ISL_1111786, EPI_ISL_1111889                                                                                                                                                                                                                                                                | National Laboratory for Health, Environment and Food, OMM, Maribor                                                                      | CISLD (Clinical Institute of Special Laboratory Diagnostics), University Children's Hospital, University Medical Center Ljubljana                                                                |  | Ana Grom; Barbara Jenko Bizjan; Jernej Kovač; Katarina Kozmos; Marko Pokorn; Maruša Debeljak; Robert Šket; Tadej Battelino; Tine Tesovnik                                                                                                                                                                                                                                                                                                                                                                                                                                                                                                                                                                                                                    |
| EPI_ISL_1664818, EPI_ISL_2162480, EPI_ISL_2162562, EPI_ISL_2162583, EPI_ISL_2463348, EPI_ISL_2463442, EPI_ISL_2789297, EPI_ISL_2982921                                                                                                                                                          | see above                                                                                                                               | National Laboratory for Health, Environment and Food) / CISLD (Clinical Institute of Special Laboratory Diagnostics), University Children's Hospital, University Medical Center Ljubljana        |  | Aleksander Kocuvan; Aleksander Mahnic; Alenka Štorman; Ana Grom; Andrej Golle / Jernej Kovač; Barbara Jenko Bizjan; Kaja Tominc; Katarina Kozmos; Maja Rupnik; Marko Pokorn; Maruša Debeljak; Maša Jarčič; Mojca Cimerman; Nika Gobec; Nika Volmajer; Robert Šket; Sandra Janežic; Tadej Battelino; Tine Tesovnik; Tjaša Zohar Čretnik; Tjaša Zohar Čretnik                                                                                                                                                                                                                                                                                                                                                                                                  |
| EPI_ISL_2789283                                                                                                                                                                                                                                                                                 | National Laboratory for Health, Environment and Food, OMM, Novo mesto                                                                   | NLZOH (National Laboratory for Health, Environment and Food) / CISLD (Clinical Institute of Special Laboratory Diagnostics), University Children's Hospital, University Medical Center Ljubljana |  | Aleksander Kocuvan; Aleksander Mahnic; Alenka Štorman; Ana Grom; Barbara Jenko Bizjan; David Cvetko; Kaja Tominc; Katarina Kozmos; Maja Rupnik; Marko Pokorn; Maruša Debeljak; Matjaž Retelj / Jernej Kovač; Maša Jarčič; Nika Gobec; Robert Šket; Sandra Janežic; Tadej Battelino; Tatjana Harlander; Tine Tesovnik; Tjaša Zohar Čretnik                                                                                                                                                                                                                                                                                                                                                                                                                    |
| EPI_ISL_512612, EPI_ISL_512613, EPI_ISL_512636                                                                                                                                                                                                                                                  | National Laboratory for Influenza/Virology reference laboratory, Public Health Center of the Ministry of Health of Ukraine              | Respiratory Virus Unit, Microbiology Services Colindale, Public Health England                                                                                                                   |  | Dr. Iryna Demchyshyna; PHE Covid Sequencing Team                                                                                                                                                                                                                                                                                                                                                                                                                                                                                                                                                                                                                                                                                                             |
| EPI_ISL_647980, EPI_ISL_1191831, EPI_ISL_1191921, EPI_ISL_1192066                                                                                                                                                                                                                               | National Microbiology Reference Laboratory                                                                                              | Quadram Institute Bioscience                                                                                                                                                                     |  | Agnes Juru; Alexander Goredema; Ana-Victoria Gutierrez; Andrew J. Page; Andrew Tarupia; Barbra Murwira; Beuty Makamure; Charles Nyagupe; David Baker; Faustinos T Takawira; Gaetan Thilliez; Gemma Kay; Gibson Mhlanga; Hlanai Gumbo; Isaac Phiri; Justin O'Grady; Kenneth K Maeka; Leonardo de Oliveira Martins; Muchaneta Mugabe; Portia Managazira; Raiva Simbi; Robert Kingsley; Sekesai Zinyowera; Tapfumane Mashhe; Tatenda Takawira; Thank Le Viet                                                                                                                                                                                                                                                                                                    |
| EPI_ISL_2492582, EPI_ISL_2492707, EPI_ISL_2492718, EPI_ISL_2492732, EPI_ISL_2492775, EPI_ISL_2492860, EPI_ISL_2492916                                                                                                                                                                           |                                                                                                                                         |                                                                                                                                                                                                  |  |                                                                                                                                                                                                                                                                                                                                                                                                                                                                                                                                                                                                                                                                                                                                                              |

|                                                                                                                                                                                                                         |                                                                                                                                                                                                                                                                                                                                                                                                                                                                                                                                                                                                                                                                                                                                                                                                                                             |                                                                                                                                              |                                                                                                                                                                                                                                                                                  |
|-------------------------------------------------------------------------------------------------------------------------------------------------------------------------------------------------------------------------|---------------------------------------------------------------------------------------------------------------------------------------------------------------------------------------------------------------------------------------------------------------------------------------------------------------------------------------------------------------------------------------------------------------------------------------------------------------------------------------------------------------------------------------------------------------------------------------------------------------------------------------------------------------------------------------------------------------------------------------------------------------------------------------------------------------------------------------------|----------------------------------------------------------------------------------------------------------------------------------------------|----------------------------------------------------------------------------------------------------------------------------------------------------------------------------------------------------------------------------------------------------------------------------------|
| see above                                                                                                                                                                                                               | National Microbiology Reference Laboratory, Ministry of Health, Harare, Zimbabwe                                                                                                                                                                                                                                                                                                                                                                                                                                                                                                                                                                                                                                                                                                                                                            | CERI, Centre for Epidemic Response and Innovation, Stellenbosch University and KRISP, KZN Research Innovation and Sequencing Platform, UKZN. | Agnes Juru; Air Comodor Dr J. Chimedza; Charles Nyagupe; Dr Raiva Simbi; Emmanuel SJ; Giandhari J; Hlanai Gumbo; Kenneth Maeka; Naidoo Y; Pillay S; Tafummanei Mashe; Tatenda Takawira; Tegally H; Wilkinson E; de Oliveira T                                                    |
| EPI_ISL_1095620<br>EPI_ISL_2479956<br>EPI_ISL_2479957<br>EPI_ISL_2479972<br>EPI_ISL_2479975<br>EPI_ISL_2479981<br>EPI_ISL_2479985                                                                                       | National Public Health Center, COVID Laboratory<br>National Public Health Laboratory                                                                                                                                                                                                                                                                                                                                                                                                                                                                                                                                                                                                                                                                                                                                                        | National Public Health Center, National Biosafety Laboratory<br>CSIR-Institute of Genomics and Integrative Biology                           | Bernadett Pályi; Dániel Déri; Judit Henczkó; Norbert Solymosi; Nóra Magyar; Zoltán Kis<br>Jyoti Acharya; Lokbandhu Chaudhary; Priya Jha; Runa Jha; Suni Dangol                                                                                                                   |
| EPI_ISL_2674091<br>EPI_ISL_2674102                                                                                                                                                                                      | National Public Health Laboratory                                                                                                                                                                                                                                                                                                                                                                                                                                                                                                                                                                                                                                                                                                                                                                                                           | National Public Health Laboratory/CSIR-Institute of Genomics and Integrative Biology                                                         | National Public Health Laboratory Team                                                                                                                                                                                                                                           |
| EPI_ISL_845548<br>EPI_ISL_845549<br>EPI_ISL_845550<br>EPI_ISL_845551<br>EPI_ISL_845563                                                                                                                                  | National Public Health Laboratory, Cameroon                                                                                                                                                                                                                                                                                                                                                                                                                                                                                                                                                                                                                                                                                                                                                                                                 | African Centre of Excellence for Genomics of Infectious Diseases (ACEGID), Redeemer's University                                             | Oluniyi P.E. et al                                                                                                                                                                                                                                                               |
| EPI_ISL_2450778<br>EPI_ISL_2450783<br>EPI_ISL_2450789<br>EPI_ISL_2450791                                                                                                                                                | National Public Health Laboratory, Ministry of Health, Ministry of Health, Republic of South Sudan                                                                                                                                                                                                                                                                                                                                                                                                                                                                                                                                                                                                                                                                                                                                          | South Sudan Ministry of Health, WHO South Sudan, MRC/UVRI & LSHTM Uganda Research Unit                                                       | Abe G. Abias; Dan Lule Bugembe; Dennis Kenyi Lodiongo; James Ayei; John Rumunu; Joseph Francis Wamala; Juma John HM; Lu Lujok Deng; Matthew Cotten; My V.T. Phan; Pontiano Kaleebu; Richard Lino Loro Lako; Sudhir Bunga                                                         |
| EPI_ISL_428822<br>EPI_ISL_1652095<br>EPI_ISL_2621955<br>EPI_ISL_2710081<br>EPI_ISL_2790332<br>EPI_ISL_2887792<br>EPI_ISL_2982247<br>EPI_ISL_3026034                                                                     | EPI_ISL_428830, EPI_ISL_428841, EPI_ISL_435678, EPI_ISL_435686, EPI_ISL_462300, EPI_ISL_493408, EPI_ISL_498594, EPI_ISL_498599, EPI_ISL_516827, EPI_ISL_536427, EPI_ISL_536432, EPI_ISL_548976, EPI_ISL_574541, EPI_ISL_626631, EPI_ISL_626636, EPI_ISL_645124, EPI_ISL_693316, EPI_ISL_693328, EPI_ISL_754076, EPI_ISL_754080, EPI_ISL_1098834, EPI_ISL_1519384, EPI_ISL_1652095, EPI_ISL_1652199, EPI_ISL_1704809, EPI_ISL_1816946, EPI_ISL_1816953, EPI_ISL_1816955, EPI_ISL_1897609, EPI_ISL_2349711, EPI_ISL_2349779, EPI_ISL_2349819, EPI_ISL_2349865, EPI_ISL_2508703, EPI_ISL_2508993, EPI_ISL_2508995, EPI_ISL_2509024, EPI_ISL_2509025, EPI_ISL_2509028, EPI_ISL_2509091, EPI_ISL_2621909, EPI_ISL_2621948, EPI_ISL_2621955, EPI_ISL_2710081, EPI_ISL_2790332, EPI_ISL_2887792, EPI_ISL_2982247, EPI_ISL_2982249, EPI_ISL_3026034 |                                                                                                                                              |                                                                                                                                                                                                                                                                                  |
| see above                                                                                                                                                                                                               | National Public Health Laboratory, National Centre for Infectious Diseases                                                                                                                                                                                                                                                                                                                                                                                                                                                                                                                                                                                                                                                                                                                                                                  | National Public Health Laboratory, National Centre for Infectious Diseases                                                                   | Chavatte JM; Chavatte Jean-Marc; Cui L; Cui Lin; Grace Jie Yin Ngan; Katherine Ching; Lin Cui; Lin RTP; Lin Raymond Tzer Pin; Mak TM; Mak Tze Minn; Octavia S; Octavia Sophie; Raymond Tzer Pin Lin; Royce Ang; Sophie Octavia; Tze Minn Mak; Zhenyang Zhou;                     |
| EPI_ISL_2674074                                                                                                                                                                                                         | National Public Health Laboratory/B.P Koirala Institute of Health Science                                                                                                                                                                                                                                                                                                                                                                                                                                                                                                                                                                                                                                                                                                                                                                   | National Public Health Laboratory/CSIR-Institute of Genomics and Integrative Biology                                                         | National Public Health Laboratory Team /B.P Koirala Institute of Health Science COVID 19 PCR Team                                                                                                                                                                                |
| EPI_ISL_2674069                                                                                                                                                                                                         | National Public Health Laboratory/Palpa Hospital/COVID-19 Lab                                                                                                                                                                                                                                                                                                                                                                                                                                                                                                                                                                                                                                                                                                                                                                               | National Public Health Laboratory/CSIR-Institute of Genomics and Integrative Biology                                                         | National Public Health Laboratory Team /Palpa Hospital/COVID-19 PCR Team                                                                                                                                                                                                         |
| EPI_ISL_2674065                                                                                                                                                                                                         | National Public Health Laboratory/Pokhara Academy of Health Sciences                                                                                                                                                                                                                                                                                                                                                                                                                                                                                                                                                                                                                                                                                                                                                                        | National Public Health Laboratory/CSIR-Institute of Genomics and Integrative Biology                                                         | National Public Health Laboratory Team /Pokhara Academy of Health Sciences COVID 19 PCR Team                                                                                                                                                                                     |
| EPI_ISL_2674086                                                                                                                                                                                                         | National Public Health Laboratory/Provincial Public Health Laboratory -2                                                                                                                                                                                                                                                                                                                                                                                                                                                                                                                                                                                                                                                                                                                                                                    | National Public Health Laboratory/CSIR-Institute of Genomics and Integrative Biology                                                         | National Public Health Laboratory Team /Provincial Public Health Laboratory -2 Team                                                                                                                                                                                              |
| EPI_ISL_2674070                                                                                                                                                                                                         | National Public Health Laboratory/Provincial Public Health Laboratory -Gandaki                                                                                                                                                                                                                                                                                                                                                                                                                                                                                                                                                                                                                                                                                                                                                              | National Public Health Laboratory/CSIR-Institute of Genomics and Integrative Biology                                                         | National Public Health Laboratory Team /Provincial Public Health Laboratory -Gandaki Team                                                                                                                                                                                        |
| EPI_ISL_2674108                                                                                                                                                                                                         | National Public Health Laboratory/Provincial Public Health Laboratory -Lumbini                                                                                                                                                                                                                                                                                                                                                                                                                                                                                                                                                                                                                                                                                                                                                              | National Public Health Laboratory/CSIR-Institute of Genomics and Integrative Biology                                                         | National Public Health Laboratory Team /Provincial Public Health Laboratory -Lumbini Team                                                                                                                                                                                        |
| EPI_ISL_2349378<br>EPI_ISL_480301<br>EPI_ISL_480304                                                                                                                                                                     | National Reference Centre for Retroviruses<br>National Reference Laboratory "Influenza and acute respiratory diseases"                                                                                                                                                                                                                                                                                                                                                                                                                                                                                                                                                                                                                                                                                                                      | Central Public Health Laboratory<br>NRL-HIV                                                                                                  | Gkikas Magiorkinis et al<br>Ivailo Alexiev; Ivan Ivanov; Ivva Philipova                                                                                                                                                                                                          |
| EPI_ISL_1273394<br>EPI_ISL_1273395<br>EPI_ISL_1273396<br>EPI_ISL_1273399<br>EPI_ISL_1273406<br>EPI_ISL_1273408                                                                                                          | National Reference Laboratory - Ministry of Health Maseru Lesotho                                                                                                                                                                                                                                                                                                                                                                                                                                                                                                                                                                                                                                                                                                                                                                           | National Institute for Communicable Diseases of the National Health Laboratory Service                                                       | Amoako DG; Banda R; Bhiman JN; Gorova V; Ismail A; Mahlangu B; Mathabo M; Mohale T; Mooko M; Ntuli N; Scheepers C                                                                                                                                                                |
| EPI_ISL_737200<br>EPI_ISL_737201                                                                                                                                                                                        | National Reference Laboratory, Nigeria Centre for Disease Control.                                                                                                                                                                                                                                                                                                                                                                                                                                                                                                                                                                                                                                                                                                                                                                          | National Reference Laboratory, Nigeria Centre for Disease Control, Gaduwa, Abuja, Nigeria                                                    | Akinpelu Afolabi; Anthony Ahumibe; Catherine Okoi; Celestina Obiekea; Chimaobi Chukwu; Dr Adesuyi Omoare; Dr Chikwe Ihekweazu; Dr Chinwe Ochu; Dr Ndodo Nnaemeka; Dr Sikiru Badaru; Grace Esebanmen; Kingsley Njoku; Nwando Mba; Olusola Akanbi; Shirlee Wohi; oluwaseyi Ajege   |
| EPI_ISL_435677<br>EPI_ISL_962877                                                                                                                                                                                        | National Virology Reference Laboratory                                                                                                                                                                                                                                                                                                                                                                                                                                                                                                                                                                                                                                                                                                                                                                                                      | National Public Health Laboratory, National Centre for Infectious Diseases                                                                   | Chavatte Jean-Marc; Cui Lin; Lin Cui; Lin Raymond Tzer Pin; Mak Tze Minn; Octavia Sophie; Raymond Tzer Pin Lin; Taib Surita; Tze Minn Mak; Zaini Zainun; Zhenyang Zhou                                                                                                           |
| EPI_ISL_981252                                                                                                                                                                                                          | National Virus Reference Laboratory                                                                                                                                                                                                                                                                                                                                                                                                                                                                                                                                                                                                                                                                                                                                                                                                         | Irish Coronavirus Sequencing Consortium - Helixworks                                                                                         | Conor Crosbie; Nimesh Pinnamaneni; Sachin Chalapati                                                                                                                                                                                                                              |
| EPI_ISL_500592<br>EPI_ISL_2840952<br>EPI_ISL_2841044<br>EPI_ISL_2862431<br>EPI_ISL_2893050<br>EPI_ISL_2893164<br>EPI_ISL_2932096<br>EPI_ISL_3011232<br>EPI_ISL_3011525<br>EPI_ISL_3030768                               | National Virus Reference Laboratory                                                                                                                                                                                                                                                                                                                                                                                                                                                                                                                                                                                                                                                                                                                                                                                                         | National Virus Reference Laboratory                                                                                                          | Aditi Chaturvedi; Calum Walsh; Charlene Bennet; Charlene Bennett; Cillian F De Gascun; Daniel Hare; Fiona Crispie; Gabriel Gonzalez; Guerrino Macori; Jonathan Dean; Matthew McCabe; Michael Carr; Paul Cotter; Seamus Fanning; Suzie Coughlan; Zoe Yandle                       |
| EPI_ISL_1627088<br>EPI_ISL_2533832<br>EPI_ISL_2533868<br>EPI_ISL_2533869<br>EPI_ISL_2533870<br>EPI_ISL_2533871<br>EPI_ISL_2533872<br>EPI_ISL_2533873<br>EPI_ISL_2533874                                                 | National reference Laboratory, NCDC, Gaduwa, Abuja, Nigeria                                                                                                                                                                                                                                                                                                                                                                                                                                                                                                                                                                                                                                                                                                                                                                                 | National reference Laboratory, NCDC, Gaduwa, Abuja, Nigeria                                                                                  | Akinpelu Afolabi; Anthony Ahumibe; Badaru Sikiru; Catherine Okoi; Celestina Obiekea; Chimaobi Chukwu; Dr Chikwe Ihekweazu; Dr Grace Esebanmen; Dr Ndodo Nnaemeka; Dr Omoare Adesuyi; Kingsley Njoku; Nwando Mba; Olusola Anuoluwapo Akanbi                                       |
| see above                                                                                                                                                                                                               | Naval Medical Research Unit No. 3                                                                                                                                                                                                                                                                                                                                                                                                                                                                                                                                                                                                                                                                                                                                                                                                           | Naval Medical Research Center Biological Defense Research Directorate                                                                        | Andrea E. Luquette; Andrew J. Bennett; Bishwo N. Adhikari; Catherine E. Arnold; Chaselynn M. Watters; Emily K. Stefanov; Francisco Malagon; Kyle A. Long; Logan J. Voegtly; Luis A. Estrella; Michael V. Deschenes; Regina Z. Cer; Stephen M. Egan; and Kimberly A. Bishop-Lilly |
| EPI_ISL_2754090<br>EPI_ISL_2967911                                                                                                                                                                                      | Nebraska Public Health Laboratory                                                                                                                                                                                                                                                                                                                                                                                                                                                                                                                                                                                                                                                                                                                                                                                                           | NPHL COVID-19 Response Team                                                                                                                  | NPHL COVID-19 Response Team                                                                                                                                                                                                                                                      |
| EPI_ISL_754068<br>EPI_ISL_754070                                                                                                                                                                                        | Nepal Korea Friendship Municipality Hospital                                                                                                                                                                                                                                                                                                                                                                                                                                                                                                                                                                                                                                                                                                                                                                                                | Nepal Health Research Council                                                                                                                | Meghnath Dhimal; Pradip Gyanwali                                                                                                                                                                                                                                                 |
| EPI_ISL_515391<br>EPI_ISL_1483251<br>EPI_ISL_1483264<br>EPI_ISL_3021067                                                                                                                                                 | Nevada State Public Health Laboratory                                                                                                                                                                                                                                                                                                                                                                                                                                                                                                                                                                                                                                                                                                                                                                                                       | Nevada State Public Health Laboratory                                                                                                        | Andrew Gorzalski; Chris Laverdure; Cyprian Rossetto; David Jackson; Heather Kerwin; Joel R. Sevinsky; Mark Pandori; Natalie Crawford; Paul Hartley; Richard Tillett; Stephanie Van Hooser; Subhash C. Verma; and Mark Pandori                                                    |
| EPI_ISL_2202898                                                                                                                                                                                                         | New Mexico Department of Health Scientific Laboratory Division                                                                                                                                                                                                                                                                                                                                                                                                                                                                                                                                                                                                                                                                                                                                                                              | Los Alamos National Laboratory Bioscience Division                                                                                           | Alina Deshpande; Cheryl Gleasner; Chien-Chi Lo; Joseph Hicks; Kim McMurtry; Michael Edwards; Migun Shakya; Patrick Chain; Twila Kunde                                                                                                                                            |
| EPI_ISL_1660402<br>EPI_ISL_1660408<br>EPI_ISL_1660411<br>EPI_ISL_1697281<br>EPI_ISL_1756023<br>EPI_ISL_2107449<br>EPI_ISL_2107451<br>EPI_ISL_2107456<br>EPI_ISL_2107457<br>EPI_ISL_2107535<br>EPI_ISL_2811816           | see above                                                                                                                                                                                                                                                                                                                                                                                                                                                                                                                                                                                                                                                                                                                                                                                                                                   | see above                                                                                                                                    | see above                                                                                                                                                                                                                                                                        |
| see above                                                                                                                                                                                                               | New South Wales Health Pathology Royal Prince Alfred Hospital                                                                                                                                                                                                                                                                                                                                                                                                                                                                                                                                                                                                                                                                                                                                                                               | Microbiology RPAH                                                                                                                            | Au, J.; Bull, R.; Deveson, I.; Foster, C.; Rawlinson, W.; Ruiz Silva, M.; Van Hal, S.                                                                                                                                                                                            |
| EPI_ISL_1196008                                                                                                                                                                                                         | Nhlanguano Health Centre                                                                                                                                                                                                                                                                                                                                                                                                                                                                                                                                                                                                                                                                                                                                                                                                                    | National Institute for Communicable Diseases of the National Health Laboratory Service                                                       | Amoako DG; Bhiman JN; Ismail A; Mahlangu B; Maphalala GP; Mohale T; Ntuli N; Scheepers C                                                                                                                                                                                         |
| EPI_ISL_516934                                                                                                                                                                                                          | Nicolae Testemitanu State University of Medicine and Pharmacy                                                                                                                                                                                                                                                                                                                                                                                                                                                                                                                                                                                                                                                                                                                                                                               | International Centre for Genetic Engineering and Biotechnology (ICGEB) and ARGO Open Lab Platform for Genome Sequencing                      | Dal Monego S; Licastro D; Marcello A; Rajasekharan S; Ulincici M                                                                                                                                                                                                                 |
| EPI_ISL_1073639<br>EPI_ISL_1073640<br>EPI_ISL_1381746                                                                                                                                                                   | Nigeria Centre For Disease Control                                                                                                                                                                                                                                                                                                                                                                                                                                                                                                                                                                                                                                                                                                                                                                                                          | National reference Laboratory, NCDC, Gaduwa, Abuja                                                                                           | Anthony Ahumibe; Catherine Okoi; Celestina Obiekea; Chimaobi Chukwu; Dr Chikwe Ihekweazu; Dr Ndodo Nnaemeka; Dr Omoare Adesuyi; Grace Esebanmen; Naidoo Dhamari; Nwando Mba; Olusola Anuoluwapo Akanbi                                                                           |
| EPI_ISL_2565890<br>EPI_ISL_2565894                                                                                                                                                                                      | Nigeria Centre for Disease Control (NCDC)                                                                                                                                                                                                                                                                                                                                                                                                                                                                                                                                                                                                                                                                                                                                                                                                   | Africa Centre for Excellence for Genomics of Infectious Diseases (ACEGID), Redeemer's University                                             | A.T.; Abechi; Ajogbasile; Akano; C.A.; C.T.; Eromon; F.V.; Folarin, O.; Happi; I.B.; J.N.; J.U.; K.O.; Kayode; Nosamiefan, I.; Oguzie; Olawoye; Olumade; Oluniyi; P.E.; P.S.; T.J.; Ugwu; Uwanibe                                                                                |
| EPI_ISL_1970548                                                                                                                                                                                                         | Nigeria Centre for Disease Control (NCDC)                                                                                                                                                                                                                                                                                                                                                                                                                                                                                                                                                                                                                                                                                                                                                                                                   | African Centre for Excellence for Genomics of Infectious Diseases (ACEGID), Redeemer's University                                            | A.T.; Abechi; Ajogbasile; Akano; C.A.; C.T.; Eromon; F.V.; Folarin, O.; Happi; I.B.; J.N.; J.U.; K.O.; Kayode; Oguzie; Olawoye; Olumade; Oluniyi; P.E.; P.S.; T.J.; Ugwu; Uwanibe                                                                                                |
| EPI_ISL_872604<br>EPI_ISL_872608<br>EPI_ISL_872610<br>EPI_ISL_906285<br>EPI_ISL_906297<br>EPI_ISL_941276<br>EPI_ISL_941277<br>EPI_ISL_941279<br>EPI_ISL_941285<br>EPI_ISL_1242022<br>EPI_ISL_1242023<br>EPI_ISL_1242025 | see above                                                                                                                                                                                                                                                                                                                                                                                                                                                                                                                                                                                                                                                                                                                                                                                                                                   | see above                                                                                                                                    | see above                                                                                                                                                                                                                                                                        |
| see above                                                                                                                                                                                                               | Nigeria Centre for Disease Control (NCDC)                                                                                                                                                                                                                                                                                                                                                                                                                                                                                                                                                                                                                                                                                                                                                                                                   | African Centre of Excellence for Genomics of Infectious Diseases (ACEGID), Redeemer's University                                             | Oluniyi P.E. et al                                                                                                                                                                                                                                                               |
| EPI_ISL_455362<br>EPI_ISL_729979<br>EPI_ISL_729982<br>EPI_ISL_729985<br>EPI_ISL_730004<br>EPI_ISL_730016                                                                                                                | see above                                                                                                                                                                                                                                                                                                                                                                                                                                                                                                                                                                                                                                                                                                                                                                                                                                   | see above                                                                                                                                    | see above                                                                                                                                                                                                                                                                        |
| see above                                                                                                                                                                                                               | Nigeria Centre for Disease Control (NCDC)                                                                                                                                                                                                                                                                                                                                                                                                                                                                                                                                                                                                                                                                                                                                                                                                   | African Centre of Excellence for Genomics of Infectious Diseases (ACEGID), Redeemer's University, Ede, Osun State, Nigeria                   | Ajogbasile F.V.; Folarin O.A.; Happi C.T.; Ihekweazu C.; Kayode A.; Oguzie J.; Olawoye I.; Olumade T.; Oluniyi P.E.; Oluniyi P.E. et al; Uwanibe J.                                                                                                                              |
| EPI_ISL_2240754                                                                                                                                                                                                         | Nigeria Centre for Disease Control (NCDC)                                                                                                                                                                                                                                                                                                                                                                                                                                                                                                                                                                                                                                                                                                                                                                                                   | African Centre of Excellence for Genomics of Infectious                                                                                      | A.T.; Abechi; Ajogbasile; Akano; C.A.; C.T.; Eromon; F.V.; Folarin, O.; Happi; I.B.; J.N.; J.U.; K.O.; Kayode; Nosamiefan, I.; Oguzie; Olawoye; Olumade; Oluniyi; P.E.; P.S.; T.J.; Ugwu; Uwanibe                                                                                |

|                                                                                                                                                                                                                                                                                                                                                                                                                                                                                                                                                                                                                                                                                                                                                                                                                                                                                                                                                                                                                                                                                                                                                                                                                                                                                                                                                                                                                                                                                                                                                                                                 |                                                                                                                     |                                                                                                   |                                                                                                                                                                                                                                                                                                        |                                                                                                                                                                                                                                                                                                                                                                                                                                                                                                                                                                                                                  |
|-------------------------------------------------------------------------------------------------------------------------------------------------------------------------------------------------------------------------------------------------------------------------------------------------------------------------------------------------------------------------------------------------------------------------------------------------------------------------------------------------------------------------------------------------------------------------------------------------------------------------------------------------------------------------------------------------------------------------------------------------------------------------------------------------------------------------------------------------------------------------------------------------------------------------------------------------------------------------------------------------------------------------------------------------------------------------------------------------------------------------------------------------------------------------------------------------------------------------------------------------------------------------------------------------------------------------------------------------------------------------------------------------------------------------------------------------------------------------------------------------------------------------------------------------------------------------------------------------|---------------------------------------------------------------------------------------------------------------------|---------------------------------------------------------------------------------------------------|--------------------------------------------------------------------------------------------------------------------------------------------------------------------------------------------------------------------------------------------------------------------------------------------------------|------------------------------------------------------------------------------------------------------------------------------------------------------------------------------------------------------------------------------------------------------------------------------------------------------------------------------------------------------------------------------------------------------------------------------------------------------------------------------------------------------------------------------------------------------------------------------------------------------------------|
| EPI_ISL_2285324                                                                                                                                                                                                                                                                                                                                                                                                                                                                                                                                                                                                                                                                                                                                                                                                                                                                                                                                                                                                                                                                                                                                                                                                                                                                                                                                                                                                                                                                                                                                                                                 |                                                                                                                     | Diseases (ACEGID), Redeemer's University                                                          |                                                                                                                                                                                                                                                                                                        |                                                                                                                                                                                                                                                                                                                                                                                                                                                                                                                                                                                                                  |
| EPI_ISL_1093445, EPI_ISL_1093475                                                                                                                                                                                                                                                                                                                                                                                                                                                                                                                                                                                                                                                                                                                                                                                                                                                                                                                                                                                                                                                                                                                                                                                                                                                                                                                                                                                                                                                                                                                                                                | Nigerian Centre for Disease Control (NCDC)                                                                          | African Centre of Excellence for Genomics of Infectious Diseases (ACEGID), Redeemer's University  |                                                                                                                                                                                                                                                                                                        | I.B.; Olowoye; et al                                                                                                                                                                                                                                                                                                                                                                                                                                                                                                                                                                                             |
| EPI_ISL_2230650                                                                                                                                                                                                                                                                                                                                                                                                                                                                                                                                                                                                                                                                                                                                                                                                                                                                                                                                                                                                                                                                                                                                                                                                                                                                                                                                                                                                                                                                                                                                                                                 | Nobilis                                                                                                             | Nobilis                                                                                           |                                                                                                                                                                                                                                                                                                        | June Kang; Katharine Jennings; Lauren Brinkac; Lee F. Kolakowski; Shane Mitchell; Shiela Diepold; William M. Nelson                                                                                                                                                                                                                                                                                                                                                                                                                                                                                              |
| EPI_ISL_2645140                                                                                                                                                                                                                                                                                                                                                                                                                                                                                                                                                                                                                                                                                                                                                                                                                                                                                                                                                                                                                                                                                                                                                                                                                                                                                                                                                                                                                                                                                                                                                                                 | NordLab Kokkola                                                                                                     | Expert Microbiology, National Institute for Health and Welfare                                    |                                                                                                                                                                                                                                                                                                        | Carita Savolainen-Kopra; Erika Lindh; Haider al-Hello; Jani Halkilahti; Kirsi Liitsola; Niina Ikonen; Olli Vapalahti; Pekka Ellonen; Phuoc Truong; Päivi Laurila; Ravi Kant; Sari Hannula; Soile Blomqvist; Teemu Smura                                                                                                                                                                                                                                                                                                                                                                                          |
| EPI_ISL_2507749, EPI_ISL_2507872, EPI_ISL_2507873, EPI_ISL_2507875, EPI_ISL_2507876, EPI_ISL_2645166, EPI_ISL_3020668                                                                                                                                                                                                                                                                                                                                                                                                                                                                                                                                                                                                                                                                                                                                                                                                                                                                                                                                                                                                                                                                                                                                                                                                                                                                                                                                                                                                                                                                           | NordLab Oulu                                                                                                        | Expert Microbiology, National Institute for Health and Welfare                                    |                                                                                                                                                                                                                                                                                                        | Carita Savolainen-Kopra; Erika Lindh; Haider al-Hello; Jani Halkilahti; Kirsi Liitsola; Niina Ikonen; Olli Vapalahti; Pekka Ellonen; Phuoc Truong; Päivi Laurila; Ravi Kant; Sari Hannula; Soile Blomqvist; Teemu Smura                                                                                                                                                                                                                                                                                                                                                                                          |
| see above                                                                                                                                                                                                                                                                                                                                                                                                                                                                                                                                                                                                                                                                                                                                                                                                                                                                                                                                                                                                                                                                                                                                                                                                                                                                                                                                                                                                                                                                                                                                                                                       |                                                                                                                     |                                                                                                   |                                                                                                                                                                                                                                                                                                        |                                                                                                                                                                                                                                                                                                                                                                                                                                                                                                                                                                                                                  |
| EPI_ISL_1599388, EPI_ISL_2333076, EPI_ISL_2509363, EPI_ISL_2725101                                                                                                                                                                                                                                                                                                                                                                                                                                                                                                                                                                                                                                                                                                                                                                                                                                                                                                                                                                                                                                                                                                                                                                                                                                                                                                                                                                                                                                                                                                                              | Nordland Hospital - Bodo, Laboratory Department, Molecular Biology Unit                                             | Norwegian Institute of Public Health, Department of Virology                                      |                                                                                                                                                                                                                                                                                                        | *Kathrine Stene-Johansen; Atiya R Ali; Debech Nadia; Engebretsen Serina Beate; Garcia Llorente Ignacio; Hilde Elshaug; Hilde Vollan; Jon Bråte; Kamilla Heddeland Insteferjord; Karoline Bragstad; Kathrine Stene-Johansen; Line Victoria Moen; Marie Paulsen Madsen; Olav Hungnes; Pedersen Benedikte Nevjen; Rasmus Riis Kopperud                                                                                                                                                                                                                                                                              |
| EPI_ISL_534243                                                                                                                                                                                                                                                                                                                                                                                                                                                                                                                                                                                                                                                                                                                                                                                                                                                                                                                                                                                                                                                                                                                                                                                                                                                                                                                                                                                                                                                                                                                                                                                  | Norra Alvsborgs läns sjukhus                                                                                        | The Public Health Agency of Sweden                                                                |                                                                                                                                                                                                                                                                                                        | Anna Risberg; Anna-Malin Linde; Karin Tegmark-Wisell; Maria Lind Karlberg; Mattias Haukland; Mia Brytting; Olov Svartstrom; Oskar Karlsson Lindsjö; Petra Edquist; Reza Advani; Sandra Brodsson                                                                                                                                                                                                                                                                                                                                                                                                                  |
| EPI_ISL_2931369                                                                                                                                                                                                                                                                                                                                                                                                                                                                                                                                                                                                                                                                                                                                                                                                                                                                                                                                                                                                                                                                                                                                                                                                                                                                                                                                                                                                                                                                                                                                                                                 | North Lantau Hospital                                                                                               | Hong Kong Department of Health                                                                    |                                                                                                                                                                                                                                                                                                        | Alan K.L. Tsang; Edman T.K. Lam; Ken H.L. Ng; Peter C.W. Yip; Rickjason C.W. Chan                                                                                                                                                                                                                                                                                                                                                                                                                                                                                                                                |
| EPI_ISL_456396, EPI_ISL_548060, EPI_ISL_579406, EPI_ISL_579407                                                                                                                                                                                                                                                                                                                                                                                                                                                                                                                                                                                                                                                                                                                                                                                                                                                                                                                                                                                                                                                                                                                                                                                                                                                                                                                                                                                                                                                                                                                                  | North Shore Hospital                                                                                                | Institute of Environmental Science and Research (ESR)                                             |                                                                                                                                                                                                                                                                                                        | Anja Werno; Antje van der Linden; Arlo Upton; Chris Mansell; David Hammer; Dragana Drinkovic; Erasmus Smid; Gary McAuliffe; Hana Sofia Andersson; Hermes Perez; James Ussher; Jill Sherwood; Jing Wang; Joep de Lig; Josh Freeman; Julia Howard; Juliet Elvy; Lauren Jelly; Mary DeAlmeida; Matt Blakiston; Matt Storey; Matthew Rogers; Max Bloomfield; Michael Admit; Michelle Balm; Muhammad Faisal; Nikki Freed; Olin Silander; Sally Roberts; Sarah Jefferies; Sharmini Muttiyah; Susan Morpeth; Susan Taylor; Timothy Blackmore; Vani Sathyendran; Veronica Playle; Virginia Hope; Xiaoyun Ren             |
| EPI_ISL_936968                                                                                                                                                                                                                                                                                                                                                                                                                                                                                                                                                                                                                                                                                                                                                                                                                                                                                                                                                                                                                                                                                                                                                                                                                                                                                                                                                                                                                                                                                                                                                                                  | Northwestern Memorial Hospital                                                                                      | Ozer Lab                                                                                          |                                                                                                                                                                                                                                                                                                        | Chad J. Achenbach; Egon A. Ozer; Judd F. Hultquist; Lucy M. Simons; Lawrence J. Jennings; Michael G. Ison; Ramon Lorenzo-Redondo                                                                                                                                                                                                                                                                                                                                                                                                                                                                                 |
| EPI_ISL_2788600                                                                                                                                                                                                                                                                                                                                                                                                                                                                                                                                                                                                                                                                                                                                                                                                                                                                                                                                                                                                                                                                                                                                                                                                                                                                                                                                                                                                                                                                                                                                                                                 | Norwegian Institute of Public Health, Department of Virology                                                        | Norwegian Institute of Public Health, Department of Virology                                      |                                                                                                                                                                                                                                                                                                        | Atiya R Ali; Debech Nadia; Engebretsen Serina Beate; Garcia Llorente Ignacio; Hilde Elshaug; Hilde Vollan; Jon Bråte; Kamilla Heddeland Insteferjord; Karoline Bragstad; Kathrine Stene-Johansen; Line Victoria Moen; Marie Paulsen Madsen; Olav Hungnes; Pedersen Benedikte Nevjen; Rasmus Riis Kopperud                                                                                                                                                                                                                                                                                                        |
| EPI_ISL_735444, EPI_ISL_735448                                                                                                                                                                                                                                                                                                                                                                                                                                                                                                                                                                                                                                                                                                                                                                                                                                                                                                                                                                                                                                                                                                                                                                                                                                                                                                                                                                                                                                                                                                                                                                  | Nucleic Acid Testing - Rwanda National Reference Laboratory                                                         | GIGA Medical Genomics                                                                             |                                                                                                                                                                                                                                                                                                        | Bouchra Boujemla; Esperence Umumararungu; Jacob Souppgui; Keith Durkin; Léon Mutesa; Maria Artesi; Marie-Pierre Hayette; Patrick Tuyisenge; Robert Rutayisire; Sabin Nsanzimana; Swaibu Gatara; Sébastien Bontems; Vincent Bours; Yvan Butera                                                                                                                                                                                                                                                                                                                                                                    |
| EPI_ISL_925896, EPI_ISL_925907, EPI_ISL_925910, EPI_ISL_930634, EPI_ISL_960228, EPI_ISL_960237, EPI_ISL_960284, EPI_ISL_960300, EPI_ISL_960301, EPI_ISL_960302, EPI_ISL_1301736, EPI_ISL_1301778, EPI_ISL_1302681, EPI_ISL_2362498, EPI_ISL_2362515, EPI_ISL_2362523, EPI_ISL_2362524, EPI_ISL_2362525, EPI_ISL_2362526, EPI_ISL_2365914, EPI_ISL_2521981, EPI_ISL_2521982, EPI_ISL_2521987, EPI_ISL_2521988, EPI_ISL_2521989, EPI_ISL_2521992, EPI_ISL_2521993, EPI_ISL_2521994, EPI_ISL_2521997, EPI_ISL_2522092, EPI_ISL_2522096, EPI_ISL_2811717, EPI_ISL_2811720, EPI_ISL_2811724, EPI_ISL_2828472, EPI_ISL_2828475, EPI_ISL_2828478, EPI_ISL_2828483, EPI_ISL_2828484, EPI_ISL_2828486, EPI_ISL_2828489, EPI_ISL_2828490, EPI_ISL_2828491, EPI_ISL_2828492, EPI_ISL_2828496, EPI_ISL_2828497, EPI_ISL_2828503, EPI_ISL_2828506, EPI_ISL_2828509, EPI_ISL_2828510, EPI_ISL_2828511, EPI_ISL_2828512, EPI_ISL_2828514, EPI_ISL_2828515, EPI_ISL_2863937, EPI_ISL_2863942, EPI_ISL_3012179, EPI_ISL_3012181, EPI_ISL_3012182, EPI_ISL_3012184, EPI_ISL_3012189, EPI_ISL_3012190, EPI_ISL_3012191, EPI_ISL_3012192, EPI_ISL_3012193, EPI_ISL_3012194, EPI_ISL_3012198, EPI_ISL_3012199, EPI_ISL_3012200, EPI_ISL_3012201, EPI_ISL_3012202, EPI_ISL_3012203, EPI_ISL_3012204, EPI_ISL_3012206, EPI_ISL_3012209, EPI_ISL_3012212, EPI_ISL_3012217, EPI_ISL_3012219, EPI_ISL_3012220, EPI_ISL_3012221, EPI_ISL_3012222, EPI_ISL_3012223, EPI_ISL_3012224, EPI_ISL_3012225, EPI_ISL_3012228, EPI_ISL_3012230, EPI_ISL_3012233, EPI_ISL_3012234, EPI_ISL_3021476, EPI_ISL_3021477, EPI_ISL_3021478 |                                                                                                                     |                                                                                                   | Bouchra Boujemla; Corinne Fasluelle; Esperence Umumararungu; Jacob Souppgui; Keith Durkin; Léon Mutesa; Maria Artesi; Marie-Pierre Hayette; Nathalie Renotte; Patrick Tuyisenge; Reuben Sindayiheba; Robert Rutayisire; Sabin Nsanzimana; Swaibu Gatara; Sébastien Bontems; Vincent Bours; Yvan Butera |                                                                                                                                                                                                                                                                                                                                                                                                                                                                                                                                                                                                                  |
| see above                                                                                                                                                                                                                                                                                                                                                                                                                                                                                                                                                                                                                                                                                                                                                                                                                                                                                                                                                                                                                                                                                                                                                                                                                                                                                                                                                                                                                                                                                                                                                                                       |                                                                                                                     |                                                                                                   |                                                                                                                                                                                                                                                                                                        |                                                                                                                                                                                                                                                                                                                                                                                                                                                                                                                                                                                                                  |
| EPI_ISL_2779341, EPI_ISL_2779342                                                                                                                                                                                                                                                                                                                                                                                                                                                                                                                                                                                                                                                                                                                                                                                                                                                                                                                                                                                                                                                                                                                                                                                                                                                                                                                                                                                                                                                                                                                                                                | Nyamira County Referral Hospital                                                                                    | USAMRD-A, Basic Science Laboratory                                                                |                                                                                                                                                                                                                                                                                                        | Alan Lemtudo; Beth Mutai; Brian Andika; Carol Kifude; Clement Masakwe; Eric Muthanje; Esther Omuseni; Faith Sigei; Gathii Kimita; George Awinda; John Waitumbi; Josphat Nyataya; Rachel Githii; Rehema Liyai; Stephen Ochola                                                                                                                                                                                                                                                                                                                                                                                     |
| EPI_ISL_2372331, EPI_ISL_2372338, EPI_ISL_2372377, EPI_ISL_2372402                                                                                                                                                                                                                                                                                                                                                                                                                                                                                                                                                                                                                                                                                                                                                                                                                                                                                                                                                                                                                                                                                                                                                                                                                                                                                                                                                                                                                                                                                                                              | Nyangabwe Hospital HIV Reference Laboratory                                                                         | Botswana Harvard HIV Reference Laboratory                                                         |                                                                                                                                                                                                                                                                                                        | Boitumelo Zuze; Botshelo Radibe; Dorcas Maruapula; Joseph Makhema; Keoratlé Ntshambiwa; Kgomotso Moruisi; Legodile Koepile; Madisa Mine; Mosepele Mosepele; Ontlametse T. Bareng; Pamela Smith-Lawrence; Roger Shapiro; Shahin Lockman; Sikhulile Moyo; Simani Gaseitsiwe; Thongbotho Mphoyakgosi; Wonderful T. Choga                                                                                                                                                                                                                                                                                            |
| EPI_ISL_667345                                                                                                                                                                                                                                                                                                                                                                                                                                                                                                                                                                                                                                                                                                                                                                                                                                                                                                                                                                                                                                                                                                                                                                                                                                                                                                                                                                                                                                                                                                                                                                                  | OHSU Lab Services Molecular Microbiology Lab                                                                        | Oregon SARS-CoV-2 Genome Sequencing Center                                                        |                                                                                                                                                                                                                                                                                                        | Alec J. Hirsch; Andrew C. Adey; Benjamin N. Bimber; Brendan L. O'Connell; Brian J. O'Roak; Daniel N. Streblow; Donna Hansel; Guang Fan; Ruth V. Nichols; Sally Grindstaff; William B. Messer                                                                                                                                                                                                                                                                                                                                                                                                                     |
| EPI_ISL_2545564                                                                                                                                                                                                                                                                                                                                                                                                                                                                                                                                                                                                                                                                                                                                                                                                                                                                                                                                                                                                                                                                                                                                                                                                                                                                                                                                                                                                                                                                                                                                                                                 | OKMI FN Brno                                                                                                        | CETEC MU                                                                                          |                                                                                                                                                                                                                                                                                                        | Bystry Y.; Deissova T.; Dolejska M.; Machackova T.; Pardy F.; Zdrzilova Dubska L.                                                                                                                                                                                                                                                                                                                                                                                                                                                                                                                                |
| EPI_ISL_1366742, EPI_ISL_2372266                                                                                                                                                                                                                                                                                                                                                                                                                                                                                                                                                                                                                                                                                                                                                                                                                                                                                                                                                                                                                                                                                                                                                                                                                                                                                                                                                                                                                                                                                                                                                                | OUCRU                                                                                                               | OUCRU                                                                                             |                                                                                                                                                                                                                                                                                                        | Guy Thwaites; Huynh Trung Trieu; Lam Minh Yen; Le Manh Hung; Le Nguyen Truc Nhu; Le Thi Thu Huong; Le Van Tan; Nghiem My Ngoc; Ngo Ngoc Quang Minh; Nguyen Thanh Dung; Nguyen Thanh Phong; Nguyen Thanh Trung; Nguyen Thi Han Ny; Nguyen Thi Thu Hong; Nguyen Thi Thu Hong; Nguyen To Anh; Nguyen Tri Dung; Nguyen Van Vinh Chau; Tran Nguyen Hoang Tu; Tran Tan Thang                                                                                                                                                                                                                                           |
| EPI_ISL_2406461, EPI_ISL_2501032                                                                                                                                                                                                                                                                                                                                                                                                                                                                                                                                                                                                                                                                                                                                                                                                                                                                                                                                                                                                                                                                                                                                                                                                                                                                                                                                                                                                                                                                                                                                                                | Oddar Meanchey Rapid Response Team                                                                                  | Virology Unit, Institut Pasteur du Cambodge                                                       |                                                                                                                                                                                                                                                                                                        | Cecile Troupin; Chau Darapeak; Chin Savuth; Erik A Karlsson; Jurre Y Siegers; Kraing Sidonn; Leakhena Pum; Ly Sovann; Veasna Doung; Yi Sengdeourn                                                                                                                                                                                                                                                                                                                                                                                                                                                                |
| EPI_ISL_1138869                                                                                                                                                                                                                                                                                                                                                                                                                                                                                                                                                                                                                                                                                                                                                                                                                                                                                                                                                                                                                                                                                                                                                                                                                                                                                                                                                                                                                                                                                                                                                                                 | Office of Diseases Prevention and Control Region 4 Saraburi                                                         | COVID-19 Network Investigations (CONI) Alliance                                                   |                                                                                                                                                                                                                                                                                                        | Angkana Huang; Anthony R. Jones; Arporn Wangwiwatsin; Bhakhboom Panthan; Chonticha Klungton; Duangkamon Loebanluetchai; Ekawat Pasomsub; Elizabeth Batty; Insee Sensoron; Janjira Thaipadungpanit; Jutikul Kaewmalakul; Khajohn Joonlasak; Kinkan Rakmanee; Krittikorn Kumpornsri; Namfon Kotanan; Nathamon Noonchook; Pakjira Rimdusit; Payon Pengyo; Praina Moonmuang; Sataporn Hatsadchirat; Sirinapa Singshong; Sirivan Lakesukthom; Sirivan Yaemnimnual; Stefan Fernandez; Suttiruk Chanchawai; Thanat Chachakorn; Treewat Wattanachockhach; Wasun Chantarat; Winvimol Lemprasert; Wudtichai Manasatienjiri |
| EPI_ISL_2588639                                                                                                                                                                                                                                                                                                                                                                                                                                                                                                                                                                                                                                                                                                                                                                                                                                                                                                                                                                                                                                                                                                                                                                                                                                                                                                                                                                                                                                                                                                                                                                                 | Ohio Department of Health Laboratory                                                                                | Ohio Department of Health Laboratory                                                              |                                                                                                                                                                                                                                                                                                        | Allison Black; Brent Lee; Caitlin McDonnell; Eric Brandt; Erica Leasure; Glen McGillivray; Heather Blankenship; Holmes; Jade Mowery; Jennifer; Kelsey Florek; Keoni Omura; Kirtana Ramadugu; Quanta Brown; Stephanie Mccracken; Tyler Payne; and Tammy Bannerman                                                                                                                                                                                                                                                                                                                                                 |
| EPI_ISL_2547342, EPI_ISL_2547351, EPI_ISL_2547353                                                                                                                                                                                                                                                                                                                                                                                                                                                                                                                                                                                                                                                                                                                                                                                                                                                                                                                                                                                                                                                                                                                                                                                                                                                                                                                                                                                                                                                                                                                                               | Okiep CHC                                                                                                           | National Health Laboratory Service/University of Cape Town (NHLS/UUCT)                            |                                                                                                                                                                                                                                                                                                        | Arash Iranzadeh; Bruna Galvaeo; Carolyn Williamson; Deelan Doolabh; Diana Hardie; Gert Marais; Innocent Mudau; Lynn Tyers; Marvin Hsiao; Stephen Korsman                                                                                                                                                                                                                                                                                                                                                                                                                                                         |
| EPI_ISL_492016                                                                                                                                                                                                                                                                                                                                                                                                                                                                                                                                                                                                                                                                                                                                                                                                                                                                                                                                                                                                                                                                                                                                                                                                                                                                                                                                                                                                                                                                                                                                                                                  | Oman-NIC                                                                                                            | Department of Microbiology and Immunology-SQUH                                                    |                                                                                                                                                                                                                                                                                                        | Abdulla Balkhair; Ahlam Al-Amri; Aisha Al-Amri; Aisha Al-Busaidi; Amina Al Jardani; Fahad Zadjali; Fatma BaAlawi; Hamida Al Barwani; Hanan Al-Kindi; Intisar Al-Shukri; Khulood Al-Mammary; Mohammed Al-Tobi; Samiha Al Kharusi; Samira Al-Maruqi; Zeyana AL-Dahmani                                                                                                                                                                                                                                                                                                                                             |
| EPI_ISL_457701, EPI_ISL_457706                                                                                                                                                                                                                                                                                                                                                                                                                                                                                                                                                                                                                                                                                                                                                                                                                                                                                                                                                                                                                                                                                                                                                                                                                                                                                                                                                                                                                                                                                                                                                                  | Oman-NIC                                                                                                            | Oman-NIC                                                                                          |                                                                                                                                                                                                                                                                                                        | Abdulla Balkhair; Ahlam Al-Amri; Aisha Al-Amri; Aisha Al-Busaidi; Amina Al Jardani; Fahad Zadjali; Fatma BaAlawi; Hamida Al Barwani; Hanan Al-Kindi; Intisar Al-Shukri; Khulood Al-Mammary; Mohammed Al-Tobi; Samiha Al Kharusi; Samira Al-Maruqi; Zeyana AL-Dahmani                                                                                                                                                                                                                                                                                                                                             |
| EPI_ISL_2921171, EPI_ISL_2921174, EPI_ISL_2921181, EPI_ISL_2921182, EPI_ISL_2921186, EPI_ISL_2921187, EPI_ISL_2921188, EPI_ISL_2921189, EPI_ISL_2921200, EPI_ISL_2921201, EPI_ISL_2925607, EPI_ISL_2925610, EPI_ISL_2925612, EPI_ISL_2925623                                                                                                                                                                                                                                                                                                                                                                                                                                                                                                                                                                                                                                                                                                                                                                                                                                                                                                                                                                                                                                                                                                                                                                                                                                                                                                                                                    | see above                                                                                                           | Oman-National Influenza Center                                                                    |                                                                                                                                                                                                                                                                                                        | Aisha Al-Busaidi; Amina Al Jardani; Bilal Hussain; Fahad Al Balushi; Hanan Al Kindi; Intisar Al-Shukri; Intisar Al-Shukri.; Laila Al Balushi; Samiha Al Kharusi                                                                                                                                                                                                                                                                                                                                                                                                                                                  |
| EPI_ISL_1795050                                                                                                                                                                                                                                                                                                                                                                                                                                                                                                                                                                                                                                                                                                                                                                                                                                                                                                                                                                                                                                                                                                                                                                                                                                                                                                                                                                                                                                                                                                                                                                                 | Oman-NIC                                                                                                            | Oman-National Influenza Center-Department of Microbiology and Immunology-SQUH                     |                                                                                                                                                                                                                                                                                                        | Abdulla Balkhair; Ahlam Al-Amri; Aisha Al-Amri; Aisha Al-Busaidi; Amina Al Jardani; Fahad Zadjali; Fatma BaAlawi; Hamida Al Barwani; Hanan Al-Kindi; Intisar Al-Shukri; Khulood Al-Mammary; Mohammed Al-Tobi; Samiha Al Kharusi; Samira Al-Maruqi; Zeyana AL-Dahmani                                                                                                                                                                                                                                                                                                                                             |
| EPI_ISL_1819076                                                                                                                                                                                                                                                                                                                                                                                                                                                                                                                                                                                                                                                                                                                                                                                                                                                                                                                                                                                                                                                                                                                                                                                                                                                                                                                                                                                                                                                                                                                                                                                 | Oman-NIC                                                                                                            | Oman-National Influenza Center-Department of Microbiology and Immunology-SQUH                     |                                                                                                                                                                                                                                                                                                        | Abdulla Balkhair; Ahlam Al-Amri; Aisha Al-Amri; Aisha Al-Busaidi; Amina Al Jardani; Fahad Zadjali; Fatma BaAlawi; Hamida Al Barwani; Hanan Al-Kindi; Intisar Al-Shukri; Khulood Al-Mammary; Mohammed Al-Tobi; Samiha Al Kharusi; Samira Al-Maruqi; Zeyana AL-Dahmani                                                                                                                                                                                                                                                                                                                                             |
| EPI_ISL_525429, EPI_ISL_1532282, EPI_ISL_2692996                                                                                                                                                                                                                                                                                                                                                                                                                                                                                                                                                                                                                                                                                                                                                                                                                                                                                                                                                                                                                                                                                                                                                                                                                                                                                                                                                                                                                                                                                                                                                | Oman-National Influenza Center                                                                                      | Biotechnology & OMICs Laboratory                                                                  |                                                                                                                                                                                                                                                                                                        | ; Abdul Latif Khan; Adil Al-Wahaibi; Adil Khan; Ahmed Al Harrasi; Ahmed Al-Harrasi; Ahmed Al-Rawahi; Ahmed N Al-Rawahi; Aisha Al-Amri; Amal Al-Maani; Amina Al-Jardani; Amina Al-Jardani.; Bilal Hussain; Hanan Al-Kindi; Intisar Al-Shukri; Sajjad Asaf; Samiha Al-Kharusi; Samira Al-Mahrui; Samiya Al-Zadjali; Saqib Bilal; Seif Al-Abri                                                                                                                                                                                                                                                                      |
| EPI_ISL_518845, EPI_ISL_518848                                                                                                                                                                                                                                                                                                                                                                                                                                                                                                                                                                                                                                                                                                                                                                                                                                                                                                                                                                                                                                                                                                                                                                                                                                                                                                                                                                                                                                                                                                                                                                  | Oman-National Influenza Center                                                                                      | Biotechnology & OMICs Laboratory, Natural & Medical Sciences Research Center, University of Nizwa |                                                                                                                                                                                                                                                                                                        | Abdul Latif Khan; Adil Al-Wahaibi; Adil Khan; Ahlam Al-Amri; Ahmed Al-Harrasi; Ahmed Al-Rawahi; Aisha Al-Amri; Aisha Al-Busaidi; Amina Al-Jardani; Hanan Al-Kindi; Intisar Al-Shukri; Sajjad Asaf; Samiha Al-Kharusi; Samira Al-Mahrui; Seif Al-Abri; Seif Al-Abri.                                                                                                                                                                                                                                                                                                                                              |
| EPI_ISL_2820625                                                                                                                                                                                                                                                                                                                                                                                                                                                                                                                                                                                                                                                                                                                                                                                                                                                                                                                                                                                                                                                                                                                                                                                                                                                                                                                                                                                                                                                                                                                                                                                 | Omega Diagnostics at Mounes                                                                                         | Omega Diagnostics at Mounes                                                                       |                                                                                                                                                                                                                                                                                                        | Cynthia Corley; Latira Haynes-Jacob; Maria Echeverria; Vivek Khare MD                                                                                                                                                                                                                                                                                                                                                                                                                                                                                                                                            |
| EPI_ISL_2405157                                                                                                                                                                                                                                                                                                                                                                                                                                                                                                                                                                                                                                                                                                                                                                                                                                                                                                                                                                                                                                                                                                                                                                                                                                                                                                                                                                                                                                                                                                                                                                                 | Omics Sciences Laboratory                                                                                           | Omics Sciences Laboratory                                                                         |                                                                                                                                                                                                                                                                                                        | Darlyn Amaya; Derly Andrade Molina; Gabriel Morey León; Juan Carlos Fernández Cadena; Rubén Armas González                                                                                                                                                                                                                                                                                                                                                                                                                                                                                                       |
| EPI_ISL_569843                                                                                                                                                                                                                                                                                                                                                                                                                                                                                                                                                                                                                                                                                                                                                                                                                                                                                                                                                                                                                                                                                                                                                                                                                                                                                                                                                                                                                                                                                                                                                                                  | Omsk Research Institute of Natural Focal Infections                                                                 | WHO National Influenza Centre Russian Federation                                                  |                                                                                                                                                                                                                                                                                                        | Aleksei Vasilenko; Andrey Komissarov; Artem Fadeev; Daria Nashatyreva; Ekaterina Gradoboeva; Ekaterina Savkina; Elena Poleshchuk; Valery Yakimenko                                                                                                                                                                                                                                                                                                                                                                                                                                                               |
| EPI_ISL_1739670, EPI_ISL_1739728, EPI_ISL_1739844, EPI_ISL_1739932, EPI_ISL_1739979, EPI_ISL_1740014, EPI_ISL_1740066, EPI_ISL_1740069, EPI_ISL_1740095, EPI_ISL_1740341, EPI_ISL_1740343, EPI_ISL_1740344, EPI_ISL_1740345, EPI_ISL_1740387, EPI_ISL_1740392, EPI_ISL_1740428, EPI_ISL_1740446                                                                                                                                                                                                                                                                                                                                                                                                                                                                                                                                                                                                                                                                                                                                                                                                                                                                                                                                                                                                                                                                                                                                                                                                                                                                                                 | see above                                                                                                           | McMaster University                                                                               |                                                                                                                                                                                                                                                                                                        | Ahmed Draia; Allison McGeer; Andrew G. McArthur; Angel Li; Emily Panousis; Hooman Derakhshani; Jalees Nasir; Kuganya Nirmalarajah; Michael Surette; Patryk Aftanas; Samira Mubareka                                                                                                                                                                                                                                                                                                                                                                                                                              |
| EPI_ISL_1546496, EPI_ISL_1546997, EPI_ISL_1979289                                                                                                                                                                                                                                                                                                                                                                                                                                                                                                                                                                                                                                                                                                                                                                                                                                                                                                                                                                                                                                                                                                                                                                                                                                                                                                                                                                                                                                                                                                                                               | Originating lab: Wales Specialist Virology Centre Sequencing lab; Pathogen Genomics Unit                            | Public Health Wales Microbiology Cardiff Wales Specialist Virology Centre                         |                                                                                                                                                                                                                                                                                                        | Alec Birchley; Alexander Adams; Amy Gaskin; Angela Marchbank; Bree Gatica-Wilcox; Catherine Moore; Jason Coombes; Joanne Watkins; Joel Southgate; Johnathan Evans; Laura Gifford; Lauren Gilbert; Lee Graham; Malorie Perry; Matthew Bull; Nicole Pacciairini; Sally Cordon; Sara Kumziene-Summerhayes; Sara Rey; Sarah Taylor; Simon Cottrell; Sophie Jones; Tom Connor                                                                                                                                                                                                                                         |
| EPI_ISL_417484, EPI_ISL_2491426                                                                                                                                                                                                                                                                                                                                                                                                                                                                                                                                                                                                                                                                                                                                                                                                                                                                                                                                                                                                                                                                                                                                                                                                                                                                                                                                                                                                                                                                                                                                                                 | Oslo University Hospital, Department of Medical Microbiology                                                        | Norwegian Institute of Public Health, Department of Virology                                      |                                                                                                                                                                                                                                                                                                        | Atiya R Ali; Debech Nadia; Engebretsen Serina Beate; Garcia Llorente Ignacio; Hilde Elshaug; Hilde Vollan; Jon Bråte; Kamilla Heddeland Insteferjord; Karoline Bragstad; Kathrine Stene-Johansen; Line Victoria Moen; Marie Paulsen Madsen; Olav Hungnes; Pedersen Benedikte Nevjen; Rasmus Riis Kopperud                                                                                                                                                                                                                                                                                                        |
| EPI_ISL_1820369, EPI_ISL_1820375, EPI_ISL_2225889, EPI_ISL_2426075, EPI_ISL_2491425, EPI_ISL_2925773                                                                                                                                                                                                                                                                                                                                                                                                                                                                                                                                                                                                                                                                                                                                                                                                                                                                                                                                                                                                                                                                                                                                                                                                                                                                                                                                                                                                                                                                                            | Ostfold Hospital Trust - Kalnes, Centre for Laboratory Medicine, Section for gene technology and infection serology | Norwegian Institute of Public Health, Department of Virology                                      |                                                                                                                                                                                                                                                                                                        | Atiya R Ali; Debech Nadia; Engebretsen Serina Beate; Garcia Llorente Ignacio; Hilde Elshaug; Hilde Vollan; Jon Bråte; Kamilla Heddeland Insteferjord; Karoline Bragstad; Kathrine Stene-Johansen; Line Victoria Moen; Marie Paulsen Madsen; Olav Hungnes; Pedersen Benedikte Nevjen; Rasmus Riis Kopperud                                                                                                                                                                                                                                                                                                        |
| EPI_ISL_3031381, EPI_ISL_3031391, EPI_ISL_3031396, EPI_ISL_3031399                                                                                                                                                                                                                                                                                                                                                                                                                                                                                                                                                                                                                                                                                                                                                                                                                                                                                                                                                                                                                                                                                                                                                                                                                                                                                                                                                                                                                                                                                                                              | Othaya Sub-County Hospital                                                                                          | USAMRD-A, Basic Science Laboratory                                                                |                                                                                                                                                                                                                                                                                                        | Alan Lemtudo; Beth Mutai; Brian Andika; Carol Kifude; Clement Masakwe; Eric Muthanje; Esther Omuseni; Faith Sigei; Gathii Kimita; George Awinda; John Waitumbi; Josphat Nyataya; Rachel Githii; Rehema Liyai; Stephen Ochola                                                                                                                                                                                                                                                                                                                                                                                     |
| EPI_ISL_1534378                                                                                                                                                                                                                                                                                                                                                                                                                                                                                                                                                                                                                                                                                                                                                                                                                                                                                                                                                                                                                                                                                                                                                                                                                                                                                                                                                                                                                                                                                                                                                                                 | Oudtshoorn Hospital wc OUD                                                                                          | NHLS/UUCT                                                                                         |                                                                                                                                                                                                                                                                                                        | Arash Iranzadeh; Bruna Galvaeo; Carolyn Williamson; Deelan Doolabh; Diana Hardie; Emmanuel SJ; Innocent Mudau; Kruger Marais; Lynn Tyers; Marvin Hsiao; Stephen Korsman; Tegally H; de Oliveira T                                                                                                                                                                                                                                                                                                                                                                                                                |
| EPI_ISL_1273214                                                                                                                                                                                                                                                                                                                                                                                                                                                                                                                                                                                                                                                                                                                                                                                                                                                                                                                                                                                                                                                                                                                                                                                                                                                                                                                                                                                                                                                                                                                                                                                 | Oxford University Clinical Research Unit (OUCRU)                                                                    | Oxford University Clinical Research Unit (OUCRU)                                                  |                                                                                                                                                                                                                                                                                                        | Guy Thwaites; Huynh Trung Trieu; Lam Minh Yen; Le Manh Hung; Le Nguyen Truc Nhu; Le Van Tan; Nghiem My Ngoc; Ngo Ngoc Quang Minh; Nguyen Thanh Dung; Nguyen Thanh Phong; Nguyen Thanh Trung; Nguyen Thi Thu Hong; Nguyen To Anh; Nguyen Tri Dung                                                                                                                                                                                                                                                                                                                                                                 |
| EPI_ISL_3078887                                                                                                                                                                                                                                                                                                                                                                                                                                                                                                                                                                                                                                                                                                                                                                                                                                                                                                                                                                                                                                                                                                                                                                                                                                                                                                                                                                                                                                                                                                                                                                                 | Oxford Viroemics, NDM, University of Oxford; Oxford University Hospitals; Basingstoke and North Hampshire Hospital  | COVID-19 Genomics UK (COG-UK) Consortium                                                          |                                                                                                                                                                                                                                                                                                        | Alex Mobbs; Amy Trebes; Anita Justice; Catrin Moore; Christophe Fraser; David Bonsall; David Buck; Emma Wise; George Macintyre; Jessica Lynch; John Todd; Mariateresa de Cesare; Matilde Mori; Monique Anderson; Nathan Moore; Nick Cortes; Robert Shaw; Stephen Kidd; Tanya Golubchik; Timothy Peto                                                                                                                                                                                                                                                                                                             |
| EPI_ISL_2086976                                                                                                                                                                                                                                                                                                                                                                                                                                                                                                                                                                                                                                                                                                                                                                                                                                                                                                                                                                                                                                                                                                                                                                                                                                                                                                                                                                                                                                                                                                                                                                                 | PATH CARE                                                                                                           | National Institute for Communicable Diseases of the National                                      |                                                                                                                                                                                                                                                                                                        | Amoako DG; Bhiman JN; Ismail A; Mahlangu B; Mohale T; Ntuli N; Scheepers C                                                                                                                                                                                                                                                                                                                                                                                                                                                                                                                                       |





|                                                                                                                                                                                                                                                                                                                                                                                                                                                                                                                                                                                                                                                                                                                                                                                                                                                                                                                                                                                                                                                                                                                                                                                                                                                                                                                                                                                |                                                                                                                                                                                                                                                                                                                                                                                                                                          |                                                                                                                                 |                                                                                                                                                                                                                                                                                                                                                                                                                                                                                                                                                                                                                                                                                                                                                                                                                                                                                                                                          |
|--------------------------------------------------------------------------------------------------------------------------------------------------------------------------------------------------------------------------------------------------------------------------------------------------------------------------------------------------------------------------------------------------------------------------------------------------------------------------------------------------------------------------------------------------------------------------------------------------------------------------------------------------------------------------------------------------------------------------------------------------------------------------------------------------------------------------------------------------------------------------------------------------------------------------------------------------------------------------------------------------------------------------------------------------------------------------------------------------------------------------------------------------------------------------------------------------------------------------------------------------------------------------------------------------------------------------------------------------------------------------------|------------------------------------------------------------------------------------------------------------------------------------------------------------------------------------------------------------------------------------------------------------------------------------------------------------------------------------------------------------------------------------------------------------------------------------------|---------------------------------------------------------------------------------------------------------------------------------|------------------------------------------------------------------------------------------------------------------------------------------------------------------------------------------------------------------------------------------------------------------------------------------------------------------------------------------------------------------------------------------------------------------------------------------------------------------------------------------------------------------------------------------------------------------------------------------------------------------------------------------------------------------------------------------------------------------------------------------------------------------------------------------------------------------------------------------------------------------------------------------------------------------------------------------|
| see above                                                                                                                                                                                                                                                                                                                                                                                                                                                                                                                                                                                                                                                                                                                                                                                                                                                                                                                                                                                                                                                                                                                                                                                                                                                                                                                                                                      | Port Health Clinic, Busia border point                                                                                                                                                                                                                                                                                                                                                                                                   | USAMRD-A, Basic Science Laboratory                                                                                              | Alan Lemtudo; Beth Mutai; Brian Andika; Carol Kifude; Clement Masakwe; Eric Muthanje; Esther Omuseni; Faith Sigei; Gathii Kimita; George Awinda; John Waitumbi; Josphat Nyataya; Rachel Githii; Rehema Liyai; Stephen Ochola                                                                                                                                                                                                                                                                                                                                                                                                                                                                                                                                                                                                                                                                                                             |
| EPI_ISL_2779496, EPI_ISL_2779500, EPI_ISL_2779507                                                                                                                                                                                                                                                                                                                                                                                                                                                                                                                                                                                                                                                                                                                                                                                                                                                                                                                                                                                                                                                                                                                                                                                                                                                                                                                              | Port Health Clinic, Malaba border point                                                                                                                                                                                                                                                                                                                                                                                                  | USAMRD-A, Basic Science Laboratory                                                                                              | Alan Lemtudo; Beth Mutai; Brian Andika; Carol Kifude; Clement Masakwe; Eric Muthanje; Esther Omuseni; Faith Sigei; Gathii Kimita; George Awinda; John Waitumbi; Josphat Nyataya; Rachel Githii; Rehema Liyai; Stephen Ochola                                                                                                                                                                                                                                                                                                                                                                                                                                                                                                                                                                                                                                                                                                             |
| EPI_ISL_529013                                                                                                                                                                                                                                                                                                                                                                                                                                                                                                                                                                                                                                                                                                                                                                                                                                                                                                                                                                                                                                                                                                                                                                                                                                                                                                                                                                 | Presidio Ospedaliero "S.Filippo e Nicola"-Avezzano                                                                                                                                                                                                                                                                                                                                                                                       | Istituto Zooprofilattico Sperimentale dell'Abruzzo e Molise "G.Caporale"                                                        | Ancora M; Cammà C; Curini V; Di Domenico M; Di Pasquale A; Lorusso A; Mangone I; Marcacci M; Puglia I; Rinaldi A; Savini G.                                                                                                                                                                                                                                                                                                                                                                                                                                                                                                                                                                                                                                                                                                                                                                                                              |
| EPI_ISL_1819200                                                                                                                                                                                                                                                                                                                                                                                                                                                                                                                                                                                                                                                                                                                                                                                                                                                                                                                                                                                                                                                                                                                                                                                                                                                                                                                                                                | Presidio di Brindisi Di Summa - Perrino                                                                                                                                                                                                                                                                                                                                                                                                  | Istituto Zooprofilattico Sperimentale della Puglia e della Basilicata                                                           | Bianco A.; Capozzi L.; Del Sambro L.; Difato L.; Giannico A.; Parisi A.; Ridolfi D.; Santoro A.; Simone D.                                                                                                                                                                                                                                                                                                                                                                                                                                                                                                                                                                                                                                                                                                                                                                                                                               |
| EPI_ISL_2790410                                                                                                                                                                                                                                                                                                                                                                                                                                                                                                                                                                                                                                                                                                                                                                                                                                                                                                                                                                                                                                                                                                                                                                                                                                                                                                                                                                | Primary Health Care Celinac                                                                                                                                                                                                                                                                                                                                                                                                              | Public Health Institute of Republic of Srpska                                                                                   | Branka Culibrk; Dijana Vukajlović; Milica Celic; Pava Dimitrijević; Stanka Tomić; Tatjana Marković; Zeljka Sumić                                                                                                                                                                                                                                                                                                                                                                                                                                                                                                                                                                                                                                                                                                                                                                                                                         |
| EPI_ISL_2790402, EPI_ISL_2790404, EPI_ISL_2790406                                                                                                                                                                                                                                                                                                                                                                                                                                                                                                                                                                                                                                                                                                                                                                                                                                                                                                                                                                                                                                                                                                                                                                                                                                                                                                                              | Primary Health Care Laktasi                                                                                                                                                                                                                                                                                                                                                                                                              | Public Health Institute of Republic of Srpska                                                                                   | Branka Culibrk; Dijana Vukajlović; Milica Celic; Pava Dimitrijević; Stanka Tomić; Tatjana Marković; Zeljka Sumić                                                                                                                                                                                                                                                                                                                                                                                                                                                                                                                                                                                                                                                                                                                                                                                                                         |
| EPI_ISL_2790405                                                                                                                                                                                                                                                                                                                                                                                                                                                                                                                                                                                                                                                                                                                                                                                                                                                                                                                                                                                                                                                                                                                                                                                                                                                                                                                                                                | Primary Health Care Prijedor                                                                                                                                                                                                                                                                                                                                                                                                             | Public Health Institute of Republic of Srpska                                                                                   | Branka Culibrk; Dijana Vukajlović; Milica Celic; Pava Dimitrijević; Stanka Tomić; Tatjana Marković; Zeljka Sumić                                                                                                                                                                                                                                                                                                                                                                                                                                                                                                                                                                                                                                                                                                                                                                                                                         |
| EPI_ISL_417064                                                                                                                                                                                                                                                                                                                                                                                                                                                                                                                                                                                                                                                                                                                                                                                                                                                                                                                                                                                                                                                                                                                                                                                                                                                                                                                                                                 | Prince of Wales Hospital                                                                                                                                                                                                                                                                                                                                                                                                                 | Hong Kong Department of Health                                                                                                  | Alan K.L. Tsang; Dominic N.C. Tsang; Edman T.K. Lam; Peter C.W. Yip; Rickjason C.W. Chan                                                                                                                                                                                                                                                                                                                                                                                                                                                                                                                                                                                                                                                                                                                                                                                                                                                 |
| EPI_ISL_1402425, EPI_ISL_1402426                                                                                                                                                                                                                                                                                                                                                                                                                                                                                                                                                                                                                                                                                                                                                                                                                                                                                                                                                                                                                                                                                                                                                                                                                                                                                                                                               | Private clinic of Biogen Med, Tashkent, Uzbekistan                                                                                                                                                                                                                                                                                                                                                                                       | Center of Genomics and Bioinformatics, Bioinformatics laboratory                                                                | Abdurakhmon N Yusupov; Ibrokhim Y Abdurakhmonov.; Mirzakamol S Ayubov; Mukhammadjon H Mirzakhmedov; Shukhrat E Shermatov; Zabardast T Buriyev                                                                                                                                                                                                                                                                                                                                                                                                                                                                                                                                                                                                                                                                                                                                                                                            |
| EPI_ISL_1092071                                                                                                                                                                                                                                                                                                                                                                                                                                                                                                                                                                                                                                                                                                                                                                                                                                                                                                                                                                                                                                                                                                                                                                                                                                                                                                                                                                | Protzer Lab                                                                                                                                                                                                                                                                                                                                                                                                                              | Protzer Lab, Laboratory for Functional Genome Analysis, Dept. Genomics, Gene Center of the LMU Munich                           | Alexander Graf; Dieter Hoffmann; Elisabeth Esser; Eva C.Schulte; Helmut Blum; Stefan Krebs; Till Bunse; Ulrike Protzer                                                                                                                                                                                                                                                                                                                                                                                                                                                                                                                                                                                                                                                                                                                                                                                                                   |
| EPI_ISL_1909922                                                                                                                                                                                                                                                                                                                                                                                                                                                                                                                                                                                                                                                                                                                                                                                                                                                                                                                                                                                                                                                                                                                                                                                                                                                                                                                                                                | Provincial Public Health Reference Laboratory                                                                                                                                                                                                                                                                                                                                                                                            | Provincial Public Health Reference Laboratory                                                                                   | ANDLEEB HANIF; Asim Altaf; Hassan Nawaz; Mariam Javed                                                                                                                                                                                                                                                                                                                                                                                                                                                                                                                                                                                                                                                                                                                                                                                                                                                                                    |
| EPI_ISL_2543563, EPI_ISL_2543615, EPI_ISL_2544508                                                                                                                                                                                                                                                                                                                                                                                                                                                                                                                                                                                                                                                                                                                                                                                                                                                                                                                                                                                                                                                                                                                                                                                                                                                                                                                              | Provincial Public Health Reference Laboratory (PPHRL) P&SHD                                                                                                                                                                                                                                                                                                                                                                              | Provincial Public Health Reference Laboratory (PPHRL) P&SHD                                                                     | ANDLEEB HANIF                                                                                                                                                                                                                                                                                                                                                                                                                                                                                                                                                                                                                                                                                                                                                                                                                                                                                                                            |
| EPI_ISL_1180679                                                                                                                                                                                                                                                                                                                                                                                                                                                                                                                                                                                                                                                                                                                                                                                                                                                                                                                                                                                                                                                                                                                                                                                                                                                                                                                                                                | Public Health Authority of the Slovak Republic                                                                                                                                                                                                                                                                                                                                                                                           | Berghthaler laboratory, CeMM Research Center for Molecular Medicine of the Austrian Academy of Sciences                         | Andreas Berghthaler; Anna Schedl; Bekir Erguner; Benedikt Agerer; Christoph Bock; Fabian Amman; Jan Laine; Lukas Endler; Maelle Le Moing; Martin Senekowitsch; Michael Schuster; Thomas Penz                                                                                                                                                                                                                                                                                                                                                                                                                                                                                                                                                                                                                                                                                                                                             |
| EPI_ISL_1647661, EPI_ISL_1647749, EPI_ISL_1749617, EPI_ISL_1749618, EPI_ISL_2448839, EPI_ISL_2598620, EPI_ISL_2657889, EPI_ISL_2657919, EPI_ISL_2657920, EPI_ISL_2688039                                                                                                                                                                                                                                                                                                                                                                                                                                                                                                                                                                                                                                                                                                                                                                                                                                                                                                                                                                                                                                                                                                                                                                                                       | Public Health Authority of the Slovak Republic                                                                                                                                                                                                                                                                                                                                                                                           | Laboratory of Genomics and Bioinformatics, Comenius University Science Park                                                     | Anna Gičová; Diana Rusňáková; Jakub Styk; Jaroslav Budiš; Miroslav Böhmer; Tatiana Sedláčková; Tomáš Szemes                                                                                                                                                                                                                                                                                                                                                                                                                                                                                                                                                                                                                                                                                                                                                                                                                              |
| see above                                                                                                                                                                                                                                                                                                                                                                                                                                                                                                                                                                                                                                                                                                                                                                                                                                                                                                                                                                                                                                                                                                                                                                                                                                                                                                                                                                      | Public Health Authority of the Slovak Republic                                                                                                                                                                                                                                                                                                                                                                                           | Laboratory of Genomics and Bioinformatics, Comenius University Science Park                                                     | Anna Gičová; Barbora Kotvasová; Elena Tichá; Lucia Ševčíková; Miroslav Böhmer; Pavol Mišenko; Terézia Vrabřová; Tomáš Szemes                                                                                                                                                                                                                                                                                                                                                                                                                                                                                                                                                                                                                                                                                                                                                                                                             |
| EPI_ISL_2379751                                                                                                                                                                                                                                                                                                                                                                                                                                                                                                                                                                                                                                                                                                                                                                                                                                                                                                                                                                                                                                                                                                                                                                                                                                                                                                                                                                | Public Health Authority of the Slovak Republic                                                                                                                                                                                                                                                                                                                                                                                           | Public Health Authority of the Slovak Republic                                                                                  | Anna Gičová; Barbora Kotvasová; Elena Tichá; Lucia Ševčíková; Miroslav Böhmer; Pavol Mišenko; Terézia Vrabřová; Tomáš Szemes                                                                                                                                                                                                                                                                                                                                                                                                                                                                                                                                                                                                                                                                                                                                                                                                             |
| EPI_ISL_2351129                                                                                                                                                                                                                                                                                                                                                                                                                                                                                                                                                                                                                                                                                                                                                                                                                                                                                                                                                                                                                                                                                                                                                                                                                                                                                                                                                                | Public Health Center 52 Samsennok                                                                                                                                                                                                                                                                                                                                                                                                        | Division of Genomic Medicine and Innovation support, Department of Medical Sciences, Ministry of Public Health, Thailand        | Archawin Rojanawitwat; Jirapha Pakdee; Natthakul Bunneang; Nuanjun Wichukhinda; Penpittha Thawong; Plailuk Akkapaiboon Okada; Puntharika Piboosiri; Surakameth Mahasirimongkol; Waritta Sawaengdee                                                                                                                                                                                                                                                                                                                                                                                                                                                                                                                                                                                                                                                                                                                                       |
| EPI_ISL_1112327, EPI_ISL_1112329, EPI_ISL_1112753                                                                                                                                                                                                                                                                                                                                                                                                                                                                                                                                                                                                                                                                                                                                                                                                                                                                                                                                                                                                                                                                                                                                                                                                                                                                                                                              | Public Health Center of Ukraine                                                                                                                                                                                                                                                                                                                                                                                                          | Charité Universitätsmedizin Berlin, Institute of Virology                                                                       | Barbara Mühlemann; Christian Drosten; Ihor Kuzin; Iryna Demchyshyna; Julia Schneider; Jörn Beheim-Schwarzbach; Liudmyla Chernenko; Roman Rodyna; Talitha Veith; Terry Jones; Victor M Corman                                                                                                                                                                                                                                                                                                                                                                                                                                                                                                                                                                                                                                                                                                                                             |
| EPI_ISL_636973                                                                                                                                                                                                                                                                                                                                                                                                                                                                                                                                                                                                                                                                                                                                                                                                                                                                                                                                                                                                                                                                                                                                                                                                                                                                                                                                                                 | Public Health Lab                                                                                                                                                                                                                                                                                                                                                                                                                        | Public Health Lab                                                                                                               | Alwasti; H                                                                                                                                                                                                                                                                                                                                                                                                                                                                                                                                                                                                                                                                                                                                                                                                                                                                                                                               |
| EPI_ISL_775080, EPI_ISL_775157, EPI_ISL_854650, EPI_ISL_854721, EPI_ISL_875752, EPI_ISL_875764, EPI_ISL_875765, EPI_ISL_875768, EPI_ISL_875771, EPI_ISL_875848, EPI_ISL_875863, EPI_ISL_875864, EPI_ISL_925718, EPI_ISL_925769, EPI_ISL_925781, EPI_ISL_1112618, EPI_ISL_1112619, EPI_ISL_1112631, EPI_ISL_1112803, EPI_ISL_1112820, EPI_ISL_1112836, EPI_ISL_1170498, EPI_ISL_1170552, EPI_ISL_1170615, EPI_ISL_1170627, EPI_ISL_1170659, EPI_ISL_1170706, EPI_ISL_1170769, EPI_ISL_1170787, EPI_ISL_1183470, EPI_ISL_1183583, EPI_ISL_1230684, EPI_ISL_1230736, EPI_ISL_1230755, EPI_ISL_1230800, EPI_ISL_1270899, EPI_ISL_1271039, EPI_ISL_1271347, EPI_ISL_1271359, EPI_ISL_1271393, EPI_ISL_1271455, EPI_ISL_1271458, EPI_ISL_1271532, EPI_ISL_1271545, EPI_ISL_1271550, EPI_ISL_1271649, EPI_ISL_1271734, EPI_ISL_1271774, EPI_ISL_1271827, EPI_ISL_1271914, EPI_ISL_1335164, EPI_ISL_1368590, EPI_ISL_1478376, EPI_ISL_1478379, EPI_ISL_1478747, EPI_ISL_1559221, EPI_ISL_1559226, EPI_ISL_1559230, EPI_ISL_1559294, EPI_ISL_1559308, EPI_ISL_1742848, EPI_ISL_1743549, EPI_ISL_1896723, EPI_ISL_2011880, EPI_ISL_2011881, EPI_ISL_2012922, EPI_ISL_2141305, EPI_ISL_2141308, EPI_ISL_2141368, EPI_ISL_2141369, EPI_ISL_2141377, EPI_ISL_2250400, EPI_ISL_2250575, EPI_ISL_2251679, EPI_ISL_2252430, EPI_ISL_2364408, EPI_ISL_2452463, EPI_ISL_2922328, EPI_ISL_2922543 | Aimin Li; Alireza Eshaghi; Andre Villegas; Ashley Sullivan; Christine Franz; Dean Maxwell; Esha Joshi; Heather Rilkoﬀ; Jared Simpson; Jennifer L Guthrie; Jonathan B Gubbay; Karthekeyan Sivaraman; Lawrence Heisler; Matthew Watson; Michael CY Li; Michael Laszloffy; Nahuel Fittipaldi; Philip Bann; Richard de Borja; Samir N Patel; Sandeep Nagra; Sandra Zittermann; Sarah Teatero; Vanessa G Alami; Yao Chen; Yogi Sundaravadanan |                                                                                                                                 |                                                                                                                                                                                                                                                                                                                                                                                                                                                                                                                                                                                                                                                                                                                                                                                                                                                                                                                                          |
| see above                                                                                                                                                                                                                                                                                                                                                                                                                                                                                                                                                                                                                                                                                                                                                                                                                                                                                                                                                                                                                                                                                                                                                                                                                                                                                                                                                                      | Public Health Ontario Laboratory                                                                                                                                                                                                                                                                                                                                                                                                         | Public Health Ontario Laboratory                                                                                                | Aimin Li; Alireza Eshaghi; Andre Villegas; Ashley Sullivan; Christine Franz; Dean Maxwell; Esha Joshi; Heather Rilkoﬀ; Jared Simpson; Jennifer L Guthrie; Jonathan B Gubbay; Karthekeyan Sivaraman; Lawrence Heisler; Matthew Watson; Michael CY Li; Michael Laszloffy; Nahuel Fittipaldi; Philip Bann; Richard de Borja; Samir N Patel; Sandeep Nagra; Sandra Zittermann; Sarah Teatero; Vanessa G Alami; Yao Chen; Yogi Sundaravadanan                                                                                                                                                                                                                                                                                                                                                                                                                                                                                                 |
| EPI_ISL_2860636, EPI_ISL_2860638, EPI_ISL_2860640, EPI_ISL_2860642, EPI_ISL_2860643, EPI_ISL_2860644, EPI_ISL_2860645, EPI_ISL_2860646, EPI_ISL_2860647                                                                                                                                                                                                                                                                                                                                                                                                                                                                                                                                                                                                                                                                                                                                                                                                                                                                                                                                                                                                                                                                                                                                                                                                                        | Public Health Reference Laboratory                                                                                                                                                                                                                                                                                                                                                                                                       | Erasmus Medical Center                                                                                                          | Anne van der Linden; Annetiek van der Eijk; Bas Oude Munnink; Corine GeurtsvanKessel; David Nieuwenhuijse; Emmanuelle Munger; Irina Chestakova; Marion Koopmans; Marjan Boter; Omar Elahmer-Abdulla Basheem- Rahma Algeriani-Ahlam Alarif; Reina Sikkema; Richard Molenkamp; on behalf of the Dutch national COVID-19 response team.                                                                                                                                                                                                                                                                                                                                                                                                                                                                                                                                                                                                     |
| see above                                                                                                                                                                                                                                                                                                                                                                                                                                                                                                                                                                                                                                                                                                                                                                                                                                                                                                                                                                                                                                                                                                                                                                                                                                                                                                                                                                      | Public Health Reference Laboratory                                                                                                                                                                                                                                                                                                                                                                                                       | Erasmus Medical Center                                                                                                          | Anne van der Linden; Annetiek van der Eijk; Bas Oude Munnink; Corine GeurtsvanKessel; David Nieuwenhuijse; Emmanuelle Munger; Irina Chestakova; Marion Koopmans; Marjan Boter; Omar Elahmer-Abdulla Basheem- Rahma Algeriani-Ahlam Alarif; Reina Sikkema; Richard Molenkamp; on behalf of the Dutch national COVID-19 response team.                                                                                                                                                                                                                                                                                                                                                                                                                                                                                                                                                                                                     |
| EPI_ISL_1910858                                                                                                                                                                                                                                                                                                                                                                                                                                                                                                                                                                                                                                                                                                                                                                                                                                                                                                                                                                                                                                                                                                                                                                                                                                                                                                                                                                | Public Health Virology-Forensic and Scientific Services                                                                                                                                                                                                                                                                                                                                                                                  | Public Health Virology-Forensic and Scientific Services                                                                         | Son Nguyen                                                                                                                                                                                                                                                                                                                                                                                                                                                                                                                                                                                                                                                                                                                                                                                                                                                                                                                               |
| EPI_ISL_1495211                                                                                                                                                                                                                                                                                                                                                                                                                                                                                                                                                                                                                                                                                                                                                                                                                                                                                                                                                                                                                                                                                                                                                                                                                                                                                                                                                                | Public Health Authority of the Slovak Republic                                                                                                                                                                                                                                                                                                                                                                                           | Berghthaler laboratory, CeMM Research Center for Molecular Medicine of the Austrian Academy of Sciences                         | Andreas Berghthaler; Anna Schedl; Bekir Erguner; Benedikt Agerer; Christoph Bock; Fabian Amman; Jan Laine; Lukas Endler; Maelle Le Moing; Martin Senekowitsch; Michael Schuster; Petr Triska; Thomas Penz                                                                                                                                                                                                                                                                                                                                                                                                                                                                                                                                                                                                                                                                                                                                |
| EPI_ISL_2801898                                                                                                                                                                                                                                                                                                                                                                                                                                                                                                                                                                                                                                                                                                                                                                                                                                                                                                                                                                                                                                                                                                                                                                                                                                                                                                                                                                | Pursat Rapid Response Team                                                                                                                                                                                                                                                                                                                                                                                                               | Virology Unit, Institut Pasteur du Cambodge                                                                                     | Cecile Troupin; Chau Darapeak; Chin Savuth; Erik A Karlsson; Jurje Y Siegers; Kraing Sidonn; Leakhena Pum; Ly Sovann; Veasna Duong; Yi Sengdoeum                                                                                                                                                                                                                                                                                                                                                                                                                                                                                                                                                                                                                                                                                                                                                                                         |
| EPI_ISL_1055477, EPI_ISL_1055478, EPI_ISL_1055481, EPI_ISL_1055483, EPI_ISL_1055485, EPI_ISL_1055486, EPI_ISL_1055487, EPI_ISL_1055488, EPI_ISL_1055489, EPI_ISL_1055490, EPI_ISL_1055505, EPI_ISL_1055506, EPI_ISL_1055513, EPI_ISL_1055515, EPI_ISL_1055602, EPI_ISL_1055688                                                                                                                                                                                                                                                                                                                                                                                                                                                                                                                                                                                                                                                                                                                                                                                                                                                                                                                                                                                                                                                                                                 | QEII Health Sciences Centre                                                                                                                                                                                                                                                                                                                                                                                                              | National Microbiology Laboratory (NML)                                                                                          | Anna Majer; Anneliese Landgraf; CanCOGeM's metadata curation team; Dan Gaston; Darian Hole; Elsie Grudeski; Gary Van Domselaar; Grace Seo; Janice Pettipas; Jason LeBlanc; Jennifer Tanner; Kirsten Biggar; Madison Chapel; Morag Graham; Natalie Knox; Nathalie Bastien; Philip Mabon; Public Health Agency of Canada CanCOGeN team; Rhiannon Huzarewicz; Russell Mandes; Shari Tyson; Timothy Booth; Todd Hatcher; Yan Li                                                                                                                                                                                                                                                                                                                                                                                                                                                                                                              |
| EPI_ISL_493545, EPI_ISL_493546, EPI_ISL_2519670                                                                                                                                                                                                                                                                                                                                                                                                                                                                                                                                                                                                                                                                                                                                                                                                                                                                                                                                                                                                                                                                                                                                                                                                                                                                                                                                | Quadram Institute Bioscience                                                                                                                                                                                                                                                                                                                                                                                                             | COVID-19 Genomics UK (COG-UK) Consortium                                                                                        | Alexander J Trotter; Alison E. Mather; Alp Aydin; Ana P. Tedim; Anastasia Kolyva; Andrew Bell; Andrew J. Page; Claire Stuart; Dave J. Baker; Gemma L. Kay; John Wain; Justin O'Grady; Leonardo de Oliveira Martins; Lizzie Meadows; Maria Diaz; Mark Webber; Muhammed Yasir; Nabil-Fareed Alkhan; Ngozi Elumogo; Nicholas M. Thomson; Rachael Stanley; Rachel Gilroy; Reenesh Prakash; Samir Dervisevic; Samuel Bloomfield; Steven Rudder; Thanh Le-Viet                                                                                                                                                                                                                                                                                                                                                                                                                                                                                 |
| EPI_ISL_2860172                                                                                                                                                                                                                                                                                                                                                                                                                                                                                                                                                                                                                                                                                                                                                                                                                                                                                                                                                                                                                                                                                                                                                                                                                                                                                                                                                                | Qualimed Hospital Sta. Rosa                                                                                                                                                                                                                                                                                                                                                                                                              | Philippine Genome Center                                                                                                        | Althea R. de Guzman; Anna Ong-Lim; Arianne A. Zamora; Benedict A. Maralit; Carlo M. Lapid; Celia Carlos; Devon Ray Pacial; Diomedes A. Carino; Edsel Maurice Salvaña; El King D. Morado; Elcid Aaron R. Panglinan; Eva Maria Cutiongco-de la Paz; Francis A. Talibzo; Henrietta Marie Rodriguez; Jaime C. Montoya; Jan Michael C. Yap; Jarvin E. Nipales; Jo-Hannah S. Llamas; John E. Wong; Joshua Gregor A. Dizon; Juan Antonio R. Magalang; Karol Sophia Agape R. Padilla; Kenneth M. Kim; Kris P. Punayan; Kristina Patriz Dela Cruz; Lindsay Claire D.L. Carandang; Ma. Exanili Plantig; Marc Edsel C. Ayes; Maria Rosario Singh-Vergeire and Cynthia P. Saloma; Maria Sofia L. Yanzon; Marielle M Gamboa; Marissa Alejandra; Nina Francesca Bustamante; Razel Nikka M. Hao; Renato Jacinto Q. Mantaring; Rianna Patricia S. Cruz; Sheila Mae M. Araiza; Yvonne Valerie Austria; Zipporah Mariebelle R. Enriquez; Zryel V. Mollejon |
| EPI_ISL_820573, EPI_ISL_820578, EPI_ISL_820607                                                                                                                                                                                                                                                                                                                                                                                                                                                                                                                                                                                                                                                                                                                                                                                                                                                                                                                                                                                                                                                                                                                                                                                                                                                                                                                                 | Queens Medical Centre, Clinical Microbiology Department / DeepSeq Nottingham                                                                                                                                                                                                                                                                                                                                                             | COVID-19 Genomics UK (COG-UK) Consortium                                                                                        | Christopher Moore; Fei Sang; Gemma Clark; Hannah Howson-Wells; Johnny Debebe; Jonathan Ball; Joseph Chappell; Manjinder Khakh; Matthew Carlisle; Matthew Loose; Michelle M Lister; Nadine Holmes; Patrick McClure; Theocharis Tsoleridis; Vicki M Fleming; Victoria Wright; Wendy Smith                                                                                                                                                                                                                                                                                                                                                                                                                                                                                                                                                                                                                                                  |
| EPI_ISL_593616, EPI_ISL_593617, EPI_ISL_693269, EPI_ISL_693290, EPI_ISL_849686, EPI_ISL_849694, EPI_ISL_849754, EPI_ISL_1465893, EPI_ISL_1516885, EPI_ISL_1516886, EPI_ISL_1516888, EPI_ISL_1563670, EPI_ISL_1563678, EPI_ISL_1633659, EPI_ISL_1754858, EPI_ISL_1910859, EPI_ISL_1938308, EPI_ISL_2137034, EPI_ISL_2137035, EPI_ISL_2137036, EPI_ISL_2274244, EPI_ISL_2274245, EPI_ISL_2274246, EPI_ISL_2274248, EPI_ISL_2283730, EPI_ISL_2385970, EPI_ISL_2385974, EPI_ISL_2507086, EPI_ISL_2507088, EPI_ISL_2507089, EPI_ISL_2507095, EPI_ISL_2603820, EPI_ISL_2661522, EPI_ISL_2661525, EPI_ISL_2675252, EPI_ISL_2675253, EPI_ISL_2727637, EPI_ISL_2811889, EPI_ISL_2811892, EPI_ISL_2811904, EPI_ISL_2842840, EPI_ISL_2842841, EPI_ISL_2842842, EPI_ISL_2842843, EPI_ISL_2896248, EPI_ISL_2896249, EPI_ISL_2956008, EPI_ISL_2993362, EPI_ISL_2993401, EPI_ISL_2993405, EPI_ISL_2993415, EPI_ISL_2993422, EPI_ISL_2993425, EPI_ISL_2993426, EPI_ISL_2993427                                                                                                                                                                                                                                                                                                                                                                                                                 | Queensland Health Forensic and Scientific Services                                                                                                                                                                                                                                                                                                                                                                                       | Queensland Health Forensic and Scientific Services                                                                              |                                                                                                                                                                                                                                                                                                                                                                                                                                                                                                                                                                                                                                                                                                                                                                                                                                                                                                                                          |
| see above                                                                                                                                                                                                                                                                                                                                                                                                                                                                                                                                                                                                                                                                                                                                                                                                                                                                                                                                                                                                                                                                                                                                                                                                                                                                                                                                                                      | Queensland Health Forensic and Scientific Services                                                                                                                                                                                                                                                                                                                                                                                       | Queensland Health Forensic and Scientific Services                                                                              | Son Nguyen; Son Nguyen et al; Son Nguyen et al.                                                                                                                                                                                                                                                                                                                                                                                                                                                                                                                                                                                                                                                                                                                                                                                                                                                                                          |
| EPI_ISL_530239, EPI_ISL_530279                                                                                                                                                                                                                                                                                                                                                                                                                                                                                                                                                                                                                                                                                                                                                                                                                                                                                                                                                                                                                                                                                                                                                                                                                                                                                                                                                 | Queensland Health Forensic and Scientific Services, Public Health Virology                                                                                                                                                                                                                                                                                                                                                               | Public Health Virology Laboratory, Forensic and Scientific Services, Queensland Health                                          | Son Nguyen et al                                                                                                                                                                                                                                                                                                                                                                                                                                                                                                                                                                                                                                                                                                                                                                                                                                                                                                                         |
| EPI_ISL_1424519                                                                                                                                                                                                                                                                                                                                                                                                                                                                                                                                                                                                                                                                                                                                                                                                                                                                                                                                                                                                                                                                                                                                                                                                                                                                                                                                                                | Queensland Medical Laboratories                                                                                                                                                                                                                                                                                                                                                                                                          | Victorian Infectious Diseases Reference Laboratory (VIDRL) and the Melbourne Diagnostic Unit Public Health Laboratory (MDU-PHL) | N.L.; Palou, T.; Seemann, T.; Sherry; Vaccher, S.                                                                                                                                                                                                                                                                                                                                                                                                                                                                                                                                                                                                                                                                                                                                                                                                                                                                                        |
| EPI_ISL_494533, EPI_ISL_571261, EPI_ISL_571975, EPI_ISL_604114                                                                                                                                                                                                                                                                                                                                                                                                                                                                                                                                                                                                                                                                                                                                                                                                                                                                                                                                                                                                                                                                                                                                                                                                                                                                                                                 | Quest Diagnostics                                                                                                                                                                                                                                                                                                                                                                                                                        | Quest Diagnostics                                                                                                               | Anderson; Anderson, B.; B.P.; D.F.; Gerasimova, A.; Grover, D.; Hua, M.; K.E.; Kagan; Lacbawan, F.; Liu, Y.; Livingston; Owen, R.; R.M.; R.M. and Owen, R.; Rosenthal; S.H.; Shalhout                                                                                                                                                                                                                                                                                                                                                                                                                                                                                                                                                                                                                                                                                                                                                    |
| EPI_ISL_1220443, EPI_ISL_1253267, EPI_ISL_1648870, EPI_ISL_1668705, EPI_ISL_1753408, EPI_ISL_1762016, EPI_ISL_1818271, EPI_ISL_1924348, EPI_ISL_1989864, EPI_ISL_2047081, EPI_ISL_2143545, EPI_ISL_2143956, EPI_ISL_2180464, EPI_ISL_2247212, EPI_ISL_2247292, EPI_ISL_2371834, EPI_ISL_2371912, EPI_ISL_2397489, EPI_ISL_2451305, EPI_ISL_2649980, EPI_ISL_2652295, EPI_ISL_2652368, EPI_ISL_2869180, EPI_ISL_2874567, EPI_ISL_2874761, EPI_ISL_2875140, EPI_ISL_2876694, EPI_ISL_2876857, EPI_ISL_2930261                                                                                                                                                                                                                                                                                                                                                                                                                                                                                                                                                                                                                                                                                                                                                                                                                                                                    | Quest Diagnostics Incorporated                                                                                                                                                                                                                                                                                                                                                                                                           | Centers for Disease Control and Prevention Division of Viral Diseases, Pathogen Discovery                                       | A. Gerasimova; A. Perez; Adrian Paskey; B. Anderson; Ben L. Rambo-Martin; Benjamin Rambo-Martin; Christopher Gulvick; Clinton R. Paden; Dakota Howard; Darlene Wagner; Dhvani Batra; Duncan MacCannell; F. Lacbawan; I. A. Shlyakhter; Jason Caravas; K.E. Livingston; Kara Moser; L.E. Bernstein; M. Hua; Matthew Schmerer; P. Tanpaiboon; Peter W. Kagan; R. Owen; R. V. Rolando; S. H. Rosenthal; Scott Sammons; Shantava Morrison; Suxiang Tong; Y. Liu; Yvette Unoarumhi                                                                                                                                                                                                                                                                                                                                                                                                                                                            |
| EPI_ISL_1086247, EPI_ISL_1087772, EPI_ISL_1087817                                                                                                                                                                                                                                                                                                                                                                                                                                                                                                                                                                                                                                                                                                                                                                                                                                                                                                                                                                                                                                                                                                                                                                                                                                                                                                                              | Quest Diagnostics Incorporated                                                                                                                                                                                                                                                                                                                                                                                                           | Respiratory Viruses Branch, Division of Viral Diseases, Centers for Disease Control and Prevention                              | A. Gerasimova; A. Perez; B. Anderson; Ben L. Rambo-Martin; Clinton R. Paden; Dakota Howard; Dhvani Batra; Duncan MacCannell; F. Lacbawan; I. A. Shlyakhter; K.E. Livingston; L.E. Bernstein; M. Hua; P. Tanpaiboon; Peter W. Cook; R. M. Kagan; R. Owen; R. V. Rolando; S. H. Rosenthal; Suxiang Tong; Y. Liu                                                                                                                                                                                                                                                                                                                                                                                                                                                                                                                                                                                                                            |
| EPI_ISL_1711855                                                                                                                                                                                                                                                                                                                                                                                                                                                                                                                                                                                                                                                                                                                                                                                                                                                                                                                                                                                                                                                                                                                                                                                                                                                                                                                                                                | RI State Health Laboratories                                                                                                                                                                                                                                                                                                                                                                                                             | Centers for Disease Control and Prevention Division of Viral Diseases, Pathogen Discovery                                       | Alison Lauffer Halpin; Ben L. Rambo-Martin; Clinton R. Paden; Dakota Howard; Darlene Wagner; Dave Wentworth; Dhvani Batra; Jasmine Padilla; Justin Lee; Katie Dillon; Krista Queen; Kristen Knipe; Kristine Lacek; Mark Burroughs; Matthew Schmerer; Mili Sheth; Peter Cook; Sam Shepard; Sarah Nobles; Shoshona Le; Suxiang Tong; Vivien Dugan; Yvette Unoarumhi                                                                                                                                                                                                                                                                                                                                                                                                                                                                                                                                                                        |
| EPI_ISL_2531885, EPI_ISL_2531926, EPI_ISL_2531934                                                                                                                                                                                                                                                                                                                                                                                                                                                                                                                                                                                                                                                                                                                                                                                                                                                                                                                                                                                                                                                                                                                                                                                                                                                                                                                              | RIIP                                                                                                                                                                                                                                                                                                                                                                                                                                     | National Reference Center for Viruses of Respiratory Infections, Institut Pasteur, Paris                                        | Angela Brisebarre; Camille Capel; Christophe Malabat; Corinne Maufrais; Etienne Simon-Lorière; Frédéric Lemoine; Louise Lefrançois; Marion Barbet; Maud Vanpeene; Méline Bizard; Stéphanie Guyomard-Rabenirina; Sylvie Behilli; Sylvie Van der Werf; Vincent Enouf                                                                                                                                                                                                                                                                                                                                                                                                                                                                                                                                                                                                                                                                       |
| EPI_ISL_413581                                                                                                                                                                                                                                                                                                                                                                                                                                                                                                                                                                                                                                                                                                                                                                                                                                                                                                                                                                                                                                                                                                                                                                                                                                                                                                                                                                 | RIVM                                                                                                                                                                                                                                                                                                                                                                                                                                     | Erasmus Medical Center                                                                                                          | Anne van der Linden; Annetiek van der Eijk; Aura Timen; Bas Oude Munnink; Claudia Schapendonk; Corien Swaan; Corine GeurtsvanKessel; David Nieuwenhuijse; Irina Chestakova; Jeroen van Kampen; Jolanda Voermans; Madelief Molters; Manon Haverkate; Marion Koopmans; Mark Pronk; Mart Stein; Pascal Lexmond; Reina Sikkema; Richard Molenkamp; Sandra Kengne Kamga Mobou; on behalf of the Dutch national COVID-19 response team.                                                                                                                                                                                                                                                                                                                                                                                                                                                                                                        |
| EPI_ISL_2086951, EPI_ISL_2273059, EPI_ISL_2273060, EPI_ISL_2273061, EPI_ISL_2273063, EPI_ISL_2273065, EPI_ISL_2273067, EPI_ISL_2273068, EPI_ISL_2273075, EPI_ISL_2273082, EPI_ISL_2273087, EPI_ISL_2442379, EPI_ISL_2444106, EPI_ISL_2454669, EPI_ISL_2454670, EPI_ISL_2454683, EPI_ISL_2454685, EPI_ISL_2454688, EPI_ISL_2454690, EPI_ISL_2454695, EPI_ISL_2582830, EPI_ISL_2582833, EPI_ISL_2695608, EPI_ISL_2695609, EPI_ISL_2695615, EPI_ISL_2695620, EPI_ISL_2695621, EPI_ISL_2695625, EPI_ISL_2695625, EPI_ISL_2695754, EPI_ISL_2695755, EPI_ISL_2695763, EPI_ISL_2695764, EPI_ISL_2695767, EPI_ISL_2695771                                                                                                                                                                                                                                                                                                                                                                                                                                                                                                                                                                                                                                                                                                                                                              | ROB FERREIRA LABORATORY                                                                                                                                                                                                                                                                                                                                                                                                                  | National Institute for Communicable Diseases of the National                                                                    | Amoako DG; Bhiman JN; Everatt J; Ismail A; Mahlangu B; Mnquni A; Mohale T; Ntuli N; Scheepers C                                                                                                                                                                                                                                                                                                                                                                                                                                                                                                                                                                                                                                                                                                                                                                                                                                          |
| see above                                                                                                                                                                                                                                                                                                                                                                                                                                                                                                                                                                                                                                                                                                                                                                                                                                                                                                                                                                                                                                                                                                                                                                                                                                                                                                                                                                      | ROB FERREIRA LABORATORY                                                                                                                                                                                                                                                                                                                                                                                                                  | National Institute for Communicable Diseases of the National                                                                    | Amoako DG; Bhiman JN; Everatt J; Ismail A; Mahlangu B; Mnquni A; Mohale T; Ntuli N; Scheepers C                                                                                                                                                                                                                                                                                                                                                                                                                                                                                                                                                                                                                                                                                                                                                                                                                                          |

|                                                                                                                                        |                                                                              | Health Laboratory Service                                                                                                                                                                                                                                                                                                                                                                                                                                                                                                                                |                                                                                                                                                                                                                                                                                                                                                                                                                                                      |
|----------------------------------------------------------------------------------------------------------------------------------------|------------------------------------------------------------------------------|----------------------------------------------------------------------------------------------------------------------------------------------------------------------------------------------------------------------------------------------------------------------------------------------------------------------------------------------------------------------------------------------------------------------------------------------------------------------------------------------------------------------------------------------------------|------------------------------------------------------------------------------------------------------------------------------------------------------------------------------------------------------------------------------------------------------------------------------------------------------------------------------------------------------------------------------------------------------------------------------------------------------|
| EPI_ISL_3138836                                                                                                                        | RS Jantung Dan Pembuluh Darah Harapan Kita                                   | National Institute of Health Research and Development                                                                                                                                                                                                                                                                                                                                                                                                                                                                                                    | Arie Ardiansyah Nugraha; Fajar Nur Sulistiyohadi; Hana Apsari Pawestri; Hartanti Dian Ikawati; Kartika Dewi Puspa; Krisna Pangesti; Nelly Puspandari; Subangkit; Triyani Soekarso; Vivi Setiawaty                                                                                                                                                                                                                                                    |
| EPI_ISL_763064                                                                                                                         | RS Kasih Ibu, Surakarta                                                      | Universitas Sebelas Maret (UNS); Rumah Sakit UNS (RS-UNS); National Institute of Health Research and Development, Indonesian Ministry of Health.                                                                                                                                                                                                                                                                                                                                                                                                         | Affif A Ghufnur; Arie A Nugraha; Betty Suryawati; Dewi Puspa; Hana A Pawestri; Hartanti Dian Ika; Hartono; Kartika; Maryani; Revi G H Novika; Vivi Setiawaty; Yulia Sari                                                                                                                                                                                                                                                                             |
| EPI_ISL_2987618                                                                                                                        | RS Mata Cicendo Bandung                                                      | National Institute of Health Research and Development                                                                                                                                                                                                                                                                                                                                                                                                                                                                                                    | Arie Ardiansyah Nugraha; Fajar Nur Sulistiyohadi; Hana Apsari Pawestri; Hartanti Dian Ikawati; Kartika Dewi Puspa; Krisna Pangesti; Nelly Puspandari; Subangkit; Triyani Soekarso; Vivi Setiawaty                                                                                                                                                                                                                                                    |
| EPI_ISL_574611                                                                                                                         | RS Premier Bintaro                                                           | Eijkman Institute for Molecular Biology, Ministry of Research and Technology/National Agency for Research and Innovation                                                                                                                                                                                                                                                                                                                                                                                                                                 | Amin Soebandrio; David H Muljono; Edison Johar; Frilasita A Yudhaputri; Herawati Sudoyo; Hidayat Trimarsanto; Iskandar A Adnan; Khin Saw Myint; Safarina G Malik; Willy Agustine                                                                                                                                                                                                                                                                     |
| EPI_ISL_2709370                                                                                                                        | RS Pusat Pertamina                                                           | Eijkman Institute for Molecular Biology, National Research and Innovation Agency                                                                                                                                                                                                                                                                                                                                                                                                                                                                         | Amin Soebandrio; Edison Johar; Frilasita A Yudhaputri; Hidayat Trimarsanto; Iskandar Adnan; Khin Saw Myint; Lidwina Priliani; Lydia V. Panggalo; Muhammad Rezki Rasyak; Safarina G Malik; Sukma Oktavianthi; Willy Agustine                                                                                                                                                                                                                          |
| EPI_ISL_2262254, EPI_ISL_2262265                                                                                                       | RS Umum Kartika Pulomas                                                      | National Institute of Health Research and Development                                                                                                                                                                                                                                                                                                                                                                                                                                                                                                    | Arie Ardiansyah Nugraha; Hana Apsari Pawestri; Hartanti Dian Ikawati; Kartika Dewi Puspa; Krisna Pangesti; Nelly Puspandari; Subangkit; Triyani Soekarso; Vivi Setiawaty                                                                                                                                                                                                                                                                             |
| EPI_ISL_906051                                                                                                                         | RSA UGM                                                                      | Genetics Working Group (Pokja Genetik) Faculty of Medicine, Public Health and Nursing Universitas Gadjah Mada (FK-KMK UGM); Disease Investigation Center Wates Ministry of Agriculture Indonesia; Department of Microbiology FK-KMK UGM; Laboratorium Diagnostik Yayasan Tahija World Mosquito Program (WMP) Yogyakarta Center for Tropical Medicine FK-KMK UGM; Integrated Research center FK-KMK UGM; Department of Computer Science and Electronics FMIPA UGM                                                                                         | Afahayati; Alvin Santoso Kalim; Dwi AA Nugrahaningsih; Dwiki Afandy; Edwin W. Daniwijaya; Eggi Arguni; Endah Supriyati; Gunadi; Hendra Wibawa; Kristy Iskandar; Ludhang P. Rizki; Marcellus; Mohamad S. Hakim; Nungki Anggorowati; Siswanto; Titik Nuryastuti; Tri Wibawa                                                                                                                                                                            |
| EPI_ISL_454520                                                                                                                         | RSE "National Center for Biotechnology"                                      | RSE "National Center for Biotechnology"                                                                                                                                                                                                                                                                                                                                                                                                                                                                                                                  | Akbota Rakhmetova; Alexandr Shevtsov; Askar Abdaliyev; Asylun Amirgazin; Ilyas Akhmetolayev; Ruslan Kalendar; Viktoriya Lutsay; Yerlan Ramankulov; Zabira Aushakhmetova                                                                                                                                                                                                                                                                              |
| EPI_ISL_947247                                                                                                                         | RSU Bunda Mulia                                                              | Eijkman Institute for Molecular Biology, Ministry of Research and Technology/National Agency for Research and Innovation                                                                                                                                                                                                                                                                                                                                                                                                                                 | Amin Soebandrio; Edison Johar; Frilasita A Yudhaputri; Hidayat Trimarsanto; Iskandar Adnan; Khin Saw Myint; Lydia V. Panggalo; Safarina G Malik; Sukma Oktavianthi; Willy Agustine                                                                                                                                                                                                                                                                   |
| EPI_ISL_947298                                                                                                                         | RSU Medirosa                                                                 | Eijkman Institute for Molecular Biology, Ministry of Research and Technology/National Agency for Research and Innovation                                                                                                                                                                                                                                                                                                                                                                                                                                 | Amin Soebandrio; Edison Johar; Frilasita A Yudhaputri; Hidayat Trimarsanto; Iskandar Adnan; Khin Saw Myint; Lydia V. Panggalo; Safarina G Malik; Sukma Oktavianthi; Willy Agustine                                                                                                                                                                                                                                                                   |
| EPI_ISL_560991                                                                                                                         | RSUD Dr. Soetomo                                                             | Institute of Tropical Disease, Universitas Airlangga                                                                                                                                                                                                                                                                                                                                                                                                                                                                                                     | Aldise M Nastri; Gatot Soegiarto; Jezzy R Dewantari; Joni Wahyuhadi; Kazufumi Shimizu; Krisnoadi Rahardjo; Laksmi Wulandari; Maria I Lusida; Mitsuhiro Nishimura; Resti Yudhawati; Retno A Setyoningrum; Rima R Prasetya; Soetjpto; Yasuko Mori; Yohko K Shimizu                                                                                                                                                                                     |
| EPI_ISL_610162, EPI_ISL_1005696                                                                                                        | RSUD Dr. Tjitrowardoyo                                                       | Genetics Working Group (Pokja Genetik) Faculty of Medicine, Public Health and Nursing Universitas Gadjah Mada (FK-KMK UGM); Disease Investigation Center Wates Ministry of Agriculture Indonesia; Department of Microbiology FK-KMK UGM; Laboratorium Diagnostik Yayasan Tahija World Mosquito Program (WMP) Yogyakarta Center for Tropical Medicine FK-KMK UGM; Integrated Research Center FK-KMK UGM; Department of Computer Science and Electronics FMIPA UGM; Balai Besar Teknik Kesehatan Lingkungan dan Pengendalian Penyakit (BBTKLPP) Yogyakarta | Afahayati; Alvin Santoso Kalim; Arry Setyowati; Chusni Mubarak; Dwi AA Nugrahaningsih; Edwin W. Daniwijaya; Eggi Arguni; Endah Supriyati; Gunadi; Havid Setyawan; Hendra Wibawa; Indaryati; Irene; Kristy Iskandar; Ludhang P. Rizki; Marcellus; Mohamad S. Hakim; Nungki Anggorowati; Siswanto; Susan Simanjaya; Titik Nuryastuti; Tri Wibawa; Try Nirmala Sari; Wuryanto                                                                           |
| EPI_ISL_2854750                                                                                                                        | RSUD Dr. W.Z. Johannes kupang                                                | National Institute of Health Research and Development                                                                                                                                                                                                                                                                                                                                                                                                                                                                                                    | Arie Ardiansyah Nugraha; Hana Apsari Pawestri; Hartanti Dian Ikawati; Kartika Dewi Puspa; Krisna Pangesti; Nelly Puspandari; Subangkit; Triyani Soekarso; Vivi Setiawaty                                                                                                                                                                                                                                                                             |
| EPI_ISL_2631472                                                                                                                        | RSUD Karawang                                                                | Indonesian Institute of Sciences (LIPI)/National Agency of Research and Innovation (BRIN) and National Institute of Health Research and Development (NIHRD)                                                                                                                                                                                                                                                                                                                                                                                              | Andri Wardiana; Herjuno A. Nugroho; Idris; Indriawati; Isa Nuryana; Listiana Oktavia; Puspita Lisdianti; Sri Swasthikawati; Subangkit; Sugiyono Saputra; Syam B. Iryanto; Vivi Setiawaty; Yayuk Sri Rahayu; Yuliawati                                                                                                                                                                                                                                |
| EPI_ISL_632937                                                                                                                         | RSUD Saptosari Gunung Kidul                                                  | Genetics Working Group (Pokja Genetik) Faculty of Medicine, Public Health and Nursing Universitas Gadjah Mada (FK-KMK UGM); Disease Investigation Center Wates Ministry of Agriculture Indonesia; Department of Microbiology FK-KMK UGM; Laboratorium Diagnostik Yayasan Tahija World Mosquito Program (WMP) Yogyakarta Center for Tropical Medicine FK-KMK UGM; Integrated Research Center FK-KMK UGM; Department of Computer Science and Electronics FMIPA UGM; Balai Besar Teknik Kesehatan Lingkungan dan Pengendalian Penyakit (BBTKLPP) Yogyakarta | Afahayati; Audric Kenny Tedja; Dwi AA Nugrahaningsih; Edwin W. Daniwijaya; Eggi Arguni; Eko Darmawan; Endah Supriyati; Gunadi; Havid Setyawan; Hendra Wibawa; Indaryati; Irene; Kristy Iskandar; Ludhang P. Rizki; Marcellus; Maria Patricia Inggriani; Mohamad S. Hakim; Nungki Anggorowati; Siswanto; Titik Nuryastuti; Tri Wibawa                                                                                                                 |
| EPI_ISL_1824615                                                                                                                        | RSUD dr. Hasri Anun Habibie Gorontalo                                        | National Institute of Health Research and Development                                                                                                                                                                                                                                                                                                                                                                                                                                                                                                    | Arie Ardiansyah Nugraha; Hana Apsari Pawestri; Hartanti Dian Ikawati; Kartika Dewi Puspa; Krisna Pangesti; Nelly Puspandari; Subangkit; Vivi Setiawaty                                                                                                                                                                                                                                                                                               |
| EPI_ISL_2824996                                                                                                                        | RSUP Dr. Hasan Sadikin Bandung                                               | Genomik Solidaritas Indonesia Laboratorium                                                                                                                                                                                                                                                                                                                                                                                                                                                                                                               | Alfin Mohammad Abdillah; Anna Christina Brazia; Annisa Muthiah Sukirman; Anuraj Shankar; Ariel Pradipta; Basti Andriyoko; Carissa Sintca Wijaya; Delita Prihatni; Dewi Kartika Turbawati; Dhalhia Agustina Cahyono; Gracia Felias Enos Korompi; Louisa Markus; Meutia Ayuputeri Kumaheri; Normastuti Adhini Tanyto; Reinhart Gabriel; Vania Gavriila Wikasa; Vivi Setyawati                                                                          |
| EPI_ISL_766032                                                                                                                         | RSUP Dr. Sardjito                                                            | Eijkman Institute for Molecular Biology, Ministry of Research and Technology/National Agency for Research and Innovation                                                                                                                                                                                                                                                                                                                                                                                                                                 | Amin Soebandrio; David H Muljono; Edison Johar; Frilasita A Yudhaputri; Hidayat Trimarsanto; Khin Saw Myint; Safarina G Malik                                                                                                                                                                                                                                                                                                                        |
| EPI_ISL_1824606                                                                                                                        | RSUP Sanglah                                                                 | National Institute of Health Research and Development                                                                                                                                                                                                                                                                                                                                                                                                                                                                                                    | Arie Ardiansyah Nugraha; Hana Apsari Pawestri; Hartanti Dian Ikawati; I Gede Ketut Sajinadyasa; I Nengah Tony Rustawan; Kartika Dewi Puspa; Krisna Pangesti; Nelly Puspandari; Subangkit; Vivi Setiawaty                                                                                                                                                                                                                                             |
| EPI_ISL_2827879, EPI_ISL_2827884, EPI_ISL_2827886, EPI_ISL_2895681, EPI_ISL_2895682, EPI_ISL_2895683, EPI_ISL_2895690, EPI_ISL_2895693 | see above                                                                    | RUSTENBURG LABORATORY                                                                                                                                                                                                                                                                                                                                                                                                                                                                                                                                    | Amoako DG; Bhiman JN; Everatt J; Ismail A; Mahlangu B; Mnguni A; Mohale T; Ntuli N; Scheepers C                                                                                                                                                                                                                                                                                                                                                      |
| EPI_ISL_450508, EPI_ISL_450515                                                                                                         | Rafik Hariri University Hospital                                             | Rafik Hariri University Hospital                                                                                                                                                                                                                                                                                                                                                                                                                                                                                                                         | Rita Feghali                                                                                                                                                                                                                                                                                                                                                                                                                                         |
| EPI_ISL_2678109                                                                                                                        | Ramathibodi Chakri Naruebodindra Hospital                                    | COVID-19 Network Investigations (CONI) Alliance                                                                                                                                                                                                                                                                                                                                                                                                                                                                                                          | Angkana Huang; Anthony R. Jones; Arporn Wangwiwatsin; Bhakbhoom Panthan; Chonticha Klungtong; Duangkamon Loesbanluechai; Ekawat Pasomsub; Elizabeth Batty; Insee Semsorn; Janjira Thaipadungpanit; Khajohn Joonlasak; Kingkan Rakmanee; Krittikorn Kumpornsin; Namfon Kotanan; Stefan Fernandez; Thanat Chookajorn; Theerarat Chookajorn; Treewat Watthanachockchai; Wasun Chantratita; Wudtichai Manasatienkij                                      |
| EPI_ISL_429168, EPI_ISL_2104753, EPI_ISL_2678105, EPI_ISL_2802837, EPI_ISL_2802852, EPI_ISL_2802853, EPI_ISL_2928525                   | see above                                                                    | Ramathibodi Hospital                                                                                                                                                                                                                                                                                                                                                                                                                                                                                                                                     | Angkana Huang; Anthony R. Jones; Arporn Wangwiwatsin; Bhakbhoom Panthan; Chonticha Klungtong; Duangkamon Loesbanluechai; Ekawat Pasomsub; Elizabeth Batty; Insee Semsorn; Janjira Thaipadungpanit; Khajohn Joonlasak; Khajohn Joonlasak; Kingkan Rakmanee; Krittikorn Kumpornsin; Namfon Kotanan; Poramate Jaranai; Stefan Fernandez; Thanat Chookajorn; Theerarat Chookajorn; Treewat Watthanachockchai; Wasun Chantratita; Wudtichai Manasatienkij |
| EPI_ISL_1275880, EPI_ISL_1275902                                                                                                       | Randox Laboratories                                                          | Wellcome Sanger Institute for the COVID-19 Genomics UK (COG-UK) Consortium                                                                                                                                                                                                                                                                                                                                                                                                                                                                               | Cordelia Langford; David K. Jackson; Dominic Kwiatkowski; Ewan Harrison; Ian Johnston; Jeffrey Barrett; John Sillitoe on behalf of the Wellcome Sanger Institute COVID-19 Surveillance Team; Randox Laboratories and Alex Alderton; Roberto Amato; Sonia Goncalves                                                                                                                                                                                   |
| EPI_ISL_2433337                                                                                                                        | Rattaphum Hospital                                                           | Division of Genomic Medicine and Innovation support, Department of Medical Sciences, Ministry of Public Health, Thailand                                                                                                                                                                                                                                                                                                                                                                                                                                 | Archawin Rojanawiwat; Jirapha Pakdee; Natthakul Bunneang; Nuanjun Wichukchinda; Penpitcha Thawong; Pilailuk Akkapaiboon Okada; Pundharika Piboonsiri; Surakameth Mahasirimongkol; Waritta Sawaengdee                                                                                                                                                                                                                                                 |
| EPI_ISL_2157357                                                                                                                        | Red - Regional de Vigilancia Genómica del COVID-19                           | Laboratory of Respiratory Viruses and Measles, Oswaldo Cruz Institute, FIOCRUZ                                                                                                                                                                                                                                                                                                                                                                                                                                                                           | Alice Sampaio Rocha; Ana Carolina Mendonca; Anna Carolina Paixao; Claudia Diaz; Eliisa Cavalcante Pereira; Fernando Motta; Luciana Appolinario; Marilda Siqueira on behalf of the Fiocruz COVID-19 Genomic Surveillance Network; Mitzi Castro; Paola Resende; Renata Serrano Lopes; Sandra Paola Paz; Taina Venas                                                                                                                                    |
| EPI_ISL_1415406, EPI_ISL_1415407, EPI_ISL_1415412, EPI_ISL_1415413, EPI_ISL_1415419                                                    | Reference Laboratory of the Ministry of Health                               | Laboratory of Respiratory Viruses and Measles, Oswaldo Cruz Institute, FIOCRUZ                                                                                                                                                                                                                                                                                                                                                                                                                                                                           | Alice Sampaio Rocha; Ana Carolina Mendonca; Anna Carolina Paixao; Fernando Motta; Indira Martins; Jessica Edwards; Luciana Appolinario; Marilda Siqueira on behalf of the Fiocruz COVID-19 Genomic Surveillance Network; Paola Resende; Renata Serrano Lopes                                                                                                                                                                                         |
| EPI_ISL_2982838, EPI_ISL_2982850, EPI_ISL_2982851, EPI_ISL_2982858, EPI_ISL_2982860, EPI_ISL_2982861, EPI_ISL_2982863                  | see above                                                                    | Reference Laboratory of the Ministry of Health Royal Victoria Gardens                                                                                                                                                                                                                                                                                                                                                                                                                                                                                    | Agatha Cristinne Prudencio; Alice Sampaio Rocha; Ana Carolina Mendonca; Anna Carolina Paixao; Elisa Cavalcante Pereira; Fernando Motta; Ighor Leonardo Arantes Gomes; Indira Martins; Jessica Edwards; Luciana Appolinario; Marilda Siqueira on behalf of the Fiocruz COVID-19 Genomic Surveillance Network; Paola Resende; Renata Serrano Lopes; Taina Venas                                                                                        |
| EPI_ISL_2276073, EPI_ISL_2276076                                                                                                       | Regional Authority of Public Health Trenčín                                  | Veterinary institute in Zvolen Slovakia                                                                                                                                                                                                                                                                                                                                                                                                                                                                                                                  | ; Natchaya Khiasang; Pakorn Piromtong; Pilailuk Okada; Ratana Tacharoenmuang; Siripaporn Phuygun; Sittiporn Parmmen; Sunthareeya Waicharoen; Thanutsapa Thanadachakul; Warawan Wongboot; sirikanda wimol                                                                                                                                                                                                                                             |
| EPI_ISL_768617                                                                                                                         | Regional Medical Sciences Center 5 Samut Songkhram                           | National Institute of Health, Department of Medical Sciences, Ministry of Public Health, Thailand                                                                                                                                                                                                                                                                                                                                                                                                                                                        | ; Natchaya Khiasang; Pakorn Piromtong; Pilailuk Okada; Ratana Tacharoenmuang; Siripaporn Phuygun; Sittiporn Parmmen; Sunthareeya Waicharoen; Thanutsapa Thanadachakul; Warawan Wongboot; sirikanda wimol                                                                                                                                                                                                                                             |
| EPI_ISL_2877034                                                                                                                        | Regional Medical Sciences Center 8 Udonthani                                 | National Institute of Health, Department of Medical Sciences, Ministry of Public Health, Thailand                                                                                                                                                                                                                                                                                                                                                                                                                                                        | ; Natchaya Khiasang; Nuttida Thongpramul; Pakorn Piromtong; Pilailuk Okada; Ratana Tacharoenmuang; Siripaporn Phuygun; Sittiporn Parmmen; Sunthareeya Waicharoen; Thanutsapa Thanadachakul; Warawan Wongboot; sirikanda wimol                                                                                                                                                                                                                        |
| EPI_ISL_708806, EPI_ISL_708807                                                                                                         | Regional medical sciences center 6 chonburi                                  | National Institute of Health, Department of Medical Sciences, Ministry of Public Health, Thailand                                                                                                                                                                                                                                                                                                                                                                                                                                                        | Malinee Chittaganpitch; Pakorn Piromtong; Pilailuk Okada; Siripaporn Phuygun; Sittiporn Parmmen; Sunthareeya Waicharoen; Thanutsapa Thanadachakul; Warawan Wongboot                                                                                                                                                                                                                                                                                  |
| EPI_ISL_2544703, EPI_ISL_2544707                                                                                                       | Research Center for Emerging Viral Infections, Chang Gung University, Taiwan | Research Center for Emerging Viral Infections, Chang Gung University, Taiwan                                                                                                                                                                                                                                                                                                                                                                                                                                                                             | Carol Wang; Chung-Guei Huang; Hsiao-Chen Tu; Hui-Ying Weng; Hung-Yu Shu; Jason Su; Jora Lin; Kuo-Ming Lee; Po-Wei Huang; Pocky Lai; Shih-Feng Tsai; Shin-Li Shih; Shu-Li Yang; Tsu-Lan Wu; Yu-Nong Gong; Yung-Feng Lin                                                                                                                                                                                                                               |

|                                                                                                                                                                                                                                                                                                                                                                                      |                                                                                                     |                                                                                                                                                                                                                                                                                                                                                                                                                                                                  |                                                                     |                                                                                                                                                                                                                                                                                                                                                                                                                                                                                                                                                                                                                                                                                                                                                                                                                                                                                                                                                                                                                                                                                                                                                                                   |
|--------------------------------------------------------------------------------------------------------------------------------------------------------------------------------------------------------------------------------------------------------------------------------------------------------------------------------------------------------------------------------------|-----------------------------------------------------------------------------------------------------|------------------------------------------------------------------------------------------------------------------------------------------------------------------------------------------------------------------------------------------------------------------------------------------------------------------------------------------------------------------------------------------------------------------------------------------------------------------|---------------------------------------------------------------------|-----------------------------------------------------------------------------------------------------------------------------------------------------------------------------------------------------------------------------------------------------------------------------------------------------------------------------------------------------------------------------------------------------------------------------------------------------------------------------------------------------------------------------------------------------------------------------------------------------------------------------------------------------------------------------------------------------------------------------------------------------------------------------------------------------------------------------------------------------------------------------------------------------------------------------------------------------------------------------------------------------------------------------------------------------------------------------------------------------------------------------------------------------------------------------------|
| EPI_ISL_2544708,<br>EPI_ISL_2544710,<br>EPI_ISL_2544711,<br>EPI_ISL_2544713                                                                                                                                                                                                                                                                                                          |                                                                                                     |                                                                                                                                                                                                                                                                                                                                                                                                                                                                  |                                                                     |                                                                                                                                                                                                                                                                                                                                                                                                                                                                                                                                                                                                                                                                                                                                                                                                                                                                                                                                                                                                                                                                                                                                                                                   |
| EPI_ISL_2740439, EPI_ISL_2740490, EPI_ISL_2740549, EPI_ISL_2741203, EPI_ISL_2741308, EPI_ISL_2741766, EPI_ISL_2741814, EPI_ISL_2742068, EPI_ISL_2748953, EPI_ISL_2748955, EPI_ISL_2749048, EPI_ISL_2749111, EPI_ISL_2749225, EPI_ISL_2904339, EPI_ISL_2904411                                                                                                                        | see above                                                                                           | Respiratory Virus Unit, Microbiology Services Colindale, Public Health England                                                                                                                                                                                                                                                                                                                                                                                   | COVID-19 Genomics UK (COG-UK) Consortium                            | PHE Covid Sequencing Team                                                                                                                                                                                                                                                                                                                                                                                                                                                                                                                                                                                                                                                                                                                                                                                                                                                                                                                                                                                                                                                                                                                                                         |
| EPI_ISL_423103,<br>EPI_ISL_423104,<br>EPI_ISL_423207,<br>EPI_ISL_464172                                                                                                                                                                                                                                                                                                              | Respiratory Virus Unit, Microbiology Services Colindale, Public Health England                      | Respiratory Virus Unit, Microbiology Services Colindale, Public Health England                                                                                                                                                                                                                                                                                                                                                                                   |                                                                     | Angie Lackenby; Joanna Ellis; Jonathan Hubb; Kirstin Edwards; Leena Bhaw; Maria Zambon; Monica Galiano; Omolola Akinbami; PHE Covid Sequencing Team; Richard Myers; Shahjahan Miah; Steven Platt; Tiina Talts                                                                                                                                                                                                                                                                                                                                                                                                                                                                                                                                                                                                                                                                                                                                                                                                                                                                                                                                                                     |
| EPI_ISL_747100                                                                                                                                                                                                                                                                                                                                                                       | Respiratory Viruses Branch, Centers for Disease Control and Prevention                              | Respiratory Viruses Branch, Centers for Disease Control and Prevention                                                                                                                                                                                                                                                                                                                                                                                           |                                                                     | C.R.; Cook; Lee, J.; Li, Y.; Marine, R.; Montmayeur, A.; P.W.; Paden; Queen, K.; Sheth, M.; Tao, Y.; Tong, S.; Uehara, A.; Wang, H.                                                                                                                                                                                                                                                                                                                                                                                                                                                                                                                                                                                                                                                                                                                                                                                                                                                                                                                                                                                                                                               |
| EPI_ISL_2603892                                                                                                                                                                                                                                                                                                                                                                      | Rhode Island State Health Laboratory                                                                | Rhode Island State Health Laboratory                                                                                                                                                                                                                                                                                                                                                                                                                             |                                                                     | Ewa King; Kristin Carpenter-Azevedo; Richard C. Huard                                                                                                                                                                                                                                                                                                                                                                                                                                                                                                                                                                                                                                                                                                                                                                                                                                                                                                                                                                                                                                                                                                                             |
| EPI_ISL_2799553,<br>EPI_ISL_2800292                                                                                                                                                                                                                                                                                                                                                  | Riga East University Hospital, National Microbiology Reference Laboratory                           | Riga East University Hospital, National Microbiology Reference Laboratory; Eurofins Genomics Europe Sequencing GmbH                                                                                                                                                                                                                                                                                                                                              |                                                                     | Arzu Aigulieva; Diāna Dušacka; Dārta Pūpolā; Ilva Pole; Jevgenijs Bodrenko; Jūlija Čevere; Reinis Vangravs; Reinis Zeltmatis; Sergejs Nikišins; Ģirts Šķendērs                                                                                                                                                                                                                                                                                                                                                                                                                                                                                                                                                                                                                                                                                                                                                                                                                                                                                                                                                                                                                    |
| EPI_ISL_1239479                                                                                                                                                                                                                                                                                                                                                                      | Rob Ferreira Hospital, National Health Laboratory Services, Mpumalanga, South Africa                | National Institute for Communicable Diseases of the National Health Laboratory Service                                                                                                                                                                                                                                                                                                                                                                           |                                                                     | Amoako DG; Bhiman JN; Ismail A; Mahlangu B; Mohale T; Ntuli N; Scheepers C                                                                                                                                                                                                                                                                                                                                                                                                                                                                                                                                                                                                                                                                                                                                                                                                                                                                                                                                                                                                                                                                                                        |
| EPI_ISL_2447836,<br>EPI_ISL_2447870                                                                                                                                                                                                                                                                                                                                                  | Rob Ferreira Laboratory                                                                             | National Institute for Communicable Diseases of the National Health Laboratory Service                                                                                                                                                                                                                                                                                                                                                                           |                                                                     | Amoako DG; Bhiman JN; Ismail A; Mahlangu B; Mohale T; Ntuli N; Scheepers C                                                                                                                                                                                                                                                                                                                                                                                                                                                                                                                                                                                                                                                                                                                                                                                                                                                                                                                                                                                                                                                                                                        |
| EPI_ISL_419833,<br>EPI_ISL_419835                                                                                                                                                                                                                                                                                                                                                    | Royal Darwin Hospital                                                                               | Victorian Infectious Diseases Reference Laboratory and Microbiological Diagnostic Unit Public Health Laboratory, Doherty Institute                                                                                                                                                                                                                                                                                                                               |                                                                     | Caly L.; Druce J.; Meumann, E.; Sait, M.; Schultz M.; Seemann T.                                                                                                                                                                                                                                                                                                                                                                                                                                                                                                                                                                                                                                                                                                                                                                                                                                                                                                                                                                                                                                                                                                                  |
| EPI_ISL_521862, EPI_ISL_779406, EPI_ISL_779408, EPI_ISL_779409, EPI_ISL_779413, EPI_ISL_812423, EPI_ISL_2321158, EPI_ISL_2321160, EPI_ISL_2321161, EPI_ISL_2321163, EPI_ISL_2321166, EPI_ISL_2379269, EPI_ISL_2839562, EPI_ISL_2839563, EPI_ISL_2839567, EPI_ISL_2839568, EPI_ISL_2907544, EPI_ISL_2907545, EPI_ISL_2907546, EPI_ISL_3030412                                         | see above                                                                                           | Royal Darwin Hospital Pathology                                                                                                                                                                                                                                                                                                                                                                                                                                  | MDU-PHL                                                             | Caly L.; Druce J.; M.L.; Meumann, E.; N.L.; Sait; Sait, M.; Schultz M.; Seemann T.; Sherry; Sherry, N.                                                                                                                                                                                                                                                                                                                                                                                                                                                                                                                                                                                                                                                                                                                                                                                                                                                                                                                                                                                                                                                                            |
| EPI_ISL_2250194, EPI_ISL_2250196, EPI_ISL_2250198, EPI_ISL_2250204, EPI_ISL_2250206, EPI_ISL_2250209, EPI_ISL_2250214, EPI_ISL_2250216, EPI_ISL_2250217, EPI_ISL_2250219                                                                                                                                                                                                             | see above                                                                                           | Royal Darwin Hospital Pathology                                                                                                                                                                                                                                                                                                                                                                                                                                  | Microbiological Diagnostic Unit Public Health Laboratory (MDU-PHL)  | Caly L.; Druce J.; M.L.; Meumann, E.; N.L.; Sait; Seemann T.; Sherry                                                                                                                                                                                                                                                                                                                                                                                                                                                                                                                                                                                                                                                                                                                                                                                                                                                                                                                                                                                                                                                                                                              |
| EPI_ISL_426898                                                                                                                                                                                                                                                                                                                                                                       | Royal Darwin Hospital Pathology                                                                     | Microbiological Diagnostic Unit Public Health Laboratory and Victorian Infectious Diseases Reference Laboratory, Doherty Institute                                                                                                                                                                                                                                                                                                                               |                                                                     | Caly L.; Druce J.; Meumann, E.; Sait, M.; Schultz M.; Seemann T.; Sherry, N.                                                                                                                                                                                                                                                                                                                                                                                                                                                                                                                                                                                                                                                                                                                                                                                                                                                                                                                                                                                                                                                                                                      |
| EPI_ISL_430631                                                                                                                                                                                                                                                                                                                                                                       | Royal Darwin Hospital Pathology                                                                     | Microbiological Diagnostic Unit Public Health Laboratory and Victorian Infectious Diseases Reference Laboratory, The Peter Doherty Institute for Infection and Immunity                                                                                                                                                                                                                                                                                          |                                                                     | Caly L.; Druce J.; Meumann, E.; Sait, M.; Schultz M.; Seemann T.; Sherry, N.                                                                                                                                                                                                                                                                                                                                                                                                                                                                                                                                                                                                                                                                                                                                                                                                                                                                                                                                                                                                                                                                                                      |
| EPI_ISL_577607                                                                                                                                                                                                                                                                                                                                                                       | Royal Hobart Hospital                                                                               | Royal Hobart Hospital                                                                                                                                                                                                                                                                                                                                                                                                                                            |                                                                     | Cooley L.; van Haeften R.                                                                                                                                                                                                                                                                                                                                                                                                                                                                                                                                                                                                                                                                                                                                                                                                                                                                                                                                                                                                                                                                                                                                                         |
| EPI_ISL_522621,<br>EPI_ISL_522739,<br>EPI_ISL_522745                                                                                                                                                                                                                                                                                                                                 | Royal Hobart Hospital Microbiology Department                                                       | MDU-PHL                                                                                                                                                                                                                                                                                                                                                                                                                                                          |                                                                     | Cooley L.; M.B.; Sait M.; Schultz; Seemann T.; Sherry N.; van Haeften R.                                                                                                                                                                                                                                                                                                                                                                                                                                                                                                                                                                                                                                                                                                                                                                                                                                                                                                                                                                                                                                                                                                          |
| EPI_ISL_516806                                                                                                                                                                                                                                                                                                                                                                       | Rumah Sakit PKU Gamping                                                                             | Genetics Working Group (Pokja Genetik) Faculty of Medicine, Public Health and Nursing Universitas Gadjah Mada (FK-KMK UGM); Disease Investigation Center Wates Ministry of Agriculture Indonesia; Department of Microbiology FK-KMK UGM; Laboratorium Diagnostik Yayasan Tahija World Mosquito Program (WMP) Yogyakarta Center for Tropical Medicine FK-KMK UGM; Integrated Research center FK-KMK UGM; Department of Computer Science and Electronics FMIPA UGM |                                                                     | . Afiahayati ; Marcellus ; Siswanto; Ardorisye Saptaty Forna; Dwi AA Nugrahaningsih; Edwin W. Daniwijaya; Eggi Arguni; Endah Supriyati; Gunadi; Hendra Wibawa; Kerala Athollah; Ludhang P. Rizki; Mohamad S. Hakim; Titik Nuryastuti; Tri Wibawa                                                                                                                                                                                                                                                                                                                                                                                                                                                                                                                                                                                                                                                                                                                                                                                                                                                                                                                                  |
| EPI_ISL_735445                                                                                                                                                                                                                                                                                                                                                                       | Rwanda National Reference Laboratory                                                                | GIGA Medical Genomics                                                                                                                                                                                                                                                                                                                                                                                                                                            |                                                                     | Bouchra Boujemla; Esperence Umumararungu; Jacob Soupgui; Keith Durkin; Léon Mutesa; Maria Artesi; Marie-Pierre Hayette; Patrick Tuyisenge; Robert Rutayisire; Sabin Nsanzimana; Swaibu Gatare; Sébastien Bontems; Vincent Bours; Yvan Butera                                                                                                                                                                                                                                                                                                                                                                                                                                                                                                                                                                                                                                                                                                                                                                                                                                                                                                                                      |
| EPI_ISL_1063900,<br>EPI_ISL_1064168                                                                                                                                                                                                                                                                                                                                                  | Rwanda National Reference Laboratory                                                                | Rwanda National Reference Laboratory                                                                                                                                                                                                                                                                                                                                                                                                                             |                                                                     | Enatha Mukantwari; Umuringa Jeanne d'Arc                                                                                                                                                                                                                                                                                                                                                                                                                                                                                                                                                                                                                                                                                                                                                                                                                                                                                                                                                                                                                                                                                                                                          |
| EPI_ISL_451127, EPI_ISL_451144, EPI_ISL_467989, EPI_ISL_468024, EPI_ISL_468039, EPI_ISL_508138, EPI_ISL_510544, EPI_ISL_513911, EPI_ISL_603124, EPI_ISL_603127, EPI_ISL_654795, EPI_ISL_654800, EPI_ISL_755568, EPI_ISL_812358, EPI_ISL_1704675, EPI_ISL_1704796, EPI_ISL_1704798, EPI_ISL_1704799, EPI_ISL_1704804, EPI_ISL_1706366, EPI_ISL_1706367                                | see above                                                                                           | SA Pathology                                                                                                                                                                                                                                                                                                                                                                                                                                                     | SA Pathology                                                        | Chuan Kok Lim; Geoff Higgins; Ivan Bastian; Julien Soubrier; Karin Kassahn; Lex Leong; Mark Turra; Song Gao                                                                                                                                                                                                                                                                                                                                                                                                                                                                                                                                                                                                                                                                                                                                                                                                                                                                                                                                                                                                                                                                       |
| EPI_ISL_1603794                                                                                                                                                                                                                                                                                                                                                                      | SARS-CoV-2 Sequencing Castilla y Leon-Spain Consortium                                              | SARS-CoV-2 Sequencing Castilla y Leon-Spain Consortium                                                                                                                                                                                                                                                                                                                                                                                                           |                                                                     | Antonio Orduña-Domingo; Carlos Fuster Foz; Carmen Aldea-Mansilla; Carmen Gimeno Crespo; David Abad; Gregoria Megias Lobón; Jose María Eiros Bouza; Laura Sánchez de Prada; M. Isabel Fernandez-Natal; Marta Dominguez-Gil; Marta Hernandez; María Antonia García Castro; M <sup>a</sup> Fe Brezmes-Valdivieso; Noelia Arenal Andrés; Silvia Rojo; Sonsoles Garcinuño Pérez                                                                                                                                                                                                                                                                                                                                                                                                                                                                                                                                                                                                                                                                                                                                                                                                        |
| EPI_ISL_1046778, EPI_ISL_1198812, EPI_ISL_1927132, EPI_ISL_1927133, EPI_ISL_1927135, EPI_ISL_1927136, EPI_ISL_1927138, EPI_ISL_1927139, EPI_ISL_1927308, EPI_ISL_1927364, EPI_ISL_1927368, EPI_ISL_1927381, EPI_ISL_1927389, EPI_ISL_1927397, EPI_ISL_1927435, EPI_ISL_1927441, EPI_ISL_2131776, EPI_ISL_2131792, EPI_ISL_2447620, EPI_ISL_2447623, EPI_ISL_2447628, EPI_ISL_2447634 | see above                                                                                           | SARS-CoV-2 testing team, National Institute of Infectious Diseases                                                                                                                                                                                                                                                                                                                                                                                               | Pathogen Genomics Center, National Institute of Infectious Diseases | Chang-Kweng Lim; Eri Nakayama; Hazuka Y Furihata; Hidemasa Izumiya; Hiromizu Takahashi; Ken Miyazawa; Ken Shimuta; Ken-ichi Lee; Kentaro Itokawa; Koichi Ishikawa; Makoto Kuroda; Masanori Hashino; Masatomo Morita; Masumichi Saito; Minoru Nagi; Naomi Nojiri; Nobuo Koizumi; Nozomu Hanaoka; Rina Tanaka; Sana Uchikoba; Sayuri Seki; Shigeru Kusagawa; Shigeru Tajima; Shouji Yamamoto; Sunao Iyoda; Takashi Sakudo; Tsugoto Fujimoto; Tsuyoshi Sekizuka                                                                                                                                                                                                                                                                                                                                                                                                                                                                                                                                                                                                                                                                                                                      |
| EPI_ISL_2324433,<br>EPI_ISL_2567592,<br>EPI_ISL_2828393                                                                                                                                                                                                                                                                                                                              | SC (UCO) Igiene e Sanità Pubblica, ASUGI, Trieste                                                   | ARGO Laboratorio Genomica ed Epigenomica                                                                                                                                                                                                                                                                                                                                                                                                                         |                                                                     | Barbone F; Braida C; Breda C; Busetti M; D'Agaro P; Dal Monego S; Degasperri M; Fontana F; Licastro D; Marcello A; Pisciarnz E; Segat L                                                                                                                                                                                                                                                                                                                                                                                                                                                                                                                                                                                                                                                                                                                                                                                                                                                                                                                                                                                                                                           |
| EPI_ISL_2828450                                                                                                                                                                                                                                                                                                                                                                      | SC (UCO) Igiene e Sanità Pubblica, ASUGI, Trieste and SC Microbiologia e Virologia, ASFO, Pordenone | ARGO Laboratorio Genomica ed Epigenomica                                                                                                                                                                                                                                                                                                                                                                                                                         |                                                                     | Barbone F; Breda C; D'Agaro P; Dal Monego S; De Rosa R; Degasperri M; Licastro D; Marcello A; Segat L                                                                                                                                                                                                                                                                                                                                                                                                                                                                                                                                                                                                                                                                                                                                                                                                                                                                                                                                                                                                                                                                             |
| EPI_ISL_424841                                                                                                                                                                                                                                                                                                                                                                       | SC Dept of Health and Env. Control-Bureau of Laboratories                                           | Pathogen Discovery, Respiratory Viruses Branch, Division of Viral Diseases, Centers for Disease Control and Prevention                                                                                                                                                                                                                                                                                                                                           |                                                                     | Alison S. Lauffer Halpin; Anna Uehara; Christopher A. Elkins; Clinton R. Paden; Halbin Wang; Jing Zhang; Krista Queen; Mary S. Keckler; Rachel Marine; Suxiang Tong; Yan Li; Ying Tao                                                                                                                                                                                                                                                                                                                                                                                                                                                                                                                                                                                                                                                                                                                                                                                                                                                                                                                                                                                             |
| EPI_ISL_2482956                                                                                                                                                                                                                                                                                                                                                                      | SCM B12                                                                                             | CNR Virus des Infections Respiratoires - France SUD                                                                                                                                                                                                                                                                                                                                                                                                              |                                                                     | Antonin Bal; Bruno Lina; Bruno Simon; Gregory Destras; Gwendolyne Burfin; Hadrien Regue; Laurence Josset; Martine Valette; Quentin Semanas                                                                                                                                                                                                                                                                                                                                                                                                                                                                                                                                                                                                                                                                                                                                                                                                                                                                                                                                                                                                                                        |
| EPI_ISL_2018218                                                                                                                                                                                                                                                                                                                                                                      | SD Public Health Laboratory                                                                         | Centers for Disease Control and Prevention Division of Viral Diseases, Pathogen Discovery                                                                                                                                                                                                                                                                                                                                                                        |                                                                     | Alison Lauffer Halpin; Ben L. Rambo-Martin; Clinton R. Paden; Dakota Howard; Darlene Wagner; Dave Wentworth; Dhvani Batra; Jasmine Padilla; Justin Lee; Katie Dillon; Krista Queen; Kristen Knipe; Kristine Lacey; Mark Burroughs; Matthew Scherer; Mili Sheth; Peter Cook; Sam Shepard; Sarah Nobles; Shoshona Le; Suxiang Tong; Vivien Dugan; Yvette Unoarumhi                                                                                                                                                                                                                                                                                                                                                                                                                                                                                                                                                                                                                                                                                                                                                                                                                  |
| EPI_ISL_2934571,<br>EPI_ISL_2966511                                                                                                                                                                                                                                                                                                                                                  | SE Kyiv CDC MHU                                                                                     | The Institute of Molecular Biology and Genetics of NASU                                                                                                                                                                                                                                                                                                                                                                                                          |                                                                     | M.Tukalo et al.                                                                                                                                                                                                                                                                                                                                                                                                                                                                                                                                                                                                                                                                                                                                                                                                                                                                                                                                                                                                                                                                                                                                                                   |
| EPI_ISL_1732275                                                                                                                                                                                                                                                                                                                                                                      | SECAO CENTRO DE DIAGNOSTICO SECEDI                                                                  | Instituto Butantan / Mendelics                                                                                                                                                                                                                                                                                                                                                                                                                                   |                                                                     | Antonio Jorge Martins; Bianca Cechetto Carlos. Mendelics; Bibiana Santos; Claudia Renata dos Santos Barros; David Schlesinger. Hemocentro Ribeirão Preto; Simone Kashima; Debora Botequiu Moretti. Centro de Genômica Funcional da ESALQ; Luiz Lehmann Coutinho; Dimas Tadeu Covas; Elaine Cristina Marquize; Elaine Vieira dos Santos; Elisangela Chicaroni Mattos; Erika Freitas; Evandra Strazza Rodrigues; Felipe Allan da Silva da Costa; Flavia Aburjaile; Guilherme Targino Valente; Heidge Fukumasu. USP- Botucatu; Rejane Maria Tommasini Grotto; Instituto Butantan; Alexander Roberto Precioso; Jayme A. Souza-Neto; Jessica Cristina Chagas Lesbon; José Salvatore Leister Patané; João Paulo Kitajima; Luiz Carlos Junior de Alcantara; Maria Carolina Elias; Marta Giovanetti; Patricia Akemi Assato; Rafael dos Santos Bezerra; Raquel de Lello Rocha Campos Cassano. NGS Soluções Genômicas; Pilar Drummond Sampaio Corrêa Mariani. FZEA-USP Pirassununga; Mirele Daiana Poletti; Raul Machado Neto; Ricardo Augusto Brassalotti; Ricardo Haddad; Rodrigo Tocantins Calado.; Sandra Coccuzzo Sampaio; Svetoslav Nanev Slavov; Vagner Fonseca; Vincent Louis Viala |
| EPI_ISL_2934570,<br>EPI_ISL_2934573,<br>EPI_ISL_2934574,<br>EPI_ISL_2966512                                                                                                                                                                                                                                                                                                          | SECP MHU                                                                                            | The Institute of Molecular Biology and Genetics of NASU                                                                                                                                                                                                                                                                                                                                                                                                          |                                                                     | M.Tukalo et al.                                                                                                                                                                                                                                                                                                                                                                                                                                                                                                                                                                                                                                                                                                                                                                                                                                                                                                                                                                                                                                                                                                                                                                   |
| EPI_ISL_2938096                                                                                                                                                                                                                                                                                                                                                                      | SECRETARIA MUNICIPAL DA SAUDE DE GUARATINGUETA LABORATORIO 01                                       | Instituto Butantan                                                                                                                                                                                                                                                                                                                                                                                                                                               |                                                                     | Antonio Jorge Martins; Claudia Renata dos Santos Barros; David Schlesinger; Debora Botequiu Moretti; Dimas Tadeu Covas; Elaine Cristina Marquize; Elaine Vieira Santos; Evandra Strazza Rodrigues; Heidge Fukumasu; Jayme Augusto de Souza-Neto; José Salvatore Leister Patané; Luiz Alcantara; Luiz Lehmann Coutinho; Maria Carolina Elias; Maurício Lacerda Nogueira; Rafael dos Santos Bezerra; Raul Machado Neto; Rejane Maria Tommasini Grotto; Ricardo Haddad; Sandra Coccuzzo Sampaio Vessoni; Simone Kashima; Svetoslav Nanev Slavov; Vincent Louis Viala                                                                                                                                                                                                                                                                                                                                                                                                                                                                                                                                                                                                                 |
| EPI_ISL_2878465                                                                                                                                                                                                                                                                                                                                                                      | SELAS MEDILYS                                                                                       | Department of Virology, Henri Mondor University Hospital, Assistance Publique Hôpitaux de Paris, Université Paris-Est Créteil, INSERM U955                                                                                                                                                                                                                                                                                                                       |                                                                     | Alexandre Soulier; Christophe Rodriguez; Elisabeth Trawinski; Guillaume Gricourt; Jean-Michel Pawlowsky; Melissa N'Debi; Slim Fourati; Vanessa Demontant                                                                                                                                                                                                                                                                                                                                                                                                                                                                                                                                                                                                                                                                                                                                                                                                                                                                                                                                                                                                                          |
| EPI_ISL_2895385,<br>EPI_ISL_2895396,<br>EPI_ISL_2895404,<br>EPI_ISL_2895415                                                                                                                                                                                                                                                                                                          | SESARAM                                                                                             | Instituto Nacional de Saude (INSA)                                                                                                                                                                                                                                                                                                                                                                                                                               |                                                                     | Borges et al                                                                                                                                                                                                                                                                                                                                                                                                                                                                                                                                                                                                                                                                                                                                                                                                                                                                                                                                                                                                                                                                                                                                                                      |
| EPI_ISL_2600810                                                                                                                                                                                                                                                                                                                                                                      | SIESP CHIETI - DRIVE IN LANCIANO                                                                    | Istituto Zooprofilattico Sperimentale dell'Abruzzo e Molise "G. Caporale"                                                                                                                                                                                                                                                                                                                                                                                        |                                                                     | Ancora M; Calistri P; Cammà C; Caporale M; Curini V; Delli Compagni E; Di Domenico M; Di Lollo Valeria; Di Pasquale A; Lorusso A; Mangone I; Marccaci M; Puglia I; Rinaldi A; Savini G; Scialabba S                                                                                                                                                                                                                                                                                                                                                                                                                                                                                                                                                                                                                                                                                                                                                                                                                                                                                                                                                                               |
| EPI_ISL_2483577                                                                                                                                                                                                                                                                                                                                                                      | SIESP DIPARTIMENTO DI PREVENZIONE TERAMO                                                            | Istituto Zooprofilattico Sperimentale dell'Abruzzo e Molise "G.                                                                                                                                                                                                                                                                                                                                                                                                  |                                                                     | Ancora M; Calistri P; Cammà C; Caporale M; Curini V; Delli Compagni E; Di Domenico M; Di Lollo Valeria; Di Pasquale A; Lorusso A; Mangone I; Marccaci M; Puglia I; Rinaldi A; Savini G; Scialabba S                                                                                                                                                                                                                                                                                                                                                                                                                                                                                                                                                                                                                                                                                                                                                                                                                                                                                                                                                                               |



|                                                                                                                                                                                                                                                                                                                                                                                                                                                          |                                       |                                                                                                            |                                                                                                                                                                                                                          |
|----------------------------------------------------------------------------------------------------------------------------------------------------------------------------------------------------------------------------------------------------------------------------------------------------------------------------------------------------------------------------------------------------------------------------------------------------------|---------------------------------------|------------------------------------------------------------------------------------------------------------|--------------------------------------------------------------------------------------------------------------------------------------------------------------------------------------------------------------------------|
| EPI_ISL_2006881,<br>EPI_ISL_2006899,<br>EPI_ISL_2427243,<br>EPI_ISL_2675217,<br>EPI_ISL_3047978                                                                                                                                                                                                                                                                                                                                                          | South Dakota Public Health Laboratory | South Dakota Public Health Laboratory                                                                      | Chris Carlson; Jacob Garfin and Chris Carlson                                                                                                                                                                            |
| EPI_ISL_513377, EPI_ISL_593699, EPI_ISL_593726, EPI_ISL_629030, EPI_ISL_740868, EPI_ISL_768602, EPI_ISL_1904462, EPI_ISL_1904464, EPI_ISL_2462416, EPI_ISL_2462422, EPI_ISL_2650459, EPI_ISL_2650461                                                                                                                                                                                                                                                     | see above                             | South Eastern Area Laboratory Services (SEALS)                                                             | CIDM-PH et al.                                                                                                                                                                                                           |
| EPI_ISL_2928014, EPI_ISL_2928016, EPI_ISL_2928017, EPI_ISL_2928018, EPI_ISL_2928019, EPI_ISL_2928020, EPI_ISL_2928021, EPI_ISL_2928023, EPI_ISL_2928025, EPI_ISL_2928026, EPI_ISL_2928027                                                                                                                                                                                                                                                                | see above                             | South Sudan Ministry of Health, WHO South Sudan, MRC/UVRI & LSHTM Uganda Research Unit                     | Abe G. Abias; Dan Lule Bugembe; Dennis Kenyi Lodiongo; James Ayei; John Rumunu; Joseph Francis Wamala; Juma John HM; Lu Lujok Deng; Matthew Cotten; My V.T. Phan; Pontiano Kaleebu; Richard Lino Loro Lako; Sudhir Bunga |
| EPI_ISL_456232,<br>EPI_ISL_456238,<br>EPI_ISL_456297,<br>EPI_ISL_579133                                                                                                                                                                                                                                                                                                                                                                                  | see above                             | Southern Community Labs Dunedin                                                                            | Institute of Environmental Science and Research (ESR)                                                                                                                                                                    |
| EPI_ISL_849739,<br>EPI_ISL_849743                                                                                                                                                                                                                                                                                                                                                                                                                        | see above                             | Special Operations Medical Research Division, Defence Services Medical Research Centre                     | Special Operations Medical Research Division, Defence Services Medical Research Centre                                                                                                                                   |
| EPI_ISL_513399                                                                                                                                                                                                                                                                                                                                                                                                                                           | see above                             | St Vincent's Pathology (SydPath)                                                                           | NSW Health Pathology - Institute of Clinical Pathology and Medical Research; Westmead Hospital; University of Sydney                                                                                                     |
| EPI_ISL_596672                                                                                                                                                                                                                                                                                                                                                                                                                                           | see above                             | St.Vincent's University Hospital                                                                           | St.Vincent's University Hospital                                                                                                                                                                                         |
| EPI_ISL_1495136                                                                                                                                                                                                                                                                                                                                                                                                                                          | see above                             | State Institution «Public Health Center of Ministry of Health of Ukraine»                                  | Robert Koch Institute, ZBS1 Highly Pathogenic Viruses, Berlin, Germany                                                                                                                                                   |
| EPI_ISL_2779638,<br>EPI_ISL_2779639                                                                                                                                                                                                                                                                                                                                                                                                                      | see above                             | State Key Laboratory of Emerging Infectious Diseases, The University of Hong Kong                          | The University of Hong Kong                                                                                                                                                                                              |
| EPI_ISL_2662727                                                                                                                                                                                                                                                                                                                                                                                                                                          | see above                             | State Key Laboratory of Pathogen and Biosecurity, Beijing Institute of Microbiology and Epidemiology       | State Key Laboratory of Pathogen and Biosecurity, Beijing Institute of Microbiology and Epidemiology                                                                                                                     |
| EPI_ISL_752613, EPI_ISL_753087, EPI_ISL_753170, EPI_ISL_1771478, EPI_ISL_2007889, EPI_ISL_2724554, EPI_ISL_2724734, EPI_ISL_3033249                                                                                                                                                                                                                                                                                                                      | see above                             | State Laboratories Division, Hawaii State Department of Health                                             | State Laboratories Division, Hawaii State Department of Health                                                                                                                                                           |
| EPI_ISL_2378030, EPI_ISL_2378031, EPI_ISL_2378033, EPI_ISL_2378143, EPI_ISL_2378146, EPI_ISL_2378147, EPI_ISL_2800610                                                                                                                                                                                                                                                                                                                                    | see above                             | State Testing Facility                                                                                     | Altius Institute for Biomedical Research                                                                                                                                                                                 |
| EPI_ISL_2685046                                                                                                                                                                                                                                                                                                                                                                                                                                          | see above                             | Statens Serum Institut Bioinformatics and Microbial Genomics                                               | Statens Serum Institut Bioinformatics and Microbial Genomics                                                                                                                                                             |
| EPI_ISL_2375915                                                                                                                                                                                                                                                                                                                                                                                                                                          | see above                             | Steinkopf PHC Clinic                                                                                       | NHLS/UJCT                                                                                                                                                                                                                |
| EPI_ISL_640079,<br>EPI_ISL_2375919                                                                                                                                                                                                                                                                                                                                                                                                                       | see above                             | Stellenbosch Hospital wc STB                                                                               | NHLS/UJCT                                                                                                                                                                                                                |
| EPI_ISL_2921612                                                                                                                                                                                                                                                                                                                                                                                                                                          | see above                             | Sultan Haji Ahmad Shah Hospital                                                                            | Institute for Medical Research, Infectious Disease Research Centre, National Institutes of Health, Ministry of Health Malaysia                                                                                           |
| EPI_ISL_2931923                                                                                                                                                                                                                                                                                                                                                                                                                                          | see above                             | Sultanah Fatimah Specialist Hospital, Muar                                                                 | Institute for Medical Research, Infectious Disease Research Centre, National Institutes of Health, Ministry of Health Malaysia                                                                                           |
| EPI_ISL_2811879                                                                                                                                                                                                                                                                                                                                                                                                                                          | see above                             | Sultanah Nora Ismail Hospital, Batu Pahat                                                                  | Institute for Medical Research, Infectious Disease Research Centre, National Institutes of Health, Ministry of Health Malaysia                                                                                           |
| EPI_ISL_450747                                                                                                                                                                                                                                                                                                                                                                                                                                           | see above                             | Sunnybrook Health Sciences Centre                                                                          | Department of Laboratory Medicine and Molecular Diagnostics, Sunnybrook Health Sciences Centre                                                                                                                           |
| EPI_ISL_2406466                                                                                                                                                                                                                                                                                                                                                                                                                                          | see above                             | Svay Rieng Rapid Response Team                                                                             | Virology Unit, Institut Pasteur du Cambodge                                                                                                                                                                              |
| EPI_ISL_1193078, EPI_ISL_1617530, EPI_ISL_1618454, EPI_ISL_1676225, EPI_ISL_1807444, EPI_ISL_1898458, EPI_ISL_1899265, EPI_ISL_1899290, EPI_ISL_1900277, EPI_ISL_2033384, EPI_ISL_2033792, EPI_ISL_2099115, EPI_ISL_2278930, EPI_ISL_2410253, EPI_ISL_2414900, EPI_ISL_2415990, EPI_ISL_2417386, EPI_ISL_2419171, EPI_ISL_2420110, EPI_ISL_2613350, EPI_ISL_2792809, EPI_ISL_2792949, EPI_ISL_2793678, EPI_ISL_2794645, EPI_ISL_2889039, EPI_ISL_2980627 | see above                             | Swedish national genomic surveillance program of SARS-CoV-2                                                | The Public Health Agency of Sweden                                                                                                                                                                                       |
| EPI_ISL_860745                                                                                                                                                                                                                                                                                                                                                                                                                                           | see above                             | Swiss National Reference Centre for Influenza                                                              | Swiss National Reference Centre for Influenza                                                                                                                                                                            |
| EPI_ISL_478718                                                                                                                                                                                                                                                                                                                                                                                                                                           | see above                             | Sydney South West Pathology Service (SSWPS) - Concord Repatriation General Hospital - NSW Health Pathology | NSW Health Pathology - Institute of Clinical Pathology and Medical Research; Westmead Hospital; University of Sydney                                                                                                     |
| EPI_ISL_2811986,<br>EPI_ISL_2812836,<br>EPI_ISL_2812857                                                                                                                                                                                                                                                                                                                                                                                                  | see above                             | Sydney South West Pathology Service (SSWPS) - Liverpool Hospital - NSW Health Pathology                    | NSW Health Pathology - Institute of Clinical Pathology and Medical Research; Westmead Hospital; University of Sydney                                                                                                     |
| EPI_ISL_767863,<br>EPI_ISL_803111,<br>EPI_ISL_2462428                                                                                                                                                                                                                                                                                                                                                                                                    | see above                             | Sydney South West Pathology Service (SSWPS) - Royal Prince Alfred Hospital - NSW Health Pathology          | NSW Health Pathology - Institute of Clinical Pathology and Medical Research; Westmead Hospital; University of Sydney                                                                                                     |
| EPI_ISL_1319275, EPI_ISL_2107235, EPI_ISL_2107284, EPI_ISL_2546950, EPI_ISL_2547057, EPI_ISL_2788795, EPI_ISL_2788800, EPI_ISL_2788837                                                                                                                                                                                                                                                                                                                   | see above                             | Synlab Eesti OÜ                                                                                            | 1. Laboratory of Communicable Diseases (Estonia); 2. Eurofins Genomics Europe Sequencing GmbH                                                                                                                            |
| EPI_ISL_1655749,<br>EPI_ISL_1655750,<br>EPI_ISL_1656735                                                                                                                                                                                                                                                                                                                                                                                                  | see above                             | Synlab Haut de France                                                                                      | UMR 8199/1283 EGD                                                                                                                                                                                                        |
| EPI_ISL_2897132                                                                                                                                                                                                                                                                                                                                                                                                                                          | see above                             | Szpital Uniwersytecki w Krakowie                                                                           | 1. Tricity SARS-CoV-2 sequencing consortium: University of Gdansk, Medical University of Gdansk, Vaxican Ltd., Invicta Ltd. 2. National Institute of Public Health - National Institute of Hygiene, Warsaw, Poland       |
| EPI_ISL_2694620,<br>EPI_ISL_2694702,<br>EPI_ISL_2695504,<br>EPI_ISL_2695517                                                                                                                                                                                                                                                                                                                                                                              | see above                             | TAMBO MEMORIAL                                                                                             | National Institute for Communicable Diseases of the National Health Laboratory Service                                                                                                                                   |
| EPI_ISL_2662568, EPI_ISL_2662572, EPI_ISL_2662574, EPI_ISL_2709951, EPI_ISL_2709967, EPI_ISL_2709989, EPI_ISL_2827057, EPI_ISL_3024631                                                                                                                                                                                                                                                                                                                   | see above                             | TAMBO MEMORIAL LABORATORY                                                                                  | National Institute for Communicable Diseases of the National Health Laboratory Service                                                                                                                                   |
| EPI_ISL_914824                                                                                                                                                                                                                                                                                                                                                                                                                                           | see above                             | TAMIZAJE COMUNITARIO - PASO CANOAS                                                                         | Incienza, Instituto Costarricense de Investigación y Enseñanza en Nutrición y Salud                                                                                                                                      |
| EPI_ISL_1530791                                                                                                                                                                                                                                                                                                                                                                                                                                          | see above                             | TGen North                                                                                                 | TGen North                                                                                                                                                                                                               |
| EPI_ISL_426629, EPI_ISL_436105, EPI_ISL_447252, EPI_ISL_447593, EPI_ISL_457726, EPI_ISL_2693000, EPI_ISL_2693004, EPI_ISL_2693006                                                                                                                                                                                                                                                                                                                        | see above                             | TSGH-CP molecular lab                                                                                      | TSGH-CP molecular lab                                                                                                                                                                                                    |
| EPI_ISL_2987237, EPI_ISL_2987242, EPI_ISL_2987249, EPI_ISL_2987322, EPI_ISL_2987328, EPI_ISL_2987337, EPI_ISL_2987343, EPI_ISL_2987344                                                                                                                                                                                                                                                                                                                   | see above                             | TSHEPONG LABORATORY                                                                                        | National Institute for Communicable Diseases of the National Health Laboratory Service                                                                                                                                   |
| EPI_ISL_2827906, EPI_ISL_2827908, EPI_ISL_2827911, EPI_ISL_2984879, EPI_ISL_2984882, EPI_ISL_2984913, EPI_ISL_2984921, EPI_ISL_2984926, EPI_ISL_2984930, EPI_ISL_2984938                                                                                                                                                                                                                                                                                 | see above                             | TSHEPONG LABORATORY                                                                                        | National Institute for Communicable Diseases of the National Health Laboratory Service                                                                                                                                   |
| EPI_ISL_2506492,                                                                                                                                                                                                                                                                                                                                                                                                                                         | see above                             | TYKS, Kliininen mikrobiologia                                                                              | Expert Microbiology, National Institute for Health and Welfare                                                                                                                                                           |
|                                                                                                                                                                                                                                                                                                                                                                                                                                                          |                                       |                                                                                                            | Carita Savolainen-Kopra; Erika Lindh; Haider al-Hello; Jani Halkilähti; Kirsi Liitsola; Niina Ikonen; Olli Vapalahti; Pekka Ellonen; Phuoc Truong; Päivi Laurila; Ravi Kant; Sari Hannula; Siome Blomqvist; Teemu Smura  |



Galvão Caroline de Jesus Coelho Donha Caroline Guisantes de Salvo Toni Caryna Eurich Mazur Catusiue Cabreira da Silva Tortorella Celso F. D. Doliveira Cesar Luiz Boguszewski Christiane Pienna Soares Chung Man Chin Claudia Moro Cleverson Busso Cristiane Cominetti Daiane Priscilla Simão-Silva Dalila Luciola Zanette Daniel de Paula Daniel de Paula Daniel Rech Daniela Fiori Gradia Daniela Pretti da Cunha Tirapelli Daniela Viganò Zanoni Jeronimo Donato Ukan Daniela Malheiros Ferreira Danielle Venturini Deborah Catharine de Assis Leite Deivid Calebe de Souza Dennis Armando Bertolini Edenir Inez Pamero Edna Maria Vissio Reichle Eduardo Roberto Arini Miquel Eduard José de Almeida Araújo Eliana Carolina Vanessa Despero Elandro Reis Tavares Elza Kimura Grimshaw Emanuel Maltempi de Souza Emanuele Cristina Gustani Buss Emerson Carraro Emília Cristina Melo ENILZE Maria de Souza Fonseca Ribeiro Enilze Maria de Souza Fonseca Ribeiro Erika Izumi Erika Seki Kioshima Cotica Evani Marques Pereira Fabio Negretti Fábio Rodrigues Ferreira Seiva Felipe Dunin dos Santos Felipe Tuon Fernanda Andreia Rosa Fernanda Carolina Prado Cortez Fernanda Ivaniski Fernando Maria Peria Flavia Regina Oliveira de Barros Franciele Ani Caovilla Follador Franciele Mara Luiza Zanardo Bohm Francinete Ramos Campos Fulviana Silva Nishiyama GABRIEL RIBEIRO CORDEIRO Gabriela Datsch Benemario Gisele Santos de Oliveira Glaucio Valdameri Glaucio Akelington Freire Vitelio Glaucio Vieira Miranda Glauco Scantamburlo ALVES Fernandes Guilherme Ferreira Silveira Gustavo Bianchini Porfirio Gustavo Marques Hélio Volpato Hildebrando Messinno Nagai Huel Diana Lee Ice Mara de Syllos Cólus Iris Rabinovich Israel Gomy Jackson Kawakami Jacques Duillo Brancher Jaime Luis Lopes Rocha Jaqueline Carvalho de Oliveira Jean Henrique da Silva Rodrigues Jean Leandro dos Santos Joane Eliete Lagulla Visentainer João Paulo Bianchi Ximenez Joaquim Manoel da Silva Jociani Ascani Joel Donazzolo Jorge Luis Maria Ruiz Jose Knopholz José Luis da Conceição Silva José Sebastião dos Santos Joseane Carla Schabarum Juliana Maria Serpeloni Juliana Maria Morini Küpper Cardoso Persequini Karen Brajão de Oliveira Karin Braun Prado Karine de Oliveira Katiany Rizzelli Caleffi Ferracioli Katiussia de Oliveira Francisco Gabriel Kelvinson Fernandes Viana Larissa Beatriz Cassalder Bahis Pinto Laurivaldo Unio Vilas Boas Léia Carolina Lucio Libero Mezzaduro Neto Ligia Carla Faccin Galhardi Lirane Elize Defante Ferreto Luciana Furlaneto Maia Luciana Oliveira de Fariña Luciana Reis Azevedo Alanis Luciane Regina Cavalli Lucy Megumi Yamauchi Lioni Luis Paulo Gomes Mascarenhas Luis Paulo Gomes Mascarenhas Luis Paulo Mascarenhas Lupe Furtado Alle Lyvia Regina Biagi Silva Bertachi Mara Antonia Ramos Costa Mara L. Cordeiro Marcela Maria Birolim Marcelo Ricardo Virgilio Lopes Consolador Marcia Holsbach Bratema Marcia Regina Eches Perugini Marcos Abner Marcos Pileggi FRANCESCO TADEU GRZELCZAK Marcus Peikrizwili Tartaruga Maria Angelica Ehara Watanabe Maria Antonia Ramos Costa Maria Claudia Grossa Maria José Soares Mendes Giannini Maria Leandra Terencio Maria Lúcia Bonfleur Maria Luiza X Guimarães de Oliveira Maria Luiza Petzl-Erler Mariana Abe Vicente Cavagnari Marina Kimiko Kadowaki Marise Fonseca dos Santos Marla Karine Amarante Maurício Turkiewicz Mauro Antonio Alves Castro Michel Rodrigo Zambrano Passarini Michele Potrich Michelle Orane Schemberr Milena Massumi Kozonoe Mônica Degraf Cavallin Monica Tereza Suldofski Mucio Luiz de Assis Cirino Nadia Graciele Krohn Najeh Masmari Khaill Nédia de Castilhos Gêisi Neide Tomimura Costa Neiva Leite Neyva Maria Lopes Romeiro Patrícia Amância da Rosa Patrícia Dayane Carvalho Schaker Patricia Oehlmeiyer Nassar Patrícia Savio de Araújo-Souza Patricia Silva Lucio Paulo Henrique Couto Souza Paulo Roberto Donadio Perçu Nohama Quirino Alves de Lima Neto Rafael Deminice Rafael dos Santos Raquel Alves dos Santos Renan Manoazo Galante Renata Emiland Freitas de Macedo Rita de Cássia Garcia Simão Rebelo Losi Guembarovski Roberto H. Heral Roberto Rosati Rodrigo Ferreira Rodrigo Ferreira Mattiello Rogério Neri Shinsato Roséane Aparecida Ribeiro Rosilene Fressatti Cardoso Rosilene Fressatti Cardoso Sandra Mara Guse Scós Venske Selene Elifrio Esposito Sérgio Ossamu Ioshii Silvana Giulianti Silvia Mara de Souza Halick Silvio Henrique Maia de Almeida Simone Neumann Wendt Spencer Luiz Marques Payão Stefan Wolanski Negráo Stephane Jainaina de Moura Escobar Sueli Fumie Yamada Ogatta SUELI PERCIO QUINIA Taciane Finatto Yanaumi Veiga Iniyoda Tayza Katinelle Daniello Ostroski Tony Alexander Hild Valeria Valente Vanessa Nascimento Kozak Vanessa Santos Sotomaior Victor Breno Pedrosa Victoria Zeghibi Cochenski Borba Vivian Rotuno Moure Valdameri Wander Rogério Pavanelli Weber Cláudio Francisco Nunes da Silva Willian Augusto de Melo Yohandra Reyes Torres

|                                                                                                                                                                                                                                                                                                                                                                                                       |                                                                                                                                                                                                                                                           |                                                                                                                                                                                                                                                         |                                                                                                                                                                                                                                                                                                                                                                                                                                                                                                                                                                                                                                                                                                                                                                                                                                                        |                                                                                                                                                                                                                                                                                                                                                                                                                                                                                                                                                                                                        |
|-------------------------------------------------------------------------------------------------------------------------------------------------------------------------------------------------------------------------------------------------------------------------------------------------------------------------------------------------------------------------------------------------------|-----------------------------------------------------------------------------------------------------------------------------------------------------------------------------------------------------------------------------------------------------------|---------------------------------------------------------------------------------------------------------------------------------------------------------------------------------------------------------------------------------------------------------|--------------------------------------------------------------------------------------------------------------------------------------------------------------------------------------------------------------------------------------------------------------------------------------------------------------------------------------------------------------------------------------------------------------------------------------------------------------------------------------------------------------------------------------------------------------------------------------------------------------------------------------------------------------------------------------------------------------------------------------------------------------------------------------------------------------------------------------------------------|--------------------------------------------------------------------------------------------------------------------------------------------------------------------------------------------------------------------------------------------------------------------------------------------------------------------------------------------------------------------------------------------------------------------------------------------------------------------------------------------------------------------------------------------------------------------------------------------------------|
| EPI_ISL_2812356, EPI_ISL_2812359, EPI_ISL_2812362, EPI_ISL_2812363, EPI_ISL_2812364, EPI_ISL_2812367, EPI_ISL_2812368, EPI_ISL_2812369, EPI_ISL_2812373, EPI_ISL_2812374, EPI_ISL_2812386, EPI_ISL_2812387, EPI_ISL_2812391, EPI_ISL_2812396, EPI_ISL_2812402, EPI_ISL_2812407, EPI_ISL_2812411, EPI_ISL_2812412, EPI_ISL_2812419, EPI_ISL_2812425, EPI_ISL_2812426, EPI_ISL_2812429, EPI_ISL_2841638 | see above                                                                                                                                                                                                                                                 | UFS Virology<br>UHAS COVID-19 Lab<br>ULSS 5 Polesana                                                                                                                                                                                                    | KRISP, KZn Research Innovation and Sequencing Platform<br>UHAS COVID-19 Lab<br>Istituto Zooprofilattico Sperimentale dell Venezia                                                                                                                                                                                                                                                                                                                                                                                                                                                                                                                                                                                                                                                                                                                      | Giandhari Jennifer; Naidoo Yesheene; Pillay Sureshnes; San James; Tegally Hourliyah; Tshabuila Derek; Wilkinson Eduan; Yajna Ramphal; de Oliveira Tulio<br>John O. Gyapong and the UHAS COVID-19 Lab Team; Jones Gyamfi; Kwabena O. Duedu; Reuben Ayivor-Djanie<br>Adelaide Milani; Alessia Schivo; Alice Fusaro; Ambra Pastori; Annalisa Salviato; Antonia Ricci; Bianca Zecchin; Calogero Terregino; Erika Giorgia Quaranta; Isabella Monne                                                                                                                                                          |
| EPI_ISL_1664743<br>EPI_ISL_2092861<br>EPI_ISL_2645959,<br>EPI_ISL_2989027,<br>EPI_ISL_2989037<br>EPI_ISL_2796010                                                                                                                                                                                                                                                                                      | UNC Charlotte COVID-19 Testing Lab<br>UNILABS<br>UNILABS                                                                                                                                                                                                  | UMMC-Health<br>UNC Charlotte Environmental Monitoring Laboratory<br>Instituto Nacional de Saude (INSA)                                                                                                                                                  | WHO National Influenza Centre Russian Federation<br>UNC Charlotte Environmental Monitoring Laboratory<br>Instituto Nacional de Saude (INSA)                                                                                                                                                                                                                                                                                                                                                                                                                                                                                                                                                                                                                                                                                                            | Andrey Komissarov; Anna Ivanova; Artem Fadeev; Daria Danilenko; Dmitry Lioznov; Elena Nabieva; Georgii Bazykin; Ksenia Safina; Kseniya Komissarova; Maria Pisareva; Maria Timofeeva; Mikhail Bakaev; Tamila Musaeva; Tatiana Platonova; Veronika Eder<br>Angelica Martins; Cynthia Gibas; Jannatul Ferdous; Jessica Schluter; Kevin Lambirth; Visva Barua<br>Borges et al                                                                                                                                                                                                                              |
| EPI_ISL_853342                                                                                                                                                                                                                                                                                                                                                                                        | UPMC Clinical Microbiology Laboratory                                                                                                                                                                                                                     | UPMC Clinical Microbiology Laboratory                                                                                                                                                                                                                   | Microbial Genome Sequencing Center; Microbial Genomic Epidemiology Laboratory                                                                                                                                                                                                                                                                                                                                                                                                                                                                                                                                                                                                                                                                                                                                                                          | Chineo Ezeonwuku; Dan Snyder; Jane W. Marsh; Kady D. Waggle; Lee H. Harrison; Marissa P. Griffith; Mustapha M. Mustapha; Stephanie L. Mitchell; Vatsala R. Srinivasa; Vaughn S. Cooper                                                                                                                                                                                                                                                                                                                                                                                                                 |
| EPI_ISL_1137240,<br>EPI_ISL_1732367<br>EPI_ISL_983464,<br>EPI_ISL_1227749,<br>EPI_ISL_1227750,<br>EPI_ISL_2278770                                                                                                                                                                                                                                                                                     | UPMC Clinical Microbiology Laboratory<br>URMC LABS                                                                                                                                                                                                        | UPMC Clinical Microbiology Laboratory<br>URMC LABS                                                                                                                                                                                                      | Microbial Genome Sequencing Center; Microbial Genomic Epidemiology Laboratory, University of Pittsburgh<br>Wadsworth Center, New York State Department of Health                                                                                                                                                                                                                                                                                                                                                                                                                                                                                                                                                                                                                                                                                       | Daniel J. Snyder; Jane W. Marsh; Kady D. Waggle; Lee H. Harrison; Marissa P. Griffith; Stephanie L. Mitchell; Vatsala R. Srinivasa; Vaughn S. Cooper<br>Alexis Russel; Alexis Russel; Catharine Prussing; Daryl M. Lamson; Erasmus Schneider; Erica Lasek-Nesselquist; John Kelly; Jonathan Pitnick; Kirsten St. George; Matthew Shudt; Melissa A Leisner; Navjot Singh                                                                                                                                                                                                                                |
| EPI_ISL_2383566,<br>EPI_ISL_2661466<br>EPI_ISL_436045                                                                                                                                                                                                                                                                                                                                                 | US Air Force School of Aerospace Medicine<br>US VI Department of Health                                                                                                                                                                                   | US Air Force School of Aerospace Medicine<br>US VI Department of Health                                                                                                                                                                                 | US Air Force School of Aerospace Medicine<br>Pathogen Discovery, Respiratory Viruses Branch, Division of Viral Diseases, Centers for Disease Control and Prevention                                                                                                                                                                                                                                                                                                                                                                                                                                                                                                                                                                                                                                                                                    | Amanda Javorina; Anthony Fries; Carol Garrett; Clarise Starr; Cole Anderson; Elizabeth Macias; Fritz Castillo; Jennifer Meyer; Sarah Purves; William Gruner<br>Anna Uehara; Bettina Bankamp; Clinton R. Paden; Haibin Wang; Jing Zhang; Krista Queen; Suxiang Tong; Yan Li; Ying Tao; Zachary Weiner                                                                                                                                                                                                                                                                                                   |
| EPI_ISL_903891                                                                                                                                                                                                                                                                                                                                                                                        | UT-Unified State Labs: Public Health Utah DOH                                                                                                                                                                                                             | UT-Unified State Labs: Public Health Utah DOH                                                                                                                                                                                                           | Genomics and Discovery, Respiratory Viruses Branch, Division of Viral Diseases, Centers for Disease Control and Prevention                                                                                                                                                                                                                                                                                                                                                                                                                                                                                                                                                                                                                                                                                                                             | Anna Montmayeur; Anna Uehara; Ben L. Rambo-Martin; Clinton R. Paden; Dhvani Batra; Haibin Wang; Jasmine Padilla; Jing Zhang; Justin Lee; Krista Queen; Lori Rowe; Mark Burroughs; Mili Sheth; Peter W. Cook; Rachel Marine; Sarah Nobles; Suxiang Tong; Yan Li; Ying Tao                                                                                                                                                                                                                                                                                                                               |
| EPI_ISL_424229,<br>EPI_ISL_1324125,<br>EPI_ISL_1621123,<br>EPI_ISL_1785784,<br>EPI_ISL_2194129,<br>EPI_ISL_2773932                                                                                                                                                                                                                                                                                    | UW Virology Lab                                                                                                                                                                                                                                           | UW Virology Lab                                                                                                                                                                                                                                         | UW Virology Lab                                                                                                                                                                                                                                                                                                                                                                                                                                                                                                                                                                                                                                                                                                                                                                                                                                        | Alexander Greninger; Hong Xie; Keith Jerome; Keith R Jerome; Lasata Shrestha; Margaret Mills; Mee-Li Huang; Michelle Lin; Nathan Breit; Noah Baker; Noah R. Baker; Patrick Mathias; Pavitra Roychoudhury; Ricardo Perez; Robert J. Livingston; Saraswathi Sathees; Sean Ellis; Shah Mohamed Bakhsh; Tien V. Nguyen                                                                                                                                                                                                                                                                                     |
| EPI_ISL_734804,<br>EPI_ISL_734899,<br>EPI_ISL_735130<br>EPI_ISL_737958,<br>EPI_ISL_738036<br>EPI_ISL_451189<br>EPI_ISL_2828019                                                                                                                                                                                                                                                                        | UZ Leuven, National Reference Laboratory for Coronaviruses, Laboratory Medicine, Leuven, Belgium<br>Uganda Central Public Health Lab and Uganda Virus Research Institute<br>Uganda Virus Research Institute<br>Unidad de Investigación Molecular (UNIMOL) | KU Leuven, Rega Institute, Clinical and Epidemiological Virology<br>MRC/UVRI & LSHTM Uganda Research Unit<br>MRC/UVRI & LSHTM Uganda Research Unit<br>Instituto Nacional de Salud- Dirección de Investigación en Salud Pública                          | Bert Vanmechelen; Joan Marti-Carerras; Piet Maes; Tony Wawina-Bokalanga<br>Dan Lule Bugembe; Matthew Cotten; My V.T. Phan; Pontiano Kaleebu et al.<br>Beatrice Dhaala; Dan Lule Bugembe; Deogratius Ssemwanga; Henry Kyobe; Henry Mwebesa; Jane Aceng; John Kayaiba; Jonas Lexow; Julius Lutwama; Matthew Cotten; My V.T. Phan; Phionah Tushabe; Pontiano Kaleebu; Stephen Balinandi<br>Carlos Franco-Muñoz; Carmen Osorio; Diana Malo; Diego A. Alvarez-Díaz; Diego Andrés Prada; Gerardo Santamaría; Hector Alejandro Ruiz-Moreno; Jhonattan Reales-González; Jorge Rivera; Juan Camilo Martínez; Julian Naizaque; Katherine Laiton-Donato; Lisseth Pardo; Magdalena Wiesner; Marcela Mercado-Reyes; María T. Herrera-Sepúlveda; Marta Lopez Blanco; Martha Lucia Ospina Martínez; Paola Rojas; Sergio Gomez; Sheryll Corchuelo; Angela Alarcon Cruz |                                                                                                                                                                                                                                                                                                                                                                                                                                                                                                                                                                                                        |
| EPI_ISL_1640127                                                                                                                                                                                                                                                                                                                                                                                       | Uniklinikum Carl Gustav Carus an der TU Dresden; Institut für Virologie                                                                                                                                                                                   | Uniklinikum Carl Gustav Carus an der TU Dresden; Institut für Virologie                                                                                                                                                                                 | Robert Koch Institute                                                                                                                                                                                                                                                                                                                                                                                                                                                                                                                                                                                                                                                                                                                                                                                                                                  |                                                                                                                                                                                                                                                                                                                                                                                                                                                                                                                                                                                                        |
| EPI_ISL_549175, EPI_ISL_1317690, EPI_ISL_1490459, EPI_ISL_2509362, EPI_ISL_2509368, EPI_ISL_2509369, EPI_ISL_3031028                                                                                                                                                                                                                                                                                  | see above                                                                                                                                                                                                                                                 | Unilabs Laboratory Medicine                                                                                                                                                                                                                             | Norwegian Institute of Public Health, Department of Virology                                                                                                                                                                                                                                                                                                                                                                                                                                                                                                                                                                                                                                                                                                                                                                                           | Atiya R Ali; Debech Nadia; Engebretsen Serina Beate; Garcia Lorente Ignacio; Hilde Elshaug; Hilde Synnøve Vollan; Hilde Vollan; Jon Bråte; Kamilla Heddeland Instefjord; Karoline Bragstad; Kathrine Stene-Johansen; Line Victoria Moen; Marie Paulsen Madsen; Olav Hungnes; Pedersen Benedikte Nevjen; Rasmus Riis Kopperud<br>Iris Hasibra; PHE Covid Sequencing Team; Prof Albana Fico; Prof Silvia Bino                                                                                                                                                                                            |
| EPI_ISL_1299863,<br>EPI_ISL_1299864<br>EPI_ISL_812548,<br>EPI_ISL_831801<br>EPI_ISL_569963,<br>EPI_ISL_570008,<br>EPI_ISL_2823743<br>EPI_ISL_888804                                                                                                                                                                                                                                                   | Unit of lab surveillance of viral emerging diseases, National Lab of Influenza<br>United States Air Force School of Aerospace Medicine<br>Unity Health Toronto<br>Univeristy of New Mexico Hospital                                                       | Respiratory Virus Unit, National Infection Service, Public Health England<br>United States Air Force School of Aerospace Medicine<br>Ontario Institute for Cancer Research<br>Center for Global Health, University of New Mexico Health Sciences Center | Iris Hasibra; PHE Covid Sequencing Team; Prof Albana Fico; Prof Silvia Bino<br>Amanda Javorina; Anthony Fries; Clarise Starr; Elizabeth Macias; Jennifer Meyer; Sarah Purves; William Gruner<br>Bernard Lam; Felicia Vincelli; Ilinca Lungu; Jared T. Simpson; Jeremy Johns; Karel Boissinot; Larissa M. Matukas; Le Luu; Mark Downing; Paul Krzyzanowski; Philip Zuzarte; Ramzi Fattouh; Richard de Borja; Samira Mubareka; TIBDN; Trina Otterman; Wai Sum Siu; Yan Chen; Zhi Cui<br>Darrell Dinwiddie; Daryl Domman; Jon Femling; Justin Bacca; Kurt Schwalm                                                                                                                                                                                                                                                                                         |                                                                                                                                                                                                                                                                                                                                                                                                                                                                                                                                                                                                        |
| EPI_ISL_3024078<br>EPI_ISL_697796                                                                                                                                                                                                                                                                                                                                                                     | Universidad Autonoma de Yucatan<br>Universidad Regional Amazonica IKIAM                                                                                                                                                                                   | Universidad Autonoma de Yucatan<br>Universidad Regional Amazonica IKIAM                                                                                                                                                                                 | New York Genome Center<br>Institute of Microbiology, Universidad San Francisco de Quito                                                                                                                                                                                                                                                                                                                                                                                                                                                                                                                                                                                                                                                                                                                                                                | Amy Baldwin; Andre Corvelo; Aviles-Gomez E; Ayora-Talavera G; Chan-Gasca M; Dayna M. Oschwald; Flores-Quintal F; Granja-Perez P; Lopez-Coral L.; Michael Zody; Samantha Fennessey; Tom Maniatis; Villanueva-Jorge S; Yam-Pool E<br>Andrea Carrera; Belén Prado-Vivar; Bernardo Gutiérrez; Carolina Proaño-Bolaños; Fabian Aguilar; Gabriel Trueba; Giovanna Moran; Juan José Guadalupe; Katherine Apunte; Marcelo Ortiz; Michelle Grunauer; Monica Becerra-Wong; Nina Espinoza de los Monteros; Patricio Rojas-Silva; Paul Cárdenas; Sonia Sistema; Sully Márquez; Verónica Barragán; Yeimy Rojas      |
| EPI_ISL_1656146                                                                                                                                                                                                                                                                                                                                                                                       | Universidad Tecnica Particular de Loja                                                                                                                                                                                                                    | Universidad Tecnica Particular de Loja                                                                                                                                                                                                                  | Institute of Microbiology, Universidad San Francisco de Quito                                                                                                                                                                                                                                                                                                                                                                                                                                                                                                                                                                                                                                                                                                                                                                                          | Belén Prado-Vivar; Bernardo Gutiérrez; David Zuñiga; Fernando Serrano; Gabriel Trueba; Juan José Guadalupe; Katherine Ojeda; Luis Flores; Melissa Ortega; Michelle Grunauer; Monica Becerra-Wong; Paola Dalgo; Patricio Rojas-Silva; Paul Cárdenas; Raiza Briceño; Sully Márquez; Verónica Barragán                                                                                                                                                                                                                                                                                                    |
| EPI_ISL_2123875<br>EPI_ISL_812967<br>EPI_ISL_2895002                                                                                                                                                                                                                                                                                                                                                  | Universitätsklinikum Köln; Institut für Virologie<br>University Clinical Research Center, University of Sciences<br>University College Hospital, Ibadan                                                                                                   | Universitätsklinikum Köln; Institut für Virologie<br>University Clinical Research Center, University of Sciences<br>University College Hospital, Ibadan                                                                                                 | Robert Koch Institute<br>University Clinical Research Center, University of Sciences<br>African Centre of Excellence for Genomics of Infectious Diseases (ACEGID), Redeemer's University, Nigeria                                                                                                                                                                                                                                                                                                                                                                                                                                                                                                                                                                                                                                                      | A.A.; Bane, S.; Dao, S.; Diakite, M.; Diarra, B.; Doumbia, S.; Guindo, I.; Iknane; Kone, A.<br>A.T.; Abechi; Ajogbasile; Akano; C.A.; C.T.; Eromon; F.V.; Folarin, O.; Fowotade, A.; Happi; I.B.; J.N.; J.U.; K.O.; Kayode; Nosamiefan, I.; Oguzie; Olawoye; Olumade; Oluniyi; P.E.; P.S.; T.J.; Ugwu; Uwanibe                                                                                                                                                                                                                                                                                         |
| EPI_ISL_741244,<br>EPI_ISL_865865                                                                                                                                                                                                                                                                                                                                                                     | University College London, Great Ormond Street Hospital for Children NHS Foundation Trust, Imperial College Healthcare NHS Trust                                                                                                                          | University College London, Great Ormond Street Hospital for Children NHS Foundation Trust, Imperial College Healthcare NHS Trust                                                                                                                        | COVID-19 Genomics UK (COG-UK) Consortium                                                                                                                                                                                                                                                                                                                                                                                                                                                                                                                                                                                                                                                                                                                                                                                                               | Alison Holmes; Charlotte Williams; Helena Tutill; Jacqueline Findlay; James Price; Judith Breuer; Julianne Brown; Kathryn Harris; Leysa Forrest; Mark Kristiansen; Paola Niola; Paola Resende Silva; Patricia Dyal; Paul Randell; Rachel Williams; Samuel Weeks; Sergi Castellano; Sunando Roy; Tony Brooks; Yasmin Panchbhaya                                                                                                                                                                                                                                                                         |
| EPI_ISL_982819, EPI_ISL_982938, EPI_ISL_982943, EPI_ISL_982954, EPI_ISL_982981, EPI_ISL_983011, EPI_ISL_983187                                                                                                                                                                                                                                                                                        | see above                                                                                                                                                                                                                                                 | University Health Network/Mount Sinai Hospital Department of Microbiology                                                                                                                                                                               | Ontario Institute for Cancer Research                                                                                                                                                                                                                                                                                                                                                                                                                                                                                                                                                                                                                                                                                                                                                                                                                  | Aimee Paterson; Allison McGeer; Angel Liu; Bernard Lam; Cassandra Bergwerff; Ilinca Lungu; Jared T. Simpson; Javier Hernandez; Jeff Wrana; Jessica Bourke; Kin Chan; Kuganya Nirmalarajah; Laurence Pelletier; Lawrence E. Heisler; Lubaina Kothari; Marc Mazzulli; Marie-Ming Aynaud; Michael Laszloffy; Patryk Aftanas; Paul Krzyzanowski; Richard de Borja; Samira Mubareka; Seda Barutcu; Tony Mazzulli                                                                                                                                                                                            |
| EPI_ISL_710555,<br>EPI_ISL_710559,<br>EPI_ISL_710570                                                                                                                                                                                                                                                                                                                                                  | University Hospital Dubrava                                                                                                                                                                                                                               | University Hospital Dubrava                                                                                                                                                                                                                             | Ruder Bošković Institute; Forensic Science Centre Ivan Vučetić; University of Zagreb Faculty of Science                                                                                                                                                                                                                                                                                                                                                                                                                                                                                                                                                                                                                                                                                                                                                | Ana Livun; Antonela Blažeković; Boris Maček; Danilo Licastro; Dunja Glavaš; Fran Borovečki; Fuad Cosović; Gordana Maravić Vlahoviček; Ivan Šamija; Ivana Čelap; Jasna Kašman; Josipa Skelin; Katarina Marija Tupek; Kristian Vlahoviček; Kristina Gotovac Jerčić; Lidija Cvetko-Krajinović; Lucija Bašić; Lucija Markulin; Maja Kuzman; Marina Korolija; Mario Štefanović; Mirjana Domazet-Lošo; Paula Štanc; Zeljka Vrabec; Robert Belužić; Rosa Karić; Sanja Tadinac; Senčica Pejša; Tomislav Domazet-Lošo; Valentina Dumljan-Combaj; Vjekoslav Tomačić; Vladimir Krajinović; Petrica Mačak Šafranko |



|                                                                                                                                                                                                                                                                                                                                                                                                                                                                                                                                                                                                                                                                                                                                                   |                                                                                                                                                             |                                                                                                                                    |                                                                                                                                                                                                                                                                                                                                                                                                                                                                                                                                                                                                                                                                                              |
|---------------------------------------------------------------------------------------------------------------------------------------------------------------------------------------------------------------------------------------------------------------------------------------------------------------------------------------------------------------------------------------------------------------------------------------------------------------------------------------------------------------------------------------------------------------------------------------------------------------------------------------------------------------------------------------------------------------------------------------------------|-------------------------------------------------------------------------------------------------------------------------------------------------------------|------------------------------------------------------------------------------------------------------------------------------------|----------------------------------------------------------------------------------------------------------------------------------------------------------------------------------------------------------------------------------------------------------------------------------------------------------------------------------------------------------------------------------------------------------------------------------------------------------------------------------------------------------------------------------------------------------------------------------------------------------------------------------------------------------------------------------------------|
| EPI_ISL_2790388<br>EPI_ISL_681761                                                                                                                                                                                                                                                                                                                                                                                                                                                                                                                                                                                                                                                                                                                 | University Hospital Foca<br>University Hospital Limerick                                                                                                    | Public Health Institute of Republic of Srpska<br>Irish Coronavirus Sequencing Consortium - Teagasc Moorepark                       | Branka Culibrk; Dijana Vukajlović; Milica Celic; Pava Dimitrijević; Stanka Tomic; Tatjana Marković; Zeljka Sumic<br>Amy Fitzpatrick; Calum Walsh; Carolyn Meaney; Elaine Lawton; Fiona Crispie; John Kenny; Patrick Stapleton; Paul Cotter                                                                                                                                                                                                                                                                                                                                                                                                                                                   |
| EPI_ISL_1254573,<br>EPI_ISL_2357760<br>EPI_ISL_429207                                                                                                                                                                                                                                                                                                                                                                                                                                                                                                                                                                                                                                                                                             | University Hospital of Northern Norway, Department for Microbiology and Infectious Disease Control<br>University Hospitals of Geneva Laboratory of Virology | Norwegian Institute of Public Health, Department of Virology<br>University Hospitals of Geneva Laboratory of Virology              | Atiya R Ali; Debech Nadia; Engebretsen Serina Beate; Garcia Llorente Ignacio; Hilde Elshaug; Hilde Volla; Jon Bråte; Kamilla Heddeland Instefjord; Karoline Bragstad; Kathrine Stene-Johansen; Line Victoria Moen; Marie Paulsen Madsen; Olav Hungenes; Pedersen Benedikte Nevjen; Rasmus Riis Kopperud<br>Laubscher F.                                                                                                                                                                                                                                                                                                                                                                      |
| EPI_ISL_897794                                                                                                                                                                                                                                                                                                                                                                                                                                                                                                                                                                                                                                                                                                                                    | University Hospitals of Geneva, Laboratory of Virology                                                                                                      | HUG, Laboratory of Virology and the Health2030 Genome Center                                                                       | Ana Rita Goncalves; Deborah Penet; Emmanouil Dermitzakis; Henri Pegeot; Ioannis Xenarios; Keith Harshman; Laurent Kaiser; Lorenzo Cerutti; Melyssa Elies; Samuel Cordey                                                                                                                                                                                                                                                                                                                                                                                                                                                                                                                      |
| EPI_ISL_2384717                                                                                                                                                                                                                                                                                                                                                                                                                                                                                                                                                                                                                                                                                                                                   | University Medical Center Hamburg Eppendorf                                                                                                                 | Heinrich Pette Institute, Leibniz Institute for Experimental Virology                                                              | Adam Grundhoff; Alexis Robitaille; Johannes Knobloch; Martin Aepfelbacher; Nicole Fischer; Thomas Günther                                                                                                                                                                                                                                                                                                                                                                                                                                                                                                                                                                                    |
| EPI_ISL_2931002                                                                                                                                                                                                                                                                                                                                                                                                                                                                                                                                                                                                                                                                                                                                   | University of Arkansas for Medical Sciences                                                                                                                 | Center for Global Health, University of New Mexico Health Sciences Center                                                          | Catherine Kirkpatrick; Darrell Dinwiddie; Daryl Domman; David Ussery; Jennifer Laudadio; Joshua L. Kennedy; Kurt Schwalm; Susan Harley; Uday Chaiwadi; Valerie Morley                                                                                                                                                                                                                                                                                                                                                                                                                                                                                                                        |
| EPI_ISL_1072985                                                                                                                                                                                                                                                                                                                                                                                                                                                                                                                                                                                                                                                                                                                                   | University of Balamand                                                                                                                                      | Microbial Genomics Lab, Lebanese American University, Byblos                                                                       | Mira El Chaar; Sima Tokajian; Youssef Bassim                                                                                                                                                                                                                                                                                                                                                                                                                                                                                                                                                                                                                                                 |
| EPI_ISL_2100503                                                                                                                                                                                                                                                                                                                                                                                                                                                                                                                                                                                                                                                                                                                                   | University of Health Sciences                                                                                                                               | Quadram Institute Bioscience                                                                                                       | Alam Khan; Alexander J Trotter; Alison E. Mather; Almina Shafiq; Alp Aydin; Ana P. Tedim; Anastasia Kolyva; Andrew Bell; Andrew J. Page; Claire Stuart; Dave J. Baker; Gemma L. Kay; Javed Akram; John Wain; Justin O'Grady; Leonardo de Oliveira Martins; Lizzie Meadows; Maria Diaz; Mark Webber; Muhammad Bilal Sarwar; Muhammad Roman; Muhammed Yasir; Nabii-Fareed Alikhan; Nadeem Afzal; Ngozi Elumogo; Nicholas M. Thomson; Rachael Stanley; Rachel Gilroy; Reenesh Prakash; Samir Dervisevic; Samuel Bloomfield; Shah Jahan; Sidra-tul-muntaha; Steven Rudder; Thanh Le-Viet<br>John O. Gyapong and the UHAs COVID-19 Lab Team; Jones Gyamfi; Kwabena O. Duedu; Reuben Ayivor-Djanie |
| EPI_ISL_2864611                                                                                                                                                                                                                                                                                                                                                                                                                                                                                                                                                                                                                                                                                                                                   | University of Health and Allied Sciences (UHAS) COVID-19 Testing and Research Centre                                                                        | University of Health and Allied Sciences (UHAS) COVID-19 Testing and Research Centre                                               |                                                                                                                                                                                                                                                                                                                                                                                                                                                                                                                                                                                                                                                                                              |
| EPI_ISL_2500011,<br>EPI_ISL_2728657                                                                                                                                                                                                                                                                                                                                                                                                                                                                                                                                                                                                                                                                                                               | University of Liège COVID-19 testing center                                                                                                                 | GIGA Medical Genomics                                                                                                              | Bouchra Boujemla; Claire Gourzonès; Cécile Meex; Fabrice Bureau; Keith Durkin; Laurent Gillet; Maria Artesi; Marie-Pierre Hayette; Nadine Cambisano; Nathalie Renotte; Olivier Ek; Sébastien Bontems; Vincent Bours; Wouter Coppieters                                                                                                                                                                                                                                                                                                                                                                                                                                                       |
| EPI_ISL_2242506,<br>EPI_ISL_2243223                                                                                                                                                                                                                                                                                                                                                                                                                                                                                                                                                                                                                                                                                                               | University of Maiduguri Teaching Hospital                                                                                                                   | International Centre for Genetic Engineering and Biotechnology (ICGEB) and ARGO Open Lab for Genome Sequencing                     | Alessandro Marcello; Bamidele S Oderinde; Danilo Licastro; Emanuele Orsini; Galadima Gadzama; Marycelin M Baba; Monilade Akinola; Simeone Dal Monego; Zara Wuduri                                                                                                                                                                                                                                                                                                                                                                                                                                                                                                                            |
| EPI_ISL_1118703                                                                                                                                                                                                                                                                                                                                                                                                                                                                                                                                                                                                                                                                                                                                   | University of Michigan Clinical Microbiology Laboratory                                                                                                     | Lauring Lab, University of Michigan, Department of Microbiology and Immunology                                                     | Valesano                                                                                                                                                                                                                                                                                                                                                                                                                                                                                                                                                                                                                                                                                     |
| EPI_ISL_955142,<br>EPI_ISL_955144,<br>EPI_ISL_955148,<br>EPI_ISL_955170,<br>EPI_ISL_1016690,<br>EPI_ISL_1016822                                                                                                                                                                                                                                                                                                                                                                                                                                                                                                                                                                                                                                   | University of Sarajevo, Veterinary Faculty, Laboratory for Molecular Diagnostic and Research Laboratory                                                     | University of Sarajevo, Veterinary Faculty, Laboratory for Molecular Diagnostic and Research Laboratory                            | Alic-Seho A.; Alić-Šeho A.; Goletic S.; Goletic T.; Goletić T.; Goletić Š.; Hodzic A.; Hodžić A.; Jazic A.; Jažić A.; Nicevic M.; Nicević M.; Sabic E.; Softic A.; Softić A.; Terzic I.; Terzić I.; Terzić I. Jažić A.; Šabić E.                                                                                                                                                                                                                                                                                                                                                                                                                                                             |
| EPI_ISL_476078,<br>EPI_ISL_677765                                                                                                                                                                                                                                                                                                                                                                                                                                                                                                                                                                                                                                                                                                                 | University of Szeged, Institute of Clinical Microbiology                                                                                                    | National Laboratory of Virology, Szentágotai Research Centre                                                                       | Balázs Somogyi; Brigitta; Brigitta Zana; Endre Gábor Tóth; Ferenc Jakab; Gabriella Terhes; Gábor Kemenesi; Terhes Gabriella                                                                                                                                                                                                                                                                                                                                                                                                                                                                                                                                                                  |
| EPI_ISL_485391,<br>EPI_ISL_485395                                                                                                                                                                                                                                                                                                                                                                                                                                                                                                                                                                                                                                                                                                                 | University of Ulsan College of Medicine and Asan Medical Center                                                                                             | University of Ulsan College of Medicine and Asan Medical Center                                                                    | Heungsup Sung; Jaewoong Lee; Jina Lee; Jiwon Jung; Jongsik Chun; Kihyun Lee; Kuenyoul Park; Kyu-Hwa Hwang; Mauricio Chailta; Mi-Na Kim; Seok-Hwan Yoon; Sung-Han Kim; and Hae Kyung Lee                                                                                                                                                                                                                                                                                                                                                                                                                                                                                                      |
| EPI_ISL_509950,<br>EPI_ISL_1822080                                                                                                                                                                                                                                                                                                                                                                                                                                                                                                                                                                                                                                                                                                                | University of Wisconsin-Madison AIDS Vaccine Research Laboratories                                                                                          | University of Wisconsin-Madison AIDS Vaccine Research Laboratories                                                                 | Gage Moreno; Katarina Braun; et al. AIDS Vaccine Research Laboratories                                                                                                                                                                                                                                                                                                                                                                                                                                                                                                                                                                                                                       |
| EPI_ISL_977291, EPI_ISL_977342, EPI_ISL_977350, EPI_ISL_977357, EPI_ISL_977367, EPI_ISL_977373, EPI_ISL_977421, EPI_ISL_977422, EPI_ISL_2803362, EPI_ISL_2803437, EPI_ISL_2803449, EPI_ISL_2803512, EPI_ISL_2803529, EPI_ISL_2803584, EPI_ISL_2803629, EPI_ISL_2803630, EPI_ISL_2803631, EPI_ISL_2803632, EPI_ISL_2803635, EPI_ISL_2803636, EPI_ISL_2803638, EPI_ISL_2803639, EPI_ISL_2803645, EPI_ISL_2803646, EPI_ISL_2803648, EPI_ISL_2803666, EPI_ISL_2803668, EPI_ISL_2803673, EPI_ISL_2803674, EPI_ISL_2803685, EPI_ISL_2803687, EPI_ISL_2803693, EPI_ISL_2803694, EPI_ISL_2803698, EPI_ISL_2803701, EPI_ISL_2803702, EPI_ISL_2803709, EPI_ISL_2803714, EPI_ISL_2803716, EPI_ISL_2803718, EPI_ISL_2803729, EPI_ISL_2803730, EPI_ISL_2803732 | UNZAVET and PATH<br>Robert Koch Institute                                                                                                                   | Daniel Bridges; Mulenga Mwenda-Chimfwembe; Ngonda Saasa; ZNPHI and ZGSC                                                            |                                                                                                                                                                                                                                                                                                                                                                                                                                                                                                                                                                                                                                                                                              |
| EPI_ISL_1721045                                                                                                                                                                                                                                                                                                                                                                                                                                                                                                                                                                                                                                                                                                                                   | Universitätsklinikum des Saarlandes - Institut für Virologie                                                                                                | Robert Koch Institute                                                                                                              |                                                                                                                                                                                                                                                                                                                                                                                                                                                                                                                                                                                                                                                                                              |
| EPI_ISL_2382023,<br>EPI_ISL_2382028,<br>EPI_ISL_2382031,<br>EPI_ISL_2382032                                                                                                                                                                                                                                                                                                                                                                                                                                                                                                                                                                                                                                                                       | Universität Innsbruck, Institut für Mikrobiologie                                                                                                           | Bergthaler laboratory, CeMM Research Center for Molecular Medicine of the Austrian Academy of Sciences                             | Andreas Bergthaler; Anna Schedl; Bekir Erguner; Benedikt Agerer; Christoph Bock; Fabian Amman; Jan Laine; Lukas Endler; Maelle Le Moing; Martin Senekowitsch; Michael Schuster; Petr Triska; Thomas Penz                                                                                                                                                                                                                                                                                                                                                                                                                                                                                     |
| EPI_ISL_1286241                                                                                                                                                                                                                                                                                                                                                                                                                                                                                                                                                                                                                                                                                                                                   | Universitätsklinikum Heidelberg                                                                                                                             | Robert Koch Institute                                                                                                              |                                                                                                                                                                                                                                                                                                                                                                                                                                                                                                                                                                                                                                                                                              |
| EPI_ISL_628939, EPI_ISL_1313869, EPI_ISL_2279888, EPI_ISL_2290332, EPI_ISL_2290425, EPI_ISL_2679594, EPI_ISL_2856552, EPI_ISL_2857105                                                                                                                                                                                                                                                                                                                                                                                                                                                                                                                                                                                                             | Utah Public Health Laboratory                                                                                                                               | Utah Public Health Laboratory                                                                                                      | Erin L. Young; Erin Young; Kelly F. Oakeson; Kelly Oakeson; Olinto Linares-Perdomo; Tara Gallagher                                                                                                                                                                                                                                                                                                                                                                                                                                                                                                                                                                                           |
| EPI_ISL_2382667                                                                                                                                                                                                                                                                                                                                                                                                                                                                                                                                                                                                                                                                                                                                   | VERMAAK                                                                                                                                                     | National Institute for Communicable Diseases of the National Health Laboratory Service                                             | Amoako DG; Bhiman JN; Ismail A; Mahlangu B; Mohale T; Ntuli N; Scheepers C                                                                                                                                                                                                                                                                                                                                                                                                                                                                                                                                                                                                                   |
| EPI_ISL_2662532,<br>EPI_ISL_2662536                                                                                                                                                                                                                                                                                                                                                                                                                                                                                                                                                                                                                                                                                                               | VERMAAK LABORATORY                                                                                                                                          | National Institute for Communicable Diseases of the National Health Laboratory Service                                             | Amoako DG; Bhiman JN; Everatt J; Ismail A; Mahlangu B; Mnguni A; Mohale T; Ntuli N; Scheepers C                                                                                                                                                                                                                                                                                                                                                                                                                                                                                                                                                                                              |
| EPI_ISL_1294245                                                                                                                                                                                                                                                                                                                                                                                                                                                                                                                                                                                                                                                                                                                                   | VT Dept. of Health Laboratory                                                                                                                               | Respiratory Viruses Branch, Division of Viral Diseases, Centers for Disease Control and Prevention                                 | Anna Montmayeur; Anna Uehara; Ben L. Rambo-Martin; Clinton R. Paden; Dhvani Batra; Haibin Wang; Jasmine Padilla; Jing Zhang; Justin Lee; Krista Queen; Lori Rowe; Mark Burroughs; Mili Sheth; Peter W. Cook; Rachel Marine; Sarah Nobles; Suxiang Tong; Yan Li; Ying Tao                                                                                                                                                                                                                                                                                                                                                                                                                     |
| EPI_ISL_2494898                                                                                                                                                                                                                                                                                                                                                                                                                                                                                                                                                                                                                                                                                                                                   | Vaccines and Infectious Diseases Analytics Research Unit (VIDA)                                                                                             | KRISP, KZN Research Innovation and Sequencing Platform                                                                             | Baillie Vicky; Giandhari Jennifer; Madhi Shabir; Naidoo Yeshnee; Pillay Sureshnee; San James; Tegally Houriyah; Wilkinson Eduan; de Oliveira Tulio; du Plessis Jeanine                                                                                                                                                                                                                                                                                                                                                                                                                                                                                                                       |
| EPI_ISL_2360774,<br>EPI_ISL_2360878,<br>EPI_ISL_2494391,<br>EPI_ISL_2494501,<br>EPI_ISL_2494557,<br>EPI_ISL_2494585                                                                                                                                                                                                                                                                                                                                                                                                                                                                                                                                                                                                                               | Vaccines and Infectious Diseases Analytics Research Unit (VIDA)                                                                                             | KRISP, Kzn Research Innovation and Sequencing Platform                                                                             | Baillie Vicky; Giandhari Jennifer; Madhi Shabir; Naidoo Yeshnee; Pillay Sureshnee; San James; Tegally Houriyah; Tshabulia Derek; Wilkinson Eduan; de Oliveira Tulio; du Plessis Jeanine                                                                                                                                                                                                                                                                                                                                                                                                                                                                                                      |
| EPI_ISL_2521377,<br>EPI_ISL_3016436                                                                                                                                                                                                                                                                                                                                                                                                                                                                                                                                                                                                                                                                                                               | Valais Hospital, Central Institute                                                                                                                          | Valais Hospital, Central Institute                                                                                                 | Alexis Dumoulin; Deborah Penet; Emmanouil Dermitzakis; Henri Pegeot; Ioannis Xenarios; Keith Harshman; Lorenzo Cerutti; Melyssa Elies                                                                                                                                                                                                                                                                                                                                                                                                                                                                                                                                                        |
| EPI_ISL_1373898                                                                                                                                                                                                                                                                                                                                                                                                                                                                                                                                                                                                                                                                                                                                   | Vanderbilt University Medical Center                                                                                                                        | Pathogen Discovery, Respiratory Viruses Branch, Division of Viral Diseases, Centers for Disease Control and Prevention             | Anna Kelleher; Anna Uehara; Brian Lynch; Clinton R. Paden; Haibin Wang; Han Jia Justin Ng; Jing Zhang; Krista Queen; Peter Cook; Suxiang Tong; Yan Li; Ying Tao                                                                                                                                                                                                                                                                                                                                                                                                                                                                                                                              |
| EPI_ISL_640096                                                                                                                                                                                                                                                                                                                                                                                                                                                                                                                                                                                                                                                                                                                                    | Vanguard CHC wc VGC                                                                                                                                         | NHLS/UCT                                                                                                                           | Arash Iranzadeh; Bruna Galvao; Carolyn Williamson; Deelan Doolabh; Diana Hardie; Innocent Mudau; Kruger Marais; Lynn Tyers; Marvin Hsiao; Stephen Korsman                                                                                                                                                                                                                                                                                                                                                                                                                                                                                                                                    |
| EPI_ISL_2582736                                                                                                                                                                                                                                                                                                                                                                                                                                                                                                                                                                                                                                                                                                                                   | Vermaak & Partners Laboratory                                                                                                                               | National Institute for Communicable Diseases of the National Health Laboratory Service                                             | Amoako DG; Bhiman JN; Everatt J; Ismail A; Mahlangu B; Mnguni A; Mohale T; Ntuli N; Scheepers C                                                                                                                                                                                                                                                                                                                                                                                                                                                                                                                                                                                              |
| EPI_ISL_2001620                                                                                                                                                                                                                                                                                                                                                                                                                                                                                                                                                                                                                                                                                                                                   | Vestfold Hospital, Toensberg Department of Microbiology                                                                                                     | Norwegian Institute of Public Health, Department of Virology                                                                       | Atiya R Ali; Debech Nadia; Engebretsen Serina Beate; Garcia Llorente Ignacio; Hilde Elshaug; Hilde Volla; Jon Bråte; Kamilla Heddeland Instefjord; Karoline Bragstad; Kathrine Stene-Johansen; Marie Paulsen Madsen; Olav Hungenes; Pedersen Benedikte Nevjen; Rasmus Riis Kopperud                                                                                                                                                                                                                                                                                                                                                                                                          |
| EPI_ISL_678490                                                                                                                                                                                                                                                                                                                                                                                                                                                                                                                                                                                                                                                                                                                                    | Veterinary Specialized Institute "Sabac", Serbia                                                                                                            | Veterinary Specialized Institute "Kraljevo", Serbia                                                                                | Afonso, C.; Banovic Djeri, B.; Jankovic, M.; Jovanovic, T.; Knezevic, A.; Mrkovacki, S.; Petrovic, T.; Sekler, M.; Tesovic, B.; Vidanovic, D.; Volkening, J.                                                                                                                                                                                                                                                                                                                                                                                                                                                                                                                                 |
| EPI_ISL_833517                                                                                                                                                                                                                                                                                                                                                                                                                                                                                                                                                                                                                                                                                                                                    | Veterinary Specialized Institute "Nis"                                                                                                                      | Veterinary Specialized Institute "Kraljevo", Serbia                                                                                | Afonso, C.; Banovic Djeri, B.; Jankovic, M.; Jovanovic, T.; Knezevic, A.; Manic, M.; Petrovic, T.; Sekler, M.; Tesovic, B.; Vidanovic, D.; Volkening, J.                                                                                                                                                                                                                                                                                                                                                                                                                                                                                                                                     |
| EPI_ISL_2227827                                                                                                                                                                                                                                                                                                                                                                                                                                                                                                                                                                                                                                                                                                                                   | Veterinary institute in Zvolen, Pod Drahami 918, 960 86 Zvolen Slovakia                                                                                     | Veterinary institute in Zvolen, Pod Drahami 918, 960 86 Zvolen Slovakia                                                            | Dirbáková Z.; Mojžiš M.; Mokryšová Š.; Sujová S.; Tinák M.                                                                                                                                                                                                                                                                                                                                                                                                                                                                                                                                                                                                                                   |
| EPI_ISL_1040814,<br>EPI_ISL_2140693,<br>EPI_ISL_2375993                                                                                                                                                                                                                                                                                                                                                                                                                                                                                                                                                                                                                                                                                           | Victoria Hospital wc VHW                                                                                                                                    | NHLS/UCT                                                                                                                           | Arash Iranzadeh; Bruna Galvao; Carolyn Williamson; Deelan Doolabh; Diana Hardie; Innocent Mudau; Kruger Marais; Lynn Tyers; Marvin Hsiao; Stephen Korsman                                                                                                                                                                                                                                                                                                                                                                                                                                                                                                                                    |
| EPI_ISL_426857,<br>EPI_ISL_456455,<br>EPI_ISL_456565                                                                                                                                                                                                                                                                                                                                                                                                                                                                                                                                                                                                                                                                                              | Victorian Infectious Diseases Reference Laboratory (VIDRL)                                                                                                  | Microbiological Diagnostic Unit Public Health Laboratory and Victorian Infectious Diseases Reference Laboratory, Doherty Institute | Caly L.; Druce J.; Sait, M.; Schultz M.; Seemann T.; Sherry, N.                                                                                                                                                                                                                                                                                                                                                                                                                                                                                                                                                                                                                              |
| EPI_ISL_521971, EPI_ISL_640784, EPI_ISL_779621, EPI_ISL_779622, EPI_ISL_877578, EPI_ISL_1913202, EPI_ISL_1913204, EPI_ISL_1913205, EPI_ISL_1913206, EPI_ISL_1913211, EPI_ISL_2920928, EPI_ISL_2920932, EPI_ISL_2920946, EPI_ISL_2920948, EPI_ISL_2920952, EPI_ISL_2920955, EPI_ISL_2920960, EPI_ISL_2920963, EPI_ISL_2920974, EPI_ISL_2920989, EPI_ISL_2920990, EPI_ISL_2978349, EPI_ISL_3030415                                                                                                                                                                                                                                                                                                                                                  | Victorian Infectious Diseases Reference Laboratory (VIDRL)                                                                                                  | VIDRL and MDU-PHL                                                                                                                  | Caly L.; Druce J.; M.L.; N.L.; Sait, M.; Schultz M.; Schultz M.B.; Seemann T.; Sherry; Sherry, N.                                                                                                                                                                                                                                                                                                                                                                                                                                                                                                                                                                                            |
| EPI_ISL_416410,<br>EPI_ISL_416411,<br>EPI_ISL_419733,<br>EPI_ISL_419735                                                                                                                                                                                                                                                                                                                                                                                                                                                                                                                                                                                                                                                                           | Victorian Infectious Diseases Reference Laboratory (VIDRL)                                                                                                  | Victorian Infectious Diseases Reference Laboratory and Microbiological Diagnostic Unit Public Health Laboratory, Doherty Institute | Caly L.; Druce J.; Sait, M.; Schultz M.; Seemann T.; Sherry, N.; Tairoa, G.                                                                                                                                                                                                                                                                                                                                                                                                                                                                                                                                                                                                                  |
| EPI_ISL_2694573                                                                                                                                                                                                                                                                                                                                                                                                                                                                                                                                                                                                                                                                                                                                   | Viesoji istaiga Respublikine Siauliu ligonine                                                                                                               | National Public Health Surveillance Laboratory                                                                                     | Ana Steponkiene; Danas Baksa; Jelena Razmk; Lukas Vasionis; Lukas Zemaits; Migle Gabrielaitė; Svajune Muralyte                                                                                                                                                                                                                                                                                                                                                                                                                                                                                                                                                                               |

|                                                                                                                                                                                                                                                                                                                                                                                                                                                                                                                                                                                                                                                                                                                                                                                                                                                                                                                                                                                                                                                                                                                                                                                                                                                                                                                                                                                                                                                                                                                                                                                                                                                                                                                                                                                                                                                                                                                                                                                                                                                                                                                                                                                                                                                                                                                                                                                                                                                                                                                                                                                                                                                                                                                                                                                                                                                                                                                                                                                                                                                                                                                                                                                                                                                                                                                                                                                                                                                                                                                                                                                                                                                                                                                                                                                                                                                                                                                                                                                                                                                                                                                                                                                                                                                                                                                                                                                                                                                                                                                                                                                                                                                                                                                                                                                                                                                                                                                                                                                                                                                                                                                                                                                                                                                                                                                                                                                                                                                                                                                                                                                                                                                                                                                                                                                                                                                                                                                                                                                                                                                                                                                                                                                                                                                                                                                                                                                                                                                                                                                                                                                                                                                                                                                                                                                                                                                                                                                                                                                                                                                                                                                                                                                                                                                                                                                                                                                                                                                                                                                                                                                                                                                                                                                                                                                                                                                                                                                                                                                                                                                                                                                                                                                                                                                                                                                                                                                                                                                                                                                                                                                                                                                                                                                                                                                                                                                                                                                                                                                                                                                                                                                                                                                                                                                                                                                                                                                                                                                                                                                                                                                                                                                                                                                                                                                                                                                                                                                                                                                                                                                                                                                                                                                                                                                                                                                                                                                                                                                                                                                                                                                                                                                                                                                                                                                                                                                                                                                                                                                                                                                                                                                                                                                                                                                                                                                                                                                                                                                                                                                                                                                                                                                                                                                                                                                                                                                                                                                                                                                                                                                                                                                                                                                                                                                                                                                                                                                                                                                                                                                                                                                                                                                                                                                                                                                                                                                                                                                                                                                                                                                                                                                                                                                                                                                                                                                                                                                                                                                                                                                                                                                                                                                                                                                                                                                                                                                                                                                                                              |                                                                              |                                                                                                                                                                                                                                                                                                                                                                                                                                                                                                                                                                                                                                                                                                                                                                                                                            |                                                                                                                                                                                                                                                                                                                                                                                                                                                                                                                                                                             |
|--------------------------------------------------------------------------------------------------------------------------------------------------------------------------------------------------------------------------------------------------------------------------------------------------------------------------------------------------------------------------------------------------------------------------------------------------------------------------------------------------------------------------------------------------------------------------------------------------------------------------------------------------------------------------------------------------------------------------------------------------------------------------------------------------------------------------------------------------------------------------------------------------------------------------------------------------------------------------------------------------------------------------------------------------------------------------------------------------------------------------------------------------------------------------------------------------------------------------------------------------------------------------------------------------------------------------------------------------------------------------------------------------------------------------------------------------------------------------------------------------------------------------------------------------------------------------------------------------------------------------------------------------------------------------------------------------------------------------------------------------------------------------------------------------------------------------------------------------------------------------------------------------------------------------------------------------------------------------------------------------------------------------------------------------------------------------------------------------------------------------------------------------------------------------------------------------------------------------------------------------------------------------------------------------------------------------------------------------------------------------------------------------------------------------------------------------------------------------------------------------------------------------------------------------------------------------------------------------------------------------------------------------------------------------------------------------------------------------------------------------------------------------------------------------------------------------------------------------------------------------------------------------------------------------------------------------------------------------------------------------------------------------------------------------------------------------------------------------------------------------------------------------------------------------------------------------------------------------------------------------------------------------------------------------------------------------------------------------------------------------------------------------------------------------------------------------------------------------------------------------------------------------------------------------------------------------------------------------------------------------------------------------------------------------------------------------------------------------------------------------------------------------------------------------------------------------------------------------------------------------------------------------------------------------------------------------------------------------------------------------------------------------------------------------------------------------------------------------------------------------------------------------------------------------------------------------------------------------------------------------------------------------------------------------------------------------------------------------------------------------------------------------------------------------------------------------------------------------------------------------------------------------------------------------------------------------------------------------------------------------------------------------------------------------------------------------------------------------------------------------------------------------------------------------------------------------------------------------------------------------------------------------------------------------------------------------------------------------------------------------------------------------------------------------------------------------------------------------------------------------------------------------------------------------------------------------------------------------------------------------------------------------------------------------------------------------------------------------------------------------------------------------------------------------------------------------------------------------------------------------------------------------------------------------------------------------------------------------------------------------------------------------------------------------------------------------------------------------------------------------------------------------------------------------------------------------------------------------------------------------------------------------------------------------------------------------------------------------------------------------------------------------------------------------------------------------------------------------------------------------------------------------------------------------------------------------------------------------------------------------------------------------------------------------------------------------------------------------------------------------------------------------------------------------------------------------------------------------------------------------------------------------------------------------------------------------------------------------------------------------------------------------------------------------------------------------------------------------------------------------------------------------------------------------------------------------------------------------------------------------------------------------------------------------------------------------------------------------------------------------------------------------------------------------------------------------------------------------------------------------------------------------------------------------------------------------------------------------------------------------------------------------------------------------------------------------------------------------------------------------------------------------------------------------------------------------------------------------------------------------------------------------------------------------------------------------------------------------------------------------------------------------------------------------------------------------------------------------------------------------------------------------------------------------------------------------------------------------------------------------------------------------------------------------------------------------------------------------------------------------------------------------------------------------------------------------------------------------------------------------------------------------------------------------------------------------------------------------------------------------------------------------------------------------------------------------------------------------------------------------------------------------------------------------------------------------------------------------------------------------------------------------------------------------------------------------------------------------------------------------------------------------------------------------------------------------------------------------------------------------------------------------------------------------------------------------------------------------------------------------------------------------------------------------------------------------------------------------------------------------------------------------------------------------------------------------------------------------------------------------------------------------------------------------------------------------------------------------------------------------------------------------------------------------------------------------------------------------------------------------------------------------------------------------------------------------------------------------------------------------------------------------------------------------------------------------------------------------------------------------------------------------------------------------------------------------------------------------------------------------------------------------------------------------------------------------------------------------------------------------------------------------------------------------------------------------------------------------------------------------------------------------------------------------------------------------------------------------------------------------------------------------------------------------------------------------------------------------------------------------------------------------------------------------------------------------------------------------------------------------------------------------------------------------------------------------------------------------------------------------------------------------------------------------------------------------------------------------------------------------------------------------------------------------------------------------------------------------------------------------------------------------------------------------------------------------------------------------------------------------------------------------------------------------------------------------------------------------------------------------------------------------------------------------------------------------------------------------------------------------------------------------------------------------------------------------------------------------------------------------------------------------------------------------------------------------------------------------------------------------------------------------------------------------------------------------------------------------------------------------------------------------------------------------------------------------------------------------------------------------------------------------------------------------------------------------------------------------------------------------------------------------------------------------------------------------------------------------------------------------------------------------------------------------------------------------------------------------------------------------------------------------------------------------------------------------------------------------------------------------------------------------------------------------------------------------------------------------------------------------------------------------------------------------------------------------------------------------------------------------------------------------------------------------------------------------------------------------------------------------------------------------------------------------------------------------------------------------------------------------------------------------------------------------------------------------------------------------------------------------------------------------------------------------------------------------------------------------------------------------------------------------------------------------------------------------------------------------------------------------------------------------------------------------------------------------------------------------------------------------------------------------------------------------------------------------------------------------------------------------------------------------------------------------------------------------------------------------------------------------------------------------------------------------------------------------------------------------------------------------------------------------------------------------------------------------------------------------------------------------------------------------------------------------------------------------------------------------------------------------------------------------------------------------------------------------------------------------------------------------------------------------------------------------------------------------------------|------------------------------------------------------------------------------|----------------------------------------------------------------------------------------------------------------------------------------------------------------------------------------------------------------------------------------------------------------------------------------------------------------------------------------------------------------------------------------------------------------------------------------------------------------------------------------------------------------------------------------------------------------------------------------------------------------------------------------------------------------------------------------------------------------------------------------------------------------------------------------------------------------------------|-----------------------------------------------------------------------------------------------------------------------------------------------------------------------------------------------------------------------------------------------------------------------------------------------------------------------------------------------------------------------------------------------------------------------------------------------------------------------------------------------------------------------------------------------------------------------------|
| EPI_ISL_2339638, EPI_ISL_2510724                                                                                                                                                                                                                                                                                                                                                                                                                                                                                                                                                                                                                                                                                                                                                                                                                                                                                                                                                                                                                                                                                                                                                                                                                                                                                                                                                                                                                                                                                                                                                                                                                                                                                                                                                                                                                                                                                                                                                                                                                                                                                                                                                                                                                                                                                                                                                                                                                                                                                                                                                                                                                                                                                                                                                                                                                                                                                                                                                                                                                                                                                                                                                                                                                                                                                                                                                                                                                                                                                                                                                                                                                                                                                                                                                                                                                                                                                                                                                                                                                                                                                                                                                                                                                                                                                                                                                                                                                                                                                                                                                                                                                                                                                                                                                                                                                                                                                                                                                                                                                                                                                                                                                                                                                                                                                                                                                                                                                                                                                                                                                                                                                                                                                                                                                                                                                                                                                                                                                                                                                                                                                                                                                                                                                                                                                                                                                                                                                                                                                                                                                                                                                                                                                                                                                                                                                                                                                                                                                                                                                                                                                                                                                                                                                                                                                                                                                                                                                                                                                                                                                                                                                                                                                                                                                                                                                                                                                                                                                                                                                                                                                                                                                                                                                                                                                                                                                                                                                                                                                                                                                                                                                                                                                                                                                                                                                                                                                                                                                                                                                                                                                                                                                                                                                                                                                                                                                                                                                                                                                                                                                                                                                                                                                                                                                                                                                                                                                                                                                                                                                                                                                                                                                                                                                                                                                                                                                                                                                                                                                                                                                                                                                                                                                                                                                                                                                                                                                                                                                                                                                                                                                                                                                                                                                                                                                                                                                                                                                                                                                                                                                                                                                                                                                                                                                                                                                                                                                                                                                                                                                                                                                                                                                                                                                                                                                                                                                                                                                                                                                                                                                                                                                                                                                                                                                                                                                                                                                                                                                                                                                                                                                                                                                                                                                                                                                                                                                                                                                                                                                                                                                                                                                                                                                                                                                                                                                                                                                                                             | Viesioji istaiga Vilniaus universiteto ligonine Santaros Klinikos Vilnius    | Vilnius University Hospital Santaros Klinikos, Center of Laboratory Medicine                                                                                                                                                                                                                                                                                                                                                                                                                                                                                                                                                                                                                                                                                                                                               | Daniel Naumovas; Dovile Ezerskyte; Gytis Dudas; Ingrida Olendraite; Laimonas Griskevicius; Ligita Raugaite; Mindaugas Stoskus; Monika Katenaite; Rimvydas Norvilas                                                                                                                                                                                                                                                                                                                                                                                                          |
| EPI_ISL_2779343                                                                                                                                                                                                                                                                                                                                                                                                                                                                                                                                                                                                                                                                                                                                                                                                                                                                                                                                                                                                                                                                                                                                                                                                                                                                                                                                                                                                                                                                                                                                                                                                                                                                                                                                                                                                                                                                                                                                                                                                                                                                                                                                                                                                                                                                                                                                                                                                                                                                                                                                                                                                                                                                                                                                                                                                                                                                                                                                                                                                                                                                                                                                                                                                                                                                                                                                                                                                                                                                                                                                                                                                                                                                                                                                                                                                                                                                                                                                                                                                                                                                                                                                                                                                                                                                                                                                                                                                                                                                                                                                                                                                                                                                                                                                                                                                                                                                                                                                                                                                                                                                                                                                                                                                                                                                                                                                                                                                                                                                                                                                                                                                                                                                                                                                                                                                                                                                                                                                                                                                                                                                                                                                                                                                                                                                                                                                                                                                                                                                                                                                                                                                                                                                                                                                                                                                                                                                                                                                                                                                                                                                                                                                                                                                                                                                                                                                                                                                                                                                                                                                                                                                                                                                                                                                                                                                                                                                                                                                                                                                                                                                                                                                                                                                                                                                                                                                                                                                                                                                                                                                                                                                                                                                                                                                                                                                                                                                                                                                                                                                                                                                                                                                                                                                                                                                                                                                                                                                                                                                                                                                                                                                                                                                                                                                                                                                                                                                                                                                                                                                                                                                                                                                                                                                                                                                                                                                                                                                                                                                                                                                                                                                                                                                                                                                                                                                                                                                                                                                                                                                                                                                                                                                                                                                                                                                                                                                                                                                                                                                                                                                                                                                                                                                                                                                                                                                                                                                                                                                                                                                                                                                                                                                                                                                                                                                                                                                                                                                                                                                                                                                                                                                                                                                                                                                                                                                                                                                                                                                                                                                                                                                                                                                                                                                                                                                                                                                                                                                                                                                                                                                                                                                                                                                                                                                                                                                                                                                                                                                              | Vihiga County referral hospital                                              | USAMRDA- Basic Science Laboratory                                                                                                                                                                                                                                                                                                                                                                                                                                                                                                                                                                                                                                                                                                                                                                                          | Alan Lemtudo; Beth Mutai; Brian Andika; Carol Kifude; Clement Masakwe; Eric Muthanje; Esther Omuseni; Faith Sigei; Gathii Kimita; George Awinda; John Waitumbi; Josphat Nyataya; Rachel Githii; Rehema Liyai; Stephen Ochola                                                                                                                                                                                                                                                                                                                                                |
| EPI_ISL_2802125                                                                                                                                                                                                                                                                                                                                                                                                                                                                                                                                                                                                                                                                                                                                                                                                                                                                                                                                                                                                                                                                                                                                                                                                                                                                                                                                                                                                                                                                                                                                                                                                                                                                                                                                                                                                                                                                                                                                                                                                                                                                                                                                                                                                                                                                                                                                                                                                                                                                                                                                                                                                                                                                                                                                                                                                                                                                                                                                                                                                                                                                                                                                                                                                                                                                                                                                                                                                                                                                                                                                                                                                                                                                                                                                                                                                                                                                                                                                                                                                                                                                                                                                                                                                                                                                                                                                                                                                                                                                                                                                                                                                                                                                                                                                                                                                                                                                                                                                                                                                                                                                                                                                                                                                                                                                                                                                                                                                                                                                                                                                                                                                                                                                                                                                                                                                                                                                                                                                                                                                                                                                                                                                                                                                                                                                                                                                                                                                                                                                                                                                                                                                                                                                                                                                                                                                                                                                                                                                                                                                                                                                                                                                                                                                                                                                                                                                                                                                                                                                                                                                                                                                                                                                                                                                                                                                                                                                                                                                                                                                                                                                                                                                                                                                                                                                                                                                                                                                                                                                                                                                                                                                                                                                                                                                                                                                                                                                                                                                                                                                                                                                                                                                                                                                                                                                                                                                                                                                                                                                                                                                                                                                                                                                                                                                                                                                                                                                                                                                                                                                                                                                                                                                                                                                                                                                                                                                                                                                                                                                                                                                                                                                                                                                                                                                                                                                                                                                                                                                                                                                                                                                                                                                                                                                                                                                                                                                                                                                                                                                                                                                                                                                                                                                                                                                                                                                                                                                                                                                                                                                                                                                                                                                                                                                                                                                                                                                                                                                                                                                                                                                                                                                                                                                                                                                                                                                                                                                                                                                                                                                                                                                                                                                                                                                                                                                                                                                                                                                                                                                                                                                                                                                                                                                                                                                                                                                                                                                                                                                              | Villiersdorp Clinic wc VDP                                                   | NHLS/UCT                                                                                                                                                                                                                                                                                                                                                                                                                                                                                                                                                                                                                                                                                                                                                                                                                   | Arash Iranzadeh; Bruna Galva; Carolyn Williamson; Deelan Doolabh; Diana Hardie; Gert Marais; Innocent Mudau; Lynn Tyers; Marvin Hsiao; Stephen Korsman                                                                                                                                                                                                                                                                                                                                                                                                                      |
| EPI_ISL_904938, EPI_ISL_904952, EPI_ISL_904953                                                                                                                                                                                                                                                                                                                                                                                                                                                                                                                                                                                                                                                                                                                                                                                                                                                                                                                                                                                                                                                                                                                                                                                                                                                                                                                                                                                                                                                                                                                                                                                                                                                                                                                                                                                                                                                                                                                                                                                                                                                                                                                                                                                                                                                                                                                                                                                                                                                                                                                                                                                                                                                                                                                                                                                                                                                                                                                                                                                                                                                                                                                                                                                                                                                                                                                                                                                                                                                                                                                                                                                                                                                                                                                                                                                                                                                                                                                                                                                                                                                                                                                                                                                                                                                                                                                                                                                                                                                                                                                                                                                                                                                                                                                                                                                                                                                                                                                                                                                                                                                                                                                                                                                                                                                                                                                                                                                                                                                                                                                                                                                                                                                                                                                                                                                                                                                                                                                                                                                                                                                                                                                                                                                                                                                                                                                                                                                                                                                                                                                                                                                                                                                                                                                                                                                                                                                                                                                                                                                                                                                                                                                                                                                                                                                                                                                                                                                                                                                                                                                                                                                                                                                                                                                                                                                                                                                                                                                                                                                                                                                                                                                                                                                                                                                                                                                                                                                                                                                                                                                                                                                                                                                                                                                                                                                                                                                                                                                                                                                                                                                                                                                                                                                                                                                                                                                                                                                                                                                                                                                                                                                                                                                                                                                                                                                                                                                                                                                                                                                                                                                                                                                                                                                                                                                                                                                                                                                                                                                                                                                                                                                                                                                                                                                                                                                                                                                                                                                                                                                                                                                                                                                                                                                                                                                                                                                                                                                                                                                                                                                                                                                                                                                                                                                                                                                                                                                                                                                                                                                                                                                                                                                                                                                                                                                                                                                                                                                                                                                                                                                                                                                                                                                                                                                                                                                                                                                                                                                                                                                                                                                                                                                                                                                                                                                                                                                                                                                                                                                                                                                                                                                                                                                                                                                                                                                                                                                                                                               | Vilnius University Hospital Santaros Klinikos, Vilnius University            | Institute of Biotechnology, Life Sciences Center, Vilnius University                                                                                                                                                                                                                                                                                                                                                                                                                                                                                                                                                                                                                                                                                                                                                       | Albertas Timinskas; Alma Gedvilaitė; Aurelija Zvirbiene; Daniel Naumovas; Emilija Vasiliunaitė; Laimonas Griskevicius; Milda Norkiene                                                                                                                                                                                                                                                                                                                                                                                                                                       |
| EPI_ISL_560398, EPI_ISL_560405                                                                                                                                                                                                                                                                                                                                                                                                                                                                                                                                                                                                                                                                                                                                                                                                                                                                                                                                                                                                                                                                                                                                                                                                                                                                                                                                                                                                                                                                                                                                                                                                                                                                                                                                                                                                                                                                                                                                                                                                                                                                                                                                                                                                                                                                                                                                                                                                                                                                                                                                                                                                                                                                                                                                                                                                                                                                                                                                                                                                                                                                                                                                                                                                                                                                                                                                                                                                                                                                                                                                                                                                                                                                                                                                                                                                                                                                                                                                                                                                                                                                                                                                                                                                                                                                                                                                                                                                                                                                                                                                                                                                                                                                                                                                                                                                                                                                                                                                                                                                                                                                                                                                                                                                                                                                                                                                                                                                                                                                                                                                                                                                                                                                                                                                                                                                                                                                                                                                                                                                                                                                                                                                                                                                                                                                                                                                                                                                                                                                                                                                                                                                                                                                                                                                                                                                                                                                                                                                                                                                                                                                                                                                                                                                                                                                                                                                                                                                                                                                                                                                                                                                                                                                                                                                                                                                                                                                                                                                                                                                                                                                                                                                                                                                                                                                                                                                                                                                                                                                                                                                                                                                                                                                                                                                                                                                                                                                                                                                                                                                                                                                                                                                                                                                                                                                                                                                                                                                                                                                                                                                                                                                                                                                                                                                                                                                                                                                                                                                                                                                                                                                                                                                                                                                                                                                                                                                                                                                                                                                                                                                                                                                                                                                                                                                                                                                                                                                                                                                                                                                                                                                                                                                                                                                                                                                                                                                                                                                                                                                                                                                                                                                                                                                                                                                                                                                                                                                                                                                                                                                                                                                                                                                                                                                                                                                                                                                                                                                                                                                                                                                                                                                                                                                                                                                                                                                                                                                                                                                                                                                                                                                                                                                                                                                                                                                                                                                                                                                                                                                                                                                                                                                                                                                                                                                                                                                                                                                                                                               | Vilnius University Hospital Santaros Klinikos, Vilnius University            | Institute of Biotechnology, Life Sciences Center, Vilnius University and Thermo Fisher Scientific                                                                                                                                                                                                                                                                                                                                                                                                                                                                                                                                                                                                                                                                                                                          | Albertas Timinskas; Alma Gedvilaitė; Aurelija Zvirbiene; Daniel Naumovas; Justinas Slikas; Laimonas Griskevicius; Ligita Jancioniene; Mindaugas Paulauskas                                                                                                                                                                                                                                                                                                                                                                                                                  |
| EPI_ISL_933832, EPI_ISL_933912, EPI_ISL_934070, EPI_ISL_1005262, EPI_ISL_1005284, EPI_ISL_1005354                                                                                                                                                                                                                                                                                                                                                                                                                                                                                                                                                                                                                                                                                                                                                                                                                                                                                                                                                                                                                                                                                                                                                                                                                                                                                                                                                                                                                                                                                                                                                                                                                                                                                                                                                                                                                                                                                                                                                                                                                                                                                                                                                                                                                                                                                                                                                                                                                                                                                                                                                                                                                                                                                                                                                                                                                                                                                                                                                                                                                                                                                                                                                                                                                                                                                                                                                                                                                                                                                                                                                                                                                                                                                                                                                                                                                                                                                                                                                                                                                                                                                                                                                                                                                                                                                                                                                                                                                                                                                                                                                                                                                                                                                                                                                                                                                                                                                                                                                                                                                                                                                                                                                                                                                                                                                                                                                                                                                                                                                                                                                                                                                                                                                                                                                                                                                                                                                                                                                                                                                                                                                                                                                                                                                                                                                                                                                                                                                                                                                                                                                                                                                                                                                                                                                                                                                                                                                                                                                                                                                                                                                                                                                                                                                                                                                                                                                                                                                                                                                                                                                                                                                                                                                                                                                                                                                                                                                                                                                                                                                                                                                                                                                                                                                                                                                                                                                                                                                                                                                                                                                                                                                                                                                                                                                                                                                                                                                                                                                                                                                                                                                                                                                                                                                                                                                                                                                                                                                                                                                                                                                                                                                                                                                                                                                                                                                                                                                                                                                                                                                                                                                                                                                                                                                                                                                                                                                                                                                                                                                                                                                                                                                                                                                                                                                                                                                                                                                                                                                                                                                                                                                                                                                                                                                                                                                                                                                                                                                                                                                                                                                                                                                                                                                                                                                                                                                                                                                                                                                                                                                                                                                                                                                                                                                                                                                                                                                                                                                                                                                                                                                                                                                                                                                                                                                                                                                                                                                                                                                                                                                                                                                                                                                                                                                                                                                                                                                                                                                                                                                                                                                                                                                                                                                                                                                                                                                                                            | Vilnius university hospital Santaros Klinikos, Center of Laboratory Medicine | Vilnius university hospital Santaros Klinikos, Center of Laboratory Medicine                                                                                                                                                                                                                                                                                                                                                                                                                                                                                                                                                                                                                                                                                                                                               | Daniel Naumovas; Dovile Ezerskyte; Gytis Dudas; Ingrida Olendraite; Justinas Slikas; Laimonas Griskevicius; Rimvydas Norvilas                                                                                                                                                                                                                                                                                                                                                                                                                                               |
| EPI_ISL_1568231, EPI_ISL_1914247, EPI_ISL_1914248                                                                                                                                                                                                                                                                                                                                                                                                                                                                                                                                                                                                                                                                                                                                                                                                                                                                                                                                                                                                                                                                                                                                                                                                                                                                                                                                                                                                                                                                                                                                                                                                                                                                                                                                                                                                                                                                                                                                                                                                                                                                                                                                                                                                                                                                                                                                                                                                                                                                                                                                                                                                                                                                                                                                                                                                                                                                                                                                                                                                                                                                                                                                                                                                                                                                                                                                                                                                                                                                                                                                                                                                                                                                                                                                                                                                                                                                                                                                                                                                                                                                                                                                                                                                                                                                                                                                                                                                                                                                                                                                                                                                                                                                                                                                                                                                                                                                                                                                                                                                                                                                                                                                                                                                                                                                                                                                                                                                                                                                                                                                                                                                                                                                                                                                                                                                                                                                                                                                                                                                                                                                                                                                                                                                                                                                                                                                                                                                                                                                                                                                                                                                                                                                                                                                                                                                                                                                                                                                                                                                                                                                                                                                                                                                                                                                                                                                                                                                                                                                                                                                                                                                                                                                                                                                                                                                                                                                                                                                                                                                                                                                                                                                                                                                                                                                                                                                                                                                                                                                                                                                                                                                                                                                                                                                                                                                                                                                                                                                                                                                                                                                                                                                                                                                                                                                                                                                                                                                                                                                                                                                                                                                                                                                                                                                                                                                                                                                                                                                                                                                                                                                                                                                                                                                                                                                                                                                                                                                                                                                                                                                                                                                                                                                                                                                                                                                                                                                                                                                                                                                                                                                                                                                                                                                                                                                                                                                                                                                                                                                                                                                                                                                                                                                                                                                                                                                                                                                                                                                                                                                                                                                                                                                                                                                                                                                                                                                                                                                                                                                                                                                                                                                                                                                                                                                                                                                                                                                                                                                                                                                                                                                                                                                                                                                                                                                                                                                                                                                                                                                                                                                                                                                                                                                                                                                                                                                                                                                                                            | Viollier AG                                                                  | Department of Biosystems Science and Engineering, ETH Zürich                                                                                                                                                                                                                                                                                                                                                                                                                                                                                                                                                                                                                                                                                                                                                               | Andrea Patrignani; Andrea Cabral de Gouvea; Catharine Aquino; Chaoran Chen; Christian Beisel; Christiane Beckmann; Christoph Noppen; David Dreifuss; Doris Popovic; Elodie Burcklen; Griffin White; Ina Nissen; Ivan Topolsky; Jay Tracy; Katharina Jahn; Lara Fuhrmann; Laura Neff; Lennart Opitz; Maria Domenica Moccia; Maurice Redondo; Mirjam Feldkamp; Natascha Santacroce; Niko Beerenwinkel; Noemie Santamaria de Souza; Olivier Kobel; Philipp Jablonski; Ralph Schlapbach; Rebecca Denes; Sarah Nadeau; Simon Gruter; Sophie Seidel; Tanja Stadler; Timothy Sykes |
| EPI_ISL_451864, EPI_ISL_486506, EPI_ISL_500907, EPI_ISL_693877, EPI_ISL_721718, EPI_ISL_721726, EPI_ISL_737488, EPI_ISL_737507, EPI_ISL_737516, EPI_ISL_737673, EPI_ISL_737925, EPI_ISL_737925, EPI_ISL_737926, EPI_ISL_767993, EPI_ISL_899061, EPI_ISL_899109, EPI_ISL_899362, EPI_ISL_1001507, EPI_ISL_1002753, EPI_ISL_1002759, EPI_ISL_1002868, EPI_ISL_1003152, EPI_ISL_1003836, EPI_ISL_1004279, EPI_ISL_1059306, EPI_ISL_1119265, EPI_ISL_1119341, EPI_ISL_1119430, EPI_ISL_1119430, EPI_ISL_1130173, EPI_ISL_1130173, EPI_ISL_1130884, EPI_ISL_1195147, EPI_ISL_1195162, EPI_ISL_1195162, EPI_ISL_1259963, EPI_ISL_1260061, EPI_ISL_1260151, EPI_ISL_1260423, EPI_ISL_1406785, EPI_ISL_1407469, EPI_ISL_1408298, EPI_ISL_1408489, EPI_ISL_1408490, EPI_ISL_1408791, EPI_ISL_1496311, EPI_ISL_1597912, EPI_ISL_1750693, EPI_ISL_1750789, EPI_ISL_2152242, EPI_ISL_2211587, EPI_ISL_2307509, EPI_ISL_2308029, EPI_ISL_2375082, EPI_ISL_2375120, EPI_ISL_2662389, EPI_ISL_2820594, EPI_ISL_2820604, EPI_ISL_2938399, EPI_ISL_3007533                                                                                                                                                                                                                                                                                                                                                                                                                                                                                                                                                                                                                                                                                                                                                                                                                                                                                                                                                                                                                                                                                                                                                                                                                                                                                                                                                                                                                                                                                                                                                                                                                                                                                                                                                                                                                                                                                                                                                                                                                                                                                                                                                                                                                                                                                                                                                                                                                                                                                                                                                                                                                                                                                                                                                                                                                                                                                                                                                                                                                                                                                                                                                                                                                                                                                                                                                                                                                                                                                                                                                                                                                                                                                                                                                                                                                                                                                                                                                                                                                                                                                                                                                                                                                                                                                                                                                                                                                                                                                                                                                                                                                                                                                                                                                                                                                                                                                                                                                                                                                                                                                                                                                                                                                                                                                                                                                                                                                                                                                                                                                                                                                                                                                                                                                                                                                                                                                                                                                                                                                                                                                                                                                                                                                                                                                                                                                                                                                                                                                                                                                                                                                                                                                                                                                                                                                                                                                                                                                                                                                                                                                                                                                                                                                                                                                                                                                                                                                                                                                                                                                                                                                                                                                                                                                                                                                                                                                                                                                                                                                                                                                                                                                                                                                                                                                                                                                                                                                                                                                                                                                                                                                                                                                                                                                                                                                                                                                                                                                                                                                                                                                                                                                                                                                                                                                                                                                                                                                                                                                                                                                                                                                                                                                                                                                                                                                                                                                                                                                                                                                                                                                                                                                                                                                                                                                                                                                                                                                                                                                                                                                                                                                                                                                                                                                                                                                                                                                                                                                                                                                                                                                                                                                                                                                                                                                                                                                                                                                                                                                                                                                                                                                                                                                                                                                                                                                                                                                                                                                                                                                                                                                                                                                                                                                                                                                                                                                                                                                                                                                                                                                                                                                                                                                                                                                                                                                                                                                                                    | Department of Biosystems Science and Engineering, ETH Zürich                 | Andrea Patrignani; Andrea Patricia Salzmann; Andrea Cabral de Gouvea; Catharine Aquino; Chaoran Chen; Christian Beisel; Christiane Beckmann; Christoph Noppen; Daniel Ehrsam; David Dreifuss; Deborah Penet; Doris Popovic; Elodie Burcklen; Emmanouil Dermitzakis; Griffin White; Henri Pegeot; Henriette Kurth; Ina Nissen; Ioannis Xenarios; Isabel Stürmer; Ivan Topolsky; Jay Tracy; Katharina Jahn; Keith Harshman; Kim Philipp Jablonski; Lara Fuhrmann; Laura Neff; Lennart Opitz; Lorenzo Cerutti; Maria Domenica Moccia; Maurice Redondo; Mirjam Feldkamp; Natascha Santacroce; Niko Beerenwinkel; Noemie Santamaria de Souza; Pedro Ferreira; Philipp Jablonski; Ralph Schlapbach; Rebecca Denes; Sarah Nadeau; Simon Gruter; Sophie Seidel; Susana Posada-Céspedes; Tanja Stadler; Timothy Sykes; Tobias Schär |                                                                                                                                                                                                                                                                                                                                                                                                                                                                                                                                                                             |
| EPI_ISL_417946, EPI_ISL_420841, EPI_ISL_513597, EPI_ISL_514125, EPI_ISL_527492, EPI_ISL_527532, EPI_ISL_527543, EPI_ISL_527547, EPI_ISL_591086, EPI_ISL_965122, EPI_ISL_965123, EPI_ISL_965124, EPI_ISL_1623757, EPI_ISL_1785567, EPI_ISL_2135837, EPI_ISL_2135838, EPI_ISL_2135840, EPI_ISL_2135841, EPI_ISL_2135843, EPI_ISL_2135844, EPI_ISL_2135845, EPI_ISL_2135846, EPI_ISL_2135847, EPI_ISL_2135848, EPI_ISL_2135849, EPI_ISL_2135850, EPI_ISL_2135851, EPI_ISL_2135852, EPI_ISL_2135853, EPI_ISL_2135854, EPI_ISL_2135855, EPI_ISL_2135856, EPI_ISL_2135857, EPI_ISL_2135858, EPI_ISL_2135859, EPI_ISL_2135860, EPI_ISL_2135861, EPI_ISL_2135862, EPI_ISL_2135863, EPI_ISL_2135864, EPI_ISL_2135865, EPI_ISL_2135866, EPI_ISL_2135867, EPI_ISL_2135868, EPI_ISL_2135869, EPI_ISL_2135870, EPI_ISL_2135871, EPI_ISL_2135872, EPI_ISL_2135873, EPI_ISL_2135874, EPI_ISL_2135875, EPI_ISL_2135876, EPI_ISL_2135877, EPI_ISL_2135878, EPI_ISL_2135879, EPI_ISL_2135880, EPI_ISL_2135881, EPI_ISL_2135882, EPI_ISL_2135883, EPI_ISL_2135884, EPI_ISL_2135885, EPI_ISL_2135886, EPI_ISL_2135887, EPI_ISL_2135888, EPI_ISL_2135889, EPI_ISL_2135890, EPI_ISL_2135891, EPI_ISL_2135892, EPI_ISL_2135893, EPI_ISL_2135894, EPI_ISL_2135895, EPI_ISL_2135896, EPI_ISL_2135897, EPI_ISL_2135898, EPI_ISL_2135899, EPI_ISL_2135900, EPI_ISL_2135901, EPI_ISL_2135902, EPI_ISL_2135903, EPI_ISL_2135904, EPI_ISL_2135905, EPI_ISL_2135906, EPI_ISL_2135907, EPI_ISL_2135908, EPI_ISL_2135909, EPI_ISL_2135910, EPI_ISL_2135911, EPI_ISL_2135912, EPI_ISL_2135913, EPI_ISL_2135914, EPI_ISL_2135915, EPI_ISL_2135916, EPI_ISL_2135917, EPI_ISL_2135918, EPI_ISL_2135919, EPI_ISL_2135920, EPI_ISL_2135921, EPI_ISL_2135922, EPI_ISL_2135923, EPI_ISL_2135924, EPI_ISL_2135925, EPI_ISL_2135926, EPI_ISL_2135927, EPI_ISL_2135928, EPI_ISL_2135929, EPI_ISL_2135930, EPI_ISL_2135931, EPI_ISL_2135932, EPI_ISL_2135933, EPI_ISL_2135934, EPI_ISL_2135935, EPI_ISL_2135936, EPI_ISL_2135937, EPI_ISL_2135938, EPI_ISL_2135939, EPI_ISL_2135940, EPI_ISL_2135941, EPI_ISL_2135942, EPI_ISL_2135943, EPI_ISL_2135944, EPI_ISL_2135945, EPI_ISL_2135946, EPI_ISL_2135947, EPI_ISL_2135948, EPI_ISL_2135949, EPI_ISL_2135950, EPI_ISL_2135951, EPI_ISL_2135952, EPI_ISL_2135953, EPI_ISL_2135954, EPI_ISL_2135955, EPI_ISL_2135956, EPI_ISL_2135957, EPI_ISL_2135958, EPI_ISL_2135959, EPI_ISL_2135960, EPI_ISL_2135961, EPI_ISL_2135962, EPI_ISL_2135963, EPI_ISL_2135964, EPI_ISL_2135965, EPI_ISL_2135966, EPI_ISL_2135967, EPI_ISL_2135968, EPI_ISL_2135969, EPI_ISL_2135970, EPI_ISL_2135971, EPI_ISL_2135972, EPI_ISL_2135973, EPI_ISL_2135974, EPI_ISL_2135975, EPI_ISL_2135976, EPI_ISL_2135977, EPI_ISL_2135978, EPI_ISL_2135979, EPI_ISL_2135980, EPI_ISL_2135981, EPI_ISL_2135982, EPI_ISL_2135983, EPI_ISL_2135984, EPI_ISL_2135985, EPI_ISL_2135986, EPI_ISL_2135987, EPI_ISL_2135988, EPI_ISL_2135989, EPI_ISL_2135990, EPI_ISL_2135991, EPI_ISL_2135992, EPI_ISL_2135993, EPI_ISL_2135994, EPI_ISL_2135995, EPI_ISL_2135996, EPI_ISL_2135997, EPI_ISL_2135998, EPI_ISL_2135999, EPI_ISL_2136000, EPI_ISL_2136001, EPI_ISL_2136002, EPI_ISL_2136003, EPI_ISL_2136004, EPI_ISL_2136005, EPI_ISL_2136006, EPI_ISL_2136007, EPI_ISL_2136008, EPI_ISL_2136009, EPI_ISL_2136010, EPI_ISL_2136011, EPI_ISL_2136012, EPI_ISL_2136013, EPI_ISL_2136014, EPI_ISL_2136015, EPI_ISL_2136016, EPI_ISL_2136017, EPI_ISL_2136018, EPI_ISL_2136019, EPI_ISL_2136020, EPI_ISL_2136021, EPI_ISL_2136022, EPI_ISL_2136023, EPI_ISL_2136024, EPI_ISL_2136025, EPI_ISL_2136026, EPI_ISL_2136027, EPI_ISL_2136028, EPI_ISL_2136029, EPI_ISL_2136030, EPI_ISL_2136031, EPI_ISL_2136032, EPI_ISL_2136033, EPI_ISL_2136034, EPI_ISL_2136035, EPI_ISL_2136036, EPI_ISL_2136037, EPI_ISL_2136038, EPI_ISL_2136039, EPI_ISL_2136040, EPI_ISL_2136041, EPI_ISL_2136042, EPI_ISL_2136043, EPI_ISL_2136044, EPI_ISL_2136045, EPI_ISL_2136046, EPI_ISL_2136047, EPI_ISL_2136048, EPI_ISL_2136049, EPI_ISL_2136050, EPI_ISL_2136051, EPI_ISL_2136052, EPI_ISL_2136053, EPI_ISL_2136054, EPI_ISL_2136055, EPI_ISL_2136056, EPI_ISL_2136057, EPI_ISL_2136058, EPI_ISL_2136059, EPI_ISL_2136060, EPI_ISL_2136061, EPI_ISL_2136062, EPI_ISL_2136063, EPI_ISL_2136064, EPI_ISL_2136065, EPI_ISL_2136066, EPI_ISL_2136067, EPI_ISL_2136068, EPI_ISL_2136069, EPI_ISL_2136070, EPI_ISL_2136071, EPI_ISL_2136072, EPI_ISL_2136073, EPI_ISL_2136074, EPI_ISL_2136075, EPI_ISL_2136076, EPI_ISL_2136077, EPI_ISL_2136078, EPI_ISL_2136079, EPI_ISL_2136080, EPI_ISL_2136081, EPI_ISL_2136082, EPI_ISL_2136083, EPI_ISL_2136084, EPI_ISL_2136085, EPI_ISL_2136086, EPI_ISL_2136087, EPI_ISL_2136088, EPI_ISL_2136089, EPI_ISL_2136090, EPI_ISL_2136091, EPI_ISL_2136092, EPI_ISL_2136093, EPI_ISL_2136094, EPI_ISL_2136095, EPI_ISL_2136096, EPI_ISL_2136097, EPI_ISL_2136098, EPI_ISL_2136099, EPI_ISL_2136100, EPI_ISL_2136101, EPI_ISL_2136102, EPI_ISL_2136103, EPI_ISL_2136104, EPI_ISL_2136105, EPI_ISL_2136106, EPI_ISL_2136107, EPI_ISL_2136108, EPI_ISL_2136109, EPI_ISL_2136110, EPI_ISL_2136111, EPI_ISL_2136112, EPI_ISL_2136113, EPI_ISL_2136114, EPI_ISL_2136115, EPI_ISL_2136116, EPI_ISL_2136117, EPI_ISL_2136118, EPI_ISL_2136119, EPI_ISL_2136120, EPI_ISL_2136121, EPI_ISL_2136122, EPI_ISL_2136123, EPI_ISL_2136124, EPI_ISL_2136125, EPI_ISL_2136126, EPI_ISL_2136127, EPI_ISL_2136128, EPI_ISL_2136129, EPI_ISL_2136130, EPI_ISL_2136131, EPI_ISL_2136132, EPI_ISL_2136133, EPI_ISL_2136134, EPI_ISL_2136135, EPI_ISL_2136136, EPI_ISL_2136137, EPI_ISL_2136138, EPI_ISL_2136139, EPI_ISL_2136140, EPI_ISL_2136141, EPI_ISL_2136142, EPI_ISL_2136143, EPI_ISL_2136144, EPI_ISL_2136145, EPI_ISL_2136146, EPI_ISL_2136147, EPI_ISL_2136148, EPI_ISL_2136149, EPI_ISL_2136150, EPI_ISL_2136151, EPI_ISL_2136152, EPI_ISL_2136153, EPI_ISL_2136154, EPI_ISL_2136155, EPI_ISL_2136156, EPI_ISL_2136157, EPI_ISL_2136158, EPI_ISL_2136159, EPI_ISL_2136160, EPI_ISL_2136161, EPI_ISL_2136162, EPI_ISL_2136163, EPI_ISL_2136164, EPI_ISL_2136165, EPI_ISL_2136166, EPI_ISL_2136167, EPI_ISL_2136168, EPI_ISL_2136169, EPI_ISL_2136170, EPI_ISL_2136171, EPI_ISL_2136172, EPI_ISL_2136173, EPI_ISL_2136174, EPI_ISL_2136175, EPI_ISL_2136176, EPI_ISL_2136177, EPI_ISL_2136178, EPI_ISL_2136179, EPI_ISL_2136180, EPI_ISL_2136181, EPI_ISL_2136182, EPI_ISL_2136183, EPI_ISL_2136184, EPI_ISL_2136185, EPI_ISL_2136186, EPI_ISL_2136187, EPI_ISL_2136188, EPI_ISL_2136189, EPI_ISL_2136190, EPI_ISL_2136191, EPI_ISL_2136192, EPI_ISL_2136193, EPI_ISL_2136194, EPI_ISL_2136195, EPI_ISL_2136196, EPI_ISL_2136197, EPI_ISL_2136198, EPI_ISL_2136199, EPI_ISL_2136200, EPI_ISL_2136201, EPI_ISL_2136202, EPI_ISL_2136203, EPI_ISL_2136204, EPI_ISL_2136205, EPI_ISL_2136206, EPI_ISL_2136207, EPI_ISL_2136208, EPI_ISL_2136209, EPI_ISL_2136210, EPI_ISL_2136211, EPI_ISL_2136212, EPI_ISL_2136213, EPI_ISL_2136214, EPI_ISL_2136215, EPI_ISL_2136216, EPI_ISL_2136217, EPI_ISL_2136218, EPI_ISL_2136219, EPI_ISL_2136220, EPI_ISL_2136221, EPI_ISL_2136222, EPI_ISL_2136223, EPI_ISL_2136224, EPI_ISL_2136225, EPI_ISL_2136226, EPI_ISL_2136227, EPI_ISL_2136228, EPI_ISL_2136229, EPI_ISL_2136230, EPI_ISL_2136231, EPI_ISL_2136232, EPI_ISL_2136233, EPI_ISL_2136234, EPI_ISL_2136235, EPI_ISL_2136236, EPI_ISL_2136237, EPI_ISL_2136238, EPI_ISL_2136239, EPI_ISL_2136240, EPI_ISL_2136241, EPI_ISL_2136242, EPI_ISL_2136243, EPI_ISL_2136244, EPI_ISL_2136245, EPI_ISL_2136246, EPI_ISL_2136247, EPI_ISL_2136248, EPI_ISL_2136249, EPI_ISL_2136250, EPI_ISL_2136251, EPI_ISL_2136252, EPI_ISL_2136253, EPI_ISL_2136254, EPI_ISL_2136255, EPI_ISL_2136256, EPI_ISL_2136257, EPI_ISL_2136258, EPI_ISL_2136259, EPI_ISL_2136260, EPI_ISL_2136261, EPI_ISL_2136262, EPI_ISL_2136263, EPI_ISL_2136264, EPI_ISL_2136265, EPI_ISL_2136266, EPI_ISL_2136267, EPI_ISL_2136268, EPI_ISL_2136269, EPI_ISL_2136270, EPI_ISL_2136271, EPI_ISL_2136272, EPI_ISL_2136273, EPI_ISL_2136274, EPI_ISL_2136275, EPI_ISL_2136276, EPI_ISL_2136277, EPI_ISL_2136278, EPI_ISL_2136279, EPI_ISL_2136280, EPI_ISL_2136281, EPI_ISL_2136282, EPI_ISL_2136283, EPI_ISL_2136284, EPI_ISL_2136285, EPI_ISL_2136286, EPI_ISL_2136287, EPI_ISL_2136288, EPI_ISL_2136289, EPI_ISL_2136290, EPI_ISL_2136291, EPI_ISL_2136292, EPI_ISL_2136293, EPI_ISL_2136294, EPI_ISL_2136295, EPI_ISL_2136296, EPI_ISL_2136297, EPI_ISL_2136298, EPI_ISL_2136299, EPI_ISL_2136300, EPI_ISL_2136301, EPI_ISL_2136302, EPI_ISL_2136303, EPI_ISL_2136304, EPI_ISL_2136305, EPI_ISL_2136306, EPI_ISL_2136307, EPI_ISL_2136308, EPI_ISL_2136309, EPI_ISL_2136310, EPI_ISL_2136311, EPI_ISL_2136312, EPI_ISL_2136313, EPI_ISL_2136314, EPI_ISL_2136315, EPI_ISL_2136316, EPI_ISL_2136317, EPI_ISL_2136318, EPI_ISL_2136319, EPI_ISL_2136320, EPI_ISL_2136321, EPI_ISL_2136322, EPI_ISL_2136323, EPI_ISL_2136324, EPI_ISL_2136325, EPI_ISL_2136326, EPI_ISL_2136327, EPI_ISL_2136328, EPI_ISL_2136329, EPI_ISL_2136330, EPI_ISL_2136331, EPI_ISL_2136332, EPI_ISL_2136333, EPI_ISL_2136334, EPI_ISL_2136335, EPI_ISL_2136336, EPI_ISL_2136337, EPI_ISL_2136338, EPI_ISL_2136339, EPI_ISL_2136340, EPI_ISL_2136341, EPI_ISL_2136342, EPI_ISL_2136343, EPI_ISL_2136344, EPI_ISL_2136345, EPI_ISL_2136346, EPI_ISL_2136347, EPI_ISL_2136348, EPI_ISL_2136349, EPI_ISL_2136350, EPI_ISL_2136351, EPI_ISL_2136352, EPI_ISL_2136353, EPI_ISL_2136354, EPI_ISL_2136355, EPI_ISL_2136356, EPI_ISL_2136357, EPI_ISL_2136358, EPI_ISL_2136359, EPI_ISL_2136360, EPI_ISL_2136361, EPI_ISL_2136362, EPI_ISL_2136363, EPI_ISL_2136364, EPI_ISL_2136365, EPI_ISL_2136366, EPI_ISL_2136367, EPI_ISL_2136368, EPI_ISL_2136369, EPI_ISL_2136370, EPI_ISL_2136371, EPI_ISL_2136372, EPI_ISL_2136373, EPI_ISL_2136374, EPI_ISL_2136375, EPI_ISL_2136376, EPI_ISL_2136377, EPI_ISL_2136378, EPI_ISL_2136379, EPI_ISL_2136380, EPI_ISL_2136381, EPI_ISL_2136382, EPI_ISL_2136383, EPI_ISL_2136384, EPI_ISL_2136385, EPI_ISL_2136386, EPI_ISL_2136387, EPI_ISL_2136388, EPI_ISL_2136389, EPI_ISL_2136390, EPI_ISL_2136391, EPI_ISL_2136392, EPI_ISL_2136393, EPI_ISL_2136394, EPI_ISL_2136395, EPI_ISL_2136396, EPI_ISL_2136397, EPI_ISL_2136398, EPI_ISL_2136399, EPI_ISL_2136400, EPI_ISL_2136401, EPI_ISL_2136402, EPI_ISL_2136403, EPI_ISL_2136404, EPI_ISL_2136405, EPI_ISL_2136406, EPI_ISL_2136407, EPI_ISL_2136408, EPI_ISL_2136409, EPI_ISL_2136410, EPI_ISL_2136411, EPI_ISL_2136412, EPI_ISL_2136413, EPI_ISL_2136414, EPI_ISL_2136415, EPI_ISL_2136416, EPI_ISL_2136417, EPI_ISL_2136418, EPI_ISL_2136419, EPI_ISL_2136420, EPI_ISL_2136421, EPI_ISL_2136422, EPI_ISL_2136423, EPI_ISL_2136424, EPI_ISL_2136425, EPI_ISL_2136426, EPI_ISL_2136427, EPI_ISL_2136428, EPI_ISL_2136429, EPI_ISL_2136430, EPI_ISL_2136431, EPI_ISL_2136432, EPI_ISL_2136433, EPI_ISL_2136434, EPI_ISL_2136435, EPI_ISL_2136436, EPI_ISL_2136437, EPI_ISL_2136438, EPI_ISL_2136439, EPI_ISL_2136440, EPI_ISL_2136441, EPI_ISL_2136442, EPI_ISL_2136443, EPI_ISL_2136444, EPI_ISL_2136445, EPI_ISL_2136446, EPI_ISL_2136447, EPI_ISL_2136448, EPI_ISL_2136449, EPI_ISL_2136450, EPI_ISL_2136451, EPI_ISL_2136452, EPI_ISL_2136453, EPI_ISL_2136454, EPI_ISL_2136455, EPI_ISL_2136456, EPI_ISL_2136457, EPI_ISL_2136458, EPI_ISL_2136459, EPI_ISL_2136460, EPI_ISL_2136461, EPI_ISL_2136462, EPI_ISL_2136463, EPI_ISL_2136464, EPI_ISL_2136465, EPI_ISL_2136466, EPI_ISL_2136467, EPI_ISL_2136468, EPI_ISL_2136469, EPI_ISL_2136470, EPI_ISL_2136471, EPI_ISL_2136472, EPI_ISL_2136473, EPI_ISL_2136474, EPI_ISL_2136475, EPI_ISL_2136476, EPI_ISL_2136477, EPI_ISL_2136478, EPI_ISL_2136479, EPI_ISL_2136480, EPI_ISL_2136481, EPI_ISL_2136482, EPI_ISL_2136483, EPI_ISL_2136484, EPI_ISL_2136485, EPI_ISL_2136486, EPI_ISL_2136487, EPI_ISL_2136488, EPI_ISL_2136489, EPI_ISL_2136490, EPI_ISL_2136491, EPI_ISL_2136492, EPI_ISL_2136493, EPI_ISL_2136494, EPI_ISL_2136495, EPI_ISL_2136496, EPI_ISL_2136497, EPI_ISL_2136498, EPI_ISL_2136499, EPI_ISL_2136500, EPI_ISL_2136501, EPI_ISL_2136502, EPI_ISL_2136503, EPI_ISL_2136504, EPI_ISL_2136505, EPI_ISL_2136506, EPI_ISL_2136507, EPI_ISL_2136508, EPI_ISL_2136509, EPI_ISL_2136510, EPI_ISL_2136511, EPI_ISL_2136512, EPI_ISL_2136513, EPI_ISL_2136514, EPI_ISL_2136515, EPI_ISL_2136516, EPI_ISL_2136517, EPI_ISL_2136518, EPI_ISL_2136519, EPI_ISL_2136520, EPI_ISL_2136521, EPI_ISL_2136522, EPI_ISL_2136523, EPI_ISL_2136524, EPI_ISL_2136525, EPI_ISL_2136526, EPI_ISL_2136527, EPI_ISL_2136528, EPI_ISL_2136529, EPI_ISL_2136530, EPI_ISL_2136531, EPI_ISL_2136532, EPI_ISL_2136533, EPI_ISL_2136534, EPI_ISL_2136535, EPI_ISL_2136536, EPI_ISL_2136537, EPI_ISL_2136538, EPI_ISL_2136539, EPI_ISL_2136540, EPI_ISL_2136541, EPI_ISL_2136542, EPI_ISL_2136543, EPI_ISL_2136544, EPI_ISL_2136545, EPI_ISL_2136546, EPI_ISL_2136547, EPI_ISL_2136548, EPI_ISL_2136549, EPI_ISL_2136550, EPI_ISL_2136551, EPI_ISL_2136552, EPI_ISL_2136553, EPI_ISL_2136554, EPI_ISL_2136555, EPI_ISL_2136556, EPI_ISL_2136557, EPI_ISL_2136558, EPI_ISL_2136559, EPI_ISL_2136560, EPI_ISL_2136561, EPI_ISL_2136562, EPI_ISL_2136563, EPI_ISL_2136564, EPI_ISL_2136565, EPI_ISL_2136566, EPI_ISL_2136567, EPI_ISL_2136568, EPI_ISL_2136569, EPI_ISL_2136570, EPI_ISL_2136571, EPI_ISL_2136572, EPI_ISL_2136573, EPI_ISL_2136574, EPI_ISL_2136575, EPI_ISL_2136576, EPI_ISL_2136577, EPI_ISL_2136578, EPI_ISL_2136579, EPI_ISL_2136580, EPI_ISL_2136581, EPI_ISL_2136582, EPI_ISL_2136583, EPI_ISL_2136584, EPI_ISL_2136585, EPI_ISL_2136586, EPI_ISL_2136587, EPI_ISL_2136588, EPI_ISL_2136589, EPI_ISL_2136590, EPI_ISL_2136591, EPI_ISL_2136592, EPI_ISL_2136593, EPI_ISL_2136594, EPI_ISL_2136595, EPI_ISL_2136596, EPI_ISL_2136597, EPI_ISL_2136598, EPI_ISL_2136599, EPI_ISL_2136600, EPI_ISL_2136601, EPI_ISL_2136602, EPI_ISL_2136603, EPI_ISL_2136604, EPI_ISL_2136605, EPI_ISL_2136606, EPI_ISL_2136607, EPI_ISL_2136608, EPI_ISL_2136609, EPI_ISL_2136610, EPI_ISL_2136611, EPI_ISL_2136612, EPI_ISL_2136613, EPI |                                                                              |                                                                                                                                                                                                                                                                                                                                                                                                                                                                                                                                                                                                                                                                                                                                                                                                                            |                                                                                                                                                                                                                                                                                                                                                                                                                                                                                                                                                                             |

|                                                                                                                     |                                                                                                                                                                                                                             |                                                                                                                                                                                           |                                                                                                                                                                                                                                                                                                                                                                                                                                                                                                                                                                                                                                                                                                                                                                                                                                  |                                                                                                                                                                                                                                                                                                                                                                                                                                                                                                                                                                                                                  |
|---------------------------------------------------------------------------------------------------------------------|-----------------------------------------------------------------------------------------------------------------------------------------------------------------------------------------------------------------------------|-------------------------------------------------------------------------------------------------------------------------------------------------------------------------------------------|----------------------------------------------------------------------------------------------------------------------------------------------------------------------------------------------------------------------------------------------------------------------------------------------------------------------------------------------------------------------------------------------------------------------------------------------------------------------------------------------------------------------------------------------------------------------------------------------------------------------------------------------------------------------------------------------------------------------------------------------------------------------------------------------------------------------------------|------------------------------------------------------------------------------------------------------------------------------------------------------------------------------------------------------------------------------------------------------------------------------------------------------------------------------------------------------------------------------------------------------------------------------------------------------------------------------------------------------------------------------------------------------------------------------------------------------------------|
| EPI_ISL_960805,<br>EPI_ISL_960806,<br>EPI_ISL_960809                                                                |                                                                                                                                                                                                                             |                                                                                                                                                                                           |                                                                                                                                                                                                                                                                                                                                                                                                                                                                                                                                                                                                                                                                                                                                                                                                                                  |                                                                                                                                                                                                                                                                                                                                                                                                                                                                                                                                                                                                                  |
| EPI_ISL_1627990                                                                                                     | WSSE w Krakowie                                                                                                                                                                                                             | 1. National Institute of Public Health - National Institute of Hygiene; 2. Eurofins Genomics Europe Sequencing GmbH                                                                       | ECDC COVID-19 WGS support team; Eurofins Genomics Europe Sequencing Team; Gierczyński Rafał; Sadkowska-Todys Małgorzata; Wolkowicz Tomasz; Zacharczuk Katarzyna                                                                                                                                                                                                                                                                                                                                                                                                                                                                                                                                                                                                                                                                  |                                                                                                                                                                                                                                                                                                                                                                                                                                                                                                                                                                                                                  |
| EPI_ISL_2365408,<br>EPI_ISL_2365412                                                                                 | WWF Bayanga field laboratory                                                                                                                                                                                                | Robert Koch Institute                                                                                                                                                                     | F. H. Leendertz; F. S. Niatou-Singa; M. Ulrich; S. Calvignac-Spencer; T. B. Tombolomako; T. Fuh-Neba; U. Vickos                                                                                                                                                                                                                                                                                                                                                                                                                                                                                                                                                                                                                                                                                                                  |                                                                                                                                                                                                                                                                                                                                                                                                                                                                                                                                                                                                                  |
| EPI_ISL_2365414,<br>EPI_ISL_2365415,<br>EPI_ISL_2365416,<br>EPI_ISL_2365417                                         | WWF Bayanga field laboratory                                                                                                                                                                                                | WWF Bayanga field laboratory                                                                                                                                                              | F. H. Leendertz; F. S. Niatou-Singa; M. Ulrich; S. Calvignac-Spencer; T. B. Tombolomako; T. Fuh-Neba; U. Vickos                                                                                                                                                                                                                                                                                                                                                                                                                                                                                                                                                                                                                                                                                                                  |                                                                                                                                                                                                                                                                                                                                                                                                                                                                                                                                                                                                                  |
| EPI_ISL_2987085                                                                                                     | WY Public Health Laboratory                                                                                                                                                                                                 | Centers for Disease Control and Prevention Division of Viral Diseases, Pathogen Discovery                                                                                                 | Alison Lauffer Halpin; Ben L. Rambo-Martin; Clinton R. Paden; Dakota Howard; Darlene Wagner; Dave Wentworth; Dhvani Batra; Jasmine Padilla; Justin Lee; Katie Dillon; Krista Queen; Kristen Nripe; Kristine Lacek; Mark Burroughs; Matthew Schremer; Mili Sheth; Peter Cook; Sam Shepard; Sarah Nobles; Shoshona Le; Suxiang Tong; Vivien Dugan; Yvette Unoarumhi                                                                                                                                                                                                                                                                                                                                                                                                                                                                |                                                                                                                                                                                                                                                                                                                                                                                                                                                                                                                                                                                                                  |
| EPI_ISL_754579                                                                                                      | Wadsworth Center, New York State Department of Health                                                                                                                                                                       | Wadsworth Center, New York State Department of Health                                                                                                                                     | Alexis Russel; Daryl M. Lamson; Erasmus Schneider; Erica Lasek-Nesselquist; John Kelly; Jonathan Pitnick; Kirsten St. George; Matthew Shudt; Melissa A Leisner; Navjot Singh; Sara Griesemer                                                                                                                                                                                                                                                                                                                                                                                                                                                                                                                                                                                                                                     |                                                                                                                                                                                                                                                                                                                                                                                                                                                                                                                                                                                                                  |
| EPI_ISL_456190,<br>EPI_ISL_536790,<br>EPI_ISL_548064,<br>EPI_ISL_548101                                             | Waikato Hospital                                                                                                                                                                                                            | Institute of Environmental Science and Research (ESR)                                                                                                                                     | Anja Werno; Antje van der Linden; Arlo Upton; Chris Mansell; David Hammer; Dragana Drinkovic; Erasmus Smit; Gary McAuliffe; Hana Sofia Andersson; Hermes Perez; James Ussher; Jill Sherwood; Jing Wang; Joep de Lig; Josh Freeman; Julia Howard; Juliet Elvy; Lauren Jelly; Mary DeAlmeida; Matt Blakiston; Matt Storey; Matthew Rogers; Max Bloomfield; Michael Addidle; Michelle Balm; Muhammad Faisal; Nikki Freed; Olin Silander; Sally Roberts; Sarah Jefferies; Sharmini Muttaiyah; Susan Morpeth; Susan Taylor; Timothy Blackmore; Vani Sathyendran; Veronica Playle; Virginia Hope; Xiaoyun Ren                                                                                                                                                                                                                          |                                                                                                                                                                                                                                                                                                                                                                                                                                                                                                                                                                                                                  |
| EPI_ISL_1833203                                                                                                     | Wales Specialist Virology Centre Sequencing lab; Pathogen Genomics Unit                                                                                                                                                     | Public Health Wales Microbiology Cardiff Wales Specialist Virology Centre                                                                                                                 | Alec Birchley; Alexander Adams; Amy Gaskin; Angela Marchbank; Bree Gatica-Wilcox; Catherine Moore; Jason Coombes; Joanne Watkins; Joel Southgate; Johnathan Evans; Laura Gifford; Lauren Gilbert; Lee Graham; Malorie Perry; Matthew Bull; Nicole Pacchiarini; Sally Corden; Sara Kumziene-Summerhayes; Sara Rey; Sarah Taylor; Simon Cottrell; Sophie Jones; Tom Connor                                                                                                                                                                                                                                                                                                                                                                                                                                                         |                                                                                                                                                                                                                                                                                                                                                                                                                                                                                                                                                                                                                  |
| EPI_ISL_417160                                                                                                      | Washington State Department of Health                                                                                                                                                                                       | Seattle Flu Study                                                                                                                                                                         | Chu et al                                                                                                                                                                                                                                                                                                                                                                                                                                                                                                                                                                                                                                                                                                                                                                                                                        |                                                                                                                                                                                                                                                                                                                                                                                                                                                                                                                                                                                                                  |
| EPI_ISL_416538                                                                                                      | Wellington Hospital                                                                                                                                                                                                         | Institute of Environmental Science and Research (ESR)                                                                                                                                     | New Zealand; Newtown; Riddiford Street; Wellington 6021; Wellington Hospital; Wellington SCL                                                                                                                                                                                                                                                                                                                                                                                                                                                                                                                                                                                                                                                                                                                                     |                                                                                                                                                                                                                                                                                                                                                                                                                                                                                                                                                                                                                  |
| EPI_ISL_456161,<br>EPI_ISL_456185,<br>EPI_ISL_456320                                                                | Wellington SCL                                                                                                                                                                                                              | Institute of Environmental Science and Research (ESR)                                                                                                                                     | Anja Werno; Antje van der Linden; Arlo Upton; Chris Mansell; David Hammer; Dragana Drinkovic; Erasmus Smit; Gary McAuliffe; Hana Sofia Andersson; James Ussher; Jill Sherwood; Joep de Lig; Josh Freeman; Julia Howard; Juliet Elvy; Lauren Jelly; Mary DeAlmeida; Matt Blakiston; Matt Storey; Matthew Rogers; Max Bloomfield; Michael Addidle; Michelle Balm; Sally Roberts; Sarah Jefferies; Sharmini Muttaiyah; Susan Morpeth; Susan Taylor; Timothy Blackmore; Vani Sathyendran; Veronica Playle; Virginia Hope; Xiaoyun Ren                                                                                                                                                                                                                                                                                                |                                                                                                                                                                                                                                                                                                                                                                                                                                                                                                                                                                                                                  |
| EPI_ISL_1016878,<br>EPI_ISL_1250695,<br>EPI_ISL_2964938,<br>EPI_ISL_2964939                                         | Wellington SCL (WN)                                                                                                                                                                                                         | Institute of Environmental Science and Research (ESR)                                                                                                                                     | Anja Werno; Antje van der Linden; Arlo Upton; Chris Mansell; David Hammer; Dragana Drinkovic; Erasmus Smit; Gary McAuliffe; Hana Sofia Andersson; Hermes Perez; James Ussher; Jill Sherwood; Jing Wang; Joep de Lig; Josh Freeman; Julia Howard; Juliet Elvy; Lauren Jelly; Mary DeAlmeida; Matt Blakiston; Matt Storey; Matthew Rogers; Max Bloomfield; Michael Addidle; Michelle Balm; Muhammad Faisal; Nikki Freed; Olin Silander; Olivia Stroeven; Rachel Boyle; Sally Roberts; SallyAnn Harbison; Sarah Jefferies; Sharmini Muttaiyah; Susan Morpeth; Susan Taylor; Timothy Blackmore; Vani Sathyendran; Veronica Playle; Virginia Hope; Xiaoyun Ren                                                                                                                                                                        |                                                                                                                                                                                                                                                                                                                                                                                                                                                                                                                                                                                                                  |
| EPI_ISL_2422499,<br>see above                                                                                       | EPI_ISL_2422500, EPI_ISL_2422505, EPI_ISL_2422515, EPI_ISL_2422517, EPI_ISL_2422520, EPI_ISL_2422521, EPI_ISL_2422526, EPI_ISL_2422530, EPI_ISL_2422549, EPI_ISL_2422571, EPI_ISL_2422595, EPI_ISL_2422614, EPI_ISL_2422624 | West African Centre for Cell Biology of Infectious Pathogens, University of Ghana, Legon                                                                                                  | WACCBIP, University of Ghana, Volta Road, Legon, Accra                                                                                                                                                                                                                                                                                                                                                                                                                                                                                                                                                                                                                                                                                                                                                                           | Collins M. Morang'a; Dominic S. Y. Amuzu; Dominic S.Y. Amuzu; Edward Danso Fenteng; Emmanuel Kudjo; Evelyn B. Quansah; Evelyn Y Bonney; Frederick Tei-Maya; Ivy A Asante; Joe K. Mutungi; John K. Odoom; Joseph HK Bonney; Joyce M. Ngo; Lawrence Ofori-Boadu; Lucas N. Amenga-Etego and Gordon A Awandare; Lucas N. Amenga-Etego and Gordon A. Awandare; Mildred Adusei-Poku; Nicaise T. Ndam; Patrick Tetteh Ababio; Peter K Quashie; Peter K. Quashie; Philip M Soglo; Philip M. Soglo; Samirah Saïid; Theophilus Odoom; Vincent Appiah; Violet McCormack; Violette M'cornack; William K. Ampofo; Yaw Bediako |
| EPI_ISL_1255107,<br>see above                                                                                       | EPI_ISL_1255110, EPI_ISL_1255150, EPI_ISL_1255152, EPI_ISL_1255164, EPI_ISL_1255170, EPI_ISL_1255176, EPI_ISL_1255186, EPI_ISL_1255188, EPI_ISL_1255199, EPI_ISL_1255229, EPI_ISL_1255231, EPI_ISL_1255244, EPI_ISL_1255250 | West African Centre for Cell Biology of Infectious Pathogens (WACCBIP), University of Ghana, Accra, Ghana                                                                                 | West African Centre for Cell Biology of Infectious Pathogens (WACCBIP), University of Ghana, Volta Road, Legon, Ghana                                                                                                                                                                                                                                                                                                                                                                                                                                                                                                                                                                                                                                                                                                            | ; Abdoulaye B Diallo; Abdul-Karim Abass; Aisha Mohammed; Benjamin Demah Nuertey; Collins M. Morang'a; Dam Kenneth Mibut; Dominic S.Y. Amuzu; Emmanuel Amoako4; Evelyn B. Quansah; Frederick Kumi-Ansah; Frederick Tei-Maya; Gordon A Awandare; Joyce M. Ngo; Kesego Tapela; Lucas N. Amenga-Etego; Nelson Kibinge; Oliver D Boakyē5; Peter K Quashie; Philip M. Soglo; Samirah Saïid; Samuel Kaba Akoriyeh; Theophilus Odoom; Vanessa Magnussen; Vincent Appiah; Yaw Bediako                                                                                                                                     |
| EPI_ISL_451397                                                                                                      | West China Hospital of Sichuan University                                                                                                                                                                                   | State Key Laboratory of Biotherapy of Sichuan University                                                                                                                                  | Baowen Du; Binwu Ying; Chao Tang; Chuan Chen; Hancheng Wei; Jia Geng; Jing-wen Lin; Lu Chen; Mingxia Yu; Minjin Wang; Weimin Li; Yongzhao Zhou                                                                                                                                                                                                                                                                                                                                                                                                                                                                                                                                                                                                                                                                                   |                                                                                                                                                                                                                                                                                                                                                                                                                                                                                                                                                                                                                  |
| EPI_ISL_2382409                                                                                                     | Wisma Atlet                                                                                                                                                                                                                 | National Institute of Health Research and Development                                                                                                                                     | Arie Ardiansyah Nugraha; Hana Aparsi Pawestri; Hartanti Dian Ikawati; Kartika Dewi Puspa; Krisna Pangesti; Nelly Puspandari; Subangkit; Triyana Soekarso; Vivi Setiawaty                                                                                                                                                                                                                                                                                                                                                                                                                                                                                                                                                                                                                                                         |                                                                                                                                                                                                                                                                                                                                                                                                                                                                                                                                                                                                                  |
| EPI_ISL_1300721,<br>EPI_ISL_1493351,<br>EPI_ISL_1731710,<br>EPI_ISL_2500299,<br>EPI_ISL_2692941,<br>EPI_ISL_2692972 | Wojewodzka Stacja Sanitarno-Epidemiologiczna w Olsztynie, Laboratorium Badan Epidemiologiczno-Klinicznych                                                                                                                   | Wojewodzka Stacja Sanitarno-Epidemiologiczna w Olsztynie, Laboratorium Badan Epidemiologiczno-Klinicznych                                                                                 | Aleksandra Kobiakto; Barbara Dolinska; Emilia Tarabasz; Ewa Liszewska; Marta Lukian; Monika Czerminska; Patryk Bielecki; Paulina Rozycka; Sylwia Krzetowska; Tomasz Jakubczak                                                                                                                                                                                                                                                                                                                                                                                                                                                                                                                                                                                                                                                    |                                                                                                                                                                                                                                                                                                                                                                                                                                                                                                                                                                                                                  |
| EPI_ISL_3009173                                                                                                     | Wojewódzki Szpital Specjalistyczny Laboratorium Mikrobiologiczne                                                                                                                                                            | 1. Academic Center for Pathomorphological and Genetic-Molecular Diagnostics ltd, Białystok, Poland 2. National Institute of Public Health - National Institute of Hygiene, Warsaw, Poland | Anetta Sulewska; Jacek Nikiński; Janusz Dzieciol; Joanna Kisłuk; Katarzyna Zacharczuk; Konrad Raczkowski; Magdalena Nowakowska; Małgorzata Sadkowska-Todys; Piotr Karabowicz; Piotr Majewski; Przemysław Biełek. Joanna Reszeć; Radosław Charkiewicz; Tomasz Wolkowicz                                                                                                                                                                                                                                                                                                                                                                                                                                                                                                                                                           |                                                                                                                                                                                                                                                                                                                                                                                                                                                                                                                                                                                                                  |
| EPI_ISL_454905,<br>EPI_ISL_454939,<br>EPI_ISL_454982,<br>EPI_ISL_462931                                             | Wuhan Chain Medical Labs (CMLabs)                                                                                                                                                                                           | State Key Laboratory of Biotherapy of Sichuan University                                                                                                                                  | Baowen Du; Binwu Ying; Chao Tang; Chuan Chen; Hancheng Wei; Jia Geng; Jing-wen Lin; Lu Chen; Mingxia Yu; Minjin Wang; Weimin Li; Yongzhao Zhou                                                                                                                                                                                                                                                                                                                                                                                                                                                                                                                                                                                                                                                                                   |                                                                                                                                                                                                                                                                                                                                                                                                                                                                                                                                                                                                                  |
| EPI_ISL_1532099,<br>EPI_ISL_2404707,<br>EPI_ISL_2444758,<br>EPI_ISL_2716283,<br>EPI_ISL_2775587                     | Wyoming Public Health Laboratory                                                                                                                                                                                            | Center for Global Health, University of New Mexico Health Sciences Center                                                                                                                 | Cari Sloma; Darrell Dinwiddie; Darryl Domman; Kurt Schwalm; Noah Hull; Rob Christensen; Wanda Manley                                                                                                                                                                                                                                                                                                                                                                                                                                                                                                                                                                                                                                                                                                                             |                                                                                                                                                                                                                                                                                                                                                                                                                                                                                                                                                                                                                  |
| EPI_ISL_1595852                                                                                                     | Wyoming Public Health Laboratory                                                                                                                                                                                            | Wyoming Public Health Laboratory                                                                                                                                                          | Ashley Norberg; Brian Dominguez; Brittany Oher; Cari Sloma; Channing Weber; Chayse Rowley; Elliot Thomasson; Jim Mildenberg; Lynette Gumbleton; Marley Goetz; Noah Hull; Robert Petit; Sam Britz; Taylor Fearing; Wanda Manley; and Rob Christensen                                                                                                                                                                                                                                                                                                                                                                                                                                                                                                                                                                              |                                                                                                                                                                                                                                                                                                                                                                                                                                                                                                                                                                                                                  |
| EPI_ISL_2727271                                                                                                     | ZARV/NHLS, Department Medical Virology, University of Pretoria                                                                                                                                                              | KRISP, KZN Research Innovation and Sequencing Platform                                                                                                                                    | Jiann Zhou; Meiling Zhang; Senquan Jia; Xiang Zhao; Xiaoqing Fu; Yanan Feng; Yuchao Wu; Zhixiao Chen                                                                                                                                                                                                                                                                                                                                                                                                                                                                                                                                                                                                                                                                                                                             |                                                                                                                                                                                                                                                                                                                                                                                                                                                                                                                                                                                                                  |
| EPI_ISL_2727350,<br>EPI_ISL_2899747                                                                                 | ZARV/NHLS, Department Medical Virology, University of Pretoria                                                                                                                                                              | KRISP, Kzn Research Innovation and Sequencing Platform                                                                                                                                    | Adriano Mendes; Amy Strydom; Emmanuel SJ; Giandhari J; Lessells R; Micheala Davids; Naidoo Y; Pillay S; Ramphal U; Sim Mayaphi and Marietjie Venter; Tegally H; Wilkinson E; de Oliveira T                                                                                                                                                                                                                                                                                                                                                                                                                                                                                                                                                                                                                                       |                                                                                                                                                                                                                                                                                                                                                                                                                                                                                                                                                                                                                  |
| EPI_ISL_3039570                                                                                                     | ZOL                                                                                                                                                                                                                         | Jessa                                                                                                                                                                                     | Berden et al. on behalf of the Jessa_cmdLab                                                                                                                                                                                                                                                                                                                                                                                                                                                                                                                                                                                                                                                                                                                                                                                      |                                                                                                                                                                                                                                                                                                                                                                                                                                                                                                                                                                                                                  |
| EPI_ISL_666636,<br>EPI_ISL_718079,<br>EPI_ISL_718096                                                                | ZOTZ KLIMAS MVZ Düsseldorf-Centrum GbR ÜBAG für Labormedizin, Genetik, Zytologie, Pathologie                                                                                                                                | Center of Medical Microbiology, Virology, and Hospital Hygiene, University of Duesseeldorf                                                                                                | Alexander Dithley; Andreas Walker; Ashley-Jane Duplessis; Daniel Strelow; Jessica Nicolai; Jörg Timm; Katrin Hoffmann; Klaus Pfeffer; Lisanna Hülse; Malte Kohns Vasconcelos; Marek Korencak; Maximilian Damagnez; Nadine Lübke; Patrick Finzer; Rainer Zot; Tobias Wienemann; Torsten Houwaart                                                                                                                                                                                                                                                                                                                                                                                                                                                                                                                                  |                                                                                                                                                                                                                                                                                                                                                                                                                                                                                                                                                                                                                  |
| EPI_ISL_2377264                                                                                                     | Zakład Laboratoryjnej Diagnostyki Klinicznej USK Białystok                                                                                                                                                                  | 1. National Institute of Public Health - National Institute of Hygiene; 2. Eurofins Genomics Europe Sequencing GmbH                                                                       | ECDC COVID-19 WGS support team; Eurofins Genomics Europe Sequencing Team; Gierczyński Rafał; Sadkowska-Todys Małgorzata; Wolkowicz Tomasz; Zacharczuk Katarzyna                                                                                                                                                                                                                                                                                                                                                                                                                                                                                                                                                                                                                                                                  |                                                                                                                                                                                                                                                                                                                                                                                                                                                                                                                                                                                                                  |
| EPI_ISL_2674012,<br>EPI_ISL_2674013                                                                                 | Zavod za javno zdravstvo Šibensko- Kninske Županije                                                                                                                                                                         | Hrvatski zavod za javno zdravstvo                                                                                                                                                         | Irena Tabain; Ivana Ferenčak                                                                                                                                                                                                                                                                                                                                                                                                                                                                                                                                                                                                                                                                                                                                                                                                     |                                                                                                                                                                                                                                                                                                                                                                                                                                                                                                                                                                                                                  |
| EPI_ISL_1911196,<br>EPI_ISL_1911197,<br>EPI_ISL_1911250                                                             | Zhejiang Provincial Center for Disease Control and Prevention Zhoushan Center for Disease Prevention and Control                                                                                                            | Zhejiang Province Center of Disease Control and prevention                                                                                                                                | Bing WU; Hongling Wang; Yanjun Zhang                                                                                                                                                                                                                                                                                                                                                                                                                                                                                                                                                                                                                                                                                                                                                                                             |                                                                                                                                                                                                                                                                                                                                                                                                                                                                                                                                                                                                                  |
| EPI_ISL_2716621                                                                                                     | aboratoire National de Référence pour les Fièvres Hémmorragiques Virales, Centre Muraz                                                                                                                                      | Centre Muraz                                                                                                                                                                              | Ange Badjo; Arsène Zongo; Essia Belarbi; Fabian Leendertz; Grit Schubert; Jasmin Schlotterbeck; Saïdou Ouedraogo; Soumeia Ouangraoua; Thérèse Kagone                                                                                                                                                                                                                                                                                                                                                                                                                                                                                                                                                                                                                                                                             |                                                                                                                                                                                                                                                                                                                                                                                                                                                                                                                                                                                                                  |
| EPI_ISL_1727293,<br>EPI_ISL_1727369                                                                                 | amedes MVZ Hannover                                                                                                                                                                                                         | Robert Koch Institute                                                                                                                                                                     |                                                                                                                                                                                                                                                                                                                                                                                                                                                                                                                                                                                                                                                                                                                                                                                                                                  |                                                                                                                                                                                                                                                                                                                                                                                                                                                                                                                                                                                                                  |
| EPI_ISL_1281348                                                                                                     | amedes MVZ Jena                                                                                                                                                                                                             | Robert Koch Institute                                                                                                                                                                     |                                                                                                                                                                                                                                                                                                                                                                                                                                                                                                                                                                                                                                                                                                                                                                                                                                  |                                                                                                                                                                                                                                                                                                                                                                                                                                                                                                                                                                                                                  |
| EPI_ISL_1141025                                                                                                     | amedes MVZ für Laboratoriumsmedizin Rhein/Ruhr                                                                                                                                                                              | Robert Koch Institute                                                                                                                                                                     |                                                                                                                                                                                                                                                                                                                                                                                                                                                                                                                                                                                                                                                                                                                                                                                                                                  |                                                                                                                                                                                                                                                                                                                                                                                                                                                                                                                                                                                                                  |
| EPI_ISL_828071,<br>EPI_ISL_828410,<br>EPI_ISL_829200                                                                | deCODE genetics                                                                                                                                                                                                             | deCODE genetics                                                                                                                                                                           | Agnar Helgason; Alma Moller; Arna B Agustsdottir; Arnaldur Gylfason; Asgeir Sigurdsson; Aslaug Jonasdottir; Berglind Eiriksdottir; Bjarni Thorbjornsson; Brynjar O Jensson; Daniel F Gudbjartsson; Droplaug N Magnúsdottir; Elisabet E Gardarsdottir; Emil A Thorarensen; Gardar Sveinbjornsson; Gisli Masson; Gudmundur Georgsson; Gudmundur L Norddahl; Gudrun Sigmundsdottir; Hakon Jonsson; Hannes Eggertsson; Hilma Halm; Ingileif Jonsdottir; Jona Saemundsdottir; Kamilla S Josefsdottir; Karl Stefansson; Karl G Kristinnsson; Kjartan R Gudmundsson; Kristin E Sveinsdottir; Louisa le Roux; Runey Sveinsdottir; Olafur T Magnusson; Olafur T Magnusson; Patrick Melsted; Hilma Solem; Rún Fridrikisdottir; Solvi Rognvaldsson; Thora R Gunnarsdottir; Thorodd Kristjansson; Thorolfur Gudnason; Unnur Thorsteinsdottir |                                                                                                                                                                                                                                                                                                                                                                                                                                                                                                                                                                                                                  |
| EPI_ISL_732911                                                                                                      | genXone SA, Molecular Diagnostics Laboratory / NZOO                                                                                                                                                                         | genXone SA, Research & Development Laboratory                                                                                                                                             | Grzegorz Nowicki; Jakub Grabowski; Maciej Sykulski; Michał Kaszuba; Monika Mańkowska-Woźniak; Natalia Drwęska-Matelska; Łukasz Krych                                                                                                                                                                                                                                                                                                                                                                                                                                                                                                                                                                                                                                                                                             |                                                                                                                                                                                                                                                                                                                                                                                                                                                                                                                                                                                                                  |
| EPI_ISL_458286                                                                                                      | unknown                                                                                                                                                                                                                     | Bundeswehr Institute of Microbiology                                                                                                                                                      | Antwerpen; Bestehorn-Willmann; Eckstein, S.; Handrick, S.; M.C.; M.H.; M.S.; Najja, H.; R. and Ben Moussa, M.; Rehn, A.; Stoecker, K.; Walter; Woelfel                                                                                                                                                                                                                                                                                                                                                                                                                                                                                                                                                                                                                                                                           |                                                                                                                                                                                                                                                                                                                                                                                                                                                                                                                                                                                                                  |
| EPI_ISL_463005,<br>EPI_ISL_463006                                                                                   | unknown                                                                                                                                                                                                                     | Clinical virology                                                                                                                                                                         | Fares, W.; Triki, H.                                                                                                                                                                                                                                                                                                                                                                                                                                                                                                                                                                                                                                                                                                                                                                                                             |                                                                                                                                                                                                                                                                                                                                                                                                                                                                                                                                                                                                                  |
| EPI_ISL_487270                                                                                                      | unknown                                                                                                                                                                                                                     | Communicable Disease Laboratory, Public Health Directorate                                                                                                                                | AlTaif, Z.; AlWasti, H.; Shehab, F.; Zaed, A.                                                                                                                                                                                                                                                                                                                                                                                                                                                                                                                                                                                                                                                                                                                                                                                    |                                                                                                                                                                                                                                                                                                                                                                                                                                                                                                                                                                                                                  |
| EPI_ISL_437612                                                                                                      | unknown                                                                                                                                                                                                                     | Faculty of Medicine                                                                                                                                                                       | Buathong, R.; Bunprakob, S.; Ghai, S.; Joyjinda, A.; Mungaomklang, A.; Petcharat, S.; Plipat; Prasithsirikul, W.; Rodpan, A.; Sirichan, N.; T. and Hemachudha, T.; Wacharapluesadee, S.                                                                                                                                                                                                                                                                                                                                                                                                                                                                                                                                                                                                                                          |                                                                                                                                                                                                                                                                                                                                                                                                                                                                                                                                                                                                                  |

|                                                      |         |                                                                                                                                                 |                                                                                                                                             |                           |
|------------------------------------------------------|---------|-------------------------------------------------------------------------------------------------------------------------------------------------|---------------------------------------------------------------------------------------------------------------------------------------------|---------------------------|
| EPI_ISL_437616,<br>EPI_ISL_437618,<br>EPI_ISL_437622 |         |                                                                                                                                                 |                                                                                                                                             |                           |
| EPI_ISL_507012                                       | unknown | Infectious Diseases Research, King Abdullah International<br>Medical Research Center (KAIMRC)                                                   |                                                                                                                                             | Alghoribi, M.F.           |
| EPI_ISL_476559                                       | unknown | Laboratoire Sciences et Technologies de la Santé (STS)<br>Institut Supérieur des Sciences de la Santé Université Hassan<br>1er, Settat, Morocco | Abderraouf Hilali; Amal Souiri; Hajar Lemriss; Jawad Bouzid; Mustapha Mouallif; Narjis Amar; Sanaâ Lemriss; Saâd EL Kabbaj; Touria Essayagh |                           |
| EPI_ISL_483060                                       | unknown | Microbiology, Canterbury Health Laboratories                                                                                                    |                                                                                                                                             | Anderson, T.; Dilcher, M. |
